# Supplementary material for: Gene Regulatory Network Characterization of Gastric Cancer’s Histological Subtypes: Distinctive Biological and Clinically Relevant Master Regulators
Source: Cancers (Basel). 2022 Oct 10;14(19):4961. doi: 10.3390/cancers14194961 (PMC9563962; doi:10.3390/cancers14194961)
Supplement: Supplementary file 1 [file cancers-14-04961-s001.zip]

Archive with 8 entries (8 files):
- FileS1.xlsx
- FileS2.xlsx
- FileS3.xlsx
- FileS4.xlsx
- FileS5.xlsx
- FileS6.xlsx
- FileS7.xlsx
- Supplementary Figures&Tables.pdf
