# Supplementary material for: Gene Regulatory Network Characterization of Gastric Cancer’s Histological Subtypes: Distinctive Biological and Clinically Relevant Master Regulators
Source: Cancers (Basel). 2022 Oct 10;14(19):4961. doi: 10.3390/cancers14194961 (PMC9563962; doi:10.3390/cancers14194961)
Supplement: Supplementary file 1 [file cancers-14-04961-s001.zip › FileS1.xlsx]

## Sheet: Diffuse
gene	chrom	chromStart	chromEnd	strand	logFC	logCPM	LR	PValue	FDR
PRG4	chr1	186296279	186314562	+	3.71632	1.98778	165.517	7.05144e-38	1.95522e-33
MEF2B	chr19	19145568	19170289	-	3.79526	2.3271	136.196	1.80812e-31	2.50677e-27
BCHE	chr3	165772904	165837472	-	3.68669	1.61263	133.302	7.76717e-31	7.17893e-27
MGARP	chr4	139266163	139280338	-	2.57599	-2.05213	127.172	1.70332e-29	1.18074e-25
DNAJB5	chr9	34989641	34998900	+	2.40969	4.07009	126.2	2.78027e-29	1.54182e-25
KLHL4	chrX	87517749	87670050	+	2.56115	0.317778	125.712	3.55558e-29	1.64315e-25
TCEAL7	chrX	103330196	103332326	+	2.00642	0.570949	123.693	9.83477e-29	3.6752e-25
LINC00702	chr10	4201141	4243912	-	3.15948	2.04235	123.544	1.06036e-28	3.6752e-25
CD79B	chr17	63928740	63932354	-	2.89849	2.83459	117.289	2.48105e-27	7.64383e-24
BOC	chr3	113211003	113287459	+	2.45896	4.55599	116.57	3.5654e-27	9.88615e-24
PDLIM3	chr4	185500660	185535612	-	2.33601	6.28174	115.91	4.97436e-27	1.2539e-23
DCN	chr12	91140484	91183123	-	1.80841	8.29557	114.867	8.41632e-27	1.94473e-23
CADM3	chr1	159171609	159203313	+	3.29866	1.93233	112.601	2.63893e-26	5.62864e-23
CASQ2	chr1	115700007	115768781	-	3.62562	2.65082	112.323	3.03587e-26	6.01276e-23
ZFPM2	chr8	104590733	105804532	+	2.03417	2.26067	112.179	3.26515e-26	6.03575e-23
CFL2	chr14	34706769	34714823	-	2.08598	5.1103	111.635	4.29572e-26	7.44448e-23
NAP1L3	chrX	93670930	93673568	-	2.04872	0.502142	109.547	1.23146e-25	1.7892e-22
CCDC80	chr3	112596794	112649530	-	2.39061	7.16576	109.503	1.25918e-25	1.7892e-22
SGCD	chr5	155870344	156767788	+	2.03333	4.30474	109.473	1.2786e-25	1.7892e-22
FHL1	chrX	136146702	136211359	+	2.76084	6.82646	109.454	1.29054e-25	1.7892e-22
MGP	chr12	14881181	14885926	-	2.36245	7.5448	109.321	1.38035e-25	1.82258e-22
GAPT	chr5	58491435	58497090	+	2.27709	1.51915	108.475	2.11471e-25	2.66531e-22
CLMP	chr11	123069865	123195281	-	2.09321	4.43165	108.252	2.36628e-25	2.85271e-22
CAV1	chr7	116524785	116561184	+	1.93901	6.39075	106.857	4.78481e-25	5.31447e-22
SPARCL1	chr4	87473335	87531061	-	2.17334	7.93028	106.854	4.79161e-25	5.31447e-22
BNC2	chr9	16409503	16870843	-	2.09829	3.71969	106.476	5.79845e-25	6.18383e-22
MEF2C	chr5	88717117	88904257	-	1.43432	4.74048	105.149	1.1327e-24	1.12185e-21
ACTA2	chr10	88935074	88991390	-	2.18007	8.85452	105.149	1.13285e-24	1.12185e-21
FERMT2	chr14	52857268	52952435	-	1.83281	5.73367	104.957	1.24817e-24	1.19342e-21
NEXN	chr1	77888513	77943895	+	2.31042	5.21542	104.727	1.40161e-24	1.29546e-21
ANK2	chr4	112818109	113383740	+	2.39483	3.89268	103.966	2.05769e-24	1.84051e-21
CLIP3	chr19	36014660	36033343	-	1.94856	4.65047	103.49	2.61658e-24	2.26726e-21
SYNC	chr1	32680360	32703596	-	2.46385	3.20662	103.272	2.92098e-24	2.45433e-21
FCER1A	chr1	159289714	159308224	+	2.8416	0.490106	102.883	3.55529e-24	2.89944e-21
SEPT6	chrX	119615724	119693370	-	1.46281	5.34851	102.237	4.92648e-24	3.89738e-21
RECK	chr9	36036433	36124451	+	1.42043	3.12549	102.184	5.06008e-24	3.89738e-21
VPREB3	chr22	23752743	23754468	-	3.32926	1.80454	102.072	5.35468e-24	4.01283e-21
RP11-867G23.10	chr11	66409158	66417137	+	2.6404	-2.05052	101.623	6.71687e-24	4.80803e-21
MRGPRF	chr11	69004395	69013409	-	2.4528	4.64288	101.593	6.81981e-24	4.80803e-21
RP5-1198O20.4	chr1	44030443	44115913	+	2.00914	0.232831	101.559	6.93599e-24	4.80803e-21
GYPC	chr2	126655933	126696675	+	1.64458	4.26148	101.401	7.51198e-24	5.04547e-21
CSRP1	chr1	201483530	201509456	-	1.88692	8.4935	101.367	7.64244e-24	5.04547e-21
CCL14	chr17	35983291	35987004	-	2.80171	2.30926	101.154	8.50989e-24	5.48749e-21
HMP19	chr5	174045604	174243501	+	3.7301	-0.338889	100.774	1.03104e-23	6.38023e-21
MYLK	chr3	123610049	123884331	-	2.69289	8.42304	100.765	1.03545e-23	6.38023e-21
MSRB3	chr12	65278643	65488244	+	2.15075	5.30659	100.601	1.12517e-23	6.78235e-21
ZCCHC24	chr10	79382325	79445627	-	1.79137	5.21952	100.525	1.16892e-23	6.89611e-21
FIGF	chrX	15345591	15384376	-	3.14328	0.0251076	100.301	1.30941e-23	7.56403e-21
SLIT3	chr5	168661733	169301129	-	2.03957	5.36343	99.8849	1.61517e-23	9.13991e-21
DIXDC1	chr11	111927144	112022584	+	1.77603	4.68435	99.68	1.79124e-23	9.93353e-21
POU2F2	chr19	42086110	42196585	-	1.79204	4.42664	99.5465	1.91614e-23	1.04178e-20
SFRP1	chr8	41261958	41309497	-	3.19494	4.12216	99.4495	2.01232e-23	1.07303e-20
CNRIP1	chr2	68284171	68320051	-	1.36761	2.82138	99.3568	2.10873e-23	1.08714e-20
CLEC17A	chr19	14583084	14611157	+	3.34266	0.698046	99.3357	2.13134e-23	1.08714e-20
MYL9	chr20	36541484	36551447	+	2.5416	8.98523	99.2767	2.19572e-23	1.08714e-20
GLI3	chr7	41960950	42237870	-	1.78906	3.42439	99.2433	2.23315e-23	1.08714e-20
JAM2	chr21	25639272	25717562	+	1.84171	3.71686	99.2354	2.24208e-23	1.08714e-20
KIAA1644	chr22	44243667	44312851	-	2.71421	3.04269	99.2073	2.27403e-23	1.08714e-20
RP11-166D19.1	chr11	122028355	122116323	-	2.29449	3.62108	99.1152	2.38228e-23	1.11959e-20
PKNOX2	chr11	125164687	125433389	+	2.05332	0.880676	98.9181	2.63168e-23	1.21619e-20
IGF1	chr12	102395867	102480645	-	2.66956	5.19736	98.7648	2.84349e-23	1.261e-20
CPED1	chr7	120988677	121297444	+	2.22137	4.72467	98.7582	2.85299e-23	1.261e-20
MAGI2-AS3	chr7	79452877	79471208	+	1.51641	3.17289	98.7498	2.86507e-23	1.261e-20
ABI3BP	chr3	100749156	100993515	-	2.4304	5.20587	98.718	2.91151e-23	1.26141e-20
OGN	chr9	92383967	92404696	-	3.3158	5.17781	98.6057	3.08137e-23	1.31447e-20
IL31RA	chr5	55851379	55922853	+	2.8329	-0.866574	98.2969	3.60138e-23	1.51302e-20
ACTA2-AS1	chr10	88932390	88940820	+	2.21968	2.43165	98.1772	3.8257e-23	1.58327e-20
RBMS3	chr3	29280982	30010391	+	1.69102	3.6226	97.8606	4.48908e-23	1.83049e-20
CRYAB	chr11	111908565	111923722	-	2.29967	4.36309	97.7542	4.73666e-23	1.90345e-20
TAGLN	chr11	117199321	117204782	+	2.50246	9.1735	97.7213	4.81605e-23	1.90771e-20
PGR	chr11	101029624	101130524	-	2.23183	1.65704	97.6236	5.05962e-23	1.97596e-20
POPDC2	chr3	119636457	119665324	-	2.61979	2.63008	97.4108	5.63387e-23	2.16967e-20
LDB3	chr10	86668449	86736068	+	3.3062	3.12041	97.2285	6.17705e-23	2.33102e-20
MFAP4	chr17	19383442	19387240	-	2.19621	6.93525	97.2145	6.22099e-23	2.33102e-20
DACT3	chr19	46647612	46661138	-	2.28821	3.75181	97.1451	6.44288e-23	2.38198e-20
COL14A1	chr8	120059780	120372036	+	2.17538	6.25627	97.0318	6.82241e-23	2.4891e-20
VIP	chr6	152750798	152759765	+	4.23579	1.79018	96.985	6.98561e-23	2.51554e-20
RYR3	chr15	33310962	33866102	+	2.833	0.952153	96.6461	8.28955e-23	2.94683e-20
ASB2	chr14	93934153	93976791	-	2.50545	3.64733	96.5516	8.69492e-23	3.05181e-20
PYGM	chr11	64746389	64760297	-	2.61909	1.81361	96.5049	8.90242e-23	3.08558e-20
BHMT2	chr5	79069717	79089466	+	2.1423	1.03792	96.2324	1.02162e-22	3.48622e-20
FBXL22	chr15	63597353	63602428	+	2.10103	2.01018	96.2105	1.03294e-22	3.48622e-20
P2RY8	chrX	1462572	1537107	-	1.95373	3.34617	96.1903	1.04355e-22	3.48622e-20
KCNMB1	chr5	170374671	170389677	-	2.56509	4.48887	96.0918	1.09678e-22	3.62043e-20
RASSF2	chr20	4780023	4823645	-	1.54511	4.79491	95.6416	1.37685e-22	4.49145e-20
MBNL1-AS1	chr3	152262616	152269555	-	2.50553	3.24297	95.5162	1.46686e-22	4.72943e-20
LIMS2	chr2	127638381	127681786	-	2.08441	4.94614	95.3564	1.59019e-22	5.06332e-20
SSBP2	chr5	81413021	81751797	-	1.61557	3.56734	95.3356	1.60694e-22	5.06332e-20
TNXB	chr6	32041154	32115334	-	2.28988	6.12749	95.1964	1.72403e-22	5.37123e-20
MYOCD	chr17	12665890	12768949	+	2.74064	4.27797	95.1356	1.77778e-22	5.47714e-20
CNKSR2	chrX	21374418	21654695	+	3.20977	0.785081	94.9912	1.91231e-22	5.78515e-20
STMN2	chr8	79610814	79666175	+	3.06401	0.957661	94.9838	1.91948e-22	5.78515e-20
PALLD	chr4	168497066	168928457	+	1.64339	7.7816	94.9148	1.9876e-22	5.92604e-20
MIR497HG	chr17	7015818	7019659	-	1.66978	0.215322	94.855	2.04853e-22	6.04272e-20
HSPB8	chr12	119178642	119221131	+	2.61825	4.98578	94.7622	2.14682e-22	6.26601e-20
AFF3	chr2	99545419	100142739	-	2.31313	2.2832	94.5906	2.34123e-22	6.76225e-20
NHSL2	chrX	71910818	72161750	+	1.77946	4.10658	94.3189	2.68578e-22	7.67747e-20
HTR2A	chr13	46831550	46897076	-	2.10814	0.674162	94.2349	2.80219e-22	7.92849e-20
STON1	chr2	48529383	48598513	+	2.0279	4.43986	93.7596	3.56268e-22	9.9784e-20
PBX3	chr9	125747345	125967377	+	1.3026	4.45884	93.7168	3.64059e-22	1.00946e-19
FBXL7	chr5	15500196	15939795	+	1.45594	3.59371	93.6236	3.8162e-22	1.04768e-19
ATP6V1G2	chr6	31544462	31548427	-	1.79246	-0.94979	93.5892	3.8831e-22	1.05559e-19
EFEMP1	chr2	55865967	55924139	-	1.98465	6.10818	93.4911	4.08027e-22	1.09843e-19
MRVI1	chr11	10573091	10693988	-	1.91401	5.78079	93.0972	4.97882e-22	1.32408e-19
CALD1	chr7	134744252	134970728	+	1.96191	9.15744	93.0833	5.014e-22	1.32408e-19
AOC3	chr17	42851184	42858130	+	2.15743	5.92542	92.8498	5.64169e-22	1.47578e-19
FLNA	chrX	154348524	154374638	-	2.09869	10.9289	92.804	5.77373e-22	1.4962e-19
SYNPO2	chr4	118850688	119061247	+	3.37948	8.42056	92.7536	5.92273e-22	1.52061e-19
MAPK10	chr4	86015123	86594131	-	1.88491	2.09005	92.5286	6.63582e-22	1.68806e-19
PPP1R12B	chr1	202348699	202592706	+	2.38317	7.76435	92.4436	6.92696e-22	1.74494e-19
RASGRP2	chr11	64726911	64745456	-	1.91719	2.59755	92.427	6.98529e-22	1.74494e-19
LINC00578	chr3	177441921	177752305	+	2.14641	-0.164334	92.3952	7.09844e-22	1.75737e-19
TUBA1A	chr12	49184796	49189324	-	1.56827	6.97676	92.2962	7.46271e-22	1.8312e-19
SLC8A1	chr2	40097270	40611053	-	1.4699	4.06872	92.1275	8.12695e-22	1.9767e-19
COLEC12	chr18	316740	500722	-	1.89296	3.37452	92.1024	8.23055e-22	1.98304e-19
TGFB1I1	chr16	31471585	31477960	+	1.66635	5.80499	92.0867	8.29603e-22	1.98304e-19
FXYD1	chr19	35138808	35143109	+	2.51079	1.98728	91.9815	8.7492e-22	2.07349e-19
KANK2	chr19	11164267	11197791	-	1.4993	6.43918	91.845	9.37404e-22	2.20274e-19
RNF150	chr4	140859807	141212877	-	2.38206	3.98829	91.8104	9.5392e-22	2.22271e-19
RFTN1	chr3	16313574	16514026	-	1.28029	4.98745	91.6685	1.02485e-21	2.36808e-19
FCRLA	chr1	161706972	161714352	+	3.10285	2.30452	91.3937	1.17754e-21	2.68021e-19
TNS1	chr2	217799789	218002995	-	2.11236	8.47279	91.3908	1.17926e-21	2.68021e-19
GHR	chr5	42423777	42721878	+	1.99248	1.96091	91.2441	1.26999e-21	2.86296e-19
LY86	chr6	6588108	6654983	+	1.6137	2.3063	90.9954	1.44009e-21	3.22023e-19
FLRT2	chr14	85530144	85654426	+	2.03413	3.91177	90.9126	1.50161e-21	3.33093e-19
ANGPTL1	chr1	178849705	178871052	-	3.0436	2.98664	90.8681	1.53573e-21	3.3643e-19
RUNX1T1	chr8	91954967	92103286	-	1.86904	2.95427	90.8615	1.54092e-21	3.3643e-19
CILP	chr15	65194758	65211488	-	3.02904	3.95728	90.6938	1.67721e-21	3.63325e-19
CASQ1	chr1	160190556	160201886	+	3.07085	-0.8879	90.6316	1.73077e-21	3.72022e-19
FABP4	chr8	81478419	81483263	-	3.08868	2.43847	90.5791	1.77726e-21	3.79076e-19
PKHD1L1	chr8	109362477	109530330	+	2.64599	0.184064	90.5398	1.81293e-21	3.8242e-19
TPM1	chr15	63042632	63071915	+	1.58262	8.20361	90.5315	1.82052e-21	3.8242e-19
FLNC	chr7	128830377	128859274	+	3.1571	7.96746	90.4655	1.88233e-21	3.92431e-19
CNN1	chr19	11538717	11550323	+	3.42805	8.14096	90.4446	1.90229e-21	3.93631e-19
MOB3A	chr19	2071038	2096673	-	0.925689	5.86832	90.3895	1.956e-21	4.01747e-19
PABPC5	chrX	91434595	91438584	+	1.66392	-0.498546	90.2307	2.11948e-21	4.32124e-19
PGM5	chr9	68328308	68531061	+	2.97253	5.17555	90.1313	2.22864e-21	4.51064e-19
DTX1	chr12	113056709	113098028	+	1.76033	3.19157	90.1054	2.25803e-21	4.537e-19
RP11-554A11.4	chr11	69000765	69002048	-	2.50453	0.0766869	90.0228	2.35432e-21	4.69644e-19
EBF1	chr5	158695916	159099761	-	1.56519	3.43265	89.9806	2.40509e-21	4.76344e-19
SSC5D	chr19	55488404	55519098	+	2.10052	4.74811	89.8782	2.53288e-21	4.98096e-19
NFASC	chr1	204828651	205022822	+	2.21492	4.72212	89.7216	2.74147e-21	5.35321e-19
ZEB2	chr2	144384081	144524583	-	1.29358	5.30325	89.5555	2.9815e-21	5.78119e-19
PODN	chr1	53062052	53085502	+	1.91586	5.8068	88.9027	4.14707e-21	7.98541e-19
CCDC69	chr5	151181052	151224145	-	1.72917	5.24335	88.8707	4.21471e-21	8.05969e-19
SYNE1	chr6	152121684	152637801	-	1.60913	5.54036	88.7789	4.415e-21	8.38487e-19
RAB23	chr6	57186992	57222314	-	1.58953	4.82314	88.5049	5.07082e-21	9.56487e-19
ARHGEF25	chr12	57610180	57619379	+	1.92809	3.43763	88.4671	5.16865e-21	9.68353e-19
WNT2B	chr1	112466541	112530165	+	1.69046	3.78806	88.4248	5.28044e-21	9.82658e-19
MILR1	chr17	64449037	64468643	+	1.41771	1.5826	88.3144	5.58343e-21	1.02587e-18
FNBP1	chr9	129887187	130043194	-	1.58255	5.80286	88.3133	5.58665e-21	1.02587e-18
AC007879.7	chr2	207239650	207245887	+	3.36576	-0.707455	88.2102	5.88549e-21	1.07364e-18
SRPX	chrX	38149336	38220924	-	2.06047	3.25505	88.0714	6.31344e-21	1.14418e-18
EML1	chr14	99737693	99942060	+	1.69148	4.35392	88.0275	6.45496e-21	1.16223e-18
GSTM5	chr1	109712255	109775428	+	1.98191	1.41597	88.003	6.53539e-21	1.16912e-18
LAYN	chr11	111540280	111561745	+	1.61849	2.66874	87.9418	6.74091e-21	1.19815e-18
DCLK1	chr13	35768652	36131306	-	2.30315	3.02209	87.918	6.82253e-21	1.20494e-18
MAP1A	chr15	43510958	43531620	+	1.67209	4.98489	87.8907	6.91742e-21	1.21396e-18
VSTM4	chr10	49014245	49115509	-	1.57291	3.73053	87.8679	6.99768e-21	1.21999e-18
KCNN3	chr1	154697455	154870280	-	1.67049	3.55904	87.856	7.03976e-21	1.21999e-18
ADAM33	chr20	3667965	3682246	-	2.40913	2.86735	87.8163	7.18236e-21	1.23697e-18
FILIP1	chr6	75291859	75493738	-	2.10552	3.7778	87.7929	7.26789e-21	1.24398e-18
TMEM47	chrX	34627064	34657288	-	1.54231	4.85967	87.7669	7.36404e-21	1.2527e-18
LMOD1	chr1	201896452	201946588	-	2.83149	6.52546	87.4478	8.65318e-21	1.46302e-18
DCLK2	chr4	150078274	150257457	+	1.80419	2.08082	87.3743	8.98119e-21	1.50928e-18
DMGDH	chr5	78997606	79236038	-	1.72189	-1.0082	87.2872	9.38521e-21	1.56767e-18
AP000892.6	chr11	117204967	117210292	+	2.30936	5.79478	87.1758	9.92898e-21	1.64857e-18
WI2-1896O14.1	chr1	149197992	149321732	-	1.70881	0.451955	86.8219	1.18745e-20	1.95985e-18
SCN2B	chr11	118161951	118176673	-	2.79267	-0.636471	86.7824	1.21142e-20	1.98759e-18
MEF2C-AS1	chr5	88883328	89466398	+	2.13569	-2.03574	86.7258	1.24658e-20	2.03324e-18
CDO1	chr5	115804733	115816954	-	2.32072	0.386705	86.3797	1.48505e-20	2.40804e-18
GPRASP1	chrX	102651366	102659083	+	1.92067	2.56169	86.3674	1.49432e-20	2.40898e-18
C8orf46	chr8	66460003	66518524	+	2.75003	-1.05435	86.2612	1.57669e-20	2.52707e-18
SVEP1	chr9	110365251	110579880	-	1.90238	4.42332	86.2031	1.62376e-20	2.58757e-18
SERPINF1	chr17	1761959	1777574	+	1.60521	6.2759	86.091	1.71844e-20	2.72279e-18
PLEKHO1	chr1	150149183	150164720	+	1.36911	5.08266	85.7402	2.05199e-20	3.22283e-18
PCED1B-AS1	chr12	47205898	47216456	-	1.59601	2.50091	85.7351	2.05728e-20	3.22283e-18
KCNMA1	chr10	76869601	77638595	-	2.75718	5.69965	85.641	2.15759e-20	3.361e-18
CFH	chr1	196651878	196747504	+	1.52798	6.04235	85.4909	2.32776e-20	3.60581e-18
LSAMP	chr3	115802363	117139389	-	1.70243	3.8705	85.2306	2.65515e-20	4.09011e-18
JAM3	chr11	134068925	134152001	+	1.46885	4.73625	85.1463	2.77085e-20	4.24476e-18
PLAC9	chr10	80131682	80145359	+	1.68653	1.51224	85.1336	2.78868e-20	4.2486e-18
PLD4	chr14	104924816	104937790	+	2.17991	2.22499	85.0326	2.93485e-20	4.44687e-18
CCDC136	chr7	128790757	128822132	+	2.4706	2.3098	84.9262	3.09708e-20	4.66717e-18
RP11-394O4.5	chr5	149430286	149432834	+	2.58193	3.68174	84.9098	3.12289e-20	4.68062e-18
BVES	chr6	105096822	105137174	-	2.20046	3.06271	84.8153	3.27574e-20	4.88332e-18
CPXM2	chr10	123706207	123940267	-	2.28116	4.85187	84.7491	3.38736e-20	5.02271e-18
C14orf132	chr14	96039324	96094080	+	1.98335	4.00877	84.6919	3.48668e-20	5.14248e-18
ENOX1	chr13	43213518	43786908	-	1.58772	1.2616	84.5338	3.77709e-20	5.54134e-18
TCEAL5	chrX	103273691	103276872	-	3.02061	-2.51538	84.5114	3.82005e-20	5.57486e-18
CD22	chr19	35319261	35347355	+	2.60431	3.43268	84.2439	4.37351e-20	6.34915e-18
MPDZ	chr9	13105704	13279590	-	1.60948	3.90444	84.2034	4.46411e-20	6.44692e-18
LRRC7	chr1	69568398	70151945	+	2.22082	-0.606884	84.1754	4.52768e-20	6.4818e-18
PRICKLE2	chr3	64093867	64445476	-	1.81499	4.3739	84.1722	4.53502e-20	6.4818e-18
NEGR1	chr1	71395940	72282734	-	2.15192	3.60467	84.1401	4.60928e-20	6.55416e-18
SETBP1	chr18	44680173	45068510	+	1.76142	4.0153	83.9445	5.08872e-20	7.19898e-18
GIT2	chr12	109929792	109996389	-	0.6441	5.52277	83.6574	5.88402e-20	8.26523e-18
PABPC4L	chr4	134196333	134201748	-	1.53148	0.531189	83.6513	5.90203e-20	8.26523e-18
HSPB7	chr1	16014028	16019594	-	3.0483	5.01571	83.5452	6.22758e-20	8.6773e-18
KCNT2	chr1	196225779	196609225	-	1.74503	0.23847	83.5335	6.26438e-20	8.68494e-18
TCF21	chr6	133889138	133895553	+	1.50608	3.16449	83.407	6.67856e-20	9.21309e-18
MFAP5	chr12	8637346	8662888	-	2.06415	4.2779	83.0799	7.88015e-20	1.08169e-17
ZEB1	chr10	31318495	31529814	+	1.48593	5.54672	83.0668	7.93263e-20	1.08353e-17
OLFML1	chr11	7485388	7511377	+	1.28534	3.26452	83.038	8.04912e-20	1.09405e-17
PKD2	chr4	88007668	88077777	+	1.16032	4.75125	82.922	8.53564e-20	1.15452e-17
SORBS1	chr10	95311771	95561414	-	2.2833	7.13043	82.8724	8.75262e-20	1.17812e-17
PRELP	chr1	203475828	203491352	+	2.48234	5.89366	82.743	9.34449e-20	1.25171e-17
AKT3	chr1	243488233	243851079	-	1.40871	4.80489	82.6775	9.65939e-20	1.28767e-17
POU6F1	chr12	51186936	51217693	-	1.23331	2.33468	82.3983	1.11249e-19	1.47594e-17
PDE1A	chr2	182140036	182523192	-	1.53205	2.69836	82.2752	1.18399e-19	1.56332e-17
DDR2	chr1	162631373	162787400	+	1.67233	5.80929	82.0921	1.29888e-19	1.70689e-17
DPYSL3	chr5	147390811	147510056	-	1.8866	7.37279	81.8556	1.46403e-19	1.91485e-17
CORO2B	chr15	68578969	68727806	+	1.89196	1.26966	81.7618	1.53516e-19	1.99845e-17
MIR143HG	chr5	149406689	149428678	+	2.52424	3.86402	81.6959	1.58723e-19	2.05658e-17
LYL1	chr19	13099033	13103161	-	1.36525	2.30157	81.6649	1.61229e-19	2.07932e-17
IFFO1	chr12	6538375	6556083	-	1.0757	2.62605	81.6372	1.63506e-19	2.09894e-17
KCNQ5	chr6	72621792	73198851	+	2.1663	-0.363001	81.5798	1.68328e-19	2.15088e-17
CDC42EP3	chr2	37641882	37738468	-	1.51717	5.29255	81.5291	1.72699e-19	2.19531e-17
C10orf128	chr10	49154725	49188585	-	1.26087	2.1143	81.5212	1.73389e-19	2.19531e-17
EPM2A	chr6	145501583	145736024	-	1.2774	2.23285	81.4407	1.80599e-19	2.27621e-17
RP4-621F18.2	chr1	85482281	85578250	-	1.60934	-1.25867	81.3471	1.89362e-19	2.37585e-17
SERPINA9	chr14	94462717	94479689	-	5.17284	2.27437	81.3314	1.90871e-19	2.384e-17
RP11-588K22.2	chr4	155734448	155737062	+	1.60028	4.01277	81.2296	2.00963e-19	2.49879e-17
ST6GALNAC6	chr9	127885321	127905408	-	1.03869	4.40628	81.1409	2.1019e-19	2.60185e-17
FBLN5	chr14	91869412	91947987	-	1.5176	5.44324	80.9989	2.25838e-19	2.78312e-17
FILIP1L	chr3	99830141	100114513	-	1.35034	6.45658	80.8545	2.42959e-19	2.98087e-17
LINC00891	chrX	71697196	71706455	+	1.92097	0.50756	80.8353	2.45335e-19	2.99676e-17
PDE1C	chr7	31751179	32299329	-	1.72086	2.08287	80.8211	2.471e-19	3.00508e-17
MAP6	chr11	75586918	75669120	-	1.95685	2.14688	80.7186	2.60256e-19	3.15125e-17
NDN	chr15	23685400	23687330	-	1.5708	3.74226	80.5958	2.76953e-19	3.33884e-17
FAM49A	chr2	16549459	16666331	-	1.32506	3.25892	80.4516	2.97916e-19	3.57265e-17
INMT	chr7	30697985	30757602	+	1.91056	3.08283	80.4449	2.98924e-19	3.57265e-17
RP11-330H6.5	chr3	52221081	52231190	-	2.31633	1.45192	80.3176	3.18822e-19	3.79412e-17
RP11-456K23.1	chr18	44676927	44679717	-	1.67602	-1.09184	80.2719	3.26274e-19	3.86621e-17
RANBP3L	chr5	36248434	36302114	-	2.26604	-1.72582	80.1685	3.43802e-19	4.05657e-17
COX7A1	chr19	36150922	36152869	-	1.51469	2.14256	80.1333	3.49989e-19	4.11207e-17
PSD	chr10	102402617	102421539	-	2.45153	3.56214	80.1183	3.52654e-19	4.1259e-17
KCNA5	chr12	5043989	5046788	+	2.20535	0.324931	79.9831	3.77618e-19	4.39941e-17
PDZD4	chrX	153802166	153830565	-	2.3504	1.73733	79.9287	3.88166e-19	4.50338e-17
TPM2	chr9	35681992	35691020	-	2.15892	7.99974	79.7957	4.15185e-19	4.79678e-17
PRKCB	chr16	23836001	24220611	+	1.83147	4.43353	79.7811	4.18271e-19	4.81237e-17
PI16	chr6	36948263	36964837	+	3.03563	2.49466	79.6885	4.38343e-19	5.02247e-17
CD1C	chr1	158289786	158293630	+	2.05267	0.924312	79.584	4.62152e-19	5.26543e-17
GNG2	chr14	51826195	51979342	+	1.19952	4.10918	79.5789	4.63346e-19	5.26543e-17
HSPB6	chr19	35754568	35758079	-	3.14706	7.64274	79.5547	4.69055e-19	5.30856e-17
FSTL1	chr3	120392293	120451253	-	1.23688	7.98253	79.5213	4.77047e-19	5.36167e-17
ESR1	chr6	151656691	152129619	+	1.63738	0.929629	79.519	4.77616e-19	5.36167e-17
RP11-736K20.4	chr11	86908990	86912238	-	1.7082	0.270755	79.4264	5.00534e-19	5.59629e-17
ATP2B4	chr1	203626561	203744081	+	1.46765	7.39584	79.4126	5.04049e-19	5.61296e-17
FGF7	chr15	49423096	49488775	+	1.90381	4.28779	79.3943	5.08731e-19	5.64243e-17
PLXDC2	chr10	19816239	20289856	+	1.41506	6.11752	79.3687	5.15357e-19	5.67683e-17
SLC9A9	chr3	143265222	143848531	-	1.38627	2.43722	79.3658	5.16127e-19	5.67683e-17
ANGPTL7	chr1	11189341	11195981	+	2.71364	-0.56327	79.3587	5.17974e-19	5.67683e-17
LINC01140	chr1	87129765	87169198	+	2.00437	1.05759	79.0517	6.05062e-19	6.60518e-17
MEOX2	chr7	15611212	15686812	-	2.36113	1.45036	79.0283	6.12276e-19	6.65772e-17
SLIT2	chr4	20253260	20620561	+	2.11357	3.61462	78.916	6.48093e-19	7.01966e-17
PIRT	chr17	10822475	10838445	-	2.82605	-1.3413	78.8492	6.70356e-19	7.23254e-17
SYT11	chr1	155859509	155885199	+	1.378	4.40742	78.7406	7.08252e-19	7.58743e-17
PDZRN4	chr12	41188448	41574590	+	3.11479	1.69534	78.7393	7.08722e-19	7.58743e-17
NR2F1-AS1	chr5	93409359	93585648	-	1.55619	1.50172	78.6362	7.46692e-19	7.96319e-17
RBPMS2	chr15	64739892	64775587	-	2.43431	3.92484	78.2567	9.04853e-19	9.61294e-17
ITIH5	chr10	7559270	7666998	-	1.78083	4.75271	78.2101	9.26424e-19	9.76772e-17
PDLIM7	chr5	177483394	177497606	-	1.34436	6.46554	78.21	9.26468e-19	9.76772e-17
FAM129A	chr1	184790724	184974550	-	1.92636	6.26342	78.1414	9.59201e-19	1.00745e-16
ECM2	chr9	92493554	92536655	-	1.31399	3.30754	78.1328	9.63409e-19	1.00762e-16
FLI1	chr11	128686535	128813267	+	1.15926	3.81189	78.1262	9.66627e-19	1.00762e-16
DOK3	chr5	177501907	177511274	-	1.31572	3.64776	78.0486	1.00534e-18	1.04025e-16
LRMP	chr12	25021002	25108334	+	2.1194	2.79722	78.0485	1.00543e-18	1.04025e-16
S1PR2	chr19	10221435	10231272	-	1.13534	3.08722	77.9398	1.06228e-18	1.09497e-16
MAP1B	chr5	72107234	72209570	+	1.70409	6.15779	77.7757	1.15433e-18	1.18545e-16
RP11-307E17.8	chr9	94332476	94360948	+	1.21591	-0.886589	77.7563	1.1657e-18	1.19271e-16
ATP1A2	chr1	160115759	160143591	+	3.17627	3.24882	77.7324	1.1799e-18	1.20281e-16
PARVA	chr11	12377185	12530801	+	0.993759	6.46112	77.6084	1.25636e-18	1.27605e-16
ASPN	chr9	92456205	92482506	-	1.83591	5.80174	77.5452	1.29718e-18	1.3127e-16
C1QTNF2	chr5	160347751	160370641	-	1.56161	0.475617	77.5072	1.32237e-18	1.3307e-16
RP11-6O2.3	chr15	99139317	99145370	+	2.65828	0.705132	77.504	1.32455e-18	1.3307e-16
TGFB3	chr14	75958099	75982991	-	1.57864	3.71012	77.4615	1.35334e-18	1.35471e-16
TWIST2	chr2	238848032	238910543	+	1.80231	1.86191	77.2844	1.48029e-18	1.47646e-16
JPH2	chr20	44111695	44187578	-	2.58986	4.3071	77.2545	1.50288e-18	1.49232e-16
ACTG2	chr2	73892314	73919865	+	3.33133	9.76963	77.2492	1.50696e-18	1.49232e-16
SNX29P2	chr16	29291220	29372110	+	1.98906	1.1902	77.1387	1.59365e-18	1.57256e-16
C15orf59	chr15	73735431	73752747	-	1.9755	1.10222	76.9919	1.71658e-18	1.68785e-16
RAB9B	chrX	103822322	103832228	-	1.97907	1.14263	76.9249	1.77583e-18	1.73974e-16
MIR99AHG	chr21	16070522	16627397	+	2.03111	0.744713	76.9182	1.7819e-18	1.73974e-16
CSDC2	chr22	41560763	41577741	+	1.81478	1.17503	76.88	1.81664e-18	1.76744e-16
CACNB2	chr10	18140677	18541869	+	1.84828	1.94692	76.8353	1.8583e-18	1.80165e-16
PTGIS	chr20	49503874	49568146	-	2.42379	5.52246	76.726	1.96396e-18	1.89744e-16
DPT	chr1	168695459	168729264	-	2.4012	2.90731	76.6449	2.04634e-18	1.96783e-16
RGS13	chr1	192636138	192660306	+	2.81898	1.55836	76.6404	2.051e-18	1.96783e-16
RGMA	chr15	93035273	93089204	-	2.52486	5.48062	76.602	2.09127e-18	1.99955e-16
PRICKLE1	chr12	42456754	42590355	-	1.60351	2.92572	76.5807	2.11397e-18	2.0143e-16
ARHGEF6	chrX	136665547	136782088	-	1.17876	4.11802	76.5702	2.12518e-18	2.01805e-16
MDFIC	chr7	114922154	115019916	+	1.11556	4.59015	76.4759	2.22918e-18	2.10958e-16
ANXA6	chr5	151100712	151157882	-	1.27437	6.46985	76.4416	2.26824e-18	2.13924e-16
TMEM35	chrX	101078720	101096364	+	2.76839	0.835967	76.3869	2.33193e-18	2.19186e-16
RP11-358D17.2	chr4	119042024	119043937	+	2.69323	-1.06457	76.276	2.46669e-18	2.31069e-16
SERTM1	chr13	36673912	36697839	+	4.08261	-3.00757	76.2402	2.5117e-18	2.34203e-16
FGF10	chr5	44303544	44389706	-	2.49605	1.23579	76.2361	2.51704e-18	2.34203e-16
C8orf88	chr8	90958637	90985257	-	2.42508	0.899256	76.2264	2.52941e-18	2.34567e-16
SLC5A7	chr2	107986523	108013994	+	3.69829	-1.43813	76.177	2.59347e-18	2.39706e-16
LRRN4CL	chr11	62686402	62689899	-	1.72318	1.80164	76.0197	2.80851e-18	2.58719e-16
HSPB2-C11orf52	chr11	111912736	111926871	+	1.77887	0.539868	75.9314	2.93691e-18	2.69651e-16
SVIL	chr10	29457338	29736781	-	1.67849	7.13374	75.8759	3.02071e-18	2.7643e-16
RHOJ	chr14	63204114	63293219	+	1.23738	3.74233	75.7135	3.27951e-18	2.99125e-16
C7	chr5	40909252	40982939	+	3.13002	5.80772	75.6662	3.35901e-18	3.05373e-16
CLEC3B	chr3	45001548	45036071	+	1.73744	2.69122	75.5102	3.63526e-18	3.29407e-16
SMTN	chr22	31064105	31104757	+	1.67685	7.21828	75.4009	3.84219e-18	3.47023e-16
ARHGAP20	chr11	110577042	110713189	-	1.62709	1.28584	75.3327	3.97723e-18	3.58054e-16
PRKAR2B	chr7	107044649	107161811	+	1.62589	3.57633	75.261	4.12434e-18	3.7007e-16
PTGER3	chr1	70852353	71047808	-	1.79311	2.85259	75.2547	4.13739e-18	3.7007e-16
CALHM2	chr10	103446786	103452402	-	1.07352	3.66599	75.133	4.4005e-18	3.92338e-16
GGTA1P	chr9	121444991	121500027	-	1.39459	1.88669	75.049	4.59187e-18	4.08088e-16
SCN4B	chr11	118133377	118152888	-	1.7871	1.84647	74.9783	4.75927e-18	4.21614e-16
CYP1B1	chr2	38066973	38109902	-	2.157	5.01265	74.8997	4.95252e-18	4.36395e-16
ATP8B2	chr1	154325553	154351307	+	1.31262	4.78133	74.8976	4.9576e-18	4.36395e-16
PDE7B	chr6	135851696	136195574	+	1.82092	2.37782	74.8556	5.0642e-18	4.44367e-16
DNM3OS	chr1	172136531	172144794	-	1.36208	1.20522	74.8157	5.16781e-18	4.52028e-16
KERA	chr12	91050491	91057983	-	2.88405	-1.27837	74.7902	5.23495e-18	4.56046e-16
PLN	chr6	118548298	118560730	+	2.69006	4.43802	74.7858	5.24663e-18	4.56046e-16
MAMDC2	chr9	70043581	70226970	+	2.54931	2.32911	74.7228	5.41664e-18	4.69352e-16
EMP3	chr19	48321509	48330553	+	1.26129	4.67046	74.5454	5.92583e-18	5.1139e-16
FAM129C	chr19	17523301	17553839	+	2.81681	1.0304	74.5412	5.93868e-18	5.1139e-16
TNFSF12	chr17	7548891	7557890	+	1.17899	4.05607	74.5268	5.98219e-18	5.13543e-16
WIPF1	chr2	174559572	174682916	-	1.13613	6.01106	74.4605	6.1863e-18	5.29425e-16
GLIPR2	chr9	36136536	36163913	+	1.1854	3.91829	74.3801	6.44343e-18	5.49733e-16
COL6A6	chr3	130560334	130678155	+	2.68659	-0.273654	74.3664	6.4885e-18	5.51881e-16
SCN7A	chr2	166403573	166494247	-	2.97138	1.8256	74.3336	6.59714e-18	5.59406e-16
ABCA9	chr17	68974488	69061064	-	2.00652	1.62421	74.3011	6.70649e-18	5.66943e-16
LPP	chr3	188153284	188890671	+	1.3647	8.71859	74.1733	7.1553e-18	6.03046e-16
PTRF	chr17	42402452	42423517	-	1.39747	7.44973	74.1283	7.32025e-18	6.14062e-16
GUCY1A3	chr4	155666711	155732349	+	1.60432	5.0748	74.1256	7.33029e-18	6.14062e-16
BCL2	chr18	63123346	63320128	-	1.21427	3.58024	74.0372	7.6658e-18	6.40233e-16
LAMA2	chr6	128883141	129516569	+	1.59813	4.47975	74.0178	7.74141e-18	6.44606e-16
PRKG1	chr10	50991358	52298350	+	1.36766	3.60779	73.8959	8.23492e-18	6.83646e-16
PCDHGA12	chr5	141430589	141512979	+	1.39772	2.3399	73.809	8.60517e-18	7.12251e-16
IGHV5-78	chr14	106851123	106851417	-	2.89743	-2.37485	73.7389	8.91661e-18	7.35833e-16
BTK	chrX	101349447	101390796	-	1.50782	2.55485	73.404	1.05652e-17	8.69291e-16
RP5-1172A22.1	chr22	27221349	27224727	-	2.26422	-2.0998	73.3534	1.08395e-17	8.89226e-16
ITPR1	chr3	4493348	4847840	+	1.20177	4.59896	73.3258	1.09919e-17	8.99067e-16
CLIC4	chr1	24745357	24844324	+	1.14446	7.34887	73.2244	1.15714e-17	9.43682e-16
FOXF1	chr16	86510527	86515418	+	1.51898	4.77273	73.1902	1.17737e-17	9.57367e-16
CTD-2314G24.2	chr5	51372736	51383332	-	2.00813	1.27547	73.1518	1.2005e-17	9.73318e-16
RCSD1	chr1	167630093	167706249	+	1.29486	3.68517	73.0556	1.26048e-17	1.01856e-15
CTB-133G6.1	chr19	7348943	7383385	+	2.65029	0.46694	73.0506	1.26365e-17	1.01856e-15
FAT4	chr4	125316399	125492932	+	1.47751	4.2724	73.0296	1.2772e-17	1.0265e-15
NAPSB	chr19	50333796	50344767	-	1.79636	2.36595	73.0159	1.28608e-17	1.03064e-15
KRT8P47	chr1	44103306	44104703	-	2.23994	-1.42995	72.9932	1.30098e-17	1.03959e-15
PCDH9	chr13	66302834	67230445	-	2.51642	1.98556	72.9004	1.3636e-17	1.08649e-15
ADH1B	chr4	99304964	99321401	-	2.81195	4.58017	72.8884	1.37191e-17	1.08998e-15
ABCA8	chr17	68867292	68955392	-	2.3711	3.18287	72.875	1.38126e-17	1.09428e-15
LHFP	chr13	39342892	39603528	-	1.33372	4.66176	72.8619	1.3905e-17	1.09845e-15
TNFRSF13C	chr22	41922023	41926818	-	2.1947	2.75697	72.8303	1.41289e-17	1.11297e-15
DMPK	chr19	45769717	45782552	-	1.5692	5.20887	72.7906	1.44162e-17	1.13239e-15
IQCJ-SCHIP1	chr3	158962235	159897366	+	1.3514	2.95786	72.7542	1.46845e-17	1.1502e-15
STAP1	chr4	67558728	67607337	+	2.17146	0.302935	72.7208	1.49353e-17	1.16655e-15
LTBP1	chr2	32946972	33399509	+	1.36553	6.52798	72.6465	1.55083e-17	1.20791e-15
CD37	chr19	49335171	49343335	+	1.69407	5.08411	72.5789	1.60484e-17	1.24647e-15
AXL	chr19	41219203	41261766	+	1.24712	5.81438	72.1226	2.02229e-17	1.5629e-15
TRIM55	chr8	66126896	66175487	+	2.73367	-2.38926	72.1214	2.02352e-17	1.5629e-15
PRUNE2	chr9	76611376	76906087	-	2.69539	6.39568	71.9725	2.18221e-17	1.68079e-15
ADAMTS9-AS2	chr3	64684909	65011468	+	2.03975	-0.192515	71.9173	2.24406e-17	1.72364e-15
GLT8D2	chr12	103988984	104064183	-	1.2834	3.185	71.8626	2.30716e-17	1.76721e-15
MMRN1	chr4	89879532	89954629	+	1.95973	2.75706	71.8321	2.34306e-17	1.78976e-15
PLIN4	chr19	4502180	4518465	-	2.95873	4.58501	71.7808	2.4048e-17	1.83188e-15
CELF2	chr10	11005321	11336675	+	1.46101	5.01118	71.724	2.47504e-17	1.88022e-15
ITGA7	chr12	55684568	55716043	-	1.85047	4.7242	71.6185	2.61094e-17	1.97804e-15
FXYD6	chr11	117820075	117877486	-	1.69714	4.50611	71.6004	2.63508e-17	1.98807e-15
TXLNB	chr6	139240061	139292139	-	1.66341	0.521924	71.5978	2.63853e-17	1.98807e-15
ARMCX1	chrX	101550531	101554700	+	1.39892	2.48382	71.5312	2.72906e-17	2.05072e-15
MS4A4E	chr11	60201253	60243088	-	1.72358	-2.59562	71.483	2.79664e-17	2.09582e-15
METTL24	chr6	110245928	110358272	-	2.38456	0.406814	71.3942	2.92527e-17	2.1863e-15
RERG	chr12	15107783	15348675	-	1.90235	3.10518	71.3204	3.03685e-17	2.2636e-15
ARHGAP15	chr2	143091362	143768352	+	1.28353	2.57314	71.1888	3.24618e-17	2.41314e-15
THBS4	chr5	79991311	80083287	+	3.04994	5.88222	71.1209	3.35984e-17	2.49095e-15
SLC2A4	chr17	7281667	7288257	+	2.40319	2.82274	71.0886	3.41532e-17	2.52533e-15
NKAPL	chr6	28259320	28260958	+	1.69337	-1.62235	71.0646	3.45713e-17	2.54945e-15
FGF1	chr5	142592178	142698070	-	1.30773	0.77283	71.0017	3.5691e-17	2.62504e-15
EMILIN1	chr2	27078567	27086408	+	1.39077	6.82202	70.9484	3.66697e-17	2.68989e-15
HSPB2	chr11	111912242	111914093	+	1.59437	-0.266901	70.9233	3.71391e-17	2.71504e-15
QKI	chr6	163414000	163578596	+	0.93262	5.7738	70.9196	3.72085e-17	2.71504e-15
ZNF582-AS1	chr19	56393656	56399172	+	1.5986	-1.31436	70.8798	3.79661e-17	2.76305e-15
CD52	chr1	26317957	26320523	+	1.65053	4.32311	70.7876	3.97821e-17	2.88764e-15
HTR7	chr10	90740823	90857698	-	1.65539	-1.29563	70.6351	4.29809e-17	3.11168e-15
DZIP1	chr13	95578202	95644703	-	1.39791	2.92495	70.5912	4.39469e-17	3.17333e-15
C1orf95	chr1	226548800	226609214	+	2.60656	2.04684	70.5805	4.41866e-17	3.18236e-15
TMEM100	chr17	55719627	55732121	-	2.29562	1.48046	70.569	4.44442e-17	3.19261e-15
HAS1	chr19	51713112	51723994	-	2.62923	0.310103	70.5452	4.49847e-17	3.22309e-15
TXNDC15	chr5	134873803	134901525	+	0.611347	4.91089	70.3843	4.88075e-17	3.48798e-15
VIM	chr10	17228259	17237593	+	1.06528	9.19107	70.3511	4.96363e-17	3.53809e-15
ADAMTS16	chr5	5140330	5320304	+	2.34519	1.16419	70.2906	5.11809e-17	3.63883e-15
FCGR2C	chr1	161581339	161605662	+	1.5799	1.4723	70.2837	5.13605e-17	3.64193e-15
CNTN4	chr3	2098813	3057956	+	1.46025	2.37034	70.2788	5.14872e-17	3.64193e-15
ZNF385D	chr3	21415071	22373321	-	1.81025	1.22001	70.2284	5.28202e-17	3.72671e-15
LRCH2	chrX	115110616	115234072	-	1.41313	1.45729	70.1646	5.45565e-17	3.83039e-15
RP11-276H19.1	chr9	86948699	87002033	+	2.34607	-1.9978	70.1643	5.4566e-17	3.83039e-15
NECAB1	chr8	90791550	90959408	+	2.1377	1.37482	70.1419	5.51894e-17	3.86437e-15
HVCN1	chr12	110627841	110704950	-	1.29467	2.83729	70.135	5.5381e-17	3.86802e-15
CTD-2089N3.1	chr5	50965687	50967008	-	2.10793	-2.17062	70.0939	5.65482e-17	3.93962e-15
ACKR1	chr1	159203307	159206500	+	2.22774	4.03215	70.0492	5.78442e-17	4.01511e-15
MYH11	chr16	15703135	15857033	-	3.18119	11.0273	70.044	5.79955e-17	4.01511e-15
ITGA9	chr3	37452115	37823514	+	1.54504	4.7314	70.0416	5.80662e-17	4.01511e-15
RSPO1	chr1	37611350	37634923	-	2.37446	0.0238441	69.8845	6.28821e-17	4.3373e-15
RNF180	chr5	64165844	64372869	+	1.48495	1.66729	69.8657	6.3482e-17	4.36781e-15
ZDHHC15	chrX	75368427	75523502	-	1.76207	0.0745481	69.8477	6.4064e-17	4.39684e-15
LINGO3	chr19	2289784	2292024	-	1.98967	0.620408	69.8429	6.4221e-17	4.39684e-15
HMCN1	chr1	185734551	186190949	+	1.68271	4.29471	69.7468	6.74258e-17	4.60489e-15
CPE	chr4	165361194	165498320	+	1.83523	4.98941	69.7144	6.85448e-17	4.6698e-15
TMOD1	chr9	97501180	97601748	+	1.85063	3.34193	69.6789	6.97881e-17	4.74285e-15
ZNF804A	chr2	184598366	184939492	+	1.86514	0.0858367	69.6468	7.09341e-17	4.80895e-15
PABPC1P4	chr12	63822021	63823895	+	1.22035	0.0257538	69.5506	7.4479e-17	5.03696e-15
PTGDS	chr9	136977505	136985435	+	2.06509	5.33621	69.5054	7.62046e-17	5.14112e-15
FAM13C	chr10	59246129	59363181	-	1.46185	2.34733	69.4587	7.80307e-17	5.25154e-15
GIMAP1	chr7	150716557	150724284	+	1.20143	2.57341	69.3904	8.07803e-17	5.42343e-15
CXCL12	chr10	44370165	44386493	-	1.57109	5.16657	69.3822	8.11156e-17	5.43279e-15
ANKRD44	chr2	196967017	197311173	-	1.16409	3.62713	69.3501	8.24489e-17	5.50636e-15
ST3GAL3	chr1	43705824	43931165	+	1.06239	2.4352	69.3462	8.26112e-17	5.50636e-15
MIR100HG	chr11	122155422	122422871	-	2.35209	-2.48459	69.2238	8.78988e-17	5.84045e-15
AKAP6	chr14	32329273	32837681	+	2.13989	3.152	69.2206	8.80449e-17	5.84045e-15
GAS7	chr17	9910609	10198551	-	1.33664	5.15149	69.2073	8.86407e-17	5.86594e-15
HPGDS	chr4	94298535	94342876	-	1.81694	0.575371	69.1451	9.14781e-17	6.03929e-15
GUCY1B3	chr4	155758992	155807591	+	1.24943	4.45376	69.1231	9.25051e-17	6.09259e-15
ADGRD1	chr12	130953907	131141469	+	1.9309	3.12202	69.1172	9.27838e-17	6.09646e-15
ARHGDIB	chr12	14942017	14961728	-	1.11198	6.41551	68.9457	1.01212e-16	6.63453e-15
ZCCHC18	chrX	104112131	104115846	+	1.35704	-1.11949	68.934	1.01815e-16	6.6583e-15
ZNF781	chr19	37667751	37692322	-	1.43494	-0.426793	68.8961	1.03791e-16	6.77154e-15
BLK	chr8	11494001	11564604	+	2.61274	1.81317	68.8484	1.06329e-16	6.92085e-15
FRRS1L	chr9	109130293	109167291	-	3.08579	1.50709	68.8252	1.07588e-16	6.98644e-15
CPXM1	chr20	2794069	2800637	-	1.61364	4.07743	68.8177	1.07997e-16	6.99661e-15
GNB4	chr3	179396089	179451590	-	1.13132	5.18717	68.7547	1.11502e-16	7.20683e-15
RGAG4	chrX	72127110	72131901	-	1.54723	2.2592	68.6596	1.17016e-16	7.54565e-15
ADHFE1	chr8	66430185	66471601	+	1.73452	0.353983	68.6382	1.18292e-16	7.61022e-15
ITGB1BP2	chrX	71301734	71305371	+	1.55947	-0.277622	68.5733	1.22248e-16	7.84654e-15
CHRDL1	chrX	110673856	110795819	-	2.78109	3.61066	68.553	1.2351e-16	7.90923e-15
GREM2	chr1	240489573	240612149	-	2.47981	3.09115	68.5461	1.23944e-16	7.91874e-15
LIX1L	chr1	145933423	145958001	-	1.11467	4.83875	68.5259	1.25224e-16	7.98211e-15
ILK	chr11	6603708	6610874	+	0.900952	6.67487	68.4933	1.27308e-16	8.0963e-15
FOXP2	chr7	114086327	114693772	+	2.3	3.19995	68.3757	1.35131e-16	8.57419e-15
STARD9	chr15	42575659	42720981	+	1.42329	3.40272	68.3053	1.40043e-16	8.86555e-15
ZNF25	chr10	37949572	37976633	-	0.926744	3.03458	68.2372	1.44968e-16	9.15642e-15
CYSLTR1	chrX	78271464	78327691	-	1.36044	1.71487	68.2213	1.46141e-16	9.20954e-15
DMD	chrX	31097677	33339441	-	1.90498	4.71225	68.2159	1.46538e-16	9.21361e-15
ITPKB	chr1	226631690	226739323	-	1.365	5.5828	68.1609	1.50687e-16	9.44395e-15
ADAMTSL3	chr15	83654086	84039842	+	1.8405	2.71915	68.1583	1.50882e-16	9.44395e-15
SYNM	chr15	99098217	99135593	+	3.06807	7.85363	68.0902	1.56183e-16	9.74094e-15
MSN	chrX	65588377	65741931	+	0.946826	8.07782	68.0884	1.5633e-16	9.74094e-15
RGS4	chr1	163068775	163076802	+	1.91925	2.96589	68.0766	1.57269e-16	9.77748e-15
FGF2	chr4	122826708	122898236	+	1.74361	2.89581	68.0712	1.57698e-16	9.78221e-15
FOXN3	chr14	89124871	89619149	-	0.798864	6.40095	67.9679	1.66177e-16	1.02852e-14
MXRA7	chr17	76672551	76711016	-	1.3508	6.55059	67.9225	1.70048e-16	1.05013e-14
SAMD4A	chr14	54567097	54793315	+	1.26431	4.39789	67.8836	1.73434e-16	1.06698e-14
ZNF454	chr5	178941191	178966433	+	1.45982	-0.859199	67.8824	1.73546e-16	1.06698e-14
TLR10	chr4	38772239	38782990	-	2.36033	1.79912	67.8618	1.75369e-16	1.0758e-14
COPZ2	chr17	48026167	48038030	-	1.41681	2.47798	67.8296	1.78256e-16	1.0911e-14
SGCA	chr17	50164214	50175931	+	2.3191	2.11102	67.7657	1.8412e-16	1.12451e-14
IL16	chr15	81159575	81314058	+	1.39563	3.94136	67.4806	2.12766e-16	1.29661e-14
C1R	chr12	7080209	7092607	-	1.27487	7.88974	67.4253	2.18822e-16	1.33059e-14
HAND2-AS1	chr4	173527270	173591324	+	3.25489	3.01167	67.409	2.2064e-16	1.33871e-14
FAXDC2	chr5	154818491	154859252	-	1.6726	3.9317	67.2759	2.36043e-16	1.42904e-14
RP11-693J15.4	chr12	92421531	92483680	+	2.39488	-0.984643	67.2503	2.39137e-16	1.44462e-14
C20orf166-AS1	chr20	62544343	62551526	-	2.95561	-0.313502	67.1467	2.52035e-16	1.51922e-14
ANKS1B	chr12	98726457	99984654	-	1.98188	0.141826	67.0512	2.64547e-16	1.58983e-14
NPAS4	chr11	66421004	66426707	+	2.35285	-2.0026	67.0486	2.64896e-16	1.58983e-14
NRXN2	chr11	64606174	64723188	-	2.06933	2.60614	66.973	2.75246e-16	1.64839e-14
RGS9	chr17	65137431	65227703	+	1.78264	0.686252	66.9568	2.77526e-16	1.65846e-14
CTD-3035K23.7	chr17	62626437	62627590	-	1.41545	-2.12435	66.891	2.86942e-16	1.71104e-14
ARHGEF26	chr3	154121003	154257827	+	1.9303	3.23537	66.8601	2.91471e-16	1.73431e-14
FAM124A	chr13	51222334	51284241	+	1.58296	2.69434	66.822	2.97168e-16	1.76443e-14
PLIN1	chr15	89664365	89679427	-	2.78235	1.43055	66.7991	3.00635e-16	1.7812e-14
AR	chrX	67544032	67730619	+	1.8716	1.85234	66.6973	3.16565e-16	1.87158e-14
TNS2	chr12	53046969	53064372	+	1.12106	6.04976	66.6092	3.3103e-16	1.95294e-14
LUM	chr12	91102629	91111831	-	1.31504	8.69774	66.5691	3.37843e-16	1.98501e-14
CD19	chr16	28931939	28939346	+	2.20491	1.91677	66.5688	3.37899e-16	1.98501e-14
RORB	chr9	74497365	74693177	+	1.77019	0.120859	66.5429	3.42367e-16	2.00701e-14
FIBIN	chr11	26994184	26996121	+	1.40279	2.6486	66.4938	3.51005e-16	2.0533e-14
MAP3K3	chr17	63622415	63696303	+	0.736969	4.87578	66.4677	3.55668e-16	2.0762e-14
WWTR1	chr3	149517235	149736714	-	1.2483	6.55749	66.4491	3.59038e-16	2.09147e-14
PHLDB2	chr3	111732497	111976517	+	1.48178	4.69681	66.3965	3.68757e-16	2.14358e-14
LRFN5	chr14	41607570	41904549	+	1.6026	-0.57289	66.2896	3.89305e-16	2.2583e-14
PLP1	chrX	103773718	103792619	+	3.09328	1.09777	66.2528	3.96643e-16	2.29606e-14
TRIM61	chr4	164954446	164977668	-	1.50122	-1.93482	66.2426	3.9871e-16	2.30321e-14
RCVRN	chr17	9896320	9905621	-	1.63553	-2.87219	66.2246	4.02366e-16	2.3195e-14
SH3BGRL	chrX	81201943	81298547	+	1.06458	6.7188	66.13	4.2215e-16	2.4285e-14
PIP4K2A	chr10	22534849	22714555	-	0.705065	5.04926	66.0913	4.30504e-16	2.47143e-14
CLECL1	chr12	9715860	9733299	-	1.76735	-0.836072	66.0306	4.43983e-16	2.54354e-14
AC006129.2	chr19	41545192	41555462	+	1.59095	-0.827958	65.9587	4.60479e-16	2.63261e-14
PJA2	chr5	109334709	109409994	-	0.759769	6.46937	65.9027	4.73742e-16	2.70287e-14
TMEM59L	chr19	18607430	18621039	+	2.2842	0.0191238	65.8179	4.94563e-16	2.81586e-14
CAP2	chr6	17393216	17557792	+	1.75769	3.50312	65.8098	4.96616e-16	2.82176e-14
DNAJC18	chr5	139408588	139444491	-	1.01761	2.46127	65.7854	5.02781e-16	2.85094e-14
RGMB	chr5	98768650	98798643	+	1.26063	5.20479	65.7718	5.06286e-16	2.86275e-14
CNR2	chr1	23870526	23913362	-	2.51276	0.600104	65.7693	5.06928e-16	2.86275e-14
SUSD5	chr3	33150042	33219215	-	1.78035	0.847297	65.744	5.13464e-16	2.89376e-14
CRHBP	chr5	76952713	76981158	+	1.56304	-1.75961	65.6779	5.30984e-16	2.98532e-14
MICU3	chr8	17027238	17122644	+	1.46643	0.919041	65.6746	5.31862e-16	2.98532e-14
ITGA5	chr12	54395261	54419460	-	1.29766	7.20991	65.6445	5.40047e-16	3.02513e-14
PRKD1	chr14	29576479	30191898	-	1.34204	1.98882	65.5705	5.60722e-16	3.13462e-14
PCDH10	chr4	133149315	133208606	+	3.26655	1.04762	65.5545	5.6529e-16	3.1538e-14
KATNAL1	chr13	30202630	30307484	-	1.10291	3.42585	65.3646	6.22455e-16	3.46575e-14
OMD	chr9	92414245	92424461	-	2.28584	2.57406	65.3323	6.32741e-16	3.51596e-14
SLC8A1-AS1	chr2	39786453	40255209	+	1.24353	0.0503994	65.3106	6.39771e-16	3.54791e-14
CHRNA3	chr15	78593052	78621295	-	2.71905	2.14774	65.2933	6.45399e-16	3.57165e-14
HCFC2	chr12	104064457	104106524	+	0.776507	3.67329	65.2892	6.46734e-16	3.57165e-14
RP11-64B16.2	chr12	119194850	119195394	+	1.67873	-1.80314	65.2856	6.47915e-16	3.57165e-14
TLR6	chr4	38823715	38856817	-	1.31381	1.84204	65.1739	6.85715e-16	3.77252e-14
CTC-296K1.4	chr17	44794747	44797783	-	2.76274	-2.06787	65.1551	6.92294e-16	3.80117e-14
ABCC9	chr12	21797401	21941402	-	1.73411	4.1386	65.0726	7.21904e-16	3.95592e-14
GOLGA8N	chr15	32593456	32607310	+	1.14789	1.7498	65.0327	7.36654e-16	4.02879e-14
CMYA5	chr5	79689877	79800240	+	1.5156	1.33943	64.9783	7.57276e-16	4.13342e-14
LTC4S	chr5	179793980	179796647	+	1.39707	0.585354	64.9168	7.81272e-16	4.25601e-14
TACR2	chr10	69403903	69416867	-	2.94557	4.08724	64.7788	8.37972e-16	4.55594e-14
LMO3	chr12	16548373	16610594	-	1.98386	2.10135	64.7382	8.55402e-16	4.6416e-14
GNAO1	chr16	56191390	56357444	+	2.19469	4.09975	64.7221	8.62438e-16	4.67064e-14
CBX7	chr22	39120167	39152674	-	1.18275	5.01882	64.4203	1.00515e-15	5.4329e-14
MAGEH1	chrX	55452105	55453566	+	1.09773	2.82207	64.4054	1.01279e-15	5.46354e-14
NUDT10	chrX	51332231	51337525	+	2.1255	-1.11252	64.3424	1.04573e-15	5.63031e-14
SCRG1	chr4	173384701	173406380	-	2.80988	2.65607	64.2855	1.07634e-15	5.78185e-14
TIMP3	chr22	32801701	32863043	+	1.31808	7.9115	64.2802	1.07923e-15	5.78185e-14
CTC-378H22.1	chr19	42132555	42137099	+	2.07687	-2.7601	64.2751	1.08205e-15	5.78185e-14
ADAMTS1	chr21	26835747	26845409	-	1.33914	5.51985	64.2075	1.11979e-15	5.97107e-14
A2M	chr12	9067664	9116229	-	1.16953	9.38128	64.0956	1.18528e-15	6.30373e-14
AKAP2	chr9	110048598	110172512	+	0.981974	6.08431	64.0932	1.18672e-15	6.30373e-14
SCHIP1	chr3	159839861	159897360	+	1.46166	1.15429	64.0053	1.24086e-15	6.57871e-14
RP4-647J21.1	chr7	44958999	44960909	-	1.43579	0.187012	63.9903	1.25035e-15	6.61634e-14
BEND5	chr1	48727523	48776969	-	1.85357	0.191213	63.9236	1.29338e-15	6.83103e-14
PTGFR	chr1	78303884	78539749	+	1.64398	1.54507	63.8906	1.31524e-15	6.93326e-14
MS4A1	chr11	60455752	60470760	+	2.76065	4.10979	63.8485	1.34364e-15	7.06955e-14
GAS1	chr9	86944363	86947189	-	1.94005	3.86079	63.7833	1.38884e-15	7.29351e-14
VAMP1	chr12	6462237	6470987	-	0.985106	2.6276	63.7326	1.42507e-15	7.46961e-14
FAM159A	chr1	52633344	52669683	+	1.87931	0.089848	63.6645	1.47522e-15	7.71791e-14
FCRLB	chr1	161721563	161728143	+	1.79667	0.248805	63.6121	1.51494e-15	7.91077e-14
NACAD	chr7	45080438	45088914	-	1.68509	2.12511	63.5728	1.54552e-15	8.0553e-14
BEX4	chrX	103215092	103217246	+	1.40296	3.15671	63.5399	1.57152e-15	8.17544e-14
LPAR4	chrX	78747709	78757094	+	1.46229	-1.20603	63.5299	1.57954e-15	8.2018e-14
PKIG	chr20	44531785	44624247	+	1.11655	4.7974	63.4916	1.61048e-15	8.34681e-14
MAP4K1	chr19	38587641	38618882	-	1.55507	3.21607	63.4396	1.65359e-15	8.53881e-14
MEIS1	chr2	66433452	66573869	+	1.34478	4.19257	63.4395	1.65369e-15	8.53881e-14
WAS	chrX	48676596	48691427	+	1.3267	3.71007	63.4031	1.6845e-15	8.68177e-14
BAG2	chr6	57172326	57189833	+	1.51482	5.08284	63.3083	1.76755e-15	9.08527e-14
PARK2	chr6	161347420	162727771	-	1.42903	0.98017	63.3063	1.76935e-15	9.08527e-14
RP11-960L18.1	chr16	81738248	81767868	+	1.94118	-1.85012	63.275	1.7977e-15	9.21379e-14
LAMA4	chr6	112108760	112254939	-	1.01486	6.58936	63.2666	1.80535e-15	9.23595e-14
FCGR2B	chr1	161581311	161678654	+	1.44599	3.01538	63.2243	1.84458e-15	9.41924e-14
ROR2	chr9	91563091	91950162	-	1.70233	3.94251	63.2156	1.85271e-15	9.44337e-14
ARHGAP25	chr2	68679601	68826833	+	1.1939	3.55721	63.1744	1.89193e-15	9.62556e-14
HSD17B6	chr12	56752161	56787790	+	1.34636	0.727863	63.1022	1.96254e-15	9.96653e-14
KCNB1	chr20	49363877	49482647	-	2.79716	1.70873	62.9849	2.08297e-15	1.05588e-13
INAFM2	chr15	40325216	40326715	+	1.16831	1.35271	62.9755	2.09289e-15	1.05897e-13
RAP1A	chr1	111542218	111716691	+	0.637066	5.99451	62.9261	2.14614e-15	1.08394e-13
LPXN	chr11	58526871	58578220	-	1.20062	4.03461	62.8779	2.19928e-15	1.10876e-13
ITGA1	chr5	52787896	52959210	+	1.13628	6.7872	62.8259	2.25815e-15	1.13637e-13
ZNF521	chr18	25061926	25352190	-	1.19975	3.14155	62.8081	2.27859e-15	1.14458e-13
DTNA	chr18	34493290	34891844	+	2.07607	2.91434	62.7755	2.31667e-15	1.15915e-13
FAM107A	chr3	58564117	58627610	-	1.70259	2.73981	62.7749	2.31729e-15	1.15915e-13
SORCS1	chr10	106573663	107164534	-	2.62948	0.0640154	62.7725	2.32014e-15	1.15915e-13
MAB21L2	chr4	150581922	150584693	+	2.61084	0.677508	62.682	2.42928e-15	1.21149e-13
CCIN	chr9	36169394	36171334	+	1.60916	-2.34147	62.6611	2.45519e-15	1.22222e-13
GEM	chr8	94249253	94262350	-	1.22415	5.23387	62.5457	2.60334e-15	1.29364e-13
RP11-999E24.3	chr14	57993545	57994525	-	1.58895	-1.7685	62.5257	2.62995e-15	1.30453e-13
COL6A2	chr21	46098097	46132849	+	1.24836	9.11073	62.5184	2.63961e-15	1.30698e-13
RP11-805I24.3	chr16	86192793	86198913	-	1.94474	-1.17627	62.4633	2.71459e-15	1.34171e-13
BACH2	chr6	89926529	90296908	-	1.60889	2.04404	62.4108	2.78789e-15	1.37549e-13
PLXNA4	chr7	132123332	132648688	-	1.91694	3.24809	62.4058	2.79505e-15	1.37658e-13
PDE2A	chr11	72576141	72674591	-	1.43334	2.96895	62.3939	2.8119e-15	1.38242e-13
GPM6B	chrX	13771031	13938638	-	1.53523	2.26268	62.3826	2.82812e-15	1.38793e-13
AC079767.4	chr2	207662375	207667024	+	2.00146	-0.558343	62.3455	2.88185e-15	1.4118e-13
AC009299.5	chr2	161340816	161341326	-	1.69537	0.233003	62.3028	2.94501e-15	1.4402e-13
IGFBP7	chr4	57030773	57110385	-	1.10445	8.69544	62.2883	2.96687e-15	1.44834e-13
RP11-693N9.2	chr11	104901549	104919073	-	1.16978	1.07837	62.272	2.99152e-15	1.4578e-13
SHISA3	chr4	42397839	42402487	+	2.5874	2.14652	62.2457	3.0317e-15	1.47479e-13
FCRL3	chr1	157674321	157700857	-	2.04233	2.13789	62.2074	3.09118e-15	1.50014e-13
SH3BGR	chr21	39445855	39515506	+	1.52974	0.994004	62.2052	3.09463e-15	1.50014e-13
LGI4	chr19	35124513	35142451	-	1.45362	1.553	62.1742	3.14381e-15	1.52132e-13
GPR88	chr1	100538137	100542018	+	1.91725	-1.15834	62.154	3.17616e-15	1.5343e-13
AKAP12	chr6	151239999	151358557	+	1.65037	5.77099	62.1445	3.19162e-15	1.53908e-13
IL10RA	chr11	117986348	118001483	+	1.32999	4.66959	62.1391	3.20038e-15	1.54063e-13
ST8SIA1	chr12	22063773	22437041	-	1.37138	1.48258	61.9847	3.46142e-15	1.6634e-13
HEG1	chr3	124965710	125055958	-	1.02839	6.33273	61.9572	3.50996e-15	1.68381e-13
LYVE1	chr11	10556966	10611689	-	1.5689	2.03237	61.923	3.57153e-15	1.71039e-13
AC003090.1	chr7	25593351	25750994	-	2.63677	-0.368233	61.9115	3.59249e-15	1.71746e-13
FRMD6	chr14	51489100	51730727	+	1.2873	4.43321	61.8609	3.68592e-15	1.75909e-13
FENDRR	chr16	86474529	86509099	-	1.66871	3.98313	61.8032	3.79564e-15	1.80834e-13
PLEKHO2	chr15	64841883	64868007	+	0.828263	5.02942	61.7915	3.81816e-15	1.81595e-13
CORO6	chr17	29614756	29622907	-	1.58773	0.296685	61.7788	3.84293e-15	1.8246e-13
F13A1	chr6	6144085	6321013	-	1.92895	4.2982	61.7615	3.87671e-15	1.8375e-13
EFEMP2	chr11	65866441	65873592	-	1.17243	5.01456	61.7191	3.96113e-15	1.8743e-13
MAGI2	chr7	78017057	79453574	-	1.33204	1.94932	61.6425	4.11826e-15	1.94533e-13
GAB3	chrX	154675249	154751583	-	1.04031	2.08501	61.6152	4.17581e-15	1.96917e-13
IL6ST	chr5	55935095	55994993	-	0.852904	7.25537	61.5758	4.2603e-15	2.0056e-13
CD79A	chr19	41877120	41881372	+	2.22735	5.06629	61.5296	4.36127e-15	2.04965e-13
ABCA6	chr17	69078702	69141888	-	1.50659	1.95135	61.5203	4.38197e-15	2.05242e-13
C1QTNF4	chr11	47589664	47594659	-	1.8637	-0.90121	61.4581	4.52267e-15	2.11475e-13
FEZ1	chr11	125445745	125496317	-	1.29778	2.78395	61.4259	4.59722e-15	2.14599e-13
FMNL3	chr12	49636499	49708165	-	0.85562	5.63692	61.3793	4.70741e-15	2.19373e-13
PIK3CG	chr7	106865278	106907145	+	1.46297	3.11822	61.3604	4.75282e-15	2.21118e-13
RP11-62F24.2	chr9	16726814	16727524	+	2.2977	-4.07441	61.2974	4.90733e-15	2.27924e-13
GRIA3	chrX	123184153	123490915	+	1.71877	-1.38619	60.9868	5.74575e-15	2.66418e-13
ATP8B4	chr15	49858238	50182817	-	1.04748	1.47468	60.9119	5.96858e-15	2.76289e-13
SLITRK3	chr3	165186720	165197109	-	3.07139	-0.955374	60.9085	5.97894e-15	2.76307e-13
PCDHGB7	chr5	141417645	141512979	+	1.25072	3.06857	60.8784	6.07125e-15	2.80106e-13
RP11-736K20.5	chr11	86892214	86925037	-	1.36892	-1.08904	60.795	6.33381e-15	2.91734e-13
RP13-514E23.1	chr4	86012296	86013874	-	1.97014	-2.3138	60.7906	6.34795e-15	2.91901e-13
FCRL1	chr1	157794403	157820105	-	2.87914	1.18244	60.6892	6.68344e-15	3.06819e-13
CCL19	chr9	34689567	34691277	-	2.65689	3.34947	60.6635	6.77124e-15	3.10335e-13
DLC1	chr8	13083361	13604610	-	1.04666	5.1926	60.6022	6.98562e-15	3.19632e-13
RP11-798M19.6	chr4	173363780	173370446	-	1.07853	-0.212212	60.5537	7.15977e-15	3.27061e-13
SSPN	chr12	26121991	26299290	+	1.37417	4.58992	60.518	7.29103e-15	3.3251e-13
FAM43B	chr1	20552439	20555010	+	1.82252	-1.00551	60.4806	7.43074e-15	3.38325e-13
CD99L2	chrX	150766337	150898816	-	0.956571	4.95258	60.4584	7.51517e-15	3.41608e-13
CARTPT	chr5	71719163	71721048	+	4.96386	0.77932	60.4222	7.65434e-15	3.47364e-13
SNX29	chr16	11976737	12574289	+	0.752815	4.61179	60.4128	7.69094e-15	3.48455e-13
RP11-517I3.2	chr5	126496279	126498604	+	1.09702	0.462831	60.3866	7.79417e-15	3.52556e-13
CYP2U1	chr4	107931369	107953457	+	1.05801	3.05335	60.375	7.84035e-15	3.54067e-13
PLA2G5	chr1	20028179	20091190	+	1.92074	0.331899	60.2921	8.1773e-15	3.68683e-13
SHE	chr1	154469772	154502113	-	1.14721	2.81839	60.2786	8.23388e-15	3.70632e-13
CRTAC1	chr10	97865000	98030828	-	2.43102	0.414898	60.2711	8.26521e-15	3.71439e-13
AMPH	chr7	38383704	38631567	-	1.36933	1.06769	60.2171	8.49511e-15	3.81153e-13
SYT15	chr10	46578217	46594173	+	1.19724	1.18989	60.1775	8.66766e-15	3.88266e-13
PLCG2	chr16	81739097	81962693	+	1.38302	4.707	60.0815	9.10101e-15	4.07021e-13
PCOLCE	chr7	100602177	100608175	+	1.24879	5.83736	59.9692	9.63511e-15	4.30213e-13
RP11-180N14.1	chr3	21412222	21413944	-	1.89148	-1.66173	59.9176	9.89131e-15	4.40942e-13
NCKAP1L	chr12	54497711	54548238	+	1.27067	4.86704	59.8832	1.00655e-14	4.47985e-13
CD33	chr19	51225064	51243860	+	1.33923	1.20592	59.8578	1.01963e-14	4.5308e-13
RP11-532F6.3	chr6	708592	711405	-	1.44826	0.147225	59.7683	1.06707e-14	4.73405e-13
FGL2	chr7	77193371	77199826	-	1.54766	5.66677	59.7606	1.07127e-14	4.74276e-13
CFD	chr19	859643	863630	+	1.63825	4.75942	59.7584	1.07246e-14	4.74276e-13
PRIMA1	chr14	93718298	93788481	-	2.64634	2.8708	59.7529	1.07547e-14	4.74849e-13
TESPA1	chr12	54948018	54984746	-	1.43448	1.53978	59.6873	1.11194e-14	4.90174e-13
CSGALNACT2	chr10	43138486	43185308	+	0.692423	4.67728	59.6561	1.12967e-14	4.972e-13
C1QTNF7	chr4	15339818	15446166	+	1.9255	1.939	59.6085	1.15734e-14	5.08569e-13
PHLDB1	chr11	118606440	118658038	+	0.930945	5.78255	59.5743	1.17761e-14	5.16658e-13
P2RY14	chr3	151212117	151278467	-	1.52642	2.15453	59.4993	1.22338e-14	5.35892e-13
MARCH1	chr4	163524298	164384050	-	0.994205	3.37177	59.4747	1.23875e-14	5.41767e-13
MYBPC2	chr19	50432903	50466321	+	3.03099	-0.0221047	59.4578	1.24944e-14	5.45582e-13
TOR1AIP1	chr1	179882042	179925000	+	0.591075	5.96456	59.439	1.26146e-14	5.49966e-13
GRASP	chr12	52006940	52015889	+	1.06483	2.76318	59.3542	1.31701e-14	5.72513e-13
RNF122	chr8	33547755	33567125	-	0.924198	2.70266	59.3537	1.31731e-14	5.72513e-13
REEP2	chr5	138439017	138446969	+	1.87586	1.9083	59.1675	1.44806e-14	6.27371e-13
TRPC1	chr3	142724074	142807888	+	1.33713	1.57673	59.1629	1.45147e-14	6.27869e-13
FGFR1	chr8	38411138	38468834	-	1.39029	5.76104	59.1202	1.48327e-14	6.40627e-13
LGI2	chr4	24998847	25030879	-	1.62202	3.32323	59.0738	1.51869e-14	6.54903e-13
MBNL1	chr3	152243828	152465780	+	0.635258	7.28807	59.0397	1.54526e-14	6.65327e-13
TNC	chr9	115019578	115118257	-	1.75767	7.7042	58.9113	1.64944e-14	7.09082e-13
HAND2	chr4	173524969	173530229	-	2.88598	3.84765	58.7844	1.75927e-14	7.53538e-13
TMEM255A	chrX	120258650	120311556	-	1.51122	1.40771	58.7825	1.76101e-14	7.53538e-13
GIMAP7	chr7	150514830	150521073	+	1.16856	3.21281	58.7485	1.79171e-14	7.65089e-13
CH25H	chr10	89205629	89207314	-	1.52515	1.91976	58.7465	1.79352e-14	7.65089e-13
EVL	chr14	99971449	100144236	+	1.02643	5.07496	58.7419	1.7977e-14	7.65691e-13
PPP1R12A	chr12	79773563	79935460	-	0.755324	6.28691	58.7101	1.82699e-14	7.76976e-13
SASH3	chrX	129779979	129795201	+	1.34528	4.12162	58.6554	1.87853e-14	7.97672e-13
BEND6	chr6	56955126	57027342	+	1.43047	0.584983	58.5287	2.00351e-14	8.48244e-13
ADIPOQ	chr3	186842690	186858463	+	5.67078	1.83701	58.5284	2.00375e-14	8.48244e-13
ZNF135	chr19	58059239	58086310	+	1.39624	0.806912	58.455	2.07999e-14	8.79175e-13
GPRASP2	chrX	102712176	102717733	+	1.04482	2.10132	58.4493	2.08598e-14	8.79393e-13
ADCY2	chr5	7396208	7830081	+	2.05645	1.90112	58.4485	2.08684e-14	8.79393e-13
KCNE4	chr2	223051814	223198399	+	1.35883	3.05978	58.3981	2.14098e-14	9.00835e-13
PEBP4	chr8	22713251	23000000	-	2.32526	-2.23293	58.3791	2.16173e-14	9.08188e-13
PLCXD3	chr5	41306954	41510628	-	2.5091	1.13006	58.3417	2.20329e-14	9.2425e-13
NPR2	chr9	35792154	35809732	+	0.893242	2.86603	58.3085	2.24074e-14	9.38538e-13
C16orf45	chr16	15434295	15625028	+	1.31056	3.66046	58.2817	2.27144e-14	9.49963e-13
RP11-875O11.1	chr8	22984596	23019335	-	1.09019	0.536331	58.2206	2.34318e-14	9.77539e-13
TACR1	chr2	75046463	75199700	-	2.20431	0.582294	58.2195	2.34443e-14	9.77539e-13
BHLHE22	chr8	64580367	64583628	+	1.54965	0.526613	58.2032	2.36399e-14	9.84215e-13
RP11-497E19.1	chr14	85524432	85529988	-	1.89582	-3.00711	58.1664	2.40857e-14	1.00126e-12
LGALS1	chr22	37675608	37679806	+	1.13531	7.20645	58.1635	2.41216e-14	1.00126e-12
PRDM6	chr5	123089121	123194266	+	1.47328	1.41208	58.1478	2.43151e-14	1.00779e-12
PPAPDC3	chr9	131289694	131309262	+	1.38874	0.897932	58.1001	2.49112e-14	1.03086e-12
ELMO1	chr7	36854361	37449249	-	0.993128	4.38431	58.0974	2.49461e-14	1.03086e-12
CACNA1H	chr16	1153241	1221771	+	1.679	5.66761	58.0902	2.50371e-14	1.03308e-12
RP11-615I2.2	chr16	68644248	68646168	-	1.42237	-1.07651	57.9927	2.6309e-14	1.08395e-12
LINC00426	chr13	30340270	30377145	-	1.37482	0.15852	57.9511	2.68718e-14	1.10549e-12
SNRPN	chr15	24823647	24978723	+	1.22139	4.40301	57.9386	2.70428e-14	1.11088e-12
SNX29P1	chr16	21380173	21386064	+	1.83431	-1.625	57.9043	2.75181e-14	1.12873e-12
FAM110D	chr1	26159020	26162628	+	1.26481	0.682088	57.8977	2.76114e-14	1.13088e-12
FBLN1	chr22	45502238	45601135	+	1.75636	7.42559	57.8663	2.80551e-14	1.14736e-12
TCF4	chr18	55222331	55664787	-	0.956136	5.70661	57.7771	2.93567e-14	1.19781e-12
CAMK2A	chr5	150219491	150290291	-	1.81031	-0.847122	57.7759	2.93751e-14	1.19781e-12
LINC00926	chr15	57300365	57307769	+	1.63954	1.60947	57.7022	3.04964e-14	1.24171e-12
GFPT2	chr5	180300690	180353387	-	1.47245	3.31649	57.6833	3.07901e-14	1.25183e-12
CORO1A	chr16	30182827	30189076	+	1.30489	5.64651	57.6556	3.1228e-14	1.26592e-12
GNG7	chr19	2511219	2702709	-	1.42958	2.54269	57.6259	3.1702e-14	1.28326e-12
HACD4	chr9	20999515	21031636	-	1.11116	3.44425	57.5783	3.24793e-14	1.31281e-12
GPM6A	chr4	175632934	176002664	-	2.53517	0.0503698	57.5657	3.26876e-14	1.31852e-12
TMEM156	chr4	38966744	39032922	-	1.43634	0.740803	57.564	3.27157e-14	1.31852e-12
RP11-693J15.5	chr12	92466451	92492091	+	2.40111	-0.37762	57.5598	3.27857e-14	1.31886e-12
GALNT15	chr3	16174649	16231992	+	1.68699	2.16613	57.5578	3.28192e-14	1.31886e-12
SPON1	chr11	13962689	14267884	+	1.76114	6.2159	57.5024	3.37562e-14	1.35079e-12
RP11-158I9.5	chr11	118885841	118887742	-	2.3017	-2.99116	57.5022	3.376e-14	1.35079e-12
GRPR	chrX	16123556	16153021	+	2.47902	-0.423239	57.4471	3.47199e-14	1.3872e-12
NTRK3	chr15	87859751	88256768	-	2.02477	0.517445	57.4429	3.47943e-14	1.38817e-12
ZNF382	chr19	36604817	36634113	+	1.26371	0.911781	57.4364	3.49089e-14	1.39074e-12
NGF	chr1	115285918	115338236	-	1.75854	-1.2693	57.3996	3.55684e-14	1.41498e-12
LINC01160	chr1	111599655	111608723	-	1.67976	-1.22408	57.3864	3.58066e-14	1.42242e-12
PRPH	chr12	49293252	49298686	+	2.44405	0.179538	57.3409	3.66448e-14	1.45363e-12
EPHA3	chr3	89107524	89482134	+	1.64981	3.74011	57.3303	3.6844e-14	1.45945e-12
FBN1	chr15	48408306	48645849	-	1.25648	7.17149	57.3125	3.7178e-14	1.46901e-12
TM6SF1	chr15	83107407	83144854	+	1.11485	1.26762	57.3118	3.71914e-14	1.46901e-12
KLF17	chr1	44118850	44135140	+	2.05993	-1.95176	57.3086	3.72532e-14	1.46936e-12
SMOC2	chr6	168441151	168673445	+	1.83294	6.14585	57.2663	3.80619e-14	1.49912e-12
GREM1	chr15	32717974	32745107	+	1.7346	8.24368	57.1245	4.09082e-14	1.60894e-12
TMEM240	chr1	1535174	1540453	-	1.26037	-1.22212	57.1209	4.09818e-14	1.60955e-12
TTC28	chr22	27978014	28679865	-	1.14433	4.65555	57.0873	4.16886e-14	1.63499e-12
CD72	chr9	35609533	35646810	-	1.21656	1.9619	57.0689	4.20808e-14	1.64805e-12
ANKRD33B	chr5	10564330	10657816	+	1.566	2.42808	57.037	4.27692e-14	1.67264e-12
NRP2	chr2	205681990	205798133	+	1.27973	5.8877	57.0071	4.34236e-14	1.69584e-12
FCRL2	chr1	157745733	157777132	-	2.08684	0.86462	56.9932	4.37316e-14	1.70547e-12
NCS1	chr9	130172578	130237304	+	1.52881	5.09869	56.9729	4.41867e-14	1.7208e-12
KCNJ8	chr12	21764955	21775581	-	1.17278	3.0087	56.9544	4.46044e-14	1.73463e-12
CLIC2	chrX	155276211	155334657	-	0.985616	3.16655	56.8391	4.72976e-14	1.83679e-12
HLF	chr17	55265012	55325065	+	1.8772	2.552	56.8189	4.77842e-14	1.85162e-12
LILRA4	chr19	54333185	54339150	-	2.03774	-0.698945	56.8178	4.78129e-14	1.85162e-12
CD1D	chr1	158179947	158184896	+	1.1784	0.860251	56.8014	4.8213e-14	1.8645e-12
MAP1LC3C	chr1	241995490	241999073	-	1.7013	-2.67939	56.7517	4.94469e-14	1.90956e-12
SELP	chr1	169588849	169630193	-	1.72018	3.19089	56.7115	5.04684e-14	1.9463e-12
RP11-680F20.12	chr11	125957900	125958652	+	1.78393	0.156415	56.7084	5.05479e-14	1.94666e-12
RBPMS	chr8	30384479	30572261	+	1.19459	6.27662	56.6948	5.08973e-14	1.95739e-12
S1PR1	chr1	101236888	101241518	+	1.07489	4.72562	56.6447	5.22106e-14	2.00235e-12
KCNK3	chr2	26692690	26733420	+	2.22691	2.52627	56.5982	5.34619e-14	2.0475e-12
CTD-2089N3.2	chr5	50969217	50970167	-	2.41967	-3.01923	56.5904	5.36745e-14	2.05281e-12
TTBK2	chr15	42738734	42920809	-	0.746231	3.85294	56.5849	5.38231e-14	2.05566e-12
NRXN3	chr14	78242391	79868290	+	2.21098	3.64058	56.5613	5.44732e-14	2.07763e-12
WISP2	chr20	44714844	44728509	+	2.2117	0.679363	56.5273	5.54237e-14	2.11097e-12
ELANE	chr19	851014	856247	+	2.10096	-2.8803	56.5177	5.56955e-14	2.11842e-12
PPP1R14A	chr19	38251237	38256591	-	1.76061	3.38221	56.5105	5.58989e-14	2.12324e-12
ZNF582	chr19	56375846	56393545	-	1.29043	-0.202611	56.5071	5.59947e-14	2.12397e-12
LEPR	chr1	65420652	65641559	+	1.31112	3.56922	56.4918	5.64323e-14	2.13764e-12
NCAM1	chr11	112961247	113278436	+	1.99055	3.28063	56.4352	5.80817e-14	2.19712e-12
PRSS23	chr11	86791059	86952910	+	1.09825	6.42254	56.4051	5.89765e-14	2.22793e-12
KIAA0408	chr6	127440343	127459391	-	2.01433	1.84038	56.3477	6.07237e-14	2.29081e-12
DAAM2	chr6	39792298	39904877	+	1.45477	4.73263	56.3201	6.15818e-14	2.32003e-12
GFRA2	chr8	21690403	21812357	-	1.6397	-0.0358294	56.295	6.23725e-14	2.34663e-12
RAB31	chr18	9708165	9862551	+	1.01816	6.0235	56.2698	6.31777e-14	2.3737e-12
GPR18	chr13	99254714	99261744	-	1.42445	0.153318	56.2471	6.39104e-14	2.39798e-12
RP11-366M4.11	chr4	164968587	164970002	-	1.41124	-1.5999	56.2336	6.43524e-14	2.4113e-12
PGM5-AS1	chr9	68355189	68357852	-	3.26468	-0.80056	56.2065	6.52448e-14	2.44144e-12
TUBB6	chr18	12307669	12344320	+	1.15134	5.50196	56.153	6.70446e-14	2.50429e-12
COL8A1	chr3	99638475	99799226	+	1.51201	6.14424	56.1513	6.71049e-14	2.50429e-12
LINC00475	chr9	92141298	92160114	+	1.60668	-2.47804	56.1037	6.87465e-14	2.5621e-12
TUSC5	chr17	1279663	1300987	+	3.45643	-0.305339	56.0457	7.08043e-14	2.63525e-12
EVC	chr4	5711197	5814305	+	1.32771	4.1214	56.024	7.15918e-14	2.66099e-12
COL21A1	chr6	56056590	56394094	-	1.75086	1.03824	56.0179	7.18155e-14	2.66573e-12
BICC1	chr10	58513140	58831437	+	1.28914	4.01958	55.919	7.55184e-14	2.79943e-12
ANGPTL2	chr9	127087332	127122883	-	1.2285	6.25373	55.8218	7.93467e-14	2.93669e-12
FCMR	chr1	206904386	206923247	-	1.59661	3.4345	55.8197	7.94329e-14	2.93669e-12
RP11-461O7.1	chr16	56092987	56191094	-	2.17263	-2.39285	55.8081	7.99023e-14	2.95011e-12
SERPING1	chr11	57597387	57614853	+	1.18487	8.01356	55.8034	8.00945e-14	2.95327e-12
EID1	chr15	48877886	48880183	+	0.74838	6.26639	55.7977	8.03246e-14	2.95782e-12
ACTN2	chr1	236686454	236764631	+	3.11045	1.22008	55.7666	8.16058e-14	3.00102e-12
IGFBP6	chr12	53097436	53102345	+	1.35806	3.87066	55.7463	8.2454e-14	3.02819e-12
MEOX1	chr17	43640388	43661954	-	1.52356	1.71036	55.7257	8.33222e-14	3.05603e-12
RASL12	chr15	65053337	65076690	-	1.16236	3.36019	55.6957	8.4603e-14	3.09891e-12
SIGLEC10	chr19	51410021	51417803	-	1.40586	3.62964	55.6819	8.51973e-14	3.11656e-12
DCHS1	chr11	6621323	6655854	-	1.05435	5.53242	55.6166	8.8075e-14	3.21758e-12
PENK	chr8	56436674	56446734	-	3.18535	0.887547	55.5506	9.10818e-14	3.32305e-12
DLG2	chr11	83455012	85627922	-	1.71122	1.02621	55.5393	9.16068e-14	3.33781e-12
TIMP2	chr17	78852977	78925387	-	1.03309	8.18683	55.4883	9.40175e-14	3.42115e-12
SIT1	chr9	35649295	35650950	-	1.53469	1.95457	55.4578	9.54866e-14	3.47005e-12
LAPTM5	chr1	30732469	30757820	-	1.1446	7.46864	55.4045	9.81131e-14	3.56084e-12
VIT	chr2	36696690	36814792	+	2.2565	-0.648206	55.3726	9.9715e-14	3.61425e-12
VIPR2	chr7	159028175	159144957	-	2.11251	1.53359	55.3516	1.00787e-13	3.64833e-12
SYDE1	chr19	15107403	15114988	+	1.01718	4.18617	55.3355	1.01616e-13	3.67354e-12
PTN	chr7	137227341	137343865	-	1.51886	2.73085	55.3157	1.02648e-13	3.706e-12
KCTD10	chr12	109448656	109477544	-	0.600861	5.73726	55.2843	1.04297e-13	3.76065e-12
RP11-359E10.1	chr11	19710934	19712619	-	1.93423	-1.37341	55.2555	1.0584e-13	3.81134e-12
MPEG1	chr11	59208510	59212951	-	1.30125	5.44913	55.2417	1.06585e-13	3.8332e-12
C1S	chr12	6988259	7071032	+	1.14603	7.72453	55.1159	1.13628e-13	4.08117e-12
HPSE2	chr10	98457077	99235862	-	2.50979	0.237672	55.1084	1.1406e-13	4.09139e-12
NIPSNAP3B	chr9	104764157	104777457	+	1.28133	-0.437098	55.1026	1.144e-13	4.09316e-12
LAT2	chr7	74199652	74229834	+	1.03732	3.06754	55.1025	1.14404e-13	4.09316e-12
ADRB3	chr8	37962991	37966965	-	2.62695	-1.2408	55.055	1.17205e-13	4.18796e-12
SCIMP	chr17	5208961	5234860	-	1.32699	2.69787	55.0476	1.17644e-13	4.19826e-12
RNF165	chr18	46326809	46463140	+	1.7458	-0.201045	54.9724	1.22234e-13	4.35084e-12
TLL1	chr4	165873258	166103895	+	1.49428	0.719958	54.9569	1.23204e-13	4.37976e-12
NRIP2	chr12	2825348	2835544	-	0.997289	1.70682	54.932	1.2477e-13	4.42975e-12
TLR7	chrX	12867083	12890380	+	1.40572	2.14386	54.8666	1.28994e-13	4.57383e-12
ENTPD1	chr10	95711779	95877266	+	0.699642	5.92495	54.7976	1.33607e-13	4.73135e-12
WHAMMP3	chr15	22664359	22686213	+	1.23977	0.411869	54.7877	1.34276e-13	4.74897e-12
TRPC4	chr13	37636636	37870425	-	1.57021	0.787247	54.7547	1.36554e-13	4.82342e-12
GDF6	chr8	96142330	96160792	-	2.15942	-0.460082	54.7437	1.3732e-13	4.84428e-12
GIMAP8	chr7	150450630	150479392	+	1.00387	3.25769	54.7006	1.40364e-13	4.94537e-12
LINC00900	chr11	115754248	115760627	-	1.12456	-0.570678	54.6893	1.41173e-13	4.96758e-12
DES	chr2	219418377	219426739	+	3.15768	9.84479	54.6686	1.4267e-13	5.01388e-12
GLI1	chr12	57460135	57472262	+	1.43487	2.20378	54.6433	1.44519e-13	5.07244e-12
ZBTB16	chr11	114059593	114250676	+	2.11496	2.02315	54.6297	1.45521e-13	5.10114e-12
FAM124B	chr2	224378698	224402085	-	1.22444	0.681849	54.6104	1.46956e-13	5.14493e-12
LINC01354	chr1	234527891	234531779	-	2.10343	-2.36226	54.6057	1.47307e-13	5.15072e-12
MEDAG	chr13	30906191	30925572	+	1.56123	3.09634	54.6029	1.47518e-13	5.15161e-12
FCER2	chr19	7688758	7702146	-	2.70231	1.27652	54.5948	1.48125e-13	5.16632e-12
NOVA1	chr14	26443093	26597754	-	1.97994	1.60462	54.5792	1.49311e-13	5.20112e-12
JAZF1	chr7	27830573	28180743	-	0.870769	3.72894	54.5427	1.52105e-13	5.29182e-12
RP11-536O18.1	chr9	13446491	13487511	+	1.80652	-1.83434	54.5382	1.52452e-13	5.29722e-12
AC017104.6	chr2	231388976	231394991	+	1.3073	-1.09153	54.5187	1.53973e-13	5.34338e-12
FBXO32	chr8	123497889	123541206	-	1.40116	6.13809	54.4835	1.56762e-13	5.43336e-12
RASSF8	chr12	25959029	26079892	+	1.40328	3.92419	54.4776	1.57229e-13	5.44277e-12
ARSB	chr5	78777209	78986087	-	0.766401	4.20529	54.4593	1.58699e-13	5.4868e-12
DOCK2	chr5	169637247	170083382	+	1.25098	4.4319	54.4561	1.58962e-13	5.48905e-12
LINC01266	chr3	536231	846015	+	1.98133	-2.58963	54.4464	1.59749e-13	5.50936e-12
TBC1D1	chr4	37891087	38139175	+	0.694368	6.00837	54.4347	1.60699e-13	5.53522e-12
ASPA	chr17	3472374	3503419	+	1.62645	0.577227	54.362	1.6676e-13	5.73688e-12
PARP15	chr3	122577602	122639047	+	1.51763	2.33763	54.3542	1.67421e-13	5.75249e-12
RP11-553L6.5	chr3	114314501	114316179	-	1.00623	3.17796	54.3293	1.69556e-13	5.81864e-12
MS4A7	chr11	60378482	60395951	+	1.16634	4.21082	54.3261	1.69829e-13	5.82078e-12
CTNNA3	chr10	65912518	67696169	-	2.74263	1.57805	54.318	1.70532e-13	5.83768e-12
GPR34	chrX	41688973	41697277	+	1.17846	2.69181	54.2351	1.7788e-13	6.08169e-12
KIAA2022	chrX	74732849	74925485	-	2.23588	0.126112	54.1778	1.83149e-13	6.25413e-12
NEFM	chr8	24913012	24919098	+	2.17872	-1.0438	54.0967	1.90857e-13	6.50933e-12
AF001548.3	chr16	15790975	15792717	-	2.93184	0.00631112	54.0706	1.93416e-13	6.58852e-12
LPAR1	chr9	110873263	111038458	-	1.21399	3.68658	54.0673	1.9374e-13	6.59146e-12
S100Z	chr5	76850001	76921650	+	1.57574	-2.95488	54.0404	1.96412e-13	6.67416e-12
CARD8-AS1	chr19	48255675	48258199	+	0.771275	1.30843	53.9818	2.02353e-13	6.85922e-12
MPPED2	chr11	30384493	30586872	-	1.37727	0.21567	53.9742	2.03139e-13	6.87744e-12
TSPAN18	chr11	44726465	44932421	+	1.37194	5.13415	53.966	2.03989e-13	6.89781e-12
RP3-477O4.14	chr20	35476203	35490982	-	1.27204	-2.28991	53.9609	2.04522e-13	6.90743e-12
KIAA0922	chr4	153466346	153636711	+	0.868456	4.0446	53.9382	2.06893e-13	6.97331e-12
MRAS	chr3	138347648	138405534	+	1.05827	3.95336	53.9374	2.06976e-13	6.97331e-12
TLR9	chr3	52221080	52226163	-	2.27905	-0.0855573	53.8965	2.11333e-13	7.11146e-12
ADAM19	chr5	157395534	157575775	-	0.942952	5.08944	53.8735	2.13822e-13	7.18648e-12
GPR135	chr14	59429022	59465342	-	1.14729	0.994378	53.865	2.14754e-13	7.20908e-12
RHOQ	chr2	46541806	46583121	+	0.695528	5.31509	53.8533	2.16027e-13	7.24304e-12
CDH11	chr16	64943753	65126112	-	1.13001	6.29582	53.8052	2.21385e-13	7.40931e-12
ADAMTS10	chr19	8580242	8610735	-	1.14042	2.51276	53.804	2.2152e-13	7.40931e-12
LINC00861	chr8	125922308	125951249	-	1.73161	1.115	53.7403	2.28822e-13	7.64432e-12
CX3CR1	chr3	39263494	39281735	-	1.6559	1.42734	53.7248	2.30638e-13	7.6957e-12
GNG11	chr7	93921699	93928610	+	0.997674	4.04198	53.7009	2.33462e-13	7.78057e-12
EDNRA	chr4	147480917	147544954	+	1.16091	4.33386	53.692	2.3452e-13	7.80644e-12
ERG	chr21	38380027	38661780	-	0.995092	3.54859	53.6341	2.41535e-13	8.02071e-12
PTPRM	chr18	7566782	8406861	+	0.930966	5.01308	53.5322	2.54385e-13	8.43732e-12
FMO1	chr1	171248471	171285978	+	1.76609	1.49918	53.5112	2.57118e-13	8.51776e-12
SPEG	chr2	219434846	219498287	+	2.13935	4.53902	53.5051	2.5792e-13	8.53414e-12
ST6GALNAC5	chr1	76867441	77065711	+	1.37585	2.4634	53.4262	2.68491e-13	8.87331e-12
LINC01197	chr15	95209099	95327129	-	1.45983	0.0584826	53.4143	2.70118e-13	8.91646e-12
KLHL41	chr2	169509702	169526262	+	1.70758	-0.608429	53.401	2.71965e-13	8.96676e-12
ELN	chr7	74027789	74069907	+	1.53583	6.11618	53.3097	2.84898e-13	9.38202e-12
MRC2	chr17	62627401	62693597	+	1.12613	6.4301	53.2889	2.87933e-13	9.46843e-12
CLEC2B	chr12	9852984	9870136	-	1.00316	3.01276	53.2858	2.88389e-13	9.46843e-12
FRZB	chr2	182833275	182867162	-	1.54323	4.42426	53.2847	2.88547e-13	9.46843e-12
GIMAP6	chr7	150625375	150632648	-	1.01298	4.0122	53.267	2.9116e-13	9.5429e-12
MAF	chr16	79585843	79600714	-	0.948072	5.13186	53.2107	2.99626e-13	9.80877e-12
GIMAP4	chr7	150567277	150573955	+	0.960653	4.43988	53.1579	3.07779e-13	1.00638e-11
GDF10	chr10	47300386	47313547	+	2.53993	-0.283134	53.1515	3.08786e-13	1.00711e-11
NR3C1	chr5	143277931	143435512	-	0.937373	5.23515	53.1509	3.08885e-13	1.00711e-11
SENCR	chr11	128691672	128696023	-	1.05685	-1.02424	53.1496	3.09093e-13	1.00711e-11
SLC18A3	chr10	49610301	49612720	+	4.26547	-1.59331	53.1054	3.16127e-13	1.02882e-11
ZBTB47	chr3	42653684	42665854	+	0.946794	3.9777	53.0998	3.17018e-13	1.03051e-11
C14orf37	chr14	57999735	58298139	-	1.04041	1.73052	53.0832	3.1972e-13	1.03808e-11
KCNIP1	chr5	170353487	170736632	+	1.97009	-1.04451	53.0771	3.2071e-13	1.04008e-11
ADGRA2	chr8	37784191	37844896	+	1.05377	6.15089	52.9978	3.33923e-13	1.08166e-11
RP5-1039K5.12	chr22	37943050	37944898	+	1.24787	1.89439	52.9875	3.35671e-13	1.08605e-11
RP11-876N24.1	chr16	10840384	10841544	-	3.02062	-2.67021	52.9461	3.42819e-13	1.10744e-11
PDE3A	chr12	20369245	20684381	+	1.5059	4.45005	52.9447	3.43079e-13	1.10744e-11
MARCH2	chr19	8413270	8439017	+	0.726867	4.24269	52.9266	3.46242e-13	1.11635e-11
NAV3	chr12	77830905	78213008	+	1.52411	1.44922	52.8465	3.60652e-13	1.16146e-11
AEBP1	chr7	44104361	44114562	+	1.25248	8.17997	52.8348	3.62807e-13	1.16704e-11
AC010226.4	chr5	115602057	115620659	+	1.00066	-0.859192	52.8225	3.65096e-13	1.17276e-11
A2M-AS1	chr12	9065177	9068060	+	1.20329	1.11951	52.8207	3.65429e-13	1.17276e-11
P2RY12	chr3	151337380	151384812	-	1.74491	-0.957128	52.7772	3.73613e-13	1.19764e-11
FAM13B	chr5	137937960	138051961	-	0.729327	4.66477	52.7711	3.74771e-13	1.19996e-11
ADCYAP1R1	chr7	31052461	31111479	+	2.27826	-0.405856	52.7651	3.75922e-13	1.20188e-11
RP11-652L8.4	chr11	118002348	118003037	+	1.54794	-3.08795	52.7634	3.76238e-13	1.20188e-11
LCN6	chr9	136744011	136748528	-	1.92706	-2.24045	52.7501	3.78807e-13	1.2087e-11
RCAN2	chr6	46220736	46491972	-	1.40116	4.45083	52.7405	3.80668e-13	1.21324e-11
GPC6	chr13	93226842	94407401	+	1.186	4.46112	52.7323	3.8226e-13	1.21691e-11
ADCYAP1	chr18	904943	912172	+	2.23879	0.278065	52.7259	3.83506e-13	1.21948e-11
USP51	chrX	55484616	55489202	-	1.25511	0.680366	52.6923	3.90114e-13	1.23907e-11
MEF2A	chr15	99565417	99716466	+	0.65797	5.92272	52.6684	3.94888e-13	1.2528e-11
PPM1K	chr4	88257620	88284769	-	0.890178	3.86769	52.6422	4.00206e-13	1.26769e-11
CLEC10A	chr17	7074537	7080307	-	1.62745	1.80642	52.6407	4.00497e-13	1.26769e-11
CACNA1C	chr12	1970786	2697950	+	1.60972	4.68511	52.6217	4.04398e-13	1.27858e-11
AC053503.12	chr2	219427477	219429319	+	3.36343	0.0768407	52.5853	4.11971e-13	1.30104e-11
SDPR	chr2	191834302	191847255	-	1.6077	4.36374	52.5535	4.18675e-13	1.32071e-11
NPR1	chr1	153678637	153693992	+	1.23628	2.742	52.5117	4.27695e-13	1.3461e-11
IGFBP5	chr2	216672105	216695525	-	1.26464	8.9444	52.5025	4.29692e-13	1.35085e-11
NAP1L2	chrX	73212299	73214848	-	2.00238	-0.0193721	52.4908	4.32279e-13	1.35744e-11
GSN	chr9	121207794	121332843	+	0.974177	8.49429	52.4675	4.37434e-13	1.37184e-11
PTPRCAP	chr11	67435510	67438067	-	1.67282	4.15299	52.4656	4.37852e-13	1.37184e-11
ADORA2A	chr22	24417879	24442360	+	1.24414	2.31832	52.4333	4.45121e-13	1.39304e-11
DPYS	chr8	104330324	104467053	-	2.57435	-2.49427	52.3102	4.73906e-13	1.48145e-11
ZNF423	chr16	49487524	49857919	-	1.36918	3.43642	52.298	4.76848e-13	1.48897e-11
DSEL	chr18	67506582	67516980	-	1.40096	2.61161	52.2063	4.99659e-13	1.55844e-11
RP11-815J21.4	chr15	85619623	85670948	-	1.17252	-1.64844	52.1511	5.13895e-13	1.60104e-11
MYOT	chr5	137867791	137887851	+	1.93939	-1.17225	52.1074	5.25454e-13	1.63522e-11
RNASE6	chr14	20781051	20782467	+	1.1806	3.70278	52.0764	5.33836e-13	1.65944e-11
KCND1	chrX	48961378	48971569	-	1.02431	1.85579	52.0506	5.40873e-13	1.67943e-11
ADARB1	chr21	45073853	45226560	+	0.894029	4.19909	52.0348	5.45248e-13	1.69112e-11
HOXA4	chr7	27128507	27130799	-	1.46053	2.12501	52.0226	5.48669e-13	1.69983e-11
EOGT	chr3	68975214	69013961	-	0.730239	4.64019	51.8965	5.85033e-13	1.81047e-11
DIRC3	chr2	217284019	217756593	-	1.53916	-2.14438	51.8873	5.87804e-13	1.81524e-11
AOX1	chr2	200585868	200677064	+	1.91123	2.45439	51.887	5.87884e-13	1.81524e-11
RP11-1334A24.5	chr5	177476631	177479656	-	1.40849	-1.08417	51.8352	6.03609e-13	1.86172e-11
LINC01573	chr9	136546212	136549893	+	1.91937	-1.76403	51.8244	6.06934e-13	1.8699e-11
RP11-455F5.5	chr16	30183505	30184957	-	1.50035	-2.43665	51.8206	6.0812e-13	1.87147e-11
C1orf162	chr1	111473792	111478512	+	1.15498	3.67566	51.8012	6.14139e-13	1.8879e-11
RP11-1000B6.3	chr15	32536047	32587613	+	1.27257	-1.86398	51.7953	6.15986e-13	1.89148e-11
THY1	chr11	119417378	119424985	-	1.08788	6.96665	51.661	6.59604e-13	2.02317e-11
FLT3LG	chr19	49474207	49486231	+	0.917245	2.44828	51.6586	6.60409e-13	2.02341e-11
RP11-514D23.2	chr16	86225580	86275745	-	2.01512	-3.79542	51.6552	6.61554e-13	2.02468e-11
PTBP2	chr1	96721665	96823738	+	0.819718	3.68414	51.645	6.64986e-13	2.03183e-11
HCLS1	chr3	121631399	121660927	-	1.0932	4.64985	51.6439	6.65358e-13	2.03183e-11
RAI2	chrX	17800049	17861337	-	1.35047	3.90765	51.6167	6.74656e-13	2.05796e-11
CRISPLD2	chr16	84819984	84920768	+	1.09446	6.2999	51.5713	6.90449e-13	2.10382e-11
FLJ27354	chr1	89583241	89632894	-	1.04715	-1.71078	51.5591	6.9474e-13	2.11457e-11
GPBAR1	chr2	218259496	218263859	+	1.46675	2.24063	51.5146	7.10661e-13	2.16066e-11
RP11-384P7.7	chr9	33697459	33700986	+	2.37951	-1.2307	51.5076	7.13191e-13	2.16598e-11
TSPYL2	chrX	53082367	53088540	+	0.893027	3.79007	51.4809	7.22967e-13	2.19327e-11
VEGFC	chr4	176683538	176792727	-	0.866891	2.81446	51.4527	7.33426e-13	2.22256e-11
CADM3-AS1	chr1	159194325	159207973	-	2.1604	-0.831659	51.445	7.36303e-13	2.22851e-11
DPEP2	chr16	67987394	68000586	-	1.08937	1.05136	51.4432	7.36995e-13	2.22851e-11
CACNA2D1	chr7	81946444	82443798	-	1.46343	4.10524	51.3974	7.54372e-13	2.27857e-11
COL19A1	chr6	69866571	70209976	+	2.32821	-0.485954	51.3316	7.80101e-13	2.35371e-11
ADAMTS9-AS1	chr3	64561322	64592757	+	1.71368	-0.964981	51.3041	7.9111e-13	2.38434e-11
ST8SIA4	chr5	100806935	100903266	-	0.922328	3.43309	51.2711	8.04522e-13	2.42213e-11
LRRK2	chr12	40196744	40369285	+	1.31324	3.05221	51.2647	8.07137e-13	2.42736e-11
JAKMIP2	chr5	147585439	147782848	-	1.46366	0.79185	51.2502	8.13105e-13	2.44266e-11
SVILP1	chr10	30671566	30717266	+	1.66888	-0.0025556	51.2293	8.21828e-13	2.4662e-11
PPAP2A	chr5	55424854	55535050	-	0.878794	5.3705	51.2054	8.31886e-13	2.49368e-11
ZNF154	chr19	57697367	57709194	-	1.07357	2.02141	51.1981	8.34998e-13	2.5003e-11
HGF	chr7	81699006	81770438	-	1.28194	2.9124	51.1509	8.55315e-13	2.55838e-11
IL1R1	chr2	102064544	102179874	+	0.997193	6.19411	51.1476	8.56764e-13	2.55995e-11
RP11-92C4.6	chr9	98943337	98943775	-	1.40712	0.187853	51.1202	8.68808e-13	2.59059e-11
CYYR1	chr21	26466209	26573284	-	0.90657	3.50153	51.1195	8.69092e-13	2.59059e-11
MEG3	chr14	100779410	100861031	+	1.31787	3.82241	51.1179	8.69821e-13	2.59059e-11
GRIK5	chr19	41998321	42069498	-	1.93675	1.8132	51.0746	8.8921e-13	2.6455e-11
HIC1	chr17	2054154	2063241	+	1.05087	4.6359	50.9611	9.42163e-13	2.80003e-11
ISL2	chr15	76336724	76342476	+	1.25666	0.883837	50.9486	9.48184e-13	2.81491e-11
PHOX2A	chr11	72239077	72245664	-	3.4097	-2.70412	50.9435	9.50622e-13	2.81913e-11
DNAJB4	chr1	77979175	78017964	+	0.858388	3.99082	50.8897	9.7706e-13	2.89444e-11
PAMR1	chr11	35431823	35530300	-	1.21899	2.32625	50.8527	9.95626e-13	2.94629e-11
RP11-679B19.1	chr16	79202624	79206739	-	1.16212	-1.12211	50.8496	9.97207e-13	2.94782e-11
CTSO	chr4	155924118	155953917	-	0.841364	4.84571	50.7201	1.06522e-12	3.14552e-11
FOLR2	chr11	72216601	72221950	+	1.39393	3.09623	50.7139	1.06859e-12	3.15211e-11
SFRP2	chr4	153780592	153789120	-	2.15748	7.06956	50.7068	1.0725e-12	3.16028e-11
CDON	chr11	125955796	126063335	-	1.49747	3.51977	50.6472	1.10551e-12	3.2541e-11
ARHGAP31	chr3	119294373	119420714	+	0.892411	4.86315	50.6277	1.11656e-12	3.28315e-11
PPP1R16B	chr20	38805705	38923024	+	1.2658	4.20328	50.6046	1.12979e-12	3.31502e-11
CASP12	chr11	104885718	104898670	-	1.41817	-2.36932	50.5859	1.14063e-12	3.34328e-11
MMRN2	chr10	86935540	86969481	-	0.939255	4.73602	50.5676	1.1513e-12	3.36996e-11
PURG	chr8	30995802	31033715	-	1.45552	-2.34809	50.5661	1.15216e-12	3.36996e-11
RBFOX2	chr22	35738736	36028425	-	0.591588	6.15075	50.5408	1.16712e-12	3.41009e-11
ZNF540	chr19	37551406	37614097	+	1.13668	-0.136132	50.5247	1.17676e-12	3.43464e-11
KCNS2	chr8	98427022	98432848	+	1.66977	-1.3194	50.4549	1.21935e-12	3.55275e-11
TNN	chr1	175067858	175148066	+	2.07979	1.54427	50.4542	1.21978e-12	3.55275e-11
RAP2C-AS1	chrX	132217147	132432862	+	0.965209	0.593096	50.4082	1.24872e-12	3.63322e-11
MYOZ2	chr4	119135784	119187789	+	2.22013	-2.85416	50.3966	1.25611e-12	3.65089e-11
COL8A2	chr1	36095236	36125220	-	1.29749	3.71413	50.2901	1.32617e-12	3.85048e-11
VWC2	chr7	49773661	49921950	+	2.4535	-1.1041	50.2855	1.32927e-12	3.85543e-11
C16orf89	chr16	5044122	5066110	-	2.09602	1.76567	50.1854	1.39887e-12	4.05306e-11
LSP1	chr11	1852970	1892267	+	1.08913	5.75807	50.1794	1.40315e-12	4.0609e-11
WDFY4	chr10	48684876	48982956	+	1.48247	4.11812	50.1775	1.4045e-12	4.0609e-11
PWAR6	chr15	25031873	25036490	+	1.77344	0.533322	50.1667	1.41226e-12	4.07908e-11
GPR183	chr13	99294530	99307405	-	1.12353	3.66722	50.1602	1.41694e-12	4.08833e-11
DOK5	chr20	54475597	54651171	+	1.25288	0.897307	50.1557	1.42014e-12	4.09332e-11
TRAF3IP3	chr1	209756032	209782320	+	1.24346	2.72228	50.1147	1.45018e-12	4.17554e-11
VAV1	chr19	6772714	6857366	+	1.13707	3.32531	50.1121	1.45208e-12	4.17669e-11
RXFP1	chr4	158315311	158653372	+	1.94755	-1.05773	50.0829	1.47389e-12	4.23503e-11
SLITRK5	chr13	87672615	87696272	+	2.34398	0.83262	50.0732	1.48117e-12	4.25155e-11
EVI2A	chr17	31317560	31321884	-	1.05651	2.96187	50.0336	1.51132e-12	4.3336e-11
C2orf40	chr2	106063246	106078159	+	2.81484	3.03071	50.031	1.51333e-12	4.33488e-11
DOK6	chr18	69401055	69849087	+	1.14709	1.18377	50.0049	1.5336e-12	4.38842e-11
PTPN5	chr11	18727928	18792721	-	1.68196	-0.299229	49.9993	1.53804e-12	4.39657e-11
AP000473.8	chr21	16643529	16645065	+	2.13467	-3.14361	49.8556	1.65492e-12	4.7258e-11
CYBRD1	chr2	171522247	171558133	+	1.27711	6.46721	49.8251	1.68081e-12	4.79481e-11
TLN1	chr9	35696948	35732395	-	0.827139	9.0265	49.7939	1.70776e-12	4.86667e-11
CPZ	chr4	8592660	8619759	+	1.3657	3.90413	49.7755	1.72387e-12	4.90755e-11
PARVG	chr22	44172956	44219533	+	1.02905	3.29927	49.7395	1.75572e-12	4.99309e-11
OLFML3	chr1	113979391	114035572	+	1.22407	4.75556	49.7372	1.75784e-12	4.99399e-11
NLGN3	chrX	71144831	71171201	+	1.23754	1.23293	49.7214	1.77206e-12	5.02924e-11
AARD	chr8	116938199	116944487	+	2.05874	-0.749394	49.6964	1.79477e-12	5.08848e-11
CD180	chr5	67179613	67196799	-	1.44495	2.96958	49.6878	1.80266e-12	5.10565e-11
SERTAD4-AS1	chr1	210231456	210234047	-	1.61078	1.08441	49.651	1.8368e-12	5.19702e-11
KLF9	chr9	70384597	70414624	-	1.05337	5.75146	49.6041	1.88124e-12	5.31733e-11
AC018647.3	chr7	35715034	35734887	+	1.61056	-2.89943	49.579	1.90542e-12	5.3802e-11
MS4A14	chr11	60378530	60417756	+	1.11918	0.686657	49.561	1.92295e-12	5.42416e-11
RP11-554A11.5	chr11	69004394	69005100	+	3.26947	-3.84065	49.5507	1.93315e-12	5.4474e-11
SPG20	chr13	36301638	36370180	-	1.14701	4.24734	49.5482	1.93556e-12	5.44865e-11
RBFOX3	chr17	79089345	79516148	-	2.7104	1.019	49.5409	1.94282e-12	5.46353e-11
CNTNAP1	chr17	42682613	42699814	+	1.22838	4.11993	49.4861	1.99785e-12	5.61259e-11
AOC4P	chr17	42865922	42874369	+	1.76621	-1.4164	49.4788	2.00524e-12	5.62767e-11
CXorf21	chrX	30558824	30577844	-	1.089	0.797811	49.4747	2.0095e-12	5.6339e-11
KCNA1	chr12	4909905	4931361	+	3.6732	0.201921	49.4709	2.01331e-12	5.6389e-11
CD36	chr7	80369575	80679277	+	1.38292	3.84882	49.462	2.02246e-12	5.65882e-11
LRRC17	chr7	102912991	102944949	+	1.35864	1.20298	49.4549	2.02988e-12	5.67221e-11
RP11-124N14.3	chr10	17233325	17234833	-	1.21399	-1.65159	49.4535	2.03134e-12	5.67221e-11
CCDC50	chr3	191329077	191398670	+	0.653967	5.98396	49.4272	2.05871e-12	5.74284e-11
PVRIG	chr7	100218241	100221490	+	1.53557	1.77622	49.383	2.10558e-12	5.8677e-11
COL3A1	chr2	188974320	189012746	+	1.2775	11.0428	49.3092	2.1863e-12	6.08653e-11
LINC00924	chr15	95433095	95507847	+	1.61631	-0.772262	49.3036	2.19261e-12	6.09797e-11
RHOH	chr4	40191053	40246967	+	1.28877	2.81306	49.2651	2.23603e-12	6.21249e-11
SYT4	chr18	43267878	43277650	-	3.30104	0.779108	49.2386	2.2665e-12	6.29085e-11
EHD2	chr19	47713343	47743134	+	1.0604	7.02551	49.2269	2.28006e-12	6.32216e-11
DENND5A	chr11	9138825	9265390	-	0.886279	5.12399	49.2023	2.30877e-12	6.39536e-11
RP11-932O9.9	chr15	30616958	30617749	+	1.23325	-0.820776	49.199	2.31271e-12	6.39988e-11
RGS2	chr1	192809039	192812283	+	1.16855	5.15023	49.1864	2.3276e-12	6.43466e-11
RP11-524D16__A.3	chrX	100673330	100673981	+	1.17888	-0.735248	49.14	2.38333e-12	6.58218e-11
CEP85L	chr6	118460772	118710075	-	0.908906	2.49827	49.1191	2.40879e-12	6.64227e-11
GJC1	chr17	44798448	44830816	-	1.26136	3.71987	49.1182	2.40988e-12	6.64227e-11
SEPT1	chr16	30378133	30395991	-	1.21602	3.24192	49.0527	2.49173e-12	6.86105e-11
C4A	chr6	31982024	32002681	+	1.38414	6.77781	49.0011	2.55821e-12	7.0371e-11
ADAMTSL1	chr9	18473894	18910950	+	1.24966	2.54493	48.9627	2.60883e-12	7.16924e-11
RP11-710C12.1	chr4	95549129	95552457	+	1.13232	-1.77719	48.8974	2.69711e-12	7.40429e-11
AMOTL1	chr11	94706431	94876753	+	1.1972	5.71958	48.8955	2.6997e-12	7.40429e-11
CTC-510F12.7	chr19	11221083	11221573	+	1.3893	-2.28934	48.8933	2.70268e-12	7.40514e-11
FAM198A	chr3	42979267	43060211	+	1.65822	1.50626	48.8845	2.71485e-12	7.43112e-11
SNHG14	chr15	24978583	25419462	+	1.50367	3.52541	48.8219	2.80287e-12	7.66449e-11
CTD-2555O16.2	chr14	64422935	64448557	-	0.947351	-0.929799	48.8185	2.80786e-12	7.67056e-11
MAP3K12	chr12	53479669	53500063	-	0.789982	3.19671	48.806	2.82575e-12	7.71185e-11
BTLA	chr3	112463968	112499561	-	1.5945	0.281544	48.705	2.97507e-12	8.11139e-11
MS4A6A	chr11	60172014	60184666	-	1.11944	4.69858	48.7	2.98259e-12	8.12389e-11
CTC-296K1.3	chr17	44793199	44794474	+	2.37982	-3.15896	48.6796	3.01386e-12	8.201e-11
RP11-876N24.2	chr16	10864914	10888752	-	1.96672	-3.39977	48.6454	3.06687e-12	8.33708e-11
RAB12	chr18	8609445	8639381	+	0.673445	4.58743	48.6202	3.1066e-12	8.43234e-11
CMTM5	chr14	23376808	23379772	+	2.25405	-2.78433	48.6193	3.108e-12	8.43234e-11
MCC	chr5	113022099	113488830	-	1.08231	3.81681	48.6014	3.13642e-12	8.50114e-11
NMUR1	chr2	231523160	231530495	-	1.3596	0.745251	48.5958	3.14546e-12	8.51733e-11
LINC00968	chr8	56496246	56559823	-	1.62991	-1.88129	48.5887	3.15678e-12	8.53964e-11
PLEKHA2	chr8	38901235	38973909	+	0.732294	5.46358	48.5835	3.16527e-12	8.55426e-11
CAND2	chr3	12796472	12871916	+	1.6314	2.1264	48.5787	3.17291e-12	8.56328e-11
NCAM2	chr21	20998315	21543329	+	1.82996	0.902928	48.5776	3.17479e-12	8.56328e-11
VAMP2	chr17	8159149	8163546	-	0.607241	5.60789	48.5015	3.30032e-12	8.89322e-11
MSC-AS1	chr8	71828167	72118393	+	1.02288	1.82097	48.4373	3.41017e-12	9.1803e-11
LURAP1	chr1	46203334	46221261	+	1.32553	-0.195514	48.4168	3.44597e-12	9.26768e-11
CPEB1	chr15	82543201	82648861	-	1.74874	0.108185	48.401	3.47384e-12	9.3336e-11
SLMAP	chr3	57755450	57929168	+	0.838282	6.53965	48.395	3.48451e-12	9.3532e-11
ECSCR	chr5	139448556	139462743	-	0.962367	2.79106	48.3466	3.57172e-12	9.57801e-11
LINC00092	chr9	96019732	96027965	-	1.51003	-0.969715	48.2951	3.66658e-12	9.82289e-11
PKMP3	chr6	85659892	85660606	-	1.46829	-2.69168	48.2728	3.70861e-12	9.92591e-11
MAP7D3	chrX	136213220	136256482	-	0.99622	3.30277	48.1616	3.92507e-12	1.04951e-10
RNF112	chr17	19411125	19417276	+	1.30483	-1.14698	48.1457	3.95693e-12	1.05701e-10
MYO1G	chr7	44962662	44979098	-	1.14403	3.59286	48.126	3.99693e-12	1.06667e-10
IGSF21	chr1	18107746	18378483	+	1.44083	0.304283	48.1007	4.04878e-12	1.07947e-10
WNT9A	chr1	227918656	227947898	-	1.68217	2.1791	48.0583	4.1373e-12	1.10201e-10
RP11-1069G10.1	chr15	62827675	62884034	-	1.77565	0.239632	48.0256	4.20682e-12	1.11838e-10
LIMD2	chr17	63695902	63701172	-	1.14199	4.37037	47.9874	4.28967e-12	1.13931e-10
RAB33A	chrX	130171649	130184870	+	1.01498	-0.635423	47.9817	4.30226e-12	1.14156e-10
PRNP	chr20	4686236	4701590	+	0.964911	6.52203	47.9451	4.38316e-12	1.16191e-10
CD27	chr12	6444867	6451718	+	1.54085	3.3443	47.9332	4.40987e-12	1.16788e-10
C1QTNF3	chr5	34019448	34043832	-	1.55907	3.13815	47.891	4.50579e-12	1.19214e-10
RSPO3	chr6	127118604	127197765	+	1.67745	3.52122	47.8677	4.55961e-12	1.20523e-10
CTB-109A12.1	chr5	157362615	157460078	-	1.83589	-1.86832	47.8635	4.56947e-12	1.20669e-10
KLHL5	chr4	39045039	39126857	+	0.876168	4.93762	47.8006	4.71844e-12	1.24484e-10
ZFHX4	chr8	76681219	76867285	+	1.60888	3.18329	47.781	4.76581e-12	1.25614e-10
FLT3	chr13	28003274	28100592	-	1.4708	-0.400889	47.7599	4.81754e-12	1.26737e-10
TAC1	chr7	97731908	97740472	+	3.68261	-0.0859395	47.7543	4.83133e-12	1.26979e-10
PIK3CD	chr1	9651732	9729114	+	0.993462	4.19281	47.7441	4.85652e-12	1.2752e-10
FGF10-AS1	chr5	44388732	44413989	+	2.17181	-3.58301	47.7363	4.87569e-12	1.27903e-10
ZNF671	chr19	57719751	57727624	-	0.903137	1.60145	47.7293	4.89321e-12	1.28241e-10
RP11-175K6.1	chr5	159100483	159117478	+	1.11443	-0.575987	47.7186	4.91995e-12	1.2882e-10
RP11-750H9.5	chr11	47383148	47409190	-	1.18691	-0.18472	47.7087	4.94504e-12	1.29355e-10
ADCY5	chr3	123282296	123449758	-	1.91146	4.46235	47.6661	5.05343e-12	1.32065e-10
MTUS2	chr13	28820348	29505947	+	2.00227	-0.553903	47.6523	5.08914e-12	1.32873e-10
FAM212B	chr1	111680630	111755824	-	1.00768	2.57465	47.6251	5.16028e-12	1.34604e-10
KCNK12	chr2	47516581	47570939	-	1.3151	0.121501	47.6117	5.19574e-12	1.35402e-10
PVALB	chr22	36800684	36819479	-	1.87445	-2.66557	47.5993	5.22865e-12	1.36132e-10
WHAMMP2	chr15	28737583	28759204	+	1.29623	0.0361747	47.5632	5.32579e-12	1.3853e-10
THSD7A	chr7	11370357	11832198	-	1.09851	2.25225	47.5264	5.42689e-12	1.41028e-10
FBLN2	chr3	13549131	13638422	+	1.38318	5.81533	47.5181	5.44972e-12	1.41489e-10
NGFR	chr17	49495293	49515017	+	2.25841	3.51237	47.4713	5.58143e-12	1.44773e-10
PTPRC	chr1	198638671	198757283	+	1.27395	5.95113	47.4665	5.59531e-12	1.44997e-10
DGKI	chr7	137381037	137847092	-	1.32725	0.9613	47.439	5.67436e-12	1.46908e-10
NFATC4	chr14	24365673	24379604	+	1.094	3.63702	47.4294	5.70201e-12	1.47486e-10
FAT3	chr11	92352096	92896470	+	2.06153	1.48551	47.388	5.82383e-12	1.50497e-10
REM1	chr20	31475293	31484905	+	1.20922	0.855751	47.3665	5.88814e-12	1.52017e-10
AP001055.6	chr21	44158740	44160076	-	1.14286	-1.79063	47.2548	6.23327e-12	1.60778e-10
FAM180B	chr11	47586693	47589194	+	2.51916	-3.15314	47.2482	6.25422e-12	1.61168e-10
WBSCR17	chr7	71132169	71713600	+	1.36485	1.16862	47.2323	6.30527e-12	1.62333e-10
TMEM55A	chr8	90993796	91041064	-	1.02389	3.0663	47.2215	6.33998e-12	1.63075e-10
ISM1	chr20	13221771	13300651	+	1.79581	2.22643	47.216	6.35791e-12	1.63382e-10
PDZRN3	chr3	73382433	73624940	-	1.44705	4.80685	47.2142	6.36368e-12	1.63382e-10
LINC01215	chr3	108125821	108138610	+	1.90855	-0.484314	47.2012	6.40611e-12	1.64319e-10
PLSCR4	chr3	146192339	146251179	-	1.05938	4.12003	47.1934	6.43178e-12	1.64825e-10
LMO1	chr11	8224304	8268716	-	3.61894	-0.90339	47.1784	6.48124e-12	1.65939e-10
BARX1	chr9	93951622	93955372	-	1.927	4.74268	47.1683	6.51452e-12	1.66637e-10
KLHDC1	chr14	49693105	49753152	+	0.95002	1.11161	47.133	6.63305e-12	1.69513e-10
UTRN	chr6	144285701	144853034	+	0.862235	6.29852	47.1157	6.69191e-12	1.70859e-10
ATP1B2	chr17	7646627	7657768	+	1.44188	1.67635	47.0861	6.79344e-12	1.73292e-10
DGKG	chr3	186105668	186362237	-	1.49952	2.21345	47.0669	6.86029e-12	1.74837e-10
TBC1D10C	chr11	67403915	67410089	+	1.26164	2.76121	47.0491	6.92318e-12	1.76277e-10
FMNL1	chr17	45221444	45247320	+	0.932436	5.0709	47.0444	6.93981e-12	1.76539e-10
PPP1R18	chr6	30676389	30687895	-	0.766202	5.73816	47.0012	7.09422e-12	1.80301e-10
IKZF1	chr7	50304124	50405101	+	1.25636	4.44919	46.9818	7.165e-12	1.81933e-10
CRYBB1	chr22	26599278	26618088	-	1.16191	-1.50588	46.9786	7.17667e-12	1.81996e-10
FCHSD2	chr11	72836745	73142261	-	0.585984	4.87471	46.9775	7.18059e-12	1.81996e-10
RP11-705C15.2	chr12	9617284	9658412	+	0.892125	1.65405	46.93	7.35693e-12	1.86295e-10
SYNE3	chr14	95407266	95475836	-	1.03514	3.32121	46.8787	7.55202e-12	1.91061e-10
TTLL11	chr9	121821928	122093606	-	0.794465	2.06013	46.8636	7.61013e-12	1.92355e-10
RP11-330H6.6	chr3	52217016	52219012	-	1.48302	-2.73663	46.8121	7.81311e-12	1.97306e-10
RIC3	chr11	8106093	8169055	-	1.92999	0.652474	46.7759	7.95846e-12	2.00794e-10
CHST11	chr12	104455295	104762014	+	1.06944	4.65166	46.7483	8.07139e-12	2.03458e-10
EHD3	chr2	31234337	31269447	+	1.04205	3.57065	46.727	8.15972e-12	2.05497e-10
STON1-GTF2A1L	chr2	48529925	48776517	+	2.62264	-0.0771011	46.7212	8.18408e-12	2.05863e-10
EPHA7	chr6	93240020	93419547	-	2.39181	2.97757	46.72	8.18907e-12	2.05863e-10
PPP1R12C	chr19	55090913	55117559	-	0.791969	5.86984	46.6182	8.62547e-12	2.16637e-10
PART1	chr5	60487713	60547657	+	2.17936	1.83603	46.5333	9.00763e-12	2.2603e-10
ZNF471	chr19	56507843	56530221	+	1.37478	1.06786	46.5244	9.04838e-12	2.26848e-10
CD1E	chr1	158353696	158357553	+	1.65961	0.0893888	46.5092	9.11889e-12	2.28409e-10
SUCNR1	chr3	151873643	151884619	+	1.79389	2.86923	46.4827	9.24297e-12	2.31308e-10
RP11-774O3.3	chr4	8355090	8358338	-	1.1132	1.35388	46.4652	9.32618e-12	2.3318e-10
LINC01537	chr11	72570660	72573229	+	1.4248	-2.27514	46.4543	9.37819e-12	2.34269e-10
ACTN1	chr14	68874143	68979440	-	0.910722	8.4935	46.4266	9.51138e-12	2.37382e-10
CD200	chr3	112332347	112362812	+	0.95212	3.0458	46.4046	9.61907e-12	2.39854e-10
CNR1	chr6	88139864	88166359	-	2.22084	1.97655	46.3543	9.86908e-12	2.45867e-10
DNM1P46	chr15	99790156	99806927	-	1.60197	-2.17694	46.324	1.0023e-11	2.49476e-10
FAM228B	chr2	24076526	24169640	+	0.816887	1.52396	46.3165	1.00615e-11	2.50212e-10
RP11-51B23.3	chr11	12538083	12540967	-	1.69954	-3.48327	46.3074	1.01079e-11	2.5114e-10
TNFAIP8L3	chr15	51056598	51105276	-	1.37734	1.48077	46.226	1.05367e-11	2.6156e-10
LCP1	chr13	46125920	46211871	-	1.12572	6.90431	46.2093	1.06271e-11	2.63567e-10
SCARA3	chr8	27633868	27676776	+	1.42614	4.40048	46.186	1.07542e-11	2.66482e-10
KLHL6	chr3	183487531	183555689	-	1.22793	3.59088	46.1598	1.0899e-11	2.69587e-10
CYFIP2	chr5	157266079	157395595	+	1.11763	5.03966	46.1317	1.10568e-11	2.73184e-10
SORCS2	chr4	7192538	7742836	+	1.38614	2.3205	46.1304	1.10641e-11	2.73184e-10
TSPAN11	chr12	30926428	30996599	+	1.24691	3.55999	46.0721	1.13983e-11	2.81185e-10
NKX3-2	chr4	13540830	13545050	-	2.13058	1.36537	46.0636	1.14477e-11	2.82153e-10
AF001548.6	chr16	15741151	15741791	+	2.04111	-2.94478	45.9747	1.19791e-11	2.94988e-10
RP11-400K9.4	chr8	53515171	53523931	-	1.59966	1.61573	45.9616	1.20596e-11	2.96707e-10
SGTB	chr5	65665928	65723035	-	0.679257	3.0679	45.9563	1.20918e-11	2.96972e-10
RP11-244O19.1	chr9	121815674	121819452	-	1.19936	1.66503	45.9163	1.23417e-11	3.02841e-10
ACSM5	chr16	20409534	20441336	+	1.41902	-1.11097	45.9035	1.24226e-11	3.04557e-10
PCDHGA2	chr5	141338760	141512979	+	1.2261	0.958838	45.9015	1.24352e-11	3.04597e-10
CTD-2555O16.4	chr14	64440369	64442238	-	0.816179	0.402799	45.8852	1.25389e-11	3.06866e-10
ZEB2-AS1	chr2	144518097	144521477	+	1.23249	-2.75483	45.8477	1.27812e-11	3.123e-10
SLC22A17	chr14	23346306	23352912	-	1.35715	3.16778	45.8474	1.27835e-11	3.123e-10
HHIP-AS1	chr4	144642922	144661357	-	1.57327	-0.343645	45.7927	1.31456e-11	3.20863e-10
TEK	chr9	27109141	27230175	+	0.931226	3.27126	45.7638	1.33405e-11	3.25335e-10
KLRG1	chr12	8950044	9010760	+	1.06672	0.197617	45.7089	1.372e-11	3.34295e-10
EVI2B	chr17	31303766	31314112	-	1.1651	5.00795	45.6717	1.39827e-11	3.40397e-10
ARHGAP10	chr4	147732063	148072780	+	0.988007	3.88601	45.662	1.40519e-11	3.41782e-10
CTD-2078B5.2	chr5	39520431	39524708	+	1.44778	-3.65112	45.6531	1.41165e-11	3.42838e-10
NRXN1	chr2	49918505	51032561	-	2.44558	0.590707	45.6526	1.41201e-11	3.42838e-10
TNR	chr1	175315194	175743770	-	1.86717	-0.476643	45.6182	1.437e-11	3.48601e-10
SPX	chr12	21526307	21537377	+	2.03526	-2.27076	45.6051	1.44667e-11	3.5064e-10
CXorf36	chrX	45148374	45200901	-	0.899501	3.70675	45.5528	1.48576e-11	3.59801e-10
RP11-281O15.4	chr5	178969390	178990116	+	1.42301	-3.34553	45.5455	1.49136e-11	3.60841e-10
RNLS	chr10	88273864	88584530	-	1.21065	0.663707	45.5319	1.50174e-11	3.63037e-10
CSPG4	chr15	75674322	75712848	-	1.28558	5.91334	45.4894	1.53466e-11	3.70349e-10
PTCH2	chr1	44819844	44843063	-	1.59261	2.23589	45.4339	1.57875e-11	3.80656e-10
RFTN2	chr2	197568224	197676045	-	0.754365	1.78168	45.4224	1.58809e-11	3.82578e-10
AF131217.1	chr21	28439346	28674848	-	1.44368	-2.10097	45.3991	1.60705e-11	3.86809e-10
CITED2	chr6	139371807	139374620	-	0.786743	5.20343	45.3854	1.6184e-11	3.88949e-10
MUSTN1	chr3	52833114	52835219	-	2.61088	-0.13336	45.3849	1.61875e-11	3.88949e-10
APBB1	chr11	6395124	6419414	-	1.19766	3.62568	45.3558	1.64303e-11	3.94442e-10
CLEC1A	chr12	10069554	10111627	-	0.883442	1.03564	45.3009	1.68975e-11	4.05306e-10
GGT5	chr22	24219654	24245142	-	1.10029	5.34901	45.2296	1.7524e-11	4.1997e-10
CACNA2D3	chr3	54122547	55074557	+	1.40486	-0.145355	45.1887	1.78932e-11	4.28078e-10
SMAP2	chr1	40344850	40423326	+	0.711788	5.60178	45.1815	1.79591e-11	4.29284e-10
DLG4	chr17	7189890	7219702	-	0.90819	2.94561	45.1782	1.799e-11	4.29653e-10
CTSG	chr14	24573522	24576260	-	2.19191	-0.173222	45.1233	1.85013e-11	4.41484e-10
S1PR3	chr9	88991447	89005010	+	1.17692	4.94301	45.0293	1.94103e-11	4.6238e-10
RASSF8-AS1	chr12	25939329	25959765	-	1.3482	0.808058	45.0136	1.95675e-11	4.65722e-10
FYCO1	chr3	45917899	45995824	-	0.815405	5.99962	44.9253	2.04698e-11	4.86363e-10
CNN3	chr1	94896949	94927278	-	0.784503	6.31376	44.8979	2.0758e-11	4.92789e-10
FAM65B	chr6	24804282	25042168	-	1.31162	3.15218	44.8831	2.09152e-11	4.96095e-10
STOM	chr9	121338988	121370304	-	0.80416	7.15229	44.881	2.09384e-11	4.96222e-10
NRROS	chr3	196639686	196662004	+	0.924713	2.45865	44.8788	2.09614e-11	4.96343e-10
CNTN2	chr1	205043197	205078499	+	1.99446	-0.58951	44.817	2.16338e-11	5.11828e-10
CLIC4P1	chr9	22747700	22748234	+	1.27096	-2.9472	44.7512	2.23731e-11	5.28867e-10
CLEC2D	chr12	9664969	9699555	+	1.11123	2.96026	44.7483	2.24057e-11	5.29186e-10
FHL5	chr6	96562548	96616636	+	1.1527	0.897812	44.6117	2.40246e-11	5.6694e-10
NPPC	chr2	231921820	231926403	-	2.42412	-1.36213	44.6004	2.41647e-11	5.69762e-10
EPHA5	chr4	65319563	65670495	-	1.73377	-2.15343	44.5566	2.47108e-11	5.82141e-10
IGFBP7-AS1	chr4	57109762	57205510	+	1.509	-3.34031	44.5512	2.47794e-11	5.83262e-10
ABC7-42404400C24.1	chr10	47750864	47763592	-	1.5194	0.0829748	44.4919	2.55406e-11	6.00669e-10
ARHGAP30	chr1	161046946	161069970	-	0.981484	4.46831	44.4865	2.56111e-11	6.01817e-10
SOX17	chr8	54457935	54460888	+	1.02138	1.76112	44.4641	2.59068e-11	6.07735e-10
NXPE3	chr3	101779202	101828229	+	0.829614	3.81621	44.4502	2.60911e-11	6.11541e-10
BTBD6P1	chr1	23901471	23902737	-	2.54281	-2.26029	44.4134	2.65857e-11	6.2248e-10
SLITRK2	chrX	145817832	145825842	+	2.13366	-1.51662	44.4122	2.66027e-11	6.2248e-10
AC092667.2	chr2	100104919	100107504	+	2.47394	-3.40021	44.3579	2.73511e-11	6.38915e-10
ADRB2	chr5	148825245	148828687	+	1.34302	0.741941	44.3468	2.75068e-11	6.4201e-10
AP000473.5	chr21	16630827	16640683	+	2.03734	-3.57715	44.3432	2.75562e-11	6.42623e-10
PHYHIP	chr8	22219704	22232341	-	1.37358	0.89458	44.3036	2.81198e-11	6.55215e-10
BRINP2	chr1	177171497	177282422	+	3.07631	-2.01018	44.1981	2.96763e-11	6.90903e-10
BASP1	chr5	17065598	17276843	+	1.09294	4.50351	44.1864	2.98553e-11	6.94487e-10
LDLRAD4	chr18	13217498	13652755	+	1.00903	4.50302	44.1813	2.99321e-11	6.9569e-10
SNED1	chr2	240998838	241095568	+	0.980082	4.20927	44.1669	3.01545e-11	7.00271e-10
PRPH2	chr6	42696600	42722574	-	1.16328	-0.129031	44.1405	3.05627e-11	7.09156e-10
GLIPR1	chr12	75480680	75503853	+	1.03973	5.21232	44.1345	3.06565e-11	7.10739e-10
ZBTB4	chr17	7459366	7484263	-	0.687797	6.312	44.089	3.13786e-11	7.26873e-10
ZNF667-AS1	chr19	56477250	56500666	+	1.35991	2.03374	44.0784	3.15489e-11	7.30207e-10
EBF2	chr8	25841730	26045397	-	1.4546	1.06464	44.0658	3.17526e-11	7.34309e-10
RASAL3	chr19	15451624	15464571	-	1.07323	3.6012	44.0282	3.23673e-11	7.47901e-10
NR2F1	chr5	93583337	93594615	+	1.23082	4.62656	44.0245	3.24298e-11	7.48721e-10
C4B	chr6	32014762	32035418	+	1.32526	6.74156	44.0159	3.25712e-11	7.51361e-10
RAB8B	chr15	63189469	63267782	+	0.592672	4.69367	44.0029	3.27889e-11	7.55754e-10
ITGA8	chr10	15513949	15720125	-	1.56582	4.12656	43.9999	3.28397e-11	7.56294e-10
MCAM	chr11	119308529	119321521	-	1.01851	6.94635	43.9923	3.29673e-11	7.58604e-10
CCDC178	chr18	32937402	33441101	-	1.61356	-2.26018	43.9826	3.31314e-11	7.61749e-10
SHISA8	chr22	41909554	41914667	-	2.20829	-1.31339	43.9254	3.41127e-11	7.83659e-10
NAP1L5	chr4	88695915	88698235	-	0.950392	1.63534	43.9188	3.42281e-11	7.8566e-10
CCSER2	chr10	84328586	84518521	+	0.642564	5.57019	43.9075	3.44267e-11	7.89564e-10
LDB2	chr4	16501541	16898809	-	0.864339	3.22071	43.8863	3.48019e-11	7.9751e-10
TSHZ3	chr19	31274945	31349547	-	1.15926	3.57754	43.8481	3.54869e-11	8.12537e-10
MYCT1	chr6	152697895	152724567	+	0.833086	2.59156	43.8298	3.58203e-11	8.19493e-10
NTNG1	chr1	107140007	107483458	+	2.18432	-1.238	43.8032	3.63108e-11	8.30029e-10
AP001056.1	chr21	44175489	44176453	+	1.29975	-2.54215	43.7934	3.64926e-11	8.33497e-10
RP11-753H16.3	chr12	54353661	54497688	+	2.7195	-3.31783	43.7898	3.65611e-11	8.34376e-10
RSPO2	chr8	107899316	108083648	-	2.06316	0.792033	43.7708	3.69173e-11	8.41812e-10
SLA	chr8	133036724	133103054	-	1.11123	4.06788	43.7132	3.80206e-11	8.66258e-10
PREX2	chr8	67952118	68237030	+	1.03908	3.23512	43.627	3.97329e-11	9.04528e-10
C16orf54	chr16	29742463	29746006	-	1.33292	1.92742	43.6233	3.98081e-11	9.05494e-10
NRK	chrX	105822543	105958610	+	2.06234	1.61679	43.5687	4.09341e-11	9.30345e-10
TIMD4	chr5	156919282	156963255	-	1.9251	-1.19009	43.5335	4.16768e-11	9.46449e-10
NTN1	chr17	9021542	9244000	+	1.52225	4.73522	43.5178	4.20117e-11	9.53274e-10
P2RX2	chr12	132618780	132622386	+	2.32951	-1.93871	43.5135	4.21047e-11	9.54602e-10
NACC2	chr9	136006537	136095285	-	0.877698	5.51605	43.4968	4.24655e-11	9.61212e-10
CTC-378H22.2	chr19	42152569	42157523	+	1.69001	-1.06665	43.4913	4.25847e-11	9.63122e-10
TBC1D19	chr4	26576437	26755351	+	0.673507	1.64434	43.4612	4.32444e-11	9.77245e-10
GPSM3	chr6	32190766	32195523	-	0.922126	4.00373	43.4446	4.36134e-11	9.8398e-10
PDE1B	chr12	54549350	54579239	+	1.29623	2.10147	43.3952	4.47283e-11	1.00831e-09
PRRG3	chrX	151695124	151705924	+	1.44665	-0.305005	43.3869	4.49179e-11	1.01176e-09
GYPE	chr4	143870867	143905563	-	1.30395	-2.17052	43.3211	4.64555e-11	1.04555e-09
RAMP3	chr7	45157791	45186302	+	0.946169	3.22199	43.2866	4.7282e-11	1.06329e-09
RP11-18H21.1	chr4	152100754	152104720	+	1.56543	-1.48288	43.2847	4.73281e-11	1.06346e-09
ABI3	chr17	49210227	49223225	+	0.903146	3.78489	43.2693	4.77002e-11	1.07096e-09
SLC25A53	chrX	104099214	104157027	-	0.603972	1.58249	43.2498	4.81786e-11	1.08082e-09
FGD2	chr6	37005646	37029070	+	1.01383	3.15509	43.1991	4.94426e-11	1.10828e-09
CD53	chr1	110873154	110899928	+	1.09129	5.17549	43.1764	5.00212e-11	1.12034e-09
ACTA1	chr1	229431245	229434098	-	2.20482	-1.4435	43.1607	5.04224e-11	1.12842e-09
ADAP2	chr17	30906344	30959322	+	0.774903	3.53765	43.1445	5.08431e-11	1.136e-09
PEG3	chr19	56810083	56840728	-	1.67815	2.10611	43.135	5.10895e-11	1.14059e-09
EBI3	chr19	4229498	4237531	+	1.28207	1.32664	43.0621	5.30286e-11	1.18293e-09
RP11-475B2.1	chr4	173593672	173594556	+	2.63188	-4.00985	43.0515	5.33164e-11	1.18839e-09
RP11-428G5.5	chr12	31877079	31887203	-	2.18357	-2.186	43.0217	5.41368e-11	1.20377e-09
OPRL1	chr20	64080173	64100643	+	1.18486	0.52509	42.9899	5.50218e-11	1.22247e-09
PLCD4	chr2	218607765	218637184	+	1.05495	1.56766	42.9847	5.51693e-11	1.22477e-09
SLC22A1	chr6	160121789	160158718	+	1.42533	-1.52679	42.9585	5.59128e-11	1.24028e-09
ITGBL1	chr13	101452593	101720856	+	1.59807	4.59649	42.9441	5.63268e-11	1.24846e-09
TNFSF8	chr9	114893343	114930595	-	1.21178	1.15809	42.9373	5.65214e-11	1.25178e-09
SCG5	chr15	32641676	32697098	+	1.25427	1.6873	42.9311	5.67021e-11	1.25478e-09
TNFAIP8	chr5	119268692	119399688	+	0.798504	4.32166	42.9238	5.69148e-11	1.25848e-09
FAM20A	chr17	68535113	68601389	-	1.12745	2.87259	42.9052	5.74579e-11	1.26948e-09
HIVEP3	chr1	41506365	42035925	-	0.863925	3.9581	42.8887	5.79438e-11	1.27907e-09
CMA1	chr14	24505353	24508265	-	2.59103	-1.61902	42.8873	5.79844e-11	1.27907e-09
GPR65	chr14	88005124	88014811	+	1.02114	2.01195	42.8643	5.86719e-11	1.29321e-09
GJA5	chr1	147756199	147773362	-	0.904751	3.1517	42.8586	5.88426e-11	1.29594e-09
ARMCX2	chrX	101655281	101659891	-	1.12368	3.4565	42.8481	5.91582e-11	1.30186e-09
C3orf18	chr3	50558025	50571027	-	1.00242	1.38938	42.8463	5.92146e-11	1.30206e-09
GAP43	chr3	115623324	115721490	+	1.84369	-0.219183	42.8095	6.03382e-11	1.32572e-09
PIP5K1C	chr19	3630183	3700479	-	0.604976	6.30001	42.7646	6.174e-11	1.35545e-09
SEPT4	chr17	58520250	58540818	-	0.843487	2.5086	42.7538	6.20802e-11	1.36183e-09
CD69	chr12	9752486	9760901	-	1.22592	2.47236	42.7295	6.28568e-11	1.37778e-09
CD48	chr1	160678746	160711851	-	1.24707	3.91913	42.6893	6.41629e-11	1.4053e-09
DCX	chrX	111293780	111412375	-	2.63004	0.369115	42.6677	6.4876e-11	1.4198e-09
AC011239.2	chr2	23616499	23617987	-	1.63344	-2.56288	42.6439	6.56703e-11	1.43605e-09
GNG13	chr16	798041	800733	-	2.83568	-1.61008	42.6419	6.57351e-11	1.43633e-09
RP11-445F6.2	chr6	139271362	139287307	+	2.40078	-3.37388	42.6305	6.61199e-11	1.4436e-09
SELL	chr1	169690667	169711698	-	1.33368	4.01239	42.622	6.64098e-11	1.44879e-09
BACE1	chr11	117285207	117316259	-	0.724856	5.00739	42.5993	6.71842e-11	1.46453e-09
PMP2	chr8	81440326	81447523	-	2.41869	-1.93505	42.5764	6.79752e-11	1.48061e-09
DPP6	chr7	153887097	154894285	+	2.72711	0.901392	42.5703	6.81859e-11	1.48398e-09
LINC01082	chr16	86196181	86199720	+	1.69122	-0.836492	42.5689	6.82368e-11	1.48398e-09
GLRB	chr4	157076057	157172090	+	1.36698	0.820122	42.5524	6.88129e-11	1.49423e-09
LRRC18	chr10	48909483	48935190	-	1.71132	-2.89641	42.5523	6.8816e-11	1.49423e-09
ARL4D	chr17	43398959	43401137	+	1.53716	1.56907	42.5477	6.89797e-11	1.49661e-09
MYO5A	chr15	52307283	52529050	-	0.859491	4.5539	42.4915	7.09892e-11	1.5378e-09
RAB30	chr11	82973133	83071923	-	0.801558	4.08079	42.4848	7.12345e-11	1.54191e-09
SLC45A1	chr1	8317826	8344167	+	1.07668	0.592948	42.4376	7.2974e-11	1.57833e-09
SLC26A10	chr12	57619527	57626151	+	1.43181	-1.46346	42.4142	7.38532e-11	1.59486e-09
CLEC11A	chr19	50723329	50725718	+	1.07274	3.43459	42.4011	7.43496e-11	1.60433e-09
PGM5P4-AS1	chr2	113527568	113542672	-	1.9249	-1.9787	42.3746	7.53635e-11	1.62494e-09
CLEC4F	chr2	70808643	70820600	-	1.59215	-2.47737	42.3723	7.5451e-11	1.62557e-09
CTD-2020K17.1	chr17	45190931	45222222	-	1.04972	0.821541	42.3688	7.55855e-11	1.6272e-09
MARVELD1	chr10	97713173	97718152	+	0.88461	5.65486	42.3365	7.68459e-11	1.65305e-09
NOS1	chr12	117208142	117452170	-	2.42693	0.0321551	42.3132	7.77676e-11	1.67158e-09
FBLN7	chr2	112138385	112188216	+	1.07529	0.974921	42.2923	7.86031e-11	1.68823e-09
SCARA5	chr8	27869882	27992727	-	1.90035	2.34806	42.2654	7.96888e-11	1.71023e-09
NLGN2	chr17	7404874	7419860	+	0.956712	4.44822	42.2617	7.98411e-11	1.71217e-09
UTS2B	chr3	191267168	191330536	-	1.43942	-1.59999	42.2267	8.12825e-11	1.74173e-09
MYBPH	chr1	203167811	203175813	-	3.41714	-1.19729	42.2116	8.19127e-11	1.75388e-09
FAM78A	chr9	131258076	131276547	-	0.909766	3.16144	42.1532	8.43951e-11	1.80425e-09
BZRAP1-AS1	chr17	58325450	58415766	+	1.27808	0.747324	42.1112	8.62278e-11	1.84201e-09
SEMA3G	chr3	52433053	52445085	-	0.993661	3.14691	42.1055	8.64789e-11	1.84595e-09
CBX6	chr22	38861450	38872314	-	1.17149	5.80982	42.0376	8.95346e-11	1.9097e-09
RCBTB2	chr13	48488959	48533256	-	0.695931	3.14818	42.0104	9.07913e-11	1.93502e-09
AC109642.1	chr2	30346659	30352431	+	1.21649	-1.56423	42.0033	9.11194e-11	1.94052e-09
GOLGA8R	chr15	30403740	30414162	-	1.00074	-0.300165	41.9973	9.13981e-11	1.94496e-09
RILPL1	chr12	123470054	123533718	-	0.684336	3.10122	41.9395	9.41395e-11	2.00176e-09
PKD1	chr16	2088710	2135898	-	0.840199	6.59761	41.9211	9.5031e-11	2.01917e-09
GIMAP1-GIMAP5	chr7	150716557	150743649	+	1.15418	2.19758	41.9138	9.53878e-11	2.0252e-09
P2RY10	chrX	78945332	78961954	+	1.364	1.71621	41.9086	9.56407e-11	2.02803e-09
RP11-399B17.1	chr2	112188364	112190635	+	1.16998	-0.839867	41.8833	9.68866e-11	2.05231e-09
SELM	chr22	31104772	31120069	-	1.12827	5.73552	41.8136	1.00403e-10	2.12517e-09
IGFBP4	chr17	40443461	40457731	+	1.15712	8.71269	41.7766	1.02322e-10	2.1625e-09
RP11-175K6.2	chr5	159106380	159108617	+	1.04884	-0.688744	41.7534	1.03541e-10	2.18659e-09
FGF14	chr13	101710804	102402457	-	1.61175	1.26853	41.7509	1.03674e-10	2.18774e-09
GIMAP5	chr7	150722253	150750033	+	0.992093	2.95123	41.7484	1.03808e-10	2.18888e-09
CTD-3116E22.8	chr19	9721903	9722410	+	2.13208	-3.86409	41.7277	1.04914e-10	2.20896e-09
RP5-887A10.1	chr1	80535755	80646788	+	2.20976	-1.44648	41.7276	1.04919e-10	2.20896e-09
RP5-1171I10.5	chr17	58330884	58332508	-	1.34628	0.398685	41.6532	1.08984e-10	2.29107e-09
C10orf105	chr10	71711701	71737824	-	1.65471	-2.2053	41.646	1.09391e-10	2.29643e-09
PMP22	chr17	15229777	15265326	-	0.894957	5.87221	41.6457	1.09405e-10	2.29643e-09
AC023590.1	chr8	118282139	118400605	+	1.31013	-2.32683	41.6438	1.09512e-10	2.29694e-09
SOD3	chr4	24789912	24800842	+	1.30147	6.31623	41.6396	1.09746e-10	2.3001e-09
C1QL1	chr17	44959693	44968071	-	1.55692	1.06979	41.6264	1.1049e-10	2.31396e-09
LY9	chr1	160796074	160828261	+	1.40884	1.90407	41.5828	1.12985e-10	2.36441e-09
FNDC5	chr1	32862268	32872482	-	1.56712	0.603158	41.5778	1.13274e-10	2.36866e-09
ABCD2	chr12	39550033	39619751	-	1.28376	0.347287	41.5555	1.14569e-10	2.39396e-09
DNM1P47	chr15	101751032	101794302	+	1.44456	-2.01607	41.5502	1.14884e-10	2.39873e-09
PTH1R	chr3	46877746	46903799	+	1.32728	-0.492139	41.4777	1.19224e-10	2.4856e-09
PPFIA2	chr12	81257975	81759553	-	1.3336	-0.258881	41.4752	1.19378e-10	2.48694e-09
MAFB	chr20	40685848	40689240	-	0.944266	5.14105	41.4329	1.21987e-10	2.53939e-09
MYO9A	chr15	71822289	72118577	-	0.606992	4.9341	41.4279	1.22298e-10	2.54394e-09
RP11-693M3.1	chr18	44986109	44989203	+	1.57778	-1.2106	41.3597	1.2664e-10	2.63229e-09
GYG1	chr3	148991341	149027668	+	0.626996	5.30353	41.3388	1.28004e-10	2.65864e-09
PLA2G4C	chr19	48047843	48110817	-	1.13482	2.62784	41.2899	1.31246e-10	2.72191e-09
PPM1M	chr3	52245793	52250597	+	0.66998	3.39175	41.2642	1.32983e-10	2.75586e-09
VCAM1	chr1	100719742	100739045	+	0.99261	4.71856	41.249	1.34021e-10	2.7753e-09
ISL1	chr5	51383391	51394738	+	1.38005	1.91051	41.2204	1.35999e-10	2.81416e-09
TLR1	chr4	38790677	38856817	-	1.02328	2.66946	41.2157	1.36323e-10	2.81877e-09
MDGA1	chr6	37630679	37699306	-	1.11176	2.32118	41.2015	1.37316e-10	2.83718e-09
AC104654.2	chr2	41931599	41933723	-	1.48962	-2.03419	41.182	1.38694e-10	2.86139e-09
GVINP1	chr11	6713536	6746439	-	1.21422	2.95677	41.1497	1.41002e-10	2.90253e-09
KIRREL	chr1	157993273	158100262	+	0.871869	5.51911	41.1111	1.43816e-10	2.95826e-09
VCL	chr10	73995193	74121363	+	0.79433	7.94494	41.1087	1.43992e-10	2.95969e-09
AVPR2	chrX	153902531	153907166	+	1.35159	-0.561506	41.0912	1.4529e-10	2.98414e-09
CTSK	chr1	150796208	150808323	-	0.983437	5.95616	41.0316	1.49791e-10	3.07432e-09
TTC7B	chr14	90524564	90816479	-	0.846559	3.57425	41.0147	1.51086e-10	3.09861e-09
FKBP7	chr2	178463664	178478600	-	0.742594	3.2236	41.0107	1.514e-10	3.10275e-09
CLEC4G	chr19	7728957	7733906	-	1.75899	-2.27654	40.995	1.5262e-10	3.12544e-09
TGM4	chr3	44874608	44914990	+	4.04271	-0.532553	40.9897	1.53033e-10	3.13159e-09
RP11-494K3.2	chr1	204946608	204947169	+	1.85355	-3.53048	40.9494	1.56224e-10	3.19454e-09
SH2D3C	chr9	127738317	127778741	-	0.810811	3.77877	40.9231	1.58342e-10	3.23544e-09
NCF1B	chr7	73220624	73235945	+	1.33301	1.43549	40.8696	1.62736e-10	3.31831e-09
TMEM119	chr12	108589846	108598320	-	1.17916	4.6174	40.8693	1.62756e-10	3.31831e-09
PDE8B	chr5	77210449	77429807	+	0.94234	2.15079	40.8652	1.63098e-10	3.32284e-09
RBMS3-AS3	chr3	29264194	29290726	-	1.7774	-3.65656	40.8606	1.63486e-10	3.3283e-09
AP001347.6	chr21	14027421	14144468	+	1.61478	-1.37436	40.8376	1.65416e-10	3.36511e-09
NR2F2-AS1	chr15	96110040	96327361	-	1.25289	-0.614452	40.8182	1.6707e-10	3.39628e-09
KIAA1755	chr20	38210488	38260772	-	1.04743	2.96351	40.802	1.68462e-10	3.42207e-09
PPP1R3C	chr10	91628442	91633054	-	1.63233	2.57033	40.7885	1.69627e-10	3.44068e-09
PALMD	chr1	99645943	99694541	+	1.07244	3.17059	40.7629	1.71869e-10	3.48361e-09
CHRM2	chr7	136868669	137020255	+	2.77221	2.60516	40.7542	1.72629e-10	3.49645e-09
TMEM110-MUSTN1	chr3	52833121	52897562	-	0.640778	2.01167	40.7084	1.76724e-10	3.57679e-09
LAIR1	chr19	54351384	54370558	-	0.961403	4.46731	40.6918	1.78229e-10	3.60199e-09
RP11-701H24.4	chr15	25087661	25088896	+	1.71922	-2.10007	40.6881	1.78575e-10	3.60635e-09
NLRC3	chr16	3539033	3577400	-	1.03562	3.08596	40.674	1.79861e-10	3.62908e-09
CHODL	chr21	17901263	18267373	+	2.14585	-0.772915	40.6729	1.79962e-10	3.62908e-09
ABCA1	chr9	104781002	104928237	-	0.808928	5.41314	40.6623	1.80949e-10	3.64367e-09
COL15A1	chr9	98943179	99070792	+	0.986059	7.31536	40.6162	1.85264e-10	3.72787e-09
AC025165.8	chr12	57612118	57619638	-	1.61923	-2.1	40.6058	1.86255e-10	3.74238e-09
LRRC32	chr11	76657524	76670747	-	0.972744	5.77444	40.5897	1.87789e-10	3.77047e-09
ADORA3	chr1	111499429	111503760	-	1.22063	1.6735	40.588	1.87954e-10	3.77105e-09
BAALC	chr8	103140710	103230305	+	1.65183	0.548231	40.5863	1.8812e-10	3.77164e-09
TMEM245	chr9	109015152	109119945	-	0.678769	6.53312	40.5828	1.88458e-10	3.77569e-09
TRABD2B	chr1	47760528	47996895	-	1.36267	2.17941	40.5416	1.92474e-10	3.85336e-09
RHOB	chr2	20447074	20449445	+	0.949712	8.06164	40.5397	1.92666e-10	3.85443e-09
RP4-671O14.5	chr22	44183031	44187739	-	1.37223	-1.26914	40.5146	1.95155e-10	3.90107e-09
TCEAL3	chrX	103607451	103629690	+	0.953075	3.29396	40.5133	1.95279e-10	3.90107e-09
ETS1	chr11	128458761	128587558	-	0.733519	6.50461	40.4949	1.97129e-10	3.93519e-09
TAGAP	chr6	159034468	159045152	-	1.12927	3.3226	40.4925	1.9737e-10	3.93717e-09
SFRP4	chr7	37905932	38025695	-	1.80383	6.41877	40.4573	2.00956e-10	4.00582e-09
CNTNAP3P2	chr9	67059560	67293468	+	1.69756	-1.38301	40.4486	2.01859e-10	4.02094e-09
FLRT1	chr11	64103188	64119173	+	1.43412	-0.0220395	40.4426	2.02478e-10	4.03037e-09
SRPX2	chrX	100644218	100671299	+	1.03145	3.20172	40.4324	2.03541e-10	4.04863e-09
ADAMTS3	chr4	72280969	72568799	-	1.00442	0.281208	40.4291	2.03882e-10	4.05249e-09
NCF4	chr22	36860988	36878015	+	1.02356	3.08248	40.4059	2.06318e-10	4.09799e-09
ISLR	chr15	74173671	74176872	+	1.32023	6.33078	40.3918	2.07815e-10	4.12477e-09
PLCL1	chr2	197804702	198572581	+	0.950182	2.12258	40.3882	2.08198e-10	4.1294e-09
DOCK10	chr2	224765090	225042445	-	0.972546	3.9193	40.3772	2.09366e-10	4.1496e-09
TSPAN2	chr1	115048011	115089500	-	1.39285	3.70462	40.3374	2.13679e-10	4.22904e-09
AP1S2	chrX	15825806	15855014	-	0.889347	4.48518	40.2881	2.19139e-10	4.32784e-09
SMYD1	chr2	88067780	88113387	+	3.8407	2.81786	40.2802	2.20032e-10	4.34238e-09
RBP5	chr12	7123684	7128942	-	1.18183	1.12139	40.2687	2.21322e-10	4.36473e-09
MS4A4A	chr11	60280541	60308972	+	1.08495	3.29414	40.2673	2.21489e-10	4.36492e-09
SLC1A2	chr11	35251206	35420063	-	1.67504	1.10896	40.175	2.32205e-10	4.57286e-09
LTBP2	chr14	74498170	74612378	-	1.00126	6.88664	40.1482	2.35404e-10	4.63256e-09
RBM43	chr2	151247940	151261879	-	0.698823	2.98616	40.0798	2.438e-10	4.79438e-09
PRDM8	chr4	80183879	80204329	+	1.21378	1.99182	40.0572	2.4663e-10	4.8466e-09
RP11-89K11.1	chr15	101737099	101745710	-	1.26082	-2.48869	40.0536	2.47087e-10	4.85214e-09
MAP7D1	chr1	36155579	36180849	+	0.65298	6.57206	40.0348	2.49484e-10	4.89574e-09
CD300LB	chr17	74521174	74531474	-	1.13627	-0.567435	40.0086	2.52845e-10	4.95819e-09
LRRC3B	chr3	26622806	26710776	+	1.78398	-3.35152	39.976	2.57102e-10	5.03099e-09
AC002398.12	chr19	35754566	35755490	+	2.99406	0.341102	39.9655	2.5849e-10	5.05459e-09
TDRD10	chr1	154502219	154548147	+	1.11056	-1.28546	39.9593	2.59305e-10	5.06695e-09
DIO2	chr14	80197527	80387757	-	1.09239	5.28774	39.951	2.60412e-10	5.08501e-09
RP11-156P1.3	chr17	46984045	47100323	-	0.706644	1.99144	39.9467	2.60983e-10	5.09257e-09
RP11-796E2.4	chr12	92145573	92189660	+	1.28372	-1.05715	39.904	2.66752e-10	5.19783e-09
SH3PXD2B	chr5	172325181	172454523	-	0.803319	5.93978	39.8771	2.70452e-10	5.26621e-09
KIAA0125	chr14	105917979	105932642	+	1.72363	1.30901	39.8459	2.74811e-10	5.34734e-09
TNFRSF13B	chr17	16929816	16972118	-	1.82932	0.372805	39.8396	2.75703e-10	5.36094e-09
KIAA1614	chr1	180913154	180951614	+	0.898044	2.07343	39.8133	2.79433e-10	5.42585e-09
SYNPO	chr5	150601080	150659220	+	0.953147	7.08844	39.7655	2.86357e-10	5.5564e-09
NTAN1	chr16	15037853	15056079	-	0.614526	4.1579	39.6884	2.97885e-10	5.77202e-09
CNTN1	chr12	40692442	41072418	+	2.17246	2.785	39.6708	3.00581e-10	5.8202e-09
STMN4	chr8	27235323	27258420	-	2.16053	-3.36022	39.6294	3.07027e-10	5.94085e-09
HLA-DOB	chr6	32812763	32817048	-	1.46742	1.74857	39.6185	3.08742e-10	5.96986e-09
PCDHGB6	chr5	141408021	141512979	+	1.10496	2.10236	39.6168	3.0901e-10	5.9709e-09
PHACTR1	chr6	12716805	13290484	+	1.00521	2.66959	39.5434	3.20848e-10	6.19532e-09
POU2AF1	chr11	111352252	111455630	-	1.53732	4.63113	39.5304	3.22985e-10	6.23086e-09
JPH4	chr14	23568035	23578800	-	1.2472	-0.75311	39.5295	3.23138e-10	6.23086e-09
RP11-182J1.17	chr15	84599434	84606463	-	1.48523	-4.00739	39.5115	3.26139e-10	6.28436e-09
SLCO1C1	chr12	20695355	20753386	+	1.1452	-1.47462	39.4895	3.2982e-10	6.34597e-09
RGMB-AS1	chr5	98769618	98773469	-	1.14847	-0.532704	39.4887	3.29962e-10	6.34597e-09
GZMK	chr5	55024253	55034570	+	1.53774	2.27814	39.4883	3.30024e-10	6.34597e-09
TNFAIP8L2	chr1	151156629	151159749	+	0.911306	1.57805	39.4693	3.3326e-10	6.39766e-09
FAM180A	chr7	135728348	135748846	-	1.53415	0.827617	39.4684	3.33404e-10	6.39766e-09
RP4-613B23.1	chr3	42601963	42654388	-	1.23292	-2.69321	39.4513	3.36344e-10	6.44532e-09
SALL2	chr14	21521081	21537216	-	1.47331	2.46294	39.4513	3.36352e-10	6.44532e-09
ATP2B3	chrX	153517676	153582939	+	2.47353	-2.95616	39.4168	3.42346e-10	6.55564e-09
TCEAL2	chrX	102125688	102127711	+	2.69755	1.71139	39.4054	3.44352e-10	6.58951e-09
GXYLT2	chr3	72888073	72998138	+	1.31168	2.99958	39.4015	3.45033e-10	6.59799e-09
RP11-368J22.2	chr15	93065586	93066606	-	2.49522	-3.12562	39.3859	3.47793e-10	6.64618e-09
TMEM130	chr7	98846488	98870771	-	1.67608	1.18104	39.3588	3.5266e-10	6.73454e-09
CTD-2270F17.1	chr5	170389493	170422844	+	2.05989	-3.90041	39.3532	3.53667e-10	6.74496e-09
RP11-1334A24.6	chr5	177494995	177503647	+	1.13433	-1.5236	39.3531	3.53692e-10	6.74496e-09
AC016995.3	chr2	38406719	38515740	-	1.9052	-3.02229	39.3024	3.62989e-10	6.9175e-09
RP11-815J4.6	chr18	12073232	12076654	-	1.18795	-1.77578	39.3003	3.6339e-10	6.92039e-09
BGN	chrX	153494939	153509554	+	1.06644	8.89573	39.2967	3.64057e-10	6.92833e-09
SPOCK1	chr5	136975298	137598379	-	1.55353	4.91655	39.2928	3.64779e-10	6.93045e-09
ELK3	chr12	96194382	96269835	+	0.631223	5.91256	39.2921	3.64918e-10	6.93045e-09
GMFG	chr19	39328353	39342372	-	0.827993	3.07157	39.2873	3.65813e-10	6.94269e-09
VGLL3	chr3	86937969	86991119	-	1.2603	3.70636	39.2519	3.72503e-10	7.06482e-09
ITGB3	chr17	47253846	47311816	+	1.04451	3.24999	39.2352	3.75714e-10	7.12085e-09
PCDHB15	chr5	141245349	141249365	+	1.11263	1.59841	39.2167	3.79283e-10	7.18358e-09
FAM127C	chrX	135020504	135022529	-	0.989252	3.03972	39.2144	3.79736e-10	7.1836e-09
CTD-2536I1.2	chr15	95280753	95284249	-	1.41829	-1.59358	39.2137	3.79872e-10	7.1836e-09
CD34	chr1	207880972	207911402	-	0.785115	5.76893	39.2127	3.80061e-10	7.1836e-09
DHH	chr12	49089421	49094819	-	1.22142	-1.09456	39.207	3.81166e-10	7.19957e-09
HECTD2	chr10	91409280	91514829	+	0.836917	3.03464	39.1949	3.83538e-10	7.23634e-09
CSF1R	chr5	150053291	150113372	-	1.03588	5.51269	39.1944	3.83635e-10	7.23634e-09
KB-1517D11.4	chr8	98436669	98439290	+	1.75826	-3.42889	39.1758	3.87318e-10	7.29936e-09
BANK1	chr4	101411286	102074812	+	1.38178	3.19718	39.1748	3.87502e-10	7.29936e-09
RP11-21C4.1	chr8	64574306	64581888	-	1.51596	-3.07615	39.1153	3.99495e-10	7.51506e-09
RP11-236L14.2	chr15	96080713	96084584	-	1.55372	-2.59669	39.1119	4.00191e-10	7.52304e-09
RBM24	chr6	17281346	17293875	+	1.68138	0.731489	39.0996	4.02732e-10	7.56569e-09
ACAP1	chr17	7336529	7351478	+	0.999849	3.14427	39.0819	4.06392e-10	7.62411e-09
FAXC	chr6	99271169	99350062	-	1.83516	1.83926	39.0622	4.10516e-10	7.69627e-09
SEZ6L	chr22	26169474	26383597	+	2.16881	0.316075	39.0398	4.1526e-10	7.77996e-09
OSR1	chr2	19351485	19358653	-	1.52209	1.78459	39.0349	4.16303e-10	7.79422e-09
SWAP70	chr11	9664077	9752991	+	0.603142	5.48346	39.0073	4.22228e-10	7.89982e-09
HSD3BP5	chr1	119601340	119609250	+	2.05192	-1.99382	38.9924	4.2546e-10	7.95493e-09
DRP2	chrX	101219769	101264497	+	1.31989	-0.0464295	38.9627	4.31991e-10	8.0716e-09
SHC4	chr15	48823735	48963444	-	1.23426	0.26106	38.9463	4.35615e-10	8.13382e-09
AC002480.3	chr7	22563337	22573996	+	1.49501	-2.19624	38.9391	4.37244e-10	8.15875e-09
HSPA2	chr14	64535905	64546173	+	1.24305	3.87986	38.9286	4.39593e-10	8.19706e-09
LHFPL2	chr5	78485215	78770021	-	0.659227	5.66379	38.9086	4.44109e-10	8.27571e-09
PDGFRL	chr8	17576433	17644071	+	1.34064	2.0089	38.8934	4.4759e-10	8.33497e-09
RNF217	chr6	124962545	125092633	+	1.0279	3.24386	38.8674	4.53589e-10	8.44101e-09
THBS1	chr15	39581079	39599466	+	1.10067	8.62687	38.8445	4.58934e-10	8.53476e-09
OLFM3	chr1	101802574	101997030	-	2.80699	-3.72166	38.8356	4.61045e-10	8.56827e-09
SDC2	chr8	96493351	96611780	+	0.825383	5.37201	38.777	4.75093e-10	8.81752e-09
RP11-1070N10.3	chr14	95516136	95517911	+	1.61755	-1.97424	38.7652	4.77967e-10	8.86493e-09
CYLD	chr16	50742050	50801935	+	0.584026	5.04537	38.7479	4.82231e-10	8.93803e-09
CR1	chr1	207496147	207640647	+	1.48967	2.7585	38.7398	4.84246e-10	8.96938e-09
C8orf48	chr8	13566843	13568287	+	1.03106	-1.71516	38.734	4.85675e-10	8.98985e-09
EFS	chr14	23356402	23365752	-	1.1376	2.3849	38.7285	4.87047e-10	9.00923e-09
COL6A3	chr2	237324003	237414375	-	1.01176	9.44457	38.7243	4.88087e-10	9.02245e-09
PTGER1	chr19	14472466	14475362	-	1.53277	1.13234	38.6797	4.99376e-10	9.22499e-09
KIRREL3	chr11	126423359	127003460	-	1.55299	-1.19721	38.6726	5.01193e-10	9.24841e-09
RP11-733O18.1	chrX	5653421	5726305	-	1.40206	-3.03006	38.6721	5.01311e-10	9.24841e-09
HDX	chrX	84317874	84502479	-	1.0355	0.484937	38.6555	5.05617e-10	9.32164e-09
RP11-21A7A.2	chr11	64035970	64103653	+	2.78382	-3.41596	38.6207	5.14707e-10	9.48292e-09
SH3BP5	chr3	15254853	15341368	-	0.754504	4.4038	38.5311	5.38873e-10	9.91497e-09
CTC-510F12.2	chr19	11203628	11216168	+	1.08361	-1.96846	38.4934	5.49378e-10	1.01016e-08
VASH1	chr14	76762189	76783015	+	0.708762	4.6328	38.4819	5.52647e-10	1.01549e-08
STAB1	chr3	52495338	52524495	+	0.81859	5.71516	38.4755	5.5445e-10	1.01813e-08
ITGB2-AS1	chr21	44921051	44929678	+	1.26749	0.456688	38.4517	5.61268e-10	1.02997e-08
ROBO1	chr3	78597240	79767815	-	0.895288	5.16177	38.4343	5.66296e-10	1.03851e-08
AC025048.1	chr17	60102183	60102662	-	1.61998	-2.18433	38.4316	5.67082e-10	1.03926e-08
GPR162	chr12	6821545	6829972	+	0.934924	0.343213	38.3887	5.79681e-10	1.05955e-08
GCSAM	chr3	112120841	112133305	-	1.07747	1.27441	38.3697	5.85354e-10	1.06922e-08
CYTL1	chr4	5014586	5019472	-	1.23953	-0.156894	38.3368	5.95289e-10	1.08665e-08
NBEA	chr13	34942287	35673022	+	1.58358	3.25706	38.2825	6.12099e-10	1.11586e-08
KCNMA1-AS1	chr10	76888044	76980624	+	1.67377	-3.22599	38.1752	6.46687e-10	1.17814e-08
CC2D2A	chr4	15469865	15601557	+	0.964553	3.11267	38.1737	6.47183e-10	1.17827e-08
EIF4E3	chr3	71675416	71754773	-	0.793713	4.59416	38.1623	6.50996e-10	1.18444e-08
MMP23B	chr1	1632095	1701810	+	1.13545	2.20851	38.1063	6.69937e-10	1.21739e-08
CAMK1	chr3	9757342	9769992	-	0.783632	3.30405	38.1042	6.70657e-10	1.21781e-08
CTD-2353F22.1	chr5	36666214	36725195	-	1.41371	-2.58228	38.0901	6.75523e-10	1.22584e-08
NKX2-5	chr5	173232109	173235357	-	3.35274	0.357708	38.0831	6.77937e-10	1.22942e-08
CD28	chr2	203706475	203738912	+	1.09564	2.02325	38.0738	6.81176e-10	1.23449e-08
PDE5A	chr4	119494395	119628991	-	0.964287	5.16869	38.0682	6.83134e-10	1.23723e-08
C14orf28	chr14	44897295	44907257	+	0.595001	2.13053	37.9802	7.1467e-10	1.2935e-08
ARHGAP22	chr10	48446034	48656265	-	0.92027	1.28159	37.9566	7.23357e-10	1.30836e-08
HSPA12B	chr20	3732667	3753111	+	0.861453	2.75314	37.9105	7.40653e-10	1.33878e-08
HTRA1	chr10	122461525	122514908	+	0.880331	6.13706	37.9079	7.41642e-10	1.33969e-08
TBC1D27	chr17	16922915	16934839	-	1.87556	-0.879252	37.8958	7.46259e-10	1.34715e-08
XXbac-BPG13B8.10	chr6	29497509	29510556	+	1.94696	-3.60275	37.8907	7.48201e-10	1.34978e-08
PNCK	chrX	153669730	153689010	-	2.35093	2.05752	37.8875	7.49447e-10	1.35115e-08
CYTH4	chr22	37282027	37315345	+	0.928561	3.55092	37.8668	7.57434e-10	1.36466e-08
CDH23	chr10	71396934	71815947	+	1.33644	1.73108	37.8325	7.70877e-10	1.38798e-08
NFIA	chr1	60865259	61462793	+	0.82274	6.11449	37.8027	7.82732e-10	1.40841e-08
C1orf54	chr1	150268200	150280916	+	0.643415	1.9767	37.7512	8.03686e-10	1.44424e-08
BMP3	chr4	81030965	81057531	+	2.67189	2.13885	37.7419	8.07528e-10	1.4502e-08
MYL6	chr12	56158161	56163496	+	0.628096	8.89259	37.7065	8.22321e-10	1.47581e-08
PWAR5	chr15	24985053	24988232	+	1.56218	-0.213171	37.7049	8.22988e-10	1.47606e-08
RP4-663N10.1	chr1	115283034	115368072	+	2.46125	-4.26344	37.6817	8.32833e-10	1.49181e-08
ITIH3	chr3	52794768	52809009	+	1.41863	0.137959	37.6735	8.36309e-10	1.49704e-08
GPR68	chr14	91232532	91253925	-	0.897044	3.06647	37.6496	8.46644e-10	1.51456e-08
PECAM1	chr17	64319415	64413776	-	0.787006	7.1929	37.629	8.55617e-10	1.52963e-08
RP11-1260E13.4	chr17	331205	333488	+	1.07905	-1.64328	37.6225	8.58489e-10	1.53378e-08
PRCAT47	chr16	80828735	80892595	-	1.32556	-2.17215	37.5461	8.92795e-10	1.59404e-08
CIDEA	chr18	12254319	12277595	+	3.27161	-1.92683	37.5324	8.99057e-10	1.60419e-08
NT5C1A	chr1	39659121	39672038	-	2.02286	-3.86681	37.5053	9.11671e-10	1.62565e-08
CAMK4	chr5	111223653	111494886	+	0.996848	2.25994	37.4524	9.36715e-10	1.66923e-08
ZCCHC5	chrX	78656069	78659328	-	2.21229	-1.94437	37.4415	9.41975e-10	1.67645e-08
GALR1	chr18	77250549	77277896	+	2.1436	-2.86338	37.4345	9.45326e-10	1.68133e-08
SYNDIG1	chr20	24469199	24666616	+	1.21677	1.99358	37.4052	9.59675e-10	1.70467e-08
KCTD12	chr13	76880166	76886390	-	1.00958	7.20272	37.4032	9.60626e-10	1.70526e-08
LRRC8C	chr1	89633072	89769903	+	0.657534	4.29875	37.3928	9.6577e-10	1.7133e-08
TCL1A	chr14	95709967	95714196	-	2.5497	1.58867	37.3583	9.83006e-10	1.74276e-08
CLIP4	chr2	29097705	29189643	+	1.06102	3.54746	37.3121	1.00656e-09	1.78338e-08
TICAM2	chr5	115578650	115602479	-	0.851031	1.70134	37.2755	1.02564e-09	1.81487e-08
EPYC	chr12	90963679	91005026	-	2.83079	0.0639824	37.2293	1.05023e-09	1.85719e-08
HACD1	chr10	17589032	17617377	-	1.38533	1.54307	37.2262	1.0519e-09	1.85895e-08
SNAP91	chr6	83552880	83709691	-	2.16456	-0.859163	37.1726	1.08122e-09	1.90957e-08
RP11-12A16.3	chr9	125567579	125573023	+	2.01874	-3.67566	37.134	1.10283e-09	1.9454e-08
ADPRH	chr3	119579268	119589945	+	0.709882	3.02913	37.0925	1.12656e-09	1.98584e-08
RASA4	chr7	102573807	102616757	-	0.836824	4.68709	37.0844	1.13127e-09	1.99287e-08
ZNF677	chr19	53235381	53254898	-	1.14871	1.71193	37.0407	1.15687e-09	2.03667e-08
PRRT1	chr6	32148359	32154373	-	0.964727	1.78499	37.0275	1.16477e-09	2.04928e-08
DUSP26	chr8	33591332	33600106	-	1.63304	-0.461527	37.0244	1.16663e-09	2.05125e-08
NUMBL	chr19	40665905	40690972	-	0.660521	4.4418	36.9992	1.18177e-09	2.07656e-08
ARMC9	chr2	231198546	231374837	+	0.653562	3.68929	36.9977	1.18269e-09	2.07685e-08
NPTX1	chr17	80467148	80477843	-	2.46529	2.55057	36.8851	1.25299e-09	2.19821e-08
RP11-864N7.4	chr11	74698231	74699658	-	1.75612	-2.45338	36.8845	1.25338e-09	2.19821e-08
FAM212A	chr3	49803254	49805030	+	0.884694	-0.0739495	36.8732	1.26069e-09	2.20561e-08
ATP6V0CP3	chr6	42727234	42727700	+	1.50515	-3.44902	36.873	1.26078e-09	2.20561e-08
CLEC9A	chr12	10030677	10066027	+	1.36141	-1.89884	36.8455	1.27869e-09	2.23552e-08
GRIK3	chr1	36795527	37034129	-	2.09501	0.732305	36.8324	1.28735e-09	2.24925e-08
GRAPL	chr17	19127469	19159176	+	1.39835	-0.265905	36.8206	1.29516e-09	2.26148e-08
SDC3	chr1	30869467	30908761	-	0.800836	6.62222	36.8103	1.30202e-09	2.27202e-08
CRLF1	chr19	18572220	18607741	-	1.69147	1.82981	36.7989	1.30967e-09	2.28393e-08
CTD-2033D15.3	chr15	39588357	39588882	-	1.36267	-1.32827	36.7098	1.37088e-09	2.38917e-08
AGTR1	chr3	148697784	148743008	+	2.20495	0.982253	36.7078	1.37232e-09	2.39019e-08
SP140	chr2	230203110	230313215	+	1.11337	2.53914	36.7037	1.37518e-09	2.39366e-08
CH17-472G23.1	chr1	120197085	120319680	+	1.73631	-3.22601	36.6911	1.38412e-09	2.40771e-08
TRIM9	chr14	50975262	51096061	-	1.42058	0.508387	36.6858	1.38789e-09	2.41275e-08
TUB	chr11	8019244	8106112	+	1.38193	1.69554	36.6808	1.39144e-09	2.41741e-08
MMP2	chr16	55389700	55506691	+	1.10282	8.30951	36.6552	1.4098e-09	2.44778e-08
RP11-863P13.4	chr16	88088041	88100985	-	1.67004	-1.60691	36.6347	1.42473e-09	2.47215e-08
TSPAN7	chrX	38561370	38688920	+	1.31983	4.09723	36.623	1.43327e-09	2.48541e-08
ULK2	chr17	19770829	19867936	-	0.787115	3.59754	36.616	1.43849e-09	2.49135e-08
SFMBT2	chr10	7158624	7411486	-	0.858486	3.2535	36.6123	1.44121e-09	2.49379e-08
RP11-426C22.5	chr16	29116127	29217860	+	0.904697	-1.12996	36.5812	1.46435e-09	2.53139e-08
LINC00987	chr12	9240003	9243052	+	0.853487	-0.174995	36.5746	1.4693e-09	2.53837e-08
FOXS1	chr20	31844301	31845619	-	1.10491	2.26041	36.5683	1.47413e-09	2.54512e-08
RP11-160E2.19	chr17	19091069	19091825	-	1.3819	-1.39666	36.5537	1.4852e-09	2.56264e-08
MMP23A	chr1	1699942	1701782	+	1.27466	1.02744	36.5327	1.50124e-09	2.58871e-08
CR2	chr1	207454230	207489895	+	2.26339	4.40432	36.5267	1.50589e-09	2.5935e-08
RP11-705C15.3	chr12	9658567	9662085	+	0.876571	0.389689	36.5126	1.51681e-09	2.60907e-08
CCDC36	chr3	49198428	49258104	+	1.04396	-0.978978	36.5021	1.52503e-09	2.61995e-08
MSR1	chr8	16107878	16567490	-	1.02784	4.48516	36.491	1.53376e-09	2.63331e-08
MITF	chr3	69739435	69968337	+	0.88652	3.73504	36.4612	1.55734e-09	2.67215e-08
RP11-333I13.1	chr2	46777783	46780245	+	1.08574	-1.5212	36.446	1.56952e-09	2.68971e-08
FHOD3	chr18	36297714	36780055	+	1.33221	2.23371	36.4157	1.59415e-09	2.73024e-08
ALDH1B1	chr9	38392664	38398661	+	0.995122	6.28314	36.4114	1.59763e-09	2.7345e-08
MAN1C1	chr1	25617468	25786207	+	0.976476	3.98713	36.3559	1.6438e-09	2.81179e-08
KCNAB1	chr3	156037701	156539138	+	0.796478	1.12339	36.351	1.64799e-09	2.81722e-08
MYOC	chr1	171635417	171652683	-	2.9059	1.59093	36.3486	1.64995e-09	2.81884e-08
RP11-441F2.5	chr16	56351886	56353524	-	2.10154	-2.62585	36.3298	1.66598e-09	2.84448e-08
AC106786.1	chr5	123087248	123090299	-	1.2878	-1.98451	36.319	1.67523e-09	2.85851e-08
RP11-617F23.1	chr15	90074512	90082207	-	1.10606	2.99216	36.2901	1.70026e-09	2.8945e-08
GNAL	chr18	11688956	11885685	+	1.11123	3.30627	36.2898	1.7005e-09	2.8945e-08
NHLRC4	chr16	566996	569495	+	0.905587	-1.10634	36.2392	1.74526e-09	2.96658e-08
IPCEF1	chr6	154154496	154356792	-	1.04434	1.64809	36.2392	1.74528e-09	2.96658e-08
pk	chr2	173075435	173268010	+	0.97623	6.64147	36.2383	1.74606e-09	2.96658e-08
CALHM1	chr10	103453387	103458888	-	2.40482	-2.14147	36.2209	1.76168e-09	2.9913e-08
BEND4	chr4	42110938	42152878	-	1.79082	0.0854899	36.1762	1.80263e-09	3.05521e-08
COL6A1	chr21	45981737	46005050	+	0.905401	8.76117	36.1565	1.82089e-09	3.08427e-08
TTLL7	chr1	83865028	83999150	-	1.48558	3.31965	36.155	1.82226e-09	3.08471e-08
RERGL	chr12	18080869	18320107	-	1.92219	-0.0969525	36.1427	1.83384e-09	3.10242e-08
BIN2	chr12	51281038	51324668	-	0.872505	3.24708	36.1403	1.83612e-09	3.10438e-08
FXYD2	chr11	117800844	117828698	-	2.40314	1.57564	36.1362	1.84001e-09	3.10906e-08
FAM69A	chr1	92832737	92961522	-	0.636049	3.76987	36.0896	1.88446e-09	3.18224e-08
SGCB	chr4	52020706	52038482	-	0.606575	5.3425	36.0593	1.91406e-09	3.23026e-08
SLC24A3	chr20	19212646	19722937	+	1.07263	3.6858	36.0361	1.93691e-09	3.26683e-08
CHL1	chr3	196596	409417	+	1.33549	2.68333	36.0298	1.94326e-09	3.27554e-08
PCDHB18P	chr5	141234333	141237529	+	1.0204	-0.717509	36.0251	1.9479e-09	3.28137e-08
RP11-160E2.11	chr17	19160789	19162274	+	1.39681	-1.04756	36.01	1.96304e-09	3.30486e-08
PRRX1	chr1	170662728	170739419	+	1.13984	4.87173	35.9984	1.9748e-09	3.32264e-08
GLP2R	chr17	9822206	9892102	+	1.63861	0.893916	35.9858	1.98765e-09	3.34055e-08
CCR7	chr17	40553769	40565472	-	1.483	2.81437	35.9856	1.98785e-09	3.34055e-08
SPARC	chr5	151661096	151687165	-	0.915264	9.77378	35.9833	1.99014e-09	3.34237e-08
MACF1	chr1	39081316	39487177	+	0.658645	7.78418	35.9749	1.99881e-09	3.3549e-08
MYOM1	chr18	3066807	3220108	-	1.44694	2.63158	35.9361	2.03901e-09	3.4203e-08
LY96	chr8	73991352	74029087	+	0.916802	2.44704	35.9047	2.07207e-09	3.47367e-08
C16orf86	chr16	67666816	67668758	+	0.755033	-0.191408	35.8928	2.08482e-09	3.49082e-08
CFAP58	chr10	104353764	104455090	+	1.20587	-2.24779	35.8901	2.08765e-09	3.49344e-08
LOXL1	chr15	73925989	73952137	+	0.871618	5.18504	35.827	2.15636e-09	3.60624e-08
TMC3	chr15	81331217	81374213	-	1.73262	-2.5531	35.8092	2.17618e-09	3.63721e-08
CLEC14A	chr14	38254103	38256369	-	0.793844	3.99634	35.7911	2.19652e-09	3.66898e-08
CTD-2373N4.3	chr8	30552345	30553766	+	1.13755	0.0514154	35.7758	2.21379e-09	3.6956e-08
THSD1	chr13	52377167	52406494	-	0.752585	1.77085	35.7632	2.2282e-09	3.71743e-08
MMP19	chr12	55835433	55842966	-	0.885322	3.64656	35.7596	2.23229e-09	3.72201e-08
GSN-AS1	chr9	121280768	121285530	-	0.95672	0.503351	35.7346	2.2611e-09	3.76778e-08
P2RX5	chr17	3672199	3696404	-	1.46776	1.97951	35.7228	2.27492e-09	3.78852e-08
RP11-672L10.2	chr18	902766	906667	-	2.07152	-1.98317	35.6938	2.30895e-09	3.84289e-08
PCDHGA5	chr5	141364232	141512979	+	1.09966	0.775843	35.6908	2.31255e-09	3.84657e-08
RGS18	chr1	192158457	192185815	+	0.970738	0.899788	35.6799	2.3255e-09	3.8658e-08
THRSP	chr11	78063861	78068351	+	2.20922	-2.44222	35.6761	2.33002e-09	3.86928e-08
ABCA4	chr1	93992835	94121132	-	1.34728	-1.61081	35.6612	2.34796e-09	3.89379e-08
ARRDC5	chr19	4890437	4902867	-	1.28604	-1.25077	35.6588	2.35089e-09	3.89632e-08
GLIS1	chr1	53506237	53738106	-	1.15648	0.199398	35.6431	2.36987e-09	3.92544e-08
LDOC1	chrX	141175745	141177125	-	1.23775	3.24919	35.6246	2.39249e-09	3.95738e-08
ZNF626	chr19	20544571	20863281	-	1.20957	1.71324	35.6246	2.3925e-09	3.95738e-08
LRRC10B	chr11	61508800	61511018	+	1.63464	0.710536	35.6238	2.39344e-09	3.95738e-08
RARRES2	chr7	150338317	150341674	-	0.951928	5.17792	35.5929	2.43167e-09	4.0182e-08
RP11-545I5.3	chr6	145799409	145886585	+	0.830419	0.959271	35.5827	2.44443e-09	4.03687e-08
EPHA6	chr3	96814581	97752460	+	2.4587	-1.6289	35.5683	2.46267e-09	4.06458e-08
ADAMTS7P4	chr15	85255369	85330334	-	1.16018	-2.17702	35.5492	2.48687e-09	4.09964e-08
GNGT2	chr17	49202791	49210574	-	0.880646	0.27937	35.5434	2.49436e-09	4.10954e-08
CD207	chr2	70830214	70835822	-	1.5531	-0.189796	35.516	2.52969e-09	4.16527e-08
PCDHB7	chr5	141172619	141176383	+	1.09137	0.945073	35.5093	2.53831e-09	4.17699e-08
AC090044.2	chr3	857124	858091	+	1.83092	-3.8184	35.5021	2.54781e-09	4.19014e-08
SIGLEC6	chr19	51519525	51531856	-	1.47866	0.182767	35.4981	2.55305e-09	4.19627e-08
TCF23	chr2	27149004	27156974	+	2.35988	-0.521592	35.4513	2.61501e-09	4.29302e-08
ITGAD	chr16	31393312	31426505	+	1.54646	-1.51832	35.4437	2.62525e-09	4.30728e-08
RP11-758N13.1	chr15	32717270	32719007	-	1.37827	-0.486359	35.4227	2.6538e-09	4.35154e-08
RGL1	chr1	183636085	183928531	+	0.811612	4.151	35.4205	2.65676e-09	4.35381e-08
F8	chrX	154835788	155026940	-	0.926793	2.89688	35.4141	2.6655e-09	4.36556e-08
ADRA1A	chr8	26748150	26867273	-	1.36033	-1.96724	35.3693	2.72757e-09	4.46458e-08
CALY	chr10	133324072	133336935	-	2.05765	-0.893434	35.3451	2.76157e-09	4.51757e-08
ARHGAP9	chr12	57472255	57488814	-	0.956884	3.37397	35.252	2.89684e-09	4.73327e-08
NXPH3	chr17	49575858	49583827	+	1.68161	2.00302	35.2501	2.89973e-09	4.73519e-08
SV2C	chr5	76083172	76353939	+	1.75375	-0.567984	35.2394	2.91566e-09	4.75842e-08
F2R	chr5	76716043	76735781	+	0.736066	6.25599	35.2302	2.92949e-09	4.77817e-08
FAM229B	chr6	112087599	112102790	+	1.0051	1.5	35.2155	2.95159e-09	4.81138e-08
RP11-629G13.1	chr11	112959279	112963460	-	2.05948	-3.55215	35.2048	2.96794e-09	4.83519e-08
AIF1	chr6	31615184	31617021	+	0.90054	3.96393	35.2017	2.97262e-09	4.83997e-08
GFRA1	chr10	116056925	116273467	-	1.79598	3.75861	35.1893	2.99161e-09	4.86803e-08
EMCN	chr4	100395341	100880126	-	0.877349	3.42181	35.187	2.9951e-09	4.87087e-08
CXCL13	chr4	77511753	77611834	+	1.63056	4.71641	35.1689	3.02306e-09	4.90585e-08
LINC00402	chr13	74231457	74259976	+	1.93228	-2.05492	35.1674	3.02543e-09	4.90585e-08
TMEM252	chr9	68536580	68540867	-	2.12561	-0.505865	35.1652	3.02892e-09	4.90858e-08
IGIP	chr5	140125935	140129392	+	0.607798	3.18664	35.1557	3.04362e-09	4.92953e-08
PAK3	chrX	110944285	111227361	+	1.4831	1.28862	35.1417	3.06572e-09	4.96243e-08
RBMS3-AS2	chr3	29526251	29642809	-	1.71081	-3.64694	35.1372	3.07276e-09	4.97091e-08
SGCE	chr7	94585230	94656209	-	1.07633	3.76212	35.1265	3.08962e-09	4.99527e-08
ARHGAP24	chr4	85475114	86002670	+	0.852107	3.57654	35.1038	3.12583e-09	5.05087e-08
C20orf194	chr20	3249305	3407625	-	0.941903	4.04889	35.0774	3.16861e-09	5.11701e-08
ZNF835	chr19	56661981	56671783	-	1.3436	-0.134442	35.0754	3.17187e-09	5.1193e-08
RP11-374F3.5	chr13	30344672	30347167	+	1.30409	-2.19956	35.0081	3.2833e-09	5.28261e-08
CDKL3	chr5	134286350	134371047	-	0.71878	-0.977128	35.0025	3.29284e-09	5.29297e-08
LINC01480	chr19	41535183	41536904	+	1.23284	-0.745426	35.0008	3.29561e-09	5.29437e-08
PNOC	chr8	28316986	28343355	+	1.48115	-0.0642587	34.9692	3.34966e-09	5.37377e-08
PRKACB	chr1	84078062	84238498	+	0.867891	5.19229	34.9685	3.35085e-09	5.37377e-08
ADGRB3	chr6	68635367	69389511	+	1.8678	-0.375795	34.9658	3.35548e-09	5.37518e-08
VIM-AS1	chr10	17214239	17229985	-	1.05781	-0.28655	34.9649	3.357e-09	5.37518e-08
IGSF10	chr3	151425384	151458709	-	1.51778	1.69394	34.9646	3.35755e-09	5.37518e-08
RP11-190C22.1	chr3	119635526	119636150	-	1.96441	-3.84234	34.9474	3.38739e-09	5.4167e-08
RASGRP4	chr19	38409051	38426305	-	0.895977	1.17784	34.9361	3.40706e-09	5.44501e-08
GABARAPL1	chr12	10212458	10223130	+	0.758276	4.70391	34.9298	3.4181e-09	5.45951e-08
THBS3	chr1	155195588	155209051	-	0.672739	4.10264	34.9222	3.43143e-09	5.47765e-08
BDKRB1	chr14	96255824	96268967	+	1.06278	1.07129	34.9076	3.45735e-09	5.51585e-08
TOX2	chr20	43914864	44069616	+	0.881345	2.39188	34.8907	3.48739e-09	5.55737e-08
COLQ	chr3	15450133	15521751	-	0.881598	0.374994	34.8792	3.50801e-09	5.58703e-08
MAB21L1	chr13	35474182	35477209	-	1.59347	-1.90886	34.8511	3.559e-09	5.66499e-08
OR8T1P	chr12	48442030	48442947	-	1.46134	-3.64142	34.8481	3.56461e-09	5.67065e-08
LINC00473	chr6	165908802	165988048	-	2.02672	-0.0715526	34.8463	3.56796e-09	5.67272e-08
PTPRQ	chr12	80402178	80680234	+	2.16257	-2.20527	34.8286	3.60036e-09	5.72097e-08
IZUMO4	chr19	2096429	2099593	+	1.24382	0.23513	34.8238	3.60931e-09	5.7319e-08
RP11-1036E20.9	chr11	59268876	59284033	-	2.58186	-3.6115	34.7946	3.66386e-09	5.8152e-08
CCND2-AS1	chr12	4248765	4276184	-	1.31283	-2.75038	34.7648	3.72045e-09	5.90164e-08
AC006129.1	chr19	41531206	41532174	+	1.26909	-3.45036	34.7527	3.74366e-09	5.93506e-08
GAL3ST4	chr7	100159244	100168750	-	0.867122	3.31712	34.6831	3.87995e-09	6.1441e-08
MLNR	chr13	49220338	49222377	+	2.80294	-1.64658	34.6815	3.88297e-09	6.14538e-08
PAX5	chr9	36833275	37034185	-	1.90363	3.57427	34.6752	3.89563e-09	6.16189e-08
SLC16A7	chr12	59596067	59789855	+	1.14877	3.5415	34.665	3.91602e-09	6.19061e-08
PRTG	chr15	55611546	55743090	-	1.26902	1.37929	34.6435	3.9596e-09	6.25238e-08
SLC25A4	chr4	185143241	185150382	+	0.869141	4.61209	34.6097	4.02887e-09	6.35815e-08
MLLT11	chr1	151057758	151068497	+	1.03608	3.0471	34.5625	4.12784e-09	6.50692e-08
CTD-2135D7.5	chr16	14009280	14016016	-	1.27389	-3.22085	34.5373	4.18159e-09	6.58206e-08
TMEM71	chr8	132685007	132760712	-	0.99911	0.828942	34.5368	4.18263e-09	6.58206e-08
GLI2	chr2	120735623	120992653	+	1.03678	3.59993	34.4772	4.31265e-09	6.78282e-08
PIEZO2	chr18	10666483	11148762	-	0.99131	2.93207	34.4138	4.45558e-09	6.99968e-08
HEYL	chr1	39624153	39639945	-	1.01183	4.85128	34.3829	4.52672e-09	7.10742e-08
NPAS3	chr14	32934933	33804176	+	1.34928	0.193355	34.3618	4.57621e-09	7.18104e-08
FZD4	chr11	86945679	86955391	-	0.70782	4.79156	34.3598	4.58098e-09	7.18447e-08
SLC8A2	chr19	47428017	47472168	-	2.13834	1.19557	34.3577	4.58585e-09	7.18804e-08
CCL11	chr17	34285668	34288334	+	1.37819	3.43295	34.3372	4.63446e-09	7.26014e-08
ZNF843	chr16	31432593	31443160	-	0.959227	-0.468453	34.3204	4.67459e-09	7.31473e-08
ITK	chr5	157142933	157255191	+	1.15561	2.92794	34.3174	4.68179e-09	7.32186e-08
HOXB-AS1	chr17	48543551	48551250	+	0.948063	-0.574519	34.3081	4.70414e-09	7.35266e-08
RAC2	chr22	37225261	37244448	-	0.909606	5.75589	34.2918	4.74383e-09	7.41053e-08
RP11-752L20.3	chr4	147487971	147496062	+	0.83382	0.647102	34.2705	4.79608e-09	7.48794e-08
GATA3	chr10	8053604	8075198	+	1.01068	2.23461	34.2229	4.91481e-09	7.66302e-08
DSTN	chr20	17569863	17609919	+	0.710323	8.45912	34.2222	4.91651e-09	7.66302e-08
ANKRD35	chr1	145866560	145885866	-	1.17213	1.0553	34.2062	4.95711e-09	7.72196e-08
RGS8	chr1	182641816	182684576	-	1.8721	-2.82807	34.2034	4.96415e-09	7.72858e-08
P2RX7	chr12	121132819	121188032	+	0.888007	2.59663	34.1953	4.98494e-09	7.75403e-08
ZSCAN16-AS1	chr6	28121795	28137293	-	0.712494	1.47292	34.1948	4.98609e-09	7.75403e-08
PRR34	chr22	46049478	46054144	-	0.738735	-1.32921	34.1757	5.03537e-09	7.81313e-08
GREB1	chr2	11482341	11642788	+	1.18192	2.22612	34.1742	5.03924e-09	7.81476e-08
RP11-35G9.5	chr18	57639455	57738044	+	0.691148	0.105123	34.1597	5.07696e-09	7.86886e-08
SIPA1	chr11	65585395	65650930	+	0.60567	5.57573	34.1184	5.18583e-09	8.01967e-08
CTC-203F4.2	chr5	135399280	135401296	+	0.885566	-1.43642	34.1084	5.21251e-09	8.05195e-08
PCAT19	chr19	41454169	41500649	-	0.746977	1.46697	34.1016	5.23087e-09	8.07132e-08
RP11-212I21.3	chr16	55486618	55488777	+	1.46129	-2.88558	34.0794	5.29077e-09	8.1592e-08
TSPAN4	chr11	842808	867116	+	0.728461	4.34894	34.0494	5.37292e-09	8.28128e-08
CBLN3	chr14	24426532	24430954	-	0.689186	1.04523	34.0089	5.48596e-09	8.44612e-08
GALNT16	chr14	69259277	69357033	+	1.49102	2.03039	33.9904	5.5385e-09	8.51755e-08
ALOX5AP	chr13	30713478	30764426	+	1.00443	4.31291	33.9742	5.58489e-09	8.57462e-08
GPR155	chr2	174431571	174487094	-	1.13128	4.11829	33.9726	5.58927e-09	8.57661e-08
TARID	chr6	133502252	133892802	-	1.19598	-0.283053	33.9545	5.64154e-09	8.65202e-08
CFP	chrX	47624213	47630305	-	1.06369	1.06534	33.9066	5.78233e-09	8.86304e-08
RP11-620J15.3	chr12	57931528	57936175	-	0.958203	0.0274226	33.9041	5.78961e-09	8.86929e-08
ADAM23	chr2	206443539	206621130	+	1.21016	1.82291	33.8827	5.85379e-09	8.95772e-08
SESN3	chr11	95165540	95232541	-	1.05335	5.11321	33.8801	5.86159e-09	8.96472e-08
AC145110.1	chr8	29748309	29798492	+	1.35191	-1.89328	33.8774	5.8697e-09	8.97217e-08
PCA3	chr9	76764436	76787569	+	2.26565	-1.80795	33.8603	5.92152e-09	9.04639e-08
ATCAY	chr19	3879864	3928079	+	1.92269	-2.25137	33.8525	5.94519e-09	9.07755e-08
DOCK11	chrX	118495898	118686163	+	0.881313	4.54999	33.8085	6.08126e-09	9.28019e-08
GRIN2A	chr16	9753404	10182754	-	1.82734	2.03002	33.7637	6.22292e-09	9.49116e-08
SLAMF6	chr1	160485030	160523262	-	1.13522	2.86174	33.7478	6.27385e-09	9.56294e-08
ZBTB20	chr3	114338094	115147271	-	0.902595	3.26893	33.7001	6.42965e-09	9.78823e-08
ALDH1A3	chr15	100877714	100916626	+	1.04054	4.82879	33.6594	6.56553e-09	9.98623e-08
LTA	chr6	31572054	31574324	+	1.15935	0.0345144	33.6397	6.63265e-09	1.00773e-07
CCKAR	chr4	26481400	26490462	-	2.90007	-0.811856	33.5835	6.82703e-09	1.0353e-07
LRRC4	chr7	128027071	128032107	-	0.973389	0.996168	33.5625	6.90089e-09	1.04562e-07
MSC	chr8	71841549	71844468	-	0.894702	3.30382	33.549	6.94902e-09	1.05176e-07
RP11-51F16.1	chr17	63700847	63702670	+	1.00178	0.265351	33.5444	6.96563e-09	1.0537e-07
ANTXR1	chr2	69013178	69249327	+	0.945835	7.19862	33.532	7.01027e-09	1.0593e-07
KCNK2	chr1	215005775	215237093	+	1.8647	0.191129	33.5188	7.05786e-09	1.06591e-07
MAGEE1	chrX	76427724	76431353	+	1.15157	0.998148	33.4961	7.14057e-09	1.07781e-07
KCTD8	chr4	44173909	44448807	-	2.57458	-1.8601	33.4899	7.16361e-09	1.0807e-07
RP11-13P5.1	chr6	159107791	159116053	+	2.21581	-4.10144	33.4885	7.16865e-09	1.08087e-07
RP11-35G9.3	chr18	57630302	57669296	+	0.667288	1.22752	33.4873	7.17299e-09	1.08094e-07
GPIHBP1	chr8	143213193	143217170	+	1.3534	-0.161049	33.4731	7.22557e-09	1.08709e-07
DENND2A	chr7	140518420	140673993	-	0.8002	2.4848	33.3973	7.51289e-09	1.12909e-07
SOBP	chr6	107489958	107660167	+	1.15625	3.43338	33.3657	7.63602e-09	1.14697e-07
CMTM3	chr16	66603874	66613892	+	0.80277	4.52867	33.3638	7.64326e-09	1.14744e-07
RGS7BP	chr5	64506257	64612312	+	1.17279	1.03229	33.3515	7.69184e-09	1.15348e-07
Z84812.4	chr16	17514	35195	-	1.42278	-3.24244	33.3263	7.79218e-09	1.16727e-07
FAM110B	chr8	57994509	58204279	+	1.14761	2.15838	33.3171	7.82904e-09	1.17216e-07
ADPGK-AS1	chr15	72782835	72798199	+	0.75939	-1.36978	33.3155	7.83537e-09	1.17247e-07
NNAT	chr20	37521215	37523693	+	1.32213	2.00225	33.2656	8.03914e-09	1.20167e-07
CH17-385C13.2	chr1	146321842	146328211	-	1.54259	-3.78315	33.2588	8.06751e-09	1.20526e-07
SERPINB9P1	chr6	2854657	2881407	-	1.21047	0.533113	33.2042	8.29724e-09	1.23891e-07
RP11-304C12.5	chr11	6323554	6324023	+	2.24816	-4.37082	33.177	8.41407e-09	1.25568e-07
PYHIN1	chr1	158930796	158977054	+	1.11737	1.3549	33.1614	8.48184e-09	1.26511e-07
SGIP1	chr1	66533383	66748299	+	0.819373	2.35283	33.1448	8.55446e-09	1.27457e-07
PTGS1	chr9	122370530	122395703	+	0.92638	4.64044	33.1401	8.57505e-09	1.27696e-07
RGS22	chr8	99960936	100131268	-	1.46944	-1.79715	33.1288	8.62502e-09	1.28371e-07
RP11-848P1.3	chr17	30964935	30965500	-	0.910025	-2.60115	33.1194	8.66701e-09	1.28926e-07
LINC00883	chr3	107240692	107326964	+	0.838967	0.902902	33.0962	8.77122e-09	1.30407e-07
ZKSCAN7	chr3	44555193	44594173	+	0.987947	0.615147	33.0695	8.89246e-09	1.32138e-07
RP11-673E1.3	chr4	143911514	143912053	-	1.21455	-2.86484	33.053	8.96783e-09	1.33187e-07
CHL1-AS2	chr3	195758	197341	-	1.85589	-3.5959	33.0209	9.11724e-09	1.35261e-07
AC109826.1	chr2	98761938	98772920	-	0.905659	-1.64037	32.9951	9.23923e-09	1.36924e-07
NOTCH2	chr1	119911553	120069626	-	0.597023	6.9916	32.9625	9.39539e-09	1.3909e-07
LINC00882	chr3	106836811	107240641	-	1.20636	-2.21498	32.9312	9.54787e-09	1.41272e-07
TMC8	chr17	78130770	78142968	+	0.904609	4.20495	32.925	9.57829e-09	1.41646e-07
ANKRD55	chr5	56099678	56233359	-	1.27081	-2.08645	32.9203	9.60164e-09	1.41916e-07
TRO	chrX	54920462	54931431	+	0.979729	1.6052	32.9055	9.67479e-09	1.42921e-07
PTGDR	chr14	52267713	52276724	+	1.15888	-0.678377	32.883	9.78758e-09	1.4451e-07
PDGFC	chr4	156760454	156971394	-	0.767366	3.81083	32.8763	9.82145e-09	1.44933e-07
PRAMENP	chr22	21991099	22043934	-	2.07803	-2.92385	32.8538	9.93584e-09	1.46465e-07
PTCHD1	chrX	23334015	23404372	+	2.14846	1.60406	32.8517	9.94642e-09	1.46543e-07
TRAC	chr14	22281105	22552155	+	1.0105	4.95516	32.8505	9.95279e-09	1.46559e-07
PCDHB4	chr5	141121799	141125623	+	1.0247	1.64861	32.8425	9.99369e-09	1.47049e-07
CNGA3	chr2	98346155	98398601	+	1.76806	-1.12386	32.7853	1.0292e-08	1.51233e-07
RP11-284N8.3	chr1	110653560	110657040	-	1.23971	1.704	32.755	1.04536e-08	1.53525e-07
EBF3	chr10	129835283	129963841	-	1.0809	1.32653	32.7525	1.04671e-08	1.53643e-07
CTD-2012K14.8	chr16	67517862	67528675	-	1.04456	-2.42166	32.7472	1.04957e-08	1.539e-07
IL17B	chr5	149371324	149404202	-	1.20192	-2.18755	32.7319	1.05788e-08	1.54873e-07
HSPB3	chr5	54455601	54456384	+	2.76952	-2.63249	32.7258	1.06119e-08	1.55276e-07
LINC00921	chr16	3263743	3267567	+	0.763962	-0.0278506	32.7134	1.06796e-08	1.56184e-07
LINC01150	chr11	1902647	1907915	+	1.19242	-3.57732	32.7064	1.07185e-08	1.56669e-07
RP11-117D22.2	chr1	53366668	53368245	-	1.62501	-3.31061	32.6788	1.08715e-08	1.58822e-07
TMCC2	chr1	205228176	205273343	+	0.869139	0.904609	32.6634	1.09582e-08	1.5992e-07
GAS6-AS2	chr13	113864168	113866833	+	1.0946	-0.326636	32.6476	1.10477e-08	1.61142e-07
RP11-360F5.3	chr4	39133913	39135608	+	1.13563	-2.52134	32.6386	1.1099e-08	1.61804e-07
MIR133A1HG	chr18	21825487	21831410	-	1.26809	-1.54337	32.6123	1.12502e-08	1.63837e-07
C5AR1	chr19	47290023	47322066	+	0.957322	4.19768	32.6073	1.1279e-08	1.6417e-07
MCF2	chrX	139581770	139708227	-	1.219	-3.14654	32.5931	1.13615e-08	1.65284e-07
LOX	chr5	122063195	122078285	-	0.960551	5.29361	32.591	1.13738e-08	1.65303e-07
GJA4	chr1	34792998	34795747	+	0.781321	3.31287	32.5909	1.13747e-08	1.65303e-07
PCBP3	chr21	45643694	45942454	+	1.2855	1.39007	32.5567	1.15768e-08	1.68152e-07
TMTC1	chr12	29500840	29784759	-	1.22255	4.54291	32.5508	1.16118e-08	1.68572e-07
KLF8	chrX	56232421	56287889	+	1.02947	1.89813	32.5173	1.18138e-08	1.71414e-07
S1PR4	chr19	3172346	3180332	+	1.07993	1.7191	32.4961	1.1943e-08	1.73108e-07
PIK3IP1	chr22	31281593	31292534	-	0.687545	4.70761	32.4945	1.1953e-08	1.73162e-07
TCEAL6	chrX	102140476	102142970	-	2.82438	-3.53334	32.4836	1.20203e-08	1.74047e-07
SKIDA1	chr10	21513478	21526368	-	1.10222	-0.729172	32.4798	1.20436e-08	1.74293e-07
TREML1	chr6	41149342	41154337	-	1.07277	-1.76262	32.4607	1.21629e-08	1.75744e-07
C15orf52	chr15	40331452	40340967	-	1.17721	3.91847	32.4567	1.21877e-08	1.7601e-07
TGFBR3	chr1	91680343	91906335	-	1.02337	5.04935	32.4073	1.25017e-08	1.80358e-07
CRIM1	chr2	36355926	36551135	+	0.616824	6.38312	32.3966	1.25706e-08	1.81257e-07
ARL10	chr5	176365468	176401865	+	0.81808	2.64969	32.3156	1.31058e-08	1.88289e-07
ZNF354C	chr5	179060415	179083537	+	1.00325	1.33699	32.2991	1.32172e-08	1.89792e-07
GADD45B	chr19	2476122	2478259	+	0.780117	4.67205	32.2883	1.32909e-08	1.90751e-07
AGTR2	chrX	116170722	116174972	+	3.86406	-2.22923	32.2615	1.3476e-08	1.93168e-07
OLFML2B	chr1	161983192	162023854	-	1.03216	5.41728	32.2608	1.34802e-08	1.93168e-07
FBXO30	chr6	145793502	145814753	-	0.601773	4.40234	32.2459	1.35842e-08	1.94457e-07
RP11-564A8.4	chr1	206907619	206908229	+	1.53278	-3.32854	32.241	1.3619e-08	1.94854e-07
DKK3	chr11	11963106	12009769	-	0.79404	6.11714	32.1639	1.41698e-08	2.02422e-07
PTGIR	chr19	46620468	46625118	-	0.8297	1.78298	32.1459	1.43021e-08	2.04206e-07
CD300C	chr17	74541108	74546143	-	0.978366	0.320764	32.1431	1.43224e-08	2.04391e-07
RP11-798K23.5	chr5	179527224	179527513	-	1.02468	-3.01175	32.1163	1.45215e-08	2.0702e-07
SNX20	chr16	50666300	50681353	-	0.935455	2.80355	32.1131	1.45451e-08	2.07249e-07
CXCR4	chr2	136114349	136118165	-	0.933341	6.02718	32.1058	1.46002e-08	2.07927e-07
CERKL	chr2	181536676	181680665	-	0.662539	2.9455	32.0996	1.46464e-08	2.08478e-07
XKR4	chr8	55102389	55542054	+	1.7742	-0.173569	32.0804	1.47921e-08	2.10444e-07
RP11-542M13.3	chr16	85935281	85936223	-	1.71737	-3.63388	32.042	1.50871e-08	2.14531e-07
ZMAT1	chrX	101882288	101932031	-	1.18143	1.74858	32.0349	1.51424e-08	2.15207e-07
ARHGEF15	chr17	8310241	8322516	+	0.767593	3.28062	32.0258	1.52138e-08	2.16111e-07
RAMP2	chr17	42758447	42763041	+	0.822097	4.52717	31.9769	1.56017e-08	2.21508e-07
PNMAL2	chr19	46486906	46496498	-	1.05159	0.905488	31.9543	1.57843e-08	2.23985e-07
KLF12	chr13	73686089	74133905	-	0.997502	4.01275	31.9344	1.59466e-08	2.25942e-07
RP11-20J15.3	chr10	44282926	44293709	-	1.74528	-3.70694	31.9293	1.59883e-08	2.26301e-07
PCDHGC3	chr5	141475947	141512979	+	0.921775	5.31757	31.907	1.6173e-08	2.28799e-07
SPN	chr16	29662979	29670876	+	0.986951	3.85171	31.9051	1.61894e-08	2.288e-07
CADM2	chr3	84958981	86074429	+	1.98921	-0.16068	31.9004	1.62284e-08	2.29232e-07
CCL2	chr17	34255218	34257203	+	0.968202	4.78549	31.8988	1.62416e-08	2.29301e-07
NFIC	chr19	3359563	3469217	+	0.665568	7.57009	31.8895	1.63194e-08	2.30156e-07
WNT9B	chr17	46833201	46886730	+	1.39584	-2.61374	31.8884	1.63292e-08	2.30156e-07
ZNF831	chr20	59191020	59259113	+	1.28669	1.58904	31.8876	1.63354e-08	2.30156e-07
COL25A1	chr4	108810721	109302657	-	1.49504	-1.94561	31.8661	1.65174e-08	2.32485e-07
LINC00643	chr14	62114353	62130962	+	1.75737	-3.38241	31.8277	1.68471e-08	2.37005e-07
CPQ	chr8	96645227	97149654	+	0.746808	4.39077	31.8212	1.6904e-08	2.37554e-07
LRP1B	chr2	140231423	142131701	-	1.79704	-1.7079	31.8206	1.69088e-08	2.37554e-07
ENG	chr9	127815012	127854756	-	0.669302	7.06941	31.8175	1.69363e-08	2.37777e-07
CTB-47B11.3	chr5	157375741	157384950	-	1.20897	-2.01366	31.7933	1.71481e-08	2.40628e-07
RP11-523O18.5	chr10	48976554	48993046	-	1.52064	-3.5895	31.784	1.72308e-08	2.41667e-07
RP11-327F22.2	chr16	50735713	50740716	-	0.994206	-1.5459	31.7734	1.73246e-08	2.42738e-07
DOCK8	chr9	214854	465259	+	0.857107	5.00746	31.7389	1.76354e-08	2.46843e-07
AHNAK2	chr14	104937244	104978357	-	1.4514	6.98071	31.7216	1.77937e-08	2.48837e-07
RP11-229O3.1	chr16	64981123	64983227	-	1.32692	-2.60039	31.7213	1.77959e-08	2.48837e-07
IKZF3	chr17	39757715	39864188	-	1.23062	5.24966	31.6711	1.82623e-08	2.55102e-07
AMICA1	chr11	118193740	118225094	-	0.902808	3.07521	31.6546	1.84179e-08	2.57095e-07
ANKRD53	chr2	70978380	70985499	+	1.04603	-0.690338	31.654	1.84235e-08	2.57095e-07
ANTXR2	chr4	79901149	80125454	-	0.903585	6.10263	31.5997	1.89461e-08	2.64121e-07
CSRP2	chr12	76858715	76879060	-	0.883105	3.10139	31.5927	1.90142e-08	2.64938e-07
TVP23A	chr16	10760919	10818794	-	0.708054	0.0565141	31.5589	1.93478e-08	2.6918e-07
RRN3P2	chr16	29074976	29116718	+	0.703064	0.433721	31.5578	1.93587e-08	2.69196e-07
CD84	chr1	160541095	160579516	-	0.962066	4.28114	31.5316	1.96222e-08	2.72724e-07
PRCD	chr17	76527586	76553578	+	0.937841	-1.09862	31.5167	1.97728e-08	2.74679e-07
RP5-1039K5.17	chr22	37950965	37951778	+	1.79272	-3.01849	31.4753	2.01991e-08	2.8018e-07
ENPP2	chr8	119557086	119673453	-	0.952672	4.83341	31.4716	2.02382e-08	2.80582e-07
CCDC89	chr11	85684866	85686277	-	0.927471	-1.44022	31.4086	2.09054e-08	2.89254e-07
EPB41L3	chr18	5392381	5630700	-	0.91704	4.02255	31.318	2.1904e-08	3.02618e-07
PCDHGA9	chr5	141402932	141512979	+	0.848502	1.74354	31.3167	2.19186e-08	3.02668e-07
UBXN10-AS1	chr1	20184242	20186486	-	1.61032	-1.4641	31.2931	2.21866e-08	3.06065e-07
PPP1R1A	chr12	54575387	54588659	-	1.99547	1.5452	31.2646	2.2515e-08	3.10286e-07
PLXNC1	chr12	94148723	94307675	+	0.837125	4.61016	31.2572	2.26006e-08	3.11312e-07
LGI1	chr10	93757809	93798174	+	2.06419	-1.6304	31.2502	2.26819e-08	3.12276e-07
TIMP1	chrX	47582313	47586789	+	0.860041	8.99077	31.2391	2.28126e-08	3.13919e-07
TRAV27	chr14	22147995	22148633	+	1.34838	-2.8728	31.2134	2.31171e-08	3.17636e-07
GPX8	chr5	55160118	55167071	+	0.836895	4.19501	31.2094	2.31638e-08	3.18101e-07
AC007952.5	chr17	19092974	19096837	+	1.2612	0.614047	31.2086	2.31738e-08	3.18101e-07
STARD13	chr13	33103135	33350630	-	0.725782	4.55756	31.183	2.34813e-08	3.22003e-07
AVPR1A	chr12	63142759	63150942	-	1.00362	2.23608	31.1787	2.35332e-08	3.22555e-07
MYBL1	chr8	66562175	66614247	-	0.942671	2.25009	31.136	2.40569e-08	3.29245e-07
TRAF1	chr9	120902393	120929173	-	0.7418	3.86036	31.1292	2.41411e-08	3.30235e-07
RORA	chr15	60488284	61229319	-	0.768193	3.75027	31.1261	2.41803e-08	3.30607e-07
LINC01013	chr6	132131915	132169374	+	1.17935	-2.36727	31.1115	2.43621e-08	3.32601e-07
CCL21	chr9	34709005	34710124	-	1.62499	4.90279	31.1032	2.44663e-08	3.3386e-07
KHDRBS2	chr6	61679960	62286227	-	1.88911	-2.86823	31.1	2.45074e-08	3.34092e-07
SLC30A8	chr8	116950273	117176714	+	2.72222	-1.10528	31.076	2.4812e-08	3.37746e-07
RP11-359E3.4	chr10	86749754	86756298	-	0.867032	0.628876	31.062	2.49921e-08	3.40029e-07
C9orf47	chr9	88990863	88996140	+	1.2464	-1.27914	31.0537	2.5099e-08	3.41318e-07
HMCN2	chr9	130265882	130434123	+	1.37153	3.72587	31.048	2.51724e-08	3.42148e-07
GLRA3	chr4	174636914	174829314	-	1.7531	-2.88377	31.0346	2.53468e-08	3.4435e-07
LRRN2	chr1	204617170	204685733	-	1.22538	2.25938	31.0204	2.55331e-08	3.4671e-07
PDE4D	chr5	58969038	60522120	-	0.804818	4.74574	30.9808	2.60598e-08	3.53516e-07
HDGFRP3	chr15	83112738	83208018	-	0.959812	4.21701	30.975	2.61371e-08	3.54353e-07
ADAMTS8	chr11	130404925	130428993	-	1.69001	2.59734	30.9742	2.61486e-08	3.54353e-07
GPR17	chr2	127645864	127652639	+	1.41171	-0.774354	30.9733	2.61598e-08	3.54353e-07
AC013474.4	chr2	126679622	126680420	+	1.43716	-3.46343	30.9374	2.66491e-08	3.60452e-07
BCL6	chr3	187721377	187745727	-	0.660945	5.25605	30.9316	2.67289e-08	3.61356e-07
COL23A1	chr5	178237618	178590555	-	1.08104	0.860706	30.9245	2.68261e-08	3.62145e-07
REEP1	chr2	86213993	86338083	-	1.42137	2.76722	30.9063	2.70793e-08	3.65202e-07
KAT2B	chr3	20040023	20154404	+	0.665402	4.39519	30.9	2.71679e-08	3.66218e-07
ATP8A2	chr13	25372071	26025851	+	1.15267	0.212066	30.8949	2.72381e-08	3.66987e-07
RP11-182J1.1	chr15	84631898	84633987	-	1.0727	-1.6944	30.8732	2.75455e-08	3.70948e-07
RP11-384F7.2	chr3	117672154	117997592	-	2.42538	-4.20639	30.8424	2.79853e-08	3.76505e-07
PTPRD-AS1	chr9	8858130	8862255	+	1.55453	-2.6713	30.8076	2.84918e-08	3.83133e-07
RP11-309L24.6	chr7	128912732	128914063	-	2.49036	-2.32107	30.7909	2.87386e-08	3.86265e-07
RP1-142L7.5	chr6	112154765	112166476	+	1.27188	-3.48433	30.7888	2.87697e-08	3.86495e-07
PCDH11Y	chrY	5000226	5742224	+	2.48962	-3.0482	30.7828	2.88583e-08	3.8731e-07
CTC-429P9.5	chr19	16639967	16640668	-	0.762888	-1.10598	30.7815	2.88776e-08	3.87382e-07
MMP16	chr8	88032009	88328025	-	1.03315	1.95202	30.7565	2.92525e-08	3.92222e-07
RP3-333A15.2	chr1	71005854	71006502	-	1.58326	-3.94942	30.7263	2.97112e-08	3.98124e-07
CCR2	chr3	46353734	46360928	+	1.16709	1.19094	30.7256	2.97215e-08	3.98124e-07
MEF2BNB-MEF2B	chr19	19145567	19192158	-	0.731109	2.20918	30.7215	2.97846e-08	3.98777e-07
CD40LG	chrX	136648193	136660390	+	1.12361	0.66881	30.6855	3.03417e-08	4.06039e-07
AC004791.2	chr19	15851993	15864904	-	2.04565	-3.89866	30.6622	3.07084e-08	4.10749e-07
GPR26	chr10	123666355	123694607	+	2.25621	-3.19458	30.6404	3.10567e-08	4.14808e-07
RP11-326G21.1	chr1	149264252	149264816	+	0.977323	-1.91544	30.6333	3.11699e-08	4.16119e-07
RP11-672A2.4	chr11	76654169	76656712	-	1.04442	-1.95507	30.5908	3.18594e-08	4.24915e-07
ASXL3	chr18	33578615	33751192	+	1.32556	0.0780935	30.5787	3.20592e-08	4.27374e-07
RP11-148O21.2	chr8	11558466	11560020	-	2.16573	-3.44734	30.559	3.23872e-08	4.31331e-07
CDK15	chr2	201790461	201895550	+	1.05268	-1.22945	30.5573	3.24156e-08	4.31502e-07
UBE2QL1	chr5	6448623	6494909	+	1.26276	0.486846	30.5425	3.26633e-08	4.34591e-07
PRR33	chr11	1889145	1890854	-	1.12354	-1.25686	30.5373	3.2751e-08	4.35549e-07
CTD-2509G16.5	chr14	65236480	65318790	-	1.58192	-3.71885	30.5005	3.3378e-08	4.43249e-07
DPY19L2	chr12	63558913	63668939	-	1.26855	0.343891	30.4631	3.40277e-08	4.51446e-07
C3orf70	chr3	185078050	185153014	-	1.31976	3.80414	30.4532	3.42026e-08	4.53549e-07
ASMT	chrX	1615001	1643081	+	1.43504	-3.24265	30.4494	3.42683e-08	4.54202e-07
LINC01550	chr14	97925610	97978124	-	1.15805	-0.218269	30.4136	3.49071e-08	4.62228e-07
NREP	chr5	111662621	111997464	-	0.744794	5.38876	30.4108	3.49571e-08	4.62669e-07
KY	chr3	134603138	134651636	-	1.61189	-0.839436	30.3984	3.51825e-08	4.65207e-07
PAPLN	chr14	73237497	73274640	+	1.00771	4.09411	30.3783	3.55487e-08	4.69602e-07
SLITRK4	chrX	143622790	143635777	-	1.37997	-0.431951	30.3651	3.57902e-08	4.72343e-07
COL5A1	chr9	134641774	134844843	+	0.93044	8.49093	30.3487	3.60946e-08	4.76132e-07
LINC00877	chr3	72035300	72279503	-	1.11792	-1.95169	30.3433	3.61948e-08	4.77227e-07
PDGFRA	chr4	54229097	54298247	+	0.886994	6.07097	30.3339	3.63713e-08	4.79327e-07
ARHGEF17	chr11	73308289	73369091	+	0.755709	5.7045	30.2663	3.76608e-08	4.9585e-07
LINC00840	chr10	43859411	43895433	+	1.17549	-2.76704	30.2606	3.77713e-08	4.97069e-07
MUSK	chr9	110668771	110801579	+	1.81257	0.0423712	30.248	3.80185e-08	5.00009e-07
SERPINA6	chr14	94304248	94323394	-	3.26829	0.862044	30.2474	3.80309e-08	5.00009e-07
MOXD1	chr6	132296055	132401545	-	1.16899	3.96141	30.2372	3.82313e-08	5.02223e-07
NLGN1	chr3	173396284	174286644	+	1.69198	0.584684	30.2363	3.82475e-08	5.02223e-07
DOCK3	chr3	50675241	51384198	+	1.3207	1.17856	30.2271	3.84306e-08	5.04309e-07
CGNL1	chr15	57375967	57550727	+	1.19844	3.63842	30.2073	3.88253e-08	5.09247e-07
CFHR1	chr1	196819757	196832189	+	2.23554	-3.26885	30.2041	3.8888e-08	5.09828e-07
RP11-632L2.2	chr13	93226612	93227317	-	1.27899	-2.00468	30.198	3.90104e-08	5.1098e-07
HYDIN2	chr1	146547367	146914294	+	1.39465	-0.773601	30.1979	3.90127e-08	5.1098e-07
MID2	chrX	107825755	107927193	+	0.942788	2.62827	30.1636	3.97094e-08	5.19369e-07
AC106801.1	chr5	157565964	157569098	+	1.22673	-2.5282	30.125	4.05081e-08	5.29566e-07
COL1A2	chr7	94394561	94431232	+	0.991701	10.8554	30.115	4.07174e-08	5.32051e-07
SNAI2	chr8	48917690	48921740	-	0.905345	3.38695	30.1122	4.07757e-08	5.32562e-07
FXYD7	chr19	35143250	35154301	+	1.18781	-2.18559	30.0848	4.1356e-08	5.39633e-07
PDK4	chr7	95583499	95596491	-	1.42429	6.07599	30.0816	4.14245e-08	5.40233e-07
HCST	chr19	35902480	35904377	+	1.00899	2.83179	30.0808	4.1441e-08	5.40233e-07
ZNF853	chr7	6615617	6624290	+	1.14284	2.85381	30.073	4.16076e-08	5.4215e-07
FAM66C	chr12	8180209	8216151	+	0.947032	-0.705488	30.0413	4.2294e-08	5.50576e-07
AC079630.4	chr12	40186009	40224915	-	1.03064	-2.14346	30.0403	4.23166e-08	5.50612e-07
ATL1	chr14	50532509	50633068	+	0.70771	2.11458	30.0155	4.28612e-08	5.57437e-07
TMEM155	chr4	121758933	121765427	-	1.25712	-2.04231	30.0039	4.3117e-08	5.605e-07
SMAD9	chr13	36844831	36920765	-	1.27578	3.63793	29.9966	4.32806e-08	5.62363e-07
RELN	chr7	103471784	103989516	-	1.72179	2.19581	29.9627	4.40447e-08	5.71489e-07
IFI16	chr1	158999968	159055155	+	0.781221	6.34164	29.9281	4.4837e-08	5.80682e-07
CCR4	chr3	32951574	32956349	+	1.11123	1.66036	29.882	4.5916e-08	5.94378e-07
ZNF483	chr9	111525159	111577844	+	1.04925	0.445524	29.8507	4.66633e-08	6.03488e-07
NRP1	chr10	33177492	33336262	-	0.625801	6.17782	29.8299	4.71672e-08	6.09154e-07
LINC00996	chr7	150433654	150448140	+	0.961653	-0.602861	29.7885	4.81849e-08	6.21607e-07
TIE1	chr1	43300993	43323108	+	0.745542	4.37711	29.7642	4.87919e-08	6.28965e-07
USHBP1	chr19	17249176	17282786	-	0.744385	0.677591	29.7582	4.89431e-08	6.3062e-07
RADIL	chr7	4797055	4883719	-	1.24915	0.352646	29.7308	4.96401e-08	6.39006e-07
LILRA1	chr19	54573879	54602090	+	0.945067	0.0826883	29.7216	4.98749e-08	6.41731e-07
RP4-742C19.13	chr22	39133090	39136760	+	0.866227	-0.187358	29.6923	5.06351e-08	6.51211e-07
SNTG2	chr2	950868	1367613	+	1.44504	-2.74598	29.6508	5.17316e-08	6.65004e-07
IL11RA	chr9	34650702	34661892	+	0.692866	1.65681	29.6394	5.20376e-08	6.68628e-07
NFATC1	chr18	79395856	79529325	+	0.762555	4.2791	29.5933	5.32897e-08	6.84399e-07
ITGA4	chr2	181457202	181536187	+	0.820653	3.994	29.564	5.40993e-08	6.94153e-07
SLC2A5	chr1	9035107	9088478	-	0.983165	2.33875	29.5543	5.43716e-08	6.97324e-07
P4HA3	chr11	74235801	74311657	-	0.961812	1.59844	29.4994	5.59354e-08	7.16056e-07
MTND5P11	chr5	134924648	134926459	-	1.23701	-0.944757	29.484	5.63796e-08	7.2141e-07
NNMT	chr11	114257787	114313285	+	0.984059	5.52177	29.4793	5.65177e-08	7.22842e-07
ID4	chr6	19837386	19840684	+	1.01959	3.34921	29.4561	5.71987e-08	7.30879e-07
CD302	chr2	159768630	159798255	-	0.864352	4.76098	29.4466	5.74774e-08	7.33763e-07
HMHA1	chr19	1065923	1086628	+	0.695024	5.02959	29.4425	5.76013e-08	7.35007e-07
NTNG2	chr9	132161676	132244534	+	0.891129	1.18646	29.4337	5.78616e-08	7.37649e-07
SPI1	chr11	47354860	47378576	-	0.856061	4.76222	29.3868	5.92808e-08	7.55395e-07
FAM198B	chr4	158124474	158173318	-	0.765627	6.04404	29.3696	5.98081e-08	7.61064e-07
LA16c-390H2.4	chr16	3542739	3545785	+	0.975664	-1.21028	29.3416	6.06798e-08	7.71803e-07
AC007620.3	chr3	179396961	179399191	+	1.36982	0.689987	29.3227	6.12739e-08	7.79002e-07
TENM4	chr11	78652831	79440948	-	1.09765	3.12493	29.3165	6.14696e-08	7.80774e-07
LINC00908	chr18	76528655	76610968	+	1.26094	-2.97283	29.3114	6.1633e-08	7.82491e-07
PCED1B	chr12	47079603	47236662	+	0.844848	3.07861	29.2832	6.2537e-08	7.93604e-07
LST1	chr6	31586124	31588909	+	0.834302	2.94702	29.2766	6.27495e-08	7.95938e-07
DAB2	chr5	39371675	39462300	-	0.689735	5.8622	29.2732	6.28582e-08	7.965e-07
TSHZ1	chr18	75210755	75289950	+	0.613358	4.95447	29.2726	6.28801e-08	7.965e-07
PTX3	chr3	157436789	157443628	+	1.30349	-0.0723566	29.2504	6.36028e-08	8.04919e-07
CHRDL2	chr11	74696429	74731385	-	1.78558	5.1884	29.2424	6.3867e-08	8.07895e-07
POM121L9P	chr22	24251828	24265525	+	0.919868	-0.314098	29.2202	6.46014e-08	8.16811e-07
PIANP	chr12	6693792	6700800	-	1.25458	0.0482561	29.185	6.57854e-08	8.31024e-07
RNF217-AS1	chr6	124909093	124963039	-	1.48497	-3.016	29.1576	6.67236e-08	8.42492e-07
ADD2	chr2	70607618	70768225	-	1.47688	1.37477	29.1127	6.82889e-08	8.60297e-07
LINC00528	chr22	17777322	17779481	+	0.930673	-1.35818	29.1	6.87366e-08	8.65544e-07
AC009948.5	chr2	178413939	178440243	+	0.688027	2.12518	29.0909	6.9061e-08	8.69234e-07
FAM163A	chr1	179743163	179816198	+	1.4775	-0.148002	29.0669	6.99232e-08	8.79288e-07
CPO	chr2	206939554	206969474	+	1.60231	-3.16071	29.0435	7.07706e-08	8.89138e-07
KLRF1	chr12	9827481	9845007	+	1.08582	-2.01441	29.0296	7.12813e-08	8.94338e-07
HTR3A	chr11	113974881	113990313	+	1.86027	0.302753	29.0138	7.18649e-08	9.00635e-07
CTC-457L16.1	chr17	19030857	19033529	+	1.57491	-0.383315	28.9832	7.30101e-08	9.14374e-07
RP11-890B15.3	chr11	130866254	130870247	-	0.712052	2.43411	28.9719	7.34356e-08	9.18145e-07
AC104653.1	chr2	113831049	113843356	-	1.05176	-3.18868	28.9717	7.34436e-08	9.18145e-07
LPPR4	chr1	99263953	99309590	+	1.14877	2.35771	28.9551	7.40768e-08	9.25643e-07
TRAV5	chr14	21749178	21749705	+	1.31465	-3.16448	28.9474	7.43701e-08	9.28889e-07
MEG9	chr14	101069911	101072937	+	1.2692	-3.03271	28.923	7.53139e-08	9.40254e-07
RP11-290O12.2	chr4	154142122	154298819	+	1.52553	-3.30608	28.8746	7.72201e-08	9.63566e-07
CD4	chr12	6786858	6820808	+	0.81495	5.59307	28.8738	7.72507e-08	9.63566e-07
RP11-1336O20.2	chr4	150579089	150581545	+	1.21455	-3.31209	28.8627	7.7695e-08	9.68672e-07
CTD-2541J13.1	chr18	67481791	67484966	-	1.24195	-2.65075	28.8408	7.85801e-08	9.79267e-07
LINC01534	chr19	36685440	36687449	-	0.763266	-0.71623	28.8295	7.90383e-08	9.84534e-07
CYP7B1	chr8	64587763	64798761	-	0.997188	1.47697	28.8224	7.93265e-08	9.87681e-07
PRAM1	chr19	8490056	8503112	-	0.873129	1.1259	28.7989	8.02965e-08	9.99309e-07
CTD-2054N24.2	chr15	99807023	99877148	+	1.17221	-2.01982	28.7734	8.13625e-08	1.01121e-06
VCAN	chr5	83471465	83582303	+	0.890643	7.56226	28.7499	8.23557e-08	1.0231e-06
PTPN7	chr1	202147013	202161588	-	0.951707	3.69484	28.7403	8.27629e-08	1.0277e-06
MYADM	chr19	53866223	53876437	+	0.737807	7.86585	28.7372	8.28944e-08	1.02887e-06
SLC6A16	chr19	49289638	49325225	-	1.05747	-0.730144	28.7194	8.36626e-08	1.03794e-06
TNFSF13B	chr13	108251240	108308484	+	0.858452	3.82267	28.7121	8.39762e-08	1.04136e-06
RPL4P1	chr14	21750269	21751546	+	1.45227	-3.46547	28.6939	8.47701e-08	1.05074e-06
IL21R	chr16	27402162	27452042	+	1.03785	2.58745	28.6912	8.48906e-08	1.05129e-06
KIAA0825	chr5	94152966	94618604	-	0.596127	0.457193	28.688	8.50274e-08	1.05214e-06
TAC3	chr12	57010000	57028883	-	1.55273	0.279621	28.6879	8.50349e-08	1.05214e-06
GZMM	chr19	544034	549924	+	1.17454	0.157023	28.6806	8.53533e-08	1.05561e-06
RP11-1000B6.7	chr15	32583612	32584312	+	0.883013	-2.10821	28.6686	8.58853e-08	1.06172e-06
PMCH	chr12	102196459	102197845	-	1.36899	-2.02854	28.6536	8.65523e-08	1.06948e-06
ACACB	chr12	109116595	109268226	+	0.852818	4.6026	28.632	8.75222e-08	1.08051e-06
OR7E13P	chr11	86832540	86833449	-	1.26183	-3.34361	28.6266	8.77697e-08	1.08308e-06
PGM5P3-AS1	chr9	72674	88826	+	1.61727	-1.6339	28.623	8.79326e-08	1.08461e-06
KLHL42	chr12	27780020	27803040	+	0.673306	5.19909	28.6191	8.81109e-08	1.08632e-06
ITGAL	chr16	30472658	30523185	+	0.987001	4.71341	28.6028	8.88538e-08	1.09499e-06
STAC	chr3	36380344	36548007	+	1.38762	0.687623	28.5844	8.97029e-08	1.10497e-06
HTRA3	chr4	8269765	8307111	+	0.940115	5.83555	28.5573	9.09665e-08	1.11954e-06
RP4-639F20.1	chr1	94927566	94963270	+	0.92218	0.131179	28.5204	9.27168e-08	1.14057e-06
TTC24	chr1	156579727	156586770	+	1.37441	-2.03028	28.5141	9.3017e-08	1.14376e-06
[truncated: 2,077 more rows]

## Sheet: Intestinal
gene	chrom	chromStart	chromEnd	strand	logFC	logCPM	LR	PValue	FDR
GRB7	chr17	39737927	39747291	+	2.45093	6.79851	64.2748	1.08222e-15	5.78185e-14
TDRD12	chr19	32719753	32829580	+	4.00696	0.185891	61.5259	4.36958e-15	2.05008e-13
SLC22A31	chr16	89195761	89201664	-	4.03214	0.818102	59.2357	1.39871e-14	6.06939e-13
LINC00176	chr20	64034344	64039962	+	2.54484	1.38332	58.8058	1.74024e-14	7.46955e-13
XPO5	chr6	43522330	43576075	-	0.89691	6.09682	57.6681	3.10298e-14	1.25973e-12
ERBB2	chr17	39687914	39730426	+	2.43974	9.49983	57.5151	3.35391e-14	1.34584e-12
CDC6	chr17	40287633	40304657	+	1.87293	5.59905	56.6814	5.12458e-14	1.96807e-12
NOTUM	chr17	81952507	81961840	-	4.68005	6.91888	55.0234	1.19105e-13	4.24491e-12
JUP	chr17	41754604	41786931	-	1.79033	10.2428	54.0227	1.98184e-13	6.72614e-12
LCN12	chr9	136949551	136955497	+	1.84639	0.213118	53.6376	2.41096e-13	8.01572e-12
DHRS2	chr14	23630115	23645639	+	3.55079	3.87704	52.5379	4.22017e-13	1.32974e-11
TOMM34	chr20	44942130	44960486	-	0.828092	5.70468	50.6221	1.11979e-12	3.28914e-11
PGAP3	chr17	39671122	39696797	-	2.17906	6.57623	48.0466	4.16213e-12	1.10756e-10
LINC01287	chr7	153399920	153413963	-	5.03161	0.0562399	47.7693	4.79433e-12	1.26246e-10
DNMT3B	chr20	32762385	32809356	+	1.45445	2.95495	46.1766	1.08059e-11	2.67524e-10
C6orf132	chr6	42101118	42142619	-	1.03599	6.50414	45.959	1.20755e-11	2.96834e-10
RTKN	chr2	74425836	74442422	-	0.791911	5.56812	45.1901	1.78803e-11	4.28078e-10
HSP90AB1	chr6	44246166	44253888	+	0.6926	10.2398	45.1114	1.86136e-11	4.43783e-10
MIEN1	chr17	39728496	39730787	-	2.14205	7.35452	44.9654	2.00542e-11	4.76898e-10
STARD3	chr17	39637065	39663484	+	1.61085	6.19243	44.473	2.57884e-11	6.05471e-10
SKA3	chr13	21153595	21176602	-	0.983929	4.19145	44.3644	2.72599e-11	6.37321e-10
GLDC	chr9	6532464	6645650	-	2.75802	2.67707	43.5066	4.22531e-11	9.57184e-10
CA4	chr17	60149936	60170899	+	3.57322	1.78147	43.449	4.35162e-11	9.82588e-10
FBXL6	chr8	144355431	144359376	-	0.823235	5.01462	43.1546	5.05816e-11	1.13107e-09
DDX27	chr20	49219295	49244077	+	0.649945	6.04419	43.032	5.38511e-11	1.19934e-09
PNPLA3	chr22	43923739	43964488	+	2.1555	0.315365	42.5455	6.90561e-11	1.4971e-09
CMTM8	chr3	32238679	32370325	+	0.829957	3.71309	42.4292	7.32863e-11	1.58385e-09
ARHGAP39	chr8	144529179	144605816	-	0.882476	4.33402	42.1972	8.25177e-11	1.76547e-09
CYP17A1	chr10	102830531	102837533	-	4.2673	2.7975	41.658	1.08719e-10	2.28723e-09
RP5-1120P11.1	chr6	43995723	44074652	-	1.78247	0.320661	41.5177	1.16807e-10	2.43703e-09
TBX4	chr17	61452404	61485110	+	3.22005	0.185942	41.3144	1.29607e-10	2.68994e-09
LY6G6C	chr6	31718648	31721845	-	2.75594	0.599965	41.1666	1.39791e-10	2.88188e-09
POLR1C	chr6	43509702	43529585	+	0.671947	4.78079	41.1504	1.40953e-10	2.90253e-09
INHA	chr2	219569162	219575713	+	3.3255	0.245216	40.8962	1.60531e-10	3.27776e-09
RP11-480I12.5	chr1	202851828	202861620	-	1.28655	1.5527	40.7007	1.77422e-10	3.58831e-09
MCUR1	chr6	13786557	13814568	-	0.727242	5.47469	40.6657	1.80627e-10	3.63984e-09
FOXP4	chr6	41546426	41602384	+	0.802684	7.58641	40.3453	2.12819e-10	4.21504e-09
EFNA1	chr1	155127460	155134857	+	0.890737	5.89348	40.2937	2.18512e-10	4.31853e-09
RAE1	chr20	57351010	57379211	+	0.643038	5.40019	39.8164	2.78996e-10	5.42116e-09
SPATA2	chr20	49903391	49915508	-	0.655832	5.06108	39.7182	2.93376e-10	5.68863e-09
AP001626.1	chr21	42599280	42615058	-	3.36126	-0.461086	39.4748	3.32313e-10	6.38556e-09
NKD2	chr5	1008829	1038943	+	2.02718	3.02563	39.2934	3.64673e-10	6.93045e-09
TDRD1	chr10	114179270	114232304	+	3.16344	-0.0891646	39.1353	3.95439e-10	7.44382e-09
LRRC1	chr6	53794497	53924121	+	0.666078	5.12097	38.5763	5.26553e-10	9.69472e-09
CAMSAP3	chr19	7595902	7618304	+	0.918549	5.75429	38.3976	5.77041e-10	1.05682e-08
RHPN1	chr8	143368855	143384220	+	0.992037	3.77533	38.3942	5.7804e-10	1.05725e-08
CAMKV	chr3	49857988	49870222	-	2.96964	-0.453623	38.3162	6.01623e-10	1.09749e-08
CSE1L	chr20	49046246	49096960	+	0.664393	7.05855	38.1062	6.69985e-10	1.21739e-08
SLC13A5	chr17	6684713	6713567	-	2.98378	0.968828	37.7759	7.93546e-10	1.42694e-08
CCNE1	chr19	29811898	29824308	+	1.84417	4.4574	37.4503	9.37716e-10	1.66994e-08
DSN1	chr20	36751791	36773818	-	0.647492	4.26499	37.4269	9.49027e-10	1.68684e-08
MED24	chr17	40019097	40061215	-	1.02918	6.80571	37.306	1.00973e-09	1.78786e-08
BZW2	chr7	16646131	16706523	+	0.671694	6.42465	36.8756	1.25914e-09	2.20552e-08
CCDC150	chr2	196639554	196763490	+	1.00889	0.936145	36.621	1.43475e-09	2.48642e-08
CLCN2	chr3	184346185	184361651	-	0.895849	3.89349	36.5279	1.50499e-09	2.5935e-08
RP1-239B22.5	chr11	17380649	17383531	+	1.15675	2.30922	36.51	1.51881e-09	2.61089e-08
ZMYND8	chr20	47209214	47356889	-	0.745413	6.41274	36.4463	1.56927e-09	2.68971e-08
PABPC1L	chr20	44910062	44959035	+	1.12599	3.99816	36.3099	1.68308e-09	2.87014e-08
HMGCS1	chr5	43289395	43313512	-	0.891667	6.16992	36.2908	1.69961e-09	2.8945e-08
CFAP74	chr1	1921951	2003837	-	2.13447	-0.780376	36.2029	1.77801e-09	3.01705e-08
PPP1R16A	chr8	144477969	144502121	+	0.741726	5.66651	36.2018	1.77902e-09	3.01705e-08
ARFGEF2	chr20	48921890	49036693	+	0.605352	6.66205	35.9025	2.07444e-09	3.47553e-08
PI3	chr20	45174876	45176544	+	2.57608	7.00333	35.6758	2.33039e-09	3.86928e-08
OTOG	chr11	17547373	17647150	+	2.76776	-2.45957	35.5648	2.46708e-09	4.06943e-08
ASCL5	chr1	201113953	201127184	-	1.6925	-1.24499	35.4698	2.59037e-09	4.25507e-08
RP11-43F13.4	chr5	1005039	1006623	+	2.10578	-1.96791	35.1831	3.00112e-09	4.87779e-08
TCAP	chr17	39664187	39666555	+	1.74873	0.00714979	35.1772	3.01028e-09	4.88981e-08
RHPN1-AS1	chr8	143366631	143368548	-	1.18783	0.253448	35.1674	3.02546e-09	4.90585e-08
TOP2A	chr17	40388516	40417950	-	1.11447	7.64067	35.0379	3.23345e-09	5.21261e-08
C20orf144	chr20	33662284	33665619	+	0.881749	-1.29838	35.0191	3.26486e-09	5.25714e-08
CKS1B	chr1	154974653	154979249	+	0.713282	5.53577	35.0074	3.28449e-09	5.28261e-08
LPIN3	chr20	41340920	41360582	+	0.735445	4.37461	34.9727	3.34369e-09	5.36849e-08
CHDH	chr3	53812335	53846390	-	0.860118	5.29553	34.8969	3.47638e-09	5.54301e-08
IL17RB	chr3	53846580	53865800	+	1.06864	4.38739	34.7458	3.75692e-09	5.95267e-08
TSPO2	chr6	41042554	41044337	+	1.64303	-1.56151	34.6594	3.92746e-09	6.20516e-08
DHCR24	chr1	54849633	54887218	-	0.975438	7.75409	34.5579	4.1375e-09	6.51844e-08
TF	chr3	133745956	133779006	+	3.35692	3.42379	34.1791	5.02667e-09	7.80401e-08
ABCC10	chr6	43427366	43450430	+	0.594058	4.93635	34.1457	5.1135e-09	7.92107e-08
DKC1	chrX	154762742	154777689	+	0.586475	6.10707	34.1308	5.15304e-09	7.97786e-08
SQLE	chr8	124998497	125022283	+	1.01586	5.59798	34.1227	5.17454e-09	8.00667e-08
SLC52A2	chr8	144354135	144361272	+	0.697616	6.25505	34.1101	5.20804e-09	8.04954e-08
TMEM63B	chr6	44126914	44155519	+	0.711211	6.25909	34.1031	5.22674e-09	8.06944e-08
HOXD10	chr2	176108790	176119942	+	3.42088	0.290705	34.0117	5.47808e-09	8.43868e-08
PCSK6	chr15	101297142	101525202	-	0.921022	4.85754	33.9837	5.55767e-09	8.53756e-08
MLLT4	chr6	167826922	167972023	+	0.596616	6.90753	33.6995	6.43182e-09	9.78823e-08
CTA-315H11.2	chr7	73609262	73611502	-	1.94243	-0.345495	33.5992	6.77198e-09	1.02833e-07
SLC26A6	chr3	48625723	48635493	-	0.764204	4.57998	33.5859	6.81868e-09	1.03486e-07
MIPEP	chr13	23730189	23889419	-	0.642594	4.32742	33.5577	6.91804e-09	1.04764e-07
SALL4	chr20	51782331	51802520	-	1.90471	3.01073	33.5388	6.98556e-09	1.05614e-07
NKPD1	chr19	45149750	45160150	-	1.64661	-0.765653	33.4858	7.17871e-09	1.08121e-07
RP11-384L8.1	chr3	32236688	32238578	-	0.980657	0.549128	33.4572	7.28482e-09	1.09541e-07
IDH1	chr2	208236227	208266074	-	0.715918	6.99134	33.3493	7.70048e-09	1.15416e-07
LGALS7B	chr19	38789211	38791749	+	2.99149	1.91862	33.2995	7.90032e-09	1.18155e-07
PNKD	chr2	218270392	218346793	+	0.696681	6.61108	33.1508	8.52833e-09	1.27136e-07
AC006273.4	chr19	781002	781862	-	1.82161	-3.3865	33.0262	9.09254e-09	1.34967e-07
ZNF695	chr1	246945547	247008093	-	1.24121	1.35453	32.9754	9.33347e-09	1.38247e-07
AACSP1	chr5	178764861	178818435	-	3.66761	-0.894684	32.8419	9.99668e-09	1.47049e-07
MYBL2	chr20	43667019	43716496	+	0.976509	6.45888	32.8393	1.00103e-08	1.47171e-07
CLDN19	chr1	42733093	42740254	-	2.88228	-1.00637	32.7478	1.04923e-08	1.539e-07
SOX9	chr17	72121020	72126420	+	0.754249	7.75777	32.7342	1.05664e-08	1.54773e-07
FAM83H	chr8	143723933	143733801	-	0.807825	7.94416	32.6699	1.09215e-08	1.59468e-07
RECQL4	chr8	144511288	144517845	-	0.920111	4.87063	32.6321	1.11359e-08	1.62257e-07
MOCS3	chr20	50958826	50963931	+	0.589614	3.56956	32.5155	1.18246e-08	1.71482e-07
WIF1	chr12	65050626	65121566	-	5.07189	1.96553	32.4773	1.20595e-08	1.74432e-07
MAGEA10	chrX	152133310	152138578	-	6.63306	0.976401	32.4732	1.20849e-08	1.74709e-07
MSH5	chr6	31739948	31762834	+	0.739836	3.58589	32.3804	1.26756e-08	1.82581e-07
SPIRE2	chr16	89818179	89871319	+	0.898491	4.44365	32.3678	1.27583e-08	1.83677e-07
DAPL1	chr2	158795317	158862958	+	2.94688	0.973338	32.3467	1.28979e-08	1.85591e-07
TRAIP	chr3	49828599	49856574	-	0.714233	2.17475	32.3229	1.30567e-08	1.87779e-07
RP11-288C17.1	chr18	1362445	1363873	-	3.78391	-3.13208	32.32	1.30757e-08	1.87955e-07
CNKSR1	chr1	26177403	26189886	+	0.724234	4.48814	32.2751	1.33817e-08	1.91954e-07
TPX2	chr20	31739271	31801805	+	0.834706	6.55903	32.1852	1.40158e-08	2.00428e-07
RP11-1260E13.3	chr17	354737	356882	+	1.26561	-2.25617	32.1237	1.44662e-08	2.06337e-07
RELL2	chr5	141636950	141641077	+	0.991604	1.87367	31.9518	1.5805e-08	2.24164e-07
RP11-429J17.7	chr8	143758153	143771822	-	1.0677	-0.73989	31.948	1.58355e-08	2.24483e-07
RP4-591C20.9	chr20	63861212	63864293	-	0.692305	3.30114	31.9319	1.59671e-08	2.26116e-07
KIFC2	chr8	144466043	144474202	+	0.800873	4.24424	31.8731	1.64579e-08	2.31764e-07
RP11-351J23.1	chr6	167679626	167683787	-	2.01597	-0.263272	31.8203	1.69118e-08	2.37554e-07
SLC29A2	chr11	66362521	66372214	-	0.825843	4.45657	31.7808	1.72594e-08	2.41946e-07
PLAGL2	chr20	32192503	32207791	-	0.824141	6.13783	31.6973	1.80172e-08	2.51804e-07
TPRN	chr9	137191617	137204193	-	0.797703	5.2606	31.6048	1.88959e-08	2.63555e-07
ADCK5	chr8	144373101	144393242	+	0.643175	3.67047	31.5871	1.90696e-08	2.65577e-07
AC106875.1	chr2	11681460	11683328	+	4.96783	-1.58618	31.5832	1.9108e-08	2.65977e-07
TNFRSF19	chr13	23570370	23676104	+	1.71263	4.18058	31.488	2.00672e-08	2.78629e-07
EFNA4	chr1	155063731	155069553	+	0.735237	3.5933	31.4448	2.05194e-08	2.84338e-07
MFSD3	chr8	144509074	144511213	+	0.746723	3.97149	31.4432	2.05356e-08	2.8442e-07
PNMA5	chrX	152988824	152994127	-	5.37938	2.54732	31.4201	2.07824e-08	2.87695e-07
F2	chr11	46719180	46739506	+	3.08956	0.109717	31.3875	2.11332e-08	2.9226e-07
BYSL	chr6	41921188	41933046	+	0.645946	4.11452	31.3493	2.1554e-08	2.97931e-07
RHBG	chr1	156369212	156385219	+	2.32923	-1.53301	31.3051	2.20498e-08	3.04329e-07
RSPO4	chr20	958452	1002264	-	2.82334	0.687548	31.2919	2.22006e-08	3.06106e-07
CCDC138	chr2	108786757	108885477	+	0.645983	2.46935	31.2005	2.32708e-08	3.19273e-07
TROAP	chr12	49323236	49331731	+	0.810844	4.30299	31.1742	2.35881e-08	3.23147e-07
MSH5-SAPCD1	chr6	31740020	31764851	+	0.901663	2.05245	31.1413	2.39912e-08	3.28507e-07
ELMO3	chr16	67199111	67204029	+	0.799623	5.01836	31.1021	2.44808e-08	3.33893e-07
RASSF7	chr11	560404	564021	+	0.729518	5.36622	31.0895	2.46407e-08	3.35743e-07
IQGAP3	chr1	156525405	156572604	-	0.781213	5.86373	31.0768	2.48019e-08	3.37746e-07
TTK	chr6	80003887	80042527	+	0.874812	4.15343	30.9931	2.58946e-08	3.51447e-07
AHCY	chr20	34280268	34311802	-	0.605497	7.52969	30.9663	2.62545e-08	3.55461e-07
FASN	chr17	82078338	82098332	-	0.76593	8.40305	30.9297	2.67548e-08	3.61528e-07
PSRC1	chr1	109279556	109283186	-	0.799743	2.81612	30.9209	2.68768e-08	3.62647e-07
ZFP41	chr8	143246821	143262705	+	0.620528	4.20619	30.8643	2.76721e-08	3.72471e-07
RP5-908M14.10	chr20	62402236	62405935	-	1.08364	0.467085	30.6512	3.08835e-08	4.12693e-07
PARD6B	chr20	50731544	50756795	+	0.833078	4.48427	30.531	3.28567e-08	4.36745e-07
TONSL	chr8	144428775	144444444	-	0.765534	5.20976	30.436	3.45064e-08	4.5714e-07
PCYT2	chr17	81900965	81911464	-	0.701618	5.61108	30.3729	3.56474e-08	4.70682e-07
RP11-259G18.1	chr17	46267037	46268694	+	1.13466	-2.27991	30.236	3.82536e-08	5.02223e-07
EXO1	chr1	241847967	241895148	+	0.811743	3.45943	30.1914	3.91449e-08	5.12469e-07
SUV420H2	chr19	55339853	55348120	+	0.622477	3.62061	30.1885	3.92033e-08	5.12992e-07
PNMT	chr17	39667981	39670475	+	2.29541	-0.434683	29.9779	4.3701e-08	5.6756e-07
LLGL2	chr17	75525080	75575208	+	0.690891	7.3574	29.9635	4.40258e-08	5.71489e-07
ESRP2	chr16	68229111	68238102	-	0.745807	5.78772	29.9301	4.47899e-08	5.80343e-07
FOXH1	chr8	144473412	144476335	-	1.98375	0.862161	29.8351	4.7041e-08	6.07806e-07
NEK2	chr1	211658657	211675630	-	0.851134	4.24426	29.524	5.52274e-08	7.07646e-07
POLRMTP1	chr17	62136972	62140639	-	1.23799	1.13287	29.5101	5.56274e-08	7.12442e-07
HS3ST4	chr16	25692026	26137688	+	3.85446	-0.287736	29.4699	5.67931e-08	7.2603e-07
ORC5	chr7	104126341	104208047	-	0.702373	4.08202	29.4498	5.73852e-08	7.32923e-07
RP11-67L3.4	chr1	54887563	54888850	+	1.16754	-3.31552	29.441	5.76439e-08	7.35212e-07
PSMD3	chr17	39980797	39997960	+	0.913808	7.39283	29.3792	5.9513e-08	7.57657e-07
PUS7	chr7	105439661	105522267	-	0.725624	4.52209	29.3215	6.1311e-08	7.79117e-07
PYCRL	chr8	143603913	143609773	-	0.722043	4.06848	29.1433	6.7217e-08	8.48336e-07
AARS2	chr6	44299654	44313326	-	0.629274	4.24169	29.0827	6.93532e-08	8.72516e-07
FGFR3	chr4	1793307	1808872	+	1.32556	5.04737	29.0459	7.06825e-08	8.88433e-07
HGH1	chr8	144137769	144140843	+	0.627527	5.29958	29.0391	7.09337e-08	8.90381e-07
DHCR7	chr11	71428193	71452868	-	0.829158	6.09385	29.0154	7.18045e-08	9.00496e-07
HNF4A	chr20	44355700	44434596	+	1.00802	7.04994	29.0134	7.18806e-08	9.00635e-07
CALN1	chr7	71779491	72447151	-	3.24493	-0.998774	28.9785	7.31864e-08	9.16168e-07
TRIP13	chr5	892643	919357	+	0.853934	4.31163	28.7784	8.11494e-08	1.00947e-06
FANCD2	chr3	10026414	10101930	+	0.695967	4.21979	28.6925	8.48305e-08	1.05102e-06
RALY-AS1	chr20	33983052	33994357	-	0.721407	0.664166	28.5654	9.05878e-08	1.11537e-06
PMFBP1	chr16	72112157	72176878	-	1.25854	0.658286	28.4695	9.51865e-08	1.16836e-06
RP11-486A14.1	chr12	93314809	93315941	+	1.11521	0.292112	28.4678	9.52688e-08	1.16886e-06
COL9A3	chr20	62816244	62841159	+	2.25681	4.2317	28.4508	9.61081e-08	1.17707e-06
PRR36	chr19	7868719	7874379	-	1.99183	2.96024	28.4203	9.76378e-08	1.19422e-06
FOXP4-AS1	chr6	41494853	41548621	-	1.22642	0.867316	28.3679	1.00314e-07	1.22157e-06
KLRG2	chr7	139452690	139483712	-	2.43548	-0.258457	28.1924	1.09833e-07	1.33222e-06
TOP1MT	chr8	143304384	143359979	-	0.648288	4.73212	28.1626	1.11541e-07	1.34939e-06
RP11-44N21.1	chr14	105093609	105099004	+	1.0264	-0.588712	28.1037	1.14983e-07	1.38499e-06
HCN3	chr1	155277583	155289848	+	0.737004	2.64012	28.1012	1.15133e-07	1.3856e-06
TMEM63A	chr1	225845536	225882369	-	0.602218	7.03003	27.9995	1.21347e-07	1.45218e-06
TMEM74B	chr20	1180561	1185415	-	1.33533	2.243	27.9351	1.25454e-07	1.49745e-06
TM7SF2	chr11	65111845	65116384	+	0.903257	3.73915	27.9203	1.26418e-07	1.50766e-06
MKRN9P	chr12	87782163	87784568	-	3.07039	-1.46358	27.8577	1.30571e-07	1.55385e-06
RP3-337H4.9	chr6	43519180	43519724	-	0.958944	-0.472071	27.7982	1.34654e-07	1.60038e-06
AC006262.5	chr19	46189166	46203083	-	3.25446	0.823386	27.7302	1.39466e-07	1.65058e-06
ECT2	chr3	172750682	172821474	+	0.782059	6.56458	27.7301	1.39473e-07	1.65058e-06
NELFCD	chr20	58981208	58995133	+	0.621468	6.4707	27.6414	1.46018e-07	1.72216e-06
NCAPD2P1	chr7	34750253	34752053	-	2.32765	-1.71437	27.6241	1.47328e-07	1.73318e-06
RIPK4	chr21	41739369	41767106	-	0.815473	4.60377	27.5445	1.53524e-07	1.7992e-06
COL2A1	chr12	47972965	48004486	-	4.21594	2.92524	27.4962	1.57404e-07	1.84156e-06
RP3-453C12.14	chr20	45345115	45345823	-	0.996365	-1.1123	27.476	1.59052e-07	1.86006e-06
ASPSCR1	chr17	81976807	82017406	+	0.855009	4.98602	27.405	1.65002e-07	1.92234e-06
MSX2	chr5	174724533	174730893	+	1.24606	3.87426	27.371	1.67928e-07	1.95315e-06
UBE2C	chr20	45812576	45816957	+	0.919161	5.82288	27.3624	1.68677e-07	1.96103e-06
MAGEA1	chrX	153179285	153183880	+	5.76074	1.50436	27.3544	1.69377e-07	1.96588e-06
EVX1	chr7	27242700	27250493	+	2.57577	0.724645	27.3536	1.69452e-07	1.96593e-06
MAP3K9	chr14	70722526	70809534	-	0.722022	4.07725	27.3419	1.70476e-07	1.97532e-06
RAPGEFL1	chr17	40177010	40195656	+	1.22916	5.93327	27.2781	1.76198e-07	2.03568e-06
CTD-2228K2.7	chr5	473236	480884	+	1.51939	2.58052	27.2629	1.77588e-07	2.0497e-06
ABHD11	chr7	73736094	73738867	-	0.767899	5.50661	27.26	1.77857e-07	2.05142e-06
GYLTL1B	chr11	45921621	45929096	+	1.34394	4.54629	27.1745	1.85893e-07	2.13877e-06
RP11-1275H24.1	chr7	5426277	5428927	-	0.913688	1.19899	27.1272	1.90494e-07	2.18555e-06
AHSG	chr3	186612923	186621318	+	3.10774	-0.709561	27.117	1.91506e-07	2.19606e-06
SNHG17	chr20	38420588	38435353	-	0.680093	4.2504	27.0682	1.96399e-07	2.25031e-06
RP4-794I6.4	chr20	3239705	3245382	+	1.20238	0.794791	27.0315	2.00167e-07	2.28969e-06
LINC00470	chr18	1254383	1408344	-	3.18293	-1.65695	26.9797	2.05603e-07	2.34705e-06
RP11-872J21.3	chr14	96500810	96502321	-	0.729656	-0.524961	26.9747	2.06131e-07	2.3521e-06
RAB3IP	chr12	69738681	69823204	+	0.735605	5.13829	26.9049	2.13714e-07	2.43562e-06
MRPL14	chr6	44113454	44127457	-	0.596917	5.02102	26.888	2.15593e-07	2.45603e-06
B4GALNT4	chr11	369796	382116	+	2.03997	2.87093	26.8868	2.15729e-07	2.45656e-06
C8orf82	chr8	144525733	144529132	-	0.598369	5.18046	26.8565	2.19135e-07	2.48819e-06
RP11-156E6.1	chr17	41848518	41851447	-	0.863919	3.90796	26.8372	2.21341e-07	2.51221e-06
IGFBP1	chr7	45888357	45893668	+	2.72557	1.02666	26.8147	2.23933e-07	2.53955e-06
ACVR1B	chr12	51951667	51997078	+	0.607054	6.04716	26.7063	2.36849e-07	2.66857e-06
C9orf117	chr9	127706989	127716002	+	0.688407	0.866195	26.6951	2.38226e-07	2.68191e-06
ARHGEF39	chr9	35658875	35675866	-	0.780559	3.73493	26.6882	2.39082e-07	2.69013e-06
KRT23	chr17	40922696	40937634	-	2.8366	5.27603	26.6761	2.40573e-07	2.70503e-06
CFAP52	chr17	9576627	9643459	+	1.11769	-2.72497	26.6737	2.40879e-07	2.70737e-06
GLYCTK	chr3	52287089	52293476	+	0.761078	3.73469	26.5825	2.52519e-07	2.82447e-06
POU5F1B	chr8	127414290	127420069	+	1.50696	-0.0220043	26.5488	2.56967e-07	2.86959e-06
PIF1	chr15	64815632	64825668	-	0.630107	2.25801	26.4736	2.67165e-07	2.9703e-06
SCD	chr10	100347124	100364834	+	1.09636	7.9961	26.4653	2.68311e-07	2.98039e-06
C17orf53	chr17	44141906	44162476	+	0.675465	2.54233	26.4647	2.68394e-07	2.98039e-06
P3H4	chr17	41801947	41812604	-	1.09192	5.36192	26.4453	2.71107e-07	3.0033e-06
HSPA6	chr1	161524540	161526910	+	1.40068	3.01813	26.4349	2.72569e-07	3.01829e-06
ARHGAP8	chr22	44752558	44862788	+	0.741029	4.10383	26.4278	2.73579e-07	3.02652e-06
HIC2	chr22	21417404	21451463	+	0.93774	3.70875	26.3984	2.77775e-07	3.06614e-06
TIMELESS	chr12	56416373	56449403	-	0.605781	5.27168	26.3796	2.80493e-07	3.09122e-06
RP5-1148A21.3	chr6	63571005	63572408	-	0.992695	0.384883	26.3555	2.84002e-07	3.12616e-06
C6orf222	chr6	36315757	36336885	-	1.33749	4.67009	26.3221	2.88963e-07	3.1707e-06
SCARB1	chr12	124776856	124882668	-	0.728326	5.92173	26.252	2.99652e-07	3.2802e-06
LBX2-AS1	chr2	74502595	74504678	+	0.651905	3.95741	26.0943	3.25136e-07	3.53608e-06
SLC25A10	chr17	81712236	81721016	+	0.684943	5.3814	26.0931	3.25347e-07	3.53634e-06
ACY1	chr3	51983340	51989197	+	0.742353	5.59833	26.0838	3.26919e-07	3.55204e-06
C1orf116	chr1	207018521	207032756	-	0.917483	6.59303	26.0829	3.27073e-07	3.55233e-06
CDC42BPG	chr11	64823387	64844569	-	0.746626	4.94104	26.0733	3.28693e-07	3.56852e-06
URI1	chr19	29923644	30016608	+	0.924663	6.50362	25.9663	3.47427e-07	3.76013e-06
LBX2	chr2	74497517	74503316	-	0.955596	0.25819	25.8833	3.62703e-07	3.91324e-06
TIGD5	chr8	143597835	143603224	+	0.585751	3.87826	25.8623	3.66668e-07	3.94987e-06
PCAT14	chr22	23536881	23547797	+	3.86606	-0.300844	25.8282	3.73195e-07	4.01394e-06
CHST13	chr3	126524283	126543291	+	1.80815	2.02406	25.7851	3.8163e-07	4.09356e-06
CFAP43	chr10	104129888	104232362	-	1.01592	0.0119191	25.7811	3.82424e-07	4.0989e-06
ACTBP8	chr6	88275882	88276989	-	4.92291	-1.79932	25.778	3.83036e-07	4.10387e-06
PRR15	chr7	29563811	29567295	+	0.826619	5.29438	25.705	3.97789e-07	4.2439e-06
SEPT14	chr7	55793544	55862789	-	4.48545	-1.72581	25.6669	4.05731e-07	4.31866e-06
UBE2T	chr1	202331657	202341980	-	0.705449	4.21552	25.6233	4.15006e-07	4.40892e-06
AMACR	chr5	33986178	34008108	-	0.981239	5.2905	25.6078	4.18349e-07	4.44104e-06
AC018804.7	chr2	130229379	130232106	+	1.75251	-0.873475	25.6	4.20042e-07	4.4573e-06
APOH	chr17	66212033	66256525	-	3.14776	1.80215	25.4693	4.49474e-07	4.746e-06
TNNT2	chr1	201359008	201377762	-	1.39162	-0.354982	25.4575	4.52241e-07	4.77341e-06
RP11-242J7.1	chr4	184584093	184625030	-	2.06338	-1.84085	25.4543	4.5298e-07	4.77938e-06
C2orf15	chr2	99141485	99151487	+	0.639752	1.83191	25.4514	4.53663e-07	4.78478e-06
ATP5G1P4	chr3	172828736	172829176	-	1.1201	-2.08738	25.4356	4.57389e-07	4.81857e-06
ELF3	chr1	202007945	202017188	+	0.732949	8.47691	25.4172	4.61794e-07	4.85944e-06
PLXNA3	chrX	154458281	154477779	+	0.629099	5.80593	25.4097	4.63588e-07	4.87462e-06
NUF2	chr1	163266576	163355764	+	0.74967	3.71707	25.3375	4.81252e-07	5.03743e-06
TIGD1	chr2	232547968	232550592	-	0.618133	2.06946	25.3323	4.82548e-07	5.04719e-06
GPR1-AS	chr2	206203376	206266243	+	3.99338	-2.48778	25.3037	4.89764e-07	5.11495e-06
BORA	chr13	72727749	72756198	+	0.628936	3.68579	25.2951	4.91965e-07	5.13599e-06
NCR3LG1	chr11	17351726	17377341	+	0.954676	4.0455	25.2877	4.93843e-07	5.15366e-06
SOAT2	chr12	53103518	53124538	+	2.73082	-0.566084	25.2736	4.97464e-07	5.1856e-06
OSBP2	chr22	30693782	30907824	+	1.04393	3.19639	25.2685	4.98791e-07	5.19747e-06
RP11-560J1.2	chr6	15243923	15245000	-	1.00652	-1.88885	25.2182	5.1196e-07	5.3247e-06
ARHGEF19	chr1	16197854	16212609	-	0.882479	3.47714	25.2076	5.14794e-07	5.34823e-06
RP11-297D21.2	chr16	67430667	67431464	-	0.981868	-3.16022	25.1989	5.17124e-07	5.36834e-06
ZSCAN10	chr16	3088890	3099317	-	2.41935	-2.70364	25.1951	5.1814e-07	5.37686e-06
CYP51A1	chr7	92112151	92142952	-	0.973925	6.87519	25.1566	5.28585e-07	5.47501e-06
CGN	chr1	151510510	151538692	+	0.823661	6.6279	25.155	5.29019e-07	5.47746e-06
PKP3	chr11	392614	404908	+	0.695892	6.94937	25.1502	5.30342e-07	5.4891e-06
VEGFA	chr6	43770184	43786487	+	0.822736	7.31675	25.1249	5.37358e-07	5.55551e-06
CREG2	chr2	101345551	101387595	-	1.64794	1.24925	25.0591	5.56012e-07	5.73553e-06
ESPL1	chr12	53268299	53293643	+	0.746195	4.79729	25.0526	5.57887e-07	5.75273e-06
ZDHHC23	chr3	113947901	113965401	+	0.61452	3.87376	25.0034	5.72298e-07	5.89256e-06
VPS9D1-AS1	chr16	89711856	89718165	+	0.996745	3.12487	24.9639	5.84136e-07	6.00777e-06
IGF2BP1	chr17	48997412	49055650	+	2.93867	3.41615	24.956	5.86531e-07	6.03015e-06
TMEM184A	chr7	1542235	1560821	-	0.885566	4.92336	24.9005	6.03653e-07	6.19013e-06
LPAR2	chr19	19623668	19628930	-	0.583452	4.25989	24.892	6.06345e-07	6.21543e-06
DARS2	chr1	173824503	173858546	+	0.610694	5.43959	24.8718	6.12723e-07	6.27385e-06
RP11-299G20.2	chr15	101295419	101305737	+	0.78175	0.932087	24.8679	6.1397e-07	6.2843e-06
AURKA	chr20	56369389	56392337	-	0.812533	5.21495	24.8521	6.19027e-07	6.33138e-06
USH1G	chr17	74916084	74923256	-	2.50458	-1.51464	24.8274	6.27012e-07	6.39899e-06
TMPRSS5	chr11	113687550	113706373	-	1.6773	0.351251	24.7951	6.37606e-07	6.50161e-06
WIPF2	chr17	40219304	40284136	+	0.802373	6.81728	24.7562	6.50592e-07	6.61761e-06
SPAG5	chr17	28577565	28599279	-	0.674814	5.16896	24.7261	6.60848e-07	6.7144e-06
CDCA8	chr1	37692418	37709719	+	0.672452	4.77186	24.7254	6.61076e-07	6.7144e-06
RP11-492E3.2	chr9	129575409	129584556	+	1.71352	0.966439	24.7065	6.67592e-07	6.77525e-06
RP11-299G20.5	chr15	101299656	101301648	-	0.843392	0.582127	24.6429	6.89968e-07	6.98737e-06
ZIC1	chr3	147393422	147510293	+	3.68742	0.243058	24.5714	7.16067e-07	7.23056e-06
HPN-AS1	chr19	35059059	35106304	-	1.89462	-3.4291	24.5383	7.28483e-07	7.34255e-06
RRBP1	chr20	17613678	17682295	-	0.621742	9.01965	24.5133	7.37968e-07	7.42796e-06
RTN4R	chr22	20241415	20283246	-	0.83667	3.1712	24.4929	7.45835e-07	7.49091e-06
CHTF18	chr16	788046	800737	+	0.64964	3.99271	24.4912	7.46517e-07	7.49436e-06
CTD-2006C1.6	chr19	11648364	11652877	+	0.765058	-0.56721	24.4904	7.46823e-07	7.49472e-06
RP11-1275H24.3	chr7	5428731	5429672	+	0.810053	-0.402866	24.4873	7.48007e-07	7.50388e-06
CTSA	chr20	45890144	45898820	+	0.602573	8.23553	24.4508	7.62303e-07	7.63901e-06
PLEKHN1	chr1	966497	975865	+	0.978135	2.1456	24.4331	7.69362e-07	7.7014e-06
PCSK9	chr1	55039548	55064852	+	1.47837	4.76678	24.4196	7.74779e-07	7.74444e-06
RP5-963E22.6	chr20	63218041	63218502	+	1.05154	-2.72453	24.4036	7.81218e-07	7.80036e-06
DSP	chr6	7541575	7586717	+	0.76252	8.68607	24.3937	7.85271e-07	7.83659e-06
HOOK1	chr1	59814786	59876378	+	0.756854	5.22291	24.3865	7.88204e-07	7.86163e-06
RP11-649A18.12	chr17	75271369	75273895	+	0.675923	0.709838	24.3284	8.12342e-07	8.09365e-06
KIF23	chr15	69414246	69448427	+	0.686194	4.70823	24.301	8.23969e-07	8.20359e-06
MCM8	chr20	5950652	5998977	+	0.586851	4.61196	24.2629	8.40419e-07	8.3285e-06
TRIM80P	chr17	75074306	75079549	+	1.15705	-2.5047	24.2283	8.55678e-07	8.4676e-06
DLX6	chr7	97005548	97011039	+	2.32594	0.38843	24.1941	8.70988e-07	8.61297e-06
HES2	chr1	6412418	6424670	-	1.48808	2.08872	24.1542	8.89242e-07	8.77783e-06
LDLR	chr19	11089362	11133816	+	0.748397	7.11779	24.1484	8.91919e-07	8.79886e-06
DLX4	chr17	49968970	49974959	+	1.70501	0.814279	24.1399	8.95844e-07	8.83041e-06
RP5-881L22.5	chr20	44347552	44355185	-	1.40428	0.0345262	24.0513	9.38048e-07	9.20063e-06
SLC1A5	chr19	46774883	46788594	-	0.832578	7.36565	24.0465	9.40368e-07	9.21687e-06
GEMIN8P4	chr1	89993593	89994321	-	0.749264	-1.25651	24.0064	9.60162e-07	9.40091e-06
KPNA2	chr17	68035519	68046842	+	0.600875	6.90196	23.9825	9.7214e-07	9.51147e-06
ACAT2	chr6	159760328	159779055	+	0.662267	4.1438	23.9796	9.73621e-07	9.52259e-06
SATB2	chr2	199269500	199471266	-	0.989577	3.58185	23.9771	9.74868e-07	9.53143e-06
ATP6V1B1	chr2	70935882	70965406	+	1.76545	0.146231	23.9355	9.96175e-07	9.72261e-06
RP11-449P15.2	chr7	879790	886547	-	0.857177	3.1873	23.8891	1.02047e-06	9.92824e-06
RP11-700P18.1	chr7	56288230	56291425	+	1.02324	-2.47208	23.8881	1.021e-06	9.92992e-06
CCT6P2	chr5	14639426	14641018	-	1.49475	-3.6786	23.8871	1.02152e-06	9.93065e-06
HSPD1	chr2	197486581	197516737	-	0.592552	8.46625	23.878	1.02637e-06	9.96817e-06
ZAR1	chr4	48490252	48494389	+	2.62433	-3.59838	23.8659	1.03286e-06	1.00242e-05
MYO18B	chr22	25742144	26031041	+	2.50979	0.583523	23.8575	1.03734e-06	1.00536e-05
CELSR3	chr3	48636469	48662915	-	1.03049	4.40549	23.8403	1.04666e-06	1.01337e-05
WDR90	chr16	649311	667833	+	0.611119	5.05241	23.813	1.06162e-06	1.02603e-05
RBBP8NL	chr20	62410237	62427533	-	1.17377	2.5145	23.7866	1.0763e-06	1.03912e-05
EGFR-AS1	chr7	55179750	55188934	-	1.7479	-0.441472	23.7626	1.0898e-06	1.05033e-05
DNAH10	chr12	123762188	123936206	+	1.02242	-0.0449905	23.7553	1.09392e-06	1.05357e-05
HSP90AB3P	chr4	87891843	87894015	+	0.713215	0.408796	23.6541	1.15299e-06	1.1047e-05
FOXD2	chr1	47436017	47440691	+	0.89314	2.86841	23.6483	1.15649e-06	1.10768e-05
CENPF	chr1	214603195	214664588	+	0.750458	6.41592	23.6406	1.16111e-06	1.11171e-05
HJURP	chr2	233833416	233854566	-	0.713543	4.11567	23.6001	1.18579e-06	1.13299e-05
UPK1A	chr19	35666516	35678483	+	2.47536	-0.662456	23.5777	1.19969e-06	1.14392e-05
AXIN2	chr17	65528563	65561647	-	1.43421	5.6119	23.5581	1.212e-06	1.15358e-05
DLX3	chr17	49990005	49995224	-	3.17318	1.12593	23.5576	1.21232e-06	1.15358e-05
RP11-31F19.1	chr9	547317	549531	+	1.38839	-1.4756	23.4908	1.25511e-06	1.19102e-05
FOXD2-AS1	chr1	47432133	47434641	-	0.786181	2.46752	23.4889	1.2564e-06	1.19143e-05
RP11-20B7.1	chr3	73808601	73902866	+	2.53524	-2.58075	23.4552	1.27854e-06	1.21036e-05
RP11-353N14.5	chr17	79915252	79926725	-	1.08981	0.322743	23.4386	1.28965e-06	1.22004e-05
AATF	chr17	36948875	37056871	+	0.669654	6.06301	23.361	1.34271e-06	1.26707e-05
CDH16	chr16	66908122	66918984	-	2.17314	1.8409	23.2709	1.40717e-06	1.32309e-05
NDC80	chr18	2571511	2616635	+	0.658561	3.78132	23.2479	1.42409e-06	1.33723e-05
C20orf85	chr20	58150904	58161150	+	3.96205	-2.61455	23.1896	1.46792e-06	1.37323e-05
OCLN	chr5	69492292	69558104	+	0.672622	6.23087	23.1423	1.50443e-06	1.40407e-05
TRIM71	chr3	32818018	32897826	+	2.92708	0.451379	23.1202	1.52181e-06	1.41885e-05
RP11-480I12.9	chr1	202873294	202874326	+	1.32116	-1.21014	23.1031	1.53543e-06	1.43059e-05
TNFRSF25	chr1	6461151	6466195	-	0.765603	3.29725	23.0907	1.54538e-06	1.4389e-05
DDIAS	chr11	82899975	82958277	+	0.716983	3.24385	23.0765	1.55682e-06	1.4476e-05
TNNC1	chr3	52451102	52454070	-	1.45248	1.38459	23.0498	1.57858e-06	1.46341e-05
SLC16A13	chr17	7036075	7040121	+	0.671365	2.62341	23.0435	1.58378e-06	1.46726e-05
AK7	chr14	96392111	96489427	+	0.928343	1.76121	23.0345	1.59124e-06	1.47318e-05
CLDN4	chr7	73799542	73832693	+	0.864779	8.55555	22.9871	1.63096e-06	1.50593e-05
IDI1	chr10	1039908	1049170	-	0.584917	5.50952	22.9814	1.63575e-06	1.50986e-05
ZNF750	chr17	82829435	82840578	-	2.04772	1.96943	22.9786	1.63814e-06	1.51057e-05
LINC01123	chr2	109987063	109996140	+	0.716139	3.48744	22.9693	1.64607e-06	1.51585e-05
TEX101	chr19	43401496	43418597	+	2.7993	-2.27092	22.9456	1.66655e-06	1.53315e-05
LINC00511	chr17	72323123	72640472	-	0.825664	4.19541	22.9423	1.66939e-06	1.53478e-05
FAM60A	chr12	31280584	31327058	-	0.582363	6.24077	22.9291	1.68084e-06	1.54479e-05
RACGAP1	chr12	49976923	50033136	-	0.58257	5.56519	22.9123	1.69565e-06	1.55582e-05
CCNO	chr5	55231152	55233680	-	0.933429	2.45528	22.8847	1.72012e-06	1.57463e-05
SLC12A7	chr5	1050376	1112035	-	0.610094	7.2191	22.8583	1.74397e-06	1.59541e-05
URAD	chr13	27977714	27988654	-	4.59569	-1.35388	22.8363	1.76404e-06	1.61008e-05
HMGCR	chr5	75336329	75362104	+	0.591178	5.64638	22.8312	1.76868e-06	1.6134e-05
PPP1R1B	chr17	39626740	39636626	+	1.80763	7.76558	22.8075	1.79068e-06	1.63168e-05
DDR1	chr6	30876421	30900156	+	0.645835	8.09139	22.8045	1.79347e-06	1.63369e-05
MLXIPL	chr7	73593194	73624543	-	1.58543	4.24308	22.7849	1.8118e-06	1.64822e-05
ISM2	chr14	77474394	77498850	-	2.72389	-0.734394	22.7723	1.82376e-06	1.65792e-05
SCDP1	chr17	20784645	20785725	+	1.34073	-3.73432	22.7404	1.85424e-06	1.68241e-05
DLX6-AS1	chr7	96955141	97014065	-	2.08706	0.465508	22.7225	1.87167e-06	1.69656e-05
AP001469.9	chr21	46251549	46254133	-	0.626776	0.111061	22.7028	1.89094e-06	1.71234e-05
RP11-394A14.2	chr13	63828840	63844125	-	3.02881	-3.54056	22.6998	1.89384e-06	1.71441e-05
COL11A2	chr6	33162681	33192499	-	2.01439	2.88008	22.6488	1.94482e-06	1.75712e-05
RP11-22C11.2	chr8	94637285	94639467	-	0.789881	0.770628	22.6041	1.99061e-06	1.79439e-05
KDF1	chr1	26949562	26960406	-	0.633342	3.98412	22.5842	2.01133e-06	1.8113e-05
C17orf104	chr17	44656404	44690308	+	1.13233	-0.66089	22.5792	2.0166e-06	1.81546e-05
GRTP1	chr13	113324164	113364148	-	0.636144	4.22089	22.5489	2.04862e-06	1.83773e-05
LHFPL3	chr7	104328656	104907232	+	1.94174	0.0803394	22.5275	2.07155e-06	1.85649e-05
KIF4A	chrX	70290090	70420832	+	0.687749	4.51407	22.4943	2.10769e-06	1.88401e-05
RP11-66N24.6	chr14	23619201	23620012	+	1.42413	-1.79328	22.4822	2.12102e-06	1.89461e-05
RP11-749I16.3	chr17	40113215	40115442	-	1.18574	-2.70111	22.4763	2.12754e-06	1.8993e-05
EME1	chr17	50373220	50381483	+	0.60668	2.13129	22.4757	2.12822e-06	1.8993e-05
RAB25	chr1	156061160	156070514	+	0.656503	6.69044	22.4352	2.17353e-06	1.93475e-05
KIF14	chr1	200551497	200620734	-	0.705184	3.78084	22.4306	2.17872e-06	1.93813e-05
CTA-228A9.3	chr22	38090127	38091559	+	0.790721	0.461453	22.4013	2.21224e-06	1.9648e-05
SGOL2	chr2	200510008	200583782	+	0.619989	3.60965	22.3787	2.23848e-06	1.9862e-05
POFUT1	chr20	32207880	32238667	+	0.585999	6.63532	22.3603	2.25996e-06	2.00333e-05
KLC4	chr6	43040777	43075099	+	0.679492	4.8523	22.3466	2.27613e-06	2.01638e-05
GABRB2	chr5	161288429	161549044	-	1.95373	0.936795	22.3387	2.28555e-06	2.02343e-05
NRCAM	chr7	108147623	108456717	-	1.44438	3.78323	22.3363	2.28838e-06	2.02529e-05
BUB1	chr2	110637698	110678114	-	0.664075	5.11333	22.3157	2.3131e-06	2.0452e-05
MAGEC2	chrX	142202345	142205290	-	6.88614	1.66625	22.312	2.31751e-06	2.04845e-05
CEP72	chr5	612272	667168	+	0.760374	3.01208	22.3101	2.31986e-06	2.04987e-05
CA6	chr1	8945867	8975092	+	4.46995	0.0505513	22.2846	2.3509e-06	2.07505e-05
MST1	chr3	49683947	49689501	-	0.913421	2.56612	22.2756	2.36186e-06	2.08366e-05
ANKRD34B	chr5	80556755	80570488	-	2.84046	-1.97265	22.2542	2.3884e-06	2.10534e-05
GGH	chr8	63015079	63039171	-	1.06133	5.30325	22.251	2.39237e-06	2.1079e-05
RP11-547D24.1	chr1	2013213	2015530	-	1.15029	-2.02307	22.222	2.42869e-06	2.13922e-05
GBX2	chr2	236165236	236168369	-	2.28543	-1.65007	22.217	2.43511e-06	2.14419e-05
ERVMER34-1	chr4	52722618	52751640	-	1.59664	2.37996	22.1933	2.46535e-06	2.16875e-05
SVOPL	chr7	138594285	138701352	-	1.81577	-1.59861	22.188	2.47218e-06	2.17339e-05
SLC22A11	chr11	64555626	64572875	+	2.51984	-0.279351	22.183	2.47859e-06	2.17833e-05
ABCB6	chr2	219209768	219218990	-	0.721057	4.39987	22.094	2.59623e-06	2.27451e-05
RP11-525K10.3	chr16	80155053	80563135	-	2.04169	-2.33037	22.0905	2.60096e-06	2.27794e-05
AC007255.8	chr7	29514225	29563670	-	0.735605	0.660181	22.0508	2.65527e-06	2.31921e-05
SLC22A9	chr11	63369789	63410294	+	2.26462	-2.98406	22.0106	2.7115e-06	2.36578e-05
EXPH5	chr11	108505431	108593738	-	0.790313	4.26937	21.9959	2.73237e-06	2.38174e-05
BRDT	chr1	91949371	92014426	+	3.30688	-1.78642	21.9645	2.77745e-06	2.418e-05
C2orf82	chr2	232857270	232878708	+	1.17503	3.01446	21.9549	2.7914e-06	2.42786e-05
FOXE3	chr1	47416072	47418052	+	1.51374	-1.69108	21.9514	2.79641e-06	2.43069e-05
RP11-368I7.4	chr16	89682620	89686569	-	0.755089	-2.17609	21.9351	2.82026e-06	2.44835e-05
BMP7	chr20	57168748	57266629	-	1.72872	4.14668	21.9198	2.84293e-06	2.46648e-05
MLLT4-AS1	chr6	167823876	167826709	-	0.960861	-0.236642	21.8954	2.87925e-06	2.49722e-05
BOP1	chr8	144262102	144291370	-	0.600676	5.87888	21.8575	2.93663e-06	2.543e-05
ANLN	chr7	36389806	36453791	+	0.668561	5.94777	21.808	3.01344e-06	2.60626e-05
RP5-875O13.7	chr1	16681097	16688749	-	1.88662	-2.45857	21.7853	3.0492e-06	2.63062e-05
MPZL3	chr11	118226690	118252350	-	0.644309	3.67975	21.7836	3.05203e-06	2.63225e-05
ACLY	chr17	41866908	41930542	-	0.736552	7.4684	21.7677	3.07742e-06	2.65085e-05
RP11-9E17.1	chr18	26542971	26545791	-	0.722761	1.65766	21.7484	3.10845e-06	2.67508e-05
SGOL1	chr3	20160593	20186292	-	0.632341	3.35903	21.7476	3.10984e-06	2.67545e-05
PRR19	chr19	42302098	42310821	+	1.01079	1.01497	21.6923	3.20073e-06	2.74682e-05
KIF18A	chr11	28020620	28108308	-	0.682005	3.49382	21.6903	3.20403e-06	2.74813e-05
TM4SF1-AS1	chr3	149377778	149386583	+	1.21984	-1.4035	21.6902	3.20424e-06	2.74813e-05
RP11-121C6.5	chr12	56411944	56413190	-	1.12957	-3.28805	21.6757	3.22849e-06	2.76347e-05
RP5-908M14.9	chr20	62386303	62386970	-	0.700966	0.398136	21.665	3.24653e-06	2.77753e-05
THEM6	chr8	142727203	142736927	+	0.649415	6.22859	21.6496	3.27281e-06	2.7957e-05
RP11-351J23.2	chr6	167666840	167679270	-	1.74624	-2.01713	21.6345	3.29872e-06	2.81523e-05
ERVV-2	chr19	53044738	53051076	+	3.06063	-2.43546	21.5873	3.38087e-06	2.88091e-05
LINC00501	chr3	177294442	177323418	+	1.36749	-1.18596	21.5865	3.3823e-06	2.88124e-05
SLC5A6	chr2	27199587	27212958	-	0.591759	5.65232	21.5804	3.393e-06	2.88729e-05
LY6G6D	chr6	31715356	31717804	+	4.60748	-1.22613	21.5643	3.42161e-06	2.90758e-05
FGFR4	chr5	177086886	177098144	+	0.972495	6.10684	21.5547	3.43874e-06	2.92124e-05
NPAS2	chr2	100820152	100996829	+	0.604532	6.1172	21.5012	3.536e-06	2.99744e-05
RP11-35N6.1	chr9	101028709	101325135	+	1.89	-0.856908	21.4964	3.54503e-06	3.00239e-05
RP11-496I9.1	chr11	557595	560107	+	1.05057	0.717377	21.4642	3.60495e-06	3.04936e-05
RP5-1125A11.7	chr20	33985617	33988989	-	0.726082	0.740826	21.4603	3.61227e-06	3.05462e-05
ZDHHC8P1	chr22	23390606	23402726	-	1.76053	0.732955	21.4559	3.62061e-06	3.06074e-05
PERM1	chr1	975204	982093	-	0.879535	0.213233	21.4359	3.65855e-06	3.09187e-05
MEX3A	chr1	156072013	156081998	-	1.12236	3.28391	21.4221	3.685e-06	3.11233e-05
RP11-141J13.5	chr17	4610449	4617650	+	2.24261	-0.7769	21.3997	3.72838e-06	3.14801e-05
NAPRT	chr8	143574785	143578649	-	0.70508	6.45201	21.3715	3.78346e-06	3.19257e-05
LINC01300	chr8	141340549	141344621	+	3.13156	-1.01228	21.345	3.83617e-06	3.23409e-05
CH507-254M2.3	chr21	6721812	6725209	+	0.756	-0.0782317	21.311	3.90477e-06	3.28693e-05
RP11-495P10.8	chr1	148290890	148295859	-	2.53162	-0.606299	21.2949	3.93769e-06	3.31364e-05
CRACR2B	chr11	826144	831991	+	0.739419	4.9306	21.2928	3.94217e-06	3.3164e-05
NXF2	chrX	102247161	102326719	+	6.10991	0.267594	21.2742	3.98063e-06	3.34469e-05
MAGEA8	chrX	149881141	149885835	+	2.91808	-0.649752	21.2674	3.99471e-06	3.35347e-05
AGXT	chr2	240868479	240880502	+	1.66701	-1.24688	21.2611	4.00782e-06	3.36143e-05
DNAH2	chr17	7717354	7833744	+	1.39451	1.81389	21.2323	4.06848e-06	3.40921e-05
FAM64A	chr17	6444415	6451469	+	0.771279	2.66712	21.1744	4.19326e-06	3.50424e-05
ANO9	chr11	417933	442011	-	0.784924	5.14166	21.1644	4.21522e-06	3.52047e-05
GPX2	chr14	64939152	64942905	-	0.997932	8.53701	21.1248	4.30328e-06	3.58646e-05
MAGEC1	chrX	141903894	141909388	+	5.69179	1.72845	21.0611	4.44868e-06	3.69431e-05
RP3-512B11.3	chr6	7540451	7541338	-	0.929662	-0.870055	21.0416	4.49415e-06	3.7276e-05
VWCE	chr11	61258286	61295424	-	1.2689	0.522783	21.0188	4.5481e-06	3.76447e-05
NPIPB8	chr16	28637654	28658682	+	1.0589	-2.69282	21.0126	4.56279e-06	3.7755e-05
C17orf96	chr17	38671703	38675421	-	0.932688	3.28477	21.0054	4.58e-06	3.78785e-05
HAPLN2	chr1	156619294	156625725	+	1.40336	-2.86721	20.9939	4.60757e-06	3.80801e-05
BMS1P22	chr22	15805263	15820884	-	1.48178	-1.34998	20.991	4.61455e-06	3.81264e-05
GRHL1	chr2	9951693	10002277	+	0.893492	3.35914	20.9344	4.7528e-06	3.91753e-05
SRCIN1	chr17	38530016	38605930	-	1.20131	3.59055	20.8783	4.8942e-06	4.02331e-05
ADAP1	chr7	897901	955407	-	0.670315	6.237	20.869	4.9179e-06	4.03801e-05
RP11-451G4.2	chr3	155290229	155293775	-	2.33992	-3.18624	20.8644	4.9297e-06	4.04411e-05
ZC3H12A	chr1	37474552	37484379	+	0.876483	5.76279	20.8471	4.97453e-06	4.07815e-05
AC017074.2	chr2	113677702	113704078	-	1.16814	-2.25813	20.8465	4.97611e-06	4.07815e-05
FKBP9P1	chr7	55681074	55713252	-	1.13689	1.49151	20.8302	5.01865e-06	4.1081e-05
PVRL2	chr19	44846175	44889228	+	0.609493	7.58534	20.8221	5.03989e-06	4.12352e-05
ASPM	chr1	197084128	197146694	-	0.666598	5.26843	20.7716	5.17436e-06	4.21365e-05
NXF2B	chrX	102360395	102463274	-	5.75446	0.360427	20.7695	5.18005e-06	4.21686e-05
SLC6A4	chr17	30194319	30236002	-	1.44465	-0.258262	20.7667	5.18783e-06	4.22089e-05
RP11-122M14.1	chr1	211675762	211690103	+	1.35679	-3.61439	20.7639	5.19526e-06	4.2257e-05
ASGR1	chr17	7173431	7179564	-	1.21131	0.849475	20.7613	5.20243e-06	4.22905e-05
CDC25B	chr20	3786772	3806121	+	0.676766	6.77718	20.7425	5.25368e-06	4.26946e-05
FAM72A	chr1	206186179	206204414	-	0.685236	2.45731	20.7377	5.26698e-06	4.27776e-05
PTPRO	chr12	15322397	15597399	+	1.50191	3.16626	20.6992	5.3738e-06	4.35686e-05
AL589743.1	chr14	19300177	19302924	-	1.18355	2.67724	20.6946	5.3867e-06	4.36605e-05
FAM83H-AS1	chr8	143734140	143746337	+	0.819226	4.92679	20.6644	5.47232e-06	4.42639e-05
KIF15	chr3	44761717	44873376	+	0.666352	3.71347	20.6517	5.50893e-06	4.45287e-05
RP11-7K24.3	chr6	42092233	42094259	-	1.1152	1.86943	20.6513	5.50988e-06	4.45287e-05
PSPH	chr7	56011051	56051604	-	0.616854	3.62002	20.6373	5.5504e-06	4.48291e-05
RP11-129M6.1	chr14	40954898	40975877	+	2.66007	-4.01056	20.6104	5.62898e-06	4.53854e-05
AC112229.1	chr2	110360608	110363737	-	1.09872	1.10234	20.6075	5.63735e-06	4.54397e-05
C1orf53	chr1	197902647	197907367	+	0.653997	0.470827	20.5974	5.66723e-06	4.56275e-05
OPLAH	chr8	144051266	144063832	-	0.755841	5.39714	20.587	5.69829e-06	4.58376e-05
LINC00449	chr13	99499727	99501052	-	0.781061	-2.51687	20.5726	5.74126e-06	4.61565e-05
UBBP4	chr17	22202995	22205154	+	1.23699	-0.576873	20.5684	5.75367e-06	4.62428e-05
DLGAP5	chr14	55148112	55191678	-	0.653362	4.39088	20.5561	5.79081e-06	4.65278e-05
PASD1	chrX	151563622	151676739	+	6.82814	0.0855606	20.545	5.82454e-06	4.67717e-05
FBN3	chr19	8065402	8149846	-	2.5397	-0.461895	20.5291	5.87319e-06	4.7067e-05
AC090505.6	chr3	194708421	194782168	+	1.24361	-3.53966	20.5058	5.94499e-06	4.76011e-05
ZNF165	chr6	28080975	28089563	+	0.621105	2.2313	20.479	6.02877e-06	4.82302e-05
SNORA71B	chr20	38425083	38425354	-	0.798131	-2.69131	20.4741	6.04424e-06	4.834e-05
MAFG-AS1	chr17	81927829	81930753	+	0.77562	1.83258	20.4498	6.12158e-06	4.8888e-05
KNG1	chr3	186717276	186743954	+	1.83326	-1.65874	20.4417	6.14757e-06	4.90721e-05
EBP	chrX	48521158	48528716	+	0.589498	4.87296	20.4288	6.18909e-06	4.93561e-05
BOLL	chr2	197726879	197786762	-	1.60968	-2.63228	20.4243	6.20361e-06	4.94577e-05
SLC34A2	chr4	25655301	25678748	+	2.18056	4.19522	20.3925	6.30755e-06	5.0243e-05
STK4-AS1	chr20	44963794	44966402	-	0.769749	-1.84531	20.3838	6.33623e-06	5.04424e-05
SLCO1A2	chr12	21264600	21419594	-	2.00118	-0.942333	20.3666	6.39344e-06	5.08541e-05
C9orf173	chr9	137251261	137253483	+	1.20959	-2.31887	20.3511	6.44548e-06	5.12386e-05
RP11-172H24.4	chr13	20699307	20703718	-	0.766622	2.09845	20.3488	6.4533e-06	5.12861e-05
SMARCE1	chr17	40624962	40648508	-	0.660003	6.77839	20.3469	6.45984e-06	5.13086e-05
PLA2G4D	chr15	42067009	42094554	-	1.53692	-0.799238	20.3417	6.47746e-06	5.14338e-05
MROH6	chr8	143566187	143572971	-	0.945898	5.40207	20.3404	6.4816e-06	5.14381e-05
LINC01419	chr8	83403758	83408900	+	3.72166	-1.51507	20.3224	6.54296e-06	5.18204e-05
NXPH4	chr12	57216795	57226449	+	1.68976	2.51767	20.3196	6.55252e-06	5.18517e-05
MROH2A	chr2	233775679	233833423	+	2.57931	-1.48763	20.3058	6.60003e-06	5.21383e-05
AC090505.5	chr3	194755589	194757422	+	1.52866	-3.44479	20.3018	6.614e-06	5.22189e-05
TLCD1	chr17	28724348	28727935	-	0.729121	3.42949	20.2869	6.66555e-06	5.2596e-05
CTA-363E6.6	chr16	19476916	19487899	-	0.943965	-0.961945	20.2702	6.72393e-06	5.29964e-05
RP11-276H7.2	chr1	16155211	16157329	+	0.74484	-0.515479	20.2682	6.73095e-06	5.30366e-05
OTOP2	chr17	74924275	74933912	+	1.94249	-3.35355	20.2668	6.73593e-06	5.30608e-05
AC092198.1	chrX	40009276	40012182	+	2.19289	-1.18152	20.2489	6.7994e-06	5.35e-05
RP11-480I12.7	chr1	202861754	202875241	+	0.981874	-0.523783	20.2462	6.80881e-06	5.35476e-05
ROS1	chr6	117288300	117425855	-	2.03632	0.648763	20.2426	6.82167e-06	5.36227e-05
POC1A	chr3	52075253	52154690	-	0.594669	3.32618	20.2423	6.82274e-06	5.36227e-05
GAS2L3	chr12	100573683	100628286	+	0.648704	3.59566	20.2212	6.89858e-06	5.4142e-05
SEMG1	chr20	45206997	45209772	+	2.4112	0.745028	20.1983	6.98163e-06	5.47009e-05
C2-AS1	chr6	31934474	31941724	-	1.2916	-3.59911	20.1893	7.01437e-06	5.48954e-05
CYP2D7	chr22	42140203	42144577	-	0.710238	-0.0707693	20.1843	7.03269e-06	5.50233e-05
AC073869.20	chr2	131442644	131444587	-	1.10154	-1.78608	20.1632	7.1108e-06	5.55717e-05
C10orf91	chr10	132444327	132449408	+	1.3776	-0.114742	20.1591	7.12611e-06	5.56756e-05
OVOL1	chr11	65787022	65797219	+	1.04626	4.26305	20.1507	7.1573e-06	5.58961e-05
ANKRD26P1	chr16	46469341	46569097	-	2.87862	-2.37699	20.1499	7.16038e-06	5.58961e-05
AC018890.6	chr2	174547141	174774827	+	2.24674	-1.45921	20.1391	7.20095e-06	5.61654e-05
FOXA2	chr20	22581005	22585455	-	1.11999	4.88705	20.1284	7.2412e-06	5.64475e-05
BAMBI	chr10	28677342	28682939	+	1.52678	4.58222	20.1202	7.27256e-06	5.66602e-05
ARID3A	chr19	925781	975934	+	0.983343	4.72359	20.1179	7.28105e-06	5.67104e-05
RP11-1260E13.2	chr17	352638	357581	+	1.0044	-1.84371	20.0841	7.41112e-06	5.75941e-05
MT3	chr16	56589074	56591088	+	1.9633	-2.39049	20.0659	7.48177e-06	5.8078e-05
ASL	chr7	66075798	66093558	+	0.626659	5.66301	20.0539	7.52915e-06	5.83809e-05
FOXN1	chr17	28506243	28538896	+	2.02937	-0.69124	20.0538	7.52921e-06	5.83809e-05
CEBPA-AS1	chr19	33302857	33305054	+	0.953798	1.81474	20.0428	7.57279e-06	5.8686e-05
TGM5	chr15	43232595	43266857	-	2.82796	-1.85158	20.0262	7.6389e-06	5.91233e-05
SLC17A9	chr20	62952647	62969585	+	0.932918	5.27967	20.0254	7.64202e-06	5.91233e-05
RBM46	chr4	154781213	154828813	+	3.28026	-1.54159	20.0203	7.66261e-06	5.9266e-05
ST7-OT4	chr7	116953899	117098806	+	0.964901	-2.13797	20.0187	7.66876e-06	5.92834e-05
MRPS35	chr12	27710773	27756295	+	0.614378	6.23362	20.0048	7.7246e-06	5.9679e-05
RP11-216L13.19	chr9	136799223	136810042	+	0.769981	0.664601	19.9762	7.84109e-06	6.04442e-05
LRRC56	chr11	537527	554916	+	0.860796	1.919	19.9314	8.02715e-06	6.17412e-05
HERC2P8	chr16	33094204	33129090	-	1.61854	-1.60398	19.9075	8.12818e-06	6.23798e-05
RP11-478J18.2	chr1	213983793	213986419	-	1.97056	-2.10273	19.8981	8.16824e-06	6.26179e-05
TMEM125	chr1	43269994	43274002	+	0.693796	4.09283	19.8924	8.1924e-06	6.27793e-05
RP11-49I11.4	chr18	36189824	36190272	+	0.686463	-1.54281	19.8722	8.27968e-06	6.33671e-05
RP13-582O9.7	chr8	143290399	143290621	-	0.866929	-2.67301	19.8591	8.3367e-06	6.37507e-05
CDC25C	chr5	138285265	138338355	-	0.650101	2.63023	19.8372	8.43258e-06	6.44417e-05
PLEKHG5	chr1	6466092	6520061	-	0.60751	4.54418	19.8369	8.43403e-06	6.44417e-05
TAF7L	chrX	101268253	101293057	-	1.76707	-2.0066	19.8347	8.44365e-06	6.44797e-05
CTD-2517M22.14	chr8	144495458	144505444	-	0.735353	1.24848	19.8193	8.51195e-06	6.49475e-05
RTEL1-TNFRSF6B	chr20	63659300	63698698	+	0.657925	4.2496	19.8151	8.53051e-06	6.50713e-05
PAGE2	chrX	55089008	55092842	+	7.73807	0.47022	19.8065	8.56922e-06	6.53306e-05
AURKB	chr17	8204733	8210600	-	0.659592	4.19233	19.7893	8.64637e-06	6.58102e-05
SEMA4G	chr10	100969518	100985871	+	0.768889	6.0757	19.7659	8.75305e-06	6.65491e-05
PAH	chr12	102836885	102958410	-	2.47794	0.330922	19.7613	8.77403e-06	6.6682e-05
C1orf226	chr1	162366908	162386818	+	0.587363	4.4484	19.7321	8.90918e-06	6.76619e-05
TSPEAR-AS2	chr21	44517216	44525952	+	1.23363	1.09732	19.7298	8.92008e-06	6.77262e-05
LRRC36	chr16	67326798	67385203	+	0.999369	-0.556233	19.7252	8.94143e-06	6.78697e-05
NAA11	chr4	79225694	79326050	-	4.94559	-0.931316	19.7206	8.96322e-06	6.79978e-05
TFRC	chr3	196027183	196082189	-	0.712757	7.6605	19.7183	8.97364e-06	6.80583e-05
RP11-60L3.1	chr15	74202705	74221557	+	1.67652	-2.02449	19.7008	9.0562e-06	6.86347e-05
LRRC73	chr6	43506969	43510686	-	0.93296	0.97214	19.7006	9.05706e-06	6.86347e-05
IGDCC3	chr15	65327127	65378040	-	2.45969	0.0672769	19.669	9.20847e-06	6.97249e-05
RP11-394I13.2	chr2	173968351	173969418	+	0.885363	-1.5192	19.6451	9.32411e-06	7.04082e-05
LZTS3	chr20	3162617	3173592	-	0.894355	5.38987	19.6386	9.35576e-06	7.06138e-05
ALDH4A1	chr1	18871430	18902781	-	0.644359	4.30878	19.6372	9.36293e-06	7.06138e-05
NR6A1	chr9	124517275	124771310	-	0.723894	2.55907	19.6371	9.36339e-06	7.06138e-05
BCAR4	chr16	11819829	11828845	-	4.23434	-1.17162	19.6339	9.37918e-06	7.06893e-05
ILDR1	chr3	121987323	122022204	-	0.743863	3.24531	19.6304	9.39628e-06	7.07989e-05
GINS1	chr20	25407727	25452628	+	0.628573	4.04057	19.6273	9.41154e-06	7.08946e-05
C19orf84	chr19	51388289	51390574	-	1.43466	-1.25279	19.6125	9.48453e-06	7.1425e-05
MYBPHL	chr1	109292365	109307041	-	2.56796	-1.22876	19.6064	9.51477e-06	7.16333e-05
LL22NC03-N14H11.1	chr22	15823197	15823890	+	1.09617	0.448195	19.5952	9.57081e-06	7.20357e-05
HIST2H2BD	chr1	149843041	149843533	+	0.74285	0.378978	19.5916	9.58905e-06	7.21477e-05
CTD-3065J16.9	chr8	144078002	144079265	-	0.587461	0.122351	19.5846	9.62421e-06	7.2359e-05
GALE	chr1	23795599	23800804	-	0.652864	5.70054	19.4685	1.02273e-05	7.66027e-05
GPRC5C	chr17	74424851	74451653	+	0.774759	5.52831	19.4579	1.02843e-05	7.69877e-05
MET	chr7	116672390	116798386	+	0.912443	7.35678	19.4558	1.02955e-05	7.70303e-05
ERBB3	chr12	56079857	56103505	+	0.621553	8.11897	19.4407	1.03772e-05	7.76204e-05
RP11-109L13.1	chr11	117135528	117138582	+	1.0731	-1.79313	19.4372	1.03962e-05	7.77207e-05
VNN3	chr6	132722787	132734765	-	1.54535	0.486616	19.4331	1.04185e-05	7.78664e-05
TCP10	chr6	167357031	167384510	-	2.13119	-1.48955	19.4325	1.04221e-05	7.78722e-05
RP11-443B7.1	chr1	234957342	234970062	-	0.916506	-0.360236	19.4289	1.04413e-05	7.79524e-05
ZFPM1	chr16	88453317	88537016	+	0.659184	5.79027	19.4194	1.04934e-05	7.82995e-05
TRIM10	chr6	30151945	30160934	-	0.850873	1.04727	19.4061	1.05671e-05	7.87855e-05
HK2	chr2	74833981	74893359	+	0.824234	6.21069	19.3934	1.06376e-05	7.92004e-05
STRC	chr15	43599398	43618800	-	1.07614	-0.447687	19.3803	1.07107e-05	7.96421e-05
CTB-25B13.9	chr19	1508375	1508963	+	1.00181	-3.21259	19.3042	1.11461e-05	8.26586e-05
CDCA7	chr2	173354820	173368997	+	0.785863	5.92556	19.2929	1.12123e-05	8.30825e-05
FGFRL1	chr4	1009936	1026897	+	0.804779	5.80471	19.2929	1.12123e-05	8.30825e-05
RP11-817J15.2	chr11	102606916	102628070	+	2.38528	-2.70377	19.2892	1.12337e-05	8.31967e-05
MELK	chr9	36572862	36677683	+	0.641645	4.53429	19.2289	1.15945e-05	8.55945e-05
MARC1	chr1	220786759	220819657	+	0.728218	3.74022	19.1852	1.18632e-05	8.74385e-05
ETV4	chr17	43527844	43579620	-	0.9794	5.31579	19.1707	1.19532e-05	8.80312e-05
RP11-750B16.1	chr17	53105734	53106358	+	1.74256	-1.43595	19.1597	1.20222e-05	8.84498e-05
GALR3	chr22	37823382	37825495	+	1.47528	-3.42013	19.1597	1.20228e-05	8.84498e-05
KIF2C	chr1	44739818	44767767	+	0.620423	4.7801	19.1484	1.20936e-05	8.89236e-05
CTB-147N14.6	chr19	46787815	46789043	+	0.805727	-0.520952	19.1426	1.21307e-05	8.91489e-05
SERPIND1	chr22	20773879	20787720	+	1.56332	-0.0973958	19.1356	1.21754e-05	8.94302e-05
CCDC24	chr1	43991359	43996528	+	0.614311	2.98481	19.1322	1.2197e-05	8.9565e-05
RP13-467H17.1	chr8	142403652	142407028	+	1.08189	-2.80685	19.1102	1.23387e-05	9.04858e-05
C1orf106	chr1	200891048	200915735	+	0.659149	7.23456	19.1091	1.23453e-05	9.05108e-05
SOX9-AS1	chr17	72034107	72237203	-	0.960768	-0.368242	19.0747	1.25702e-05	9.2013e-05
HIST2H3C	chr1	149839538	149841193	-	0.963187	0.197068	19.0621	1.26531e-05	9.25225e-05
HIST2H3A	chr1	149852619	149854274	+	0.963187	0.197068	19.0621	1.26531e-05	9.25225e-05
HSF2BP	chr21	43529192	43659493	-	0.779418	-0.340512	19.0408	1.27952e-05	9.33402e-05
BAIAP2L1	chr7	98291651	98401068	-	0.693197	6.80998	19.0087	1.30127e-05	9.48267e-05
DCXR	chr17	82035136	82037732	-	0.601264	5.5368	19.0038	1.30455e-05	9.50411e-05
RP11-27G14.4	chr1	201399633	201401190	+	0.708264	0.672839	18.9966	1.3095e-05	9.53516e-05
TMEM97	chr17	28319095	28328685	+	0.621152	6.00104	18.9922	1.31257e-05	9.555e-05
R3HDML	chr20	44336986	44351235	+	1.77701	-3.17726	18.9462	1.34456e-05	9.76224e-05
FADS6	chr17	74877299	74893781	-	2.75345	-0.30462	18.9207	1.36267e-05	9.87886e-05
RP11-706O15.3	chrX	3853010	3882317	-	1.4503	2.6397	18.9206	1.36276e-05	9.87886e-05
CPN1	chr10	100042193	100081877	-	3.43869	-1.46215	18.8737	1.39663e-05	0.000101033
C1QL4	chr12	49332411	49337188	-	2.038	-1.99444	18.8433	1.41906e-05	0.000102548
LINC01101	chr2	120464335	120466218	-	2.70021	-2.88701	18.8417	1.42024e-05	0.000102607
KRT18P16	chr5	123636110	123637403	+	1.35101	-3.75821	18.8283	1.43029e-05	0.000103198
PRR5-ARHGAP8	chr22	44702233	44862784	+	0.723749	0.623	18.826	1.43201e-05	0.000103295
PCSK4	chr19	1481428	1490752	-	0.849663	1.26774	18.8198	1.43672e-05	0.000103581
RP1-34B20.4	chr6	26202156	26202654	+	1.41867	-2.54708	18.8151	1.44021e-05	0.000103725
HID1	chr17	74950743	74973166	-	0.739615	6.96362	18.7906	1.45882e-05	0.000104902
DPEP1	chr16	89613308	89638456	+	2.10952	4.87214	18.7819	1.46553e-05	0.000105275
CTSV	chr9	97029679	97039643	-	1.06826	3.77102	18.738	1.49966e-05	0.000107587
AC007405.4	chr2	170723086	170770768	-	1.16288	-2.29054	18.7218	1.51245e-05	0.000108429
RP5-1125A11.6	chr20	33989480	33991818	-	0.716538	-1.82432	18.72	1.51386e-05	0.000108494
RP11-88I21.1	chr3	127284081	127284681	-	4.06274	-1.7132	18.7167	1.51648e-05	0.000108653
RP11-655M14.13	chr11	67618279	67627304	-	1.52846	-1.96543	18.7059	1.52511e-05	0.000109159
RP11-89H19.2	chr12	47905122	47906865	+	0.822521	-0.0190921	18.6642	1.55884e-05	0.0001112
RNF2P1	chr9	6668999	6670008	-	2.01507	-3.55483	18.6603	1.56204e-05	0.000111367
AIM1L	chr1	26321859	26354130	-	1.01015	4.16957	18.6599	1.56238e-05	0.000111367
BEND3	chr6	107065182	107115269	-	0.581213	3.92922	18.6414	1.5776e-05	0.000112264
RAB17	chr2	237574322	237601614	-	0.587477	3.7048	18.6411	1.5778e-05	0.000112264
ITLN2	chr1	160945025	160954799	-	2.88104	-0.0593862	18.6175	1.59746e-05	0.000113576
CXorf67	chrX	51406915	51408843	+	3.88719	1.42726	18.6049	1.60807e-05	0.000114271
HERC2P5	chr16	32741314	32776196	+	1.55196	-1.30661	18.5751	1.63338e-05	0.000115903
IGF2BP2-AS1	chr3	185712528	185729787	+	1.00292	-1.81144	18.5744	1.63403e-05	0.000115908
ZBTB45P2	chr2	110383112	110384642	+	0.683515	2.33358	18.5615	1.64507e-05	0.000116661
SLC26A1	chr4	979073	993440	-	0.669551	1.93571	18.5528	1.65266e-05	0.00011714
DGCR6	chr22	18906028	18914238	+	0.928404	1.84058	18.5404	1.66342e-05	0.000117692
XXbac-BPG32J3.19	chr6	31706904	31717918	+	5.14	-1.39064	18.5241	1.67767e-05	0.000118488
RP11-785D18.3	chr12	70570969	70571440	+	2.39362	-0.223487	18.5193	1.68195e-05	0.00011873
LYPD2	chr8	142750150	142752534	-	2.8299	3.34213	18.4976	1.70119e-05	0.000119905
LGSN	chr6	63275951	63319977	-	2.58037	0.527315	18.4968	1.70192e-05	0.000119926
CBLC	chr19	44777869	44800634	+	0.745439	5.44615	18.4947	1.70374e-05	0.000120024
IL17RE	chr3	9902612	9916402	+	0.70329	4.81145	18.4763	1.72028e-05	0.000120963
RP11-495P10.7	chr1	148295792	148297271	-	2.65798	-1.4669	18.476	1.72056e-05	0.000120963
CCDC162P	chr6	109285485	109355063	+	1.24578	0.238603	18.4723	1.72393e-05	0.000121138
STK31	chr7	23710167	23832513	+	1.29034	2.19129	18.454	1.74059e-05	0.000122154
RP11-670E13.6	chr17	56914186	56914533	+	0.791823	-0.659697	18.4397	1.75366e-05	0.000122885
LINC01572	chr16	72283301	72665009	-	0.615536	-0.867567	18.4028	1.78799e-05	0.000125069
GRHL3	chr1	24319322	24364482	+	1.35952	2.26465	18.4017	1.789e-05	0.000125108
EPHA10	chr1	37713880	37765133	-	0.785877	2.92339	18.392	1.79811e-05	0.000125651
COL27A1	chr9	114155560	114312511	+	0.780439	5.21603	18.3624	1.82625e-05	0.000127327
FAM83F	chr22	39994949	40043529	+	0.836519	4.40886	18.3467	1.84141e-05	0.000128255
LINC00942	chr12	1500525	1507318	-	1.19488	-2.45379	18.3443	1.84373e-05	0.000128385
RPL3L	chr16	1943974	1957606	-	0.998218	-2.69093	18.3176	1.86968e-05	0.000130029
RP11-30P6.6	chr6	85387219	85390186	-	1.35168	1.74495	18.2638	1.92323e-05	0.000133252
RIMS4	chr20	44751808	44810338	-	2.34168	0.529521	18.2571	1.93006e-05	0.000133625
RP5-968D22.1	chr1	168400829	168422656	-	1.73246	-3.45663	18.2273	1.96051e-05	0.00013553
RP11-90D4.3	chr12	8321876	8329614	+	1.17891	-3.58532	18.2099	1.9785e-05	0.000136638
HSPH1	chr13	31134974	31162388	-	0.582411	7.14907	18.2015	1.98719e-05	0.000137169
PAQR6	chr1	156243321	156248117	-	0.762622	0.881062	18.1831	2.00652e-05	0.000138365
LINC00479	chr21	41711520	41715775	-	1.49798	-2.50577	18.1788	2.01109e-05	0.000138646
TMEM45B	chr11	129815819	129860003	+	0.836024	6.55869	18.1727	2.01753e-05	0.000138952
LRRC46	chr17	47831627	47837713	+	0.700066	-0.0799527	18.1613	2.02963e-05	0.000139716
PP7080	chr5	466124	473098	-	1.16552	5.31322	18.1231	2.07078e-05	0.000142301
GAGE12J	chrX	49322057	49329384	+	8.72655	-1.0139	18.1168	2.07764e-05	0.000142675
CASC11	chr8	127686343	127733967	-	1.1681	-2.41827	18.1167	2.07776e-05	0.000142675
SLC16A5	chr17	75087727	75106162	+	0.679153	4.51183	18.1147	2.0799e-05	0.000142787
MYO3A	chr10	25934267	26212527	+	1.70216	-0.896867	18.1132	2.08155e-05	0.000142796
NEURL3	chr2	96497643	96508109	-	1.31339	1.74735	18.1093	2.08581e-05	0.000143051
DNAH3	chr16	20933111	21159441	-	0.903228	0.829483	18.095	2.10155e-05	0.000143976
TPI1P2	chr7	129056019	129056770	+	0.697874	-2.50813	18.0937	2.10292e-05	0.00014401
KRT10	chr17	40818117	40822595	-	0.738776	5.08204	18.093	2.1037e-05	0.000144028
RP5-1142J19.1	chr7	157281536	157282686	-	1.1301	-3.54731	18.0723	2.1267e-05	0.000145459
AC006273.5	chr19	782755	785080	+	1.01057	-0.593885	18.0555	2.14563e-05	0.000146681
GS1-279B7.2	chr1	185317779	185318530	+	0.670402	-2.6819	18.0221	2.18355e-05	0.000149017
TLCD2	chr17	1702790	1710438	-	0.632112	4.56724	18.0144	2.19235e-05	0.00014958
DCDC2	chr6	24171756	24358052	-	1.55874	2.4922	18.0135	2.1934e-05	0.000149615
TMPOP2	chr16	74667506	74668706	+	1.05392	-3.03177	18.0101	2.19742e-05	0.000149815
KLF2P4	chr2	131299220	131300444	-	2.59034	-1.93435	17.9943	2.21573e-05	0.00015099
CTD-2650P22.2	chr15	52017167	52018032	-	0.906374	-2.10922	17.9418	2.27767e-05	0.000154982
TTC29	chr4	146706638	146945882	-	3.36401	-0.947477	17.9357	2.285e-05	0.000155328
RP11-108L7.15	chr10	101060029	101061005	-	0.665095	-0.946111	17.9329	2.28827e-05	0.000155512
KIF12	chr9	114086126	114099227	-	0.873789	3.77758	17.9035	2.32398e-05	0.000157708
RP11-417L19.6	chr12	131934642	131934928	+	0.684243	-1.70433	17.8835	2.34845e-05	0.000159174
GAGE1	chrX	49589496	49608536	+	8.60729	0.592766	17.8829	2.34919e-05	0.000159184
LINC01301	chr8	60384588	60516795	-	0.898769	-1.41798	17.8628	2.37413e-05	0.000160718
SLC17A8	chr12	100357079	100422059	+	2.41426	-1.52723	17.8339	2.41055e-05	0.000162945
RP11-109J4.1	chr5	160931778	160938626	-	1.77875	-1.66597	17.8269	2.4194e-05	0.000163463
RP11-386G11.10	chr12	49127782	49147869	+	1.99822	1.8396	17.8252	2.42153e-05	0.000163567
RP13-714J12.1	chr12	132424504	132425208	-	1.47041	-2.7317	17.8211	2.4268e-05	0.000163843
RP6-65G23.3	chr14	70810205	70815403	+	0.750958	-0.782093	17.8148	2.43482e-05	0.000164344
TMEM191C	chr22	21466423	21471269	+	0.760187	-0.116294	17.7964	2.4585e-05	0.000165821
BRWD1-AS2	chr21	39313935	39314962	+	0.794877	-1.73947	17.77	2.49282e-05	0.000167688
AC010524.2	chr19	49368705	49388081	-	1.67122	-0.353615	17.7671	2.49659e-05	0.000167901
C16orf59	chr16	2460080	2464963	+	0.612915	2.22244	17.758	2.5086e-05	0.000168667
NFYAP1	chr13	63975451	63976422	-	2.99408	-3.45355	17.7452	2.52547e-05	0.000169637
DGAT1	chr8	144314584	144326910	-	0.594161	6.48208	17.7346	2.53959e-05	0.000170462
IGF2	chr11	2129112	2149603	-	1.78494	8.85698	17.7315	2.54379e-05	0.000170703
HYDIN	chr16	70807378	71230722	-	1.34338	0.152509	17.705	2.57947e-05	0.000172649
RP11-401P9.7	chr16	50555355	50558719	+	1.68499	-1.46311	17.6977	2.58937e-05	0.000173258
SLPI	chr20	45252239	45254564	-	1.12313	6.4381	17.6969	2.59054e-05	0.000173281
ASCL2	chr11	2268495	2270952	-	1.38905	5.00007	17.6965	2.59097e-05	0.000173281
CTD-3065J16.6	chr8	144049129	144051522	+	0.764934	-1.35576	17.6941	2.59435e-05	0.000173424
C9orf163	chr9	136483495	136486067	+	0.657985	-1.15166	17.6847	2.60717e-05	0.000174239
FAM132A	chr1	1242446	1246722	-	1.11909	1.14473	17.6812	2.61189e-05	0.00017447
KCNS1	chr20	45092310	45101112	-	1.57804	-0.0160847	17.6708	2.62623e-05	0.000175259
PROX1	chr1	213983181	214041502	+	1.52076	4.58098	17.6464	2.66019e-05	0.000177141
RAP1GAP	chr1	21596215	21669363	-	1.01641	5.14923	17.6223	2.69411e-05	0.000179271
ATP11A	chr13	112690329	112887168	+	0.589583	7.19876	17.6151	2.70426e-05	0.000179817
RP11-61J19.5	chr1	212557833	212559731	-	0.728305	-0.107864	17.5917	2.73787e-05	0.000181573
RP11-67L3.5	chr1	54886875	54888001	+	0.843127	-2.24657	17.5869	2.74479e-05	0.000181989
CYP4A22-AS1	chr1	47096653	47179271	-	0.976397	-2.82797	17.5841	2.74878e-05	0.000182209
GPR83	chr11	94377311	94401419	-	1.11871	-1.28962	17.5776	2.75814e-05	0.000182786
CTAG1A	chrX	154585143	154586821	+	6.31478	1.1851	17.5722	2.76608e-05	0.000183269
RP11-235E17.6	chr17	3655621	3658092	-	0.654179	-1.30957	17.5449	2.80605e-05	0.000185606
GDF5OS	chr20	35433029	35435450	+	2.6395	-3.89479	17.5418	2.81056e-05	0.000185816
CERS3	chr15	100400395	100544995	-	2.50995	0.240812	17.522	2.83998e-05	0.000187538
AC004593.3	chr7	29199540	29208970	-	1.28493	-3.19843	17.5174	2.84697e-05	0.000187864
BEST3	chr12	69643360	69699476	-	2.1732	-0.712532	17.5059	2.86419e-05	0.000188777
AGRN	chr1	1020123	1056118	+	0.586287	8.44652	17.4983	2.87564e-05	0.000189351
RP1-80N2.3	chr6	6680309	6683633	-	0.663458	-0.0209392	17.4863	2.89392e-05	0.000190326
CTD-3051D23.4	chr14	104857792	104858836	-	0.848631	-1.62216	17.4837	2.89779e-05	0.000190472
POLQ	chr3	121431427	121546641	-	0.65674	3.73079	17.4814	2.90137e-05	0.000190593
KRT6A	chr12	52487174	52493257	-	2.82592	7.25185	17.4765	2.90879e-05	0.000190972
FAHD2P1	chr12	70671918	70672856	+	1.35382	-1.48668	17.4762	2.90921e-05	0.000190972
NCAPH	chr2	96335787	96373845	+	0.597325	4.21379	17.4729	2.91439e-05	0.000191266
LIN28B	chr6	104957048	105083332	+	4.26421	0.235703	17.4723	2.9152e-05	0.000191275
AC012531.25	chr12	54019910	54022589	+	1.20268	-0.657339	17.4627	2.93e-05	0.00019211
GPRIN1	chr5	176595802	176610133	-	0.809452	3.39148	17.4541	2.94329e-05	0.000192844
SAPCD2	chr9	137062124	137070588	-	0.727114	5.74954	17.4527	2.94538e-05	0.000192935
CTD-2589H19.6	chr5	675826	676616	+	0.945577	-0.374638	17.4465	2.95513e-05	0.000193483
GSTTP1	chr22	23998401	24005453	-	2.08248	-3.43586	17.4437	2.95947e-05	0.000193675
WFDC12	chr20	45123425	45124465	-	1.89514	-3.15409	17.4105	3.01163e-05	0.000196717
CTA-989H11.1	chr22	42278188	42278846	+	0.676792	-1.21536	17.4037	3.02239e-05	0.000197281
ADRA2C	chr4	3766348	3768526	+	1.40841	2.27552	17.3968	3.03341e-05	0.000197907
GSG2	chr17	3723903	3726699	+	0.588327	2.89018	17.3907	3.04316e-05	0.000198496
ARHGEF16	chr1	3454426	3481113	+	0.627973	5.27819	17.3902	3.04393e-05	0.0001985
RP11-380N8.7	chr13	26222191	26222654	+	0.810177	-2.90214	17.3572	3.09723e-05	0.000201691
OTX1	chr2	63050057	63057836	+	0.728879	2.7913	17.3542	3.10205e-05	0.000201957
CDH12	chr5	21750673	22853622	-	2.97081	-0.59617	17.3348	3.13399e-05	0.000203846
DUOXA1	chr15	45117367	45129938	-	1.50969	1.9008	17.3316	3.13916e-05	0.000204134
RP11-669N7.2	chr12	129109629	129113294	+	3.56521	0.476793	17.3252	3.14977e-05	0.000204727
RP11-397A16.1	chr18	55721063	55788761	+	1.69044	-3.02091	17.3155	3.16593e-05	0.000205633
LPO	chr17	58218548	58268518	+	1.6203	-2.00408	17.3095	3.17602e-05	0.000206144
CPSF4L	chr17	73248449	73262352	-	1.23899	-3.52124	17.2611	3.25783e-05	0.000211059
CNPY1	chr7	155474206	155533862	-	2.32023	-3.09135	17.233	3.3064e-05	0.000213604
RP11-615I2.3	chr16	68651056	68651948	-	1.19387	-3.63609	17.2326	3.30713e-05	0.000213604
C9orf173-AS1	chr9	137250219	137253497	-	1.03476	-2.45195	17.2304	3.31101e-05	0.000213755
GLTPD2	chr17	4788959	4790390	+	1.1404	1.36409	17.221	3.32736e-05	0.000214561
RP4-756H11.3	chr7	66654538	66669855	+	0.748929	-1.39859	17.2202	3.32876e-05	0.000214601
MCM10	chr10	13161554	13211104	+	0.659134	3.45587	17.2193	3.33032e-05	0.000214652
ALB	chr4	73397114	73421412	+	2.57271	2.52174	17.2112	3.34454e-05	0.000215418
LINC00540	chr13	22040975	22276524	+	1.83385	-0.0778729	17.199	3.36605e-05	0.000216602
RP11-577H5.1	chr7	102755146	102755939	+	0.819118	-1.47532	17.142	3.46865e-05	0.000222584
PYCR1	chr17	81932384	81942412	-	0.605855	6.50225	17.1407	3.47108e-05	0.000222689
PPFIA3	chr19	49119389	49151026	+	0.621376	3.72901	17.1397	3.47282e-05	0.000222749
PNPLA1	chr6	36243203	36308595	+	1.17223	-1.73085	17.1162	3.51619e-05	0.000225374
RAD54L	chr1	46247688	46278473	+	0.625676	3.21369	17.1007	3.545e-05	0.000226959
CTD-2021H9.3	chr12	71047402	71118247	-	1.95147	-2.19589	17.0961	3.55359e-05	0.000227456
C3orf52	chr3	112086335	112131004	+	0.637972	3.43857	17.0948	3.55588e-05	0.00022747
RP11-34P13.15	chr1	135141	135895	-	0.802331	2.05469	17.0946	3.55627e-05	0.00022747
SLC4A11	chr20	3227417	3239190	-	0.974366	4.1111	17.0818	3.58035e-05	0.000228641
MAMDC4	chr9	136850943	136860799	+	0.721294	2.74709	17.0767	3.59006e-05	0.000229208
CDC45	chr22	19479459	19520612	+	0.60599	3.56018	17.0511	3.63872e-05	0.000232101
HS3ST6	chr16	1911463	1918440	-	2.53897	-0.425689	17.0229	3.69318e-05	0.000235359
CTD-2529O21.1	chr17	79991944	79992841	-	1.05457	-2.95175	17.0206	3.69771e-05	0.000235539
HOXC12	chr12	53954834	53958956	+	3.35301	2.21948	17.0164	3.70577e-05	0.000235998
CCAT1	chr8	127207866	127219088	-	1.12692	2.63451	17.0143	3.70987e-05	0.000236205
ADGRG1	chr16	57610652	57665580	+	0.670356	7.42872	17.0101	3.71811e-05	0.000236621
LLNLF-173C4.1	chr19	197961	200775	+	0.744358	1.77766	17.0074	3.72347e-05	0.000236908
BAGE2	chr21	10413477	10516431	+	3.5528	-1.65567	17.0022	3.73359e-05	0.000237497
RP11-78F17.1	chr18	976589	1174823	+	2.35311	-3.61748	16.9802	3.77726e-05	0.00024
AC012501.3	chr2	153420677	153421957	-	2.6372	-2.60143	16.9789	3.77985e-05	0.000240109
DTL	chr1	212035553	212107400	+	0.581509	4.44742	16.9723	3.79296e-05	0.000240667
OIP5	chr15	41309268	41332621	-	0.599531	2.57679	16.9685	3.80043e-05	0.00024103
CTD-2256P15.1	chr5	10248325	10249915	+	1.15947	-3.70155	16.9393	3.85933e-05	0.00024443
AL109763.2	chr21	18561265	18760003	-	4.86429	-2.51901	16.8938	3.95314e-05	0.000249801
GRAMD2	chr15	72159807	72197785	-	1.04584	1.06257	16.8886	3.9639e-05	0.000250424
CASC20	chr20	6446723	6528459	+	2.26078	-3.34594	16.8796	3.98269e-05	0.000251439
GSTO2	chr10	104268873	104304945	+	0.667641	4.30089	16.8679	4.00745e-05	0.000252829
AKAP8P1	chr9	11011748	11013096	+	1.5768	-2.36726	16.8612	4.02156e-05	0.000253604
RP11-495P10.5	chr1	148295180	148297556	+	2.32116	-1.09406	16.8444	4.05719e-05	0.000255619
AC005077.14	chr7	76071469	76074963	-	1.36108	2.10045	16.8414	4.06379e-05	0.000255891
IQCH	chr15	67254800	67502260	+	0.843085	0.993482	16.8411	4.06443e-05	0.000255891
CTD-2207A17.1	chr5	38148480	38153715	+	3.72359	-1.52635	16.8339	4.07977e-05	0.000256749
CTD-3010D24.3	chr17	72642731	72644490	+	1.06259	-0.337615	16.8227	4.10397e-05	0.000258097
GGT1	chr22	24583750	24629005	+	1.02488	4.7521	16.8119	4.12747e-05	0.000259339
CTC-490G23.2	chr19	43329295	43331430	-	1.90938	-0.476582	16.8073	4.13731e-05	0.000259899
SLC25A25-AS1	chr9	128108581	128118693	-	0.626947	4.56835	16.7852	4.18581e-05	0.000262707
MAPK15	chr8	143716259	143722458	+	0.962555	1.67149	16.7843	4.18788e-05	0.000262778
FAM109A	chr12	111360651	111369121	-	0.581491	4.83485	16.7814	4.19415e-05	0.000263112
LINC01004	chr7	104950315	105013044	-	0.763009	-0.653306	16.7779	4.20189e-05	0.000263538
CTD-2008A1.3	chr15	44778196	44778721	-	1.5658	-3.34817	16.7698	4.21988e-05	0.000264606
FOXN4	chr12	109277979	109309220	-	2.67341	-2.77961	16.7594	4.24312e-05	0.000266003
BMS1P8	chr16	33687025	33698504	-	1.64447	-2.86936	16.74	4.28681e-05	0.000268317
SP8	chr7	20782283	20786886	-	2.21073	-0.43186	16.734	4.30032e-05	0.000269041
APCDD1	chr18	10454628	10489948	+	1.29927	5.74317	16.7303	4.30884e-05	0.000269392
SORD	chr15	45023104	45077185	+	0.628677	6.11101	16.727	4.31635e-05	0.000269679
CDC25A	chr3	48157146	48188402	-	0.663242	3.30794	16.7053	4.36585e-05	0.000272527
GPT2	chr16	46884378	46931297	+	0.708181	5.11762	16.6977	4.38352e-05	0.000273568
VSIG8	chr1	159854316	159862657	-	1.82036	-1.00106	16.6908	4.39946e-05	0.000274439
COL6A4P1	chr3	15151833	15205959	-	1.06477	-2.21557	16.6755	4.43511e-05	0.000276476
TST	chr22	37010859	37020183	-	0.620493	5.83489	16.6628	4.46492e-05	0.000278084
FBXO2	chr1	11648367	11655785	-	1.29761	3.56317	16.6601	4.47115e-05	0.000278347
WDR62	chr19	36054881	36105106	+	0.618891	3.97764	16.636	4.52838e-05	0.000281594
CDC20	chr1	43358955	43363203	+	0.631201	5.5786	16.6342	4.5326e-05	0.000281794
BUB1B	chr15	40161023	40221136	+	0.581585	4.57995	16.6324	4.53703e-05	0.000281942
SLC34A3	chr9	137230757	137236554	+	1.35355	-1.63348	16.624	4.55705e-05	0.000283123
MAGEA4	chrX	151912509	151925170	+	5.28585	3.6531	16.6214	4.56324e-05	0.000283444
RP11-1055B8.4	chr17	81388126	81390256	-	0.922733	-0.677871	16.6004	4.61418e-05	0.000286288
PDCL3P3	chr3	17877455	17878169	-	2.29461	-3.92089	16.5931	4.63195e-05	0.000287326
RP4-669L17.8	chr1	491225	493241	-	0.728936	2.13281	16.5885	4.64323e-05	0.000287961
SOWAHB	chr4	76894928	76898147	-	0.76289	2.8471	16.5853	4.65091e-05	0.000288373
CENPA	chr2	26764289	26801067	+	0.622408	3.00887	16.5366	4.772e-05	0.000295155
PDZD7	chr10	101007683	101031157	-	0.835044	0.336869	16.5338	4.7791e-05	0.000295528
MKRN4P	chrX	40834485	40836005	+	2.41598	-2.96095	16.5294	4.79024e-05	0.000296085
PNLDC1	chr6	159800249	159820704	+	1.74069	-1.33186	16.4824	4.91031e-05	0.000302764
SSC4D	chr7	76389334	76409695	-	0.821897	-0.0255888	16.4777	4.92258e-05	0.000303386
HNF1A	chr12	120978543	121002512	+	0.705722	4.71155	16.4672	4.95e-05	0.00030494
RP11-465N4.4	chr1	202000094	202010353	-	0.722424	1.75212	16.4625	4.96216e-05	0.000305418
RP11-672L10.6	chr18	813274	813756	+	0.9264	-2.05289	16.46	4.96864e-05	0.000305681
ERICH2	chr2	170783786	170798971	+	1.13322	-1.33811	16.4508	4.99286e-05	0.000307035
MATN4	chr20	45293445	45308529	-	1.00795	-2.08361	16.4317	5.04352e-05	0.000309875
CCDC78	chr16	722582	726954	-	0.80953	0.579883	16.4278	5.05399e-05	0.000310381
TSTA3	chr8	143612618	143618048	-	0.583825	7.06213	16.4268	5.05639e-05	0.00031046
PTCHD3P3	chr6	109288571	109290503	-	1.60087	-3.74313	16.425	5.06139e-05	0.000310698
RP11-277B15.3	chr1	167219831	167220512	-	0.667244	-1.73551	16.4222	5.06876e-05	0.000311082
RP11-85I17.2	chr8	119838736	119840385	-	0.76384	-2.00328	16.4114	5.09775e-05	0.000312722
NLRP7	chr19	54923509	54966312	-	2.20498	1.50327	16.4093	5.10352e-05	0.000313007
RP5-1061H20.4	chr1	229258281	229271028	-	0.596873	-1.2498	16.4078	5.10745e-05	0.000313178
ESPN	chr1	6424788	6461370	+	1.04907	4.24238	16.385	5.16933e-05	0.000316343
RP5-943J3.2	chr1	89820174	89820868	-	0.682108	-1.81036	16.3537	5.25527e-05	0.000320894
CXorf49B	chrX	71763424	71767204	+	3.39918	-0.150675	16.3098	5.37849e-05	0.000327265
CTD-2288F12.1	chr16	18926863	18937043	+	0.818401	-3.15291	16.2965	5.4164e-05	0.000329283
OR5BA1P	chr11	57866298	57867279	-	1.35962	-2.43609	16.2935	5.42489e-05	0.000329583
CARD14	chr17	80169992	80209331	+	0.972635	2.79588	16.2683	5.49769e-05	0.000333567
TPTE	chr21	10521553	10606140	+	5.60388	-2.10789	16.256	5.53327e-05	0.000335505
KLF5	chr13	73054976	73077542	+	0.597653	8.31623	16.2317	5.60478e-05	0.0003391
NBEAP1	chr15	20657638	20688408	-	1.64971	-2.14482	16.2234	5.62946e-05	0.000340296
FBXW12	chr3	48372219	48401259	+	1.05281	-3.57487	16.2215	5.63523e-05	0.000340496
KCNK15	chr20	44745780	44752313	+	1.43342	2.83431	16.2102	5.66878e-05	0.000342449
TONSL-AS1	chr8	144437675	144439971	+	0.87895	-2.24542	16.1963	5.71068e-05	0.000344754
LINC01205	chr3	109409990	109495167	+	2.99536	-3.73797	16.1889	5.73289e-05	0.000345719
RP11-775L16.1	chr7	55342316	55344958	+	4.32523	-2.02605	16.1863	5.74086e-05	0.000346124
UAP1L1	chr9	137077501	137084539	+	0.60142	4.3252	16.1788	5.76341e-05	0.000347257
TUBB3P1	chr6	89301783	89303114	+	2.06764	-3.84494	16.1728	5.78192e-05	0.000348146
RP11-259N19.1	chr2	74832655	74833987	-	0.655755	-0.0467847	16.1474	5.85989e-05	0.000352458
PROSER2	chr10	11823339	11872277	+	0.7458	3.54792	16.131	5.91087e-05	0.000355216
CNTNAP2	chr7	146116002	148420998	+	1.3484	4.07893	16.1304	5.91266e-05	0.000355246
SLC52A3	chr20	760080	776015	-	0.636387	4.56488	16.1251	5.92944e-05	0.0003561
SYNE4	chr19	36003307	36008793	-	1.20188	1.51396	16.124	5.93272e-05	0.000356143
SPATA31C2	chr9	88129458	88138446	-	2.13176	-2.56	16.1197	5.94613e-05	0.000356794
MAD2L1	chr4	120055608	120067074	-	0.58232	4.85291	16.1102	5.97613e-05	0.000358195
URAHP	chr16	90039761	90047773	-	0.700342	-0.517713	16.1053	5.99164e-05	0.000358758
AC024937.4	chr3	195996738	195998233	+	1.12311	-3.14182	16.1045	5.99415e-05	0.000358758
RP11-187E13.1	chr14	31944853	31950382	+	1.02793	-1.47728	16.0887	6.04438e-05	0.000361126
POTEE	chr2	131218067	131265278	+	1.38762	-0.426812	16.0827	6.06369e-05	0.000361968
MED15P9	chr2	130129621	130139417	+	2.10279	-3.30119	16.0809	6.0693e-05	0.000362225
ERVV-1	chr19	53013921	53016122	+	1.69401	-2.83915	16.0755	6.08675e-05	0.000363188
CEBPA	chr19	33299934	33302564	-	0.886527	5.40849	16.0505	6.16739e-05	0.000367446
NIPAL1	chr4	47914142	48040173	+	0.691677	4.00221	16.0478	6.17622e-05	0.000367735
FAM71E1	chr19	50466785	50476753	-	0.786266	1.26041	16.0369	6.21214e-05	0.000369636
CYP2F1	chr19	41114432	41128366	+	1.37722	-2.13418	16.0339	6.22174e-05	0.00036989
RP3-407E4.3	chr6	63395007	63397106	-	2.86098	-3.46055	16.0125	6.29248e-05	0.000373614
ALS2CL	chr3	46668997	46693704	-	0.731214	4.57666	15.989	6.37117e-05	0.00037764
RP11-458F8.4	chr7	66902857	66906297	+	0.610902	3.30261	15.9846	6.38584e-05	0.000378347
GABRR1	chr6	89177501	89231278	-	2.12847	-0.649081	15.9386	6.54312e-05	0.000386502
RP11-333E13.4	chr4	40042917	40057199	-	0.865449	-2.95435	15.9333	6.56157e-05	0.00038727
SEZ6L2	chr16	29871159	29899547	-	0.754876	6.35148	15.9164	6.6203e-05	0.000389989
NPW	chr16	2009926	2020755	+	1.54115	3.02839	15.9158	6.62253e-05	0.000390037
CCDC166	chr8	143706694	143708109	-	1.81749	-3.54943	15.9101	6.64242e-05	0.000391043
RAB15	chr14	64945814	64972776	-	0.700354	5.21714	15.8992	6.68087e-05	0.000392805
RP11-399J13.2	chr11	65118310	65119111	+	1.06911	-3.21778	15.8973	6.68746e-05	0.00039311
EPS8L3	chr1	109750080	109764027	-	0.748102	6.14904	15.8933	6.70152e-05	0.000393853
PRSS1	chr7	142749468	142763997	+	2.15031	3.19279	15.8915	6.70782e-05	0.00039414
AMH	chr19	2249309	2252073	+	1.22876	1.83922	15.866	6.79883e-05	0.000398895
ULBP1	chr6	149964007	149973710	+	1.22775	0.00237954	15.858	6.82773e-05	0.000400337
STPG2	chr4	97184093	98143240	-	1.29732	-2.83636	15.85	6.85654e-05	0.000401856
C1orf105	chr1	172420688	172468831	+	1.78659	-3.30811	15.8458	6.87196e-05	0.00040259
WDR93	chr15	89690797	89743638	+	0.899612	-1.53559	15.8412	6.88846e-05	0.000403386
PTK7	chr6	43076268	43161719	+	0.795359	6.19894	15.8241	6.9511e-05	0.000406625
NQO1	chr16	69706996	69726951	-	0.762627	7.70699	15.8063	7.01697e-05	0.000410305
BAIAP2L2	chr22	38084889	38110670	-	0.736697	5.57419	15.7931	7.06612e-05	0.000412744
HSPA1B	chr6	31827735	31830255	+	0.701574	8.16232	15.7876	7.0864e-05	0.000413667
U47924.29	chr12	6964949	6965382	+	0.917307	-3.78294	15.7547	7.21103e-05	0.000420058
CTD-2105E13.15	chr19	55377579	55378125	-	0.862076	-2.54298	15.7484	7.23498e-05	0.000421276
CCDC183	chr9	136796350	136807741	+	0.93701	-0.133193	15.7391	7.27072e-05	0.00042309
AP000344.3	chr22	23433564	23435071	+	2.01481	-2.44992	15.7331	7.29376e-05	0.000424342
AF064858.6	chr21	38863676	38956467	-	1.16349	-1.37227	15.719	7.34827e-05	0.000427065
KHDC1L	chr6	73223544	73225770	-	2.34526	-1.93376	15.7096	7.38497e-05	0.000428928
RP11-276H7.3	chr1	16159266	16161883	+	0.752579	-2.17984	15.6973	7.43294e-05	0.000431263
PRSS45	chr3	46742092	46812558	-	2.27422	-2.34966	15.6931	7.44949e-05	0.000432133
HIST3H2BB	chr1	228458107	228460470	+	1.00686	-0.369234	15.6806	7.49909e-05	0.000434919
USP43	chr17	9644698	9729691	+	0.581309	3.46631	15.6628	7.56996e-05	0.000438662
RP11-65J3.3	chr9	129430652	129451422	-	1.56584	-3.88445	15.656	7.59714e-05	0.000440054
KRTAP3-1	chr17	41008521	41019324	-	4.70487	0.336094	15.6523	7.61213e-05	0.000440796
C2orf48	chr2	10141382	10211725	+	0.964234	-0.759659	15.652	7.61315e-05	0.000440796
APOA5	chr11	116789367	116792420	-	1.99092	-2.30168	15.6472	7.63237e-05	0.000441633
AC007405.6	chr2	170771113	170778148	+	0.919038	0.177299	15.639	7.66584e-05	0.000443384
NOTO	chr2	73202258	73212513	+	2.04834	-3.95013	15.6383	7.66859e-05	0.000443451
HEPHL1	chr11	94021361	94113751	+	1.86053	0.344901	15.6281	7.71006e-05	0.00044557
TKTL1	chrX	154295671	154330350	+	2.55715	2.35065	15.6201	7.74267e-05	0.000447361
CLDN12	chr7	90383721	90513402	+	0.636421	6.16597	15.6117	7.77733e-05	0.000449177
RNASEH1P1	chr17	20901939	20902680	-	3.37833	-2.74562	15.5787	7.91423e-05	0.000456418
GMCL1P2	chr2	108367116	108367938	+	1.68327	-3.81438	15.5769	7.92184e-05	0.000456762
TSACC	chr1	156337314	156346995	+	0.710762	-1.10719	15.5674	7.96164e-05	0.00045858
PTCHD3P2	chr2	169767185	169768799	-	1.49223	-1.51396	15.5637	7.97725e-05	0.000459384
TICRR	chr15	89575482	89631056	+	0.623966	4.05971	15.542	8.06942e-05	0.000464113
RP11-58O9.2	chr17	40473554	40475289	-	1.47447	2.53167	15.5206	8.16122e-05	0.000468809
HOXC11	chr12	53973126	53977643	+	1.1819	2.34687	15.5127	8.19532e-05	0.000470379
WNT3A	chr1	228007051	228061260	+	1.80379	-2.24755	15.5071	8.21948e-05	0.000471667
PRSS8	chr16	31131433	31135762	-	0.740953	7.38219	15.5032	8.23668e-05	0.000472412
CT45A5	chrX	135777130	135785298	-	5.51804	0.289771	15.5017	8.24333e-05	0.000472645
EEF1A2	chr20	63488013	63499315	-	1.92747	4.32947	15.4989	8.25542e-05	0.00047324
RP11-629B11.5	chr4	74156511	74158373	-	0.614364	-1.91279	15.498	8.2591e-05	0.000473353
AC004156.3	chr19	663482	669500	+	0.830503	-2.38437	15.4933	8.27989e-05	0.000474349
RP11-484K9.4	chr3	112990447	112991153	-	0.986459	-3.56713	15.4854	8.31431e-05	0.000476026
NAGS	chr17	44004546	44009063	+	0.817308	1.93796	15.4769	8.35212e-05	0.000478092
RP11-320G24.1	chrX	40262917	40287720	+	1.28695	-1.31947	15.4733	8.36809e-05	0.000478709
RP1L1	chr8	10606349	10712187	-	1.00811	-0.821032	15.4729	8.36987e-05	0.000478712
CTD-2540F13.2	chr19	38738284	38739863	+	0.948374	-0.0726866	15.4604	8.42499e-05	0.000481362
DLGAP1-AS2	chr18	3603000	3608336	+	0.777321	2.17592	15.4586	8.43341e-05	0.000481651
SLC6A11	chr3	10816200	10940733	+	1.91513	-1.31972	15.4548	8.45003e-05	0.000482501
RP11-29H23.7	chr1	155566050	155566306	-	0.736819	-3.2002	15.4439	8.49916e-05	0.000484907
ATP6V1C2	chr2	10721649	10785110	+	0.861284	2.67848	15.4146	8.63166e-05	0.000491455
CLPSL2	chr6	35776594	35779552	+	2.4433	-3.62708	15.4092	8.65643e-05	0.000492461
ATP1B1	chr1	169105697	169132722	+	0.616798	8.86785	15.4053	8.67428e-05	0.000493173
RP11-317L10.1	chr3	24496272	24499580	-	2.76592	-2.91553	15.3731	8.82372e-05	0.000500733
KCNK5	chr6	39188973	39229450	-	0.765051	4.97037	15.3723	8.82738e-05	0.000500733
SYNGR4	chr19	48364395	48376376	+	1.30331	-0.18912	15.3627	8.87241e-05	0.00050298
LAPTM4B	chr8	97775057	97853013	+	0.610168	7.48894	15.3597	8.88618e-05	0.000503395
CYP27B1	chr12	57762334	57768986	-	0.745507	1.7971	15.3567	8.90064e-05	0.000503873
RP11-465B22.3	chr1	1059734	1069355	+	0.928474	-0.338072	15.3473	8.94494e-05	0.000506277
RP5-908M14.5	chr20	62427827	62447621	+	1.58998	-2.66563	15.3449	8.95647e-05	0.000506827
RP13-1039J1.2	chr2	110402914	110435166	-	1.81198	-2.16032	15.3305	9.0248e-05	0.000509861
AC007131.1	chr2	59217708	59279400	+	3.28162	-3.55111	15.3097	9.12446e-05	0.000514548
PROSER2-AS1	chr10	11849608	11894700	-	1.0089	-1.04025	15.2636	9.35008e-05	0.000525719
SPATA12	chr3	57060441	57075432	+	0.672206	-0.513844	15.2503	9.41599e-05	0.000529051
HOXC8	chr12	54009106	54012362	+	1.05119	0.52705	15.2364	9.48566e-05	0.000532426
ZDHHC11	chr5	795606	850986	-	0.871094	2.20176	15.2364	9.48566e-05	0.000532426
CNBD2	chr20	35954564	36030700	+	0.861033	-0.382614	15.2307	9.5142e-05	0.00053338
PLEKHG6	chr12	6310436	6328506	+	0.738933	5.12892	15.1961	9.69008e-05	0.000542582
SPATA17	chr1	217631324	217871696	+	0.786556	0.183988	15.1804	9.77134e-05	0.00054669
REEP6	chr19	1490747	1497927	+	0.972572	4.9568	15.1741	9.80389e-05	0.00054818
DSG1	chr18	31318089	31357029	+	2.26211	1.11455	15.1717	9.81626e-05	0.000548559
TRPM6	chr9	74722495	74888094	-	1.35024	1.32077	15.1599	9.87805e-05	0.000550916
TBC1D4	chr13	75284665	75482114	-	0.637103	5.17493	15.1553	9.90174e-05	0.000552092
CTB-55O6.8	chr19	14072536	14075062	+	0.672897	4.22815	15.1273	0.000100502	0.000559544
GHET1	chr7	148987527	148989432	+	0.586343	-1.15564	15.127	0.000100515	0.000559544
SPAG17	chr1	117953861	118185223	-	1.57042	-0.0456302	15.1257	0.000100586	0.000559826
CSAG1	chrX	152727484	152733735	-	2.5772	2.05122	15.1193	0.000100928	0.000561614
LINC00887	chr3	194296465	194312803	-	1.05444	-1.53834	15.0944	0.000102267	0.000568496
GS1-393G12.14	chr8	144409492	144409976	+	0.625682	-0.792797	15.09	0.000102504	0.0005697
HSPD1P1	chr5	21882585	21884310	+	0.660238	-0.695496	15.0757	0.000103286	0.000573588
KIAA1549	chr7	138831381	138981318	-	0.661143	4.42021	15.0689	0.000103658	0.000575304
GRK7	chr3	141778148	141818490	+	1.13439	-3.24419	15.0447	0.000104995	0.000581561
CT45A1	chrX	135713453	135723539	+	7.86617	1.28768	15.0433	0.000105075	0.000581888
YBX2	chr17	7288252	7294615	-	1.08964	3.40982	15.0387	0.000105331	0.000583073
AC144652.1	chr7	155295918	155297541	-	0.675312	-0.292145	15.0313	0.000105744	0.000585125
TNNI1	chr1	201403768	201429866	-	0.66439	2.00007	15.0234	0.000106189	0.000587353
LINC00221	chr14	106482439	106521073	+	3.82667	-1.4122	15.0157	0.000106622	0.000589396
AC090945.1	chr3	15878047	15879571	+	0.655306	-2.2113	15.01	0.000106944	0.000590942
NOX1	chrX	100843324	100874345	-	1.87922	3.33522	14.9782	0.000108763	0.000599796
HAP1	chr17	41717742	41734644	-	1.43761	0.343757	14.9768	0.000108843	0.000600119
IGSF9	chr1	159927039	159945604	-	0.830722	4.3964	14.974	0.000109005	0.000600775
CELSR2	chr1	109250019	109275750	+	0.71246	5.25806	14.9689	0.0001093	0.000602039
RP1-117B12.4	chr17	50396438	50397888	+	1.01155	-2.88233	14.9637	0.000109597	0.000603558
RNF224	chr9	137227271	137229638	+	1.14367	-1.67673	14.9383	0.000111086	0.000610061
RP4-738P11.4	chr1	168578653	168579439	-	1.74273	-3.88884	14.9305	0.000111547	0.000611985
ADRA2B	chr2	96112875	96116245	-	0.853588	0.146407	14.911	0.000112702	0.000616735
ULBP2	chr6	149942000	149949235	+	1.09458	1.56278	14.9052	0.000113053	0.000618413
CTCFL	chr20	57495966	57525652	-	3.0409	1.27903	14.8895	0.000113996	0.000622959
CEACAM8	chr19	42580241	42740384	-	1.45038	-3.12036	14.8872	0.000114136	0.000623561
SNORD3B-2	chr17	19063346	19064136	-	1.38062	0.36789	14.8641	0.00011554	0.000630375
VCX	chrX	7842262	7844143	+	4.31246	0.407605	14.8626	0.000115634	0.000630664
ITPKA	chr15	41493393	41503551	+	0.825816	3.41416	14.8555	0.000116072	0.00063243
AFP	chr4	73431138	73456174	+	2.20558	-0.677227	14.81	0.000118901	0.000646447
ZNF663P	chr20	46414228	46459276	-	2.04501	-1.60155	14.8087	0.000118986	0.000646707
NOXA1	chr9	137423350	137434406	+	0.594617	2.65627	14.7966	0.000119753	0.000650186
FTLP14	chr16	68822587	68823070	+	0.78701	-0.300908	14.7924	0.000120016	0.000651489
SH3D21	chr1	36306387	36324886	+	0.688881	2.78417	14.792	0.000120043	0.000651505
CDH1	chr16	68737225	68835548	+	0.651838	8.52117	14.7841	0.000120545	0.00065385
RP11-511H23.2	chr7	17940503	17942922	+	0.605178	-0.930903	14.76	0.0001221	0.000662026
DUXAP8	chr22	15784959	15829984	+	0.949142	3.74952	14.7555	0.000122392	0.000663348
RP11-5A19.5	chr16	67163385	67165815	+	0.731683	0.19281	14.7506	0.000122709	0.000664807
UNC93A	chr6	167271169	167316019	+	1.52273	1.84456	14.7218	0.000124599	0.000673994
LINC00648	chr14	47764954	47795092	-	3.26752	-0.404702	14.7107	0.000125331	0.000677488
TRIM31-AS1	chr6	30105240	30114724	+	0.840891	-2.77471	14.6991	0.00012611	0.0006815
CASC21	chr8	127339274	127392631	+	1.78392	-3.63455	14.6953	0.000126363	0.000682466
MTNR1A	chr4	186533655	186555567	-	1.61117	-1.42347	14.6909	0.000126655	0.000683635
RHBDL1	chr16	675666	678268	+	0.743394	0.802757	14.6906	0.000126678	0.000683635
CLPSL1	chr6	35781017	35793675	+	2.28212	-2.63175	14.6901	0.000126713	0.000683694
CA7	chr16	66844379	66854153	+	1.20815	-2.81575	14.6831	0.00012718	0.000685813
KRT31	chr17	41393724	41397592	-	4.32176	-2.42518	14.6825	0.000127223	0.000685909
CTB-171A8.1	chr19	44632199	44718759	-	0.775261	-0.709701	14.6814	0.000127295	0.000686168
GRM8	chr7	126438598	127253294	-	0.937587	-0.0686794	14.6733	0.000127842	0.000688844
SNTB1	chr8	120535745	120813273	-	0.82101	5.28977	14.6645	0.000128445	0.000691824
JPH1	chr8	74234700	74321328	-	0.976772	3.75413	14.6566	0.00012898	0.000694571
KRT6B	chr12	52446651	52452126	-	2.34339	5.54509	14.655	0.000129089	0.000695024
AC005481.5	chr7	157614023	157618765	+	1.16119	-1.73509	14.6512	0.000129352	0.000695902
RP11-496I2.2	chr14	19244962	19247673	+	1.50252	-2.71057	14.6465	0.000129675	0.000697367
LINC00543	chr13	27953526	27955370	+	0.845506	1.76634	14.6454	0.000129753	0.000697519
DDX53	chrX	22999961	23003589	+	2.94039	-1.84313	14.6233	0.000131281	0.000704886
KLK12	chr19	51029092	51035230	-	2.41113	0.938019	14.6228	0.000131317	0.000704886
FAM178B	chr2	96875882	97018438	-	1.70061	0.468273	14.585	0.000133975	0.00071729
PCAT1	chr8	126847055	127021014	+	0.772002	-1.89726	14.5653	0.000135387	0.00072457
LINC00967	chr8	66192093	66197315	+	3.06244	-2.03596	14.5584	0.000135883	0.000726665
SH2D6	chr2	85418721	85437029	+	1.0945	-1.72219	14.5472	0.000136688	0.00073055
AUNIP	chr1	25831913	25859458	-	0.582509	1.95114	14.5386	0.000137314	0.000733613
ENTPD8	chr9	137434364	137441816	-	1.26041	3.26196	14.5288	0.000138035	0.000737179
AC005355.2	chr5	134506552	134509229	+	0.747039	0.786194	14.5181	0.000138821	0.000740523
RP11-504A18.1	chr1	56248294	56258571	-	0.858082	-3.41674	14.5063	0.000139694	0.00074447
AC012363.7	chr2	120211054	120211715	+	0.75144	-2.97782	14.5045	0.000139825	0.000745018
DIO3	chr14	101561351	101563452	+	1.51664	0.635677	14.496	0.000140461	0.000747832
RP11-219B4.5	chr8	85222446	85245717	-	0.761141	-2.30686	14.4955	0.000140496	0.000747873
LINC01134	chr1	3900372	3917225	+	0.712052	-0.485044	14.4928	0.000140697	0.000748658
NWD1	chr19	16719976	16817963	+	1.17897	0.602495	14.4915	0.000140793	0.000749022
RP11-380O24.1	chr3	9292588	9363303	-	0.741854	-2.25155	14.4764	0.000141926	0.000754471
AC010761.9	chr17	28745569	28747652	-	0.793706	-1.17615	14.4469	0.000144168	0.000765364
HPDL	chr1	45326905	45328533	+	0.807369	3.56544	14.441	0.00014462	0.000767029
C19orf26	chr19	1228287	1238027	-	0.800091	1.63097	14.4248	0.000145872	0.000772789
RP11-837J7.3	chr12	109997419	109999127	-	0.730602	-2.12577	14.4134	0.000146755	0.000776718
RP13-147D17.3	chrX	125320120	125325214	+	4.61727	-1.51566	14.4109	0.000146946	0.000777581
KAZALD1	chr10	101061841	101068131	+	0.60274	2.93419	14.4078	0.000147188	0.000778414
TUBB8P12	chr18	47221	73545	-	1.57811	-2.25395	14.4074	0.000147226	0.000778466
NKD1	chr16	50548330	50640739	+	1.59149	5.49858	14.4018	0.00014766	0.000780314
PTK6	chr20	63528001	63537370	-	0.725417	5.1001	14.4005	0.000147766	0.000780726
RP3-325F22.5	chr6	136550661	136552554	+	0.722165	1.44821	14.4	0.000147805	0.000780761
LINC00898	chr22	47621043	47631569	-	2.27991	-3.66274	14.3958	0.000148134	0.000782222
TLDC2	chr20	36876121	36894235	+	0.798059	2.90729	14.3926	0.000148385	0.000783254
KIF25-AS1	chr6	167992822	167997077	-	1.94165	-1.69517	14.3849	0.000148989	0.000785692
C1orf110	chr1	162824458	162868815	-	1.96166	1.22211	14.3762	0.000149681	0.00078919
HOXD11	chr2	176104216	176109754	+	3.78281	-0.518853	14.367	0.000150418	0.000792777
KLF2P1	chr2	130036958	130038422	+	2.14525	-1.84828	14.366	0.000150495	0.000793028
RTKN2	chr10	62183035	62268707	-	0.626966	3.39002	14.3656	0.000150527	0.000793047
LL22NC03-N64E9.1	chr22	15796959	15798346	+	1.2975	-0.624389	14.3649	0.00015058	0.000793175
TUBA3C	chr13	19173770	19181852	-	4.06677	0.581163	14.3573	0.00015119	0.000795937
C6orf223	chr6	44000580	44005958	+	1.25658	3.54595	14.3397	0.000152609	0.000802644
CCDC64B	chr16	3027682	3036926	-	0.584583	4.25965	14.3265	0.000153687	0.000807549
DBNDD1	chr16	90004865	90020128	-	0.776689	4.71349	14.3208	0.000154149	0.000809822
KRT18	chr12	52948871	52952901	+	0.614486	9.82304	14.3174	0.000154427	0.000810931
RP1-140K8.5	chr6	3904920	3911979	-	1.25083	1.58349	14.317	0.00015446	0.000810931
AC002310.7	chr16	30572250	30583860	+	0.958393	-1.75292	14.3168	0.000154477	0.000810931
RBPJL	chr20	45306851	45317824	+	1.67739	-3.39368	14.304	0.000155531	0.000815228
GPR3	chr1	27392644	27395814	+	0.757327	1.08833	14.2886	0.000156811	0.000821626
PKMYT1	chr16	2968024	2980539	-	0.597249	4.69009	14.2717	0.000158223	0.000828763
RP11-826F13.1	chr11	70603304	70604859	+	0.864615	-2.70346	14.2716	0.000158232	0.000828763
AC141928.1	chr4	3758748	3763390	-	1.59514	0.30424	14.2692	0.000158434	0.000829531
DCST1	chr1	155033824	155050930	+	0.780782	-3.3348	14.2668	0.00015864	0.000830268
RHPN2	chr19	32978593	33064888	-	0.621044	6.57955	14.2456	0.000160436	0.000838721
ACRV1	chr11	125671522	125681123	-	0.657643	-2.05301	14.2361	0.000161251	0.000842026
FRMD5	chr15	43870761	44195252	-	0.769728	2.83764	14.2348	0.000161358	0.000842429
C19orf45	chr19	7492976	7508450	+	1.00975	-0.0709647	14.2011	0.00016427	0.000856021
VIL1	chr2	218419092	218453295	+	0.854848	7.22178	14.1887	0.000165361	0.000861221
PRSS2	chr7	142748662	142774564	+	2.19215	5.55298	14.1807	0.000166063	0.000864711
CRISP3	chr6	49727384	49744437	-	2.86204	3.71242	14.1802	0.000166112	0.000864806
CT55	chrX	135156536	135171398	-	2.0882	-1.11999	14.1582	0.000168064	0.000873493
ADAMTSL5	chr19	1505018	1513604	-	0.700746	2.9586	14.1399	0.000169706	0.00088087
C5orf60	chr5	179641544	179645046	-	1.20635	-3.23487	14.1248	0.000171069	0.000886453
KLHL31	chr6	53647901	53665708	-	0.692798	-0.144867	14.1218	0.000171347	0.000887562
RP11-496H1.1	chr3	197634315	197635811	+	0.685414	0.725095	14.1135	0.000172104	0.000890984
PLEKHD1	chr14	69484692	69531551	+	1.17363	-0.388351	14.0903	0.000174236	0.00090101
PTMAP1	chr6	30633632	30633956	+	0.817144	-2.7082	14.089	0.000174357	0.000901468
MST1R	chr3	49887002	49903873	-	0.67158	5.98723	14.0848	0.000174749	0.000903159
AP000344.4	chr22	23446598	23460833	+	1.94039	-2.60168	14.0698	0.000176146	0.000909528
CPB2	chr13	46053186	46105076	-	1.70794	-3.27811	14.0654	0.00017656	0.000911328
AC011747.3	chr2	8543592	8575501	-	0.893949	-2.76337	14.0503	0.000177984	0.000917654
GABRA3	chrX	152166234	152451358	-	2.54734	1.7377	14.0491	0.000178096	0.000917892
TSPAN6	chrX	100627109	100639991	-	0.641718	5.09542	14.0438	0.000178604	0.000920293
ADRB1	chr10	114044056	114046908	+	0.9615	0.803702	14.0435	0.000178629	0.000920293
CLK2P1	chr7	23585062	23586355	-	1.24456	-3.54031	14.0353	0.000179409	0.000923971
RP11-66B24.7	chr15	100849831	100865457	+	1.28196	-1.43452	14.0324	0.000179685	0.000925218
TNFRSF11B	chr8	118923557	118952200	-	1.18877	3.67057	14.0181	0.00018106	0.000931259
RP1-86C11.7	chr6	27122657	27123221	-	0.938296	-1.503	13.9921	0.000183584	0.00094302
SFTA3	chr14	36473288	36513829	-	2.99352	-2.57618	13.9847	0.000184304	0.000946015
SNCAIP	chr5	122311354	122464219	+	1.15875	2.95831	13.9668	0.000186067	0.000953828
ADM2	chr22	50481556	50486440	+	0.716467	3.63526	13.9477	0.000187966	0.000962499
DCDC1	chr11	30830369	31369810	-	1.09688	-1.98245	13.9466	0.000188075	0.000962879
DUSP9	chrX	153642492	153651326	+	1.94493	0.431713	13.9358	0.00018916	0.000967361
STK24-AS1	chr13	98577244	98578830	+	0.764738	-2.06475	13.9324	0.000189499	0.000968915
LRRC75B	chr22	24585620	24593208	-	0.668146	3.20442	13.9099	0.00019179	0.000979904
ESPNP	chr1	16687339	16720157	-	1.33472	-1.1376	13.9079	0.000191988	0.000980637
TOB2P1	chr6	28217643	28218634	-	0.883479	-1.4501	13.9078	0.000192004	0.000980637
HSP90AB7P	chr10	9721963	9724416	-	2.1958	-4.15029	13.9035	0.000192444	0.000982705
RP11-473M10.3	chr13	63746741	63751080	+	3.14677	-3.38857	13.9022	0.000192573	0.000983108
RP11-5O17.1	chr3	53046166	53048122	+	0.594452	-0.175848	13.9013	0.000192665	0.000983108
KRT34	chr17	41377650	41382403	-	2.82581	-3.56206	13.8988	0.000192926	0.000984261
LA16c-380H5.5	chr16	3006120	3007388	+	0.883327	0.81952	13.8723	0.000195663	0.000996207
RP13-228J13.5	chrX	155348752	155349799	+	0.893207	-2.82947	13.8697	0.000195928	0.000997188
MCIDAS	chr5	55219614	55227315	-	0.846887	0.400481	13.8606	0.000196878	0.00100166
SYT14	chr1	209938174	210171315	+	1.27982	-0.792521	13.843	0.000198731	0.00100997
COL20A1	chr20	63293186	63334851	+	1.72706	-1.66716	13.8394	0.000199118	0.00101138
RP11-452I5.2	chr17	74747319	74748912	-	0.646116	0.461453	13.8228	0.000200888	0.00101869
RP11-746P2.3	chr7	65355934	65357176	+	1.75064	-3.88846	13.816	0.000201616	0.00102195
TFAP2C	chr20	56629302	56639283	+	1.25196	2.21083	13.8072	0.000202559	0.00102642
AMDHD1	chr12	95943293	95968716	+	1.08537	-0.138257	13.7995	0.000203394	0.00102971
BANF2	chr20	17693672	17735871	+	2.13564	-3.40721	13.7983	0.000203526	0.00103007
B3GNT3	chr19	17794828	17813082	+	0.598499	6.38939	13.7901	0.000204415	0.00103355
RP11-523H20.3	chr2	74501717	74502365	+	0.612393	-1.4418	13.7889	0.000204543	0.00103401
MAGEA12	chrX	152733779	152737669	+	3.15073	2.42622	13.7835	0.000205128	0.00103641
LINC01257	chr12	131165011	131212931	+	2.79104	-2.34604	13.7828	0.000205205	0.00103661
NCAN	chr19	19211973	19252233	+	1.44851	-2.39767	13.7797	0.000205549	0.00103777
AC016700.5	chr2	70124036	70125317	-	0.815002	-0.565733	13.7731	0.000206266	0.00104091
AC012363.8	chr2	120211727	120212862	+	0.745633	-3.11318	13.7708	0.00020652	0.00104192
SPATA3-AS1	chr2	230984368	230996032	-	0.934791	-1.43808	13.7665	0.000206997	0.00104413
PRR7	chr5	177446445	177456286	+	0.620211	3.6149	13.7633	0.000207351	0.00104573
PERP	chr6	138088505	138107511	-	0.59294	8.00163	13.7608	0.000207628	0.00104674
FDFT1	chr8	11795573	11839309	+	0.61418	7.14575	13.7593	0.000207793	0.0010472
SPATA31C1	chr9	87914493	87923505	+	2.10021	-3.55616	13.7579	0.00020794	0.00104775
SLC5A12	chr11	26667019	26723427	-	1.33579	0.292265	13.7555	0.000208214	0.00104894
FGF23	chr12	4368227	4379728	-	2.16682	-2.41271	13.742	0.000209711	0.00105572
APOBEC3B	chr22	38982347	38992804	+	0.786595	3.67152	13.7249	0.000211627	0.00106401
RP11-395L14.13	chr2	113667478	113668621	-	2.30096	-2.54101	13.7239	0.000211743	0.0010644
SIM2	chr21	36699133	36749917	+	0.682332	4.72708	13.7183	0.000212375	0.00106719
CCNB3	chrX	50202713	50351910	+	0.863986	0.0949669	13.7048	0.000213909	0.00107431
RP11-84A19.2	chr1	31842019	31855568	-	1.64028	-3.12858	13.6998	0.000214475	0.00107676
HIST1H2BN	chr6	27837760	27865798	+	0.610726	1.15633	13.6979	0.000214689	0.00107764
EPHA2	chr1	16124337	16156087	-	0.66091	6.97967	13.6953	0.000214997	0.00107899
TRIB3	chr20	362835	397559	+	0.881617	4.82245	13.6868	0.000215968	0.00108328
MAPK8IP2	chr22	50600685	50613981	+	1.06794	3.47142	13.681	0.000216636	0.00108604
DLX2	chr2	172099439	172102900	-	1.82181	0.0902118	13.6611	0.000218945	0.00109623
RP11-365D9.1	chr1	235614674	235616397	+	1.88942	-2.94542	13.6572	0.000219404	0.00109813
DMRT1	chr9	841690	969090	+	1.88487	-3.69097	13.6427	0.000221095	0.00110599
RP11-423F24.3	chr1	231021611	231022183	+	0.631174	-3.40185	13.6419	0.000221188	0.00110626
CYP4F30P	chr2	130680050	130691691	+	2.08637	-2.44053	13.6198	0.000223816	0.00111759
CES4A	chr16	66988589	67009758	+	0.746374	1.19856	13.6139	0.000224523	0.00112051
RP11-434D9.1	chr5	67379378	67805238	+	1.31855	-3.74124	13.6126	0.000224674	0.00112107
SAPCD1	chr6	31762799	31764851	+	0.757737	-0.240852	13.6089	0.000225114	0.00112286
MKRN3	chr15	23565678	23630075	+	1.73623	-0.146774	13.6065	0.000225406	0.00112391
VCX3A	chrX	6533618	6535118	-	5.12667	1.47859	13.6054	0.000225538	0.0011241
NKX2-1	chr14	36516392	36521149	-	3.93489	-0.251348	13.6044	0.00022566	0.00112416
BCL2L10	chr15	52109263	52112775	-	1.25997	0.0499898	13.5933	0.000226997	0.00112961
RP11-762I7.5	chr12	55757275	55827546	-	1.19186	-0.46545	13.5846	0.000228049	0.00113403
MAGEA2	chrX	152749863	152753884	-	3.16172	2.32973	13.5813	0.00022845	0.00113561
ABHD1	chr2	27123789	27130812	+	0.818364	-1.119	13.5706	0.00022975	0.00114085
RP5-881L22.6	chr20	44389624	44391537	-	0.95553	-3.74089	13.5369	0.000233919	0.0011603
SOWAHA	chr5	132813587	132816797	+	0.962617	3.3345	13.5305	0.000234716	0.00116384
RP4-813D12.3	chr20	57266797	57282998	+	1.78763	-3.16198	13.4986	0.000238738	0.00118188
EXD1	chr15	41182725	41230743	-	1.44617	-3.47575	13.498	0.000238824	0.0011821
COX7B2	chr4	46734827	46909235	-	4.82614	-1.44227	13.4956	0.000239129	0.00118339
MISP	chr19	751126	764318	+	0.621015	7.74786	13.4915	0.000239647	0.00118575
PAQR8	chr6	52361421	52407777	+	0.582576	5.81577	13.4769	0.00024152	0.00119374
PRSS3	chr9	33750466	33799231	+	0.819285	5.80795	13.47	0.000242411	0.0011975
C5orf52	chr5	157671553	157680143	+	1.50719	-3.34533	13.4635	0.000243254	0.00120124
RP11-1055B8.1	chr17	81395609	81397144	-	0.850807	0.262116	13.4561	0.000244217	0.00120514
EFNA2	chr19	1286154	1300237	+	1.08067	2.56728	13.4421	0.000246039	0.00121218
RP3-417L20.4	chr6	49817430	49820442	+	3.31421	-3.93441	13.4374	0.000246654	0.00121457
FAM221A	chr7	23680130	23703249	+	0.596425	3.56253	13.4337	0.000247148	0.00121628
RP4-775C13.1	chr20	6213699	6215381	+	0.623103	-2.84608	13.4334	0.000247178	0.00121628
TREX2	chrX	153444720	153470587	-	0.809418	-0.348267	13.4289	0.000247771	0.00121877
VTN	chr17	28367276	28373091	-	1.65778	3.58808	13.4273	0.000247992	0.00121964
RP11-1103G16.1	chr14	30437992	30573629	-	2.47331	-2.89148	13.4201	0.000248942	0.00122388
LRRC8E	chr19	7888505	7902021	+	0.63323	2.9916	13.4171	0.000249338	0.00122539
NEK2P4	chr2	131177618	131178946	-	2.3798	-3.84644	13.413	0.00024989	0.00122788
SLC43A1	chr11	57484534	57515786	-	0.625517	4.82112	13.4049	0.00025097	0.00123232
RP13-1039J1.4	chr2	110386411	110433673	-	1.31799	-0.787417	13.3998	0.000251657	0.00123545
RP11-30H9.1	chr14	28857384	28858701	-	3.23371	-3.91904	13.3854	0.000253591	0.0012432
GALNT3	chr2	165747591	165794682	-	0.581447	6.41771	13.3784	0.000254541	0.00124742
AMBP	chr9	114060127	114078472	-	1.28093	0.817371	13.3628	0.000256667	0.00125673
RP11-185E8.2	chr3	171460612	171462256	+	0.743465	0.121271	13.3591	0.000257174	0.00125899
GRID2IP	chr7	6497462	6551436	-	0.663188	-0.399805	13.3576	0.000257373	0.00125952
NBEAP3	chr22	15852990	15893942	+	1.00903	-1.31533	13.3428	0.000259411	0.00126927
MIR210HG	chr11	565660	568457	-	0.778376	1.30513	13.3412	0.000259638	0.00127016
XAGE1B	chrX	52512077	52520803	-	3.54454	0.925157	13.3382	0.000260051	0.00127195
RP11-510N19.5	chr1	202011370	202015657	+	0.816918	1.41831	13.3377	0.000260122	0.00127207
PRR15L	chr17	47951967	47957878	-	0.591445	6.16765	13.3293	0.000261286	0.00127687
RP11-120K24.5	chr13	113009671	113010319	+	1.26287	-1.68785	13.3198	0.00026262	0.00128248
CCSER1	chr4	90127535	91601913	+	0.703466	1.7044	13.3106	0.000263908	0.00128786
RNF43	chr17	58352500	58417595	-	0.86761	6.02306	13.3064	0.000264507	0.00129033
PDE11A	chr2	177623252	178108339	-	0.986608	1.55306	13.2979	0.000265702	0.00129548
CTD-2540B15.9	chr19	33305036	33309387	+	1.07864	-3.67024	13.2861	0.000267374	0.00130337
RBMXP2	chr9	30689105	30690272	+	0.887503	-2.4287	13.2599	0.00027115	0.00131972
GLDCP1	chr4	56593004	56595681	+	1.92819	-4.06721	13.2525	0.000272223	0.00132434
ASPHD1	chr16	29900375	29919864	+	0.882153	3.6676	13.2515	0.000272358	0.00132444
FAR2P1	chr2	129990456	130051131	-	1.85943	1.28878	13.2511	0.000272427	0.00132454
LINC01002	chr19	198264	239440	-	0.638763	4.34067	13.2329	0.000275074	0.00133624
SLC16A8	chr22	38078134	38084093	-	0.740566	-0.895521	13.2304	0.000275443	0.0013378
VCX3B	chrX	8464830	8466510	+	4.55148	-0.111017	13.2159	0.00027758	0.00134629
CYP2E1	chr10	133520406	133561220	+	1.17958	2.11752	13.2129	0.000278031	0.00134801
DGUOK-AS1	chr2	73947642	73981441	-	0.669465	-0.0795779	13.2104	0.0002784	0.00134956
NETO2	chr16	47077703	47143997	-	0.820419	3.45597	13.2075	0.000278837	0.00135144
MAGEA3	chrX	152698752	152702347	+	2.99276	4.0902	13.1957	0.000280594	0.00135853
ALX3	chr1	110059994	110070700	-	4.16951	-2.26897	13.1776	0.000283317	0.00137076
LINC01511	chr5	1363582	1380067	-	2.20257	-1.85672	13.173	0.000284012	0.0013734
GS1-393G12.13	chr8	144353228	144355609	-	0.666024	-1.79453	13.1487	0.000287722	0.00138989
MTMR11	chr1	149928651	149936898	-	0.591279	5.48808	13.1481	0.000287817	0.0013901
HIST2H4A	chr1	149832659	149839767	+	0.829986	2.70908	13.1457	0.000288185	0.0013914
RP11-409C19.2	chr8	66984135	66986187	-	1.29999	-3.69456	13.145	0.000288291	0.00139167
LINC01269	chr14	70698698	70712153	+	1.28268	-1.80888	13.1428	0.000288633	0.00139308
RP11-385F7.1	chr6	47477243	47477572	-	0.683533	-1.49948	13.1418	0.000288783	0.00139356
RP11-797A18.6	chr15	77067654	77068325	-	0.659397	-0.703989	13.1349	0.000289841	0.00139842
EIF4HP2	chr22	30902219	30902781	+	0.663016	-2.50924	13.134	0.000289978	0.00139883
CYP2J2	chr1	59893308	59926790	-	0.802488	3.20103	13.1191	0.000292295	0.00140787
TPPP3	chr16	67389809	67393535	-	0.958829	5.16977	13.1096	0.000293787	0.00141377
AIRE	chr21	44285838	44298648	+	1.48101	-1.32739	13.1048	0.000294538	0.00141689
CTD-3064M3.4	chr8	141389939	141392574	-	1.28158	-3.84631	13.0817	0.000298196	0.00143299
RN7SL832P	chr2	10690344	10692099	+	0.660547	-1.25517	13.0685	0.000300305	0.00144263
RP11-575G13.2	chr12	100578744	100580197	+	0.886156	-3.38972	13.0621	0.000301331	0.00144681
VSIG10L	chr19	51331536	51342124	-	0.990414	2.89552	13.0589	0.000301843	0.00144901
POTEKP	chr2	131591752	131627266	+	2.08287	-2.08493	13.0548	0.000302504	0.00145169
RP11-218C14.8	chr20	23631826	23632316	-	0.659895	-2.56856	13.0515	0.000303034	0.00145372
NHLRC1	chr6	18121419	18122606	-	0.839948	0.610121	13.0454	0.000304036	0.00145803
DNAJC3-AS1	chr13	95648733	95676925	-	0.627537	1.55411	13.0384	0.000305169	0.00146245
CDT1	chr16	88803213	88809258	+	0.580757	4.91066	13.037	0.000305399	0.00146305
TRIM15	chr6	30163206	30172696	+	0.737922	3.97808	13.0313	0.000306334	0.00146727
SLC25A5P5	chr7	32471513	32472409	+	1.09167	-2.02938	13.0308	0.000306415	0.00146741
GS1-204I12.4	chr1	185655002	185657168	+	1.54197	-3.84916	13.0291	0.000306683	0.00146844
DRICH1	chr22	23608452	23632321	-	0.76981	-2.60283	13.0244	0.000307457	0.00147112
MRPS17P1	chr1	44988705	44991834	-	1.3642	-3.56773	13.0116	0.000309573	0.00148048
IL22RA1	chr1	24119771	24143121	-	0.777065	4.62933	12.9846	0.00031407	0.00149837
RP11-435O5.7	chr9	95406990	95407662	-	0.745887	-2.62437	12.9816	0.000314573	0.00150025
TMEM191A	chr22	20701114	20704606	+	0.628573	1.37104	12.9676	0.000316922	0.00151016
TRBV29OR9-2	chr9	33786221	33786828	+	0.939964	-3.30695	12.9471	0.000320423	0.00152475
TNS4	chr17	40475828	40501597	-	1.3776	7.26261	12.9462	0.000320567	0.00152517
SPATA31A1	chr9	39355669	39361959	+	3.08449	-3.3912	12.9369	0.000322165	0.00153251
RP13-401N8.3	chr20	25835985	25836832	-	0.904962	-2.50717	12.907	0.000327347	0.00155476
PPARG	chr3	12287368	12434356	+	0.643749	4.94888	12.8959	0.000329309	0.00156301
FAM183A	chr1	43145153	43156396	+	1.47925	-2.42401	12.8959	0.000329311	0.00156301
GAL3ST1	chr22	30554635	30574587	-	0.791199	3.22662	12.8955	0.000329366	0.00156301
RP11-102M11.2	chr3	136752630	136755780	+	0.919911	-3.19063	12.8904	0.000330278	0.0015668
RP11-169K16.6	chr1	15792796	15793285	+	0.850467	-3.6422	12.8874	0.000330799	0.00156889
SPATA25	chr20	45886489	45887635	-	0.695912	-1.40395	12.8872	0.000330832	0.00156889
STOX1	chr10	68827541	68895432	+	0.749919	1.92476	12.8856	0.000331117	0.00156997
SAGE1	chrX	135889205	135913061	+	3.83776	-0.254096	12.8671	0.000334409	0.00158423
TLL2	chr10	96364606	96513918	-	0.83999	1.0017	12.8631	0.000335122	0.00158679
BLACAT1	chr1	205434886	205437879	-	0.921313	2.14906	12.8601	0.00033567	0.00158884
DSG2	chr18	31498043	31549008	+	0.604171	8.33441	12.8578	0.000336074	0.00159021
FAM221B	chr9	35816391	35828747	-	0.950518	-2.69834	12.8572	0.000336175	0.00159042
EPHA1	chr7	143390289	143408892	-	0.610379	4.86171	12.8513	0.000337251	0.00159524
RP11-964E11.2	chr14	36647083	36658801	-	2.39074	-3.06928	12.8476	0.00033792	0.00159758
CTD-2162K18.4	chr19	36773153	36777078	+	1.10808	-1.92087	12.8345	0.000340289	0.00160851
RP11-973H7.1	chr18	12774651	12775923	-	1.33797	-2.2287	12.8237	0.000342262	0.00161564
KRT15	chr17	41513743	41522529	-	1.30755	3.97778	12.8206	0.000342815	0.00161769
GLB1L3	chr11	134274245	134319564	+	1.42516	-1.20872	12.8091	0.000344937	0.00162694
HENMT1	chr1	108648290	108661526	-	0.588159	3.21258	12.7986	0.000346871	0.00163461
PAK6	chr15	40217428	40277486	+	0.752123	3.10502	12.7959	0.000347372	0.00163642
GAGE13	chrX	49331616	49338952	+	7.32921	-0.771982	12.7773	0.000350855	0.00165086
RP11-499F3.2	chr15	81660482	81871125	-	1.81402	-2.75958	12.7705	0.000352121	0.00165654
SUN3	chr7	47987148	48029119	-	1.89554	-2.65208	12.7606	0.000353988	0.00166334
HSD11B2	chr16	67430652	67437553	+	0.713757	5.03731	12.7591	0.000354279	0.00166443
NLRP5	chr19	55999726	56061813	+	2.29551	-3.67631	12.7503	0.000355961	0.00167176
CYP2B6	chr19	40991299	41018398	+	1.42457	3.91045	12.7481	0.000356374	0.00167313
CEACAM16	chr19	44699151	44710714	+	1.55532	-2.90507	12.7378	0.000358348	0.00168155
RP11-1109M24.5	chr17	22266425	22288133	+	2.51841	-3.6693	12.7276	0.000360307	0.00168903
RP11-307P5.1	chr6	147660703	147953937	+	1.07187	-2.95511	12.7151	0.000362711	0.00169886
RP11-874J12.4	chr18	3653410	3656282	+	1.32968	-1.98381	12.7144	0.000362845	0.00169902
RP11-120K24.3	chr13	112964835	112966131	-	0.982805	-1.38668	12.7108	0.000363546	0.00170191
RP4-539M6.14	chr22	30475364	30492804	+	1.73178	-3.42272	12.7064	0.000364405	0.00170564
DNAH6	chr2	84516455	84819589	+	0.784949	1.24737	12.6975	0.000366138	0.00171173
POTEF	chr2	130073535	130129222	-	1.84275	0.114301	12.6896	0.000367699	0.00171845
KARSP2	chr13	113130416	113132054	+	1.49937	-3.17893	12.6794	0.000369716	0.00172613
RP11-338N10.2	chr1	7698303	7698872	-	1.29825	-4.39369	12.6646	0.000372653	0.00173867
RP11-1223D19.1	chr2	110231106	110266559	+	1.399	-1.47443	12.6624	0.000373074	0.00174034
RP11-731D1.4	chr4	151333775	151353224	-	0.886423	-3.47596	12.6612	0.000373329	0.00174124
SAPCD1-AS1	chr6	31764310	31765588	-	0.78703	-1.08296	12.6465	0.000376278	0.0017544
NUDT8	chr11	67627938	67629930	-	0.589655	3.29058	12.6351	0.000378581	0.00176336
CTD-3193O13.11	chr19	7870561	7871296	+	1.84876	-2.1673	12.6347	0.000378659	0.00176343
PEX1	chr7	92487020	92528531	-	0.586516	4.93064	12.6343	0.000378732	0.00176347
TRPM2-AS	chr21	44414588	44425272	-	1.01762	1.2333	12.6256	0.000380509	0.00177056
LINC00941	chr12	30795681	30802711	+	1.16532	1.27257	12.6095	0.000383798	0.00178496
DPPA2	chr3	109293788	109316517	-	3.20407	-2.8511	12.6	0.000385739	0.00179258
LINC00184	chr1	234629311	234634780	+	1.06451	-3.10318	12.586	0.000388645	0.00180448
LGALS8-AS1	chr1	236523052	236524508	-	0.69415	-2.47012	12.5817	0.000389532	0.0018083
MGAT4EP	chr1	202820266	202827225	+	1.19094	-3.31965	12.5772	0.000390485	0.00181241
LINC01446	chr7	53655509	53811931	-	3.09766	-1.74922	12.5676	0.000392502	0.00182086
LINC01270	chr20	50292720	50314922	+	0.819326	-0.106301	12.5613	0.000393811	0.00182632
VIPR1	chr3	42489299	42537573	+	0.800948	3.77923	12.56	0.0003941	0.00182719
GRB14	chr2	164492812	164621848	-	0.880276	1.55174	12.5598	0.000394129	0.00182719
DGCR5	chr22	18970514	19031242	+	1.06521	-0.328957	12.5522	0.000395735	0.00183341
RP11-4K16.2	chr8	119215111	119246848	-	0.816167	-2.55175	12.5482	0.000396581	0.00183702
HIST1H4I	chr6	27138588	27139881	+	0.611498	-0.833789	12.5461	0.000397025	0.00183846
RP11-1136G4.2	chr16	54851640	54852733	-	1.44334	-3.70789	12.5438	0.000397523	0.00184015
RP11-284F21.10	chr1	156641666	156644887	-	0.815693	3.98068	12.5393	0.000398475	0.00184302
RP11-758M4.4	chr8	74798784	74866939	-	2.06924	-1.09567	12.5344	0.00039953	0.00184759
MORC2-AS1	chr22	30922308	30932449	+	0.691165	-2.02779	12.5321	0.000400017	0.00184923
PRR27	chr4	70133616	70176799	+	2.41391	-2.46295	12.5305	0.000400357	0.00185049
RP4-781B1.5	chr20	44746642	44747201	+	1.31699	-2.96505	12.517	0.000403272	0.00186241
LINC01124	chr2	170712451	170714567	-	1.00859	0.434358	12.5114	0.000404478	0.00186767
CTD-2620I22.3	chr19	53007512	53013180	+	1.4541	-2.95725	12.5048	0.000405901	0.00187268
RP11-274M17.1	chr12	74170445	74171830	+	2.53438	-3.76634	12.503	0.000406294	0.00187356
GAGE2A	chrX	49589529	49596827	+	6.87973	-0.178044	12.494	0.000408255	0.00188167
RP3-407E4.4	chr6	63440766	63443580	+	2.6592	-3.15521	12.4916	0.000408796	0.00188353
GCNT1P1	chr20	18420160	18421454	-	1.09856	-3.53987	12.4855	0.00041013	0.0018878
RP11-10J21.2	chr8	141224288	141226947	-	0.647991	-1.73552	12.4765	0.000412096	0.00189527
PTGES2-AS1	chr9	128128529	128130628	+	1.03265	-0.801571	12.4724	0.000412999	0.00189816
PRSS56	chr2	232520463	232525716	+	4.40534	0.141251	12.4487	0.00041828	0.00191989
PNMA3	chrX	153056409	153060467	+	1.42504	0.112311	12.4428	0.000419608	0.0019244
CCNI2	chr5	132747445	132754403	+	0.632823	2.87595	12.4381	0.000420669	0.0019283
ZDHHC11B	chr5	710360	766952	-	0.955948	3.01971	12.4375	0.000420807	0.00192862
SBK1	chr16	28292519	28323849	+	1.00063	3.05116	12.4341	0.000421568	0.0019317
EVX1-AS	chr7	27241429	27247229	-	1.91302	-3.64145	12.4295	0.000422598	0.00193587
LGALS7	chr19	38770971	38773492	-	2.08452	0.080606	12.4243	0.000423777	0.00194063
RP11-1055B8.9	chr17	81345476	81345966	-	0.793005	-2.21884	12.4213	0.000424471	0.00194316
POTEI	chr2	130459455	130509666	-	1.63302	-0.852288	12.4139	0.000426157	0.00194863
RP11-674E16.4	chr3	155742142	155743726	-	0.780149	-3.08242	12.4091	0.000427249	0.0019533
CTD-2325P2.4	chr14	68627166	68628445	-	0.966343	-2.17029	12.4014	0.000429023	0.0019598
RP3-406A7.7	chr6	136335714	136336087	-	0.619274	-0.874665	12.3896	0.000431724	0.00197019
MYOM3	chr1	24056035	24112175	-	1.14581	2.91578	12.3892	0.000431833	0.00197036
RP5-823G15.5	chr20	53453058	53504314	-	1.49809	-2.70143	12.3576	0.000439202	0.00200003
UMODL1	chr21	42062959	42143453	+	1.14506	-2.02731	12.3481	0.000441425	0.0020062
LINC00355	chr13	63986371	64076011	-	3.01488	-1.39467	12.345	0.000442158	0.0020092
CFAP57	chr1	43172149	43254358	+	0.64968	-0.521209	12.3431	0.00044263	0.00201102
GLS2	chr12	56470944	56488414	-	0.805153	1.91023	12.3307	0.00044556	0.00202234
PSMC1P7	chr3	161328924	161330238	-	1.53448	-4.16036	12.3249	0.000446965	0.00202673
LINC01602	chr8	57978358	57984126	+	2.55959	-1.65374	12.3184	0.00044852	0.00203345
RP11-95G17.2	chr6	122643388	122644771	+	1.0865	-4.33815	12.3161	0.000449074	0.00203562
RBP3	chr10	47348371	47357875	+	1.36546	-2.81094	12.3042	0.000451937	0.00204726
ASNSP1	chr8	46579213	46614523	-	4.04398	-3.19605	12.3028	0.000452271	0.00204844
LINC00483	chr17	50761029	50767557	-	1.00955	2.3173	12.2989	0.000453237	0.00205193
GALR2	chr17	76074794	76077541	+	0.790117	-1.87144	12.2927	0.000454735	0.00205806
ERV3-1	chr7	64990809	65006743	-	0.849127	4.78457	12.2906	0.000455256	0.00205995
CRX	chr19	47819779	47843330	+	1.79463	-2.31548	12.2836	0.000456955	0.00206603
KIF4B	chr5	155013755	155018132	+	0.766345	-3.17013	12.2836	0.000456955	0.00206603
ECEL1P2	chr2	232385750	232387457	-	1.53348	-2.59893	12.2832	0.000457048	0.00206603
SCGB1A1	chr11	62405103	62423195	+	3.12143	-2.11704	12.2811	0.000457558	0.00206766
RP11-74C1.2	chr1	151557446	151557940	+	0.708161	-2.53477	12.279	0.000458076	0.00206967
MIR663AHG	chr20	26186920	26251526	-	2.64295	-1.94745	12.2743	0.000459228	0.00207385
ASS1	chr9	130444929	130501274	+	0.780978	7.49317	12.2699	0.000460333	0.00207851
CTD-2571E19.3	chr8	62143311	62144769	-	1.06505	-3.57333	12.2642	0.000461721	0.00208273
ANKRD20A8P	chr2	94811046	94857282	-	2.32326	-2.37253	12.2531	0.000464481	0.00209348
RP11-173M1.5	chr17	27351858	27352584	-	0.72254	-2.88969	12.2512	0.00046495	0.00209526
ZNF280A	chr22	22513736	22520270	-	1.75919	-2.16438	12.2472	0.000465959	0.00209913
HES6	chr2	238238267	238240662	-	0.723782	3.78159	12.2389	0.000468023	0.00210651
RP11-568K15.1	chr1	178006136	178037950	-	0.61942	5.26009	12.2306	0.000470119	0.00211443
AC018641.7	chr7	32456963	32457758	-	1.17923	-2.77385	12.2298	0.00047032	0.00211499
DNAH14	chr1	224896262	225399292	+	0.89913	1.62581	12.2268	0.000471089	0.00211811
QRSL1P1	chr1	168449672	168451211	-	1.52338	-3.65517	12.2212	0.000472498	0.00212238
LINC00665	chr19	36313067	36331718	-	1.04018	4.31939	12.2188	0.000473108	0.00212443
KLK13	chr19	51056206	51065114	-	1.87079	2.75509	12.2082	0.000475793	0.0021351
ATHL1	chr11	289135	296107	+	0.703688	5.04814	12.2079	0.000475882	0.00213515
FAM72C	chr1	143955364	143971965	-	0.719402	1.88402	12.1999	0.000477912	0.00214322
AC004158.3	chr16	72425948	72533892	+	0.708333	-1.97618	12.1917	0.000480015	0.00215148
RP1-63M2.7	chr20	33655701	33656423	-	0.63592	-2.19826	12.1728	0.000484912	0.00217123
HIST1H4H	chr6	26285113	26285509	-	0.783043	-0.0161183	12.1727	0.000484941	0.00217123
RP1-27K12.2	chr6	53561289	53617171	-	2.03803	-1.51468	12.1599	0.000488269	0.00218366
IZUMO1	chr19	48740852	48746909	-	1.03864	-2.20826	12.1588	0.00048857	0.00218466
AZGP1P1	chr7	99980762	99987535	+	1.54156	-3.06365	12.1462	0.000491878	0.00219768
AP000696.2	chr21	36632681	36637033	-	1.36988	-2.84952	12.1421	0.000492973	0.00220186
IGFALS	chr16	1790413	1794971	-	1.54476	2.36405	12.1413	0.00049318	0.00220208
TCP10L2	chr6	167146414	167196913	+	1.63704	-1.8957	12.138	0.000494059	0.00220564
RP11-314A20.2	chr17	4704230	4705529	+	0.75136	-2.63611	12.1286	0.000496541	0.00221402
RP11-713M15.2	chr8	120812219	120813359	+	1.08422	1.39905	12.1285	0.000496573	0.00221402
WNT8B	chr10	100463041	100483744	+	0.957422	-2.04621	12.121	0.000498581	0.00222226
SORD2P	chr15	44825747	44884694	-	0.646147	3.93644	12.097	0.000505043	0.002246
GCNT3	chr15	59594875	59640239	+	0.956263	6.793	12.073	0.000511577	0.00227069
GUCA2A	chr1	42162691	42164718	-	2.15115	-0.00388462	12.0693	0.000512584	0.0022748
AC007128.1	chr7	8262264	8344516	+	0.947806	-0.323232	12.0595	0.000515303	0.00228467
RP5-1184F4.5	chr20	32449755	32453607	+	0.637311	-2.0062	12.0488	0.000518247	0.00229589
CYP51A1P2	chr13	28722386	28724021	-	0.648914	-1.84649	12.0476	0.000518599	0.00229708
RP11-8P13.5	chr12	32820142	32820567	-	0.680392	-1.76754	12.0429	0.000519913	0.0023018
TPTE2P2	chr13	52219344	52334277	-	1.28319	-3.05959	12.0417	0.000520222	0.00230206
RP11-109G23.3	chr4	78773654	78775973	-	1.02861	-3.46171	12.0349	0.000522129	0.00231013
GREB1L	chr18	21242242	21525417	+	1.19699	1.27996	12.0272	0.000524303	0.00231864
VWA7	chr6	31765590	31777294	-	0.612166	2.99804	12.0202	0.000526257	0.00232654
RP3-442L6.4	chr6	49721931	49724007	+	1.83209	-3.89782	12.0069	0.000530051	0.0023419
C2orf72	chr2	231037490	231049719	+	0.738735	4.76537	11.9982	0.000532515	0.00235135
RP11-736N17.10	chr14	103208100	103208876	+	1.17681	-1.52122	11.9978	0.000532631	0.00235135
IL19	chr1	206798870	206842981	+	1.67357	-1.02864	11.9847	0.000536388	0.00236567
RP11-564D11.3	chr10	122879851	122898024	+	0.815946	-1.50474	11.9821	0.000537132	0.00236782
LIPG	chr18	49560699	49599182	+	0.675959	4.80783	11.9777	0.000538415	0.00237272
UNC5CL	chr6	41026911	41039217	-	0.827872	4.83101	11.9768	0.00053868	0.00237351
CBS	chr21	43053191	43076943	-	1.03172	2.65096	11.9554	0.000544898	0.00239824
C3P1	chr19	10037803	10074135	+	1.95826	-0.214543	11.9519	0.000545923	0.00240199
UGT8	chr4	114598455	114678224	+	0.707787	5.19102	11.9479	0.00054709	0.00240484
SEPT3	chr22	41976272	41998221	+	0.97724	2.20225	11.9365	0.00055045	0.00241884
F5	chr1	169514166	169586588	-	1.08878	5.58818	11.9304	0.000552264	0.00242489
RP11-196G18.24	chr1	149845816	149846486	+	0.698278	-0.239257	11.9185	0.000555791	0.00243729
RP13-122B23.8	chr9	137293868	137295721	-	0.642317	-0.242696	11.9067	0.000559328	0.00245163
EFCAB12	chr3	129401321	129428651	-	0.690434	-0.476693	11.8743	0.000569149	0.00248721
PLAC1	chrX	134565838	134764322	-	1.39058	-0.898105	11.8725	0.000569702	0.00248885
LECT1	chr13	52703264	52739812	-	2.06172	-2.42731	11.871	0.000570142	0.00248998
RND1	chr12	48857145	48865898	-	0.687251	3.16082	11.8656	0.000571812	0.0024961
RP11-284F21.7	chr1	156646507	156661424	-	0.760572	2.56689	11.8642	0.000572248	0.00249721
CTD-2649C14.3	chr16	22007480	22008062	-	0.851174	-3.77985	11.8393	0.000579936	0.00252906
CTD-2147F2.2	chr15	97370371	97521811	-	1.84683	-2.1809	11.8244	0.000584609	0.00254545
GDF15	chr19	18374731	18389176	+	0.756179	6.1808	11.824	0.000584728	0.00254545
CYP51A1P1	chr3	82806515	82808021	-	0.95238	-3.08816	11.8171	0.000586903	0.00255236
MSLNL	chr16	769428	783370	-	1.54359	-2.25338	11.8157	0.000587318	0.00255293
POP4	chr19	29604017	29617237	+	0.636289	5.16142	11.8071	0.000590042	0.00256316
MNX1-AS2	chr7	157006307	157007132	+	0.75733	-3.43243	11.8038	0.000591096	0.00256694
RP11-319E16.2	chr12	5315961	5319347	+	1.69896	-2.79545	11.7997	0.000592418	0.00257147
AC005330.2	chr19	1321225	1322846	+	1.08185	-2.81192	11.7938	0.000594273	0.00257871
RP11-1143G9.5	chr12	69326574	69331882	-	1.09628	2.67879	11.7773	0.000599586	0.00259811
AC092669.3	chr2	66383306	66392450	+	0.855144	-3.10234	11.769	0.000602248	0.00260883
RP11-465B22.8	chr1	1169357	1170343	+	0.63197	2.10351	11.7678	0.000602629	0.00261007
CDX2	chr13	27962137	27971139	-	1.08146	5.04426	11.7635	0.000604021	0.00261488
COL9A2	chr1	40300487	40317816	-	0.869172	3.51291	11.7619	0.000604548	0.00261653
CTA-363E6.2	chr16	19343647	19401693	-	1.14208	-0.380952	11.7573	0.000606063	0.00262208
CTC-548K16.1	chr19	14333743	14343916	+	1.00651	-0.931532	11.7421	0.00061102	0.00264105
CALML3	chr10	5524009	5526771	+	2.97165	2.2694	11.7389	0.000612056	0.00264468
CD177	chr19	43353659	43363172	+	1.65897	4.95326	11.7375	0.000612535	0.00264595
RPS10L	chr20	839447	839977	-	0.671123	-2.90623	11.7298	0.000615062	0.00265604
RP11-2E11.5	chr7	130481491	130484392	-	0.769832	-3.23694	11.7242	0.000616929	0.00266162
C1QTNF1-AS1	chr17	79019209	79027655	-	1.27499	-2.45239	11.7167	0.000619415	0.00267068
ZNF492	chr19	22634324	22667670	+	1.3127	-1.20287	11.713	0.000620666	0.00267441
RP11-353N14.4	chr17	79919357	79925462	+	0.84521	0.929651	11.7073	0.000622548	0.00268044
HOXC13-AS	chr12	53935328	53939643	-	2.4048	-2.12441	11.6972	0.000625957	0.00269386
RNF32	chr7	156640281	156677130	+	0.625702	1.23084	11.689	0.000628717	0.0027028
LINC01606	chr8	57142689	57240298	+	1.8862	-2.67459	11.6808	0.000631489	0.00271345
RP1-92O14.3	chr1	43354684	43358658	-	0.609301	-1.0144	11.6786	0.000632235	0.00271624
GAPDHP51	chr1	51707138	51708137	-	1.79626	-3.72098	11.6704	0.000635012	0.0027269
LLNLF-173C4.2	chr19	197310	198066	-	0.904575	2.37369	11.655	0.000640287	0.00274743
CTAG2	chrX	154651972	154653579	-	4.57848	1.51878	11.6449	0.000643771	0.00276067
HNF4A-AS1	chr20	44372746	44395706	-	0.845536	-2.90523	11.6403	0.000645397	0.00276508
LSINCT5	chr5	2712591	2715237	+	1.62373	-4.37222	11.6254	0.000650562	0.00278462
PRR22	chr19	5782960	5784765	-	0.58628	0.468102	11.623	0.000651417	0.00278785
C4orf19	chr4	37453941	37623495	+	0.620098	4.15139	11.6108	0.0006557	0.00280315
ADGRF1	chr6	46997703	47042363	-	1.33634	3.52839	11.6019	0.000658844	0.00281523
CLDN3	chr7	73768997	73770270	-	1.03561	7.05851	11.5996	0.000659647	0.00281785
TMPRSS11A	chr4	67909385	67964140	-	3.2472	1.44192	11.5989	0.000659915	0.00281857
RP4-798A10.7	chr1	16514645	16515754	+	0.759416	-0.0852258	11.5982	0.000660163	0.00281919
MSL3P1	chr2	233865437	233868444	-	0.635479	2.6858	11.5965	0.000660747	0.00282038
OTX2-AS1	chr14	56813183	57152177	+	1.92689	-3.96947	11.582	0.000665933	0.00284077
GTF2IP7	chr7	76090431	76108779	-	1.00506	-1.74706	11.5703	0.000670144	0.00285741
MOGAT3	chr7	101195007	101201021	-	1.14723	2.27875	11.5646	0.000672198	0.00286441
BNIPL	chr1	151036570	151047600	+	1.10881	-0.33381	11.5487	0.000677963	0.00288454
E2F7	chr12	77021247	77065580	-	0.581627	3.33717	11.5379	0.0006819	0.00290031
FUT1	chr19	48748011	48755390	-	0.673337	2.9464	11.536	0.000682631	0.00290262
RP11-153F5.7	chr12	52946614	52947125	-	0.607498	-2.26976	11.5328	0.000683787	0.00290665
RP5-907C10.3	chr7	124742312	124745017	-	1.13781	-3.08014	11.5297	0.000684949	0.0029098
RP11-311F12.1	chr17	19719059	19722428	+	1.12063	-2.82256	11.5193	0.000688758	0.00292285
RP11-247A12.2	chr9	129176771	129210548	+	0.87867	-1.64723	11.519	0.000688874	0.00292289
FAM84B	chr8	126552442	126558393	-	0.580182	6.58477	11.515	0.000690379	0.00292793
CTC-453G23.5	chr19	48118432	48127706	+	0.933285	-3.2112	11.5132	0.000691053	0.00293034
MCF2L-AS1	chr13	112967484	112968824	-	0.795262	0.818648	11.5107	0.000691961	0.00293375
VN1R81P	chr19	21123817	21124188	+	0.588597	-1.5807	11.5083	0.000692873	0.00293716
CSMD3	chr8	112222928	113437099	-	1.84424	-1.96347	11.4954	0.000697672	0.00295479
HIST1H3G	chr6	26269405	26271815	-	0.93366	0.118397	11.4932	0.000698528	0.00295752
CCL20	chr2	227813842	227817564	+	1.1383	5.65339	11.4855	0.000701402	0.00296923
AL163953.2	chr14	53599832	53614026	-	1.24992	-2.54669	11.4817	0.00070285	0.00297491
RP11-466F5.6	chr1	165698750	165709968	+	1.21381	-3.58966	11.4531	0.000713732	0.00301315
AC104981.1	chr17	77777090	77777464	-	0.980935	-3.07931	11.4398	0.000718859	0.00303156
ODAM	chr4	70196496	70204576	+	1.31933	2.94901	11.4351	0.000720715	0.00303708
EFNA3	chr1	155078872	155087538	+	0.863577	4.09769	11.4336	0.000721296	0.00303907
DUSP15	chr20	31847637	31870747	-	0.910472	0.953256	11.4126	0.00072948	0.00306795
AIFM3	chr22	20965108	20981360	+	0.774953	0.572293	11.4107	0.00073023	0.00307064
TSPEAR	chr21	44497892	44711580	-	1.11459	0.0768061	11.4082	0.000731195	0.00307377
HNRNPA1P54	chr1	179447602	179457315	-	1.19776	-1.37484	11.4065	0.000731889	0.00307575
SULT2B1	chr19	48552075	48599425	+	1.0792	3.61517	11.4059	0.000732127	0.00307629
OLFM4	chr13	53028759	53052057	+	1.60251	10.8938	11.4043	0.000732743	0.00307841
RP11-503N18.1	chr4	2418974	2450360	+	0.781642	-1.50198	11.4014	0.000733904	0.00308188
AQP2	chr12	49950741	49958881	+	1.94943	2.80847	11.3891	0.000738762	0.00309819
LINC01296	chr14	19284653	19337730	-	0.83646	3.36928	11.3881	0.000739155	0.00309924
BNIP3P39	chr19	23798924	23799477	-	1.33519	-3.79272	11.3823	0.000741466	0.00310799
C20orf202	chr20	1203454	1208274	+	0.692361	-0.508847	11.3701	0.000746364	0.00312662
RP13-415G19.2	chr17	41665566	41668031	+	0.914991	-3.14581	11.3628	0.000749301	0.00313799
SAMD5	chr6	147508927	147737547	+	0.751607	5.01456	11.358	0.000751243	0.00314422
HOXC6	chr12	53990624	54030823	+	0.781479	2.23092	11.3569	0.0007517	0.00314566
TDGP1	chr12	25803298	25804526	+	0.721826	-3.47879	11.3559	0.000752078	0.00314677
AC011298.2	chr2	240686334	240690414	+	1.30547	-0.617136	11.355	0.000752447	0.00314736
CCDC67	chr11	93329971	93438487	+	1.44314	-2.48329	11.3497	0.000754589	0.00315489
RP11-434I12.3	chr8	73358913	73362788	+	1.63038	-3.45129	11.3493	0.000754758	0.00315512
FGF17	chr8	22042398	22048809	+	0.977325	-2.62112	11.3448	0.000756577	0.00316096
HUS1B	chr6	655939	656963	-	0.606458	-3.07679	11.3443	0.000756818	0.00316115
SERPINA10	chr14	94280455	94293271	-	1.92901	0.168805	11.3404	0.000758403	0.00316702
AC097374.2	chr2	94867486	94947341	-	2.36257	-1.96164	11.3384	0.0007592	0.00316939
CSAG3	chrX	152753921	152760222	+	2.0864	1.13529	11.3303	0.000762537	0.00318141
AC007009.1	chr7	8262233	8262821	+	0.766556	0.0704791	11.3281	0.000763428	0.00318417
UGT1A3	chr2	233729108	233773299	+	1.70569	-1.04273	11.3261	0.000764266	0.0031867
APOA2	chr1	161222292	161223631	-	4.51757	2.54105	11.3203	0.000766654	0.00319594
ZFP42	chr4	187995771	188005050	+	3.5138	-0.95827	11.3201	0.000766712	0.00319594
RP11-145G20.1	chr4	96310701	96818864	+	2.63308	-3.45143	11.308	0.000771728	0.00321395
MIP	chr12	56449502	56469166	-	0.7106	-2.84948	11.3063	0.000772453	0.00321648
RP11-44F14.1	chr16	53364982	53373083	-	0.929342	-2.8102	11.2929	0.000778051	0.00323737
CH507-236L23.3	chr21	7135334	7137789	-	0.768059	-2.48375	11.2917	0.00077855	0.0032375
CH507-39O4.3	chr21	5703182	5705637	-	0.768059	-2.48375	11.2917	0.00077855	0.0032375
CH507-338C24.3	chr21	8101251	8103706	-	0.768059	-2.48375	11.2917	0.00077855	0.0032375
SERPINH1P1	chr9	34318407	34319655	+	0.738917	-3.05201	11.2838	0.000781882	0.00324703
GJB1	chrX	71215194	71225516	+	0.80971	5.26787	11.2795	0.000783677	0.00325297
DRD5P2	chr1	144274892	144277993	-	2.3466	-3.04667	11.2554	0.000793932	0.00328962
RP11-352D13.6	chr15	69278328	69298763	-	1.18513	-2.87815	11.2506	0.000795965	0.00329608
PANX3	chr11	124611490	124620356	+	2.13864	-4.08984	11.2495	0.000796451	0.0032971
FOXQ1	chr6	1312473	1314187	+	0.742676	5.75021	11.2416	0.000799853	0.0033102
RP13-890H12.2	chr17	45168800	45171584	-	0.735427	0.0622261	11.2406	0.000800253	0.00331086
TINCR	chr19	5558167	5568034	-	1.14734	-0.0308197	11.2372	0.000801729	0.00331647
LINC01529	chr19	35788876	35797885	-	1.54121	-3.88162	11.2362	0.000802174	0.00331733
AC093620.5	chr7	5419827	5420767	+	0.649677	-1.90436	11.2332	0.000803483	0.00332175
KRT13	chr17	41500981	41505705	-	3.34447	7.92996	11.2245	0.000807224	0.00333572
AC098973.1	chr3	27830888	27834136	-	1.58529	-3.91705	11.2096	0.000813748	0.00336018
RP11-771K4.1	chr12	31363481	31369301	-	1.05169	-2.6991	11.2067	0.000815022	0.00336444
LINC00605	chr14	103187221	103189028	-	1.1301	-1.28206	11.1988	0.000818488	0.00337673
ADORA2B	chr17	15944917	15975746	+	0.680973	2.22267	11.197	0.000819307	0.00337911
RP11-766N7.3	chr12	64883394	64977522	+	1.0424	-3.01331	11.1918	0.000821595	0.00338754
CEACAM22P	chr19	44537058	44620821	-	1.0183	-3.28855	11.1851	0.000824553	0.00339721
SLC22A18	chr11	2899721	2925246	+	0.636496	5.2875	11.184	0.000825041	0.00339802
GCGR	chr17	81804132	81814013	+	1.44666	-2.48718	11.1816	0.00082613	0.00340028
DCST2	chr1	155018520	155033781	-	0.599116	-0.949819	11.1717	0.000830562	0.0034174
RP3-412A9.17	chr22	31051630	31068327	+	0.900034	-1.29095	11.1634	0.00083428	0.00343153
SPTBN2	chr11	66685248	66729226	-	0.78499	5.37627	11.1632	0.000834368	0.00343153
AC010894.3	chr2	174487389	174488386	+	0.598857	-1.4706	11.1539	0.000838553	0.00344669
TBX3	chr12	114670254	114684164	-	0.655796	4.71035	11.1512	0.000839786	0.00345125
ICAM4	chr19	10286967	10288522	+	1.14663	0.386777	11.1492	0.000840689	0.00345445
RPL3P7	chr6	108004357	108005568	-	0.705464	-1.54836	11.1383	0.000845619	0.00347162
LINC00202-2	chr10	26647986	26653454	+	2.16109	-2.51299	11.1377	0.000845918	0.00347233
HOXC9	chr12	53994895	54003337	+	0.922387	1.52337	11.1358	0.000846789	0.00347488
RNF39	chr6	30070266	30075887	-	0.777129	2.76708	11.1339	0.000847622	0.00347727
LA16c-60H5.7	chr22	15854195	15855243	-	0.837265	-0.56002	11.1318	0.000848602	0.00348077
SLC38A3	chr3	50205246	50221486	+	1.51964	1.06684	11.1215	0.000853328	0.00349861
DMRT3	chr9	976964	991731	+	1.32824	-2.14212	11.1172	0.000855309	0.00350569
RP11-80H5.5	chr10	89644603	89645223	-	0.611286	0.583697	11.1168	0.000855483	0.00350589
RNF225	chr19	58396090	58397079	+	1.65596	-2.48159	11.1115	0.000857947	0.00351495
AC024937.6	chr3	195937243	195938739	+	0.609445	-0.63755	11.1071	0.000859959	0.00352215
RP11-353N14.2	chr17	79823452	79827704	+	1.01398	-1.3681	11.1063	0.000860339	0.00352319
KB-1732A1.1	chr8	102805517	102809971	+	0.610148	0.721324	11.0895	0.000868166	0.00355154
TAF1L	chr9	32629454	32635669	-	0.984909	-3.13106	11.0834	0.000871056	0.00356181
GSDMB	chr17	39904595	39919854	-	0.793493	6.10485	11.0767	0.000874171	0.0035721
TOR4A	chr9	137277749	137282641	+	0.59373	6.39874	11.0737	0.000875631	0.00357577
RP11-206P5.2	chr4	25504997	25506675	+	1.32338	-3.23861	11.0721	0.000876387	0.00357833
GAD1	chr2	170813213	170861151	+	1.10861	2.18053	11.0707	0.00087702	0.00357986
MFSD2A	chr1	39955112	39969968	+	0.619749	3.42161	11.0631	0.000880647	0.00359216
APOA1	chr11	116835751	116837950	-	1.89653	4.76781	11.0452	0.000889149	0.0036235
KREMEN2	chr16	2963944	2968383	+	0.922545	0.604051	11.0359	0.000893642	0.00364021
EEF1A1P24	chr3	39358545	39359922	+	1.2051	-3.72512	11.0319	0.000895559	0.00364534
RP11-150C16.1	chr12	58920639	59064238	+	0.860007	-3.55197	11.0208	0.000900965	0.00366519
C6orf183	chr6	109165833	109271014	+	1.1504	0.997169	11.0087	0.000906867	0.0036865
ENTPD2	chr9	137048098	137054045	-	0.83824	4.66055	11.0026	0.000909856	0.00369648
ACTBP13	chr3	49873347	49877980	-	1.08583	-1.51115	10.9976	0.000912298	0.00370477
AC104667.3	chr2	237591020	237595981	+	0.665101	-0.974012	10.9932	0.000914461	0.00371138
SCRT1	chr8	144330565	144336281	-	1.80509	-1.68696	10.9874	0.000917353	0.00372094
SLX1A	chr16	30193887	30197561	+	0.587187	4.85505	10.9816	0.000920228	0.00373096
RP11-227H15.5	chr10	69265342	69268148	-	0.976127	-3.74622	10.9773	0.000922338	0.00373788
RP3-425C14.5	chr6	122471923	122484161	+	0.684187	-1.87481	10.975	0.000923494	0.00374147
ZNRF3	chr22	28883592	29057487	+	0.624212	4.86464	10.9667	0.000927662	0.00375305
AC006548.28	chr22	16950086	17034417	-	0.840655	-0.309233	10.9551	0.000933454	0.00377356
RP11-499E14.1	chr2	97094935	97097433	+	0.992557	-3.22993	10.941	0.000940606	0.00380025
XXbac-BPG249D20.9	chr6	30516266	30519217	+	0.651535	-2.80038	10.9207	0.000950972	0.00383654
CITED4	chr1	40861051	40862366	-	0.685584	4.2224	10.9103	0.000956313	0.00385697
ATP12A	chr13	24680411	24712493	+	1.8897	-1.06473	10.9049	0.000959127	0.0038655
RP4-549L20.3	chr1	100894928	100895356	+	1.48141	-3.02615	10.8937	0.000964912	0.00388487
RPL9P32	chr19	29956369	29956988	-	1.01428	-2.84193	10.885	0.000969456	0.00390203
C1orf195	chr1	15164344	15171317	-	0.742898	-3.43129	10.8729	0.000975811	0.00392135
RP11-84A14.4	chr1	9942923	9949974	+	0.708093	-3.46507	10.8659	0.000979511	0.00393451
HIST1H3H	chr6	27810064	27811300	+	0.710578	1.76327	10.8639	0.000980565	0.00393817
C19orf67	chr19	14081619	14085875	-	0.851645	-3.26978	10.8589	0.000983225	0.00394656
RP5-1185I7.1	chr7	77990384	77995171	+	1.0773	-1.46809	10.8423	0.000992059	0.00397842
TSPEAR-AS1	chr21	44506807	44516575	+	0.955578	-0.0267133	10.8407	0.000992913	0.00397969
HMX3	chr10	123135962	123137741	+	2.28186	-1.28833	10.8213	0.0010034	0.00401652
CT45A10	chrX	135881063	135889086	-	4.41658	-1.367	10.8191	0.00100461	0.00401989
BARX2	chr11	129375940	129452279	+	0.858747	3.28759	10.8117	0.00100862	0.0040345
RP11-1099M24.9	chr17	8013327	8016378	-	1.10895	-3.8836	10.8032	0.00101324	0.00405177
PLSCR2	chr3	146391421	146495991	-	0.880008	-2.86739	10.8023	0.00101373	0.00405266
RP11-383J24.1	chr8	124271683	124277584	+	1.53755	-3.09915	10.8016	0.00101412	0.00405296
RP11-445N18.7	chr10	45147394	45171389	+	1.40034	-3.59947	10.8008	0.00101458	0.00405422
RP11-49C9.2	chrX	150114378	150116520	+	0.796603	-3.17294	10.7961	0.00101714	0.00406387
RP11-96C21.2	chr15	70570958	70586606	-	0.912594	-2.97126	10.7954	0.00101754	0.00406488
RP11-573D15.2	chr3	186810880	186825521	-	0.652215	-2.97536	10.7922	0.00101931	0.00407018
AC108676.1	chr3	194496317	194501503	-	1.08728	-0.313561	10.7826	0.00102459	0.0040895
SHROOM2	chrX	9786456	9949443	+	0.820819	3.14678	10.7775	0.00102742	0.00409668
RP11-21B23.2	chr16	50390916	50395133	-	3.37072	-2.56855	10.7674	0.00103305	0.00411619
RP11-104J23.1	chr17	36001419	36011618	+	1.0363	-2.67893	10.7668	0.00103339	0.00411682
RP11-713M15.1	chr8	120761253	120776832	+	1.16805	-3.08617	10.7665	0.00103351	0.00411682
RP3-393E18.2	chr6	159586955	159589169	-	0.787317	-2.43362	10.7605	0.00103691	0.00412918
CTD-2384A14.1	chr14	28830244	28968400	+	3.09337	-3.00133	10.7584	0.00103806	0.00413256
RP11-382D12.2	chr1	184385753	184386704	-	0.733728	-2.94803	10.7512	0.00104214	0.00414641
AC005532.5	chr7	7255154	7277779	+	1.28243	-1.66838	10.7455	0.00104531	0.00415725
GIPR	chr19	45668244	45683724	+	0.713028	0.760901	10.7446	0.00104586	0.00415824
CITF22-49E9.3	chr22	49933198	49934074	-	0.81267	-1.86166	10.7376	0.00104982	0.00417337
RP11-638F5.2	chr12	131235511	131237523	+	1.51547	-1.31064	10.7332	0.00105231	0.0041821
DUX4L26	chr3	75668931	75670185	+	1.06161	-3.47789	10.7283	0.00105508	0.0041913
NPFFR2	chr4	72031804	72148067	+	1.64164	-1.68226	10.7217	0.00105886	0.00420392
HIST2H3D	chr1	149813271	149813681	-	0.836728	-2.43902	10.7164	0.0010619	0.00421538
C10orf67	chr10	23267195	23344845	-	1.14259	-3.08002	10.7087	0.00106634	0.00422996
TCTE1	chr6	44278743	44297688	-	0.979958	-2.73122	10.7072	0.00106719	0.00423152
CPSF1P1	chr22	32269381	32273110	+	0.997305	0.907583	10.7056	0.00106813	0.00423466
RP11-579D7.4	chr12	48789147	48790535	+	0.653968	-1.46579	10.7045	0.00106875	0.00423649
MACC1	chr7	20134655	20217404	-	0.587242	6.14445	10.7001	0.00107132	0.00424365
KRT19	chr17	41523617	41528308	-	0.71035	9.77949	10.6968	0.00107322	0.00424936
CTD-2555A7.2	chr16	89046172	89052965	-	0.946726	-2.11461	10.6875	0.0010786	0.00426883
LINC00870	chr3	72151257	72174332	+	0.822597	-1.9371	10.6812	0.00108231	0.00428166
RP11-305L7.1	chr9	91104957	91107304	-	0.703488	-2.8472	10.6711	0.0010882	0.00430067
HIST1H2BJ	chr6	27125897	27132750	-	0.769787	0.739863	10.6706	0.00108854	0.00430141
IL17A	chr6	52186387	52190638	+	1.34928	-1.41062	10.6623	0.00109343	0.00431458
CTC-448F2.6	chr19	30037423	30038156	+	0.603953	-1.03885	10.6615	0.0010939	0.00431523
RP11-165F24.2	chr9	477750	478423	+	0.729119	-2.84273	10.6512	0.00109999	0.00433491
C6orf118	chr6	165279664	165309607	-	1.88441	-3.74378	10.6489	0.00110139	0.0043386
ZIC4	chr3	147386046	147406860	-	2.20385	-1.81674	10.6413	0.00110589	0.00435452
MTND4P26	chr2	120213631	120214989	+	0.621219	-1.98117	10.6372	0.00110835	0.00436229
IL36G	chr2	112973203	112985665	+	1.82578	-2.13452	10.6308	0.00111219	0.00437618
RP11-128M1.1	chr20	2207217	2213151	+	1.02339	-2.96391	10.6255	0.00111536	0.00438615
ALG1L	chr3	125929275	125937039	-	0.888077	0.666996	10.6239	0.00111634	0.00438814
FAR2P4	chr2	131279290	131309068	+	2.06463	-0.744257	10.6229	0.00111695	0.00438992
LRP8	chr1	53242364	53328070	-	0.630884	4.21834	10.6201	0.00111866	0.00439538
DOK7	chr4	3463311	3501473	+	0.832529	1.96834	10.6166	0.00112078	0.00440185
HRK	chr12	116856144	116881441	-	1.09118	-1.11797	10.6153	0.00112158	0.00440436
FGFBP1	chr4	15935569	15938740	-	1.54546	3.01521	10.6063	0.00112704	0.00442081
HCG15	chr6	28986203	28987484	+	0.860573	-2.59591	10.6049	0.00112786	0.00442337
TDGF1	chr3	46574555	46626543	+	1.31679	1.90852	10.5938	0.00113471	0.00444583
AGXT2	chr5	34998101	35048135	-	1.81629	-3.60885	10.5896	0.00113726	0.0044552
FOXE1	chr9	97853254	97856715	+	1.99113	-0.879056	10.5856	0.00113969	0.00446409
C12orf56	chr12	64264762	64391192	-	1.51309	-0.314295	10.5826	0.00114155	0.00446948
FAR2P3	chr2	130690133	130718831	+	1.6353	-3.0366	10.5741	0.00114683	0.0044851
LINC00337	chr1	6236240	6239444	+	0.793088	-1.92175	10.5654	0.00115224	0.00450179
RP5-1121H13.1	chr20	41997131	41999397	-	2.32721	-4.09886	10.5641	0.00115305	0.00450435
F11-AS1	chr4	186286094	186500997	-	1.68501	-1.86728	10.5599	0.00115566	0.00451197
OPRK1	chr8	53225716	53251697	-	1.6061	-2.29845	10.5398	0.0011683	0.00455236
RDM1	chr17	35918066	35930773	-	0.603476	0.159908	10.5271	0.00117634	0.00457854
PHLDA2	chr11	2928273	2929455	-	0.655949	5.84434	10.525	0.00117768	0.00458246
NKX2-8	chr14	36580579	36582607	-	2.36202	-1.77686	10.5245	0.001178	0.00458306
LINC00336	chr6	33586106	33593338	-	0.922588	-2.52619	10.5209	0.0011803	0.00459036
RP11-73M7.1	chr1	31571585	31575573	-	0.725942	-1.29336	10.5208	0.00118037	0.00459036
DMBX1	chr1	46506996	46514226	+	1.119	0.575989	10.5185	0.00118184	0.00459523
KLHL35	chr11	75422394	75430629	-	0.776152	1.90096	10.5179	0.00118221	0.00459523
RP11-565A3.2	chr4	187532878	187672641	-	3.42036	-4.05573	10.5178	0.00118228	0.00459523
ADCY10P1	chr6	41101022	41140835	+	0.665651	0.00404578	10.5137	0.00118495	0.00460493
ASIC3	chr7	151048292	151052756	+	0.596005	-0.156844	10.513	0.00118535	0.00460558
CTD-2514C3.1	chr20	26018832	26020684	+	0.78584	-2.39401	10.5054	0.00119027	0.00462044
PTPRU	chr1	29236516	29326813	+	0.728322	5.49382	10.5036	0.00119145	0.00462437
RP11-867G23.8	chr11	66347950	66364804	+	0.600446	1.65395	10.502	0.00119247	0.00462641
LINC01091	chr4	123650267	123930406	+	0.648807	-0.377865	10.5008	0.00119325	0.00462876
RP5-836N17.4	chr20	32116171	32116629	+	0.650522	-2.93676	10.4906	0.00119985	0.00464916
NHLH1	chr1	160367067	160372848	+	0.598534	-2.1537	10.4893	0.00120068	0.00465091
THPO	chr3	184371935	184378144	-	1.20505	-0.179148	10.4815	0.00120573	0.00466935
RNF182	chr6	13924446	13980302	+	1.72594	0.529059	10.4728	0.00121148	0.00468766
RP11-378A13.2	chr2	218398743	218399219	-	0.666133	-1.66662	10.4438	0.00123061	0.00475176
NALCN-AS1	chr13	100708325	101059286	+	1.29518	-3.40818	10.4363	0.00123565	0.00476591
PKMP5	chr6	5972412	5974012	+	1.14096	-3.49586	10.4201	0.00124648	0.00480167
RP3-388N13.5	chr8	93915734	93916682	-	0.944437	-3.71146	10.4192	0.00124712	0.00480345
POU6F2-AS1	chr7	39404598	39406346	-	2.66878	-4.38656	10.4121	0.00125192	0.00481928
FA2H	chr16	74712955	74774831	-	0.639985	5.70792	10.4088	0.00125418	0.00482662
GJA3	chr13	20138255	20161049	-	1.10826	0.746337	10.4044	0.00125714	0.00483602
CCL28	chr5	43376645	43412391	-	0.850152	4.68804	10.3948	0.00126371	0.00485927
RP11-273G15.2	chr8	142981738	143018437	-	0.696268	-0.198906	10.3935	0.00126457	0.0048619
AC034243.1	chr5	138744434	138753309	-	0.982395	-2.77989	10.3883	0.00126814	0.00487291
CYP4F3	chr19	15615617	15662825	+	0.838798	3.8968	10.3847	0.00127063	0.00488114
RP11-255H23.2	chr19	23762944	23833314	+	1.0096	0.697457	10.3844	0.00127082	0.0048812
CT45A3	chrX	135759846	135768191	-	6.24822	0.0857094	10.3825	0.00127212	0.00488552
B3GNT4	chr12	122203543	122208952	+	0.590942	0.401854	10.3571	0.00128975	0.00494294
RP11-318G21.4	chr13	77939162	77944874	-	2.72336	-2.24325	10.349	0.00129545	0.00496409
GJB7	chr6	87282978	87329278	-	1.51261	-0.925825	10.3483	0.00129597	0.00496471
RP11-544M22.8	chr1	161084465	161087571	+	1.00012	-3.53	10.3478	0.00129632	0.00496536
HOXC13	chr12	53938765	53946544	+	1.78547	1.20521	10.3435	0.00129933	0.00497555
RP11-280O1.2	chr1	165476841	165582155	-	1.913	-4.0265	10.3293	0.00130937	0.00501173
OXT	chr20	3071620	3072517	+	0.991543	-1.77301	10.3193	0.00131649	0.00503359
FGL1	chr8	17864380	17910365	-	2.47267	2.57606	10.3176	0.00131771	0.00503755
RP11-245D16.4	chr13	52454775	52455331	-	0.680209	-1.74245	10.3065	0.00132563	0.00506576
RP11-133K1.9	chr15	40258501	40260370	+	0.754483	-3.22114	10.2996	0.00133062	0.00508343
C2orf78	chr2	73784189	73817147	+	1.49949	-4.04462	10.299	0.00133102	0.00508426
NLRP9	chr19	55708432	55738402	-	1.41944	-3.70043	10.2912	0.00133663	0.00510285
MRPL23-AS1	chr11	1983237	1989920	-	1.52882	-1.13278	10.281	0.00134405	0.00512978
SLC45A2	chr5	33944616	33984730	-	1.19441	-2.42986	10.2795	0.00134515	0.00513326
CPHL1P	chr3	149229356	149291800	-	1.28105	-1.97677	10.2684	0.00135329	0.00516008
UGT1A1	chr2	233760248	233773299	+	1.38214	3.26091	10.2521	0.00136527	0.00520024
LINC00857	chr10	80207710	80219657	+	0.590866	2.93573	10.2507	0.00136635	0.00520343
BECN2	chr1	241957767	241959062	+	1.11043	-3.75922	10.2474	0.00136881	0.00521063
TMEM249	chr8	144352219	144354914	-	0.954419	-1.04805	10.2217	0.00138796	0.0052727
PLA2G2F	chr1	20139326	20150386	+	1.3788	0.957916	10.2092	0.00139739	0.00530415
LINC01220	chr14	75294404	75296638	+	0.608573	-2.7766	10.2042	0.00140122	0.0053165
MAGEB2	chrX	30215560	30220089	+	3.15485	0.780794	10.1977	0.00140615	0.00533012
RARA-AS1	chr17	40340867	40343136	-	0.616895	2.21553	10.1861	0.00141501	0.00535784
PDZD3	chr11	119185457	119190223	+	0.896343	1.49026	10.1831	0.00141733	0.0053654
NXF3	chrX	103075810	103093125	-	1.47982	1.59945	10.1784	0.00142094	0.00537809
CDKN2A	chr9	21967753	21995301	-	1.031	4.30948	10.174	0.00142438	0.00538743
MST1P2	chr1	16645622	16650289	+	0.758282	0.822234	10.1427	0.00144876	0.00546994
MAGIX	chrX	49162564	49168483	+	0.625306	2.35341	10.1404	0.00145057	0.00547454
RP4-545L17.12	chr20	1186092	1207036	+	1.22637	-2.98787	10.1261	0.00146184	0.00550579
PLCH1-AS1	chr3	155449184	155457753	+	0.79261	-3.59312	10.1152	0.00147054	0.00553183
bP-21264C1.2	chr21	9325013	9368775	+	0.657428	-0.684375	10.1059	0.00147799	0.00555607
AKR7L	chr1	19265982	19274194	-	0.704346	2.25244	10.0966	0.00148543	0.00557888
HMGB2P1	chr19	1203209	1203842	+	1.05863	-3.42848	10.0921	0.00148909	0.00558874
LHFPL3-AS2	chr7	104894628	104926645	-	1.16288	1.96536	10.0914	0.00148966	0.00559009
MNX1-AS1	chr7	157010805	157016426	+	0.594331	0.841889	10.0908	0.00149012	0.00559106
NANOGP1	chr12	7890801	7900140	+	1.95408	-3.65288	10.0868	0.00149332	0.0055987
MIR3180-4	chr16	15154903	15157020	+	1.00261	-2.15318	10.0662	0.00151011	0.00565306
PGLYRP4	chr1	153330120	153348840	-	1.48544	-1.58344	10.0511	0.00152258	0.00569283
CDC20P1	chr9	87011652	87013151	+	0.901362	-0.237657	10.0481	0.00152503	0.00570046
AURKAPS1	chr1	220266706	220267917	-	0.671837	-2.64013	10.0466	0.00152629	0.00570439
TERT	chr5	1253147	1295069	-	0.985048	1.03502	10.0423	0.0015299	0.00571559
RP11-76E16.2	chr12	42286911	42288560	+	1.04685	-3.53351	10.0399	0.00153183	0.00572127
RP11-108K3.2	chr15	51315841	51321996	+	1.18695	-3.85373	10.0352	0.00153577	0.00573289
LINC01254	chr18	10405133	10414515	-	2.08713	-3.49052	10.031	0.00153925	0.00574431
FZD10	chr12	130162459	130165740	+	1.16998	2.10048	10.029	0.00154093	0.00574827
RP3-439F8.1	chr22	46541495	46548196	+	0.731511	-1.74968	10.0265	0.00154302	0.00575529
HIST1H3E	chr6	26225155	26225565	+	0.665509	-1.63388	10.0192	0.00154916	0.00577587
RP3-342P20.2	chr1	39962680	39963404	+	0.619299	-1.80828	10.0175	0.00155057	0.00578035
TGM1	chr14	24249114	24264432	-	1.36566	3.10059	10.0163	0.00155164	0.00578277
ASIC2	chr17	33013087	34174964	-	1.25021	-1.32963	10.0129	0.0015545	0.00579187
DUXAP9	chr14	19062316	19115270	+	0.838059	2.58869	10.0118	0.00155538	0.00579437
FOXG1	chr14	28765388	28770277	+	1.95884	-2.8374	10.0022	0.0015635	0.00582108
RP11-61L19.1	chr18	9506242	9509726	+	0.598538	-1.99321	10.0011	0.0015645	0.00582368
RP11-98D18.17	chr1	151798054	151798602	+	0.793131	-3.76079	10.0001	0.0015653	0.00582587
ARID3C	chr9	34621379	34628107	-	0.884255	-3.46732	9.99617	0.00156866	0.00583679
KLK2	chr19	50861568	50880567	+	1.27341	-2.96939	9.99397	0.00157054	0.00584144
DSG2-AS1	chr18	31542146	31556911	-	0.666415	-1.78154	9.98959	0.00157427	0.0058514
RP4-621N11.2	chr20	37095785	37097178	+	0.718035	-3.31105	9.98145	0.00158125	0.00587419
AL049794.1	chr20	16551149	16553012	-	0.605525	-2.13058	9.98066	0.00158193	0.00587591
ALX1	chr12	85280107	85301784	+	2.68091	-2.34625	9.96729	0.00159346	0.00591319
RP11-700H6.1	chr17	50934989	50944713	-	0.655667	-1.40633	9.96523	0.00159524	0.00591744
DMP1	chr4	87650307	87664361	+	1.1907	-2.26006	9.95901	0.00160064	0.0059327
HOXD13	chr2	176092891	176095938	+	3.06316	0.135888	9.95113	0.0016075	0.00595655
CEACAM1	chr19	42507304	42561234	-	0.666403	6.4705	9.9441	0.00161365	0.00597534
TMEM99	chr17	40819106	40836274	+	0.60304	3.02188	9.94162	0.00161584	0.00598183
ESRRAP1	chr13	19560013	19561269	-	1.54969	-3.59156	9.93297	0.00162345	0.0060052
GDPD5	chr11	75434640	75525903	-	0.60316	4.18475	9.91907	0.00163575	0.00604586
DOC2A	chr16	30005509	30023270	-	0.858534	0.423055	9.91556	0.00163888	0.00605581
PRAP1	chr10	133309410	133352683	+	1.05588	5.39257	9.91178	0.00164225	0.00606664
ZDHHC20-IT1	chr13	21376977	21377874	-	0.612637	-3.5578	9.90626	0.00164717	0.00608404
KLHL7-AS1	chr7	23101228	23105703	-	0.768233	-0.972287	9.89905	0.00165364	0.00610548
CTC-455F18.3	chr5	170896929	170904461	+	0.996321	-3.6958	9.89134	0.00166058	0.00612621
C5orf38	chr5	2752131	2755397	+	1.32738	0.824538	9.89021	0.0016616	0.00612834
RP11-284F21.9	chr1	156637783	156641004	-	0.865024	1.94102	9.88364	0.00166755	0.00614701
WBSCR27	chr7	73834590	73842535	-	0.751781	1.99013	9.8796	0.00167121	0.00615887
FLJ12825	chr12	54058254	54122234	+	0.839848	-1.43763	9.85957	0.0016895	0.00621802
RP11-1148O4.1	chr17	30068632	30069631	+	0.983979	-3.03867	9.85716	0.00169173	0.00622454
AC005534.8	chr7	156654185	156657693	-	0.741285	-3.36577	9.85041	0.00169794	0.00624326
RDH8	chr19	10013249	10022279	+	1.33869	-2.24744	9.84077	0.00170686	0.0062719
OVOS2	chr12	31111652	31206154	-	0.948265	-0.0520918	9.83796	0.00170947	0.00628065
RP4-694A7.2	chr1	68479129	68483539	+	1.04733	-1.87439	9.83757	0.00170983	0.00628096
RP11-728G15.1	chr12	120629611	120641591	-	1.32533	-2.74773	9.83227	0.00171476	0.00629594
COCH	chr14	30874514	30895065	+	0.926748	3.09242	9.82968	0.00171718	0.00630277
RP11-480G7.2	chr16	46789898	46792040	+	0.885471	-3.47861	9.82955	0.0017173	0.00630277
RP11-568A7.3	chr6	167237508	167240480	-	1.65152	-3.7195	9.82513	0.00172143	0.00631625
LINC01152	chr17	72030291	72041297	+	1.24191	-1.08545	9.82273	0.00172368	0.00632283
SLIT1	chr10	96998038	97185920	-	1.13998	0.974316	9.81642	0.0017296	0.00634119
PRSS27	chr16	2712418	2720551	-	1.14357	1.82734	9.81395	0.00173193	0.00634829
NR5A2	chr1	200027602	200177424	+	0.690024	3.65008	9.81388	0.001732	0.00634829
HSP90AA5P	chr3	184115352	184117898	+	0.846742	-3.45958	9.80611	0.00173933	0.0063735
PROC	chr2	127418427	127429246	+	0.901924	1.54121	9.80492	0.00174046	0.00637678
KB-1568E2.1	chr8	130595299	130655712	-	2.19711	-4.26567	9.79685	0.00174811	0.00640141
TFR2	chr7	100620416	100642779	-	0.850595	2.71361	9.79171	0.00175301	0.00641682
TOX3	chr16	52438005	52547802	-	0.63183	5.17903	9.78966	0.00175495	0.0064231
ADAMTS20	chr12	43353866	43551921	-	2.01805	-2.31425	9.78828	0.00175628	0.0064271
AC010148.1	chr2	234834315	234913384	-	0.714298	-2.13441	9.7768	0.00176728	0.00646138
LINC01006	chr7	156472196	156640654	-	0.654541	2.45077	9.7759	0.00176814	0.00646283
PODXL2	chr3	127629181	127672809	+	0.763392	5.31417	9.7752	0.00176881	0.00646358
RP11-305P22.9	chr20	63009383	63085071	+	1.83852	-2.44651	9.76838	0.00177538	0.00648161
RP4-738P15.1	chr20	25140789	25149258	-	1.64304	-3.02208	9.76519	0.00177847	0.00648862
RP1-29C18.10	chr22	49548681	49556473	+	1.12379	-1.63537	9.7604	0.00178311	0.00650399
RP5-827C21.6	chr1	234372186	234372811	+	0.956912	-3.46844	9.76035	0.00178316	0.00650399
AC009502.4	chr2	219685381	219737937	+	1.26448	-3.23923	9.75833	0.00178512	0.00651031
COL26A1	chr7	101362820	101559024	+	1.26343	-0.50409	9.75257	0.00179072	0.00652644
AC096670.3	chr2	111098345	111115588	-	0.919245	-3.57733	9.74915	0.00179406	0.00653689
SSX4B	chrX	48402078	48411910	-	2.41413	0.165609	9.74322	0.00179986	0.00655477
BTBD7P1	chr10	13156684	13158136	-	1.05585	-2.12494	9.73502	0.0018079	0.00657692
PDX1	chr13	27920020	27926231	+	0.689706	3.93877	9.73489	0.00180803	0.00657692
REN	chr1	204154819	204166322	-	1.33533	-2.69209	9.72502	0.00181777	0.00660851
RAET1K	chr6	149998019	150005157	-	0.638773	-1.27585	9.71642	0.00182629	0.00663425
FKBP4P6	chr9	42384805	42386136	+	1.37842	-3.81425	9.71457	0.00182813	0.00663922
RP11-1C8.5	chr8	103464389	103468985	+	1.02207	-2.07938	9.70508	0.0018376	0.00666661
CH507-39O4.2	chr21	5707004	5709456	-	0.811078	-2.79538	9.70356	0.00183912	0.00667125
RP5-858B6.3	chr1	230874846	230879015	+	0.791181	-3.59572	9.70235	0.00184033	0.00667478
FBXW10	chr17	18744024	18779349	+	0.729608	-1.40207	9.69858	0.00184411	0.00668411
MGC32805	chr5	122436497	122479087	-	1.26221	-0.828034	9.69548	0.00184722	0.00669276
DYDC2	chr10	80344745	80368073	+	1.3615	-1.95338	9.69474	0.00184796	0.00669458
ZBTB46-AS1	chr20	63808076	63816521	+	2.43184	-3.49454	9.6921	0.00185062	0.00670334
RP11-488L18.3	chr1	247183813	247185482	-	0.63887	-2.63043	9.69139	0.00185133	0.00670503
AC005014.5	chr7	16583782	16586757	-	0.9947	-3.10091	9.69051	0.00185222	0.00670736
RP11-333J10.3	chr17	36998598	37000034	+	0.588783	-2.59087	9.69001	0.00185273	0.00670746
RP11-419C5.2	chr16	69976388	69996188	-	0.581157	0.836745	9.68171	0.00186111	0.00673343
HOXC-AS2	chr12	53993810	53996785	-	0.711412	-0.378499	9.68142	0.00186141	0.00673362
AC104534.2	chr19	38820166	38823223	+	1.17465	-0.0351114	9.68064	0.0018622	0.00673558
AC008132.13	chr22	18846811	18861049	+	1.2946	-2.44703	9.67367	0.00186928	0.00675679
SLCO4A1-AS1	chr20	62663019	62666724	-	1.06787	2.20229	9.65906	0.0018842	0.00680266
CFB	chr6	31945650	31952084	+	0.714256	7.818	9.65351	0.0018899	0.00682154
RP5-1033H22.2	chr1	93592199	93605573	+	0.598871	1.35462	9.64762	0.00189597	0.00684079
POU6F2	chr7	38977998	39493095	+	1.57991	0.984962	9.6445	0.00189919	0.00685062
IL17C	chr16	88638591	88640473	+	1.26895	0.279333	9.63605	0.00190795	0.00687745
SELV	chr19	39515113	39520686	+	1.93632	-3.92857	9.63589	0.00190812	0.00687745
AC092168.2	chr2	100822661	100847220	+	0.60464	-2.86302	9.62788	0.00191645	0.00689965
BBOX1-AS1	chr11	27047186	27220113	-	0.702949	0.747063	9.62468	0.00191979	0.00690615
WNT3	chr17	46762506	46833154	-	0.604867	1.23856	9.60472	0.00194078	0.0069689
EFCAB1	chr8	48710789	48735311	-	0.996943	-2.21499	9.60378	0.00194177	0.00697157
RP11-244H18.3	chr14	19637225	19641306	+	2.807	-3.85812	9.60252	0.00194311	0.00697457
RP11-214F16.8	chr13	99498524	99501315	+	0.591138	-2.06356	9.58692	0.00195968	0.0070286
ADGRF4	chr6	47685864	47722021	+	1.0551	1.62473	9.57569	0.0019717	0.00706629
RP3-395M20.7	chr1	2566410	2569888	+	0.72023	-2.52658	9.57349	0.00197407	0.00707289
PRDM12	chr9	130664594	130682981	+	0.664813	-2.29205	9.56632	0.00198179	0.0070978
SERPINC1	chr1	173903804	173917378	-	0.912238	-3.17728	9.56606	0.00198208	0.00709791
DNAI1	chr9	34457414	34520989	+	1.51106	-3.05824	9.55737	0.00199148	0.00712789
XXbac-BPG32J3.20	chr6	31686962	31714072	-	3.63612	-2.46947	9.55672	0.00199219	0.0071286
ALOX12B	chr17	8072636	8087703	-	1.3343	0.32254	9.54139	0.00200889	0.00718372
TFAP2E	chr1	35573370	35595328	+	0.706276	0.0840901	9.53603	0.00201478	0.0072029
CSMD1	chr8	2935353	4994972	-	1.65342	0.217088	9.52879	0.00202273	0.0072211
NCCRP1	chr19	39196961	39201884	+	1.46047	2.83286	9.5204	0.002032	0.00725045
RP1-97J1.2	chr6	111900489	111901851	-	1.85034	-4.1487	9.51559	0.00203733	0.00726433
LINC01305	chr2	174326027	174330643	+	1.54617	-3.94223	9.51366	0.00203948	0.00726782
MYH7B	chr20	34975403	35002437	+	0.984927	1.55396	9.51181	0.00204154	0.00727327
RP11-586K12.1	chr16	32787962	32788944	+	1.16129	-3.52594	9.49746	0.00205756	0.00732
RP11-307A17.2	chrX	35864858	35869631	+	1.9679	-4.10714	9.49711	0.00205796	0.00732049
RP11-757F18.5	chr3	112133423	112135359	+	0.605525	0.384955	9.49661	0.00205852	0.00732105
LYPD3	chr19	43460787	43465660	-	1.22914	4.17636	9.4899	0.00206607	0.0073446
OR8B7P	chr11	124324871	124325789	-	1.89406	-3.71114	9.48731	0.00206898	0.00735307
RP11-725P16.2	chr2	132345616	132347297	-	0.713908	-2.04338	9.48512	0.00207145	0.00735901
ITIH4	chr3	52812975	52831479	-	0.840242	1.65215	9.46706	0.00209195	0.00742708
RGL3	chr19	11384341	11419342	-	0.897572	2.47358	9.4588	0.00210139	0.00745058
CTAG1B	chrX	154617604	154619282	-	3.68593	-0.863245	9.45366	0.00210729	0.00746911
RBP4	chr10	93591687	93601744	-	1.13768	4.15336	9.44544	0.00211675	0.0074969
ATP7B	chr13	51932673	52011494	-	0.600164	5.11188	9.44121	0.00212163	0.00751132
CTC-339O9.1	chr19	53761961	53764199	+	2.14008	-3.00735	9.43807	0.00212527	0.00752131
RP11-492D6.3	chr15	20228620	20277503	-	1.22542	-2.82107	9.43608	0.00212758	0.00752756
RP11-538D16.2	chr1	182062677	182069253	-	1.43101	-3.20816	9.42717	0.00213794	0.0075623
PROM1	chr4	15963076	16084378	-	0.853224	6.36756	9.4259	0.00213942	0.00756507
RP11-538D16.3	chr1	182086551	182090112	+	1.70929	-3.58875	9.41812	0.00214851	0.00759001
ZACN	chr17	76071961	76083666	+	1.13258	2.73673	9.41579	0.00215125	0.00759678
RP11-275I14.4	chr1	226148003	226155071	+	0.595282	-2.41025	9.41243	0.0021552	0.00760781
CFAP45	chr1	159872364	159900163	-	0.587928	-0.51864	9.41057	0.00215738	0.00761356
CHRND	chr2	232525993	232536667	+	1.70692	-3.38562	9.4084	0.00215994	0.00762017
AC114730.3	chr2	241808312	241812016	-	1.02436	-0.647211	9.40126	0.00216837	0.00764651
PLAC8L1	chr5	146084386	146104369	-	0.599817	-3.46276	9.40075	0.00216897	0.0076474
ACTBP7	chr15	43989061	43990184	-	0.820085	-3.10746	9.40058	0.00216917	0.0076474
RP11-661P17.1	chr15	91408708	91605211	+	1.43415	-3.42304	9.3994	0.00217056	0.00765034
UGT1A6	chr2	233691607	233773300	+	1.22735	4.02161	9.39656	0.00217393	0.00765877
RP11-161I6.2	chr18	1883524	2240847	-	1.06419	-2.8668	9.39542	0.00217529	0.00766116
AC020956.3	chr19	41833686	41835950	-	1.73862	-3.15743	9.39507	0.0021757	0.00766163
RP11-348M3.2	chr12	56380361	56382711	-	1.97347	-3.9239	9.38569	0.00218685	0.00769408
CPNE7	chr16	89575768	89597246	+	0.799434	2.52415	9.3599	0.00221784	0.00778337
PANX2	chr22	50170731	50180294	+	0.967546	1.06121	9.359	0.00221893	0.00778529
CTD-2105E13.6	chr19	55352301	55359516	-	1.43208	-1.74164	9.35853	0.0022195	0.00778618
PRB3	chr12	11265924	11269805	-	1.0868	-2.33859	9.35584	0.00222276	0.00779567
NT5DC4	chr2	112721486	112742879	+	0.729012	-2.16846	9.35386	0.00222517	0.00780315
TMEM52	chr1	1917590	1919273	-	0.732914	2.26551	9.34125	0.00224053	0.00784807
LCN15	chr9	136759634	136766255	-	2.11224	-0.76566	9.33746	0.00224517	0.00785936
LY6G6E	chr6	31711771	31714065	-	2.36774	-3.31729	9.33068	0.00225348	0.00788549
RP11-1378G18.1	chr2	87980714	87992858	-	0.792434	-2.28611	9.32767	0.0022572	0.00789748
RPL7P28	chr6	109327175	109327914	-	0.997515	-3.95297	9.32327	0.00226262	0.00791148
CERS6-AS1	chr2	168771953	168786961	-	0.735044	4.04831	9.31837	0.00226868	0.00792866
TP53TG3C	chr16	33193659	33306938	+	2.46539	-3.64533	9.30913	0.00228014	0.0079617
RP6-91H8.5	chr14	71219100	71222724	+	1.17887	-3.27096	9.29999	0.00229156	0.00799551
RP11-341N2.1	chr2	242087351	242088457	-	0.677716	-2.95291	9.29924	0.00229249	0.00799734
RP11-387M24.5	chr6	43074331	43074739	-	0.711152	-3.55214	9.29911	0.00229266	0.00799734
RP11-158L12.6	chr12	125160525	125164918	+	1.44502	-3.08377	9.27757	0.00231977	0.00808275
QPRT	chr16	29679008	29698699	+	0.923943	4.50184	9.27469	0.00232342	0.00809241
SPACA4	chr19	48606743	48607714	+	0.62981	0.0468083	9.27346	0.00232498	0.00809683
TTC25	chr17	41930635	41965651	+	0.659595	-0.668908	9.27319	0.00232533	0.00809703
KISS1	chr1	204190341	204196486	-	0.930157	-0.932564	9.26558	0.00233501	0.00812257
RP4-569M23.4	chr20	47348137	47349142	-	0.666563	-2.34688	9.25794	0.00234477	0.00815041
RP11-626H12.1	chr11	69985876	70015815	+	0.931146	-0.104404	9.2576	0.0023452	0.00815087
FAM134B	chr5	16473038	16617058	-	0.670182	4.86879	9.25342	0.00235056	0.00816542
RP11-286N22.16	chr11	61525708	61526602	-	1.3948	-2.90304	9.24202	0.00236524	0.00821298
ZNF648	chr1	182054570	182061712	-	1.46431	-3.12206	9.24186	0.00236544	0.00821298
SLC7A10	chr19	33208664	33225850	-	1.98862	0.132565	9.24028	0.00236748	0.00821905
PPP2R2C	chr4	6320578	6563600	-	1.23192	1.91479	9.2377	0.00237082	0.00822755
CCDC26	chr8	129351691	129680239	-	1.29556	-3.94897	9.23271	0.00237729	0.00824793
HK2P1	chrX	80571871	80574607	-	0.794047	-3.09777	9.23226	0.00237788	0.00824895
HSPA8P8	chr7	10451311	10452526	+	0.955961	-2.83544	9.22302	0.00238992	0.00828656
RP11-108L7.4	chr10	100980507	100985614	-	0.969752	-3.60345	9.21574	0.00239943	0.00831644
AMN	chr14	102922656	102933596	+	0.668259	5.3849	9.20097	0.00241887	0.00837648
LRRC71	chr1	156920650	156933094	+	0.974589	-3.48643	9.19657	0.00242469	0.00839362
XAGE2	chrX	52369030	52375680	+	3.51432	-2.05394	9.19171	0.00243114	0.00841476
RP11-533E19.3	chr1	179968686	179969506	+	0.61758	-3.52422	9.19144	0.0024315	0.00841496
ZNF716	chr7	57450177	57473546	+	2.81229	-1.58195	9.17966	0.00244719	0.00846398
RP11-322E11.2	chr18	35403996	35406528	-	0.741762	-3.01579	9.17559	0.00245264	0.0084786
PLEKHS1	chr10	113751454	113783429	+	0.787343	5.54451	9.17475	0.00245377	0.00848145
AC073283.4	chr2	47192405	47345074	-	0.716708	-0.999349	9.17307	0.00245602	0.0084871
CYCSP6	chr2	78412793	78413094	-	1.70463	-3.18205	9.16848	0.00246219	0.00850524
GPR37	chr7	124745997	124765627	-	1.02117	0.908937	9.16695	0.00246425	0.00851025
SLC15A1	chr13	98683801	98752654	-	1.37787	2.61656	9.15069	0.00248624	0.00857336
TECTB	chr10	112283735	112305035	+	1.19057	-3.62658	9.14847	0.00248927	0.00858168
RP11-333A23.4	chr8	70471134	70485687	+	1.77679	-1.85337	9.14253	0.00249736	0.00860421
LINC01206	chr3	181952343	182010678	+	1.55232	-2.85702	9.12912	0.00251573	0.00865892
MAGEA2B	chrX	152714586	152718607	+	2.96465	1.39478	9.123	0.00252416	0.00867715
RP11-132F7.2	chr16	52436772	52437474	-	0.649064	-0.853193	9.11978	0.0025286	0.00868811
RP3-523E19.2	chr6	53918974	53920788	-	0.693413	-3.63687	9.11129	0.00254036	0.0087242
NPB	chr17	81900745	81902905	+	0.905902	-0.098998	9.10987	0.00254233	0.00872881
CRNDE	chr16	54918863	54929189	-	0.63145	2.0663	9.10791	0.00254507	0.00873711
RP11-20F18.1	chr2	160849313	160850676	-	1.24657	-2.65458	9.10494	0.00254919	0.00874911
RP11-302L19.3	chr6	170178681	170179660	+	0.831021	-2.66027	9.09368	0.00256495	0.00879338
RMST	chr12	97431653	97565035	+	1.44419	-2.41542	9.08602	0.00257571	0.00882373
RP11-15F12.6	chr18	49013106	49013819	+	0.950585	-2.64827	9.08399	0.00257856	0.00883132
AC068831.10	chr15	91022619	91036611	+	0.588479	-2.40367	9.08007	0.0025841	0.00884809
DNAH12	chr3	57293699	57544344	-	0.804441	-0.572177	9.07948	0.00258494	0.00884987
BX470102.3	chr1	153533603	153535115	+	0.618734	-0.647879	9.07674	0.00258882	0.00885769
RP11-313J2.1	chr10	42331866	42367974	-	0.925707	0.475356	9.07575	0.00259021	0.00886137
SP9	chr2	174334946	174338492	+	2.95674	-0.457938	9.06426	0.00260653	0.00891061
HOTAIR	chr12	53962308	53974956	-	1.08194	1.0159	9.06066	0.00261168	0.0089249
MUC15	chr11	26559033	26572233	-	2.17368	0.35391	9.05311	0.00262249	0.00895643
RP11-282A11.3	chr13	106773623	106774279	-	1.95634	-3.77953	9.05251	0.00262334	0.00895776
RP11-526D8.7	chr9	92882567	92899608	+	1.98933	-3.95551	9.05188	0.00262424	0.00895829
RP5-1009E24.8	chr20	3808357	3812434	+	0.706053	-2.19244	9.04797	0.00262986	0.00897598
FAM182A	chr20	26054655	26086917	+	0.688317	-1.64842	9.0438	0.00263587	0.00899426
C6orf165	chr6	87407983	87464465	+	0.812387	-2.09821	9.03357	0.00265067	0.00903808
AREG	chr4	74445134	74455009	+	0.768607	4.67185	9.02916	0.00265706	0.0090571
IGFBPL1	chr9	38408994	38424447	-	1.23792	0.981834	9.02267	0.00266652	0.0090821
AJ239322.1	chr2	131964731	131979873	-	1.82044	-4.1286	9.01223	0.0026818	0.00912515
MUC3A	chr7	100949555	100968346	+	0.899363	7.98954	9.01178	0.00268244	0.00912623
RP11-57A19.2	chr16	28284885	28292064	-	1.04347	-1.57609	9.00291	0.0026955	0.00916614
AP001476.2	chr21	46037052	46039807	+	1.28484	-2.58776	8.99416	0.00270843	0.00919997
RP11-627G23.1	chr11	134436473	134505661	+	1.13709	0.630086	8.98783	0.00271783	0.00922851
RP11-420A23.1	chr4	128292751	128519394	+	0.610079	-0.346722	8.98573	0.00272096	0.00923686
NPM1P9	chrX	14834476	14835319	-	0.706912	-3.45194	8.98048	0.0027288	0.00925757
AF186192.1	chr8	144698614	144699185	-	1.31402	-3.59063	8.97688	0.00273417	0.00927093
SLC30A3	chr2	27253684	27275817	-	1.06107	-1.00139	8.96849	0.00274675	0.00930645
CNTN5	chr11	99020953	100358885	+	1.18897	-2.27583	8.96243	0.00275587	0.00933482
RP11-401P9.6	chr16	50606076	50613684	-	1.20019	-2.13053	8.95124	0.00277281	0.00938647
LINC01429	chr20	51831797	51862912	-	1.15957	-3.05392	8.94826	0.00277734	0.00939949
FKBP10	chr17	41812680	41823217	+	0.769066	6.87261	8.93477	0.00279792	0.00946107
SPEF1	chr20	3777504	3781448	-	0.777065	-1.72453	8.91791	0.00282387	0.00953487
IL17F	chr6	52236681	52244537	-	1.30575	-2.87095	8.91531	0.0028279	0.00954499
RP11-395B7.2	chr7	100963828	100968124	-	0.994801	0.51911	8.91306	0.00283139	0.00955443
DLG1-AS1	chr3	197298252	197303747	+	0.650204	-2.45813	8.91213	0.00283283	0.00955814
CTA-363E6.3	chr16	19392213	19393468	-	1.06408	-1.62158	8.89587	0.00285817	0.00963423
ANXA9	chr1	150982017	150995634	+	0.6772	2.7839	8.88888	0.00286913	0.00966884
TTLL9	chr20	31870702	31944963	+	0.605483	-1.87223	8.88655	0.00287279	0.00967884
GPR179	chr17	38325530	38343847	-	0.841381	-1.99005	8.86928	0.00290009	0.00975893
FBXO15	chr18	74073353	74147865	-	0.776315	-1.74747	8.86837	0.00290154	0.00976263
PDX1-AS1	chr13	27833444	27921404	-	0.778935	-2.29166	8.84813	0.0029339	0.00985478
MYH6	chr14	23381990	23408277	-	1.58264	-3.47183	8.84507	0.00293881	0.00986888
LINC01198	chr13	46455135	46486506	-	1.8806	-2.33464	8.84332	0.00294164	0.00987599
RP11-366F6.2	chrX	151904431	151913968	-	3.91627	-1.86454	8.84072	0.00294583	0.00988765
LINC00482	chr17	81303771	81309248	-	0.872111	-1.10796	8.8379	0.00295038	0.00989934
HOXC-AS3	chr12	53981509	53985519	-	1.30953	-0.646318	8.8242	0.00297262	0.00996313
C17orf77	chr17	74584679	74594209	+	1.95409	-1.40449	8.81899	0.00298112	0.00998678
PAGE5	chrX	55089045	55288785	+	2.41411	-0.138396	8.81613	0.0029858	0.0100012
RP11-341D18.4	chr13	18253526	18270822	-	1.50064	-2.98353	8.81053	0.00299497	0.0100271
CASC19	chr8	127185635	127203222	-	0.958813	-1.86832	8.80598	0.00300245	0.010047
FOXA3	chr19	45863989	45873797	+	0.605319	4.91342	8.80427	0.00300527	0.0100531
ZNF488	chr10	47365496	47384273	-	0.665729	2.73908	8.79867	0.00301451	0.0100791
RP4-594A5.1	chr7	8303741	8341343	+	0.984454	-1.52474	8.79617	0.00301864	0.0100905
RPS6P8	chr6	73391038	73391767	-	1.03663	-3.64638	8.78788	0.00303239	0.0101267
WFDC5	chr20	45109452	45115172	-	1.98894	-1.96358	8.78651	0.00303467	0.0101331
C20orf195	chr20	63547891	63556708	+	0.678875	-0.0986084	8.78336	0.00303991	0.010147
STRIP2	chr7	129434433	129488399	+	0.598636	3.07124	8.77193	0.00305901	0.0102009
CTD-2206N4.4	chr17	39057019	39113190	+	0.581588	-1.60233	8.76703	0.00306725	0.0102259
LA16c-325D7.2	chr16	2866348	2867618	-	0.631298	-3.36907	8.76507	0.00307055	0.0102332
AC005538.3	chr2	233865496	233867359	-	1.21925	0.917986	8.76161	0.00307637	0.0102514
CACNA1E	chr1	181413102	181808084	+	1.00401	1.76395	8.7608	0.00307774	0.0102547
RP11-390F4.3	chr9	6716495	6727438	+	0.70939	1.37833	8.75864	0.0030814	0.0102644
DRC7	chr16	57694793	57731805	+	1.01284	-2.17603	8.75144	0.00309358	0.0103001
SRGAP3-AS2	chr3	9192493	9194453	+	1.54549	-3.53908	8.74663	0.00310175	0.0103235
RP4-724E13.2	chr7	50866747	51022990	+	0.690122	-3.26407	8.74583	0.0031031	0.0103268
KPNA7	chr7	99173574	99207506	-	0.798029	1.19172	8.73839	0.0031158	0.0103653
SLC30A2	chr1	26037252	26046133	-	1.20451	0.0188978	8.71526	0.00315558	0.0104788
CTD-2561F5.1	chr14	101257332	101278318	+	1.74582	-4.1579	8.70347	0.00317604	0.0105379
SCGB3A1	chr5	180590103	180591540	-	1.48606	2.78933	8.69991	0.00318226	0.0105535
SLC9A3	chr5	473310	524332	-	1.27898	5.20698	8.69461	0.00319153	0.0105779
AC073150.6	chr7	27491682	27492765	-	0.799869	-3.30389	8.6878	0.00320347	0.0106099
C9orf171	chr9	132410043	132573317	+	1.15708	-3.12602	8.67929	0.00321846	0.0106519
RP11-444E17.6	chr6	44273194	44378957	+	0.597723	-2.58262	8.67033	0.00323433	0.0106942
CTD-2331H12.7	chr19	52923382	52924075	+	0.604425	-2.65215	8.66745	0.00323944	0.0107093
SLC38A4	chr12	46764761	46832408	-	1.08818	0.833981	8.65398	0.00326347	0.0107764
HIST1H2BK	chr6	27146418	27146798	-	0.61306	4.05745	8.64775	0.00327465	0.0108069
MEIOB	chr16	1833983	1884294	-	1.40961	-2.92081	8.64521	0.00327921	0.0108207
HIST1H2BL	chr6	27807444	27807931	-	0.641211	-1.81591	8.63309	0.00330112	0.0108826
RP4-760C5.3	chr20	26008791	26010531	-	0.617365	-3.16661	8.6314	0.00330418	0.0108914
RAET1L	chr6	150018334	150025532	-	1.23609	0.417731	8.61896	0.00332682	0.0109556
GALNT5	chr2	157257598	157314211	+	0.740658	5.03902	8.606	0.00335057	0.0110168
AC007099.1	chr2	75524068	75542706	+	2.072	-1.8205	8.59505	0.00337078	0.0110741
ANKRD33	chr12	51887960	51891664	+	1.62605	-1.84148	8.58799	0.00338386	0.0111131
PLA2G4B	chr15	41837775	41848147	+	0.638811	1.31856	8.5824	0.00339429	0.0111447
CBX2	chr17	79778132	79787983	+	0.704669	3.61927	8.58181	0.00339539	0.0111469
RP11-19G24.1	chr17	37140611	37141424	-	0.671081	-3.63387	8.57505	0.00340801	0.0111831
IRX2	chr5	2745845	2751662	-	1.16899	3.8875	8.57034	0.00341683	0.0112054
LINC00574	chr6	169790321	169802873	+	0.771486	-1.03885	8.55538	0.00344503	0.0112912
CTD-2132N18.4	chr17	42038232	42038734	-	0.585738	-2.31001	8.55196	0.00345151	0.011305
ZNF117	chr7	64971776	65006684	-	0.623591	4.59782	8.55187	0.00345167	0.011305
RLBP1	chr15	89209869	89221751	-	1.45918	-2.17212	8.54737	0.00346022	0.0113276
GRAMD4P2	chr22	15749156	15750825	-	1.81848	-3.81802	8.5443	0.00346605	0.0113454
AF186192.6	chr8	144713899	144714845	+	1.0995	-3.52752	8.54109	0.00347217	0.0113587
HOXA10	chr7	27170591	27180261	-	0.851147	4.05903	8.53366	0.00348639	0.0113985
ECHDC3	chr10	11742366	11764070	+	0.872771	2.6243	8.5317	0.00349013	0.0114067
CLIC6	chr21	34669389	34718227	+	0.910765	4.37536	8.52882	0.00349567	0.0114175
ELFN1-AS1	chr7	1738630	1742291	-	0.91698	1.78377	8.5281	0.00349705	0.0114199
GPAA1P2	chr2	110386377	110388163	-	0.800695	0.52864	8.52682	0.00349951	0.0114266
SERPINA12	chr14	94487274	94517844	-	2.07516	-4.24717	8.52307	0.00350673	0.0114461
RP11-15E18.1	chr17	60526293	60550798	+	0.661337	-3.60942	8.52065	0.00351138	0.0114559
HNF1A-AS1	chr12	120941728	120980965	-	0.648793	3.87367	8.51952	0.00351357	0.0114617
RP11-1038A11.3	chr12	5290480	5383653	+	1.6992	-1.58692	8.51807	0.00351636	0.0114694
GPC2	chr7	100169606	100177372	-	0.6763	-0.339095	8.50317	0.00354528	0.0115473
ANKRD45	chr1	173609561	173669862	-	0.867219	-0.705993	8.49038	0.00357029	0.0116139
RP11-443P15.2	chr3	185959943	185980872	+	0.875505	-0.709395	8.48746	0.00357603	0.0116271
AP000251.3	chr21	31559245	31560487	+	1.09673	-2.00469	8.47265	0.00360526	0.0117098
XKRX	chrX	100913445	100929433	-	0.825979	0.247376	8.46415	0.00362214	0.0117591
LINC01146	chr14	88024550	88097619	+	0.932892	-1.02297	8.4601	0.00363021	0.0117784
IRX5	chr16	54930862	54934485	+	0.844024	1.77135	8.45081	0.00364881	0.0118319
GAPDHP68	chr7	9614978	9615985	+	2.00376	-4.17095	8.44753	0.00365539	0.0118504
FAM166A	chr9	137243584	137247770	-	0.628636	-0.877976	8.44576	0.00365896	0.0118606
IGFL4	chr19	46039748	46077118	-	1.32871	-0.487589	8.42451	0.00370197	0.0119767
ZNF385C	chr17	42025576	42065365	-	0.651131	0.357106	8.42443	0.00370213	0.0119767
AC099668.5	chr3	49684480	49684983	-	1.14867	-3.74961	8.42258	0.00370589	0.0119875
RNF183	chr9	113297093	113303376	-	0.808147	1.38301	8.41864	0.00371393	0.0120107
RP11-678K21.2	chr11	91013787	91015299	+	1.87386	-4.24302	8.41261	0.00372627	0.0120436
PROX1-AS1	chr1	213817751	213988508	-	1.26916	-0.411612	8.40969	0.00373227	0.0120588
VWA5B1	chr1	20290919	20354894	+	1.60946	-0.100356	8.40425	0.00374345	0.012085
RP11-1396O13.2	chr4	9563171	9563950	+	0.786445	-1.94146	8.39977	0.00375268	0.0121057
RP11-1086I4.2	chr17	34000789	34006772	-	1.7088	-3.49321	8.39729	0.0037578	0.0121173
BTBD16	chr10	122271306	122338162	+	0.861198	0.514404	8.39478	0.003763	0.0121284
CDK6	chr7	92604921	92836594	-	0.656706	7.03836	8.38569	0.00378187	0.0121837
S100A7	chr1	153457744	153460701	-	3.45084	4.92446	8.38567	0.00378192	0.0121837
RP11-783K16.5	chr11	64245964	64248217	+	0.585639	0.126305	8.37632	0.0038014	0.0122394
MRPL45P1	chr2	88364695	88365608	-	1.59532	-3.76487	8.37548	0.00380318	0.0122436
ERVMER61-1	chr1	187641226	187643860	+	2.58812	-2.58404	8.37516	0.00380384	0.0122444
CYP2B7P	chr19	40924219	40950660	+	1.13472	1.7232	8.367	0.00382096	0.0122895
WISP3	chr6	112054072	112070969	+	0.890407	1.36552	8.36284	0.00382971	0.0123119
RNF223	chr1	1070966	1074307	-	0.71241	1.75119	8.35934	0.0038371	0.0123328
RP11-21B21.4	chr16	88512960	88531053	-	0.722843	-3.80324	8.35889	0.00383805	0.0123344
RP11-22N19.2	chr7	106285480	106286326	+	0.848216	-1.63853	8.35733	0.00384134	0.0123414
LINC00462	chr13	48576974	48578088	-	1.26615	-1.9978	8.35024	0.00385636	0.0123789
RP11-411K7.1	chr6	53930022	53997667	+	0.93273	-1.63613	8.35	0.00385687	0.0123791
MROH3P	chr1	200920994	200966530	+	0.873788	-2.56235	8.34879	0.00385944	0.0123844
GCKR	chr2	27496842	27523684	+	0.873695	0.542996	8.34622	0.00386491	0.0123963
PVRL4	chr1	161070995	161089599	-	0.643917	3.85904	8.33715	0.00388425	0.0124526
FEZF1	chr7	122301394	122310691	-	1.08331	1.24736	8.33539	0.00388802	0.0124589
TRIM7	chr5	181193924	181205293	-	0.797645	2.82098	8.3274	0.00390515	0.0124979
RP11-159F24.6	chr5	43511058	43521811	+	0.759882	-3.40545	8.32666	0.00390674	0.0125016
C9orf84	chr9	111686173	111795008	-	0.697994	-0.761159	8.32392	0.00391264	0.0125161
C1orf177	chr1	54806063	54842252	+	0.823952	-1.8656	8.32142	0.00391804	0.0125295
SEC14L4	chr22	30488913	30505711	-	1.1949	0.939819	8.31999	0.00392111	0.0125374
DUOXA2	chr15	45114321	45118421	+	1.35282	4.77762	8.31702	0.00392753	0.0125551
RNFT1P3	chr17	20743333	20754501	-	0.92558	-3.80008	8.31024	0.00394222	0.0125991
DLX1	chr2	172084740	172089677	+	1.46075	0.00186319	8.29991	0.0039647	0.0126637
RP4-738P11.3	chr1	168542737	168543354	+	1.6425	-3.45293	8.29175	0.00398256	0.0127046
ZNF969P	chr4	110415898	110418504	+	1.06473	-3.63273	8.29084	0.00398455	0.0127095
[truncated: 752 more rows]

## Sheet: Tumor
gene	chrom	chromStart	chromEnd	strand	logFC	logCPM	LR	PValue	FDR
GNL3L	chrX	54530211	54561071	+	2.9088	4.53017	1915.3	0	0
MOB1A	chr2	74152528	74178898	-	1.66208	7.16199	1525.01	0	0
MTDH	chr8	97644179	97728770	+	1.91502	7.42143	1318.46	1.10141e-288	4.24167e-286
FAM222B	chr17	28755978	28855232	-	1.87709	5.51142	1264.62	5.50889e-277	1.84037e-274
RP11-323N12.5	chr17	78855478	78855844	+	11.1667	2.38609	1197.7	1.925e-262	5.13235e-260
PSMB2	chr1	35599544	35641844	-	1.82336	6.90236	1139.55	8.39184e-250	2.05919e-247
XPR1	chr1	180632004	180890251	+	2.36123	5.42594	1137.45	2.39711e-249	5.77976e-247
ZFP64	chr20	52051663	52204308	-	1.91092	4.49548	1123.01	3.29989e-246	7.68902e-244
PAK2	chr3	196739857	196832647	+	1.4708	6.72396	1088.96	8.27194e-239	1.82035e-236
POMK	chr8	43093506	43123434	+	3.68837	2.67614	1078.5	1.55583e-236	3.29314e-234
RAC1P2	chr4	46723830	46724408	-	4.33474	3.90488	1077.25	2.91259e-236	6.07221e-234
CLDN7	chr17	7259903	7263983	-	5.26322	6.92087	1048.37	5.50735e-230	1.09862e-227
RABIF	chr1	202878957	202889135	-	1.57598	3.68039	1023.57	1.3522e-224	2.51637e-222
PUM1	chr1	30931506	31065991	-	1.20354	6.73639	1020.9	5.15503e-224	9.52924e-222
GRIN2D	chr19	48394875	48444931	+	6.67235	4.94205	1007.26	4.75476e-221	8.61699e-219
LCLAT1	chr2	30447226	30644225	+	1.99037	4.5312	993.429	4.8145e-218	8.29171e-216
SNX10	chr7	26291895	26374329	+	4.04867	3.93935	990.248	2.36581e-217	3.99996e-215
PPP2R5E	chr14	63371357	63543374	-	1.3006	5.47896	980.574	2.99727e-215	4.97654e-213
TMEM185B	chr2	120221278	120223408	-	1.87996	4.67797	979.144	6.13389e-215	1.00639e-212
PLBD2	chr12	113358566	113391625	+	1.61021	6.33927	973.938	8.30518e-214	1.33887e-211
ILDR1	chr3	121987323	122022204	-	5.19466	2.80481	970.468	4.71648e-213	7.55945e-211
LRRC58	chr3	120324509	120349339	-	1.7229	5.9253	963.523	1.52463e-211	2.41571e-209
KIF20B	chr10	89701610	89774939	+	2.84435	4.50674	929.969	2.99909e-204	4.19993e-202
UBE2D1	chr10	58334975	58370753	+	1.70843	4.46678	927.971	8.15533e-204	1.13634e-201
USP42	chr7	6104884	6161564	+	1.27865	4.51137	918.567	9.02915e-202	1.22726e-199
RPRD2	chr1	150363091	150476566	+	1.45083	6.20399	914.449	7.09313e-201	9.45568e-199
DCLRE1B	chr1	113905141	113914086	+	1.96638	3.25904	912.381	1.99685e-200	2.6366e-198
NDE1	chr16	15643267	15726353	+	1.98442	4.89843	909.092	1.03614e-199	1.33628e-197
RB1	chr13	48303751	48481986	+	2.12221	6.12465	908.437	1.43765e-199	1.84551e-197
DUSP18	chr22	30652051	30667890	-	2.14432	3.53218	900.743	6.76483e-198	8.56508e-196
LZIC	chr1	9922113	9943407	-	1.5729	4.33926	895.994	7.29091e-197	9.10642e-195
NBN	chr8	89933336	90003228	-	1.87343	5.64146	891.97	5.46408e-196	6.73369e-194
CHRAC1	chr8	140511298	140517137	+	1.59925	5.34586	890.724	1.01938e-195	1.25068e-193
PRR11	chr17	59155499	59204705	+	4.0052	4.10413	886.671	7.75179e-195	9.34529e-193
YWHAB	chr20	44885676	44908532	+	1.59927	8.46765	883.796	3.26906e-194	3.90709e-192
ZNF460	chr19	57280051	57293569	+	3.09619	2.92355	882.051	7.82821e-194	9.3159e-192
RP11-603J24.9	chr12	56101331	56109289	+	8.01136	1.98568	879.013	3.58255e-193	4.2271e-191
CKAP2	chr13	52455429	52476628	+	3.35732	5.1253	876.248	1.42978e-192	1.65879e-190
DCK	chr4	70992538	71030914	+	1.90846	4.73137	872.045	1.17226e-191	1.33763e-189
CLDN1	chr3	190305701	190322475	-	6.12422	6.00862	869.624	3.93856e-191	4.36833e-189
TPP1	chr11	6612763	6619461	-	1.55226	7.80875	867.622	1.07286e-190	1.17582e-188
INTS7	chr1	211940399	212035542	-	1.85515	4.55207	865.89	2.55264e-190	2.7434e-188
TTLL5	chr14	75633625	75955078	+	1.30544	4.54878	848.942	1.23477e-186	1.30181e-184
ACTR2	chr2	65227753	65271253	+	1.38168	7.58941	848.125	1.85852e-186	1.95201e-184
RP11-598P20.3	chr8	43125995	43126397	-	3.41115	0.468034	843.968	1.48893e-185	1.54625e-183
ZNRF2P1	chr7	32728569	32729011	+	4.35166	0.0645808	843.687	1.71409e-185	1.76685e-183
SF3B4	chr1	149923317	149928344	-	1.5387	6.4285	841.824	4.35464e-185	4.47205e-183
CENPL	chr1	173799550	173824720	-	2.06046	2.83476	841.753	4.51296e-185	4.61754e-183
KDM1B	chr6	18155329	18223853	+	2.31751	4.84172	840.38	8.97315e-185	9.14734e-183
R3HDM1	chr2	135531455	135725270	+	1.41363	5.06229	839.519	1.38127e-184	1.40293e-182
RAC1	chr7	6374523	6403977	+	1.55799	8.51194	838.153	2.73565e-184	2.75833e-182
KIAA1211	chr4	56049073	56328625	+	4.51936	3.96929	834.211	1.96907e-183	1.94994e-181
IMPAD1	chr8	56957933	56993844	-	1.53917	6.72482	833.04	3.53878e-183	3.46725e-181
CAPRIN1	chr11	34051683	34101156	+	1.50316	7.76916	828.376	3.6536e-182	3.52986e-180
NFATC3	chr16	68084751	68229259	+	1.67235	5.32408	828.366	3.67297e-182	3.53625e-180
AGPS	chr2	177392644	177543836	+	1.64481	5.46854	827.333	6.15748e-182	5.8874e-180
HUS1	chr7	47695730	47979581	-	1.38242	3.87386	819.548	3.03472e-180	2.80489e-178
TUBB	chr6	30720201	30725426	+	1.73606	9.2433	817.044	1.06272e-179	9.72512e-178
RP11-449H3.3	chr5	146203550	146339251	+	4.40861	1.93919	815.137	2.76106e-179	2.50192e-177
ASXL2	chr2	25733753	25878516	-	1.46451	5.67853	814.993	2.96656e-179	2.67937e-177
C10orf12	chr10	96981284	96986212	+	2.27906	3.09237	814.428	3.93763e-179	3.54489e-177
IQGAP1	chr15	90388218	90502243	+	1.8666	8.25488	814.339	4.11753e-179	3.69485e-177
FGD6	chr12	95076749	95217482	-	2.7276	4.8942	812.337	1.12126e-178	1.00291e-176
RSRC1	chr3	158105855	158545730	+	1.43591	4.26715	810.259	3.17458e-178	2.8213e-176
ZBTB20	chr3	114338094	115147271	-	4.15281	2.929	808.396	8.06425e-178	7.12119e-176
PIGU	chr20	34560542	34698790	-	1.96945	4.93236	794.944	6.78163e-175	5.82171e-173
ONECUT2	chr18	57435685	57491297	+	7.3888	5.74837	791.252	4.30535e-174	3.65072e-172
MB21D1	chr6	73413515	73452276	-	2.71387	3.55006	787.917	2.28663e-173	1.90401e-171
ZC3HAV1	chr7	139043520	139109719	-	1.31655	5.91968	785.555	7.4575e-173	6.19107e-171
CDC73	chr1	193122017	193253901	+	1.31098	5.24486	784.671	1.16113e-172	9.55364e-171
EIF2AK2	chr2	37099210	37157065	-	1.82113	6.43785	783.944	1.67123e-172	1.371e-170
F2R	chr5	76716043	76735781	+	2.99066	5.85774	783.722	1.86785e-172	1.52778e-170
STX6	chr1	180972712	181023121	-	1.31333	4.97078	782.385	3.6478e-172	2.97489e-170
LIN54	chr4	82909973	83012926	-	1.67375	4.12522	774.008	2.41723e-170	1.90954e-168
RAET1E-AS1	chr6	149863494	149919507	+	3.8329	1.73089	771.815	7.24498e-170	5.70707e-168
CTC-444N24.7	chr19	57293083	57294469	-	3.12643	1.4076	770.513	1.39087e-169	1.08944e-167
RBL1	chr20	36996349	37095995	-	2.14351	3.91824	764.985	2.2144e-168	1.68683e-166
STK4	chr20	44966474	45079959	+	1.53301	5.79266	762.859	6.4181e-168	4.86233e-166
CST1	chr20	23747553	23751268	-	12.1412	5.98545	762.789	6.64887e-168	5.02343e-166
TWISTNB	chr7	19695462	19709087	-	1.62817	4.55305	761.438	1.30755e-167	9.82539e-166
EPHB2	chr1	22710839	22921500	+	5.70354	6.08411	759.577	3.31927e-167	2.48078e-165
PIK3AP1	chr10	96593312	96720514	-	3.46975	5.11228	758.723	5.09054e-167	3.78419e-165
KIAA1524	chr3	108549869	108589644	-	2.73121	3.17264	756.971	1.22361e-166	9.07169e-165
C3orf38	chr3	88149743	88168729	+	1.27681	3.91224	749.844	4.33925e-165	3.17463e-163
RP11-357H14.17	chr17	48635923	48647023	-	8.784	2.50537	749.568	4.98056e-165	3.63424e-163
DNAAF5	chr7	726701	786475	+	1.67404	5.51026	749.514	5.11714e-165	3.7241e-163
PRR7	chr5	177446445	177456286	+	3.66445	3.17469	748.69	7.73151e-165	5.61202e-163
CTD-2510F5.4	chr17	59202677	59203829	-	4.3063	-0.848677	747.18	1.64661e-164	1.18283e-162
VTA1	chr6	142147162	142224689	+	1.60788	5.45619	746.414	2.41629e-164	1.73124e-162
ACER3	chr11	76860867	77026797	+	1.71908	5.086	745.003	4.89804e-164	3.50033e-162
UGGT1	chr2	128091200	128195677	+	1.29529	6.67254	744.828	5.34512e-164	3.81002e-162
DTL	chr1	212035553	212107400	+	3.87064	4.01142	742.486	1.72676e-163	1.22142e-161
FAM102B	chr1	108560089	108644900	+	2.23608	5.31001	739.807	6.60302e-163	4.64692e-161
SP2	chr17	47896150	47928957	+	1.02932	5.18674	739.218	8.86766e-163	6.22488e-161
RAB8A	chr19	16111629	16134234	+	1.35893	5.80815	735.821	4.85875e-162	3.36809e-160
NUDT4P1	chr1	148748953	148749498	+	2.77008	1.71477	735.193	6.65243e-162	4.58852e-160
NUDT4P2	chr1	146298170	146298715	+	2.77008	1.71477	735.193	6.65243e-162	4.58852e-160
KIF2A	chr5	62306162	62537249	+	1.88643	4.5023	732.933	2.06225e-161	1.4154e-159
PRRC2C	chr1	171485551	171593511	+	1.33589	7.94818	730.88	5.767e-161	3.93861e-159
DDIAS	chr11	82899975	82958277	+	3.72738	2.82291	727.155	3.72284e-160	2.53007e-158
TWF1	chr12	43793723	43806375	-	1.68923	6.90483	726.803	4.44048e-160	3.00307e-158
TMEM106B	chr7	12211241	12243367	+	1.77835	6.14878	720.4	1.09554e-158	7.28471e-157
AGMAT	chr1	15572353	15585110	-	4.59111	3.98351	719.738	1.52604e-158	1.00988e-156
ZNF148	chr3	125225561	125375354	-	1.27017	5.43228	716.349	8.32967e-158	5.42172e-156
UBAP2L	chr1	154220179	154271510	+	1.10996	7.10829	715.377	1.35503e-157	8.77854e-156
FOXP3	chrX	49250436	49264826	-	3.98319	2.24886	715.316	1.39671e-157	9.02753e-156
HOXC11	chr12	53973126	53977643	+	9.32772	1.86517	714.851	1.76352e-157	1.13718e-155
TTYH3	chr7	2631951	2664802	+	2.76406	7.34491	712.975	4.51144e-157	2.88899e-155
ATP11A	chr13	112690329	112887168	+	2.73953	6.80106	711.287	1.05034e-156	6.69514e-155
DHFR	chr5	80626228	80654983	-	2.37737	5.27459	711.197	1.09891e-156	6.98868e-155
UBQLN2	chrX	56563639	56567868	+	1.37977	5.76296	710.931	1.25521e-156	7.96439e-155
REST	chr4	56907876	56935844	+	1.25788	5.40022	707.77	6.10935e-156	3.84127e-154
RBBP9	chr20	18486540	18497243	-	1.74429	4.63251	706.983	9.06284e-156	5.68539e-154
HOXA10	chr7	27170591	27180261	-	7.62167	3.58416	706.673	1.05837e-155	6.62451e-154
ZWILCH	chr15	66504959	66550128	+	1.96532	4.2398	706.062	1.4372e-155	8.97539e-154
CLSTN1	chr1	9729026	9824526	-	1.51047	7.59894	704.775	2.73788e-155	1.70215e-153
RAB6A	chr11	73675638	73761137	-	1.25423	6.93166	704.391	3.31834e-155	2.05382e-153
ATP6AP2	chrX	40580908	40606637	+	1.291	6.48198	704.262	3.53907e-155	2.17586e-153
TUBA1B	chr12	49127782	49131397	-	1.8976	9.64669	703.942	4.15421e-155	2.54841e-153
SFT2D2	chr1	168225938	168253025	+	1.44145	6.56897	703.635	4.84412e-155	2.96507e-153
AHR	chr7	17298622	17346152	+	2.12092	7.17329	703.601	4.92728e-155	3.00933e-153
ARL5A	chr2	151788984	151828492	-	1.19032	5.46414	702.224	9.82138e-155	5.95902e-153
PDLIM5	chr4	94451857	94668227	+	1.5339	6.86287	701.084	1.73786e-154	1.04755e-152
ZNF490	chr19	12577961	12640098	-	2.01547	1.89136	697.082	1.28905e-153	7.68659e-152
BAZ1B	chr7	73440398	73522278	-	1.18316	6.64291	693.512	7.7027e-153	4.56368e-151
USP10	chr16	84699978	84779922	+	1.16747	6.13121	692.77	1.11644e-152	6.60058e-151
CNIH1	chr14	54423560	54441431	-	1.49411	6.15801	691.604	2.00239e-152	1.18133e-150
PATL1	chr11	59636716	59668980	-	1.40342	6.20569	691.087	2.59377e-152	1.52373e-150
BRCA1	chr17	43044295	43125483	-	2.53427	4.23913	690.684	3.17393e-152	1.86061e-150
HMGXB4	chr22	35257452	35295807	+	1.14926	4.61381	690.269	3.90606e-152	2.28015e-150
MAPK1IP1L	chr14	55051631	55070192	+	1.18117	6.62503	689.684	5.23732e-152	3.04446e-150
PSMD1	chr2	231056864	231172827	+	1.41699	6.85041	689.677	5.25424e-152	3.0479e-150
ACTN4	chr19	38647649	38731583	+	1.88529	9.73283	688.755	8.33868e-152	4.80696e-150
RAVER1	chr19	10316212	10333640	-	1.76913	6.47311	688.549	9.24189e-152	5.31658e-150
PABPC1	chr8	100685816	100722809	-	1.92882	10.629	688.113	1.15003e-151	6.60208e-150
SENP1	chr12	48042898	48106308	-	1.30935	4.37746	687.3	1.72786e-151	9.8378e-150
MDK	chr11	46380756	46383837	+	3.55446	7.52942	686.607	2.44381e-151	1.38573e-149
ADO	chr10	62804857	62808483	+	1.40736	4.68355	686.1	3.15061e-151	1.78286e-149
KPNA3	chr13	49699307	49792921	-	1.45816	5.69167	684.85	5.8926e-151	3.32093e-149
SSR1	chr6	7268306	7347446	-	1.38701	7.35536	684.409	7.34762e-151	4.13255e-149
ZNF367	chr9	96385941	96418329	-	2.66955	3.42323	683.588	1.10813e-150	6.21987e-149
PAICS	chr4	56435741	56464579	+	2.01682	6.52043	683.32	1.26742e-150	7.09961e-149
GNA13	chr17	65010715	65056839	-	1.62942	6.36231	683.004	1.4846e-150	8.29942e-149
ZNFX1	chr20	49237946	49278426	-	1.72385	6.70671	681.594	3.00819e-150	1.66822e-148
GMCL1	chr2	69829642	69881396	+	1.48622	4.87456	680.06	6.48342e-150	3.58112e-148
FAM120A	chr9	93451722	93566107	+	1.39285	8.17742	678.171	1.66956e-149	9.16704e-148
MEST	chr7	130486171	130506296	+	3.27687	5.35301	677.135	2.80542e-149	1.53127e-147
ADAMTS12	chr5	33523535	33892192	-	4.21834	4.41645	676.023	4.89651e-149	2.66739e-147
PHF14	chr7	10973872	11169623	+	1.61714	5.59913	675.735	5.65563e-149	3.07489e-147
PDZD11	chrX	70286595	70290514	-	1.55928	4.95416	674.248	1.19039e-148	6.44669e-147
DTWD2	chr5	118837322	118988545	-	1.85738	2.98231	674.168	1.23948e-148	6.69948e-147
CHEK1	chr11	125625136	125676255	+	2.31234	3.9305	673.645	1.61033e-148	8.67016e-147
CKLF	chr16	66552563	66566251	+	2.35197	3.98448	671.485	4.74943e-148	2.53742e-146
ZBTB7A	chr19	4044364	4066945	-	1.58169	6.77628	670.368	8.3094e-148	4.43083e-146
ECT2	chr3	172750682	172821474	+	3.06324	6.15337	669.842	1.08126e-147	5.75453e-146
LIMS1	chr2	108534355	108687246	+	1.41234	6.05639	669.059	1.60061e-147	8.4698e-146
FBXO28	chr1	224114087	224162047	+	1.23299	5.25171	668.757	1.86195e-147	9.81525e-146
WNT2	chr7	117276631	117323289	-	6.89367	2.22562	667.792	3.01834e-147	1.5791e-145
WDHD1	chr14	54938950	55027105	-	2.41769	3.43026	666.709	5.19213e-147	2.70108e-145
DCAF7	chr17	63550461	63594266	+	1.10835	6.7776	666.681	5.26411e-147	2.73339e-145
SLC35F6	chr2	26764284	26781231	+	1.45576	5.82411	665.276	1.06384e-146	5.49312e-145
RP11-463D19.2	chr8	73688691	73878854	-	5.61415	0.317533	662.583	4.09748e-146	2.10788e-144
ARPC5	chr1	183620846	183635757	-	1.27148	6.99401	661.591	6.73553e-146	3.45857e-144
COL10A1	chr6	116118923	116158747	-	7.85598	4.72471	660.152	1.38434e-145	7.05605e-144
TRIM14	chr9	98069275	98119212	-	2.04989	5.74117	658.923	2.56236e-145	1.30126e-143
KIAA1715	chr2	175923892	176002839	-	1.26228	4.97679	658.364	3.3901e-145	1.71222e-143
XXYLT1	chr3	195068279	195271167	-	1.73402	3.83514	657.178	6.13858e-145	3.08912e-143
RNFT2	chr12	116738178	116853631	+	3.16638	2.43061	657.095	6.39764e-145	3.21366e-143
LEF1	chr4	108047545	108168956	-	3.37095	3.69097	656.438	8.88984e-145	4.45746e-143
S100A10	chr1	151982915	151994390	-	2.96791	8.45899	655.209	1.64574e-144	8.22217e-143
B4GALT5	chr20	49632945	49713878	-	1.83432	6.79787	653.581	3.71736e-144	1.84722e-142
RP2	chrX	46836940	46882358	+	1.80124	4.4597	652.938	5.13049e-144	2.54487e-142
TMTC3	chr12	88142296	88199887	+	1.44285	4.58819	652.514	6.34496e-144	3.13606e-142
CLDN3	chr7	73768997	73770270	-	7.6415	6.61462	652.216	7.36328e-144	3.6329e-142
H3F3AP4	chr2	174719908	174720318	+	2.15653	5.99845	652.188	7.46727e-144	3.67766e-142
TRUB1	chr10	114938193	114977676	+	1.40927	4.26179	651.633	9.86325e-144	4.8405e-142
SUV39H2	chr10	14878820	14904315	+	1.82797	3.18662	650.962	1.3804e-143	6.76247e-142
NUP155	chr5	37288137	37371181	-	1.95534	5.43801	648.85	3.9732e-143	1.93279e-141
ANP32E	chr1	150218417	150236156	-	1.81255	5.54439	648.818	4.03845e-143	1.96109e-141
CDH17	chr8	94127171	94217303	-	9.16714	7.16835	648.665	4.3603e-143	2.11368e-141
KHDRBS1	chr1	32013829	32060850	+	0.937794	6.77939	647.926	6.31297e-143	3.03899e-141
SMEK2	chr2	55547292	55618880	-	0.997682	6.58888	646.794	1.11237e-142	5.30873e-141
RPPH1	chr14	20343075	20343407	-	6.41421	4.28098	644.935	2.82204e-142	1.3376e-140
FBXL18	chr7	5431335	5513798	-	2.1317	3.5058	644.918	2.84612e-142	1.34671e-140
CRIPT	chr2	46616416	46625742	+	1.34207	3.85504	642.103	1.16582e-141	5.48826e-140
USP38	chr4	143184917	143223830	+	1.48487	5.18683	642.049	1.19788e-141	5.62965e-140
CTHRC1	chr8	103371515	103382997	+	4.30812	4.69003	641.816	1.34595e-141	6.31482e-140
PSMB3	chr17	38752736	38764231	+	1.81506	6.58043	640.971	2.05445e-141	9.59019e-140
CLSPN	chr1	35720218	35769967	-	3.78103	3.35753	640.881	2.14964e-141	1.00177e-139
ETV6	chr12	11649854	11895402	+	1.40698	5.79345	640.65	2.41298e-141	1.1226e-139
LYAR	chr4	4267701	4290169	-	1.95231	4.1246	640.043	3.27081e-141	1.51661e-139
RCC2	chr1	17406760	17439724	-	1.77799	7.07024	639.979	3.37728e-141	1.56336e-139
REL	chr2	60881521	60931610	+	1.70187	4.97399	639.915	3.48731e-141	1.6116e-139
SPA17	chr11	124673798	124697518	+	1.95321	2.91521	639.842	3.61707e-141	1.66879e-139
AOC1	chr7	150824627	150861504	+	6.10169	6.80103	639.635	4.01111e-141	1.84751e-139
FOXN2	chr2	48314637	48379294	+	1.56527	4.53788	639.165	5.07742e-141	2.33477e-139
CENPN	chr16	81006498	81033114	+	2.19068	3.6545	638.535	6.95748e-141	3.18345e-139
STAG2	chrX	123960212	124422664	+	1.36891	6.50263	638.382	7.51285e-141	3.4319e-139
CHRNA5	chr15	78565520	78595269	+	3.04326	1.88645	637.193	1.36272e-140	6.19435e-139
AC006011.4	chr2	127846736	127847084	-	2.22555	1.11012	636.2	2.24051e-140	1.01511e-138
ZNF574	chr19	42068477	42081565	+	1.45983	4.78762	636.191	2.25042e-140	1.01794e-138
MCM2	chr3	127598223	127622436	+	2.69678	5.49321	634.825	4.46093e-140	2.01454e-138
CLRN3	chr10	127877841	127892947	-	6.75918	3.65732	634.65	4.87072e-140	2.19602e-138
FAM81A	chr15	59372693	59523549	+	3.74185	2.51506	632.952	1.13971e-139	5.1053e-138
KIF18A	chr11	28020620	28108308	-	3.49972	3.07023	632.765	1.25159e-139	5.57943e-138
TFDP1	chr13	113584721	113641470	+	1.70374	6.42768	632.236	1.63139e-139	7.24921e-138
HACD2	chr3	123490820	123585185	-	1.57874	5.961	630.353	4.18801e-139	1.85503e-137
GS1-184P14.2	chrX	24429573	24429920	-	4.66813	-0.588738	629.383	6.8062e-139	3.00993e-137
LINC01296	chr14	19284653	19337730	-	5.37275	2.89722	629.056	8.01902e-139	3.535e-137
FOXD2	chr1	47436017	47440691	+	3.77464	2.43704	628.616	9.9937e-139	4.39153e-137
ACOT7	chr1	6264269	6394391	-	2.24127	5.40924	628.529	1.0442e-138	4.58126e-137
ADAR	chr1	154582062	154627999	-	1.22554	8.21517	628.422	1.10135e-138	4.82436e-137
FKBP1A	chr20	1368978	1393172	-	1.33905	7.73289	628.114	1.28533e-138	5.62137e-137
UTP23	chr8	116766503	116849463	+	1.25483	4.04423	627.954	1.39274e-138	6.08156e-137
HOXA13	chr7	27193503	27200106	-	9.99804	3.97164	627.797	1.50669e-138	6.56877e-137
POU2F1	chr1	167220829	167427345	+	1.42395	5.3889	627.579	1.68052e-138	7.31515e-137
STIL	chr1	47250139	47314147	-	2.94984	4.36182	626.837	2.43597e-138	1.05704e-136
TCF20	chr22	42160013	42343616	-	1.51517	5.95864	624.698	7.11135e-138	3.05711e-136
PRIM2	chr6	57314805	57646849	+	1.55057	3.44113	623.967	1.02537e-137	4.39436e-136
FAT1	chr4	186587783	186726722	-	2.48302	8.00804	623.721	1.16003e-137	4.96378e-136
LSM12P1	chr8	35525176	35525763	-	2.49869	2.56769	623.688	1.1791e-137	5.03762e-136
TIPRL	chr1	168178933	168202114	+	1.09469	4.91312	623.387	1.37126e-137	5.84959e-136
GRN	chr17	44345086	44353102	+	1.74705	8.59598	623.214	1.49545e-137	6.36955e-136
DEK	chr6	18223868	18264823	-	1.44495	6.96098	622.954	1.70311e-137	7.24293e-136
EFR3A	chr8	131904088	132013642	+	1.32416	6.2917	621.913	2.86819e-137	1.21604e-135
SERPINB5	chr18	63476761	63505085	+	7.47359	6.28644	619.282	1.07116e-136	4.51385e-135
HOXC-AS2	chr12	53993810	53996785	-	6.45179	-0.83134	619.263	1.08183e-136	4.5519e-135
ICMT	chr1	6221193	6235972	-	1.26776	6.39153	618.446	1.62834e-136	6.83064e-135
GTF2A1	chr14	81175452	81221377	-	1.0677	5.16233	617.625	2.45646e-136	1.02579e-134
PRKDC	chr8	47773108	47960183	-	1.8387	7.70859	617.507	2.60576e-136	1.08651e-134
NF1	chr17	31094927	31382116	+	1.33583	6.4168	617.036	3.29914e-136	1.37149e-134
DCLRE1C	chr10	14897359	14954432	-	1.51917	3.62611	616.203	5.00636e-136	2.0688e-134
SH3KBP1	chrX	19533975	19887601	-	1.92924	5.68219	614.543	1.14983e-135	4.72334e-134
TRIP13	chr5	892643	919357	+	3.20339	3.89363	614.231	1.34399e-135	5.51273e-134
SNORD17	chr20	17962710	17962946	-	5.61821	0.521961	613.94	1.55527e-135	6.35118e-134
GSTCD	chr4	105708778	105847728	+	1.79637	3.46052	613.613	1.83189e-135	7.45882e-134
CTTNBP2NL	chr1	112396181	112463456	+	1.61321	5.04128	613.583	1.85998e-135	7.56209e-134
IKBIP	chr12	98613405	98645113	-	1.89358	3.3358	613.384	2.05436e-135	8.32797e-134
NMI	chr2	151270465	151290057	-	1.89338	4.71166	610.63	8.15933e-135	3.26939e-133
NAA15	chr4	139301455	139420033	+	1.53554	5.57897	609.753	1.26586e-134	5.06491e-133
LPGAT1	chr1	211743457	211830772	-	1.73176	5.95874	608.733	2.1099e-134	8.38158e-133
METTL7B	chr12	55681546	55684611	+	4.57279	4.22379	608.454	2.42632e-134	9.62474e-133
NDC1	chr1	53765460	53838860	-	1.94694	5.37248	608.018	3.01817e-134	1.19554e-132
ZNF724P	chr19	23221599	23250390	-	3.99645	1.18277	607.853	3.27906e-134	1.29703e-132
SKA3	chr13	21153595	21176602	-	3.94969	3.75745	607.704	3.53311e-134	1.39553e-132
RHNO1	chr12	2876258	2889523	+	1.65804	4.43893	607.527	3.86078e-134	1.52062e-132
SKAP2	chr7	26667062	26995239	-	1.99292	5.2663	607.229	4.48281e-134	1.76311e-132
SLC39A10	chr2	195575977	195737702	+	2.22958	4.37841	606.809	5.53017e-134	2.17196e-132
TRIM10	chr6	30151945	30160934	-	5.16201	0.638737	606.045	8.10928e-134	3.17591e-132
SMC2	chr9	104094260	104141417	+	1.97106	5.09759	605.865	8.87215e-134	3.46977e-132
FNDC1	chr6	159169397	159272109	+	6.60208	5.63481	605.217	1.22737e-133	4.78658e-132
BARD1	chr2	214725646	214809711	-	1.79218	3.49774	604.974	1.38665e-133	5.39258e-132
OSGIN2	chr8	89901859	89927888	+	1.49648	4.24068	604.554	1.71094e-133	6.63511e-132
RPN1	chr3	128619970	128681075	-	1.34426	7.96276	602.759	4.20405e-133	1.61903e-131
PTBP3	chr9	112217716	112333667	-	1.73293	7.3295	602.231	5.47627e-133	2.10313e-131
PDK3	chrX	24465221	24539837	+	2.22079	3.31699	602.227	5.48884e-133	2.10504e-131
CDCA4	chr14	105009573	105021148	-	2.1082	3.97964	601.441	8.13695e-133	3.10773e-131
MMP11	chr22	23768226	23784316	+	5.82634	6.3262	601.287	8.78695e-133	3.34676e-131
TNFSF11	chr13	42562736	42608013	+	5.06985	0.803958	600.699	1.17994e-132	4.48796e-131
RAB7A	chr3	128726122	128814796	+	1.02106	7.85868	599.93	1.73393e-132	6.58609e-131
RP11-486A14.1	chr12	93314809	93315941	+	5.53079	-0.131998	599.092	2.63852e-132	9.99466e-131
DTX3L	chr3	122564238	122575203	+	1.71351	6.52587	598.325	3.87274e-132	1.45901e-130
ARHGAP11A	chr15	32615144	32639949	+	2.96304	4.82197	598.321	3.88094e-132	1.46012e-130
CDX2	chr13	27962137	27971139	-	8.51695	4.62144	598.1	4.33471e-132	1.62863e-130
GNAI3	chr1	109548611	109618321	+	1.19397	6.17459	597.989	4.58275e-132	1.71949e-130
LSM12	chr17	44034635	44067619	-	1.35921	5.75404	597.85	4.91327e-132	1.84102e-130
PTGFRN	chr1	116910057	116990358	+	1.95214	6.40324	597.58	5.62655e-132	2.10544e-130
LYN	chr8	55879813	56014168	+	2.28435	6.09025	597.295	6.48718e-132	2.42421e-130
MXRA5	chrX	3308565	3346641	-	3.46553	7.58701	596.21	1.11712e-131	4.16338e-130
PRPF40A	chr2	152651593	152717997	-	1.06521	6.56278	596.133	1.16132e-131	4.32229e-130
CLDN4	chr7	73799542	73832693	+	4.47339	8.14485	595.6	1.51655e-131	5.63684e-130
CLTC	chr17	59619689	59696956	+	1.27831	8.57638	594.955	2.09488e-131	7.73461e-130
ADAM10	chr15	58588807	58749978	-	1.52977	6.61717	593.412	4.53703e-131	1.66626e-129
SPTAN1	chr9	128552558	128633662	+	1.26968	8.28063	593.399	4.56658e-131	1.6749e-129
MCM4	chr8	47960185	47978160	+	2.5397	6.33815	593.226	4.97916e-131	1.8214e-129
SULF1	chr8	69466624	69660915	+	4.59532	7.33021	592.859	5.98446e-131	2.18338e-129
TMEM206	chr1	212363931	212414901	-	1.61404	2.54871	591.348	1.27571e-130	4.64822e-129
NCAPD2	chr12	6493356	6531955	+	1.86277	6.56314	591.056	1.47668e-130	5.36637e-129
AC093724.2	chr2	131723253	131724279	-	2.53141	0.108835	589.788	2.78579e-130	1.00579e-128
POLR1A	chr2	86020216	86106155	-	1.29438	6.0006	589.762	2.82295e-130	1.01788e-128
YWHAZ	chr8	100916525	100953388	-	1.60737	9.62524	589.557	3.12791e-130	1.12637e-128
APOL6	chr22	35648395	35668409	+	2.27791	6.86884	589.343	3.48216e-130	1.25231e-128
MTCH2	chr11	47617315	47642623	-	1.45994	5.9348	589.244	3.65849e-130	1.31402e-128
TSN	chr2	121737103	121767853	+	1.20178	5.88363	587.873	7.26912e-130	2.60075e-128
DIEXF	chr1	209828007	209857565	+	1.37182	4.76822	587.613	8.28317e-130	2.95593e-128
BRCA2	chr13	32315474	32400266	+	2.92818	3.84382	587.573	8.44952e-130	3.01142e-128
ACTR3	chr2	113889960	113962596	+	1.18242	7.5238	587.065	1.08958e-129	3.87332e-128
CMTM1	chr16	66566393	66579137	+	2.27636	0.163586	586.507	1.4413e-129	5.11707e-128
RP11-1023L17.2	chr5	34190056	34193653	+	3.61677	1.09204	586.031	1.82868e-129	6.47583e-128
EIF4G2	chr11	10797050	10809110	-	1.06271	9.41922	585.22	2.74538e-129	9.69733e-128
GSK3B	chr3	119821323	120094417	-	1.09806	5.9138	584.666	3.62418e-129	1.27689e-127
TMEM69	chr1	45687214	45694443	+	1.25638	4.71991	584.628	3.69397e-129	1.29983e-127
MAD2L1	chr4	120055608	120067074	-	3.08948	4.45677	584.352	4.24148e-129	1.49059e-127
TMEM50A	chr1	25337917	25362361	+	0.998049	6.54256	584.111	4.78452e-129	1.67718e-127
NRM	chr6	30688047	30691420	-	2.0008	4.03368	583.6	6.17969e-129	2.16352e-127
HOXB9	chr17	48621159	48626356	-	7.58976	3.4589	583.231	7.43351e-129	2.59592e-127
IL4I1	chr19	49889654	49929539	-	4.15841	2.93176	582.44	1.10499e-128	3.84914e-127
PHF20	chr20	35771974	35950381	+	1.04794	5.30372	582.414	1.11968e-128	3.89543e-127
ASCC3	chr6	100508194	100881372	-	1.64795	5.69632	582.2	1.24576e-128	4.32864e-127
KLF16	chr19	1852399	1863568	-	2.07759	5.18032	581.672	1.62302e-128	5.63241e-127
SLC25A24	chr1	108134036	108200849	-	1.70923	5.86988	580.165	3.45269e-128	1.19372e-126
SPAST	chr2	32063611	32157637	+	1.23138	4.34341	578.631	7.44464e-128	2.57067e-126
MOB4	chr2	197515571	197553699	+	1.15428	5.16638	577.202	1.52283e-127	5.24535e-126
TMPPE	chr3	33090421	33096801	-	2.05149	2.18107	575.677	3.26987e-127	1.12212e-125
NCOA6	chr20	34689097	34825649	-	1.27121	6.56434	574.317	6.4616e-127	2.21194e-125
INHBA	chr7	41685114	41703108	-	4.77903	5.26176	572.931	1.29355e-126	4.40094e-125
UBE2T	chr1	202331657	202341980	-	2.98052	3.82136	572.48	1.62115e-126	5.502e-125
ZNF644	chr1	90915298	91022272	-	1.07692	5.10699	571.643	2.46584e-126	8.33814e-125
ZNF543	chr19	57320509	57330776	+	1.87631	2.44832	571.284	2.95145e-126	9.94385e-125
GNAI2	chr3	50226292	50259355	+	1.54203	7.82674	571.148	3.159e-126	1.06302e-124
RAP2A	chr13	97434222	97469128	+	1.61828	4.94667	570.741	3.87368e-126	1.30036e-124
ADAM12	chr10	126012381	126388455	-	4.77651	3.8968	570.679	3.99605e-126	1.33819e-124
ANLN	chr7	36389806	36453791	+	3.55423	5.52643	570.601	4.15461e-126	1.38794e-124
EXT1	chr8	117794490	118111853	-	1.51396	5.9723	570.538	4.28782e-126	1.43072e-124
IL32	chr16	3065297	3082192	+	3.66263	7.49399	570.437	4.51059e-126	1.50324e-124
CLPB	chr11	72292425	72434680	-	1.66665	4.28819	569.934	5.80314e-126	1.93169e-124
TMEM209	chr7	130164715	130207770	-	1.46521	4.37165	569.425	7.48922e-126	2.48696e-124
TMEM241	chr18	23197144	23437961	-	1.88808	2.77166	569.108	8.77543e-126	2.90711e-124
DYNLRB1	chr20	34516409	34540958	+	1.51899	6.66408	569.049	9.04209e-126	2.99187e-124
DLEU7	chr13	50711008	50843939	-	2.91442	-0.704802	569.002	9.25669e-126	3.05923e-124
YTHDF3	chr8	63168553	63212786	+	1.21783	6.31224	568.803	1.02236e-125	3.37075e-124
SGOL1	chr3	20160593	20186292	-	3.25542	2.93389	567.9	1.60766e-125	5.28018e-124
SF3B3	chr16	70523788	70577670	+	1.33975	7.2079	567.121	2.37427e-125	7.7634e-124
DCP1A	chr3	53283428	53347610	-	0.953834	5.18777	566.887	2.66995e-125	8.71995e-124
BMP8A	chr1	39491646	39525935	+	3.38148	1.74143	566.459	3.30888e-125	1.0794e-123
MIER1	chr1	66924895	66988619	+	1.02337	5.49701	566.192	3.78197e-125	1.23227e-123
MYB	chr6	135181315	135219173	+	4.15582	4.33691	566.057	4.04612e-125	1.31679e-123
SND1-IT1	chr7	127997597	128000077	+	3.87542	0.039378	565.463	5.44718e-125	1.76861e-123
RP11-82O19.2	chr17	29775747	29776701	-	4.57659	-1.4784	565.346	5.77575e-125	1.8731e-123
SLC27A2	chr15	50182196	50236395	+	3.92072	3.6109	564.698	7.99112e-125	2.5855e-123
TFAP2A	chr6	10393186	10419659	-	4.68497	4.02394	564.041	1.11053e-124	3.58891e-123
GATSL2	chr7	74964818	75024798	+	2.99588	1.95531	563.31	1.60153e-124	5.16964e-123
PLK4	chr4	127880861	127899195	+	2.72995	3.27564	563.213	1.68168e-124	5.42204e-123
ACAP2	chr3	195274736	195443078	-	1.29342	5.7925	563.151	1.73413e-124	5.58466e-123
SCARNA7	chr3	160514907	160515236	-	5.39783	0.864721	562.453	2.46067e-124	7.90609e-123
CTCF	chr16	67562407	67639183	+	0.848098	5.73952	562.314	2.63785e-124	8.45575e-123
RNF2	chr1	185045364	185102608	+	1.46936	3.99729	561.832	3.35845e-124	1.07532e-122
LDHA	chr11	18394388	18408425	+	2.20538	9.25396	561.543	3.88126e-124	1.24129e-122
PARPBP	chr12	102120185	102197520	+	2.77671	3.17932	561.06	4.94391e-124	1.57932e-122
RPGRIP1L	chr16	53597683	53703938	-	1.53132	2.69447	559.658	9.97635e-124	3.1723e-122
SGOL2	chr2	200510008	200583782	+	2.49599	3.2386	559.173	1.27224e-123	4.03625e-122
RP11-438J1.1	chr3	10249372	10285796	+	3.86657	2.28499	559.117	1.30851e-123	4.14656e-122
TMEM189-UBE2V1	chr20	50081124	50153637	-	4.10468	4.80789	559.085	1.32929e-123	4.2076e-122
CSE1L	chr20	49046246	49096960	+	1.72048	6.76306	558.523	1.76128e-123	5.56861e-122
DUXAP8	chr22	15784959	15829984	+	4.83284	3.29697	558.117	2.15886e-123	6.81788e-122
KIF11	chr10	92593286	92655395	+	3.01462	5.02029	557.711	2.64559e-123	8.336e-122
EXO1	chr1	241847967	241895148	+	3.58173	3.03483	557.605	2.78967e-123	8.78002e-122
ATE1	chr10	121740421	121928801	-	1.6017	5.18735	556.848	4.07623e-123	1.27857e-121
KPNA2	chr17	68035519	68046842	+	2.36035	6.54086	556.786	4.20467e-123	1.31588e-121
KLHL11	chr17	41853545	41865431	-	2.45937	2.44668	556.602	4.61203e-123	1.44174e-121
CEACAM6	chr19	41750977	41772208	+	8.06457	8.87724	556.549	4.73499e-123	1.47851e-121
TAF3	chr10	7818504	8016627	+	1.341	4.31504	556.308	5.34386e-123	1.66676e-121
C4orf46	chr4	158666679	158672255	-	1.6582	3.25128	556.275	5.43272e-123	1.69257e-121
C2orf69	chr2	199911256	199955935	+	1.15561	4.0487	555.878	6.62574e-123	2.06194e-121
MTPN	chr7	135926761	135977353	-	1.23777	6.76877	555.773	6.98584e-123	2.17156e-121
TIMP1	chrX	47582313	47586789	+	3.16152	8.60229	555.012	1.02245e-122	3.1712e-121
RSF1	chr11	77659996	77821017	-	1.20337	5.73511	554.909	1.07682e-122	3.3361e-121
METTL8	chr2	171317405	171434802	-	1.54991	3.90873	554.849	1.10958e-122	3.42991e-121
NAGA	chr22	42058354	42070842	-	1.18939	5.42549	554.375	1.40711e-122	4.34481e-121
HOXC9	chr12	53994895	54003337	+	6.75788	1.07011	554.062	1.64538e-122	5.06361e-121
VMA21	chrX	151396515	151409364	+	1.49796	5.26741	553.625	2.04848e-122	6.2832e-121
ZNF805	chr19	57240685	57255135	+	1.58152	1.68308	553.561	2.11516e-122	6.48056e-121
CARM1	chr19	10871513	10923070	+	1.37754	6.14606	552.504	3.59128e-122	1.09789e-120
BMPR2	chr2	202376936	202567751	+	1.47271	6.49041	552.42	3.74529e-122	1.14372e-120
UBE2N	chr12	93405673	93442262	-	1.17516	6.15611	552.267	4.04485e-122	1.23248e-120
RANBP1	chr22	20115938	20127357	+	1.63058	6.1796	551.983	4.6616e-122	1.41884e-120
POLR1B	chr2	112541915	112577150	+	1.45471	4.73691	551.788	5.14186e-122	1.56331e-120
ZNF484	chr9	92845031	92878038	-	1.45059	2.44812	551.479	6.00112e-122	1.82255e-120
KPNB1	chr17	47649476	47685505	+	0.97847	7.66344	551.341	6.43066e-122	1.94874e-120
GLO1	chr6	38675925	38703141	-	1.48898	6.65211	551.331	6.46192e-122	1.95607e-120
BTBD1	chr15	83016422	83067354	-	1.12032	5.77633	550.658	9.05567e-122	2.73525e-120
SP1	chr12	53380176	53416446	+	1.04384	7.0594	550.617	9.24161e-122	2.78534e-120
TNFRSF9	chr1	7915894	7943165	-	3.86783	1.7561	549.774	1.40974e-121	4.23961e-120
FBXO5	chr6	152970519	152983579	-	1.88856	3.16985	549.593	1.5438e-121	4.63273e-120
HOXB13	chr17	48724763	48729178	-	8.7843	2.82998	549.317	1.7723e-121	5.30695e-120
SERBP1	chr1	67407810	67430415	-	1.07552	7.9925	549.225	1.85619e-121	5.55215e-120
ISG20L2	chr1	156721891	156728799	-	1.11514	5.35119	549.19	1.88849e-121	5.64267e-120
RFC3	chr13	33818049	33966558	+	2.22102	4.31849	549.118	1.95805e-121	5.84421e-120
SLC30A6	chr2	32165841	32224379	+	1.11717	5.11846	548.738	2.36914e-121	7.056e-120
E2F3	chr6	20401906	20493715	+	1.57859	4.06949	547.661	4.06227e-121	1.20469e-119
GINS4	chr8	41529206	41545046	+	2.78747	2.71675	547.173	5.18675e-121	1.53488e-119
PRKAR2A	chr3	48744597	48847846	-	1.16034	6.10265	546.165	8.59323e-121	2.53752e-119
RN7SL1	chr14	49586580	49586878	+	4.45529	8.06174	545.185	1.40462e-120	4.13893e-119
ZC3H13	chr13	45954465	46052759	-	1.52255	6.6378	545.139	1.43735e-120	4.22637e-119
RBM41	chrX	107064420	107118823	-	1.51957	3.51717	543.727	2.91533e-120	8.53604e-119
MRPL30	chr2	99181079	99197626	+	1.07153	4.84449	543.439	3.36717e-120	9.84862e-119
SRP72	chr4	56466915	56503680	+	1.07053	6.51185	543.301	3.60804e-120	1.05309e-118
MZT1	chr13	72708357	72727687	-	1.9066	4.26837	542.896	4.41991e-120	1.2887e-118
CCR8	chr3	39329706	39333511	+	5.09659	-1.05804	542.798	4.6412e-120	1.3518e-118
NRAS	chr1	114704469	114716894	-	1.4891	5.80184	541.909	7.24703e-120	2.10194e-118
MPZL1	chr1	167721192	167791919	+	1.08357	6.99361	541.367	9.5082e-120	2.75202e-118
PSME3	chr17	42824385	42843758	+	1.22631	6.92848	541.238	1.01415e-119	2.93224e-118
ZNF281	chr1	200404940	200410056	-	1.12805	4.2229	540.714	1.3187e-119	3.80885e-118
PPIA	chr7	44796680	44824564	+	1.49781	9.57009	540.541	1.43828e-119	4.1499e-118
CPSF2	chr14	92121937	92172145	+	1.07727	5.69045	540.39	1.55073e-119	4.4697e-118
CAMK2N1	chr1	20482391	20486220	-	3.05935	6.50517	540.247	1.66614e-119	4.79739e-118
EFNA2	chr19	1286154	1300237	+	7.41883	2.23223	540.065	1.825e-119	5.24934e-118
BCL11B	chr14	99169287	99271524	-	2.55957	3.67873	539.425	2.51455e-119	7.21775e-118
VCPIP1	chr8	66628487	66667217	-	1.15848	4.9569	539.27	2.71747e-119	7.79213e-118
MRPL3	chr3	131462212	131502983	-	1.29623	6.25717	539.059	3.02149e-119	8.65495e-118
OLFML2B	chr1	161983192	162023854	-	3.8942	4.99683	539.042	3.04622e-119	8.71679e-118
IDE	chr10	92451684	92574076	-	1.26683	5.74487	539.016	3.08729e-119	8.82519e-118
NEK6	chr9	124257606	124353307	+	1.76066	5.78994	538.984	3.1365e-119	8.95662e-118
AUNIP	chr1	25831913	25859458	-	2.74535	1.57196	537.781	5.72981e-119	1.63285e-117
GABRD	chr1	2019324	2030751	+	3.7203	0.708675	537.297	7.3037e-119	2.07923e-117
ZNF526	chr19	42220271	42228201	+	1.18364	3.71843	536.088	1.33802e-118	3.7974e-117
SLC25A43	chrX	119399060	119454478	+	1.65125	4.50403	535.174	2.11456e-118	5.97073e-117
NUTF2	chr16	67846732	67872567	+	1.44662	6.21731	535.003	2.30393e-118	6.49882e-117
CHAMP1	chr13	114314513	114327328	+	1.31869	5.07541	534.982	2.32838e-118	6.56112e-117
SULF2	chr20	47656348	47786616	-	2.59131	7.00098	534.552	2.88857e-118	8.12316e-117
ATF7IP	chr12	14365632	14502935	+	1.19793	6.19133	534.215	3.41976e-118	9.60721e-117
ZNRF2P2	chr7	29598795	29685255	-	2.37304	0.317895	534.051	3.71257e-118	1.04193e-116
LIN9	chr1	226231149	226309869	-	1.71285	3.08165	533.325	5.34104e-118	1.49441e-116
AC007969.5	chr2	171517270	171517716	-	2.66278	2.14642	533.277	5.47084e-118	1.52919e-116
PLBD1	chr12	14503661	14568349	-	2.93412	6.30712	533.171	5.76933e-118	1.611e-116
MCUR1	chr6	13786557	13814568	-	1.78035	5.19264	533.15	5.82999e-118	1.6263e-116
FAR2	chr12	29149103	29340980	+	2.89272	4.19998	533.055	6.11364e-118	1.70371e-116
CNOT4	chr7	135361795	135510127	-	0.872484	4.40097	532.716	7.24563e-118	2.01309e-116
TAF1B	chr2	9843354	9934416	+	1.2754	3.1103	532.629	7.56891e-118	2.10081e-116
HTR1D	chr1	23191895	23194729	-	8.37135	2.45877	532.246	9.16939e-118	2.54249e-116
CREG1	chr1	167529677	167553767	-	1.22157	6.84226	531.743	1.17977e-117	3.25824e-116
LY6E	chr8	143017982	143023832	+	3.26312	8.08451	531.554	1.29692e-117	3.57109e-116
LAMP3	chr3	183122213	183163839	-	4.1175	3.74321	531.305	1.46909e-117	4.03717e-116
Metazoa_SRP	chr14	49862550	49862849	-	4.49666	8.44623	531.213	1.53826e-117	4.22304e-116
IGF2BP3	chr7	23310209	23470467	-	7.10691	3.64724	530.416	2.2936e-117	6.27809e-116
MAPRE1	chr20	32819893	32850405	+	1.23391	6.64042	530.083	2.70901e-117	7.40783e-116
CTSC	chr11	88293592	88337787	-	2.21702	7.03227	529.898	2.97192e-117	8.11877e-116
TRAF3	chr14	102777476	102911500	+	1.31497	4.92842	529.695	3.29108e-117	8.97298e-116
FERMT1	chr20	6074845	6123544	-	3.39718	6.32861	529.48	3.66516e-117	9.98306e-116
SH3BP1	chr22	37634654	37666932	+	2.39771	5.36363	529.302	4.00758e-117	1.0905e-115
SSX2IP	chr1	84643707	84690803	-	1.75811	4.48937	529.262	4.08815e-117	1.11133e-115
SKA2	chr17	59109951	59155269	-	1.35743	4.72923	528.912	4.87226e-117	1.3219e-115
ZBTB33	chrX	120250752	120258398	+	1.39134	4.9332	528.796	5.16235e-117	1.39923e-115
INCENP	chr11	62123973	62153163	+	1.90102	4.77714	528.685	5.45692e-117	1.47763e-115
PLA2G7	chr6	46704201	46735693	-	4.12656	3.26476	528.234	6.84319e-117	1.8512e-115
MRPL19	chr2	75646783	75690851	+	1.16032	4.7821	528.146	7.14855e-117	1.93192e-115
FAM86C1	chr11	71787510	71801236	+	1.5193	2.7388	528.025	7.59742e-117	2.05123e-115
ALG3	chr3	184242301	184249548	-	1.63377	6.02046	527.542	9.67429e-117	2.60689e-115
IGSF6	chr16	21639537	21652660	-	3.25066	3.32616	527.456	1.01018e-116	2.71944e-115
SRPK1	chr6	35832966	35921342	-	1.60232	6.2541	526.975	1.28541e-116	3.45368e-115
RP11-817I4.1	chr12	32339368	32340724	+	2.58756	-0.255382	524.963	3.52274e-116	9.42842e-115
RPLP0P2	chr11	61615036	61639449	+	5.09665	1.04519	524.915	3.60691e-116	9.6444e-115
TREM2	chr6	41158506	41163186	-	4.11463	2.63337	524.521	4.39428e-116	1.17384e-114
SLC25A32	chr8	103398635	103415189	-	1.32914	4.63625	524.501	4.43899e-116	1.18464e-114
POLR2M	chr15	57706629	57782762	+	1.06531	5.31089	524.249	5.03721e-116	1.343e-114
MCM6	chr2	135839626	135876426	-	1.74427	5.32076	523.477	7.41578e-116	1.96959e-114
RPL23AP42	chr3	161429127	161429597	-	1.79774	8.54876	523.351	7.89766e-116	2.09356e-114
ASB7	chr15	100602534	100651705	+	1.13689	3.93275	522.914	9.82968e-116	2.60322e-114
EEA1	chr12	92770637	92929331	-	1.35178	5.22677	522.896	9.91726e-116	2.62391e-114
SNRPD1	chr18	21612267	21633524	+	1.79611	5.53377	522.557	1.1756e-115	3.10449e-114
PRAP1	chr10	133309410	133352683	+	8.02995	5.48573	522.223	1.38973e-115	3.66297e-114
BRIP1	chr17	61681266	61863521	-	2.62801	2.93336	521.98	1.56977e-115	4.13357e-114
CBX3	chr7	26201162	26213356	+	1.26344	6.72966	521.832	1.68991e-115	4.44573e-114
VHL	chr3	10141008	10152220	+	1.20632	5.20665	521.769	1.7441e-115	4.581e-114
PCNA	chr20	5114953	5126626	-	2.09353	6.6057	521.769	1.74464e-115	4.581e-114
RP11-561O23.9	chr9	68250469	68251656	-	4.16525	-1.11195	521.669	1.83454e-115	4.80796e-114
IPO9	chr1	201829141	201884294	+	1.07296	6.3364	521.501	1.99534e-115	5.22444e-114
OLA1	chr2	174072447	174248698	-	1.47287	6.17634	521.106	2.43177e-115	6.36115e-114
TMEM238	chr19	55379245	55384598	-	3.11624	4.5167	520.834	2.78678e-115	7.26921e-114
CTD-2196E14.7	chr16	23571854	23572278	-	2.94916	0.462456	520.63	3.08701e-115	8.03725e-114
HNRNPA1P21	chr3	39334979	39335939	+	4.5035	-1.43596	520.393	3.47494e-115	9.03875e-114
RFWD3	chr16	74621394	74666881	-	1.53126	5.02867	520.316	3.61282e-115	9.3886e-114
CDH13	chr16	82626803	83800640	+	2.8104	3.72509	519.897	4.45587e-115	1.15686e-113
RAD23B	chr9	107283137	107332194	+	1.17437	7.14195	519.641	5.06672e-115	1.31299e-113
RPAP3	chr12	47661249	47706061	-	1.1577	4.49551	518.743	7.94214e-115	2.05621e-113
BICD1	chr12	32106835	32383633	+	2.0223	3.65292	518.742	7.9496e-115	2.05622e-113
VKORC1L1	chr7	65873267	65959563	+	1.23048	5.71388	518.48	9.06289e-115	2.33981e-113
BRCC3	chrX	155071420	155123074	+	1.46047	4.78153	518.425	9.31455e-115	2.40255e-113
SLC44A1	chr9	105244622	105439171	+	1.42471	6.97405	518.245	1.0192e-114	2.62643e-113
GAPDH	chr12	6533927	6538374	+	1.9138	11.0592	518.239	1.02259e-114	2.63247e-113
TPX2	chr20	31739271	31801805	+	3.52186	6.12394	518.237	1.02344e-114	2.63247e-113
PPP1R14BP3	chr4	139114930	139115374	-	2.34534	0.574709	517.639	1.38113e-114	3.5492e-113
CKS2	chr9	89311198	89316703	+	2.87936	4.94681	517.601	1.4077e-114	3.61078e-113
UBXN2A	chr2	23927285	24004909	+	1.13523	4.05861	517.515	1.46978e-114	3.76655e-113
AP001442.2	chr21	25928754	25942686	+	3.96847	-1.76147	516.766	2.13857e-114	5.45523e-113
GM2A	chr5	151212150	151270440	+	1.84855	5.89735	516.532	2.40456e-114	6.12808e-113
ZNF695	chr1	246945547	247008093	-	4.25929	0.914165	516.352	2.6322e-114	6.69594e-113
ENOX2	chrX	130623369	130903317	-	1.30311	3.70462	514.88	5.50015e-114	1.39532e-112
XRCC2	chr7	152644779	152676165	-	2.64361	2.54602	514.662	6.13621e-114	1.55383e-112
ATF1	chr12	50763710	50821122	+	1.05997	4.2242	514.647	6.18186e-114	1.56396e-112
HRH1	chr3	11137093	11263557	+	2.60148	3.21792	514.602	6.32489e-114	1.59869e-112
RSC1A1	chr1	15659869	15661722	+	6.04787	1.8952	514.542	6.51667e-114	1.64567e-112
SNRPB	chr20	2461634	2470853	-	1.74208	7.29945	514.155	7.9088e-114	1.98998e-112
TAPBP	chr6	33299694	33314387	-	1.54532	8.20973	514.129	8.01278e-114	2.01431e-112
BROX	chr1	222712553	222735196	+	1.21351	5.73004	513.73	9.78656e-114	2.45576e-112
GINS1	chr20	25407727	25452628	+	2.88261	3.62231	513.57	1.06066e-113	2.65673e-112
OTX1	chr2	63050057	63057836	+	3.6837	2.35659	513.414	1.1469e-113	2.86757e-112
ZBTB2	chr6	151364117	151391548	-	0.99018	4.04355	513.266	1.23495e-113	3.08494e-112
LATS1	chr6	149658153	149718256	-	1.16906	5.35481	513.089	1.34928e-113	3.36749e-112
EFCAB11	chr14	89794669	89954777	-	1.32264	2.35301	512.933	1.45915e-113	3.63843e-112
TMC7	chr16	18983934	19063942	+	2.90797	3.5678	512.86	1.51347e-113	3.7705e-112
STRA6	chr15	74179466	74212267	-	7.02715	3.27935	512.518	1.79624e-113	4.46291e-112
NACC1	chr19	13118103	13141141	+	1.53683	6.35915	512.074	2.24344e-113	5.56406e-112
ZDHHC5	chr11	57667747	57701187	+	1.05227	6.81616	511.386	3.16718e-113	7.84103e-112
CCL15	chr17	35996440	36002038	-	6.94589	2.69632	511.363	3.20399e-113	7.92509e-112
MGAM2	chr7	142111749	142222324	+	6.76793	5.73135	510.638	4.60741e-113	1.13559e-111
MIR4435-2HG	chr2	111196350	111495100	-	2.34384	3.8965	510.606	4.68171e-113	1.15288e-111
ARL6IP1	chr16	18791667	18801678	-	1.86404	7.78823	510.579	4.74444e-113	1.16729e-111
COL1A1	chr17	50183289	50201632	-	3.84292	11.5125	510.34	5.34785e-113	1.31459e-111
KIAA1143	chr3	44737661	44761662	-	1.16784	5.26742	510.292	5.47809e-113	1.34541e-111
DLEU1	chr13	50082171	50723236	+	1.73768	2.63903	509.9	6.66659e-113	1.63152e-111
SEPT11	chr4	76949703	77040384	+	1.42102	6.59322	509.831	6.90233e-113	1.68772e-111
ARL13B	chr3	93980139	94055668	+	1.44331	3.17627	509.721	7.29279e-113	1.78006e-111
ZC3HAV1L	chr7	139025706	139036029	-	2.15578	2.22358	509.323	8.90263e-113	2.16918e-111
GPATCH11	chr2	37084451	37099244	+	1.03364	3.37015	509.001	1.04599e-112	2.54638e-111
RBM27	chr5	146203600	146289132	+	0.92703	4.8498	508.783	1.16703e-112	2.83855e-111
ETV4	chr17	43527844	43579620	-	4.00051	4.88476	508.479	1.35869e-112	3.29604e-111
TEAD4	chr12	2959330	3040673	+	2.2338	4.09499	507.904	1.81261e-112	4.39337e-111
IPMK	chr10	58191517	58267934	-	1.78634	4.09004	506.885	3.01971e-112	7.29361e-111
RP5-991G20.1	chr16	72665170	72791624	+	1.78565	2.19603	506.696	3.32004e-112	8.01201e-111
PDS5A	chr4	39822863	39977956	-	1.12955	6.76394	506.225	4.20248e-112	1.01151e-110
METAP2	chr12	95473520	95515839	+	1.08225	6.05097	505.529	5.95653e-112	1.43122e-110
WDR43	chr2	28894643	28948222	+	1.36159	5.31009	505.489	6.07554e-112	1.45855e-110
TGS1	chr8	55773142	55825448	+	1.34115	4.56975	505.115	7.32961e-112	1.75809e-110
AP2B1	chr17	35578046	35726409	+	1.28713	7.99786	504.875	8.26519e-112	1.97908e-110
HIST1H4C	chr6	26103876	26104310	+	4.13261	-0.565956	504.433	1.03167e-111	2.46818e-110
SIPA1L3	chr19	37907228	38208372	+	1.90194	6.65342	504.305	1.09962e-111	2.62621e-110
RP11-617F23.2	chr15	90024955	90026003	+	3.96475	-1.29489	503.667	1.5138e-111	3.61227e-110
CKAP2L	chr2	112736607	112764677	-	3.36325	3.38018	503.651	1.52578e-111	3.63773e-110
POGK	chr1	166839447	166856344	+	1.05601	5.91932	503.412	1.72e-111	4.09374e-110
PPT1	chr1	40072705	40097703	-	1.32023	6.46979	503.342	1.78188e-111	4.23739e-110
HIVEP1	chr6	12008762	12164999	+	1.30359	4.90263	502.835	2.29671e-111	5.45233e-110
RACGAP1	chr12	49976923	50033136	-	2.07347	5.22977	502.169	3.20679e-111	7.60632e-110
GALNT1	chr18	35581117	35711834	+	1.57929	6.19743	502.036	3.42671e-111	8.11408e-110
HNRNPAB	chr5	178204507	178211180	+	1.48757	7.41656	501.133	5.38827e-111	1.27371e-109
VIL1	chr2	218419092	218453295	+	4.67555	6.91107	500.897	6.0647e-111	1.43239e-109
KPNA4	chr3	160494995	160565588	-	1.17653	6.5792	500.666	6.80872e-111	1.60538e-109
SPTY2D1	chr11	18606401	18634791	-	1.2086	5.09454	500.491	7.43345e-111	1.75119e-109
POLR2K	chr8	100150584	100154002	+	1.37936	5.48134	500.07	9.17629e-111	2.15993e-109
HCFC1	chrX	153947553	153971807	-	1.32502	7.24036	499.999	9.51138e-111	2.23691e-109
CTSA	chr20	45890144	45898820	+	1.87176	7.94677	499.975	9.62537e-111	2.2618e-109
RP11-428J1.5	chr6	5029972	5043449	+	2.12689	0.386602	499.819	1.04089e-110	2.44385e-109
TRABD2A	chr2	84821650	84907008	-	4.68341	4.00049	499.751	1.07679e-110	2.52386e-109
TWF1P1	chr17	29203426	29204474	-	3.03804	-0.756956	499.735	1.0857e-110	2.5426e-109
TMOD3	chr15	51829628	51947295	+	1.42087	6.40277	499.427	1.26664e-110	2.96383e-109
FANCB	chrX	14843407	14873069	-	2.45976	0.618713	499.357	1.31204e-110	3.06748e-109
DIP2B	chr12	50504985	50748667	+	1.40918	5.80221	499.29	1.3568e-110	3.16945e-109
G3BP1	chr5	151771045	151812785	+	1.01407	7.10413	498.238	2.29764e-110	5.35819e-109
CCNF	chr16	2429394	2458854	+	2.53526	4.26785	498.212	2.32821e-110	5.42493e-109
PPIL1	chr6	36854827	36875024	-	1.56607	4.73716	497.968	2.63129e-110	6.12597e-109
CDKN3	chr14	54396849	54420218	+	3.14806	3.39936	497.943	2.66408e-110	6.19712e-109
C6orf223	chr6	44000580	44005958	+	7.39886	3.04418	497.799	2.86276e-110	6.65369e-109
CMIP	chr16	81445170	81711762	+	1.48401	7.08125	497.506	3.31545e-110	7.69296e-109
ELP4	chr11	31509750	31783998	+	1.12404	3.4753	496.956	4.36824e-110	1.01104e-108
TUBAP2	chr11	90282560	90284172	+	3.15168	-0.667866	496.886	4.52499e-110	1.04645e-108
LACTB2	chr8	70635318	70669174	-	2.42783	4.89581	496.705	4.95457e-110	1.14293e-108
PIK3CB	chr3	138652699	138834938	-	1.36199	5.48688	496.297	6.07704e-110	1.4007e-108
PAQR3	chr4	78887127	78939438	-	1.46281	3.71786	494.916	1.21387e-109	2.78858e-108
GATC	chr12	120446438	120463749	+	0.988171	5.04923	494.64	1.39385e-109	3.19939e-108
KNOP1	chr16	19701934	19718235	-	1.34647	4.69578	494.551	1.4573e-109	3.34227e-108
TMEM33	chr4	41935120	41960572	+	1.36961	6.11291	494.49	1.50296e-109	3.44413e-108
PDSS1	chr10	26697659	26746798	+	2.22578	3.2973	494.259	1.68677e-109	3.85898e-108
XIAP	chrX	123859724	123913979	+	1.27246	5.85459	493.974	1.94638e-109	4.44923e-108
TAF2	chr8	119730775	119832863	-	1.23941	5.21274	493.554	2.40167e-109	5.47194e-108
RP11-616K22.1	chr15	44354691	44355692	+	3.31614	-1.2179	492.903	3.32833e-109	7.56459e-108
DEPDC1B	chr5	60596912	60700190	-	3.0921	3.46849	492.684	3.71439e-109	8.4351e-108
RP11-150O12.3	chr8	37597480	37599858	-	8.45481	1.69617	492.517	4.03783e-109	9.1621e-108
FKBP1C	chr6	63211446	63213024	+	2.08413	-0.100332	492.21	4.70953e-109	1.06688e-107
STAT1	chr2	190964358	191020960	-	2.38428	7.95017	492.193	4.7491e-109	1.07496e-107
EPPK1	chr8	143857324	143878464	-	3.13802	6.87909	491.612	6.35515e-109	1.43732e-107
HS2ST1	chr1	86914648	87109998	+	1.34841	5.24501	491.597	6.40115e-109	1.44654e-107
RP11-2K6.1	chr16	63397707	63397946	+	3.68133	0.519386	491.586	6.43753e-109	1.45358e-107
ANO6	chr12	45215987	45440404	+	1.65751	6.28776	491.525	6.63634e-109	1.49725e-107
CKS1B	chr1	154974653	154979249	+	1.87192	5.22523	490.828	9.41181e-109	2.11827e-107
GAFA3	chr4	37866561	37867091	-	2.97851	-1.22092	490.728	9.89488e-109	2.22519e-107
NEDD1	chr12	96907223	96953777	+	1.34759	4.18229	490.528	1.09351e-108	2.45711e-107
RBM15	chr1	110338506	110346681	+	1.24944	3.72235	490.08	1.36896e-108	3.07107e-107
DCAF12	chr9	34086387	34127399	-	1.37274	5.74495	489.859	1.52907e-108	3.42472e-107
NRAV	chr12	120490328	120495940	-	1.22977	2.83654	489.63	1.71565e-108	3.83951e-107
CASC5	chr15	40594020	40664342	+	3.2339	4.3308	489.451	1.8757e-108	4.19093e-107
CCNA2	chr4	121816444	121823933	-	2.85365	4.95153	489.328	1.99521e-108	4.45436e-107
GJD3	chr17	40362931	40363815	-	4.63056	0.13631	489.305	2.0189e-108	4.50363e-107
OSBPL8	chr12	76351797	76559809	-	1.39309	5.79059	489.246	2.07895e-108	4.63385e-107
SAP130	chr2	127941217	128028120	-	0.912437	5.23032	488.716	2.71157e-108	6.03906e-107
C16orf87	chr16	46796607	46831411	-	1.27687	2.71425	488.236	3.44774e-108	7.67248e-107
ESCO2	chr8	27771949	27812640	+	3.25679	3.47928	487.974	3.93309e-108	8.73852e-107
HOTTIP	chr7	27198575	27207259	+	9.5266	1.99202	487.55	4.86272e-108	1.07781e-106
LY75	chr2	159803355	159904749	-	2.46369	5.31454	487.372	5.31554e-108	1.17442e-106
TFG	chr3	100709331	100748966	+	1.19203	6.93642	487.069	6.1893e-108	1.36638e-106
FAP	chr2	162170684	162245151	-	3.8577	3.77809	486.947	6.57942e-108	1.45135e-106
TRIM15	chr6	30163206	30172696	+	5.83664	3.59512	486.828	6.98143e-108	1.5388e-106
HMGN2P5	chr15	29730713	29730985	+	1.56842	2.44858	486.407	8.62365e-108	1.89625e-106
TUBA1C	chr12	49188736	49274603	+	2.01982	8.35706	486.155	9.78189e-108	2.14413e-106
ARCN1	chr11	118572390	118603033	+	1.02648	7.44017	486.141	9.85233e-108	2.15786e-106
RP11-284F21.7	chr1	156646507	156661424	-	4.22158	2.15122	485.49	1.36508e-107	2.9851e-106
RP11-421E14.2	chr17	51249579	51251748	-	3.90189	-0.811782	485.487	1.36697e-107	2.98686e-106
RN7SK	chr6	52995620	52995950	+	4.29099	5.04384	485.176	1.59722e-107	3.48448e-106
RP11-212P7.3	chr7	128455840	128493859	+	3.60559	0.237342	484.897	1.83697e-107	3.99807e-106
CXCL16	chr17	4733526	4739922	-	2.1381	7.06691	484.377	2.38399e-107	5.18456e-106
BID	chr22	17734138	17774770	-	1.57931	4.71142	484.157	2.66167e-107	5.78393e-106
SNRPF	chr12	95858928	95903828	+	1.71759	5.19312	483.943	2.96369e-107	6.43518e-106
HKDC1	chr10	69220303	69267559	+	4.95674	4.65091	483.888	3.04642e-107	6.60963e-106
BUB1	chr2	110637698	110678114	-	3.28043	4.70405	482.771	5.33075e-107	1.15207e-105
RP3-522D1.1	chr1	112850028	112877871	+	5.13534	-0.525325	482.636	5.70515e-107	1.23203e-105
PSMD11	chr17	32444261	32483318	+	1.14946	6.53181	482.322	6.67631e-107	1.44063e-105
LCOR	chr10	96832260	96981043	+	1.43722	5.5306	481.406	1.05612e-106	2.27186e-105
SLMO2	chr20	59033145	59042909	-	1.8853	6.49294	481.406	1.05612e-106	2.27186e-105
POLR2D	chr2	127843551	127858157	-	0.988423	4.66728	481.377	1.072e-106	2.30422e-105
SPRTN	chr1	231337104	231355023	+	1.07119	3.3741	481.179	1.18345e-106	2.53983e-105
DHFRP1	chr18	26170726	26171284	-	3.73148	1.50524	480.88	1.37459e-106	2.94778e-105
PPP3R1	chr2	68178857	68256237	-	0.894258	5.58253	480.448	1.7072e-106	3.65538e-105
MFHAS1	chr8	8783354	8893645	-	1.73331	5.80778	480.406	1.74311e-106	3.72939e-105
CASC4	chr15	44288729	44415758	+	1.11068	6.52843	480.23	1.9038e-106	4.07005e-105
GNPDA1	chr5	141991749	142013041	-	1.4152	5.02506	479.889	2.25934e-106	4.82642e-105
ZSWIM1	chr20	45881227	45885266	+	1.24237	3.99357	479.79	2.37374e-106	5.063e-105
ESM1	chr5	54977864	55022671	-	4.20657	2.33841	479.687	2.49909e-106	5.32627e-105
BGN	chrX	153494939	153509554	+	3.30502	8.46423	479.669	2.52157e-106	5.37004e-105
FAM49B	chr8	129839593	130017129	-	1.41271	5.73036	479.407	2.87528e-106	6.11863e-105
GMPS	chr3	155870536	155944026	+	1.20907	5.96454	479.285	3.05738e-106	6.50116e-105
RPA3	chr7	7636518	7718607	-	1.61625	4.19863	479.211	3.1722e-106	6.74013e-105
SUMO2	chr17	75165586	75182983	-	1.04994	7.11418	478.887	3.7324e-106	7.92434e-105
CDCA7	chr2	173354820	173368997	+	3.42972	5.50925	477.74	6.63147e-106	1.40044e-104
CEBPZOS	chr2	37196488	37216193	+	0.951768	5.185	477.73	6.66329e-106	1.40609e-104
FXYD5	chr19	35154730	35169883	+	2.4536	6.86165	477.487	7.52491e-106	1.58549e-104
FPR3	chr19	51795163	51826189	+	3.33507	4.14903	477.393	7.88747e-106	1.66062e-104
SKP2	chr5	36151989	36184319	+	2.19138	4.6243	477.276	8.36692e-106	1.76023e-104
NRARP	chr9	137300482	137302251	-	2.59223	5.21143	477.152	8.90073e-106	1.87111e-104
CTA-305I2.1	chr7	102153355	102154463	-	4.89848	-2.15581	476.936	9.91863e-106	2.08351e-104
ORC1	chr1	52372829	52404459	-	2.79293	2.90927	476.37	1.31692e-105	2.76423e-104
RAD51AP1	chr12	4538798	4560048	+	2.62456	3.23106	476.339	1.33776e-105	2.80586e-104
RIPK2	chr8	89757747	89791063	+	1.69279	4.39471	475.853	1.70622e-105	3.57597e-104
DUXAP9	chr14	19062316	19115270	+	4.68782	2.13544	475.691	1.8512e-105	3.8769e-104
ATP2A2	chr12	110280756	110351093	+	1.23968	8.34738	475.608	1.92991e-105	4.03868e-104
FOXM1	chr12	2857681	2877155	-	3.14223	5.90081	475.565	1.97181e-105	4.12325e-104
C5orf51	chr5	41904188	41921636	+	1.22201	5.22121	475.368	2.17641e-105	4.54766e-104
KIF24	chr9	34252381	34329200	-	2.24132	3.01695	475.18	2.39118e-105	4.99266e-104
TBC1D31	chr8	123041968	123152153	+	1.60957	3.02415	474.532	3.30816e-105	6.90208e-104
SH2B3	chr12	111405948	111451623	+	1.57069	5.34945	474.432	3.47758e-105	7.25011e-104
C18orf54	chr18	54357917	54385218	+	2.00218	1.84343	473.775	4.83313e-105	1.00686e-103
TRIM69	chr15	44728988	44767829	+	1.8122	4.91409	473.4	5.83345e-105	1.21434e-103
VDR	chr12	47841537	47943048	-	2.87333	5.48101	473.349	5.98289e-105	1.24451e-103
RP11-345J4.5	chr16	29443056	29454651	-	1.56784	4.36716	473.101	6.77481e-105	1.40819e-103
ZFHX3	chr16	72782885	73059698	-	1.93649	6.06688	472.865	7.62684e-105	1.58291e-103
ATF2	chr2	175072250	175168382	-	0.935776	5.27677	472.676	8.38264e-105	1.73458e-103
CBFB	chr16	67029116	67101058	+	1.43408	5.30634	472.656	8.46758e-105	1.75085e-103
SEC23A	chr14	39031919	39109646	-	1.54391	5.96637	472.233	1.04654e-104	2.16234e-103
CDC27	chr17	47117703	47189422	-	1.02106	5.58972	472.102	1.11769e-104	2.30763e-103
TCEA1P2	chr3	37275693	37276598	+	2.36437	1.01035	471.881	1.24846e-104	2.57569e-103
NCOA7	chr6	125781161	125932030	+	2.07161	6.62293	471.287	1.68193e-104	3.46483e-103
POMP	chr13	28659104	28678925	+	1.42336	6.30431	471.194	1.76132e-104	3.62031e-103
CCDC6	chr10	59788763	59906656	-	1.46479	6.55889	470.83	2.11477e-104	4.33074e-103
DBF4	chr7	87876216	87909541	+	1.83069	4.05179	470.793	2.15399e-104	4.40782e-103
OST4	chr2	27070472	27071773	-	1.62337	7.05088	470.68	2.27893e-104	4.66004e-103
GMEB1	chr1	28668732	28719353	+	0.875564	3.72675	470.652	2.31139e-104	4.72294e-103
PALB2	chr16	23603160	23641310	-	1.25322	3.79361	470.63	2.33751e-104	4.7728e-103
GUCY2C	chr12	14612632	14696585	-	7.68225	4.66535	470.552	2.4306e-104	4.9592e-103
CRLF3	chr17	30769388	30824776	-	1.13539	3.81181	470.472	2.53019e-104	5.15861e-103
CTD-2377D24.6	chr17	48646923	48707346	+	7.02138	2.1367	470.426	2.58832e-104	5.27324e-103
FEZF1-AS1	chr7	122303658	122310077	+	7.66756	1.57328	470.073	3.08914e-104	6.28435e-103
LMNB1	chr5	126776623	126837020	+	2.65328	5.44703	469.787	3.56513e-104	7.24204e-103
NT5DC2	chr3	52524385	52535054	-	2.01425	5.57458	469.734	3.66222e-104	7.43383e-103
TMEM201	chr1	9588922	9614873	+	1.64835	4.55278	469.65	3.8188e-104	7.746e-103
VEZT	chr12	95217746	95302790	+	1.08073	5.43695	469.527	4.06078e-104	8.2308e-103
OSBPL11	chr3	125528858	125595090	-	1.0542	3.79364	469.471	4.17761e-104	8.45523e-103
BAG4	chr8	38176533	38213301	+	1.52394	4.27042	469.226	4.72207e-104	9.55022e-103
VANGL1	chr1	115641953	115698224	+	1.38743	4.97175	468.875	5.63072e-104	1.13631e-102
C15orf39	chr15	75195643	75212169	+	1.34471	5.64001	468.79	5.87527e-104	1.1848e-102
BAZ1A	chr14	34752731	34875647	-	1.41201	5.95007	468.694	6.16555e-104	1.24243e-102
PLEKHG1	chr6	150599863	150843665	+	1.75313	4.6455	468.437	7.01289e-104	1.41215e-102
CH507-513H4.5	chr21	8254592	8255514	-	4.398	2.82598	468.34	7.3614e-104	1.48126e-102
CDC42P6	chr4	22727375	22727950	-	2.22898	0.0961985	468.309	7.47583e-104	1.50319e-102
RAD51	chr15	40694774	40732339	+	2.57341	2.93376	468.256	7.67717e-104	1.54255e-102
ARPP19	chr15	52547045	52569883	-	1.1414	7.0848	468.17	8.01725e-104	1.60972e-102
LRRC8B	chr1	89524836	89597864	+	1.41274	4.68386	468.11	8.26105e-104	1.65747e-102
HOXC8	chr12	54009106	54012362	+	5.65341	0.100655	468.058	8.4783e-104	1.69983e-102
POFUT1	chr20	32207880	32238667	+	1.75209	6.33446	468.009	8.68868e-104	1.73949e-102
KIF26B	chr1	245154985	245709431	+	3.12165	4.48969	467.97	8.86336e-104	1.77318e-102
CASK	chrX	41514934	41923463	-	1.59032	6.34362	467.89	9.22231e-104	1.84366e-102
COPA	chr1	160289273	160343400	-	1.05556	7.75101	467.808	9.61322e-104	1.92043e-102
GNB1	chr1	1785285	1891117	-	0.887046	8.12118	467.744	9.92464e-104	1.98121e-102
RHOG	chr11	3826978	3840983	-	1.26809	5.89897	467.651	1.03998e-103	2.07458e-102
CSNK2A3	chr11	11351942	11353357	-	2.08037	0.562065	467.595	1.06955e-103	2.1305e-102
KB-1732A1.1	chr8	102805517	102809971	+	3.24878	0.353882	466.756	1.62806e-103	3.23373e-102
MRPL42	chr12	93467488	93516213	+	1.12283	5.56843	466.636	1.72903e-103	3.43183e-102
CAD	chr2	27217390	27243943	+	1.48439	6.06479	466.461	1.88724e-103	3.74316e-102
RALBP1	chr18	9475009	9538116	+	1.14774	6.40257	466.117	2.24262e-103	4.44485e-102
YEATS2	chr3	183697818	183812625	+	1.14007	5.32785	465.006	3.91283e-103	7.73307e-102
SRFBP1	chr5	121961961	122075570	+	1.22931	3.07721	464.57	4.86787e-103	9.60686e-102
MMS22L	chr6	97142161	97283217	-	1.66955	3.69945	464.496	5.05359e-103	9.96629e-102
MCM10	chr10	13161554	13211104	+	3.42096	3.0192	464.37	5.38146e-103	1.06053e-101
C2	chr6	31897785	31945672	+	3.14141	5.81819	463.726	7.43234e-103	1.46159e-101
ZNF624	chr17	16620737	16653856	-	1.36592	1.70576	463.563	8.0648e-103	1.58484e-101
CCDC34	chr11	27330827	27363868	-	1.97477	3.7583	463.516	8.25685e-103	1.62143e-101
MSH2	chr2	47402969	47562311	+	1.50675	4.53171	463.412	8.69945e-103	1.70714e-101
LRRC8D	chr1	89821014	89936611	+	1.25104	4.70695	463.191	9.71344e-103	1.90477e-101
CDH3	chr16	68636189	68722616	+	4.10735	5.14806	463.025	1.05593e-102	2.06771e-101
PTBP1	chr19	797075	812327	+	1.03649	8.16172	462.993	1.07297e-102	2.0996e-101
ELK3	chr12	96194382	96269835	+	1.71378	5.68419	462.598	1.30765e-102	2.55701e-101
PNO1	chr2	68157844	68176238	+	1.19333	4.17755	462.524	1.35686e-102	2.65137e-101
MCMBP	chr10	119829404	119892556	-	1.01834	5.97028	462.459	1.40239e-102	2.73841e-101
CKAP5	chr11	46743048	46846308	-	1.26024	6.76079	461.831	1.92097e-102	3.74839e-101
TMEM26	chr10	61406643	61453450	-	2.50145	0.849864	461.772	1.97808e-102	3.85711e-101
RMRP	chr9	35657754	35658017	-	6.1176	3.20797	461.632	2.12247e-102	4.13576e-101
RBMS2P1	chr12	94423744	94424969	-	3.13861	-1.76839	461.361	2.43089e-102	4.72677e-101
CSTF2	chrX	100820359	100840932	+	1.56901	3.94396	461.298	2.50905e-102	4.87532e-101
CENPE	chr4	103105806	103198409	-	3.12491	4.2967	460.241	4.26062e-102	8.25566e-101
EP300	chr22	41091786	41180077	+	0.898327	7.01304	459.392	6.51929e-102	1.26234e-100
THBS2	chr6	169215780	169254044	-	4.19277	6.82201	459.391	6.52399e-102	1.26237e-100
SRP9	chr1	225777813	225790466	+	1.19648	7.25405	459.088	7.59294e-102	1.46716e-100
ZNF267	chr16	31873758	31917357	+	1.37357	3.88426	459.026	7.83194e-102	1.51229e-100
DAG1	chr3	49468703	49535618	+	1.42163	7.73927	458.865	8.48985e-102	1.63818e-100
ZNF146	chr19	36214602	36238774	+	1.11008	6.02059	458.804	8.75097e-102	1.68739e-100
DSCC1	chr8	119833976	119856010	-	2.1399	3.01264	458.603	9.68087e-102	1.8654e-100
ASPM	chr1	197084128	197146694	-	3.38594	4.84081	458.529	1.00442e-101	1.93406e-100
RAD21	chr8	116845935	116874866	-	1.33131	7.45436	458.392	1.07577e-101	2.06859e-100
FOXO3B	chr17	18670946	18672873	-	2.18986	0.498422	458.038	1.2847e-101	2.46691e-100
AMMECR1	chrX	110194186	110440233	-	1.75273	4.29309	457.581	1.61568e-101	3.10032e-100
VPS35	chr16	46656132	46689518	-	1.05544	6.94169	456.839	2.34276e-101	4.48309e-100
ZNF398	chr7	149126416	149182802	+	1.05537	4.29119	456.573	2.67764e-101	5.12038e-100
CCL18	chr17	36064280	36072032	+	6.49694	4.69512	456.522	2.74622e-101	5.24791e-100
NIP7	chr16	69339430	69343111	+	1.32739	4.36919	456.418	2.89312e-101	5.52482e-100
AIM1L	chr1	26321859	26354130	-	4.58132	4.04567	456.176	3.26664e-101	6.22097e-100
RHBDD1	chr2	226835581	226999215	+	0.918266	4.71252	455.861	3.82445e-101	7.27327e-100
SPATS2L	chr2	200305881	200482263	+	1.524	6.75433	455.504	4.57408e-101	8.69294e-100
APLNR	chr11	57233577	57237314	-	3.17918	4.87686	455.39	4.84422e-101	9.20004e-100
MYBL2	chr20	43667019	43716496	+	3.7668	6.002	455.353	4.93469e-101	9.36545e-100
F2RL2	chr5	76615482	76623434	-	3.57819	3.85116	455.15	5.46154e-101	1.03512e-99
PYCARD	chr16	31201485	31203450	-	2.33856	4.96249	455.065	5.70006e-101	1.07959e-99
AC012363.4	chr2	120174885	120216544	-	5.41406	-1.06009	455.046	5.75505e-101	1.08926e-99
RNASEH1	chr2	3544793	3558616	-	0.964475	3.75442	454.995	5.9033e-101	1.11606e-99
ATIC	chr2	215311817	215349773	+	1.27486	6.00522	454.994	5.90472e-101	1.11606e-99
TNFRSF10A	chr8	23190452	23225126	-	2.03373	3.76685	454.93	6.09911e-101	1.15202e-99
SNRPB2	chr20	16729961	16742563	+	1.40686	5.51269	454.788	6.54872e-101	1.2361e-99
CLDN16	chr3	190322541	190412143	+	5.70919	-0.672528	454.708	6.81694e-101	1.28585e-99
TXNDC9	chr2	99318982	99340702	-	1.08909	4.27968	454.372	8.06486e-101	1.51917e-99
HELLS	chr10	94501434	94613905	+	2.19798	4.38105	454.16	8.97033e-101	1.68859e-99
C17orf53	chr17	44141906	44162476	+	2.37846	2.16174	453.906	1.01862e-100	1.91616e-99
AFAP1	chr4	7758714	7939926	-	1.77718	5.77882	453.786	1.08183e-100	2.03369e-99
SREK1IP1	chr5	64718144	64768685	-	1.37472	5.04754	453.603	1.18581e-100	2.22614e-99
FIGNL1	chr7	50444128	50542535	-	1.73234	3.68347	453.432	1.29197e-100	2.4238e-99
ABALON	chr20	31721507	31723409	+	3.04545	1.07441	453.231	1.42901e-100	2.67908e-99
CDCA2	chr8	25458997	25507920	+	3.46736	3.31794	453.02	1.58825e-100	2.97359e-99
FAM72D	chr1	145096000	145112696	+	3.33432	1.81309	452.12	2.49261e-100	4.64795e-99
SMC3	chr10	110567691	110604636	+	1.18963	5.98792	451.857	2.84449e-100	5.30053e-99
SP3	chr2	173906459	173965702	-	0.893662	6.0658	451.4	3.57555e-100	6.64942e-99
CENPF	chr1	214603195	214664588	+	3.3675	5.97716	451.22	3.91304e-100	7.26731e-99
FAM72A	chr1	206186179	206204414	-	2.69588	2.05425	450.464	5.71558e-100	1.06008e-98
CTSB	chr8	11842524	11869448	-	2.17211	9.69049	450.251	6.36181e-100	1.17915e-98
CENPI	chrX	101098218	101163681	+	2.53451	2.03446	450.201	6.52132e-100	1.2079e-98
RNF138	chr18	32091855	32131561	+	1.17802	4.54544	450.155	6.67558e-100	1.23483e-98
MED1	chr17	39404285	39451286	-	1.65627	5.50675	450.132	6.75068e-100	1.24789e-98
NUDT3	chr6	34279679	34392674	-	1.01599	6.14464	449.641	8.63337e-100	1.59484e-98
CFL1	chr11	65823022	65862026	-	1.44509	9.64647	449.441	9.54697e-100	1.76009e-98
MALL	chr2	110083870	110116566	-	3.67276	6.59894	448.97	1.20847e-99	2.225e-98
CTB-181H17.1	chr7	101960116	101961894	+	3.92191	-1.65596	448.876	1.26676e-99	2.32922e-98
APOC4-APOC2	chr19	44942238	44949565	+	5.26678	2.80829	448.732	1.36136e-99	2.49985e-98
KIAA0196	chr8	125024260	125091840	-	1.23824	5.89386	448.107	1.86225e-99	3.41286e-98
FAM72B	chr1	121167646	121185539	-	2.8802	1.92383	448.09	1.87812e-99	3.43967e-98
ITM2B	chr13	48233158	48270357	+	1.19017	9.10611	448.081	1.88671e-99	3.45311e-98
MBTPS2	chrX	21839636	21885424	+	1.30132	4.33913	448.022	1.94373e-99	3.55512e-98
LUM	chr12	91102629	91111831	-	3.46921	8.37513	447.874	2.09287e-99	3.82287e-98
BLZF1	chr1	169367970	169396540	+	1.16414	4.47624	447.778	2.19615e-99	4.00625e-98
STAU1	chr20	49113339	49188367	-	1.05314	7.12911	447.531	2.48588e-99	4.52882e-98
OAS3	chr12	112938352	112973249	+	2.74686	7.03005	447.502	2.52259e-99	4.59267e-98
PABPC3	chr13	25095868	25099254	+	2.49895	0.0462539	447.357	2.71147e-99	4.93332e-98
IPP	chr1	45694324	45750650	-	1.18065	3.26853	447.34	2.73551e-99	4.97379e-98
MYH14	chr19	50188186	50310545	+	2.41504	8.45828	447.216	2.91116e-99	5.28969e-98
MYH9	chr22	36281281	36388018	-	1.18297	9.95926	447.085	3.10778e-99	5.64326e-98
DIMT1	chr5	62387254	62403939	-	1.05216	4.54166	446.937	3.34807e-99	6.07561e-98
IPO7	chr11	9384622	9448126	+	1.33832	7.25199	446.386	4.41198e-99	7.99056e-98
RPL28	chr19	55385345	55403250	+	1.71866	9.8601	446.289	4.63247e-99	8.3841e-98
DPY19L1	chr7	34928876	35038271	-	1.75762	5.41534	446.287	4.63533e-99	8.3841e-98
EIF2AK1	chr7	6022244	6059230	-	1.05955	7.29671	446.183	4.88323e-99	8.82673e-98
SCLY	chr2	238060889	238099413	+	1.41262	4.15351	446.131	5.01347e-99	9.05625e-98
FZD2	chr17	44557459	44559570	+	3.0215	2.75199	446.03	5.27326e-99	9.51933e-98
TRIM37	chr17	58982638	59106921	-	1.08452	4.51977	445.841	5.79608e-99	1.04495e-97
TXNDC12	chr1	52020131	52056171	-	1.0913	6.12572	445.563	6.66547e-99	1.20013e-97
RAPGEF6	chr5	131423921	131635236	-	1.22899	4.44779	445.461	7.01371e-99	1.26201e-97
CCT5	chr5	10249921	10266412	+	1.39051	7.40258	445.437	7.09799e-99	1.27566e-97
MAN1A2	chr1	117367449	117528872	+	0.971528	5.89535	445.437	7.09874e-99	1.27566e-97
MACC1	chr7	20134655	20217404	-	3.00367	5.75396	445.386	7.28079e-99	1.30753e-97
BANF1	chr11	66002079	66004149	+	1.3323	6.5687	445.33	7.48969e-99	1.34417e-97
SPDYE3	chr7	100307702	100322196	+	1.41986	1.94127	445.091	8.44045e-99	1.51382e-97
CPSF3	chr2	9423568	9473101	+	1.04711	4.83812	445.083	8.47659e-99	1.51932e-97
SRM	chr1	11054584	11060024	-	1.49447	6.34673	445.045	8.63921e-99	1.54747e-97
MOGAT3	chr7	101195007	101201021	-	8.02157	2.04353	444.969	8.97436e-99	1.60646e-97
MANEA	chr6	95577543	95609457	+	1.55286	4.46258	444.828	9.63202e-99	1.72307e-97
RP5-884M6.1	chr7	106775011	106795564	+	8.01625	0.34864	444.619	1.06973e-98	1.91241e-97
C1GALT1C1	chrX	120625793	120630150	-	1.30033	4.68305	444.611	1.07372e-98	1.91831e-97
KIF5B	chr10	32009010	32056431	-	1.31771	7.75721	444.56	1.10163e-98	1.96563e-97
MISP	chr19	751126	764318	+	3.53668	7.39932	444.466	1.15451e-98	2.05866e-97
PAFAH1B2	chr11	117144267	117176894	+	0.958898	6.25856	444.234	1.2969e-98	2.30959e-97
BPTF	chr17	67825524	67984378	+	0.943313	6.42535	444.198	1.32078e-98	2.35061e-97
C1orf112	chr1	169662007	169854080	+	1.52822	3.13607	443.986	1.46879e-98	2.61068e-97
CRNKL1	chr20	20034368	20056046	-	1.127	4.84056	443.742	1.65958e-98	2.94791e-97
DNAH3	chr16	20933111	21159441	-	3.85448	0.486938	443.612	1.77132e-98	3.14438e-97
GAPDHP1	chrX	39787132	39788136	-	2.98107	0.777568	443.388	1.98157e-98	3.51535e-97
MED14	chrX	40648306	40735858	-	1.28588	6.27067	443.383	1.98674e-98	3.52226e-97
POU5F1P4	chr1	155433178	155434262	+	3.59451	-2.01869	442.75	2.72906e-98	4.83214e-97
PIGK	chr1	77088990	77219430	-	1.00071	4.72939	442.734	2.75116e-98	4.86817e-97
TAOK3	chr12	118149801	118372945	-	1.10758	5.91154	442.577	2.97512e-98	5.25774e-97
TMCC1	chr3	129647792	129893576	-	1.02134	4.43175	442.573	2.98186e-98	5.26631e-97
MTBP	chr8	120445400	120542133	+	1.84471	2.40771	442.451	3.16955e-98	5.59066e-97
POLA1	chrX	24693919	24996986	+	1.37629	4.318	442.135	3.71323e-98	6.54548e-97
ARID1B	chr6	156777374	157210779	+	0.984496	6.37742	441.968	4.0368e-98	7.11133e-97
MSX2	chr5	174724533	174730893	+	3.93119	3.40443	441.185	5.97934e-98	1.05067e-96
AP1S3	chr2	223751686	223838027	-	2.29189	3.51922	441.179	5.99538e-98	1.05282e-96
LMNB2	chr19	2427638	2456996	-	1.7686	6.35934	441.129	6.14875e-98	1.07907e-96
HOXA11	chr7	27181510	27185223	-	7.94779	1.91985	440.953	6.71506e-98	1.17771e-96
TIRAP	chr11	126283065	126298845	+	1.16872	3.38923	440.289	9.36736e-98	1.63769e-96
SMC4	chr3	160399274	160434962	+	1.66028	6.4482	440.204	9.77506e-98	1.70789e-96
LIMK1	chr7	74082933	74122525	+	1.41666	5.30162	440.016	1.07377e-97	1.87373e-96
AIMP2	chr7	6009245	6023834	+	1.46544	4.36259	439.932	1.12004e-97	1.95324e-96
ZNRF2	chr7	30284307	30367692	+	1.22356	4.85443	439.673	1.27511e-97	2.21808e-96
WDFY1	chr2	223855716	223945387	-	1.13271	5.83449	439.233	1.58962e-97	2.76344e-96
COL1A2	chr7	94394561	94431232	+	3.23787	10.4568	439.161	1.64824e-97	2.86356e-96
BCYRN1	chr2	47331060	47344517	+	3.56092	4.07436	438.803	1.97258e-97	3.4249e-96
COL4A1	chr13	110148963	110307149	-	2.34545	8.69401	438.756	2.01897e-97	3.50326e-96
NUP62	chr19	49906825	49929763	-	1.05971	5.95667	438.678	2.09956e-97	3.63854e-96
F12	chr5	177402140	177409576	-	3.90083	2.76	438.571	2.21534e-97	3.83678e-96
FOXD2-AS1	chr1	47432133	47434641	-	2.61333	2.0745	438.25	2.60247e-97	4.50164e-96
HOXC10	chr12	53985065	53990279	+	8.36724	3.25545	438.168	2.71117e-97	4.68674e-96
FOXRED2	chr22	36487190	36507101	-	2.4711	5.32402	438.141	2.74785e-97	4.74718e-96
TMEM150B	chr19	55312801	55334048	-	4.26824	2.50834	438.062	2.85926e-97	4.93352e-96
DTD2	chr14	31446036	31457510	-	1.29915	3.45925	437.817	3.23212e-97	5.5734e-96
GORASP2	chr2	170928464	170967129	+	0.943292	6.80262	437.767	3.31514e-97	5.71301e-96
ABTB2	chr11	34150988	34358008	-	2.02361	4.12096	437.343	4.10015e-97	7.06142e-96
ZBTB24	chr6	109462594	109483237	-	1.09806	3.94647	437.287	4.21539e-97	7.25539e-96
F8A1	chrX	154886349	154888061	+	1.83026	5.41632	436.768	5.46769e-97	9.39332e-96
NPAT	chr11	108157215	108222642	-	1.09816	4.38329	436.755	5.50365e-97	9.44923e-96
ZNF462	chr9	106863097	107013634	+	2.57818	4.31544	436.67	5.74428e-97	9.85627e-96
FYB	chr5	39105236	39274528	-	2.77325	4.82507	436.621	5.8869e-97	1.00947e-95
HOXB7	chr17	48607227	48633572	-	3.14965	3.62172	436.515	6.20713e-97	1.06307e-95
SEPN1	chr1	25800176	25818224	+	1.21338	7.31953	436.18	7.34223e-97	1.25592e-95
CTB-193M12.5	chr16	15701237	15702118	+	1.95988	1.94266	436.07	7.75722e-97	1.32609e-95
TIPIN	chr15	66336206	66386746	-	1.51389	2.42549	435.679	9.43718e-97	1.61129e-95
NEK7	chr1	198156963	198322420	+	1.22429	5.86695	434.486	1.71589e-96	2.9243e-95
CDX1	chr5	150166795	150184558	+	9.38343	4.9559	434.401	1.7905e-96	3.04957e-95
TOP2A	chr17	40388516	40417950	-	3.83465	7.18002	433.983	2.20836e-96	3.75436e-95
PMEPA1	chr20	57648392	57711536	-	3.24516	6.9722	433.972	2.21966e-96	3.77124e-95
TRPM2-AS	chr21	44414588	44425272	-	5.56804	0.797799	433.688	2.5601e-96	4.34434e-95
CYB5B	chr16	69424525	69466266	+	1.64375	6.32371	433.389	2.97307e-96	5.03896e-95
CALML4	chr15	68190705	68206110	-	2.89807	4.94603	433.361	3.0161e-96	5.10876e-95
ADAT1	chr16	75596981	75623300	-	1.17519	3.75975	433.265	3.16421e-96	5.35636e-95
URB2	chr1	229626234	229660199	+	1.51448	4.03422	433.125	3.39364e-96	5.74124e-95
[truncated: 11,271 more rows]

## Sheet: Normal
gene	chrom	chromStart	chromEnd	strand	logFC	logCPM	LR	PValue	FDR
[truncated: 5,562 more rows]

## Sheet: curatedDiffuse
Symbol2	chrom	chromStart	chromEnd	strand	logFC	logCPM	LR	PValue	FDR	ensembl	gene	reliability	main_location	additional_location	extracellular_location	enhanced	supported	approved	uncertain	single_cell_var_intensity	single_cell_var_spatial	cell_cycle_dependency	go_id	Cell.Junctions	Cytosol	Microtubules	Mitochondria	Plasma.membrane	Vesicles	Nucleoplasm	Endoplasmic.reticulum	Nuclear.speckles	Golgi.apparatus	Nuclear.membrane	Intermediate.filaments	Nucleoli	Nucleoli.fibrillar.center	Actin.filaments	Nuclear.bodies	Lipid.droplets	Centrosome	Centriolar.satellite	Focal.adhesion.sites	Mitotic.spindle	Peroxisomes	Cytoplasmic.bodies	Endosomes	Lysosomes	Cytokinetic.bridge
[truncated: 1,659 more rows]
[truncated: 24 more columns]

[truncated: 1 more sheets: curatedIntestinal]
