# Supplementary material for: Gene Regulatory Network Characterization of Gastric Cancer’s Histological Subtypes: Distinctive Biological and Clinically Relevant Master Regulators
Source: Cancers (Basel). 2022 Oct 10;14(19):4961. doi: 10.3390/cancers14194961 (PMC9563962; doi:10.3390/cancers14194961)
Supplement: Supplementary file 1 [file cancers-14-04961-s001.zip › FileS2.xlsx]

## Sheet: Hallmark
ID	Description	GeneRatio	BgRatio	pvalue	p.adjust	qvalue	geneID	Count
HALLMARK_EPITHELIAL_MESENCHYMAL_TRANSITION	HALLMARK_EPITHELIAL_MESENCHYMAL_TRANSITION	73/339	200/4383	5.42443e-33	2.49524e-31	1.88427e-31	SGCD/MGP/MYLK/CALD1/FLNA/DPYSL3/FSTL1/ECM2/EMP3/WIPF1/VIM/RGS4/LUM/CAP2/PCOLCE/TNC/LGALS1/FBN1/GREM1/CDH11/THY1/VEGFC/COL3A1/FBLN2/BASP1/GLIPR1/IGFBP4/VCAM1/SFRP4/BGN/SPOCK1/ITGB3/COL6A3/HTRA1/MMP2/SGCB/PRRX1/SPARC/LOXL1/NOTCH2/LOX/TIMP1/COL5A1/COL1A2/DAB2/VCAN/FAP/PDGFRB/TGFB1/CD44/FN1/GPX7/SERPINE2/COL1A1/COL4A2/FAS/GJA1/TFPI2/POSTN/COL5A2/THBS2/TGFBI/NTM/COL12A1/SCG2/CTHRC1/SPP1/IL6/FOXC2/MATN…	73
HALLMARK_ALLOGRAFT_REJECTION	HALLMARK_ALLOGRAFT_REJECTION	62/339	200/4383	1.9121e-23	4.39783e-22	3.32101e-22	FLNA/LY86/PRKCB/TLR6/MAP4K1/WAS/FCGR2B/CD79A/CCL19/ELANE/SIT1/THY1/ST8SIA4/PTPRC/GPR65/TLR1/ETS1/CD28/F2R/CXCL13/CCL2/TIMP1/CD40LG/SPI1/CD4/ITGAL/TGFB1/TRAT1/SRGN/CCR5/LTB/ITGB2/FAS/CD3G/BCAT1/CCL13/IL12B/CD86/CD3D/TGFB2/CD2/HLA-DMB/IGSF6/HDAC9/CCR1/CD3E/CD96/IL12RB1/LCK/CRTAM/JAK2/CCL22/HLA-DRA/HLA-DOA/CCL5/NLRP3/CXCR3/SOCS1/CD74/IL6/CCND2/HLA-DQA1	62
HALLMARK_INFLAMMATORY_RESPONSE	HALLMARK_INFLAMMATORY_RESPONSE	42/339	200/4383	8.21111e-10	1.25904e-08	9.5076e-09	EMP3/AXL/TACR1/GPR183/EBI3/CD48/SELL/TLR1/ABCA1/ITGB3/MSR1/CCR7/P2RX7/LTA/C5AR1/CCL2/TIMP1/PDE4B/C3AR1/CMKLR1/PCDH7/GPR132/CYBB/KCNA3/RGS1/IL12B/CALCRL/CD14/APLNR/GP1BA/LCK/CHST2/CD70/CCL22/FPR1/RASGRP1/CCL5/NLRP3/TNFAIP6/OLR1/CCL17/IL6	42
HALLMARK_COMPLEMENT	HALLMARK_COMPLEMENT	36/339	200/4383	8.91943e-07	1.02573e-05	7.74582e-06	ZEB1/GNG2/GNB4/WAS/PIK3CG/TIMP2/CTSO/DGKG/DOCK10/GZMK/CR1/CR2/GNGT2/GATA3/TIMP1/CD40LG/SPOCK2/FN1/PLEK/COL4A2/C3/TFPI2/CTSL/APOBEC3G/GP1BA/C1QA/C1QC/LCK/JAK2/RASGRP1/CCL5/APOC1/OLR1/ITGAM/IL6/PHEX	36
HALLMARK_KRAS_SIGNALING_UP	HALLMARK_KRAS_SIGNALING_UP	35/339	200/4383	2.53125e-06	2.32875e-05	1.75855e-05	CD37/MAP4K1/SPON1/LAPTM5/LAT2/ADGRA2/IKZF1/LCP1/CCSER2/ITGBL1/SCG5/MAFB/ETS1/PECAM1/PRRX1/LY96/ALDH1A3/CXCR4/ENG/EPB41L3/RELN/NRP1/GPNMB/C3AR1/CMKLR1/ITGB2/PDCD1LG2/ALDH1A2/HDAC9/CSF2RA/TLR8/SPP1/CCND2/MYCN/ADAMDEC1	35
HALLMARK_IL6_JAK_STAT3_SIGNALING	HALLMARK_IL6_JAK_STAT3_SIGNALING	19/339	87/4383	2.43354e-05	0.000186572	0.000140889	A2M/EBI3/ITGB3/CXCL13/ITGA4/CSF2RB/TGFB1/CD44/LTB/FAS/CRLF2/CD14/CCR1/IL12RB1/IL9R/CSF2RA/SOCS1/CD38/IL6	19
HALLMARK_ANGIOGENESIS	HALLMARK_ANGIOGENESIS	11/339	36/4383	5.1939e-05	0.000341313	0.000257742	FSTL1/LUM/COL3A1/TIMP1/NRP1/VCAN/POSTN/COL5A2/OLR1/SPP1/CCND2	11
HALLMARK_IL2_STAT5_SIGNALING	HALLMARK_IL2_STAT5_SIGNALING	29/339	199/4383	0.000554143	0.00318632	0.00240615	CD79B/SYT11/BCL2/FGL2/NCS1/SELP/PENK/TLR7/ADAM19/RHOH/PRNP/GPR65/CD48/SELL/SWAP70/LRRC8C/CCR4/NRP1/CD44/LTB/CD83/CD86/EOMES/TIAM1/SOCS1/SPP1/GBP4/CST7/CCND2	29
HALLMARK_COAGULATION	HALLMARK_COAGULATION	22/339	138/4383	0.000771247	0.00394193	0.00297674	A2M/FBN1/CTSO/CTSK/ITGB3/HTRA1/PECAM1/MMP2/SPARC/TIMP1/SH2B2/FN1/LEFTY2/PLEK/C3/TFPI2/GP1BA/C1QA/APOC1/OLR1/APOC2/MMP7	22
HALLMARK_INTERFERON_GAMMA_RESPONSE	HALLMARK_INTERFERON_GAMMA_RESPONSE	27/339	200/4383	0.00272621	0.0125406	0.00947	SSPN/FGL2/SELP/GPR18/ST8SIA4/VCAM1/BANK1/CCL2/PDE4B/CSF2RB/CMKLR1/FAS/CD86/CIITA/JAK2/CD274/FPR1/CCL5/TNFAIP6/SOCS1/CD38/CD74/GBP4/FCGR1A/IL6/HLA-DQA1/IDO1	27
HALLMARK_APICAL_JUNCTION	HALLMARK_APICAL_JUNCTION	26/339	200/4383	0.00544666	0.0227769	0.0172	FLNC/PARVA/ACTG2/MSN/NRXN2/FBN1/CDH11/THY1/PTPRC/ACTN1/VCAM1/VCL/CNTN1/PECAM1/SDC3/MMP2/RAC2/VCAN/RRAS/CERCAM/CD86/MYH10/TGFBI/CD209/CD274/CALB2	26
HALLMARK_MYOGENESIS	HALLMARK_MYOGENESIS	25/339	200/4383	0.0104281	0.0399745	0.0301867	SGCD/MEF2C/MYLK/IGF1/PTGIS/MYH11/WWTR1/IGFBP7/SSPN/AEBP1/COL3A1/PRNP/GJA5/NOS1/MYBPH/SOD3/COL15A1/COL6A3/SPARC/PKIA/TGFB1/COL1A1/COL4A2/APLNR/ADAM12	25

## Sheet: Position
ID	Description	GeneRatio	BgRatio	pvalue	p.adjust	qvalue	geneID	Count
chr7q34	chr7q34	32/1316	176/38340	1.11382e-14	2.82911e-12	2.76697e-12	TRBV5-1/TRBV2/TRBV5-4/TRBV19/TRBV20-1/TRBV6-1/TRBC2/TRBV27/TRBV29-1/TRBV18/TRBV4-1/TRBV10-3/TRBV5-5/TRBV25-1/TRBV7-9/TRBV15/TRBV30/TRBV24-1/TRBV14/TRBV6-5/TRBV6-6/TRBV3-1/TRBV10-2/TRBV12-4/TRBV12-3/TRBV9/TRBV5-6/TRBV28/TRBV7-3/TRBV11-2/TRBV4-2/KEL	32
chr14q11	chr14q11	42/1316	311/38340	4.41858e-14	5.6116e-12	5.48834e-12	RNASE6/TRAC/TRAV27/TRAV5/RPL4P1/TRAV23DV6/TRAV9-2/TRAV8-2/TRAV1-1/TRAV1-2/TRAV2/TRAV4/TRAV8-3/TRAV8-4/TRAV3/TRAV26-1/TRAV29DV5/TRAV6/TRAV8-6/TRAV14DV4/TRAV25/TRAV17/TRAV8-1/TRAV20/RNASE2/TRAV12-1/TRAV13-2/TRAV13-1/TRAV35/TRAV12-2/TRAV22/TRAV21/CEBPE/TRAV12-3/TRAV19/TRAV10/TRAV38-1/TRAV36DV7/CPNE6/RNASE3/TRAV16/TRAV24	42
chr5q31	chr5q31	28/1316	279/38340	4.71412e-07	3.1768e-05	3.10702e-05	PCDHGA12/FGF1/PCDHGB7/PCDHGA2/PCDHGB6/SPOCK1/PCDHB18P/PCDHGA5/PCDHB7/PCDHB4/PCDHGA9/PCDHGA11/PCDHGA3/PCDHGA7/CD14/PCDHGA6/TGFBI/PCDHGA4/TIFAB/PCDHA10/PCDHB19P/IL5/PCDHGB2/MEIKIN/PCDHGC4/PCDHGB3/PCDHGB4/PCDHA13	28
chr1q23	chr1q23	23/1316	201/38340	5.00283e-07	3.1768e-05	3.10702e-05	FCER1A/FCRLA/CD1C/RGS4/FCRLB/FCGR2B/FCRL3/FCRL1/CD1E/ARHGAP30/CD48/SLAMF6/PYHIN1/OLFML2B/CD84/IFI16/FCRL6/PCP4L1/FCGR2A/FCRL4/MNDA/FCGR3A/AIM2	23
chr12p12	chr12p12	12/1316	103/38340	0.000219171	0.0111339	0.0108893	MGP/LRMP/ARHGDIB/ABCC9/SSPN/RASSF8/PDE3A/SPX/SLCO1C1/BCAT1/ART4/CENPUP2	12
chr4p14	chr4p14	8/1316	61/38340	0.00110546	0.0467977	0.0457698	TLR10/TLR6/TMEM156/TBC1D1/RHOH/KLHL5/TLR1/DTHD1	8

## Sheet: GO
ID	Description	GeneRatio	BgRatio	pvalue	p.adjust	qvalue	geneID	Count
GO_T_CELL_RECEPTOR_COMPLEX	GO_T_CELL_RECEPTOR_COMPLEX	74/1098	134/18046	2.26221e-54	1.17273e-50	8.81308e-51	TRAC/TRAV27/TRAV5/CD4/CD6/TRBV5-1/TRAV23DV6/TRBV2/TRAV9-2/TRAT1/TRAV8-2/TRAV1-1/TRAV1-2/TRAV2/TRAV4/TRBV5-4/TRBV19/TRBV20-1/TRBV6-1/TRAV8-3/TRBC2/CD3G/TRBV27/TRAV8-4/TRAV3/TRBV29-1/TRBV18/TRAV26-1/TRAV29DV5/TRBV4-1/TRGV3/CD3D/TRBV10-3/TRBV5-5/TRAV6/TRAV8-6/TRBV25-1/TRAV14DV4/TRAV25/TRBV7-9/TRAV17/TRAV8-1/TRBV30/TRBV24-1/TRAV20/TRBV14/CD3E/TRGV8/TRGV5/TRAV12-1/TRBV6-5/TRBV6-6/TRAV13-2/TRAV13-1/TRB…	74
GO_PLASMA_MEMBRANE_SIGNALING_RECEPTOR_COMPLEX	GO_PLASMA_MEMBRANE_SIGNALING_RECEPTOR_COMPLEX	100/1098	302/18046	3.13948e-47	8.13753e-44	6.11538e-44	CD79B/CHRNA3/TLR6/ITGA1/CD79A/SHISA8/ITGBL1/TLR1/ITGB3/ITGAD/GRIN2A/TRAC/RAMP2/TRAV27/ITGA4/TRAV5/CD4/ITGAL/CD6/CSF2RB/TRBV5-1/TRAV23DV6/CHRNB4/TRBV2/TRAV9-2/CHRNA6/TRAT1/TRAV8-2/TRAV1-1/TRAV1-2/TRAV2/TRAV4/ITGB2/TRBV5-4/TRBV19/TRBV20-1/TRBV6-1/TRAV8-3/TRBC2/CD3G/TRBV27/TRAV8-4/TRAV3/TRBV29-1/TRBV18/TRAV26-1/TRAV29DV5/TRBV4-1/TRGV3/CALCRL/CD3D/TRBV10-3/TRBV5-5/TRAV6/TRAV8-6/TRBV25-1/TRAV14DV4/TRA…	100
GO_REGULATION_OF_LYMPHOCYTE_ACTIVATION	GO_REGULATION_OF_LYMPHOCYTE_ACTIVATION	107/1098	491/18046	4.81824e-32	8.32592e-29	6.25695e-29	MEF2C/GLI3/IGF1/DTX1/CD22/ZEB1/BCL2/TNFRSF13C/AXL/CD19/CLECL1/FCGR2B/FCRL3/CCL19/NCKAP1L/FGL2/TESPA1/SASH3/LGALS1/CORO1A/SIT1/TLR9/THY1/GPR183/VAV1/RHOH/BTLA/PRNP/CD27/TAC1/PTPRC/LMO1/EBI3/TNFSF8/VCAM1/TNFAIP8L2/BANK1/CR1/CD28/PDE5A/CCR7/AIF1/GLI2/RAC2/GATA3/SPN/CCL2/DOCK8/IKZF3/CCL21/CD40LG/LST1/CD4/TNFSF13B/GPNMB/IGHV1OR15-1/CD6/TGFB1/TYROBP/TLR4/JAK3/CD83/TRBC2/PDCD1LG2/LILRB1/IL12B/CD86/HAVCR…	107
GO_LEUKOCYTE_CELL_CELL_ADHESION	GO_LEUKOCYTE_CELL_CELL_ADHESION	85/1098	343/18046	8.58889e-30	1.11312e-26	8.36513e-27	GLI3/IGF1/DTX1/TNFRSF13C/MSN/CLECL1/FCGR2B/CCL19/NCKAP1L/FGL2/TESPA1/SASH3/LGALS1/CORO1A/SELP/ELANE/CX3CR1/THY1/VAV1/RHOH/BTLA/PRNP/CD27/PTPRC/EBI3/SELL/VCAM1/ETS1/TNFAIP8L2/CD28/PDE5A/PECAM1/CCR7/AIF1/GLI2/RAC2/GATA3/SPN/CCL2/DOCK8/CCL21/CD40LG/ITGA4/ADD2/CD4/TNFSF13B/ITGAL/GPNMB/CD6/JAK3/CD44/ITGB2/CD83/CERCAM/PDCD1LG2/LILRB1/IL12B/CD86/SELPLG/HAVCR2/DUSP10/FERMT3/HLA-DMB/TIGIT/LAX1/CD3E/PLA2G2…	85
GO_T_CELL_ACTIVATION	GO_T_CELL_ACTIVATION	99/1098	468/18046	1.37095e-28	1.42141e-25	1.06819e-25	GLI3/IGF1/DTX1/ZEB1/CD1C/BCL2/TNFRSF13C/MSN/CLECL1/WAS/FCGR2B/PIK3CG/CCL19/NCKAP1L/FGL2/TESPA1/SASH3/LGALS1/CORO1A/GPR18/SIT1/THY1/GPR183/VAV1/RHOH/BTLA/PRNP/CD27/PIK3CD/PTPRC/LMO1/LCP1/EBI3/TNFSF8/MAFB/VCAM1/NLRC3/TNFAIP8L2/CR1/CD28/PDE5A/CCR7/AIF1/GLI2/RAC2/GATA3/P2RX7/SLAMF6/SPN/CCL2/DOCK8/CCL21/CD40LG/CD4/TNFSF13B/ITGAL/GPNMB/CD6/JAK3/CD44/CD83/CD3G/PDCD1LG2/LILRB1/IL12B/CD86/CD3D/HAVCR2/DUSP…	99
GO_REGULATION_OF_T_CELL_ACTIVATION	GO_REGULATION_OF_T_CELL_ACTIVATION	79/1098	318/18046	7.93764e-28	6.85812e-25	5.15389e-25	GLI3/IGF1/DTX1/ZEB1/TNFRSF13C/CLECL1/FCGR2B/CCL19/NCKAP1L/FGL2/TESPA1/SASH3/LGALS1/CORO1A/SIT1/THY1/VAV1/RHOH/BTLA/PRNP/CD27/PTPRC/LMO1/EBI3/TNFSF8/VCAM1/TNFAIP8L2/CR1/CD28/PDE5A/CCR7/AIF1/GLI2/RAC2/GATA3/SPN/CCL2/DOCK8/CCL21/CD40LG/CD4/TNFSF13B/GPNMB/CD6/JAK3/CD83/PDCD1LG2/LILRB1/IL12B/CD86/HAVCR2/DUSP10/CD2/HLA-DMB/TIGIT/LAX1/CD3E/PLA2G2D/CD209/IL12RB1/LCK/IL21/HLA-DPB1/CD70/CD274/HLA-DOA/RASGR…	79
GO_LEUKOCYTE_PROLIFERATION	GO_LEUKOCYTE_PROLIFERATION	76/1098	301/18046	2.6954e-27	1.99614e-24	1.5001e-24	GAPT/MEF2C/IGF1/CD22/BCL2/TNFRSF13C/MSN/CD19/CLECL1/MS4A1/FCGR2B/FCRL3/CD79A/PIK3CG/CCL19/NCKAP1L/SASH3/CORO1A/GREM1/TLR9/GPR183/CD180/PRNP/TAC1/PTPRC/LMO1/EBI3/TNFSF8/VCAM1/CD28/PDE5A/CR2/AIF1/RAC2/P2RX7/SPN/DOCK8/IKZF3/CD40LG/LST1/CD4/TNFSF13B/GPNMB/CD6/TYROBP/TLR4/JAK3/TREM2/PDCD1LG2/LILRB1/IL12B/CD86/HAVCR2/BST1/HLA-DMB/INPP5D/CD3E/PLA2G2D/IL34/MNDA/CD209/IL12RB1/IL21/HLA-DPB1/NPR3/CD70/CD274…	76
GO_POSITIVE_REGULATION_OF_CELL_ACTIVATION	GO_POSITIVE_REGULATION_OF_CELL_ACTIVATION	87/1098	394/18046	1.3402e-26	8.68451e-24	6.52643e-24	MEF2C/GLI3/IGF1/BCL2/TNFRSF13C/STAP1/AXL/CLECL1/TLR6/FCRL3/CCL19/NCKAP1L/TESPA1/SASH3/LGALS1/CORO1A/SELP/TLR9/THY1/GPR183/VAV1/RHOH/BTLA/CD27/TAC1/PTPRC/EBI3/VCAM1/CD28/CCR7/AIF1/GLI2/GATA3/CCL2/DOCK8/CCL21/CD40LG/CD4/TNFSF13B/IGHV1OR15-1/PDGFRB/CD6/TGFB1/TYROBP/TLR4/JAK3/TREM2/ITGB2/PLEK/CD83/TRBC2/PDCD1LG2/CRLF2/LILRB1/IL12B/CD86/HAVCR2/DUSP10/BST1/CD2/HLA-DMB/INPP5D/CD3E/CD209/IL12RB1/LCK/IL21…	87
GO_REGULATION_OF_LEUKOCYTE_PROLIFERATION	GO_REGULATION_OF_LEUKOCYTE_PROLIFERATION	63/1098	225/18046	1.82847e-25	1.0532e-22	7.9148e-23	MEF2C/IGF1/CD22/BCL2/TNFRSF13C/CLECL1/FCGR2B/FCRL3/CCL19/NCKAP1L/SASH3/CORO1A/GREM1/TLR9/GPR183/PRNP/TAC1/PTPRC/LMO1/EBI3/TNFSF8/VCAM1/CD28/PDE5A/AIF1/RAC2/SPN/IKZF3/CD40LG/LST1/CD4/TNFSF13B/GPNMB/CD6/TYROBP/TLR4/JAK3/PDCD1LG2/LILRB1/IL12B/CD86/HAVCR2/BST1/HLA-DMB/INPP5D/CD3E/PLA2G2D/MNDA/CD209/IL12RB1/IL21/HLA-DPB1/CD70/CD274/CCL5/IL5/CD38/CD74/IL6/HLA-DPA1/TNFSF18/CLC/IDO1	63
GO_POSITIVE_REGULATION_OF_LEUKOCYTE_CELL_CELL_ADHESION	GO_POSITIVE_REGULATION_OF_LEUKOCYTE_CELL_CELL_ADHESION	62/1098	219/18046	2.30396e-25	1.19438e-22	8.97576e-23	GLI3/IGF1/TNFRSF13C/CLECL1/CCL19/NCKAP1L/TESPA1/SASH3/LGALS1/CORO1A/ELANE/THY1/VAV1/RHOH/BTLA/CD27/PTPRC/EBI3/VCAM1/ETS1/CD28/CCR7/AIF1/GLI2/GATA3/CCL2/DOCK8/CCL21/CD40LG/ITGA4/CD4/TNFSF13B/CD6/JAK3/CD44/ITGB2/CD83/PDCD1LG2/LILRB1/IL12B/CD86/HAVCR2/DUSP10/HLA-DMB/CD3E/CD209/IL12RB1/LCK/IL21/HLA-DPB1/CD70/CD274/RASGRP1/CCL5/NLRP3/LILRB4/PDCD1/SOCS1/CD74/IL6/HLA-DPA1/EGR3	62
GO_COLLAGEN_CONTAINING_EXTRACELLULAR_MATRIX	GO_COLLAGEN_CONTAINING_EXTRACELLULAR_MATRIX	86/1098	408/18046	8.09398e-25	3.81447e-22	2.86659e-22	PRG4/CCDC80/MGP/OGN/COL14A1/SSC5D/ECM2/ASPN/COL6A6/LTBP1/THBS4/HMCN1/LUM/OMD/A2M/LAMA4/IGFBP7/PCOLCE/FGL2/TNC/LGALS1/SPON1/FBN1/GREM1/ELANE/COL8A1/ANGPTL2/TIMP2/ADAM19/AEBP1/GPC6/SFRP2/CDON/COL3A1/FBLN2/TNR/SOD3/TGM4/COL15A1/SRPX2/LTBP2/BGN/COL6A3/HTRA1/SDC3/MMP2/SPARC/LOXL1/TIMP1/COL5A1/COL1A2/VCAN/TGFB1/FN1/SERPINE2/COL1A1/LEFTY2/COL4A2/SULF1/NTN3/PXDN/CTSL/TGFB2/POSTN/COL5A2/SEMA7A/C1QA/C1QC/T…	86
GO_POSITIVE_REGULATION_OF_CELL_ADHESION	GO_POSITIVE_REGULATION_OF_CELL_ADHESION	85/1098	401/18046	1.02665e-24	4.43511e-22	3.333e-22	CCDC80/GLI3/IGF1/FLNA/ECM2/TNFRSF13C/CLECL1/CCL19/NCKAP1L/TESPA1/SASH3/LGALS1/CORO1A/ELANE/COL8A1/ADAM19/P2RY12/THY1/SFRP2/VAV1/RHOH/BTLA/PLEKHA2/CD27/FBLN2/PTPRC/EBI3/VCAM1/ETS1/CD28/CCR7/AIF1/CXCL13/GLI2/GATA3/CCL2/DOCK8/CCL21/CD40LG/NRP1/ITGA4/CD4/MYADM/TNFSF13B/CD6/SPOCK2/JAK3/CD44/FN1/ITGB2/DYSF/CD83/PDCD1LG2/LILRB1/IL12B/CD86/HAVCR2/TGFB2/DUSP10/HLA-DMB/CASS4/CD3E/CD209/IL12RB1/LCK/IL21/HLA…	85
GO_REGULATION_OF_CELL_CELL_ADHESION	GO_REGULATION_OF_CELL_CELL_ADHESION	86/1098	411/18046	1.37746e-24	5.4929e-22	4.12793e-22	GLI3/IGF1/DTX1/PRKG1/TNFRSF13C/CLECL1/FCGR2B/CCL19/NCKAP1L/FGL2/TESPA1/SASH3/LGALS1/CORO1A/ELANE/ADAM19/THY1/VAV1/RHOH/BTLA/PRNP/CD27/PTPRC/TNR/EBI3/VCAM1/ETS1/TNFAIP8L2/SWAP70/CD28/PDE5A/CCR7/AIF1/CXCL13/GLI2/GATA3/SPN/CCL2/DOCK8/CCL21/CD40LG/ITGA4/CD4/MYADM/TNFSF13B/GPNMB/CD6/TGFB1/JAK3/CD44/SERPINE2/ITGB2/CD83/PDCD1LG2/LILRB1/IL12B/CD86/HAVCR2/DUSP10/FERMT3/HLA-DMB/TIGIT/LAX1/CD3E/PLA2G2D/CD20…	86
GO_EXTERNAL_SIDE_OF_PLASMA_MEMBRANE	GO_EXTERNAL_SIDE_OF_PLASMA_MEMBRANE	83/1098	388/18046	1.95937e-24	7.25528e-22	5.45236e-22	CD79B/IL31RA/CD1C/TNFRSF13C/CD19/MS4A1/FCGR2B/ITGA1/HEG1/CD79A/SELP/FCER2/CX3CR1/P2RY12/THY1/FOLR2/IGSF21/PRNP/CD27/PTPRC/CD1E/EBI3/SELL/VCAM1/ABCA1/CD28/PECAM1/CCR7/P2RX7/ANTXR1/CXCR4/ENG/ANTXR2/CD40LG/CCR4/CD4/CD248/CD163L1/IGHV1OR15-1/CD6/TLR4/CD200R1/CCR5/FCRL6/SERPINE2/ITGB2/CDH5/CD83/PRND/TRBC2/CD3G/PDCD1LG2/CRLF2/LILRB1/IL12B/CD86/TRGV3/CD14/CD3D/GP1BA/CD2/SEMA7A/CCR1/CD3E/TRGV8/TRGV5/CXCR…	83
GO_POSITIVE_REGULATION_OF_CELL_CELL_ADHESION	GO_POSITIVE_REGULATION_OF_CELL_CELL_ADHESION	65/1098	259/18046	2.43926e-23	8.4301e-21	6.33524e-21	GLI3/IGF1/TNFRSF13C/CLECL1/CCL19/NCKAP1L/TESPA1/SASH3/LGALS1/CORO1A/ELANE/ADAM19/THY1/VAV1/RHOH/BTLA/CD27/PTPRC/EBI3/VCAM1/ETS1/CD28/CCR7/AIF1/CXCL13/GLI2/GATA3/CCL2/DOCK8/CCL21/CD40LG/ITGA4/CD4/TNFSF13B/CD6/JAK3/CD44/ITGB2/CD83/PDCD1LG2/LILRB1/IL12B/CD86/HAVCR2/DUSP10/HLA-DMB/CD3E/CD209/IL12RB1/LCK/IL21/HLA-DPB1/CD70/CD274/RASGRP1/CCL5/NLRP3/LILRB4/PDCD1/SOCS1/CD74/IL6/HLA-DPA1/EGR3/MEGF10	65
GO_EXTRACELLULAR_STRUCTURE_ORGANIZATION	GO_EXTRACELLULAR_STRUCTURE_ORGANIZATION	78/1098	373/18046	2.27818e-22	7.38131e-20	5.54707e-20	CCDC80/COL14A1/FLRT2/ECM2/MYH11/LUM/A2M/LAMA4/ITGA1/TNC/FBN1/GREM1/ELANE/COL8A1/TIMP2/ADAM19/AEBP1/SFRP2/COL3A1/FBLN2/LCP1/TNR/VCAM1/CTSK/COL15A1/ETS1/SH3PXD2B/BGN/ITGB3/COL6A3/HTRA1/PECAM1/MMP2/SPARC/LOXL1/ITGAD/ANTXR1/LOX/RAMP2/ENG/TIMP1/MMP16/COL5A1/COL1A2/ITGA4/VCAN/ITGAL/FAP/TGFB1/SPOCK2/CD44/FN1/COL1A1/ITGB2/COL4A2/SULF1/PXDN/CTSL/TGFB2/POSTN/COL5A2/TGFBI/WT1/AGT/COL12A1/ITGA11/SPP1/ADAMTS2…	78
GO_LYMPHOCYTE_DIFFERENTIATION	GO_LYMPHOCYTE_DIFFERENTIATION	75/1098	354/18046	6.60953e-22	2.01552e-19	1.51467e-19	CD79B/POU2F2/GLI3/DTX1/ZEB1/LYL1/BCL2/AXL/CD19/MS4A1/FCGR2B/FCRL3/CD79A/CCL19/PLCG2/NCKAP1L/FGL2/TESPA1/SASH3/LGALS1/GPR18/TLR9/GPR183/VAV1/RHOH/CD27/PIK3CD/PTPRC/IKZF1/TNFSF8/MAFB/VCAM1/DOCK10/CR1/CD28/CR2/CCR7/GLI2/GATA3/DOCK11/SLAMF6/NOTCH2/SPN/IKZF3/CD40LG/ITGA4/SPI1/CD4/JAK3/CD83/CD3G/IL12B/CD86/CD3D/DUSP10/EOMES/CD2/HDAC9/THEMIS/AICDA/INPP5D/CD3E/NFAM1/PLA2G2D/IL12RB1/LCK/HLA-DOA/RASGRP1/NL…	75
GO_IMMUNE_RESPONSE_REGULATING_CELL_SURFACE_RECEPTOR_SIGNALING_PATHWAY	GO_IMMUNE_RESPONSE_REGULATING_CELL_SURFACE_RECEPTOR_SIGNALING_PATHWAY	89/1098	500/18046	2.30009e-20	6.62427e-18	4.97816e-18	CD79B/MEF2C/FCER1A/RFTN1/CD22/PRKCB/WIPF1/BCL2/STAP1/CD19/MS4A1/WAS/FCGR2B/LPXN/FCRL3/CD79A/PLCG2/NCKAP1L/TESPA1/ELMO1/LILRA4/LAT2/THY1/VAV1/PVRIG/BTLA/MYO1G/PRNP/PIK3CD/PTPRC/CR1/CD28/CR2/CCR7/PAX5/GATA3/CMTM3/TRAC/C5AR1/NFATC1/CD4/PDE4B/SH2B2/C3AR1/IGHV1OR15-1/CLEC4C/TRAT1/THEMIS2/CD200R1/NCR3/CMKLR1/TRBC2/CD3G/FPR3/TRAV8-4/LILRB1/HLA-DQA2/TRAV29DV5/CD3D/UBASH3A/FCGR2A/HLA-DQB2/TRBV7-9/THEMIS/I…	89
GO_POSITIVE_REGULATION_OF_LEUKOCYTE_PROLIFERATION	GO_POSITIVE_REGULATION_OF_LEUKOCYTE_PROLIFERATION	43/1098	140/18046	1.8171e-19	4.95781e-17	3.72581e-17	MEF2C/IGF1/BCL2/TNFRSF13C/CLECL1/FCRL3/CCL19/NCKAP1L/SASH3/CORO1A/TLR9/GPR183/TAC1/PTPRC/EBI3/VCAM1/CD28/AIF1/CD40LG/CD4/TNFSF13B/CD6/TLR4/JAK3/PDCD1LG2/IL12B/CD86/HAVCR2/BST1/HLA-DMB/CD3E/CD209/IL12RB1/IL21/HLA-DPB1/CD70/CD274/CCL5/IL5/CD38/CD74/IL6/HLA-DPA1	43
GO_T_CELL_PROLIFERATION	GO_T_CELL_PROLIFERATION	48/1098	187/18046	5.46657e-18	1.41693e-15	1.06483e-15	IGF1/TNFRSF13C/MSN/CLECL1/PIK3CG/CCL19/NCKAP1L/SASH3/CORO1A/PRNP/PTPRC/LMO1/EBI3/TNFSF8/VCAM1/CD28/PDE5A/AIF1/RAC2/P2RX7/SPN/DOCK8/CD40LG/CD4/TNFSF13B/GPNMB/CD6/JAK3/PDCD1LG2/LILRB1/IL12B/CD86/HAVCR2/HLA-DMB/CD3E/PLA2G2D/CD209/IL12RB1/IL21/HLA-DPB1/CD70/CD274/CCL5/IL6/HLA-DPA1/TNFSF18/CLC/IDO1	48
GO_B_CELL_ACTIVATION	GO_B_CELL_ACTIVATION	62/1098	311/18046	6.06657e-17	1.49758e-14	1.12543e-14	CD79B/GAPT/MEF2C/POU2F2/CD22/LYL1/PRKCB/BCL2/TNFRSF13C/CD19/MS4A1/FCGR2B/FCRL3/CD79A/FCRL1/PLCG2/NCKAP1L/SASH3/LGALS1/LAT2/TLR9/GPR183/CD180/CD27/PIK3CD/PTPRC/VCAM1/DOCK10/BANK1/SWAP70/CD28/CR2/DOCK11/NOTCH2/IKZF3/CD40LG/ITGA4/TNFSF13B/IGHV1OR15-1/TGFB1/TYROBP/TLR4/JAK3/TRBC2/BST1/HDAC9/SAMSN1/AICDA/INPP5D/LAX1/NFAM1/MNDA/CXCR5/IL21/CD70/IGHG4/IL5/CD38/CD74/IL6/IGHV1-69-2/IGHV3-20	62
GO_ANTIGEN_RECEPTOR_MEDIATED_SIGNALING_PATHWAY	GO_ANTIGEN_RECEPTOR_MEDIATED_SIGNALING_PATHWAY	62/1098	312/18046	7.13812e-17	1.682e-14	1.26403e-14	CD79B/MEF2C/RFTN1/CD22/PRKCB/BCL2/STAP1/CD19/MS4A1/WAS/FCGR2B/LPXN/FCRL3/CD79A/PLCG2/NCKAP1L/TESPA1/LAT2/THY1/PVRIG/PRNP/PIK3CD/PTPRC/CD28/CCR7/PAX5/GATA3/CMTM3/TRAC/CD4/PDE4B/SH2B2/IGHV1OR15-1/TRAT1/THEMIS2/TRBC2/CD3G/TRAV8-4/HLA-DQA2/TRAV29DV5/CD3D/UBASH3A/HLA-DQB2/TRBV7-9/THEMIS/INPP5D/LAX1/CD3E/NFAM1/MNDA/LCK/HLA-DPB1/HLA-DRA/IGHG4/LILRB4/TRBV12-3/CD38/TRAV19/HLA-DPA1/IGHV1-69-2/HLA-DQA1/IGHV…	62
GO_EXTRACELLULAR_MATRIX_STRUCTURAL_CONSTITUENT	GO_EXTRACELLULAR_MATRIX_STRUCTURAL_CONSTITUENT	43/1098	165/18046	1.62788e-16	3.66909e-14	2.75733e-14	PRG4/MGP/OGN/COL14A1/ASPN/COL6A6/LTBP1/HMCN1/LUM/LAMA4/IGFBP7/PCOLCE/FGL2/TNC/SPON1/FBN1/COL8A1/AEBP1/COL3A1/FBLN2/COL15A1/SRPX2/LTBP2/BGN/COL6A3/SPARC/COL5A1/COL1A2/CD4/VCAN/FN1/COL1A1/COL4A2/TFPI2/PXDN/POSTN/COL5A2/THBS2/TGFBI/COL12A1/CTHRC1/MATN2/COL10A1	43
GO_POSITIVE_REGULATION_OF_CYTOKINE_PRODUCTION	GO_POSITIVE_REGULATION_OF_CYTOKINE_PRODUCTION	78/1098	468/18046	2.75919e-16	5.95985e-14	4.47884e-14	LUM/TLR6/HEG1/CCL19/PLCG2/SASH3/ELANE/SCIMP/TLR7/TLR9/PTPRC/CD200/GPSM3/EBI3/TLR1/CD28/CLEC9A/CCR7/LY96/F2R/AIF1/GATA3/P2RX7/SLAMF6/ZBTB20/LTA/PYHIN1/C5AR1/AGTR2/SPN/CD40LG/IFI16/CD4/PDE4B/C3AR1/CD6/TGFB1/TYROBP/TLR4/TREM2/TRIM6/LTB/CD83/CYBB/C3/SULF1/CRLF2/LILRB1/IL12B/CD86/CD14/HAVCR2/POSTN/CD2/SEMA7A/TIGIT/HTR2B/CD3E/NFAM1/MNDA/IL12RB1/IL21/HLA-DPB1/AGT/CRTAM/JAK2/CD274/RASGRP1/NLRP3/TWIST1/TL…	78
GO_POSITIVE_REGULATION_OF_T_CELL_PROLIFERATION	GO_POSITIVE_REGULATION_OF_T_CELL_PROLIFERATION	32/1098	96/18046	5.48954e-16	1.13831e-13	8.55443e-14	IGF1/TNFRSF13C/CLECL1/CCL19/NCKAP1L/SASH3/CORO1A/PTPRC/EBI3/VCAM1/CD28/AIF1/CD40LG/CD4/TNFSF13B/CD6/JAK3/PDCD1LG2/IL12B/CD86/HAVCR2/HLA-DMB/CD3E/CD209/IL12RB1/IL21/HLA-DPB1/CD70/CD274/CCL5/IL6/HLA-DPA1	32
GO_CELL_CHEMOTAXIS	GO_CELL_CHEMOTAXIS	59/1098	306/18046	1.72321e-15	3.43582e-13	2.58203e-13	PARVA/STAP1/THBS4/FGF1/CNR2/ITGA1/PIK3CG/CCL19/NCKAP1L/CORO1A/GREM1/GPR18/CX3CR1/VEGFC/GPR183/VAV1/PIK3CD/GPSM3/VCAM1/SWAP70/BIN2/CCR7/AIF1/CXCL13/RAC2/C5AR1/LOX/CXCR4/CCL2/CCL21/CCR4/NRP1/CYP7B1/PDE4B/C3AR1/PDGFRB/CCR5/CMKLR1/ITGB2/DYSF/CAMK1D/CCL13/TGFB2/BST1/CCR1/CXCR5/CCL26/CCL22/CCL5/CXCR3/SCG2/TIAM1/CCL17/CD74/CCR9/IL6/CYP19A1/EGR3/XCL2	59
GO_REGULATION_OF_CHEMOTAXIS	GO_REGULATION_OF_CHEMOTAXIS	48/1098	216/18046	2.62263e-15	5.03545e-13	3.78415e-13	STAP1/THBS4/FGF1/PLXNA4/CCL19/NCKAP1L/GREM1/ELANE/GPR18/ADGRA2/P2RY12/VEGFC/GPR183/SUCNR1/GPSM3/SWAP70/ROBO1/CCR7/AIF1/CXCL13/RAC2/C5AR1/CXCR4/CCL2/CCL21/CCR4/NRP1/C3AR1/PDGFRB/TGFB1/TREM2/CMKLR1/DYSF/CAMK1D/SEMA6B/BST1/SEMA3C/SEMA7A/CCR1/CCL26/CCL5/SCG2/TIAM1/CD74/IL6/CYP19A1/XCL2/SEMA3A	48
GO_NEGATIVE_REGULATION_OF_IMMUNE_SYSTEM_PROCESS	GO_NEGATIVE_REGULATION_OF_IMMUNE_SYSTEM_PROCESS	77/1098	481/18046	4.17768e-15	7.73468e-13	5.81263e-13	GLI3/IL31RA/DTX1/MILR1/CD22/SYT11/STAP1/AXL/CNR2/TLR6/A2M/FCRLB/FCGR2B/LPXN/FCRL3/FGL2/FBN1/GREM1/LILRA4/GPR18/TLR9/THY1/PVRIG/COL3A1/PRNP/PTPRC/CD200/MAFB/NLRC3/TNFAIP8L2/BANK1/CR1/PDE5A/HTRA1/LY96/SPN/CCL2/CD84/CCL21/IFI16/LST1/GPNMB/TGFB1/TYROBP/TLR4/JAK3/CD200R1/PDCD1LG2/LILRB1/BPI/IL12B/CD86/CD14/HAVCR2/TGFB2/UBASH3A/DUSP10/SAMSN1/TIGIT/C1QC/INPP5D/LAX1/PLA2G2D/MNDA/CD96/ADORA1/CD274/HLA-DOA…	77
GO_IMMUNE_RECEPTOR_ACTIVITY	GO_IMMUNE_RECEPTOR_ACTIVITY	36/1098	129/18046	4.6909e-15	8.31241e-13	6.2468e-13	IL31RA/FCGR2B/CX3CR1/EBI3/CR1/CR2/CCR7/C5AR1/CXCR4/CCR4/CD4/IL21R/C3AR1/CSF2RB/CD200R1/CD44/CCR5/CMKLR1/CRLF2/LILRB1/HLA-DQA2/IL12B/HLA-DQB2/CCR1/CXCR5/IL12RB1/IL9R/HLA-DRA/HLA-DOA/CXCR3/CSF2RA/CD74/CCR9/HLA-DPA1/KIR3DL1/HLA-DQA1	36
GO_RESPONSE_TO_MOLECULE_OF_BACTERIAL_ORIGIN	GO_RESPONSE_TO_MOLECULE_OF_BACTERIAL_ORIGIN	64/1098	358/18046	4.81042e-15	8.31241e-13	6.2468e-13	MEF2C/LY86/SSC5D/STAP1/AXL/VIM/CNR2/TLR6/FCGR2B/PLCG2/SELP/ELANE/PENK/SCIMP/TLR9/CX3CR1/FMO1/CD180/TAC1/C4B/NOS1/VCAM1/TLR1/ABCA1/CCR7/SPARC/LY96/LOXL1/F2R/CXCL13/P2RX7/LTA/C5AR1/CCL2/PDE4B/CD6/CSF2RB/TGFB1/TLR4/TREM2/TRIM6/CCR5/HAMP/GJA1/PDCD1LG2/LILRB1/BPI/IL12B/CD86/CD14/HAVCR2/DUSP10/KMO/AICDA/MRC1/CD96/JAK2/CD274/CCL5/NLRP3/CEBPE/IL6/GPR31/IDO1	64
GO_CELL_CELL_ADHESION_VIA_PLASMA_MEMBRANE_ADHESION_MOLECULES	GO_CELL_CELL_ADHESION_VIA_PLASMA_MEMBRANE_ADHESION_MOLECULES	54/1098	274/18046	1.06211e-14	1.77612e-12	1.33476e-12	PCDHGA12/FAT4/HMCN1/PCDH10/PCDHGB7/SELP/CDH11/GPC6/IGSF21/PCDHGA2/SELL/VCAM1/PCDHGB6/ROBO1/PECAM1/PCDHB18P/PCDHGA5/PCDHB7/PCDHB4/CD84/PCDHGA9/NTNG2/TENM4/MYADM/ITGAL/PCDH18/CD6/PCDHGA11/PCDHGA3/PCDHGA7/PCDH7/ITGB2/CDH5/SCARF2/PCDH17/TGFB2/PCDHGA6/LRRC4C/IL1RAPL1/PCDH19/CRB2/CD209/PCDHGA4/PCDHA10/PCDH11X/PCDHGB2/ITGAM/PCDHGC4/PCDHGB3/PCDHGB4/CRB1/TENM2/TENM3/PCDHA13	54
GO_B_CELL_PROLIFERATION	GO_B_CELL_PROLIFERATION	30/1098	95/18046	2.34787e-14	3.80355e-12	2.85838e-12	GAPT/MEF2C/CD22/BCL2/TNFRSF13C/CD19/MS4A1/FCGR2B/FCRL3/CD79A/NCKAP1L/SASH3/TLR9/GPR183/CD180/PTPRC/CR2/IKZF3/CD40LG/TNFSF13B/TYROBP/TLR4/BST1/INPP5D/MNDA/IL21/CD70/IL5/CD38/CD74	30
GO_T_CELL_DIFFERENTIATION	GO_T_CELL_DIFFERENTIATION	49/1098	240/18046	4.4677e-14	7.01835e-12	5.27431e-12	GLI3/DTX1/ZEB1/BCL2/CCL19/NCKAP1L/FGL2/TESPA1/SASH3/GPR18/GPR183/VAV1/RHOH/CD27/PIK3CD/PTPRC/TNFSF8/MAFB/CR1/CD28/CCR7/GLI2/GATA3/SLAMF6/SPN/CD4/JAK3/CD83/CD3G/IL12B/CD86/CD3D/DUSP10/EOMES/CD2/THEMIS/CD3E/PLA2G2D/IL12RB1/LCK/HLA-DOA/RASGRP1/NLRP3/LILRB4/SOCS1/CD74/CCR9/IL6/EGR3	49
GO_LEUKOCYTE_CHEMOTAXIS	GO_LEUKOCYTE_CHEMOTAXIS	47/1098	224/18046	5.08407e-14	7.75172e-12	5.82543e-12	STAP1/THBS4/CNR2/ITGA1/PIK3CG/CCL19/NCKAP1L/CORO1A/GREM1/GPR18/VEGFC/GPR183/VAV1/PIK3CD/GPSM3/SWAP70/CCR7/AIF1/CXCL13/RAC2/C5AR1/CXCR4/CCL2/CCL21/CYP7B1/PDE4B/C3AR1/CCR5/CMKLR1/ITGB2/DYSF/CAMK1D/CCL13/TGFB2/BST1/CCR1/CXCR5/CCL26/CCL22/CCL5/CXCR3/SCG2/CCL17/CD74/IL6/CYP19A1/XCL2	47
GO_LYMPHOCYTE_MEDIATED_IMMUNITY	GO_LYMPHOCYTE_MEDIATED_IMMUNITY	61/1098	351/18046	7.96483e-14	1.17971e-11	8.86551e-12	GAPT/POU2F2/IL31RA/RFTN1/CD1C/CD19/WAS/FCGR2B/FGL2/SASH3/CORO1A/FCER2/VAV1/C4A/MYO1G/CD27/PTPRC/CD1E/C4B/SWAP70/CR1/CD28/CR2/GATA3/P2RX7/SLAMF6/LTA/CD40LG/IGHV1OR15-1/TGFB1/SH2D1A/NCR3/C3/TRBC2/LILRB1/IL12B/HAVCR2/C1QA/C1QC/AICDA/INPP5D/CD96/C1QB/IL12RB1/IL21/CRTAM/CD70/IGHG4/RASGRP1/NLRP3/TLR8/CD74/CLNK/IGKV2D-30/IL6/KIR3DL1/IGKV2-29/IGHV1-69-2/IGHV3-20/IGKV4-1/CLC	61
GO_ADAPTIVE_IMMUNE_RESPONSE_BASED_ON_SOMATIC_RECOMBINATION_OF_IMMUNE_RECEPTORS_BUILT_FROM_IMMUNOGLOBULIN_SUPERFAMILY_DOMAINS	GO_ADAPTIVE_IMMUNE_RESPONSE_BASED_ON_SOMATIC_RECOMBINATION_OF_IMMUNE_RECEPTORS_BUILT_FROM_IMMUNOGLOBULIN_SUPERFAMILY_DOMAINS	61/1098	352/18046	9.08263e-14	1.3079e-11	9.82889e-12	GAPT/MEF2C/POU2F2/IL31RA/RFTN1/CD1C/CD19/WAS/FCGR2B/CCL19/FGL2/SASH3/FCER2/C4A/MYO1G/CD27/PTPRC/CD1E/C4B/EBI3/SWAP70/CR1/CD28/CR2/CXCL13/GATA3/P2RX7/SLAMF6/LTA/SPN/CD40LG/CD4/TNFSF13B/IGHV1OR15-1/TGFB1/TLR4/JAK3/C3/TRBC2/LILRB1/IL12B/HAVCR2/C1QA/C1QC/AICDA/INPP5D/C1QB/IL12RB1/CD70/CD274/IGHG4/NLRP3/TLR8/CD74/IGKV2D-30/IL6/IGKV2-29/IGHV1-69-2/IGHV3-20/IGKV4-1/CLC	61
GO_REGULATION_OF_LEUKOCYTE_DIFFERENTIATION	GO_REGULATION_OF_LEUKOCYTE_DIFFERENTIATION	52/1098	276/18046	2.17617e-13	3.04898e-11	2.29132e-11	GLI3/RASSF2/DTX1/ZEB1/AXL/FCGR2B/FCRL3/CCL19/NCKAP1L/FGL2/TESPA1/SASH3/FBN1/TLR9/RHOH/CD27/PTPRC/EVI2B/MAFB/CR1/CD28/GLI2/GATA3/NOTCH2/IKZF3/CD4/TGFB1/TYROBP/TLR4/JAK3/TREM2/CD83/LILRB1/IL12B/CD86/DUSP10/CD2/C1QC/CCR1/INPP5D/NFAM1/IL34/IL12RB1/HLA-DOA/RASGRP1/NLRP3/LILRB4/SLC9B2/SOCS1/IL5/CD74/EGR3	52
GO_MACROPHAGE_ACTIVATION	GO_MACROPHAGE_ACTIVATION	29/1098	96/18046	2.29402e-13	3.12953e-11	2.35185e-11	IL31RA/SYT11/STAP1/PJA2/TLR6/FCGR2B/TLR7/PTPRC/SUCNR1/CD200/TLR1/AIF1/C5AR1/TYROBP/MAPT/TLR4/TREM2/ITGB2/DYSF/CD93/BPI/HAVCR2/C1QA/JAK2/TLR8/CD74/ITGAM/IL6/CST7	29
GO_REGULATION_OF_IMMUNE_EFFECTOR_PROCESS	GO_REGULATION_OF_IMMUNE_EFFECTOR_PROCESS	70/1098	455/18046	5.59567e-13	7.43794e-11	5.58963e-11	CD22/CD1C/CD19/A2M/WAS/FCGR2B/FCRL3/CCL19/FGL2/SASH3/SCIMP/FCER2/TLR9/VAV1/C4A/PTPRC/CD1E/C4B/CR1/CD28/HTRA1/CR2/RAC2/GATA3/P2RX7/SLAMF6/LTA/C5AR1/CD84/CD40LG/C3AR1/IGHV1OR15-1/TGFB1/SH2D1A/TLR4/JAK3/TRIM6/NCR3/ITGB2/C3/LILRB1/APOBEC3G/IL12B/CD86/HAVCR2/TGFB2/DUSP10/SEMA7A/HLA-DMB/C1QA/C1QC/TRIL/CD96/C1QB/IL12RB1/IL21/CRTAM/IGHG4/RASGRP1/NLRP3/IL5/CD74/CLNK/ITGAM/IGKV2D-30/IL6/IGKV2-29/AIM2/IGKV4…	70
GO_REGULATION_OF_LEUKOCYTE_MIGRATION	GO_REGULATION_OF_LEUKOCYTE_MIGRATION	42/1098	197/18046	6.44437e-13	8.35191e-11	6.27648e-11	STAP1/THBS4/MSN/CCL19/NCKAP1L/GREM1/SELP/ELANE/GPR18/CX3CR1/P2RY12/THY1/VEGFC/CD200/GPSM3/SWAP70/CCR7/AIF1/CXCL13/RAC2/C5AR1/SPN/CCL2/DOCK8/CCL21/ITGA4/C3AR1/CD200R1/TREM2/CMKLR1/DYSF/CAMK1D/BST1/CCR1/ADORA1/CCL5/CXCR3/CD74/IL6/CYP19A1/XCL2/TNFSF18	42
GO_MYELOID_LEUKOCYTE_MIGRATION	GO_MYELOID_LEUKOCYTE_MIGRATION	43/1098	212/18046	2.04273e-12	2.58281e-10	1.94099e-10	STAP1/THBS4/ITGA1/PIK3CG/CCL19/NCKAP1L/GREM1/CX3CR1/P2RY12/VEGFC/VAV1/PIK3CD/CD200/SWAP70/PECAM1/CCR7/AIF1/CXCL13/RAC2/C5AR1/CCL2/CCL21/PDE4B/C3AR1/CD200R1/TREM2/CMKLR1/ITGB2/DYSF/CAMK1D/CCL13/TGFB2/BST1/CCR1/CCL26/CCL22/CCL5/SCG2/CCL17/CD74/IL6/CYP19A1/XCL2	43
GO_REGULATION_OF_B_CELL_PROLIFERATION	GO_REGULATION_OF_B_CELL_PROLIFERATION	22/1098	61/18046	3.28907e-12	4.05965e-10	3.05083e-10	MEF2C/CD22/BCL2/TNFRSF13C/FCGR2B/FCRL3/NCKAP1L/SASH3/TLR9/GPR183/PTPRC/IKZF3/TNFSF13B/TYROBP/TLR4/BST1/INPP5D/MNDA/IL21/IL5/CD38/CD74	22
GO_REGULATION_OF_CYTOSOLIC_CALCIUM_ION_CONCENTRATION	GO_REGULATION_OF_CYTOSOLIC_CALCIUM_ION_CONCENTRATION	59/1098	369/18046	7.74816e-12	9.34104e-10	7.01981e-10	P2RY8/HTR2A/SLC8A1/ATP2B4/BCL2/CD52/AKAP6/CYSLTR1/CD19/MS4A1/LPAR4/PIK3CG/CCL19/PLCG2/TACR1/CORO1A/NCS1/CLIC2/GPR18/CX3CR1/EDNRA/THY1/CACNA2D1/PRNP/TAC1/PTPRC/S1PR3/GPR65/NOS1/P2RY10/SWAP70/CCR7/F2R/CXCL13/P2RX7/GRIN2A/C5AR1/CXCR4/CCL21/CCR4/CD4/C3AR1/CCR5/CMKLR1/FPR3/GJA1/APLNR/CCR1/HTR2B/CXCR5/LCK/ADORA1/AGT/JAK2/FPR1/CXCR3/CALB2/CD38/CCR9	59
GO_NEGATIVE_REGULATION_OF_CELL_ACTIVATION	GO_NEGATIVE_REGULATION_OF_CELL_ACTIVATION	41/1098	204/18046	9.08228e-12	1.07006e-09	8.04151e-10	GLI3/IL31RA/DTX1/MILR1/SYT11/PRKG1/AXL/CNR2/FCGR2B/FGL2/PRNP/PTPRC/CD200/TNFAIP8L2/BANK1/PDE5A/SPN/CD84/LST1/GPNMB/TYROBP/JAK3/SERPINE2/PDCD1LG2/LILRB1/BPI/CD86/HAVCR2/SAMSN1/TIGIT/INPP5D/LAX1/APOE/PLA2G2D/MNDA/CD274/SOCS1/CD74/CLNK/CST7/IDO1	41
GO_INTERFERON_GAMMA_PRODUCTION	GO_INTERFERON_GAMMA_PRODUCTION	29/1098	112/18046	1.64398e-11	1.89386e-09	1.42324e-09	AXL/SASH3/TLR7/TLR9/PRNP/EBI3/CCR7/GATA3/SLAMF6/LTA/SPN/PDE4B/TLR4/PDCD1LG2/LILRB1/IL12B/CD14/HAVCR2/EOMES/CD2/CD3E/CD96/IL12RB1/IL21/HLA-DPB1/CD274/RASGRP1/TLR8/HLA-DPA1	29
GO_POSITIVE_REGULATION_OF_CHEMOTAXIS	GO_POSITIVE_REGULATION_OF_CHEMOTAXIS	32/1098	135/18046	1.90872e-11	2.15105e-09	1.61652e-09	THBS4/CCL19/NCKAP1L/P2RY12/VEGFC/SUCNR1/GPSM3/SWAP70/CCR7/AIF1/CXCL13/RAC2/C5AR1/CXCR4/CCL21/CCR4/NRP1/C3AR1/PDGFRB/TGFB1/TREM2/CMKLR1/DYSF/CAMK1D/CCR1/CCL26/CCL5/SCG2/TIAM1/CD74/IL6/XCL2	32
GO_CYTOKINE_BINDING	GO_CYTOKINE_BINDING	31/1098	129/18046	2.69528e-11	2.97283e-09	2.23409e-09	IL31RA/LTBP1/A2M/GREM1/NRP2/ELANE/CX3CR1/NRROS/EBI3/ITGB3/CCR7/CXCR4/ENG/CCR4/NRP1/ITGA4/CD4/CCR5/CD93/CRLF2/PXDN/IL12B/CCR1/CXCR5/IL12RB1/CD109/GDF5/CXCR3/CSF2RA/CD74/CCR9	31
GO_POSITIVE_REGULATION_OF_CYTOKINE_BIOSYNTHETIC_PROCESS	GO_POSITIVE_REGULATION_OF_CYTOKINE_BIOSYNTHETIC_PROCESS	22/1098	67/18046	2.83506e-11	3.06186e-09	2.301e-09	TLR6/ELANE/TLR7/TLR9/PTPRC/EBI3/TLR1/CD28/SPN/CD4/TYROBP/TLR4/LTB/CYBB/IL12B/CD86/CD3E/IL21/JAK2/TLR8/CD74/IL6	22
GO_POSITIVE_REGULATION_OF_LEUKOCYTE_MIGRATION	GO_POSITIVE_REGULATION_OF_LEUKOCYTE_MIGRATION	31/1098	130/18046	3.33655e-11	3.52993e-09	2.65275e-09	THBS4/CCL19/NCKAP1L/SELP/ELANE/CX3CR1/P2RY12/THY1/VEGFC/GPSM3/SWAP70/CCR7/AIF1/CXCL13/RAC2/C5AR1/SPN/DOCK8/CCL21/ITGA4/C3AR1/TREM2/CMKLR1/DYSF/CAMK1D/CCR1/CCL5/CD74/IL6/XCL2/TNFSF18	31
GO_POSITIVE_REGULATION_OF_LEUKOCYTE_DIFFERENTIATION	GO_POSITIVE_REGULATION_OF_LEUKOCYTE_DIFFERENTIATION	33/1098	148/18046	5.41407e-11	5.61331e-09	4.21842e-09	GLI3/AXL/CCL19/NCKAP1L/TESPA1/SASH3/RHOH/CD27/PTPRC/EVI2B/GLI2/GATA3/NOTCH2/CD4/TGFB1/TYROBP/TREM2/CD83/IL12B/CD86/DUSP10/CCR1/INPP5D/IL34/IL12RB1/RASGRP1/NLRP3/LILRB4/SLC9B2/SOCS1/IL5/CD74/EGR3	33
GO_CYTOKINE_SECRETION	GO_CYTOKINE_SECRETION	45/1098	252/18046	5.98663e-11	6.08524e-09	4.57307e-09	SSC5D/SYT11/TLR10/CLECL1/TLR6/FCGR2B/CCL19/TLR9/CD200/TLR1/ABCA1/BANK1/CLEC9A/CCR7/F2R/AIF1/GATA3/P2RX7/NOTCH2/AGTR2/TLR4/SRGN/CD200R1/FN1/TRIM6/DYSF/NLRC4/CRLF2/LILRB1/CD14/HAVCR2/POSTN/CD2/HDAC9/HTR2B/AGT/CRTAM/CD274/RASGRP1/NLRP3/TWIST1/TLR8/SOCS1/AIM2/GBP5	45
GO_LYMPHOCYTE_ACTIVATION_INVOLVED_IN_IMMUNE_RESPONSE	GO_LYMPHOCYTE_ACTIVATION_INVOLVED_IN_IMMUNE_RESPONSE	37/1098	182/18046	6.619e-11	6.59864e-09	4.95889e-09	GAPT/CD1C/CD19/FCGR2B/CCL19/PLCG2/FGL2/LGALS1/CORO1A/GPR183/CD180/PTPRC/LCP1/DOCK10/SWAP70/CD28/GATA3/DOCK11/SLAMF6/NOTCH2/SPN/CD40LG/ITGAL/TGFB1/TLR4/JAK3/LILRB1/IL12B/CD86/HAVCR2/EOMES/HLA-DMB/AICDA/IL12RB1/NLRP3/IL6/TNFSF18	37
GO_HOMOPHILIC_CELL_ADHESION_VIA_PLASMA_MEMBRANE_ADHESION_MOLECULES	GO_HOMOPHILIC_CELL_ADHESION_VIA_PLASMA_MEMBRANE_ADHESION_MOLECULES	35/1098	167/18046	8.93854e-11	8.7429e-09	6.57031e-09	PCDHGA12/FAT4/HMCN1/PCDH10/PCDHGB7/CDH11/IGSF21/PCDHGA2/PCDHGB6/ROBO1/PECAM1/PCDHB18P/PCDHGA5/PCDHB7/PCDHB4/CD84/PCDHGA9/PCDH18/PCDHGA11/PCDHGA3/PCDHGA7/PCDH7/CDH5/PCDH17/PCDHGA6/PCDH19/PCDHGA4/PCDHA10/PCDH11X/PCDHGB2/PCDHGC4/PCDHGB3/PCDHGB4/TENM3/PCDHA13	35
GO_MUSCLE_CONTRACTION	GO_MUSCLE_CONTRACTION	56/1098	362/18046	9.90764e-11	9.51134e-09	7.1478e-09	SGCD/MYLK/HTR2A/CALD1/FLNA/PPP1R12B/SLC8A1/CNN1/KCNMA1/HSPB6/ATP2B4/ACTG2/PRKG1/VIM/MYH11/SYNM/CHRNA3/TACR2/ITGA1/PIK3CG/SSPN/MYBPC2/TACR1/CLIC2/CTNNA3/EDNRA/CACNA2D1/TLN1/KCNA1/GJC1/SLMAP/EHD3/SPX/GJA5/NOS1/MYBPH/VCL/NKX2-5/PDE5A/F2R/CXCR4/STAC/PDE4B/CHRNB4/SMPX/DYSF/SULF1/GJA1/CALCRL/HTR2B/ADORA1/AGT/KCND3/TIFAB/CD38/UTS2	56
GO_GLYCOSAMINOGLYCAN_BINDING	GO_GLYCOSAMINOGLYCAN_BINDING	42/1098	232/18046	1.67329e-10	1.57715e-08	1.18523e-08	CCDC80/DPYSL3/FSTL1/FGF7/ECM2/THBS4/FGF1/PCOLCE/FBN1/NRP2/SELP/ELANE/PRNP/PTPRC/SELL/SOD3/LTBP2/BGN/EPYC/CXCL13/ENG/COL5A1/NRP1/VCAN/GPNMB/SPOCK2/CD44/FN1/TREM2/LXN/SERPINE2/SULF1/POSTN/THBS2/APOE/PLA2G2D/NLRP3/TNFAIP6/NELL1/REG1B/NDNF/MMP7	42
GO_REGULATION_OF_LYMPHOCYTE_DIFFERENTIATION	GO_REGULATION_OF_LYMPHOCYTE_DIFFERENTIATION	35/1098	171/18046	1.78037e-10	1.64811e-08	1.23856e-08	GLI3/DTX1/ZEB1/AXL/FCRL3/CCL19/NCKAP1L/FGL2/TESPA1/SASH3/TLR9/RHOH/CD27/PTPRC/CR1/CD28/GLI2/GATA3/IKZF3/JAK3/CD83/IL12B/CD86/DUSP10/CD2/INPP5D/NFAM1/IL12RB1/HLA-DOA/RASGRP1/NLRP3/LILRB4/SOCS1/CD74/EGR3	35
GO_B_CELL_RECEPTOR_SIGNALING_PATHWAY	GO_B_CELL_RECEPTOR_SIGNALING_PATHWAY	29/1098	125/18046	2.89951e-10	2.63703e-08	1.98173e-08	CD79B/MEF2C/RFTN1/CD22/PRKCB/BCL2/STAP1/CD19/MS4A1/FCGR2B/LPXN/FCRL3/CD79A/PLCG2/NCKAP1L/LAT2/PIK3CD/PTPRC/PAX5/CMTM3/IGHV1OR15-1/TRBC2/NFAM1/MNDA/LCK/IGHG4/CD38/IGHV1-69-2/IGHV3-20	29
GO_MUSCLE_SYSTEM_PROCESS	GO_MUSCLE_SYSTEM_PROCESS	65/1098	470/18046	4.13706e-10	3.63884e-08	2.7346e-08	SGCD/MEF2C/MYLK/IGF1/HTR2A/CALD1/FLNA/PPP1R12B/SLC8A1/CNN1/KCNMA1/HSPB6/ATP2B4/ACTG2/PRKG1/VIM/MYH11/AKAP6/SYNM/RGS4/CHRNA3/TACR2/ITGA1/PIK3CG/SSPN/MYBPC2/TACR1/CLIC2/FBXO32/CTNNA3/EDNRA/CACNA2D1/TLN1/KCNA1/GJC1/SLMAP/EHD3/SPX/GJA5/NOS1/MYBPH/VCL/NKX2-5/PDE5A/F2R/AIF1/AGTR2/CXCR4/STAC/PDE4B/CHRNB4/SMPX/DYSF/HAMP/SULF1/GJA1/CALCRL/HTR2B/ADORA1/AGT/KCND3/TIFAB/TIAM1/CD38/UTS2	65
GO_NEUTROPHIL_MIGRATION	GO_NEUTROPHIL_MIGRATION	28/1098	119/18046	4.14142e-10	3.63884e-08	2.7346e-08	THBS4/ITGA1/PIK3CG/CCL19/NCKAP1L/VAV1/PIK3CD/PECAM1/CCR7/CXCL13/RAC2/C5AR1/CCL2/CCL21/PDE4B/C3AR1/ITGB2/DYSF/CAMK1D/CCL13/TGFB2/BST1/CCL26/CCL22/CCL5/CCL17/CD74/XCL2	28
GO_REGULATION_OF_LEUKOCYTE_CHEMOTAXIS	GO_REGULATION_OF_LEUKOCYTE_CHEMOTAXIS	27/1098	114/18046	7.25152e-10	6.26531e-08	4.7084e-08	STAP1/THBS4/CCL19/NCKAP1L/GREM1/GPR18/VEGFC/GPSM3/SWAP70/CCR7/AIF1/CXCL13/RAC2/C5AR1/CCL2/CCL21/C3AR1/CMKLR1/DYSF/CAMK1D/BST1/CCR1/CCL5/CD74/IL6/CYP19A1/XCL2	27
GO_POSITIVE_REGULATION_OF_B_CELL_PROLIFERATION	GO_POSITIVE_REGULATION_OF_B_CELL_PROLIFERATION	16/1098	41/18046	7.6907e-10	6.53583e-08	4.9117e-08	MEF2C/BCL2/TNFRSF13C/FCRL3/NCKAP1L/SASH3/TLR9/GPR183/PTPRC/TNFSF13B/TLR4/BST1/IL21/IL5/CD38/CD74	16
GO_REGULATION_OF_LEUKOCYTE_MEDIATED_IMMUNITY	GO_REGULATION_OF_LEUKOCYTE_MEDIATED_IMMUNITY	37/1098	198/18046	8.16677e-10	6.82848e-08	5.13162e-08	CD1C/WAS/FCGR2B/SASH3/SCIMP/FCER2/VAV1/PTPRC/CD1E/CR1/CD28/RAC2/GATA3/P2RX7/SLAMF6/LTA/CD84/TGFB1/SH2D1A/TLR4/JAK3/NCR3/ITGB2/C3/LILRB1/IL12B/HAVCR2/CD96/IL12RB1/IL21/CRTAM/RASGRP1/NLRP3/CLNK/ITGAM/IL6/CLC	37
GO_REGULATION_OF_ANTIGEN_RECEPTOR_MEDIATED_SIGNALING_PATHWAY	GO_REGULATION_OF_ANTIGEN_RECEPTOR_MEDIATED_SIGNALING_PATHWAY	20/1098	65/18046	8.36067e-10	6.87964e-08	5.17007e-08	CD22/PRKCB/STAP1/CD19/FCGR2B/LPXN/FCRL3/TESPA1/THY1/PVRIG/PRNP/PTPRC/CCR7/PAX5/CMTM3/TRAT1/UBASH3A/NFAM1/LCK/LILRB4	20
GO_T_CELL_SELECTION	GO_T_CELL_SELECTION	17/1098	47/18046	9.14196e-10	7.40499e-08	5.56487e-08	GLI3/BCL2/PTPRC/CD28/CCR7/GATA3/SLAMF6/SPN/CD4/CD3G/IL12B/CD3D/THEMIS/CD3E/IL12RB1/CD74/IL6	17
GO_PHAGOCYTOSIS	GO_PHAGOCYTOSIS	54/1098	364/18046	1.02862e-09	8.20365e-08	6.16506e-08	PLD4/SYT11/WIPF1/STAP1/AXL/WAS/FCGR2B/ARHGAP25/PLCG2/NCKAP1L/ELMO1/CORO1A/ELANE/RAB31/VAV1/C4A/MYO1G/PTPRC/C4B/ABCA1/ITGB3/PECAM1/MSR1/BIN2/AIF1/RAC2/P2RX7/CCL2/ITGAL/IGHV1OR15-1/TYROBP/TLR4/TREM2/ITGB2/DYSF/CAMK1D/CD93/C3/TRBC2/CD3G/CD14/FCGR2A/ADORA1/FCGR3A/IGHG4/CEBPE/ITGAM/FCGR1A/IGKV2D-30/IGKV2-29/IGHV1-69-2/IGHV3-20/IGKV4-1/MEGF10	54
GO_B_CELL_DIFFERENTIATION	GO_B_CELL_DIFFERENTIATION	29/1098	132/18046	1.14203e-09	8.97011e-08	6.74106e-08	CD79B/POU2F2/LYL1/BCL2/CD19/MS4A1/FCGR2B/FCRL3/CD79A/PLCG2/NCKAP1L/LGALS1/TLR9/GPR183/CD27/PTPRC/VCAM1/DOCK10/CR2/DOCK11/NOTCH2/IKZF3/CD40LG/ITGA4/JAK3/HDAC9/AICDA/INPP5D/NFAM1	29
GO_GRANULOCYTE_MIGRATION	GO_GRANULOCYTE_MIGRATION	30/1098	142/18046	1.60173e-09	1.23931e-07	9.31345e-08	THBS4/ITGA1/PIK3CG/CCL19/NCKAP1L/VAV1/PIK3CD/PECAM1/CCR7/CXCL13/RAC2/C5AR1/CCL2/CCL21/PDE4B/C3AR1/CMKLR1/ITGB2/DYSF/CAMK1D/CCL13/TGFB2/BST1/CCL26/CCL22/CCL5/SCG2/CCL17/CD74/XCL2	30
GO_REGULATION_OF_B_CELL_ACTIVATION	GO_REGULATION_OF_B_CELL_ACTIVATION	35/1098	185/18046	1.65752e-09	1.26361e-07	9.49608e-08	MEF2C/CD22/BCL2/TNFRSF13C/CD19/FCGR2B/FCRL3/NCKAP1L/SASH3/TLR9/GPR183/CD27/PTPRC/BANK1/CD28/IKZF3/TNFSF13B/IGHV1OR15-1/TGFB1/TYROBP/TLR4/TRBC2/BST1/SAMSN1/INPP5D/NFAM1/MNDA/IL21/IGHG4/IL5/CD38/CD74/IL6/IGHV1-69-2/IGHV3-20	35
GO_SECRETORY_GRANULE_MEMBRANE	GO_SECRETORY_GRANULE_MEMBRANE	47/1098	298/18046	1.68515e-09	1.26606e-07	9.51447e-08	DOK3/LRMP/HVCN1/ATP8B4/NCKAP1L/SELP/RAB31/SYT4/PTPRC/GLIPR1/CD53/SELL/LAIR1/ITGB3/LHFPL2/CR1/PECAM1/SPARC/C5AR1/MOXD1/SLC2A5/ITGAL/C3AR1/CLEC4C/TYROBP/CHRNB4/CD44/PCDH7/ITGB2/SIGLEC5/CYBB/CD93/CD14/FCGR2A/SIGLEC9/BST1/FRMPD3/NFAM1/CD109/FPR1/OLR1/CD38/ITGAM/SIGLEC14/CAV2/ANPEP/ADGRE3	47
GO_POSITIVE_REGULATION_OF_IMMUNE_EFFECTOR_PROCESS	GO_POSITIVE_REGULATION_OF_IMMUNE_EFFECTOR_PROCESS	38/1098	213/18046	1.90159e-09	1.40826e-07	1.05831e-07	CD1C/CCL19/SASH3/SCIMP/FCER2/TLR9/VAV1/PTPRC/CD1E/CD28/RAC2/GATA3/P2RX7/SLAMF6/LTA/CD84/TGFB1/SH2D1A/TLR4/TRIM6/NCR3/ITGB2/C3/LILRB1/IL12B/CD86/SEMA7A/HLA-DMB/IL12RB1/IL21/CRTAM/RASGRP1/NLRP3/IL5/CD74/CLNK/ITGAM/IL6	38
GO_LEUKOCYTE_ACTIVATION_INVOLVED_IN_INFLAMMATORY_RESPONSE	GO_LEUKOCYTE_ACTIVATION_INVOLVED_IN_INFLAMMATORY_RESPONSE	17/1098	49/18046	1.93006e-09	1.40922e-07	1.05903e-07	SYT11/STAP1/TLR6/TLR7/PTPRC/AIF1/C5AR1/TYROBP/MAPT/TREM2/ITGB2/C1QA/JAK2/TLR8/ITGAM/IL6/CST7	17
GO_RESPONSE_TO_CHEMOKINE	GO_RESPONSE_TO_CHEMOKINE	24/1098	96/18046	1.9783e-09	1.41279e-07	1.06172e-07	CCL19/CX3CR1/ROBO1/CCR7/CXCL13/LOX/CXCR4/CCL2/DOCK8/CCL21/CCR4/TREM2/CCR5/CMKLR1/CCL13/CCR1/CXCR5/CCL26/CCL22/CCL5/CXCR3/CCL17/CCR9/XCL2	24
GO_INTEGRIN_BINDING	GO_INTEGRIN_BINDING	29/1098	135/18046	1.98946e-09	1.41279e-07	1.06172e-07	IGF1/ECM2/THBS4/FGF1/FBN1/TIMP2/FCER2/THY1/SFRP2/TNN/TLN1/COL3A1/ACTN1/LCP1/S1PR3/ITGBL1/VCAM1/ITGB3/CD40LG/COL5A1/GPNMB/FAP/FN1/ITGB2/FERMT3/SEMA7A/TGFBI/SPP1/EGFL6	29
GO_COLLAGEN_BINDING	GO_COLLAGEN_BINDING	20/1098	69/18046	2.7012e-09	1.8923e-07	1.42207e-07	COL14A1/ECM2/ASPN/LUM/ITGA1/PCOLCE/MRC2/AEBP1/CTSK/SPOCK1/SPARC/ANTXR1/LOX/SPOCK2/CD44/FN1/CTSL/TGFBI/ITGA11/LRRC15	20
GO_LYMPHOCYTE_MIGRATION	GO_LYMPHOCYTE_MIGRATION	26/1098	113/18046	2.89921e-09	2.00394e-07	1.50596e-07	MSN/PIK3CG/CCL19/GPR183/MYO1G/PIK3CD/CD200/CCR7/AIF1/CXCL13/GATA3/SPN/CCL2/DOCK8/CCL21/ITGA4/CYP7B1/ITGAL/CD200R1/CCL13/CCL26/CCL22/CCL5/CXCR3/CCL17/XCL2	26
GO_OSSIFICATION	GO_OSSIFICATION	56/1098	396/18046	3.03771e-09	2.07204e-07	1.55714e-07	MGP/MEF2C/GLI3/IGF1/RASSF2/SLC8A1/ASPN/BCL2/FAT4/WWTR1/OMD/TNC/GREM1/PENK/CDH11/MRC2/SFRP2/TNN/TAC1/NPPC/CLEC11A/CTSK/TMEM119/SH3PXD2B/DHH/BMP3/MMP2/SPARC/GLI2/P2RX7/LOX/MMP16/COL1A2/CHRDL2/VCAN/GPNMB/SIX2/TGFB1/SRGN/COL1A1/FZD1/MN1/TGFB2/PHOSPHO1/COL5A2/SEMA7A/CCR1/GDF5/ITGA11/TWIST1/CTHRC1/SPP1/NELL1/IL6/FOXC2/PHEX	56
GO_POSITIVE_REGULATION_OF_INTERFERON_GAMMA_PRODUCTION	GO_POSITIVE_REGULATION_OF_INTERFERON_GAMMA_PRODUCTION	19/1098	63/18046	3.22037e-09	2.1681e-07	1.62933e-07	SASH3/TLR7/TLR9/EBI3/SLAMF6/LTA/PDE4B/TLR4/IL12B/CD14/HAVCR2/CD2/CD3E/IL12RB1/IL21/HLA-DPB1/RASGRP1/TLR8/HLA-DPA1	19
GO_REGULATION_OF_LYMPHOCYTE_MEDIATED_IMMUNITY	GO_REGULATION_OF_LYMPHOCYTE_MEDIATED_IMMUNITY	30/1098	147/18046	3.80288e-09	2.52745e-07	1.89938e-07	CD1C/WAS/FCGR2B/SASH3/FCER2/VAV1/PTPRC/CD1E/CR1/CD28/GATA3/P2RX7/SLAMF6/LTA/TGFB1/SH2D1A/NCR3/C3/LILRB1/IL12B/HAVCR2/CD96/IL12RB1/IL21/CRTAM/RASGRP1/NLRP3/CLNK/IL6/CLC	30
GO_CELLULAR_EXTRAVASATION	GO_CELLULAR_EXTRAVASATION	19/1098	64/18046	4.321e-09	2.83545e-07	2.13085e-07	ITGA1/PIK3CG/SELP/ELANE/CX3CR1/THY1/PIK3CD/SELL/VCAM1/PECAM1/SPN/CCL2/CCL21/ITGA4/ADD2/ITGAL/ITGB2/SELPLG/BST1	19
GO_NEGATIVE_REGULATION_OF_CYTOKINE_PRODUCTION	GO_NEGATIVE_REGULATION_OF_CYTOKINE_PRODUCTION	47/1098	307/18046	4.51268e-09	2.89945e-07	2.17895e-07	IGF1/SSC5D/SYT11/AXL/TLR6/FCGR2B/NCKAP1L/LILRA4/ELANE/GPR18/TLR9/CX3CR1/PRNP/PTPRC/CD200/ABCD2/NLRC3/BANK1/GATA3/CD84/GPNMB/TGFB1/TYROBP/TLR4/JAK3/SRGN/CD200R1/FN1/TREM2/CMKLR1/CD83/PDCD1LG2/LILRB1/BPI/IL12B/HAVCR2/TGFB2/HDAC9/TIGIT/INPP5D/CD96/CD274/NLRP3/TWIST1/TLR8/IL6/IDO1	47
GO_T_CELL_RECEPTOR_SIGNALING_PATHWAY	GO_T_CELL_RECEPTOR_SIGNALING_PATHWAY	36/1098	201/18046	4.53463e-09	2.89945e-07	2.17895e-07	RFTN1/WAS/PLCG2/TESPA1/THY1/PVRIG/PRNP/PIK3CD/PTPRC/CD28/CCR7/GATA3/TRAC/CD4/PDE4B/TRAT1/THEMIS2/CD3G/TRAV8-4/HLA-DQA2/TRAV29DV5/CD3D/UBASH3A/HLA-DQB2/TRBV7-9/THEMIS/INPP5D/CD3E/LCK/HLA-DPB1/HLA-DRA/LILRB4/TRBV12-3/TRAV19/HLA-DPA1/HLA-DQA1	36
GO_CELL_SUBSTRATE_ADHESION	GO_CELL_SUBSTRATE_ADHESION	51/1098	348/18046	4.58633e-09	2.89945e-07	2.17895e-07	CCDC80/FLNA/ECM2/PARVA/BCL2/AXL/ITGA1/LGALS1/CORO1A/EPHA3/GREM1/COL8A1/THY1/TNN/COL3A1/PLEKHA2/MYO1G/FBLN2/ACTN1/ITGBL1/VCAM1/VCL/SPOCK1/ITGB3/PECAM1/CCR7/RAC2/ANTXR1/CCL21/NRP1/ITGA4/MYADM/ITGAL/SPOCK2/CD44/FN1/COL1A1/ITGB2/OTOA/POSTN/BST1/FERMT3/FREM1/CASS4/CD3E/CD96/JAK2/ITGA11/TIAM1/EGFL6/NDNF	51
GO_REGULATION_OF_T_CELL_DIFFERENTIATION	GO_REGULATION_OF_T_CELL_DIFFERENTIATION	29/1098	140/18046	4.82233e-09	3.01192e-07	2.26347e-07	GLI3/DTX1/ZEB1/CCL19/NCKAP1L/FGL2/TESPA1/SASH3/RHOH/CD27/PTPRC/CR1/CD28/GLI2/GATA3/JAK3/CD83/IL12B/CD86/DUSP10/CD2/IL12RB1/HLA-DOA/RASGRP1/NLRP3/LILRB4/SOCS1/CD74/EGR3	29
GO_CYTOKINE_METABOLIC_PROCESS	GO_CYTOKINE_METABOLIC_PROCESS	27/1098	124/18046	5.22644e-09	3.22546e-07	2.42394e-07	TLR6/ELANE/TLR7/TLR9/CX3CR1/PTPRC/EBI3/TLR1/CD28/GATA3/SPN/CD4/TYROBP/TLR4/LTB/CYBB/LILRB1/IL12B/CD86/INPP5D/CD3E/IL21/JAK2/TLR8/CEBPE/CD74/IL6	27
GO_MEMBRANE_REGION	GO_MEMBRANE_REGION	49/1098	330/18046	5.95345e-09	3.6309e-07	2.72863e-07	HTR2A/TUBA1A/RFTN1/KCNMA1/ATP2B4/PTGIS/AKAP6/CD19/CHRNA3/TLR6/MS4A1/ITGA1/CD79A/LAT2/P2RY12/THY1/EHD2/PRNP/PTPRC/TNR/CD48/NOS1/TLR1/ABCA1/CNTN1/PECAM1/F2R/ADD2/CD4/MYADM/MAPT/ITGB2/DYSF/KCNA3/FAS/SULF1/GJA1/RGS19/SELPLG/CD14/CD2/INPP5D/LCK/KCND2/JAK2/OLR1/ITGAM/CAV2/MLC1	49
GO_POSITIVE_REGULATION_OF_LYMPHOCYTE_DIFFERENTIATION	GO_POSITIVE_REGULATION_OF_LYMPHOCYTE_DIFFERENTIATION	23/1098	95/18046	8.33562e-09	5.02464e-07	3.77603e-07	GLI3/AXL/CCL19/NCKAP1L/TESPA1/SASH3/RHOH/CD27/PTPRC/GLI2/GATA3/CD83/IL12B/CD86/DUSP10/INPP5D/IL12RB1/RASGRP1/NLRP3/LILRB4/SOCS1/CD74/EGR3	23
GO_POSITIVE_REGULATION_OF_HEMOPOIESIS	GO_POSITIVE_REGULATION_OF_HEMOPOIESIS	34/1098	188/18046	9.39646e-09	5.599e-07	4.20766e-07	GLI3/AXL/CCL19/NCKAP1L/TESPA1/SASH3/RHOH/CD27/PTPRC/EVI2B/ETS1/GLI2/GATA3/NOTCH2/CD4/TGFB1/TYROBP/TREM2/CD83/IL12B/CD86/DUSP10/CCR1/INPP5D/IL34/IL12RB1/RASGRP1/NLRP3/LILRB4/SLC9B2/SOCS1/IL5/CD74/EGR3	34
GO_T_CELL_MIGRATION	GO_T_CELL_MIGRATION	19/1098	67/18046	1.00502e-08	5.92049e-07	4.44926e-07	MSN/PIK3CG/GPR183/MYO1G/PIK3CD/CD200/AIF1/CXCL13/SPN/CCL2/DOCK8/CCL21/ITGA4/ITGAL/CD200R1/CCL26/CCL5/CXCR3/XCL2	19
GO_SECOND_MESSENGER_MEDIATED_SIGNALING	GO_SECOND_MESSENGER_MEDIATED_SIGNALING	59/1098	443/18046	1.11315e-08	6.4838e-07	4.87259e-07	SGCD/IGF1/SLC8A1/CD22/GNG2/ATP2B4/PRKG1/AKAP6/PLCG2/CLIC2/SELP/LAT2/CX3CR1/PDE3A/P2RY12/PRNP/PTPRC/NPPC/GPR65/NOS1/VCAM1/ABCA1/PDE5A/CCR7/P2RX7/GRIN2A/AGTR2/CXCR4/RAMP2/CCR4/NFATC1/CD4/MAPT/TRAT1/AQP1/RASD2/TREM2/CCR5/CMKLR1/PLEK/DRD5/CALCRL/APLNR/BST1/CCR1/HTR2B/CD3E/APOE/CXCR5/UCN3/AGT/FPR1/CXCR3/KCNC2/CCR9/GIP/NDNF/ADGRE3/GCG	59
GO_ENDOPLASMIC_RETICULUM_LUMEN	GO_ENDOPLASMIC_RETICULUM_LUMEN	46/1098	306/18046	1.17796e-08	6.76447e-07	5.08352e-07	BCHE/COL14A1/FSTL1/LTBP1/IGFBP7/TNC/LGALS1/SPON1/FBN1/COL8A1/PENK/ARSB/FMO1/COL3A1/C4A/EBI3/IGFBP4/FKBP7/COL15A1/COL6A3/TIMP1/GPX8/COL5A1/COL1A2/P4HA3/CD4/VCAN/MXRA8/FN1/GPX7/COL1A1/COL4A2/C3/CERCAM/IL12B/RCN3/COL5A2/APOE/COL12A1/SCG2/SPP1/IL6/GIP/ARSI/COL10A1/GCG	46
GO_PLATELET_ACTIVATION	GO_PLATELET_ACTIVATION	30/1098	154/18046	1.18744e-08	6.76447e-07	5.08352e-07	FLNA/PRKCB/GNG2/PRKG1/AXL/PIK3CG/PLCG2/SELP/P2RY12/VAV1/TLN1/COL3A1/DGKI/DGKG/VCL/ITGB3/F2R/TREML1/CD40LG/COL1A2/TLR4/SERPINE2/COL1A1/PLEK/GP1BA/FERMT3/APOE/LCK/IL6/GNA14	30
GO_PRODUCTION_OF_MOLECULAR_MEDIATOR_OF_IMMUNE_RESPONSE	GO_PRODUCTION_OF_MOLECULAR_MEDIATOR_OF_IMMUNE_RESPONSE	45/1098	298/18046	1.47543e-08	8.31373e-07	6.24779e-07	GAPT/VPREB3/POU2F2/IL31RA/CD22/FCGR2B/FCRL3/FGL2/SASH3/ELANE/SCIMP/TLR9/PTPRC/SWAP70/CD28/GATA3/CD40LG/TNFSF13B/TGFB1/TRAV9-2/TLR4/JAK3/TRIM6/TRAV2/LILRB1/IL12B/TGFB2/TRAV14DV4/SEMA7A/AICDA/TRIL/LAX1/CD96/IGKV1-6/NLRP3/IL5/CD74/TRAV19/CLNK/TRAV38-1/IGKV2D-30/IL6/IGKV2-29/IGKV4-1/CLC	45
GO_NEUROINFLAMMATORY_RESPONSE	GO_NEUROINFLAMMATORY_RESPONSE	20/1098	76/18046	1.69294e-08	9.4368e-07	7.09178e-07	IGF1/SYT11/STAP1/TLR6/TLR7/PTPRC/CD200/AIF1/C5AR1/TYROBP/MAPT/CD200R1/TREM2/ITGB2/C1QA/JAK2/TLR8/ITGAM/IL6/CST7	20
GO_CELL_ADHESION_MEDIATED_BY_INTEGRIN	GO_CELL_ADHESION_MEDIATED_BY_INTEGRIN	19/1098	69/18046	1.71326e-08	9.44845e-07	7.10054e-07	LPXN/PIK3CG/NCKAP1L/FBN1/P2RY12/SFRP2/ITGBL1/ITGB3/SWAP70/CXCL13/CCL21/ITGA4/ITGB2/TGFB2/FERMT3/CD3E/ITGA11/CCL5/FOXC2	19
GO_PLATELET_ALPHA_GRANULE	GO_PLATELET_ALPHA_GRANULE	22/1098	91/18046	1.80335e-08	9.84059e-07	7.39523e-07	IGF1/A2M/SELP/VEGFC/ACTN1/ISLR/ITGB3/LHFPL2/PECAM1/SPARC/TREML1/TIMP1/TGFB1/SRGN/FN1/SERPINE2/PCDH7/LEFTY2/TGFB2/FERMT3/THBS2/CD109	22
GO_LEUKOCYTE_APOPTOTIC_PROCESS	GO_LEUKOCYTE_APOPTOTIC_PROCESS	24/1098	107/18046	1.99287e-08	1.07615e-06	8.08728e-07	MEF2C/GLI3/AXL/CCL19/CD27/PIK3CD/CCR7/P2RX7/DOCK8/CCL21/JAK3/CCR5/CD3G/LILRB1/CTSL/PTCRA/CD274/CCL5/PDCD1/CD74/IL6/BIRC7/CLC/IDO1	24
GO_POSITIVE_REGULATION_OF_PEPTIDYL_TYROSINE_PHOSPHORYLATION	GO_POSITIVE_REGULATION_OF_PEPTIDYL_TYROSINE_PHOSPHORYLATION	34/1098	194/18046	2.13147e-08	1.13913e-06	8.56059e-07	IGF1/IL31RA/HTR2A/FGF7/STAP1/THBS4/GREM1/PRNP/PTPRC/CNTN1/ITGB3/BANK1/PECAM1/RELN/NRP1/CD4/TGFB1/NCF1/CD44/TREM2/NOX4/IL12B/CASS4/CD3E/IL21/ADORA1/AGT/JAK2/CCL5/IL5/CD74/FCGR1A/IL6/TNFSF18	34
GO_NEGATIVE_REGULATION_OF_LYMPHOCYTE_ACTIVATION	GO_NEGATIVE_REGULATION_OF_LYMPHOCYTE_ACTIVATION	29/1098	151/18046	2.88845e-08	1.52793e-06	1.14824e-06	GLI3/DTX1/AXL/FCGR2B/FGL2/PRNP/TNFAIP8L2/BANK1/PDE5A/SPN/LST1/GPNMB/TYROBP/JAK3/PDCD1LG2/LILRB1/CD86/HAVCR2/SAMSN1/TIGIT/INPP5D/LAX1/PLA2G2D/MNDA/CD274/SOCS1/CD74/CLNK/IDO1	29
GO_REGULATION_OF_ADAPTIVE_IMMUNE_RESPONSE	GO_REGULATION_OF_ADAPTIVE_IMMUNE_RESPONSE	30/1098	160/18046	2.96446e-08	1.5523e-06	1.16656e-06	MEF2C/CD1C/WAS/FCGR2B/CCL19/SASH3/FCER2/PTPRC/CD1E/CD48/CR1/CD28/GATA3/P2RX7/LTA/CD4/TNFSF13B/TGFB1/JAK3/C3/LILRB1/IL12B/HAVCR2/DUSP10/SAMSN1/IL12RB1/CD274/NLRP3/IL6/CLC	30
GO_POSITIVE_REGULATION_OF_LEUKOCYTE_MEDIATED_CYTOTOXICITY	GO_POSITIVE_REGULATION_OF_LEUKOCYTE_MEDIATED_CYTOTOXICITY	16/1098	51/18046	3.00225e-08	1.55637e-06	1.16962e-06	CD1C/STAP1/VAV1/PTPRC/CD1E/P2RX7/SLAMF6/TYROBP/SH2D1A/NCR3/IL12B/IL12RB1/IL21/CRTAM/RASGRP1/ITGAM	16
GO_TISSUE_REMODELING	GO_TISSUE_REMODELING	32/1098	180/18046	3.88867e-08	1.96427e-06	1.47615e-06	MEF2C/RASSF2/AXL/THBS4/GREM1/GJA5/CTSK/TMEM119/BGN/ITGB3/MMP2/F2R/RAC2/P2RX7/NOTCH2/AGTR2/TIMP1/GPNMB/TGFB1/NOX4/GJA1/IL12B/SEMA3C/INPP5D/IL21/AGT/GDF5/CTHRC1/SPP1/CD38/IL6/FOXC2	32
GO_COLLAGEN_TRIMER	GO_COLLAGEN_TRIMER	21/1098	87/18046	3.90278e-08	1.96427e-06	1.47615e-06	COL14A1/COL6A6/LUM/COL8A1/COL3A1/COL15A1/COL6A3/MSR1/LOX/COL5A1/COL1A2/C1QTNF5/COL1A1/COL4A2/COL5A2/C1QA/C1QC/C1QB/COL12A1/CTHRC1/COL10A1	21
GO_POSITIVE_REGULATION_OF_LEUKOCYTE_CHEMOTAXIS	GO_POSITIVE_REGULATION_OF_LEUKOCYTE_CHEMOTAXIS	21/1098	87/18046	3.90278e-08	1.96427e-06	1.47615e-06	THBS4/CCL19/NCKAP1L/VEGFC/GPSM3/SWAP70/CCR7/AIF1/CXCL13/RAC2/C5AR1/CCL21/C3AR1/CMKLR1/DYSF/CAMK1D/CCR1/CCL5/CD74/IL6/XCL2	21
GO_POSITIVE_REGULATION_OF_LYMPHOCYTE_MEDIATED_IMMUNITY	GO_POSITIVE_REGULATION_OF_LYMPHOCYTE_MEDIATED_IMMUNITY	23/1098	103/18046	4.28105e-08	2.13394e-06	1.60366e-06	CD1C/SASH3/FCER2/VAV1/PTPRC/CD1E/CD28/GATA3/P2RX7/SLAMF6/LTA/TGFB1/SH2D1A/NCR3/C3/IL12B/IL12RB1/IL21/CRTAM/RASGRP1/NLRP3/CLNK/IL6	23
GO_REGULATION_OF_PEPTIDYL_TYROSINE_PHOSPHORYLATION	GO_REGULATION_OF_PEPTIDYL_TYROSINE_PHOSPHORYLATION	40/1098	258/18046	4.45387e-08	2.19894e-06	1.65251e-06	IGF1/IL31RA/HTR2A/FGF7/STAP1/THBS4/GREM1/THY1/SFRP2/PRNP/PTPRC/CNTN1/ITGB3/BANK1/PECAM1/RELN/NRP1/CD4/TGFB1/NCF1/CD44/TREM2/ITGB2/NOX4/IL12B/BST1/SAMSN1/CASS4/CD3E/IL21/ADORA1/AGT/JAK2/CCL5/SOCS1/IL5/CD74/FCGR1A/IL6/TNFSF18	40
GO_HETEROPHILIC_CELL_CELL_ADHESION_VIA_PLASMA_MEMBRANE_CELL_ADHESION_MOLECULES	GO_HETEROPHILIC_CELL_CELL_ADHESION_VIA_PLASMA_MEMBRANE_CELL_ADHESION_MOLECULES	15/1098	46/18046	4.52149e-08	2.21126e-06	1.66177e-06	FAT4/HMCN1/SELP/IGSF21/VCAM1/TENM4/ITGAL/CD6/SCARF2/IL1RAPL1/CRB2/CD209/CRB1/TENM2/TENM3	15
GO_BONE_DEVELOPMENT	GO_BONE_DEVELOPMENT	36/1098	219/18046	4.59785e-08	2.21579e-06	1.66518e-06	MEF2C/GLI3/IGF1/COL14A1/RAB23/FAT4/PIP4K2A/FBN1/GREM1/SFRP2/PTPRC/NPPC/TMEM119/SFRP4/SH3PXD2B/BGN/COL6A3/EPYC/SPARC/NOTCH2/LOX/ENG/MMP16/TYROBP/COL1A1/SULF1/GJA1/LILRB1/PHOSPHO1/FREM1/COL12A1/TIFAB/TWIST1/SLC9B2/PHEX/MATN2	36
GO_GLIAL_CELL_ACTIVATION	GO_GLIAL_CELL_ACTIVATION	17/1098	59/18046	4.61624e-08	2.21579e-06	1.66518e-06	SYT11/STAP1/TLR6/TLR7/PTPRC/AIF1/C5AR1/TYROBP/MAPT/TREM2/ITGB2/C1QA/JAK2/TLR8/ITGAM/IL6/CST7	17
GO_REGULATION_OF_LEUKOCYTE_MEDIATED_CYTOTOXICITY	GO_REGULATION_OF_LEUKOCYTE_MEDIATED_CYTOTOXICITY	19/1098	73/18046	4.67252e-08	2.22223e-06	1.67001e-06	CD1C/STAP1/FCGR2B/VAV1/PTPRC/CD1E/P2RX7/SLAMF6/TYROBP/SH2D1A/NCR3/LILRB1/IL12B/HAVCR2/IL12RB1/IL21/CRTAM/RASGRP1/ITGAM	19
GO_HUMORAL_IMMUNE_RESPONSE	GO_HUMORAL_IMMUNE_RESPONSE	49/1098	352/18046	4.90107e-08	2.29263e-06	1.72292e-06	MEF2C/POU2F2/BCL2/CD19/A2M/MS4A1/FCGR2B/ELANE/FCER2/RNASE6/GPR183/C4A/PTPRC/C4B/EBI3/CR1/CD28/CR2/CCR7/CXCL13/PAX5/GATA3/LTA/NOTCH2/C5AR1/CCL2/C3AR1/IGHV1OR15-1/SH2D1A/TREM2/CD83/C3/TRBC2/CCL13/BPI/BST1/C1QA/C1QC/C1QB/IGHG4/PDCD1/IGKV2D-30/IL6/IGKV2-29/RNASE3/IGHV1-69-2/IGHV3-20/REG1B/IGKV4-1	49
GO_ALPHA_BETA_T_CELL_ACTIVATION	GO_ALPHA_BETA_T_CELL_ACTIVATION	27/1098	137/18046	4.90898e-08	2.29263e-06	1.72292e-06	GLI3/BCL2/CCL19/NCKAP1L/SASH3/GPR18/GPR183/PTPRC/EBI3/TNFSF8/CD28/GATA3/SLAMF6/SPN/JAK3/CD83/LILRB1/IL12B/CD86/EOMES/CD3E/PLA2G2D/IL12RB1/CD274/NLRP3/SOCS1/IL6	27
GO_CARBOHYDRATE_BINDING	GO_CARBOHYDRATE_BINDING	41/1098	270/18046	5.48764e-08	2.53888e-06	1.90798e-06	PRG4/CLEC17A/CD22/CLECL1/LGALS1/CD72/SELP/SIGLEC10/FCER2/MRC2/CLEC2B/KLRG1/C4B/SELL/CLEC11A/CNTN1/CLEC9A/CD207/ENG/SLC2A5/P4HA3/VCAN/CD248/CLEC4C/KLRB1/SIGLEC5/CD93/SIGLEC8/ATRNL1/SIGLEC7/SIGLEC9/FREM1/MRC1/CD209/HLA-DRA/OLR1/SIGLEC14/CHI3L2/REG1B/CLC/GALNT9	41
GO_CELLULAR_DEFENSE_RESPONSE	GO_CELLULAR_DEFENSE_RESPONSE	16/1098	53/18046	5.53421e-08	2.53888e-06	1.90798e-06	RAB23/FCMR/CX3CR1/KLRG1/LY96/C5AR1/CD300C/SPN/TYROBP/SH2D1A/TRAT1/NCF1/CCR5/MNDA/KIR3DL2/CCR9	16
GO_CALCIUM_MEDIATED_SIGNALING	GO_CALCIUM_MEDIATED_SIGNALING	36/1098	221/18046	5.83636e-08	2.65401e-06	1.99449e-06	SGCD/IGF1/SLC8A1/CD22/ATP2B4/AKAP6/PLCG2/CLIC2/SELP/LAT2/CX3CR1/P2RY12/PRNP/PTPRC/NOS1/VCAM1/CCR7/P2RX7/GRIN2A/CXCR4/CCR4/NFATC1/CD4/MAPT/TRAT1/TREM2/CCR5/CMKLR1/PLEK/BST1/CCR1/HTR2B/CD3E/CXCR5/CXCR3/CCR9	36
GO_TUMOR_NECROSIS_FACTOR_SUPERFAMILY_CYTOKINE_PRODUCTION	GO_TUMOR_NECROSIS_FACTOR_SUPERFAMILY_CYTOKINE_PRODUCTION	31/1098	174/18046	6.00568e-08	2.70726e-06	2.03451e-06	IGF1/SYT11/AXL/CCL19/SASH3/LILRA4/GPR18/TLR9/CX3CR1/PTPRC/TLR1/NLRC3/LY96/ZBTB20/SPN/GPNMB/TYROBP/TLR4/TREM2/CYBB/LILRB1/BPI/IL12B/CD86/CD14/HAVCR2/CD2/JAK2/CD274/RASGRP1/TWIST1	31
GO_CYTOKINE_RECEPTOR_ACTIVITY	GO_CYTOKINE_RECEPTOR_ACTIVITY	22/1098	97/18046	6.23281e-08	2.78542e-06	2.09325e-06	IL31RA/CX3CR1/EBI3/CCR7/CXCR4/CCR4/CD4/IL21R/CSF2RB/CD44/CCR5/CMKLR1/CRLF2/IL12B/CCR1/CXCR5/IL12RB1/IL9R/CXCR3/CSF2RA/CD74/CCR9	22
GO_NEGATIVE_REGULATION_OF_RESPONSE_TO_EXTERNAL_STIMULUS	GO_NEGATIVE_REGULATION_OF_RESPONSE_TO_EXTERNAL_STIMULUS	54/1098	410/18046	6.81167e-08	2.9984e-06	2.25331e-06	IGF1/SYT11/PTGIS/PRKG1/STAP1/CNR2/A2M/FCGR2B/FGL2/GREM1/ELANE/GPR18/SIGLEC10/PTPRC/CD200/TNR/SPX/ABCD2/NLRC3/ETS1/TNFAIP8L2/CR1/ROBO1/HTRA1/AIF1/CXCL13/GATA3/CCL2/IFI16/NRP1/FAP/CD200R1/SERPINE2/CDH5/GJA1/LILRB1/IL12B/SEMA6B/CALCRL/HAVCR2/DUSP10/GP1BA/SEMA3C/SEMA7A/APOE/CD96/ADORA1/CD109/NLRP3/TNFAIP6/SPP1/CST7/CYP19A1/SEMA3A	54
GO_REGULATION_OF_HEMOPOIESIS	GO_REGULATION_OF_HEMOPOIESIS	60/1098	477/18046	6.82506e-08	2.9984e-06	2.25331e-06	MEF2C/GLI3/RASSF2/DTX1/ZEB1/PRKCB/AXL/FCGR2B/FCRL3/CCL19/NCKAP1L/FGL2/TESPA1/SASH3/FBN1/TLR9/RHOH/CD27/PTPRC/LMO1/EVI2B/MAFB/ETS1/CR1/CD28/GLI2/GATA3/NOTCH2/LOX/IKZF3/SPI1/CD4/TGFB1/TYROBP/TLR4/JAK3/TREM2/CD83/LILRB1/IL12B/CD86/DUSP10/GP1BA/CD2/C1QC/CCR1/INPP5D/NFAM1/IL34/IL12RB1/HLA-DOA/RASGRP1/NLRP3/LILRB4/SLC9B2/SOCS1/IL5/MIXL1/CD74/EGR3	60
GO_POSITIVE_REGULATION_OF_LEUKOCYTE_MEDIATED_IMMUNITY	GO_POSITIVE_REGULATION_OF_LEUKOCYTE_MEDIATED_IMMUNITY	26/1098	131/18046	7.45898e-08	3.24936e-06	2.4419e-06	CD1C/SASH3/SCIMP/FCER2/VAV1/PTPRC/CD1E/CD28/GATA3/P2RX7/SLAMF6/LTA/TGFB1/SH2D1A/NCR3/ITGB2/C3/IL12B/IL12RB1/IL21/CRTAM/RASGRP1/NLRP3/CLNK/ITGAM/IL6	26
GO_REGULATION_OF_NEUTROPHIL_CHEMOTAXIS	GO_REGULATION_OF_NEUTROPHIL_CHEMOTAXIS	12/1098	30/18046	7.53649e-08	3.25576e-06	2.44672e-06	THBS4/CCL19/NCKAP1L/CCR7/RAC2/C5AR1/CCL21/C3AR1/DYSF/CAMK1D/BST1/CD74	12
GO_MHC_CLASS_II_PROTEIN_COMPLEX	GO_MHC_CLASS_II_PROTEIN_COMPLEX	9/1098	16/18046	8.5791e-08	3.67554e-06	2.76218e-06	HLA-DQA2/HLA-DMB/HLA-DQB2/HLA-DPB1/HLA-DRA/HLA-DOA/CD74/HLA-DPA1/HLA-DQA1	9
GO_SYNAPSE_ORGANIZATION	GO_SYNAPSE_ORGANIZATION	54/1098	414/18046	9.42475e-08	4.00474e-06	3.00958e-06	MEF2C/TUBA1A/FLRT2/MAP1B/ZNF804A/NRXN2/FCGR2B/TNC/NRP2/CX3CR1/GPC6/IGSF21/PRNP/ACTN1/TNR/SRPX2/DOCK10/SEZ6L/DRP2/ARHGAP22/NFIA/SYNDIG1/SPARC/F2R/PCDHB4/C5AR1/SLITRK4/RELN/NRP1/NTNG2/ADD2/MAPT/SPOCK2/LRRTM3/SRGN/TREM2/FZD1/C3/PCDH17/LRRC4C/IL1RAPL1/C1QA/MYH10/C1QC/THBS2/APOE/C1QB/NLGN4X/TIAM1/SYN1/ITGAM/PCDHGC4/SEZ6/SHANK1	54
GO_COLLAGEN_FIBRIL_ORGANIZATION	GO_COLLAGEN_FIBRIL_ORGANIZATION	16/1098	55/18046	9.88141e-08	4.13107e-06	3.10451e-06	COL14A1/LUM/GREM1/AEBP1/SFRP2/COL3A1/LOX/COL5A1/COL1A2/COL1A1/PXDN/TGFB2/COL5A2/COL12A1/ADAMTS2/FOXC2	16
GO_INTERLEUKIN_10_PRODUCTION	GO_INTERLEUKIN_10_PRODUCTION	16/1098	55/18046	9.88141e-08	4.13107e-06	3.10451e-06	FCGR2B/SASH3/TLR9/CD28/CD40LG/TYROBP/TLR4/JAK3/TREM2/CD83/PDCD1LG2/LILRB1/IL12B/TIGIT/CD274/IDO1	16
GO_MYELOID_LEUKOCYTE_DIFFERENTIATION	GO_MYELOID_LEUKOCYTE_DIFFERENTIATION	34/1098	208/18046	1.24297e-07	5.15486e-06	3.87389e-06	MEF2C/IL31RA/RASSF2/CCL19/FBN1/GPR183/PIK3CD/EVI2B/NRROS/MAFB/TSPAN2/CCR7/GATA3/NOTCH2/IFI16/SPI1/CD4/TGFB1/TYROBP/TLR4/TREM2/LILRB1/IL12B/C1QC/CCR1/INPP5D/IL34/CD109/LILRB4/SLC9B2/CEBPE/IL5/CD74/OSCAR	34
GO_PEPTIDE_RECEPTOR_ACTIVITY	GO_PEPTIDE_RECEPTOR_ACTIVITY	28/1098	152/18046	1.25626e-07	5.1686e-06	3.88421e-06	CYSLTR1/TACR2/TACR1/GRPR/CX3CR1/EDNRA/SORCS2/CCR7/F2R/MLNR/AGTR2/CXCR4/RAMP2/CCR4/CCR5/CMKLR1/FPR3/CALCRL/APLNR/GP1BA/CYSLTR2/CCR1/CXCR5/NPR3/FPR1/CXCR3/CCR9/NPBWR1	28
GO_REGULATION_OF_LEUKOCYTE_APOPTOTIC_PROCESS	GO_REGULATION_OF_LEUKOCYTE_APOPTOTIC_PROCESS	20/1098	85/18046	1.29091e-07	5.26934e-06	3.95992e-06	MEF2C/AXL/CCL19/CD27/PIK3CD/CCR7/P2RX7/DOCK8/CCL21/JAK3/CCR5/CD3G/LILRB1/PTCRA/CD274/CCL5/PDCD1/CD74/BIRC7/IDO1	20
GO_POSITIVE_REGULATION_OF_GRANULOCYTE_CHEMOTAXIS	GO_POSITIVE_REGULATION_OF_GRANULOCYTE_CHEMOTAXIS	11/1098	26/18046	1.33245e-07	5.39643e-06	4.05543e-06	THBS4/CCL19/NCKAP1L/CCR7/RAC2/C5AR1/CCL21/C3AR1/DYSF/CAMK1D/CD74	11
GO_REGULATION_OF_INFLAMMATORY_RESPONSE	GO_REGULATION_OF_INFLAMMATORY_RESPONSE	51/1098	387/18046	1.54703e-07	6.21689e-06	4.67201e-06	IGF1/SYT11/PTGIS/STAP1/TLR10/CNR2/TLR6/FCGR2B/PIK3CG/ELANE/SIGLEC10/TLR7/TLR9/TAC1/PTPRC/SUCNR1/CD200/GPSM3/ABCD2/NLRC3/ETS1/TNFAIP8L2/CD28/CCR7/GATA3/LTA/CD6/TLR4/CD200R1/TREM2/CDH5/C3/IL12B/BCL6B/CALCRL/DUSP10/BST1/SEMA7A/APOE/IL21/ADORA1/AGT/JAK2/CCL5/NLRP3/TNFAIP6/IL6/CST7/CYP19A1/GBP5/IDO1	51
GO_HEPARIN_BINDING	GO_HEPARIN_BINDING	30/1098	172/18046	1.58963e-07	6.33895e-06	4.76374e-06	CCDC80/FSTL1/FGF7/ECM2/THBS4/FGF1/PCOLCE/FBN1/NRP2/SELP/ELANE/PRNP/PTPRC/SELL/SOD3/LTBP2/CXCL13/COL5A1/NRP1/GPNMB/FN1/LXN/SERPINE2/POSTN/THBS2/APOE/PLA2G2D/NELL1/NDNF/MMP7	30
GO_INTERLEUKIN_1_BETA_PRODUCTION	GO_INTERLEUKIN_1_BETA_PRODUCTION	22/1098	102/18046	1.6127e-07	6.38186e-06	4.79599e-06	IGF1/TLR6/CCL19/CX3CR1/SUCNR1/S1PR3/ABCA1/CCR7/F2R/P2RX7/PYHIN1/IFI16/TYROBP/TLR4/TREM2/NLRC4/MNDA/JAK2/NLRP3/TLR8/AIM2/GBP5	22
GO_LYMPHOCYTE_COSTIMULATION	GO_LYMPHOCYTE_COSTIMULATION	16/1098	57/18046	1.71362e-07	6.69634e-06	5.03232e-06	TNFRSF13C/CCL19/LGALS1/VAV1/BTLA/CD28/CCR7/CCL21/CD40LG/TNFSF13B/PDCD1LG2/CD86/CD3E/LCK/CD274/PDCD1	16
GO_POSITIVE_REGULATION_OF_CELL_KILLING	GO_POSITIVE_REGULATION_OF_CELL_KILLING	17/1098	64/18046	1.718e-07	6.69634e-06	5.03232e-06	CD1C/STAP1/FCER2/VAV1/PTPRC/CD1E/P2RX7/SLAMF6/TYROBP/SH2D1A/NCR3/IL12B/IL12RB1/IL21/CRTAM/RASGRP1/ITGAM	17
GO_CHEMOKINE_BINDING	GO_CHEMOKINE_BINDING	12/1098	32/18046	1.75601e-07	6.79339e-06	5.10525e-06	A2M/CX3CR1/ITGB3/CCR7/CXCR4/CCR4/ITGA4/CCR5/CCR1/CXCR5/CXCR3/CCR9	12
GO_POSITIVE_REGULATION_OF_ERK1_AND_ERK2_CASCADE	GO_POSITIVE_REGULATION_OF_ERK1_AND_ERK2_CASCADE	34/1098	211/18046	1.76935e-07	6.79346e-06	5.1053e-06	HTR2A/CCL19/SCIMP/GPR183/PTPRC/CCR7/F2R/NOTCH2/C5AR1/CCL2/CCL21/NRP1/CD4/GPNMB/PDGFRB/TGFB1/TLR4/CD44/TREM2/NOX4/CCL13/HAVCR2/SEMA7A/CCR1/HTR2B/APOE/CCL26/CCL22/RASGRP1/CCL5/CCL17/CD74/XCL2/GCG	34
GO_REGULATION_OF_CELLULAR_RESPONSE_TO_GROWTH_FACTOR_STIMULUS	GO_REGULATION_OF_CELLULAR_RESPONSE_TO_GROWTH_FACTOR_STIMULUS	42/1098	292/18046	1.78224e-07	6.79346e-06	5.1053e-06	ZEB1/PRKCB/FSTL1/ASPN/LTBP1/FGF1/FBN1/GREM1/RNF165/ADGRA2/ZNF423/VEGFC/SFRP2/DOK5/CHST11/NRROS/LDLRAD4/SFRP4/ITGB3/ROBO1/HTRA1/CXCL13/GATA3/NOTCH2/LOX/AGTR2/DKK3/ENG/NREP/DAB2/HTRA3/TGFB1/CDH5/FZD1/SULF1/CRB2/DAND5/CD109/AGT/GDF5/CAV2/GDF3	42
GO_REGULATION_OF_GRANULOCYTE_CHEMOTAXIS	GO_REGULATION_OF_GRANULOCYTE_CHEMOTAXIS	14/1098	44/18046	1.80281e-07	6.80918e-06	5.11712e-06	THBS4/CCL19/NCKAP1L/CCR7/RAC2/C5AR1/CCL21/C3AR1/CMKLR1/DYSF/CAMK1D/BST1/CCL5/CD74	14
GO_REGULATION_OF_METAL_ION_TRANSPORT	GO_REGULATION_OF_METAL_ION_TRANSPORT	52/1098	400/18046	1.81263e-07	6.80918e-06	5.11712e-06	MYLK/HTR2A/FLNA/SLC8A1/ATP2B4/BCL2/AKAP6/RGS4/CD19/FCRL3/PIK3CG/PLCG2/CORO1A/CLIC2/TLR9/KCNIP1/P2RY12/THY1/CACNA2D1/KCNA1/SLMAP/PRNP/REM1/EHD3/NOS1/CNTN1/NKX2-5/FXYD2/F2R/P2RX7/CXCR4/CCL2/CD84/CD4/STAC/PDE4B/PDGFRB/TREM2/SERPINE2/DYSF/LRRC55/HAMP/GJA1/LILRB1/APLNR/CCR1/ADORA1/AGT/CCL5/KCNC2/KEL/GCG	52
GO_POSITIVE_REGULATION_OF_SMALL_GTPASE_MEDIATED_SIGNAL_TRANSDUCTION	GO_POSITIVE_REGULATION_OF_SMALL_GTPASE_MEDIATED_SIGNAL_TRANSDUCTION	18/1098	72/18046	2.04588e-07	7.6301e-06	5.73404e-06	IGF1/P2RY8/LPAR4/GPR18/CDON/VAV1/COL3A1/DGKI/GPR65/P2RY10/ROBO1/F2R/NOTCH2/RELN/PDGFRB/JAK2/RASGRP1/RASGRF1	18
GO_INTEGRIN_MEDIATED_SIGNALING_PATHWAY	GO_INTEGRIN_MEDIATED_SIGNALING_PATHWAY	22/1098	104/18046	2.31435e-07	8.5697e-06	6.44015e-06	FLNA/ITGA1/THY1/VAV1/TLN1/COL3A1/ITGBL1/ITGB3/ITGAD/TIMP1/CD40LG/NRP1/ITGA4/ITGAL/TYROBP/ITGB2/PLEK/BST1/FERMT3/SEMA7A/ITGA11/ITGAM	22
GO_CORECEPTOR_ACTIVITY	GO_CORECEPTOR_ACTIVITY	14/1098	45/18046	2.47122e-07	9.08566e-06	6.8279e-06	FCRL1/LILRA4/GPC6/NGFR/ITGB3/CD28/LY96/CXCR4/RAMP2/NRP1/ITGA4/CD4/CCR5/CD86	14
GO_MESENCHYME_DEVELOPMENT	GO_MESENCHYME_DEVELOPMENT	40/1098	276/18046	2.8439e-07	1.03822e-05	7.80227e-06	BNC2/MEF2C/ACTG2/BCL2/WWTR1/EPHA3/GREM1/NRP2/EDNRA/FRZB/SFRP2/BASP1/LDLRAD4/ROBO1/NKX2-5/HEYL/ENG/NRP1/DAB2/PDGFRB/SIX2/TGFB1/FN1/COL1A1/SEMA6B/TGFB2/EOMES/ALDH1A2/SEMA3C/SEMA7A/CRB2/FAM83D/HTR2B/DAND5/WT1/TWIST1/TIAM1/IL6/FOXC2/SEMA3A	40
GO_LEUKOCYTE_MEDIATED_CYTOTOXICITY	GO_LEUKOCYTE_MEDIATED_CYTOTOXICITY	22/1098	106/18046	3.28762e-07	1.19081e-05	8.94897e-06	CD1C/STAP1/FCGR2B/CORO1A/ELANE/VAV1/PTPRC/CD1E/P2RX7/SLAMF6/TYROBP/SH2D1A/NCR3/LILRB1/IL12B/HAVCR2/IL12RB1/IL21/CRTAM/RASGRP1/ITGAM/KIR3DL1	22
GO_PEPTIDE_ANTIGEN_BINDING	GO_PEPTIDE_ANTIGEN_BINDING	11/1098	28/18046	3.30781e-07	1.19081e-05	8.94897e-06	TRAV8-4/TRAV29DV5/TRGV3/TRBV7-9/CD209/HLA-DPB1/HLA-DRA/TRBV12-3/TRAV19/HLA-DPA1/HLA-DQA1	11
GO_POSTSYNAPTIC_MEMBRANE	GO_POSTSYNAPTIC_MEMBRANE	45/1098	331/18046	3.41631e-07	1.2206e-05	9.17282e-06	HTR2A/SLC8A1/KCNMA1/PJA2/CHRNA3/SSPN/NRP2/NCS1/KCNA1/IGSF21/DGKI/SORCS2/SHISA8/CNTN1/ITGB3/DRP2/SHC4/SYNDIG1/KCTD12/F2R/GRIN2A/RGS7BP/GLRA3/NRP1/CHRNB4/CHRNA6/LRRTM3/KCNA3/PCDH17/LZTS1/LRRC4C/IL1RAPL1/CNIH2/ADORA1/RPH3A/KCND2/GRIK1/GRID1/KCND3/NLGN4X/TIAM1/KCNC2/GRM7/TENM2/SHANK1	45
GO_POSITIVE_REGULATION_OF_B_CELL_ACTIVATION	GO_POSITIVE_REGULATION_OF_B_CELL_ACTIVATION	26/1098	141/18046	3.43764e-07	1.2206e-05	9.17282e-06	MEF2C/BCL2/TNFRSF13C/FCRL3/NCKAP1L/SASH3/TLR9/GPR183/CD27/PTPRC/CD28/TNFSF13B/IGHV1OR15-1/TGFB1/TLR4/TRBC2/BST1/INPP5D/IL21/IGHG4/IL5/CD38/CD74/IL6/IGHV1-69-2/IGHV3-20	26
GO_POSITIVE_T_CELL_SELECTION	GO_POSITIVE_T_CELL_SELECTION	12/1098	34/18046	3.80665e-07	1.34243e-05	1.00884e-05	BCL2/PTPRC/SLAMF6/SPN/CD3G/IL12B/CD3D/THEMIS/CD3E/IL12RB1/CD74/IL6	12
GO_REGULATION_OF_TRANS_SYNAPTIC_SIGNALING	GO_REGULATION_OF_TRANS_SYNAPTIC_SIGNALING	55/1098	444/18046	3.9686e-07	1.39008e-05	1.04465e-05	BCHE/MEF2C/HTR2A/MAP1A/PRKCB/SYT11/MAP1B/RGS4/CNR2/CHRNA3/TACR2/NCS1/CDH11/CX3CR1/SYT4/PRNP/TAC1/DGKI/SORCS2/TNR/SHISA8/NPTX1/F2R/GRIN2A/CCL2/RELN/NTNG2/TYROBP/MAPT/CHRNB4/CHRNA6/SRGN/SERPINE2/DRD5/SLC4A10/PCDH17/LZTS1/KMO/LRRC4C/CNIH2/APOE/ADORA1/GRIK1/AGT/GRID1/JAK2/NLGN4X/SYN1/CALB2/CD38/GRM7/RASGRF1/GIP/SHANK1/NRG3	55
GO_CELLULAR_RESPONSE_TO_BIOTIC_STIMULUS	GO_CELLULAR_RESPONSE_TO_BIOTIC_STIMULUS	37/1098	249/18046	4.21312e-07	1.46583e-05	1.10157e-05	MEF2C/LY86/STAP1/AXL/VIM/TLR6/FCGR2B/SCIMP/CX3CR1/CD180/TLR1/ABCA1/LY96/CXCL13/CCL2/PDE4B/CD6/TGFB1/TLR4/TREM2/CCR5/HAMP/PDCD1LG2/LILRB1/BPI/IL12B/CD86/CD14/HAVCR2/KMO/AICDA/MRC1/CD274/CCL5/NLRP3/CEBPE/IL6	37
GO_INTERLEUKIN_1_PRODUCTION	GO_INTERLEUKIN_1_PRODUCTION	23/1098	116/18046	4.24471e-07	1.46697e-05	1.10243e-05	IGF1/TLR6/CCL19/CX3CR1/SUCNR1/S1PR3/ABCA1/CCR7/F2R/P2RX7/PYHIN1/IFI16/TYROBP/TLR4/TREM2/NLRC4/HAVCR2/MNDA/JAK2/NLRP3/TLR8/AIM2/GBP5	23
GO_B_CELL_MEDIATED_IMMUNITY	GO_B_CELL_MEDIATED_IMMUNITY	34/1098	219/18046	4.36296e-07	1.488e-05	1.11824e-05	GAPT/POU2F2/CD19/FCGR2B/FGL2/FCER2/C4A/CD27/PTPRC/C4B/SWAP70/CR1/CD28/CR2/LTA/CD40LG/IGHV1OR15-1/TGFB1/C3/TRBC2/C1QA/C1QC/AICDA/INPP5D/C1QB/CD70/IGHG4/TLR8/CD74/IGKV2D-30/IGKV2-29/IGHV1-69-2/IGHV3-20/IGKV4-1	34
GO_CYTOKINE_ACTIVITY	GO_CYTOKINE_ACTIVITY	34/1098	219/18046	4.36296e-07	1.488e-05	1.11824e-05	CCL19/GREM1/EBI3/TNFSF8/BMP3/CXCL13/LTA/CMTM3/CCL2/TIMP1/CCL21/CD40LG/TNFSF13B/TGFB1/LTB/LEFTY2/CCL13/IL12B/TGFB2/IL34/IL21/CCL26/CD70/CCL22/GDF5/CCL5/SCG2/CCL17/SPP1/IL5/IL6/XCL2/GDF3/TNFSF18	34
GO_PHOSPHOLIPASE_C_ACTIVATING_G_PROTEIN_COUPLED_RECEPTOR_SIGNALING_PATHWAY	GO_PHOSPHOLIPASE_C_ACTIVATING_G_PROTEIN_COUPLED_RECEPTOR_SIGNALING_PATHWAY	22/1098	108/18046	4.62489e-07	1.56702e-05	1.17762e-05	P2RY8/HTR2A/LPAR4/TACR1/GRPR/GPR18/CX3CR1/P2RY12/GPR65/GNG13/P2RY10/F2R/C5AR1/C3AR1/CMKLR1/DRD5/FPR3/HTR2B/AGT/NPR3/FPR1/GNA14	22
GO_POSITIVE_REGULATION_OF_NEUTROPHIL_MIGRATION	GO_POSITIVE_REGULATION_OF_NEUTROPHIL_MIGRATION	11/1098	29/18046	5.03674e-07	1.68454e-05	1.26594e-05	THBS4/CCL19/NCKAP1L/CCR7/RAC2/C5AR1/CCL21/C3AR1/DYSF/CAMK1D/CD74	11
GO_SUBSTRATE_DEPENDENT_CELL_MIGRATION	GO_SUBSTRATE_DEPENDENT_CELL_MIGRATION	11/1098	29/18046	5.03674e-07	1.68454e-05	1.26594e-05	NRP2/P2RY12/VEGFC/PTPRC/FMNL1/ROBO1/NRP1/FN1/MYH10/ITGA11/SEMA3A	11
GO_EXTRACELLULAR_MATRIX_STRUCTURAL_CONSTITUENT_CONFERRING_TENSILE_STRENGTH	GO_EXTRACELLULAR_MATRIX_STRUCTURAL_CONSTITUENT_CONFERRING_TENSILE_STRENGTH	13/1098	41/18046	5.19189e-07	1.71432e-05	1.28831e-05	COL14A1/COL6A6/COL8A1/COL3A1/COL15A1/COL6A3/COL5A1/COL1A2/COL1A1/COL4A2/COL5A2/COL12A1/COL10A1	13
GO_MHC_PROTEIN_BINDING	GO_MHC_PROTEIN_BINDING	13/1098	41/18046	5.19189e-07	1.71432e-05	1.28831e-05	CD4/FCRL6/TRAV8-4/LILRB1/TRAV29DV5/TRGV3/TRBV7-9/KIR2DS4/PILRA/TRBV12-3/KIR3DL2/CD74/TRAV19	13
GO_CYTOKINE_RECEPTOR_BINDING	GO_CYTOKINE_RECEPTOR_BINDING	40/1098	283/18046	5.53526e-07	1.81613e-05	1.36482e-05	STAP1/CCL19/GREM1/TLR9/VEGFC/EBI3/TNFSF8/ITGB3/BMP3/CXCL13/GATA3/LTA/CCL2/ENG/CCL21/CD40LG/TNFSF13B/TGFB1/LTB/CDH5/LEFTY2/CCL13/PXDN/IL12B/TGFB2/IL34/IL12RB1/IL21/CCL26/JAK2/CD70/CCL22/GDF5/CCL5/CCL17/IL5/IL6/XCL2/GDF3/TNFSF18	40
GO_NEGATIVE_REGULATION_OF_CELL_ADHESION	GO_NEGATIVE_REGULATION_OF_CELL_ADHESION	41/1098	294/18046	5.74787e-07	1.87402e-05	1.40833e-05	GLI3/DTX1/PRKG1/ARHGDIB/FCGR2B/LPXN/PLXNA4/FGL2/TNC/LGALS1/PRNP/PTPRC/TNR/TNFAIP8L2/SPOCK1/SWAP70/PDE5A/SPN/PLXNC1/CCL21/MYADM/GPNMB/TGFB1/JAK3/SERPINE2/COL1A1/PDCD1LG2/LILRB1/CD86/HAVCR2/POSTN/TIGIT/TGFBI/LAX1/PLA2G2D/JAK2/CD274/SOCS1/CD74/ADAMDEC1/IDO1	41
GO_ALPHA_BETA_T_CELL_DIFFERENTIATION	GO_ALPHA_BETA_T_CELL_DIFFERENTIATION	21/1098	101/18046	5.86963e-07	1.90176e-05	1.42918e-05	GLI3/BCL2/CCL19/NCKAP1L/SASH3/GPR18/GPR183/TNFSF8/GATA3/SLAMF6/SPN/JAK3/CD83/IL12B/CD86/EOMES/PLA2G2D/IL12RB1/NLRP3/SOCS1/IL6	21
GO_CONNECTIVE_TISSUE_DEVELOPMENT	GO_CONNECTIVE_TISSUE_DEVELOPMENT	39/1098	274/18046	6.38573e-07	2.05613e-05	1.54518e-05	MGP/MEF2C/GLI3/COL14A1/ZEB1/LUM/GREM1/EVC/FRZB/SFRP2/CHST11/NKX3-2/NPPC/EBF2/CTSK/SH3PXD2B/BGN/COL6A3/BMP3/EPYC/PRRX1/GLI2/LOX/TIMP1/COL5A1/CHRDL2/PDGFRB/SIX2/TGFB1/CD44/COL1A1/SULF1/TRPS1/TGFBI/WT1/COL12A1/GDF5/FOXC2/MATN2	39
GO_PLATELET_DEGRANULATION	GO_PLATELET_DEGRANULATION	24/1098	128/18046	7.02333e-07	2.24312e-05	1.68571e-05	IGF1/FLNA/A2M/SELP/VEGFC/TLN1/ACTN1/VCL/ISLR/ITGB3/LHFPL2/PECAM1/SPARC/TIMP1/TGFB1/SRGN/FN1/PCDH7/LEFTY2/PLEK/TGFB2/FERMT3/CD109/CTSW	24
GO_GROWTH_FACTOR_BINDING	GO_GROWTH_FACTOR_BINDING	25/1098	137/18046	7.05302e-07	2.24312e-05	1.68571e-05	LTBP1/A2M/IGFBP7/NRP2/COL3A1/NGFR/NRROS/IGFBP4/SRPX2/LTBP2/ITGB3/HTRA1/CXCL13/CRIM1/ENG/COL5A1/COL1A2/NRP1/HTRA3/PDGFRB/COL1A1/CD93/CRLF2/PXDN/CD109	25
GO_REGULATION_OF_CELL_KILLING	GO_REGULATION_OF_CELL_KILLING	20/1098	94/18046	7.36015e-07	2.32653e-05	1.74839e-05	CD1C/STAP1/FCGR2B/FCER2/VAV1/PTPRC/CD1E/P2RX7/SLAMF6/TYROBP/SH2D1A/NCR3/LILRB1/IL12B/HAVCR2/IL12RB1/IL21/CRTAM/RASGRP1/ITGAM	20
GO_SMOOTH_MUSCLE_CONTRACTION	GO_SMOOTH_MUSCLE_CONTRACTION	22/1098	111/18046	7.58349e-07	2.3826e-05	1.79053e-05	MYLK/HTR2A/SLC8A1/CNN1/KCNMA1/ATP2B4/PRKG1/MYH11/CHRNA3/TACR2/TACR1/EDNRA/SPX/F2R/CHRNB4/SULF1/CALCRL/HTR2B/ADORA1/AGT/TIFAB/CD38	22
GO_DETECTION_OF_MOLECULE_OF_BACTERIAL_ORIGIN	GO_DETECTION_OF_MOLECULE_OF_BACTERIAL_ORIGIN	7/1098	11/18046	8.05222e-07	2.49324e-05	1.87368e-05	SSC5D/TLR6/C4B/TLR1/LY96/TLR4/TREM2	7
GO_SYNAPSE_PRUNING	GO_SYNAPSE_PRUNING	7/1098	11/18046	8.05222e-07	2.49324e-05	1.87368e-05	CX3CR1/TREM2/C3/C1QA/C1QC/C1QB/ITGAM	7
GO_REGULATION_OF_MACROPHAGE_ACTIVATION	GO_REGULATION_OF_MACROPHAGE_ACTIVATION	15/1098	56/18046	8.07996e-07	2.49324e-05	1.87368e-05	IL31RA/SYT11/STAP1/PJA2/TLR6/FCGR2B/PTPRC/CD200/TLR4/TREM2/BPI/HAVCR2/CD74/IL6/CST7	15
GO_BASEMENT_MEMBRANE	GO_BASEMENT_MEMBRANE	20/1098	95/18046	8.79643e-07	2.69826e-05	2.02775e-05	CCDC80/THBS4/HMCN1/LAMA4/TNC/FBN1/COL8A1/COL15A1/SPARC/LOXL1/TIMP1/COL5A1/FN1/COL4A2/NTN3/THBS2/FREM1/TGFBI/EGFL6/MATN2	20
GO_POSITIVE_REGULATION_OF_CELL_ADHESION_MEDIATED_BY_INTEGRIN	GO_POSITIVE_REGULATION_OF_CELL_ADHESION_MEDIATED_BY_INTEGRIN	9/1098	20/18046	1.0084e-06	3.05704e-05	2.29737e-05	NCKAP1L/P2RY12/SFRP2/CXCL13/CCL21/TGFB2/CD3E/CCL5/FOXC2	9
GO_REGULATION_OF_ANTIGEN_PROCESSING_AND_PRESENTATION	GO_REGULATION_OF_ANTIGEN_PROCESSING_AND_PRESENTATION	9/1098	20/18046	1.0084e-06	3.05704e-05	2.29737e-05	WAS/FCGR2B/CCL19/FGL2/CCR7/CCL21/TREM2/HLA-DOA/CD74	9
GO_REGULATION_OF_NEUTROPHIL_MIGRATION	GO_REGULATION_OF_NEUTROPHIL_MIGRATION	12/1098	37/18046	1.08468e-06	3.26918e-05	2.4568e-05	THBS4/CCL19/NCKAP1L/CCR7/RAC2/C5AR1/CCL21/C3AR1/DYSF/CAMK1D/BST1/CD74	12
GO_POSITIVE_REGULATION_OF_TUMOR_NECROSIS_FACTOR_SUPERFAMILY_CYTOKINE_PRODUCTION	GO_POSITIVE_REGULATION_OF_TUMOR_NECROSIS_FACTOR_SUPERFAMILY_CYTOKINE_PRODUCTION	19/1098	88/18046	1.09452e-06	3.27977e-05	2.46476e-05	CCL19/SASH3/TLR9/PTPRC/TLR1/LY96/ZBTB20/SPN/TYROBP/TLR4/CYBB/IL12B/CD86/CD14/HAVCR2/CD2/JAK2/RASGRP1/TWIST1	19
GO_DETECTION_OF_BIOTIC_STIMULUS	GO_DETECTION_OF_BIOTIC_STIMULUS	11/1098	31/18046	1.10115e-06	3.28067e-05	2.46544e-05	SSC5D/TLR6/C4B/TLR1/LY96/FAP/TLR4/TREM2/NLRC4/CRTAM/NLRP3	11
GO_POSITIVE_REGULATION_OF_PEPTIDE_SECRETION	GO_POSITIVE_REGULATION_OF_PEPTIDE_SECRETION	40/1098	292/18046	1.25031e-06	3.70379e-05	2.78341e-05	IGF1/CCL19/VEGFC/RAB8B/TLR1/CLEC9A/F2R/AIF1/GATA3/P2RX7/AGTR2/TGFB1/TLR4/TREM2/TRIM6/GJA1/CRLF2/CD14/HAVCR2/TGFB2/POSTN/CD2/MYH10/HTR2B/UCN3/ADORA1/CRTAM/JAK2/CD274/RASGRP1/NLRP3/TWIST1/TLR8/IL5/CD38/DOC2B/IL6/AIM2/GIP/GCG	40
GO_EXTRACELLULAR_MATRIX_DISASSEMBLY	GO_EXTRACELLULAR_MATRIX_DISASSEMBLY	18/1098	81/18046	1.33904e-06	3.94408e-05	2.96399e-05	A2M/ELANE/TIMP2/LCP1/CTSK/ETS1/SH3PXD2B/HTRA1/MMP2/TIMP1/MMP16/FAP/TGFB1/CD44/CTSL/IL6/CTRB1/MMP7	18
GO_T_CELL_ACTIVATION_INVOLVED_IN_IMMUNE_RESPONSE	GO_T_CELL_ACTIVATION_INVOLVED_IN_IMMUNE_RESPONSE	21/1098	106/18046	1.35548e-06	3.96996e-05	2.98343e-05	CD1C/FCGR2B/CCL19/FGL2/GPR183/LCP1/GATA3/SLAMF6/SPN/ITGAL/JAK3/LILRB1/IL12B/CD86/HAVCR2/EOMES/HLA-DMB/IL12RB1/NLRP3/IL6/TNFSF18	21
GO_REGULATION_OF_PRODUCTION_OF_MOLECULAR_MEDIATOR_OF_IMMUNE_RESPONSE	GO_REGULATION_OF_PRODUCTION_OF_MOLECULAR_MEDIATOR_OF_IMMUNE_RESPONSE	25/1098	142/18046	1.4078e-06	4.10001e-05	3.08117e-05	CD22/FCGR2B/FCRL3/SASH3/SCIMP/TLR9/PTPRC/CD28/GATA3/CD40LG/TGFB1/TLR4/JAK3/TRIM6/LILRB1/TGFB2/SEMA7A/TRIL/CD96/NLRP3/IL5/CD74/CLNK/IL6/CLC	25
GO_COLLAGEN_METABOLIC_PROCESS	GO_COLLAGEN_METABOLIC_PROCESS	22/1098	115/18046	1.42217e-06	4.11842e-05	3.095e-05	VIM/MRC2/NPPC/CTSK/COL15A1/MMP2/F2R/P2RX7/ENG/MMP16/COL5A1/COL1A2/FAP/PDGFRB/TGFB1/COL1A1/CTSL/RCN3/CIITA/ADAMTS2/IL6/MMP7	22
GO_CARTILAGE_DEVELOPMENT	GO_CARTILAGE_DEVELOPMENT	32/1098	210/18046	1.43669e-06	4.11842e-05	3.095e-05	MGP/MEF2C/GLI3/COL14A1/ZEB1/LUM/GREM1/EVC/FRZB/SFRP2/CHST11/NKX3-2/NPPC/CTSK/BGN/COL6A3/BMP3/EPYC/PRRX1/GLI2/TIMP1/CHRDL2/SIX2/TGFB1/CD44/COL1A1/SULF1/TRPS1/TGFBI/COL12A1/GDF5/MATN2	32
GO_G_PROTEIN_COUPLED_CHEMOATTRACTANT_RECEPTOR_ACTIVITY	GO_G_PROTEIN_COUPLED_CHEMOATTRACTANT_RECEPTOR_ACTIVITY	10/1098	26/18046	1.4459e-06	4.11842e-05	3.095e-05	CX3CR1/CCR7/CXCR4/CCR4/CCR5/CMKLR1/CCR1/CXCR5/CXCR3/CCR9	10
GO_LEUKOCYTE_TETHERING_OR_ROLLING	GO_LEUKOCYTE_TETHERING_OR_ROLLING	10/1098	26/18046	1.4459e-06	4.11842e-05	3.095e-05	SELP/ELANE/CX3CR1/SELL/VCAM1/SPN/CCL21/ITGA4/ADD2/SELPLG	10
GO_B_CELL_ACTIVATION_INVOLVED_IN_IMMUNE_RESPONSE	GO_B_CELL_ACTIVATION_INVOLVED_IN_IMMUNE_RESPONSE	17/1098	74/18046	1.60372e-06	4.54301e-05	3.41408e-05	GAPT/CD19/FCGR2B/PLCG2/LGALS1/GPR183/CD180/PTPRC/DOCK10/SWAP70/CD28/DOCK11/NOTCH2/CD40LG/TGFB1/TLR4/AICDA	17
GO_REGULATION_OF_TRANSMEMBRANE_RECEPTOR_PROTEIN_SERINE_THREONINE_KINASE_SIGNALING_PATHWAY	GO_REGULATION_OF_TRANSMEMBRANE_RECEPTOR_PROTEIN_SERINE_THREONINE_KINASE_SIGNALING_PATHWAY	35/1098	242/18046	1.63194e-06	4.5978e-05	3.45526e-05	ZEB1/FSTL1/ASPN/LTBP1/WWTR1/FBN1/GREM1/RNF165/ZNF423/SFRP2/CHST11/NRROS/LDLRAD4/SFRP4/HTRA1/BMP3/NOTCH2/LOX/DKK3/ENG/NREP/DAB2/HTRA3/TGFB1/CDH5/LEFTY2/FZD1/SULF1/TGFB2/CRB2/DAND5/CD109/GDF5/CAV2/GDF3	35
GO_COMPLEMENT_BINDING	GO_COMPLEMENT_BINDING	9/1098	21/18046	1.66939e-06	4.65276e-05	3.49656e-05	C4A/C4B/CR1/CR2/C5AR1/ITGB2/CD93/ITGAM/MEGF10	9
GO_THYMIC_T_CELL_SELECTION	GO_THYMIC_T_CELL_SELECTION	9/1098	21/18046	1.66939e-06	4.65276e-05	3.49656e-05	GLI3/PTPRC/CD28/CCR7/GATA3/CD3G/CD3D/CD3E/CD74	9
GO_NEGATIVE_T_CELL_SELECTION	GO_NEGATIVE_T_CELL_SELECTION	7/1098	12/18046	1.83061e-06	5.07481e-05	3.81373e-05	GLI3/PTPRC/CD28/CCR7/THEMIS/CD3E/CD74	7
GO_PHAGOCYTIC_CUP	GO_PHAGOCYTIC_CUP	10/1098	27/18046	2.17142e-06	5.98758e-05	4.49968e-05	SYT11/ARHGAP25/CORO1A/RAB31/MYO1G/LCP1/BIN2/AIF1/TLR4/MEGF10	10
GO_NEGATIVE_REGULATION_OF_CELL_CELL_ADHESION	GO_NEGATIVE_REGULATION_OF_CELL_CELL_ADHESION	29/1098	184/18046	2.21375e-06	6.07199e-05	4.56312e-05	GLI3/DTX1/PRKG1/FCGR2B/FGL2/PRNP/TNR/TNFAIP8L2/SWAP70/PDE5A/SPN/CCL21/MYADM/GPNMB/TGFB1/JAK3/SERPINE2/PDCD1LG2/LILRB1/CD86/HAVCR2/TIGIT/LAX1/PLA2G2D/JAK2/CD274/SOCS1/CD74/IDO1	29
GO_MHC_PROTEIN_COMPLEX	GO_MHC_PROTEIN_COMPLEX	9/1098	22/18046	2.67264e-06	7.26031e-05	5.45614e-05	HLA-DQA2/HLA-DMB/HLA-DQB2/HLA-DPB1/HLA-DRA/HLA-DOA/CD74/HLA-DPA1/HLA-DQA1	9
GO_MESENCHYMAL_CELL_DIFFERENTIATION	GO_MESENCHYMAL_CELL_DIFFERENTIATION	32/1098	216/18046	2.675e-06	7.26031e-05	5.45614e-05	MEF2C/BCL2/WWTR1/EPHA3/GREM1/NRP2/EDNRA/FRZB/SFRP2/LDLRAD4/HEYL/ENG/NRP1/DAB2/SIX2/TGFB1/FN1/COL1A1/SEMA6B/TGFB2/EOMES/ALDH1A2/SEMA3C/SEMA7A/CRB2/FAM83D/HTR2B/TWIST1/TIAM1/IL6/FOXC2/SEMA3A	32
GO_LEUKOCYTE_HOMEOSTASIS	GO_LEUKOCYTE_HOMEOSTASIS	18/1098	85/18046	2.80662e-06	7.57787e-05	5.69479e-05	GAPT/MEF2C/BCL2/AXL/NCKAP1L/CORO1A/SIT1/GPR183/PIK3CD/LMO1/DOCK10/P2RX7/DOCK11/TNFSF13B/PDE4B/JAK3/CD74/IL6	18
GO_SYNAPTIC_MEMBRANE	GO_SYNAPTIC_MEMBRANE	52/1098	438/18046	2.93996e-06	7.86941e-05	5.91388e-05	IL31RA/HTR2A/SLC8A1/KCNMA1/ATP2B4/SYT11/PJA2/CHRNA3/SSPN/NRP2/NCS1/KCNA1/IGSF21/DGKI/SORCS2/SHISA8/SRPX2/CNTN1/ITGB3/DRP2/SHC4/SYNDIG1/KCTD12/F2R/GRIN2A/RGS7BP/GLRA3/NRP1/NTNG2/CHRNB4/CHRNA6/LRRTM3/KCNA3/STX11/PCDH17/LZTS1/LRRC4C/IL1RAPL1/CNIH2/ADORA1/RPH3A/KCND2/GRIK1/GRID1/KCND3/NLGN4X/TIAM1/KCNC2/CALB2/GRM7/TENM2/SHANK1	52
GO_REGULATION_OF_CELL_ADHESION_MEDIATED_BY_INTEGRIN	GO_REGULATION_OF_CELL_ADHESION_MEDIATED_BY_INTEGRIN	13/1098	47/18046	2.94496e-06	7.86941e-05	5.91388e-05	LPXN/PIK3CG/NCKAP1L/P2RY12/SFRP2/SWAP70/CXCL13/CCL21/TGFB2/FERMT3/CD3E/CCL5/FOXC2	13
GO_DENDRITIC_CELL_MIGRATION	GO_DENDRITIC_CELL_MIGRATION	10/1098	28/18046	3.194e-06	8.49113e-05	6.38111e-05	PIK3CG/CCL19/GPR183/CCR7/CXCR4/DOCK8/CCL21/CCR5/CCR1/CCL5	10
GO_HETEROTYPIC_CELL_CELL_ADHESION	GO_HETEROTYPIC_CELL_CELL_ADHESION	15/1098	62/18046	3.27832e-06	8.67081e-05	6.51614e-05	PARVA/CTNNA3/THY1/PTPRC/CD200/VCAM1/ITGB3/ITGAD/ITGA4/MYADM/CD200R1/CD44/ITGB2/CD2/LCK	15
GO_RESPONSE_TO_INTERFERON_GAMMA	GO_RESPONSE_TO_INTERFERON_GAMMA	30/1098	198/18046	3.41782e-06	8.9939e-05	6.75894e-05	VIM/WAS/CCL19/VCAM1/AIF1/CCL2/CCL21/TLR4/CD44/CCL13/HLA-DQA2/IL12B/HLA-DQB2/MRC1/CIITA/IL12RB1/HLA-DPB1/CCL26/JAK2/CCL22/HLA-DRA/CCL5/CCL17/SOCS1/GBP4/FCGR1A/HLA-DPA1/XCL2/HLA-DQA1/GBP5	30
GO_T_CELL_DIFFERENTIATION_IN_THYMUS	GO_T_CELL_DIFFERENTIATION_IN_THYMUS	16/1098	70/18046	3.47098e-06	9.08765e-05	6.82939e-05	GLI3/ZEB1/BCL2/TESPA1/PTPRC/MAFB/CD28/CCR7/GLI2/GATA3/CD3G/CD3D/CD3E/RASGRP1/CD74/EGR3	16
GO_REGULATION_OF_CALCIUM_ION_TRANSPORT	GO_REGULATION_OF_CALCIUM_ION_TRANSPORT	36/1098	261/18046	3.58134e-06	9.32947e-05	7.01112e-05	MYLK/SLC8A1/BCL2/AKAP6/RGS4/CD19/FCRL3/PIK3CG/PLCG2/CORO1A/CLIC2/TLR9/P2RY12/THY1/CACNA2D1/PRNP/REM1/EHD3/NOS1/F2R/P2RX7/CXCR4/CCL2/CD84/CD4/STAC/PDE4B/PDGFRB/DYSF/GJA1/LILRB1/APLNR/CCR1/AGT/CCL5/GCG	36
GO_ERK1_AND_ERK2_CASCADE	GO_ERK1_AND_ERK2_CASCADE	41/1098	316/18046	3.74336e-06	9.69054e-05	7.28246e-05	IGF1/HTR2A/CCL19/SCIMP/GPR183/PTPRC/CCR7/F2R/NOTCH2/C5AR1/CCL2/CCL21/NRP1/CD4/GPNMB/PDGFRB/TGFB1/TLR4/CD44/FN1/TREM2/NOX4/RRAS/CCL13/HAVCR2/DUSP10/SEMA7A/CCR1/FAM83D/HTR2B/APOE/CCL26/AGT/CCL22/RASGRP1/CCL5/TIAM1/CCL17/CD74/XCL2/GCG	41
GO_COMPLEMENT_RECEPTOR_MEDIATED_SIGNALING_PATHWAY	GO_COMPLEMENT_RECEPTOR_MEDIATED_SIGNALING_PATHWAY	7/1098	13/18046	3.75733e-06	9.69054e-05	7.28246e-05	CR1/CR2/C5AR1/C3AR1/CMKLR1/FPR3/FPR1	7
GO_POSITIVE_REGULATION_OF_SECRETION	GO_POSITIVE_REGULATION_OF_SECRETION	51/1098	431/18046	4.02059e-06	0.000103182	7.75415e-05	IGF1/TACR2/CCL19/NCS1/VEGFC/SYT4/TAC1/RAB8B/TLR1/CLEC9A/F2R/AIF1/GATA3/P2RX7/AGTR2/TGFB1/TLR4/AQP1/TREM2/TRIM6/ITGB2/GJA1/CRLF2/CD14/HAVCR2/TGFB2/KMO/POSTN/CD2/MYH10/HTR2B/UCN3/ADORA1/AGT/CRTAM/JAK2/CD274/RASGRP1/NLRP3/TWIST1/TLR8/SPP1/IL5/CD38/ITGAM/DOC2B/IL6/CYP19A1/AIM2/GIP/GCG	51
GO_LYMPHOCYTE_CHEMOTAXIS	GO_LYMPHOCYTE_CHEMOTAXIS	15/1098	63/18046	4.06302e-06	0.000103757	7.79738e-05	PIK3CG/CCL19/GPR183/PIK3CD/CXCL13/CCL2/CCL21/CYP7B1/CCL13/CCL26/CCL22/CCL5/CXCR3/CCL17/XCL2	15
GO_INTERLEUKIN_4_PRODUCTION	GO_INTERLEUKIN_4_PRODUCTION	11/1098	35/18046	4.33117e-06	0.000110063	8.27123e-05	CLECL1/SASH3/CD28/GATA3/NOTCH2/CD40LG/CD83/CD86/HAVCR2/CD3E/NLRP3	11
GO_REGULATION_OF_B_CELL_RECEPTOR_SIGNALING_PATHWAY	GO_REGULATION_OF_B_CELL_RECEPTOR_SIGNALING_PATHWAY	10/1098	29/18046	4.60996e-06	0.00011646	8.752e-05	CD22/PRKCB/STAP1/CD19/FCGR2B/LPXN/FCRL3/PAX5/CMTM3/NFAM1	10
GO_NEGATIVE_REGULATION_OF_INTERLEUKIN_10_PRODUCTION	GO_NEGATIVE_REGULATION_OF_INTERLEUKIN_10_PRODUCTION	8/1098	18/18046	4.62785e-06	0.00011646	8.752e-05	FCGR2B/TYROBP/JAK3/PDCD1LG2/LILRB1/IL12B/CD274/IDO1	8
GO_PEPTIDE_BINDING	GO_PEPTIDE_BINDING	39/1098	297/18046	4.80239e-06	0.000120269	9.03822e-05	BCHE/CD1C/TLR6/FCGR2B/GRPR/PRNP/NGFR/CD1E/TLR1/MSR1/GRIN2A/RAMP2/TLR4/TREM2/ITGB2/TRAV8-4/TRAV29DV5/TRGV3/CALCRL/CD14/TGFB2/TRBV7-9/C1QA/APOE/CD209/HLA-DPB1/FOLH1/NPR3/ENPEP/HLA-DRA/TRBV12-3/CD74/TRAV19/ITGAM/HLA-DPA1/HLA-DQA1/NPBWR1/ANPEP/GPR1	39
GO_NEGATIVE_REGULATION_OF_LEUKOCYTE_APOPTOTIC_PROCESS	GO_NEGATIVE_REGULATION_OF_LEUKOCYTE_APOPTOTIC_PROCESS	13/1098	49/18046	4.90599e-06	0.000122272	9.1888e-05	AXL/CCL19/CD27/CCR7/DOCK8/CCL21/JAK3/CCR5/LILRB1/PTCRA/CCL5/CD74/IDO1	13
GO_NEGATIVE_REGULATION_OF_LEUKOCYTE_PROLIFERATION	GO_NEGATIVE_REGULATION_OF_LEUKOCYTE_PROLIFERATION	17/1098	80/18046	5.01768e-06	0.000124061	9.32322e-05	FCGR2B/GREM1/PRNP/PDE5A/SPN/LST1/GPNMB/TYROBP/PDCD1LG2/LILRB1/CD86/HAVCR2/INPP5D/PLA2G2D/MNDA/CD274/IDO1	17
GO_REGULATION_OF_HUMORAL_IMMUNE_RESPONSE	GO_REGULATION_OF_HUMORAL_IMMUNE_RESPONSE	23/1098	133/18046	5.02562e-06	0.000124061	9.32322e-05	CD19/A2M/FCGR2B/FCER2/C4A/PTPRC/C4B/CR1/CR2/CCR7/CXCL13/LTA/C5AR1/C3AR1/IGHV1OR15-1/C3/C1QA/C1QC/C1QB/IGHG4/IGKV2D-30/IGKV2-29/IGKV4-1	23
GO_COAGULATION	GO_COAGULATION	43/1098	343/18046	5.34284e-06	0.000131267	9.86473e-05	FLNA/PRKCB/GNG2/PRKG1/AXL/A2M/WAS/PIK3CG/PLCG2/SELP/ENTPD1/P2RY12/VAV1/TLN1/COL3A1/EHD2/DGKI/DGKG/EHD3/VCL/ITGB3/F2R/GATA3/P2RX7/DOCK11/TREML1/DOCK8/CD40LG/COL1A2/SH2B2/FAP/TLR4/SERPINE2/COL1A1/PLEK/TFPI2/GP1BA/FERMT3/APOE/LCK/JAK2/IL6/GNA14	43
GO_MEMBRANE_INVAGINATION	GO_MEMBRANE_INVAGINATION	23/1098	134/18046	5.7235e-06	0.000138949	0.00010442	SYT11/STAP1/FCGR2B/ARHGAP25/NCKAP1L/ELMO1/RAB31/ABCA1/MSR1/BIN2/AIF1/RAC2/IGHV1OR15-1/TREM2/ITGB2/C3/TRBC2/IGHG4/ITGAM/FCGR1A/IGHV1-69-2/IGHV3-20/MEGF10	23
GO_SARCOLEMMA	GO_SARCOLEMMA	23/1098	134/18046	5.7235e-06	0.000138949	0.00010442	SGCD/SYNC/SLC8A1/FLNC/ATP2B4/AKAP6/SYNM/SSPN/CACNA2D1/SLMAP/NOS1/VCAM1/VCL/BGN/COL6A3/SGCB/AHNAK2/SLC2A5/STAC/AQP1/DYSF/KCND3/CAV2	23
GO_INTERLEUKIN_12_PRODUCTION	GO_INTERLEUKIN_12_PRODUCTION	14/1098	57/18046	5.73592e-06	0.000138949	0.00010442	CCL19/SCIMP/TLR9/CCR7/CD40LG/TLR4/JAK3/LTB/CMKLR1/LILRB1/IL12B/TIGIT/TLR8/IDO1	14
GO_VASCULAR_PROCESS_IN_CIRCULATORY_SYSTEM	GO_VASCULAR_PROCESS_IN_CIRCULATORY_SYSTEM	27/1098	173/18046	5.92263e-06	0.000142804	0.000107318	HTR2A/SLC8A1/KCNMA1/PRKG1/TACR2/ITGA1/EDNRA/PDE3A/NPPC/GJA5/NOS1/UTS2B/F2R/AGTR2/RAMP2/TGFB1/CDH5/DRD5/GJA1/HTR2B/APOE/ADORA1/AGT/CD38/FOXC2/KEL/UTS2	27
GO_C_C_CHEMOKINE_BINDING	GO_C_C_CHEMOKINE_BINDING	9/1098	24/18046	6.28799e-06	0.000148844	0.000111857	CX3CR1/CCR7/CXCR4/CCR4/CCR5/CCR1/CXCR5/CXCR3/CCR9	9
GO_IMMUNOGLOBULIN_BINDING	GO_IMMUNOGLOBULIN_BINDING	9/1098	24/18046	6.28799e-06	0.000148844	0.000111857	FCER1A/CD22/MS4A1/FCGR2B/FCER2/CD4/FCGR2A/FCGR3A/FCGR1A	9
GO_POSITIVE_REGULATION_OF_ANTIGEN_RECEPTOR_MEDIATED_SIGNALING_PATHWAY	GO_POSITIVE_REGULATION_OF_ANTIGEN_RECEPTOR_MEDIATED_SIGNALING_PATHWAY	9/1098	24/18046	6.28799e-06	0.000148844	0.000111857	PRKCB/STAP1/TESPA1/PTPRC/CCR7/CMTM3/TRAT1/NFAM1/LCK	9
GO_REGULATION_OF_BONE_DEVELOPMENT	GO_REGULATION_OF_BONE_DEVELOPMENT	9/1098	24/18046	6.28799e-06	0.000148844	0.000111857	GLI3/FBN1/GREM1/TMEM119/NOTCH2/LOX/TYROBP/LILRB1/SLC9B2	9
GO_REGULATION_OF_NATURAL_KILLER_CELL_MEDIATED_IMMUNITY	GO_REGULATION_OF_NATURAL_KILLER_CELL_MEDIATED_IMMUNITY	12/1098	43/18046	6.39333e-06	0.00015065	0.000113214	VAV1/SLAMF6/SH2D1A/NCR3/LILRB1/IL12B/HAVCR2/CD96/IL21/CRTAM/RASGRP1/CLNK	12
GO_REGULATION_OF_ION_TRANSMEMBRANE_TRANSPORT	GO_REGULATION_OF_ION_TRANSMEMBRANE_TRANSPORT	55/1098	486/18046	6.53603e-06	0.000152939	0.000114934	MEF2C/FLNA/SLC8A1/KCNMA1/ATP2B4/HVCN1/AKAP6/RGS4/CD19/PIK3CG/PLCG2/CORO1A/CLIC2/TLR9/KCNIP1/THY1/CACNA2D1/KCNA1/SLMAP/PRNP/KCNK12/REM1/EHD3/SHISA8/GJA5/NOS1/CALHM1/FXYD2/F2R/P2RX7/GRIN2A/CCL2/RELN/STAC/PDE4B/TREM2/DYSF/LRRC55/CYBB/HAMP/KCNA3/APLNR/CNIH2/CATSPER1/KCND2/AGT/KCND3/KCNK13/TWIST1/KCNC2/RASGRF1/KEL/KCNK4/SHANK1/KCNA6	55
GO_CARDIOCYTE_DIFFERENTIATION	GO_CARDIOCYTE_DIFFERENTIATION	26/1098	164/18046	6.54946e-06	0.000152939	0.000114934	SGCD/MEF2C/IGF1/SLC8A1/PRICKLE1/MYH11/AKAP6/RGS4/GREM1/VCAM1/NKX2-5/FHOD3/SGCB/AGTR2/TENM4/PDGFRB/TGFB1/NOX4/HAMP/TGFB2/EOMES/SEMA3C/MYH10/WT1/AGT/TWIST1	26
GO_DIVALENT_INORGANIC_CATION_TRANSPORT	GO_DIVALENT_INORGANIC_CATION_TRANSPORT	56/1098	499/18046	6.93494e-06	0.000161214	0.000121153	MYLK/HTR2A/SLC8A1/PRKCB/ATP2B4/BCL2/AKAP6/CYSLTR1/RGS4/CD19/MS4A1/FCRL3/PIK3CG/CCL19/PLCG2/CORO1A/NCS1/CLIC2/TLR9/P2RY12/THY1/CACNA2D1/PRNP/PTPRC/REM1/EHD3/NOS1/CALHM1/SLC24A3/CCR7/F2R/P2RX7/GRIN2A/CXCR4/RAMP2/CCL2/CD84/CCL21/CD4/STAC/PDE4B/PDGFRB/CCR5/DYSF/GJA1/LILRB1/CALCRL/APLNR/IL1RAPL1/CCR1/HTR2B/LCK/CATSPER1/AGT/CCL5/GCG	56
GO_IMMUNOLOGICAL_SYNAPSE_FORMATION	GO_IMMUNOLOGICAL_SYNAPSE_FORMATION	7/1098	14/18046	7.11903e-06	0.000164755	0.000123814	MSN/CCL19/CCR7/DOCK8/CCL21/CD6/HAVCR2	7
GO_CD4_POSITIVE_ALPHA_BETA_T_CELL_DIFFERENTIATION	GO_CD4_POSITIVE_ALPHA_BETA_T_CELL_DIFFERENTIATION	16/1098	74/18046	7.47959e-06	0.00017233	0.000129506	CCL19/NCKAP1L/SASH3/GPR183/GATA3/SLAMF6/SPN/JAK3/CD83/IL12B/CD86/PLA2G2D/IL12RB1/NLRP3/SOCS1/IL6	16
GO_CRANIAL_SKELETAL_SYSTEM_DEVELOPMENT	GO_CRANIAL_SKELETAL_SYSTEM_DEVELOPMENT	15/1098	66/18046	7.51779e-06	0.000172443	0.000129592	MEF2C/GLI3/RAB23/CHST11/SH3PXD2B/PRRX1/PAX5/WNT9B/MMP16/SIX2/TGFB2/FREM1/TIFAB/TWIST1/FOXC2	15
GO_DETECTION_OF_EXTERNAL_BIOTIC_STIMULUS	GO_DETECTION_OF_EXTERNAL_BIOTIC_STIMULUS	8/1098	19/18046	7.56716e-06	0.000172811	0.000129868	SSC5D/TLR6/C4B/TLR1/LY96/TLR4/TREM2/NLRC4	8
GO_PEPTIDYL_TYROSINE_MODIFICATION	GO_PEPTIDYL_TYROSINE_MODIFICATION	45/1098	372/18046	8.33099e-06	0.00018942	0.00014235	IGF1/IL31RA/HTR2A/FGF7/STAP1/AXL/THBS4/EPHA3/GREM1/THY1/SFRP2/PRNP/PTPRC/CNTN1/ITGB3/BANK1/PECAM1/RELN/NRP1/CD4/PDGFRB/TGFB1/JAK3/NCF1/CD44/TREM2/ITGB2/NOX4/IL12B/BST1/SAMSN1/CASS4/CD3E/LCK/IL21/ADORA1/AGT/JAK2/CCL5/SOCS1/IL5/CD74/FCGR1A/IL6/TNFSF18	45
GO_REGULATION_OF_MUSCLE_SYSTEM_PROCESS	GO_REGULATION_OF_MUSCLE_SYSTEM_PROCESS	35/1098	260/18046	8.40642e-06	0.000190301	0.000143012	IGF1/FLNA/PPP1R12B/SLC8A1/CNN1/KCNMA1/HSPB6/ATP2B4/PRKG1/AKAP6/RGS4/CHRNA3/TACR2/PIK3CG/TACR1/CLIC2/FBXO32/CTNNA3/KCNA1/EHD3/SPX/GJA5/NOS1/MYBPH/NKX2-5/PDE5A/F2R/AIF1/PDE4B/CHRNB4/HAMP/CALCRL/ADORA1/AGT/TIFAB	35
GO_MHC_CLASS_II_RECEPTOR_ACTIVITY	GO_MHC_CLASS_II_RECEPTOR_ACTIVITY	6/1098	10/18046	8.5029e-06	0.000191648	0.000144024	HLA-DQA2/HLA-DQB2/HLA-DRA/HLA-DOA/HLA-DPA1/HLA-DQA1	6
GO_REGULATION_OF_ALPHA_BETA_T_CELL_ACTIVATION	GO_REGULATION_OF_ALPHA_BETA_T_CELL_ACTIVATION	18/1098	92/18046	9.11774e-06	0.000203734	0.000153107	GLI3/CCL19/NCKAP1L/SASH3/PTPRC/EBI3/CD28/GATA3/JAK3/CD83/LILRB1/IL12B/CD86/CD3E/IL12RB1/CD274/NLRP3/SOCS1	18
GO_REGULATION_OF_BMP_SIGNALING_PATHWAY	GO_REGULATION_OF_BMP_SIGNALING_PATHWAY	18/1098	92/18046	9.11774e-06	0.000203734	0.000153107	FSTL1/FBN1/GREM1/RNF165/ZNF423/SFRP2/SFRP4/HTRA1/NOTCH2/ENG/HTRA3/CDH5/FZD1/SULF1/CRB2/DAND5/GDF5/GDF3	18
GO_MATURE_B_CELL_DIFFERENTIATION	GO_MATURE_B_CELL_DIFFERENTIATION	9/1098	25/18046	9.29565e-06	0.000206818	0.000155424	POU2F2/CD19/FCGR2B/PLCG2/LGALS1/GPR183/DOCK10/DOCK11/NOTCH2	9
GO_NEPHRON_EPITHELIUM_DEVELOPMENT	GO_NEPHRON_EPITHELIUM_DEVELOPMENT	20/1098	110/18046	9.45506e-06	0.000209466	0.000157414	MEF2C/GLI3/BCL2/FAT4/FGF1/ADAMTS16/WWTR1/GREM1/BASP1/PECAM1/HEYL/GATA3/NOTCH2/AGTR2/WNT9B/SIX2/WT1/AGT/IRX1/FOXC2	20
GO_CELL_KILLING	GO_CELL_KILLING	26/1098	168/18046	1.02241e-05	0.00022554	0.000169494	CD1C/STAP1/FCGR2B/CORO1A/ELANE/FCER2/VAV1/PTPRC/CD1E/P2RX7/SLAMF6/TYROBP/SH2D1A/NCR3/HAMP/C3/CCL13/LILRB1/IL12B/HAVCR2/IL12RB1/IL21/CRTAM/RASGRP1/ITGAM/KIR3DL1	26
GO_LEUKOCYTE_ADHESION_TO_VASCULAR_ENDOTHELIAL_CELL	GO_LEUKOCYTE_ADHESION_TO_VASCULAR_ENDOTHELIAL_CELL	12/1098	45/18046	1.07054e-05	0.000234993	0.000176598	SELP/ELANE/CX3CR1/SELL/VCAM1/ETS1/SPN/CCL21/ITGA4/ADD2/ITGB2/SELPLG	12
GO_ENDOCYTIC_VESICLE	GO_ENDOCYTIC_VESICLE	38/1098	296/18046	1.07433e-05	0.000234993	0.000176598	RAB23/PLD4/SYT11/VIM/HVCN1/TLR6/WAS/CORO1A/ELANE/RAB31/MPEG1/SCIMP/TLR7/TLR9/FMNL1/EHD3/RAB8B/TLR1/ABCA1/MSR1/SPARC/CD207/RAC2/NCF1/DYSF/CYBB/HLA-DQA2/TYRP1/HP/HLA-DQB2/APOE/HLA-DPB1/HLA-DRA/CD74/FCGR1A/HLA-DPA1/CPNE6/HLA-DQA1	38
GO_POSITIVE_REGULATION_OF_INFLAMMATORY_RESPONSE	GO_POSITIVE_REGULATION_OF_INFLAMMATORY_RESPONSE	24/1098	150/18046	1.25066e-05	0.000272412	0.000204718	STAP1/TLR10/TLR6/PIK3CG/TLR7/TLR9/TAC1/SUCNR1/GPSM3/ETS1/CD28/CCR7/LTA/CD6/TLR4/TREM2/C3/IL12B/IL21/AGT/JAK2/IL6/GBP5/IDO1	24
GO_NEGATIVE_REGULATION_OF_LEUKOCYTE_CELL_CELL_ADHESION	GO_NEGATIVE_REGULATION_OF_LEUKOCYTE_CELL_CELL_ADHESION	22/1098	131/18046	1.30026e-05	0.000282031	0.000211947	GLI3/DTX1/FCGR2B/FGL2/PRNP/TNFAIP8L2/PDE5A/SPN/CCL21/GPNMB/JAK3/PDCD1LG2/LILRB1/CD86/HAVCR2/TIGIT/LAX1/PLA2G2D/CD274/SOCS1/CD74/IDO1	22
GO_POSITIVE_REGULATION_OF_ALPHA_BETA_T_CELL_ACTIVATION	GO_POSITIVE_REGULATION_OF_ALPHA_BETA_T_CELL_ACTIVATION	14/1098	61/18046	1.33573e-05	0.000288517	0.000216821	GLI3/CCL19/NCKAP1L/SASH3/PTPRC/EBI3/CD28/CD83/IL12B/CD86/CD3E/IL12RB1/NLRP3/SOCS1	14
GO_POSITIVE_REGULATION_OF_CYTOKINE_SECRETION	GO_POSITIVE_REGULATION_OF_CYTOKINE_SECRETION	23/1098	141/18046	1.36458e-05	0.000293526	0.000220585	CCL19/TLR1/CLEC9A/F2R/AIF1/GATA3/P2RX7/AGTR2/TLR4/TRIM6/CRLF2/CD14/HAVCR2/POSTN/CD2/HTR2B/CRTAM/CD274/RASGRP1/NLRP3/TWIST1/TLR8/AIM2	23
GO_REGULATION_OF_CYTOKINE_PRODUCTION_INVOLVED_IN_IMMUNE_RESPONSE	GO_REGULATION_OF_CYTOKINE_PRODUCTION_INVOLVED_IN_IMMUNE_RESPONSE	17/1098	86/18046	1.39284e-05	0.000298368	0.000224224	SASH3/SCIMP/GATA3/TGFB1/TLR4/JAK3/TRIM6/LILRB1/TGFB2/SEMA7A/TRIL/CD96/NLRP3/CD74/CLNK/IL6/CLC	17
GO_INFLAMMATORY_RESPONSE_TO_ANTIGENIC_STIMULUS	GO_INFLAMMATORY_RESPONSE_TO_ANTIGENIC_STIMULUS	13/1098	54/18046	1.5583e-05	0.000332438	0.000249828	IL31RA/CYSLTR1/FCGR2B/ELANE/CD28/CCR7/GATA3/LTA/NOTCH2/CD6/C3/IL12B/RASGRP1	13
GO_REGULATION_OF_MUSCLE_CONTRACTION	GO_REGULATION_OF_MUSCLE_CONTRACTION	26/1098	172/18046	1.56879e-05	0.000333304	0.000250479	FLNA/PPP1R12B/SLC8A1/CNN1/KCNMA1/HSPB6/PRKG1/CHRNA3/TACR2/PIK3CG/TACR1/CLIC2/CTNNA3/KCNA1/EHD3/SPX/GJA5/NOS1/MYBPH/NKX2-5/PDE5A/F2R/PDE4B/CHRNB4/CALCRL/ADORA1	26
GO_CYTOKINE_PRODUCTION_INVOLVED_IN_IMMUNE_RESPONSE	GO_CYTOKINE_PRODUCTION_INVOLVED_IN_IMMUNE_RESPONSE	19/1098	105/18046	1.68411e-05	0.000354896	0.000266705	IL31RA/SASH3/SCIMP/GATA3/TGFB1/TLR4/JAK3/TRIM6/LILRB1/IL12B/TGFB2/SEMA7A/TRIL/CD96/NLRP3/CD74/CLNK/IL6/CLC	19
GO_POSITIVE_REGULATION_OF_ADAPTIVE_IMMUNE_RESPONSE	GO_POSITIVE_REGULATION_OF_ADAPTIVE_IMMUNE_RESPONSE	19/1098	105/18046	1.68411e-05	0.000354896	0.000266705	CD1C/CCL19/SASH3/FCER2/PTPRC/CD1E/CD28/GATA3/P2RX7/LTA/CD4/TNFSF13B/TGFB1/C3/IL12B/IL12RB1/CD274/NLRP3/IL6	19
GO_LIPOPOLYSACCHARIDE_BINDING	GO_LIPOPOLYSACCHARIDE_BINDING	10/1098	33/18046	1.70391e-05	0.000357614	0.000268748	SELP/LY96/P2RX7/CD6/TLR4/TREM2/BPI/CD14/TRIL/RNASE3	10
GO_NEPHRON_DEVELOPMENT	GO_NEPHRON_DEVELOPMENT	23/1098	143/18046	1.72717e-05	0.000359584	0.000270228	MEF2C/GLI3/BCL2/FAT4/FGF1/ADAMTS16/WWTR1/GREM1/BASP1/PECAM1/HEYL/GATA3/NOTCH2/AGTR2/WNT9B/PDGFRB/SIX2/SULF1/WT1/AGT/ENPEP/IRX1/FOXC2	23
GO_REGULATION_OF_TUBE_SIZE	GO_REGULATION_OF_TUBE_SIZE	23/1098	143/18046	1.72717e-05	0.000359584	0.000270228	HTR2A/SLC8A1/KCNMA1/PRKG1/ITGA1/EDNRA/NPPC/GJA5/NOS1/UTS2B/F2R/AGTR2/WNT9B/DRD5/GJA1/HTR2B/APOE/ADORA1/AGT/CD38/FOXC2/KEL/UTS2	23
GO_CLATHRIN_COATED_ENDOCYTIC_VESICLE_MEMBRANE	GO_CLATHRIN_COATED_ENDOCYTIC_VESICLE_MEMBRANE	11/1098	40/18046	1.81174e-05	0.000374185	0.000281201	CD207/HLA-DQA2/TYRP1/HLA-DQB2/APOE/HLA-DPB1/HLA-DRA/CD74/FCGR1A/HLA-DPA1/HLA-DQA1	11
GO_REGULATION_OF_MACROPHAGE_MIGRATION	GO_REGULATION_OF_MACROPHAGE_MIGRATION	11/1098	40/18046	1.81174e-05	0.000374185	0.000281201	STAP1/CX3CR1/P2RY12/CD200/C5AR1/C3AR1/CD200R1/TREM2/CMKLR1/CCL5/CYP19A1	11
GO_COMPLEX_OF_COLLAGEN_TRIMERS	GO_COMPLEX_OF_COLLAGEN_TRIMERS	8/1098	21/18046	1.82598e-05	0.000375631	0.000282288	LUM/COL8A1/COL3A1/COL5A1/COL1A2/COL1A1/COL4A2/COL5A2	8
GO_CELL_MATRIX_ADHESION	GO_CELL_MATRIX_ADHESION	31/1098	226/18046	1.86264e-05	0.000381657	0.000286816	ECM2/BCL2/ITGA1/EPHA3/GREM1/THY1/TNN/COL3A1/PLEKHA2/ACTN1/ITGBL1/VCAM1/VCL/ITGB3/PECAM1/CCR7/CCL21/NRP1/ITGA4/ITGAL/CD44/FN1/ITGB2/OTOA/POSTN/BST1/FREM1/CD3E/CD96/ITGA11/TIAM1	31
GO_FIBRONECTIN_BINDING	GO_FIBRONECTIN_BINDING	9/1098	27/18046	1.90914e-05	0.000389645	0.000292819	CCDC80/SSC5D/SFRP2/PLEKHA2/CTSK/ITGB3/ITGA4/CTSL/LRRC15	9
GO_RESPONSE_TO_TRANSFORMING_GROWTH_FACTOR_BETA	GO_RESPONSE_TO_TRANSFORMING_GROWTH_FACTOR_BETA	33/1098	248/18046	1.92012e-05	0.00039035	0.000293349	MEF2C/ZEB1/ASPN/LTBP1/FBN1/PENK/CX3CR1/PDE3A/COL3A1/CHST11/NRROS/LDLRAD4/LTBP2/HTRA1/LOX/DKK3/ENG/NREP/COL1A2/DAB2/HTRA3/TGFB1/COL1A1/CDH5/LEFTY2/NOX4/COL4A2/TGFB2/POSTN/DAND5/CD109/GDF5/CAV2	33
GO_ANCHORED_COMPONENT_OF_PLASMA_MEMBRANE	GO_ANCHORED_COMPONENT_OF_PLASMA_MEMBRANE	13/1098	55/18046	1.92803e-05	0.000390426	0.000293406	GPC6/THY1/FOLR2/IGSF21/PRNP/CNTN1/RGS7BP/NTNG2/PRND/CD14/GP1BA/CD2/GPC5	13
GO_NEGATIVE_REGULATION_OF_CHEMOTAXIS	GO_NEGATIVE_REGULATION_OF_CHEMOTAXIS	14/1098	63/18046	1.97924e-05	0.000399236	0.000300027	STAP1/GREM1/ELANE/GPR18/ROBO1/AIF1/CXCL13/CCL2/NRP1/SEMA6B/SEMA3C/SEMA7A/CYP19A1/SEMA3A	14
GO_ENDOPEPTIDASE_REGULATOR_ACTIVITY	GO_ENDOPEPTIDASE_REGULATOR_ACTIVITY	27/1098	185/18046	2.07771e-05	0.000417474	0.000313733	SERPINA9/A2M/TIMP2/SFRP2/C4A/PRNP/CD27/C4B/SPOCK1/COL6A3/CRIM1/TIMP1/SERPINA6/SPOCK2/LXN/SERPINE2/C3/TFPI2/CST6/CRB2/CST4/CD109/AGT/CST2/CST5/CST7/BIRC7	27
GO_ANTIGEN_BINDING	GO_ANTIGEN_BINDING	24/1098	155/18046	2.19348e-05	0.000439035	0.000329936	CD1C/CD1E/CD48/LILRA1/ITGA4/IGHV1OR15-1/TGFB1/TRBC2/TRAV8-4/TRAV29DV5/TRGV3/TRBV7-9/CD209/HLA-DPB1/HLA-DRA/IGHG4/LILRB4/TRBV12-3/TRAV19/HLA-DPA1/IGHV1-69-2/HLA-DQA1/IGHV3-20/IGKV4-1	24
GO_MONONUCLEAR_CELL_MIGRATION	GO_MONONUCLEAR_CELL_MIGRATION	17/1098	89/18046	2.23169e-05	0.000444965	0.000334393	CCL19/GREM1/PECAM1/AIF1/C5AR1/CCL2/CCL21/C3AR1/CMKLR1/CCL13/CCR1/CCL26/CCL22/CCL5/CCL17/IL6/XCL2	17
GO_NEGATIVE_REGULATION_OF_DEFENSE_RESPONSE	GO_NEGATIVE_REGULATION_OF_DEFENSE_RESPONSE	33/1098	250/18046	2.26751e-05	0.000450375	0.000338458	IGF1/SYT11/PTGIS/CNR2/A2M/FCGR2B/FGL2/ELANE/SIGLEC10/PTPRC/CD200/ABCD2/NLRC3/ETS1/TNFAIP8L2/CR1/HTRA1/GATA3/IFI16/CD200R1/CDH5/LILRB1/IL12B/CALCRL/HAVCR2/DUSP10/APOE/CD96/ADORA1/NLRP3/TNFAIP6/CST7/CYP19A1	33
GO_PROTEIN_COMPLEX_INVOLVED_IN_CELL_ADHESION	GO_PROTEIN_COMPLEX_INVOLVED_IN_CELL_ADHESION	10/1098	34/18046	2.28296e-05	0.000451712	0.000339462	ITGA1/ITGBL1/ITGB3/CD28/ITGAD/ITGA4/ITGAL/ITGB2/ITGA11/ITGAM	10
GO_CELL_DIFFERENTIATION_INVOLVED_IN_KIDNEY_DEVELOPMENT	GO_CELL_DIFFERENTIATION_INVOLVED_IN_KIDNEY_DEVELOPMENT	13/1098	56/18046	2.37241e-05	0.000467627	0.000351423	MEF2C/GLI3/FAT4/WWTR1/GREM1/BASP1/GATA3/NOTCH2/WNT9B/SIX2/GLIS2/WT1/FOXC2	13
GO_NATURAL_KILLER_CELL_MEDIATED_IMMUNITY	GO_NATURAL_KILLER_CELL_MEDIATED_IMMUNITY	14/1098	64/18046	2.39311e-05	0.000469919	0.000353146	CORO1A/VAV1/SLAMF6/SH2D1A/NCR3/LILRB1/IL12B/HAVCR2/CD96/IL21/CRTAM/RASGRP1/CLNK/KIR3DL1	14
GO_ANCHORED_COMPONENT_OF_MEMBRANE	GO_ANCHORED_COMPONENT_OF_MEMBRANE	25/1098	166/18046	2.42111e-05	0.000473624	0.00035593	LSAMP/CD52/GPC6/THY1/FOLR2/IGSF21/PRNP/CD48/CNTN1/RGS7BP/NTNG2/LYPD8/PRND/OTOA/CD14/ART4/GP1BA/BST1/CD2/SEMA7A/CD109/NTM/LYPD1/SYN1/GPC5	25
GO_NEGATIVE_REGULATION_OF_ANTIGEN_RECEPTOR_MEDIATED_SIGNALING_PATHWAY	GO_NEGATIVE_REGULATION_OF_ANTIGEN_RECEPTOR_MEDIATED_SIGNALING_PATHWAY	9/1098	28/18046	2.66217e-05	0.000514952	0.000386988	CD22/FCGR2B/LPXN/FCRL3/THY1/PVRIG/PRNP/UBASH3A/LILRB4	9
GO_REGULATION_OF_INTERLEUKIN_4_PRODUCTION	GO_REGULATION_OF_INTERLEUKIN_4_PRODUCTION	9/1098	28/18046	2.66217e-05	0.000514952	0.000386988	SASH3/CD28/GATA3/CD40LG/CD83/CD86/HAVCR2/CD3E/NLRP3	9
GO_T_CELL_CHEMOTAXIS	GO_T_CELL_CHEMOTAXIS	9/1098	28/18046	2.66217e-05	0.000514952	0.000386988	PIK3CG/GPR183/PIK3CD/CXCL13/CCL21/CCL26/CCL5/CXCR3/XCL2	9
GO_CALCIUM_ION_TRANSMEMBRANE_IMPORT_INTO_CYTOSOL	GO_CALCIUM_ION_TRANSMEMBRANE_IMPORT_INTO_CYTOSOL	23/1098	147/18046	2.72389e-05	0.000524028	0.000393808	HTR2A/SLC8A1/ATP2B4/AKAP6/CD19/CCL19/PLCG2/CORO1A/CLIC2/THY1/CACNA2D1/PRNP/PTPRC/NOS1/CCR7/F2R/P2RX7/GRIN2A/CCL21/CCR5/APLNR/HTR2B/LCK	23
GO_SUPEROXIDE_METABOLIC_PROCESS	GO_SUPEROXIDE_METABOLIC_PROCESS	15/1098	73/18046	2.72931e-05	0.000524028	0.000393808	NRROS/SOD3/NCF1B/SH3PXD2B/NCF1C/TGFB1/TYROBP/MAPT/NCF1/ITGB2/NOX4/CYBB/BST1/AGT/ITGAM	15
GO_SULFUR_COMPOUND_BINDING	GO_SULFUR_COMPOUND_BINDING	33/1098	253/18046	2.89686e-05	0.000553446	0.000415916	CCDC80/DPYSL3/FSTL1/FGF7/ECM2/THBS4/FGF1/PCOLCE/FBN1/NRP2/SELP/ELANE/PRNP/PTPRC/SELL/SOD3/LTBP2/CXCL13/GAL3ST4/COL5A1/NRP1/GPNMB/FN1/LXN/SERPINE2/POSTN/THBS2/APOE/PLA2G2D/CHST15/NELL1/NDNF/MMP7	33
GO_EXTRACELLULAR_MATRIX_BINDING	GO_EXTRACELLULAR_MATRIX_BINDING	13/1098	57/18046	2.90388e-05	0.000553446	0.000415916	SSC5D/LGALS1/PLEKHA2/FBLN2/BGN/SPOCK1/ITGB3/SPARC/CD248/SPOCK2/TGFBI/SPP1/LRRC15	13
GO_T_CELL_MEDIATED_IMMUNITY	GO_T_CELL_MEDIATED_IMMUNITY	18/1098	100/18046	3.00071e-05	0.000569805	0.00042821	IL31RA/RFTN1/CD1C/WAS/FCGR2B/SASH3/MYO1G/PTPRC/CD1E/GATA3/P2RX7/LILRB1/IL12B/IL12RB1/CD70/NLRP3/IL6/CLC	18
GO_BONE_REMODELING	GO_BONE_REMODELING	17/1098	91/18046	3.01588e-05	0.000570595	0.000428804	RASSF2/GREM1/CTSK/TMEM119/ITGB3/RAC2/P2RX7/NOTCH2/TGFB1/NOX4/GJA1/INPP5D/GDF5/CTHRC1/SPP1/CD38/IL6	17
GO_REGULATION_OF_MYELOID_LEUKOCYTE_DIFFERENTIATION	GO_REGULATION_OF_MYELOID_LEUKOCYTE_DIFFERENTIATION	20/1098	119/18046	3.13685e-05	0.000591326	0.000444383	RASSF2/FBN1/EVI2B/MAFB/NOTCH2/CD4/TGFB1/TYROBP/TLR4/TREM2/LILRB1/IL12B/C1QC/CCR1/INPP5D/IL34/LILRB4/SLC9B2/IL5/CD74	20
GO_PLASMA_MEMBRANE_RAFT	GO_PLASMA_MEMBRANE_RAFT	19/1098	110/18046	3.32011e-05	0.000618892	0.000465099	HTR2A/KCNMA1/ATP2B4/PTGIS/AKAP6/CHRNA3/MS4A1/P2RY12/EHD2/NOS1/F2R/ADD2/ITGB2/SELPLG/KCND2/JAK2/ITGAM/CAV2/MLC1	19
GO_REGULATION_OF_CATION_TRANSMEMBRANE_TRANSPORT	GO_REGULATION_OF_CATION_TRANSMEMBRANE_TRANSPORT	41/1098	346/18046	3.36221e-05	0.000618892	0.000465099	MEF2C/FLNA/SLC8A1/ATP2B4/AKAP6/RGS4/CD19/PIK3CG/PLCG2/CORO1A/CLIC2/TLR9/KCNIP1/THY1/CACNA2D1/KCNA1/SLMAP/PRNP/REM1/EHD3/SHISA8/NOS1/FXYD2/F2R/GRIN2A/CCL2/RELN/STAC/PDE4B/TREM2/DYSF/LRRC55/HAMP/APLNR/CNIH2/AGT/TWIST1/KCNC2/RASGRF1/KEL/SHANK1	41
GO_DENDRITIC_CELL_ANTIGEN_PROCESSING_AND_PRESENTATION	GO_DENDRITIC_CELL_ANTIGEN_PROCESSING_AND_PRESENTATION	6/1098	12/18046	3.36496e-05	0.000618892	0.000465099	FCGR2B/CCL19/FGL2/CCR7/CCL21/CD74	6
GO_FIBRILLAR_COLLAGEN_TRIMER	GO_FIBRILLAR_COLLAGEN_TRIMER	6/1098	12/18046	3.36496e-05	0.000618892	0.000465099	LUM/COL3A1/COL5A1/COL1A2/COL1A1/COL5A2	6
GO_POSITIVE_REGULATION_OF_INTERFERON_GAMMA_BIOSYNTHETIC_PROCESS	GO_POSITIVE_REGULATION_OF_INTERFERON_GAMMA_BIOSYNTHETIC_PROCESS	6/1098	12/18046	3.36496e-05	0.000618892	0.000465099	TLR7/TLR9/EBI3/IL12B/IL21/TLR8	6
GO_POSITIVE_REGULATION_OF_INTERLEUKIN_8_BIOSYNTHETIC_PROCESS	GO_POSITIVE_REGULATION_OF_INTERLEUKIN_8_BIOSYNTHETIC_PROCESS	6/1098	12/18046	3.36496e-05	0.000618892	0.000465099	ELANE/TLR7/TLR9/TLR4/TLR8/CD74	6
GO_PEPTIDASE_REGULATOR_ACTIVITY	GO_PEPTIDASE_REGULATOR_ACTIVITY	30/1098	222/18046	3.36666e-05	0.000618892	0.000465099	SERPINA9/A2M/PCOLCE/TIMP2/SFRP2/C4A/PRNP/CD27/C4B/SPOCK1/COL6A3/CRIM1/TIMP1/SERPINA6/SPOCK2/FN1/LXN/SERPINE2/C3/TFPI2/PI15/CST6/CRB2/CST4/CD109/AGT/CST2/CST5/CST7/BIRC7	30
GO_INTERFERON_GAMMA_BIOSYNTHETIC_PROCESS	GO_INTERFERON_GAMMA_BIOSYNTHETIC_PROCESS	7/1098	17/18046	3.43095e-05	0.00062189	0.000467352	TLR7/TLR9/EBI3/LILRB1/IL12B/IL21/TLR8	7
GO_NEGATIVE_REGULATION_OF_MACROPHAGE_ACTIVATION	GO_NEGATIVE_REGULATION_OF_MACROPHAGE_ACTIVATION	7/1098	17/18046	3.43095e-05	0.00062189	0.000467352	IL31RA/SYT11/FCGR2B/PTPRC/CD200/BPI/CST7	7
GO_OXIDOREDUCTASE_ACTIVITY_ACTING_ON_NAD_P_H_OXYGEN_AS_ACCEPTOR	GO_OXIDOREDUCTASE_ACTIVITY_ACTING_ON_NAD_P_H_OXYGEN_AS_ACCEPTOR	7/1098	17/18046	3.43095e-05	0.00062189	0.000467352	NCF1B/NCF1C/MICAL2/NCF1/NOX4/CYBB/KMO	7
GO_PLATELET_ALPHA_GRANULE_MEMBRANE	GO_PLATELET_ALPHA_GRANULE_MEMBRANE	7/1098	17/18046	3.43095e-05	0.00062189	0.000467352	SELP/ITGB3/LHFPL2/PECAM1/SPARC/PCDH7/CD109	7
GO_CD4_POSITIVE_ALPHA_BETA_T_CELL_ACTIVATION	GO_CD4_POSITIVE_ALPHA_BETA_T_CELL_ACTIVATION	17/1098	92/18046	3.49281e-05	0.000630896	0.00047412	CCL19/NCKAP1L/SASH3/GPR183/GATA3/SLAMF6/SPN/JAK3/CD83/IL12B/CD86/PLA2G2D/IL12RB1/CD274/NLRP3/SOCS1/IL6	17
GO_NEURON_SPINE	GO_NEURON_SPINE	25/1098	170/18046	3.6453e-05	0.000655211	0.000492393	SLC8A1/SYT11/MAP1B/ZNF804A/FCGR2B/NGFR/DGKI/SORCS2/NOS1/DOCK10/SYNDIG1/GRIN2A/PDE4B/MAPT/LZTS1/CNIH2/MYH10/CD3E/ADORA1/RPH3A/KCND2/TIAM1/SEZ6/TENM2/SHANK1	25
GO_POSITIVE_REGULATION_OF_NATURAL_KILLER_CELL_MEDIATED_IMMUNITY	GO_POSITIVE_REGULATION_OF_NATURAL_KILLER_CELL_MEDIATED_IMMUNITY	9/1098	29/18046	3.6527e-05	0.000655211	0.000492393	VAV1/SLAMF6/SH2D1A/NCR3/IL12B/IL21/CRTAM/RASGRP1/CLNK	9
GO_IMMUNOGLOBULIN_PRODUCTION	GO_IMMUNOGLOBULIN_PRODUCTION	28/1098	202/18046	3.83778e-05	0.000686037	0.000515559	GAPT/VPREB3/POU2F2/CD22/FCGR2B/FCRL3/FGL2/SASH3/TLR9/PTPRC/SWAP70/CD28/CD40LG/TNFSF13B/TGFB1/TRAV9-2/TRAV2/TRAV14DV4/AICDA/LAX1/IGKV1-6/IL5/TRAV19/TRAV38-1/IGKV2D-30/IL6/IGKV2-29/IGKV4-1	28
GO_CD8_POSITIVE_ALPHA_BETA_T_CELL_ACTIVATION	GO_CD8_POSITIVE_ALPHA_BETA_T_CELL_ACTIVATION	8/1098	23/18046	3.94403e-05	0.000698039	0.000524578	BCL2/NCKAP1L/GPR18/TNFSF8/LILRB1/EOMES/CD274/SOCS1	8
GO_POSITIVE_REGULATION_OF_INTERLEUKIN_4_PRODUCTION	GO_POSITIVE_REGULATION_OF_INTERLEUKIN_4_PRODUCTION	8/1098	23/18046	3.94403e-05	0.000698039	0.000524578	SASH3/CD28/GATA3/CD40LG/CD86/HAVCR2/CD3E/NLRP3	8
GO_IMMUNOLOGICAL_SYNAPSE	GO_IMMUNOLOGICAL_SYNAPSE	10/1098	36/18046	3.95879e-05	0.000698039	0.000524578	CD37/CORO1A/SCIMP/RHOH/CD53/CD28/CD6/HAVCR2/CD3E/LCK	10
GO_POSITIVE_REGULATION_OF_INTERLEUKIN_10_PRODUCTION	GO_POSITIVE_REGULATION_OF_INTERLEUKIN_10_PRODUCTION	10/1098	36/18046	3.95879e-05	0.000698039	0.000524578	SASH3/TLR9/CD28/CD40LG/TLR4/TREM2/CD83/IL12B/TIGIT/CD274	10
GO_NEGATIVE_REGULATION_OF_LOCOMOTION	GO_NEGATIVE_REGULATION_OF_LOCOMOTION	45/1098	396/18046	4.01337e-05	0.000703027	0.000528327	MEF2C/DPYSL3/MEOX2/BCL2/PRKG1/STAP1/ARHGDIB/WAS/GREM1/ELANE/GPR18/CX3CR1/THY1/SFRP2/TNN/COL3A1/CD200/LDLRAD4/VCL/VASH1/ROBO1/AIF1/CXCL13/GATA3/AGTR2/CCL2/ENG/TIMP1/CCL21/NRP1/TGFB1/CD200R1/RRAS/SULF1/GJA1/SEMA6B/DUSP10/SEMA3C/SEMA7A/APOE/ADORA1/CD74/CYP19A1/SEMA3A/NRG3	45
GO_REGULATION_OF_SMALL_GTPASE_MEDIATED_SIGNAL_TRANSDUCTION	GO_REGULATION_OF_SMALL_GTPASE_MEDIATED_SIGNAL_TRANSDUCTION	40/1098	337/18046	4.01988e-05	0.000703027	0.000528327	IGF1/P2RY8/RHOJ/ARHGAP15/ARHGDIB/A2M/LPAR4/ARHGAP25/HEG1/GPR18/TIMP2/CDON/ARHGAP31/VAV1/COL3A1/RHOH/DGKI/ARHGAP30/GPR65/P2RY10/ABCA1/TAGAP/ROBO1/ARHGAP22/F2R/RAC2/NOTCH2/RELN/NRP1/PDGFRB/RASGRF2/SYDE2/TGFB2/CHN1/APOE/ARHGAP23/JAK2/RASGRP1/TIAM1/RASGRF1	40
GO_INTERLEUKIN_6_PRODUCTION	GO_INTERLEUKIN_6_PRODUCTION	25/1098	171/18046	4.02776e-05	0.000703027	0.000528327	SYT11/TLR6/NCKAP1L/SCIMP/TLR7/TLR9/CD200/TLR1/NLRC3/BANK1/F2R/AIF1/P2RX7/ZBTB20/TYROBP/TLR4/CD200R1/TREM2/BPI/HAVCR2/INPP5D/TWIST1/TLR8/CD74/IL6	25
GO_PHAGOCYTIC_VESICLE	GO_PHAGOCYTIC_VESICLE	21/1098	131/18046	4.1602e-05	0.000723707	0.000543867	RAB23/PLD4/SYT11/VIM/HVCN1/TLR6/WAS/CORO1A/ELANE/RAB31/MPEG1/SCIMP/TLR7/TLR9/FMNL1/RAB8B/TLR1/ABCA1/RAC2/NCF1/CYBB	21
GO_ORGAN_GROWTH	GO_ORGAN_GROWTH	28/1098	203/18046	4.19902e-05	0.000728018	0.000547107	BNC2/MEF2C/IGF1/COL14A1/FGF7/BCL2/AKAP6/RGS4/HEG1/SASH3/EVC/NPPC/BASP1/COL6A3/NKX2-5/AGTR2/TENM4/PDGFRB/HAMP/GJA1/TGFB2/WT1/AGT/COL12A1/NLGN4X/FOXC2/CYP19A1/MATN2	28
GO_BONE_MINERALIZATION	GO_BONE_MINERALIZATION	19/1098	112/18046	4.29804e-05	0.000742701	0.000558142	MGP/MEF2C/IGF1/SLC8A1/ASPN/OMD/GREM1/TMEM119/P2RX7/LOX/COL1A2/GPNMB/TGFB1/SRGN/PHOSPHO1/CCR1/TWIST1/NELL1/PHEX	19
GO_CYTOSOLIC_CALCIUM_ION_TRANSPORT	GO_CYTOSOLIC_CALCIUM_ION_TRANSPORT	26/1098	183/18046	4.69149e-05	0.00080532	0.0006052	HTR2A/SLC8A1/ATP2B4/BCL2/AKAP6/CD19/MS4A1/CCL19/PLCG2/CORO1A/CLIC2/THY1/CACNA2D1/PRNP/PTPRC/NOS1/CCR7/F2R/P2RX7/GRIN2A/CCL21/CD4/CCR5/APLNR/HTR2B/LCK	26
GO_MUSCLE_CELL_DEVELOPMENT	GO_MUSCLE_CELL_DEVELOPMENT	26/1098	183/18046	4.69149e-05	0.00080532	0.0006052	SGCD/MEF2C/IGF1/SLC8A1/FLNC/BCL2/MYH11/AKAP6/RGS4/NKX2-5/FHOD3/SGCB/LOX/AGTR2/RAMP2/ENG/PDGFRB/DYSF/HAMP/HDAC9/MYH10/AGT/CAV2/KEL/MEGF10/UCHL1	26
GO_CELLULAR_RESPONSE_TO_AMYLOID_BETA	GO_CELLULAR_RESPONSE_TO_AMYLOID_BETA	11/1098	44/18046	4.80222e-05	0.000821607	0.00061744	IGF1/TLR6/FCGR2B/CACNA2D1/PRNP/NGFR/VCAM1/ITGA4/TLR4/TREM2/GJA1	11
GO_NITRIC_OXIDE_MEDIATED_SIGNAL_TRANSDUCTION	GO_NITRIC_OXIDE_MEDIATED_SIGNAL_TRANSDUCTION	9/1098	30/18046	4.9379e-05	0.000836538	0.000628661	ATP2B4/NOS1/PDE5A/AGTR2/APOE/AGT/FPR1/KCNC2/NDNF	9
GO_POSITIVE_REGULATION_OF_CD4_POSITIVE_ALPHA_BETA_T_CELL_DIFFERENTIATION	GO_POSITIVE_REGULATION_OF_CD4_POSITIVE_ALPHA_BETA_T_CELL_DIFFERENTIATION	9/1098	30/18046	4.9379e-05	0.000836538	0.000628661	CCL19/NCKAP1L/SASH3/CD83/IL12B/CD86/IL12RB1/NLRP3/SOCS1	9
GO_POSITIVE_REGULATION_OF_RHO_PROTEIN_SIGNAL_TRANSDUCTION	GO_POSITIVE_REGULATION_OF_RHO_PROTEIN_SIGNAL_TRANSDUCTION	9/1098	30/18046	4.9379e-05	0.000836538	0.000628661	P2RY8/LPAR4/GPR18/COL3A1/GPR65/P2RY10/ROBO1/F2R/PDGFRB	9
GO_DENDRITIC_SHAFT	GO_DENDRITIC_SHAFT	10/1098	37/18046	5.13127e-05	0.000863652	0.000649037	HTR2A/FLNA/SLC8A1/MAP1A/ZNF804A/SYNDIG1/LZTS1/CNIH2/GRM7/SEZ6	10
GO_RESPIRATORY_BURST	GO_RESPIRATORY_BURST	10/1098	37/18046	5.13127e-05	0.000863652	0.000649037	CD52/PIK3CG/PIK3CD/NCF1B/RAC2/NCF1C/NCF1/CYBB/CAMK1D/DUSP10	10
GO_AMYLOID_BETA_BINDING	GO_AMYLOID_BETA_BINDING	15/1098	77/18046	5.2685e-05	0.00088103	0.000662096	BCHE/TLR6/FCGR2B/PRNP/NGFR/MSR1/GRIN2A/TLR4/TREM2/ITGB2/TGFB2/C1QA/APOE/CD74/ITGAM	15
GO_CARGO_RECEPTOR_ACTIVITY	GO_CARGO_RECEPTOR_ACTIVITY	15/1098	77/18046	5.2685e-05	0.00088103	0.000662096	PRG4/SSC5D/FOLR2/ABCA1/MSR1/DAB2/CD163L1/CD6/ITGB2/SCARF2/HHIPL1/MRC1/ITGAM/MEGF10/TMPRSS15	15
GO_AMEBOIDAL_TYPE_CELL_MIGRATION	GO_AMEBOIDAL_TYPE_CELL_MIGRATION	50/1098	462/18046	5.50244e-05	0.00091719	0.000689271	MEF2C/SLC8A1/FGF7/MEOX2/RHOJ/FGF1/ARHGDIB/PLCG2/GREM1/NRP2/ARSB/ADGRA2/P2RY12/VEGFC/AMOTL1/TAC1/ETS1/SRPX2/ITGB3/VASH1/ROBO1/PECAM1/SPARC/CXCL13/GATA3/AGTR2/TIMP1/NRP1/ITGA4/FAP/TGFB1/FN1/ITGB2/GJA1/SEMA6B/TGFB2/DUSP10/SEMA3C/SEMA7A/HDAC9/CRB2/HTR2B/APOE/AGT/TWIST1/SCG2/MIXL1/FOXC2/EGR3/SEMA3A	50
GO_POSITIVE_REGULATION_OF_NATURAL_KILLER_CELL_MEDIATED_CYTOTOXICITY	GO_POSITIVE_REGULATION_OF_NATURAL_KILLER_CELL_MEDIATED_CYTOTOXICITY	8/1098	24/18046	5.60165e-05	0.000930736	0.00069945	VAV1/SLAMF6/SH2D1A/NCR3/IL12B/IL21/CRTAM/RASGRP1	8
GO_SENSORY_PERCEPTION_OF_PAIN	GO_SENSORY_PERCEPTION_OF_PAIN	18/1098	105/18046	5.87936e-05	0.000973758	0.000731782	HTR2A/CNR2/PENK/KCNA1/TAC1/SPX/F2R/P2RX7/GRIN2A/CXCR4/CCL2/LXN/IL12B/ADORA1/KCND2/KCNK4/GIP/UCHL1	18
GO_RENAL_TUBULE_DEVELOPMENT	GO_RENAL_TUBULE_DEVELOPMENT	17/1098	96/18046	6.137e-05	0.00101319	0.000761416	MEF2C/GLI3/BCL2/FAT4/FGF1/ADAMTS16/WWTR1/GREM1/HEYL/GATA3/NOTCH2/AGTR2/WNT9B/SIX2/WT1/AGT/IRX1	17
GO_LYMPHOCYTE_HOMEOSTASIS	GO_LYMPHOCYTE_HOMEOSTASIS	13/1098	61/18046	6.20857e-05	0.00102175	0.00076785	GAPT/MEF2C/BCL2/NCKAP1L/CORO1A/SIT1/LMO1/DOCK10/P2RX7/DOCK11/TNFSF13B/JAK3/CD74	13
GO_MACROPHAGE_MIGRATION	GO_MACROPHAGE_MIGRATION	12/1098	53/18046	6.32244e-05	0.0010372	0.000779459	STAP1/CX3CR1/P2RY12/CD200/C5AR1/CCL2/C3AR1/CD200R1/TREM2/CMKLR1/CCL5/CYP19A1	12
GO_REGULATION_OF_SYNAPTIC_PLASTICITY	GO_REGULATION_OF_SYNAPTIC_PLASTICITY	26/1098	187/18046	6.79737e-05	0.00110934	0.00083367	MEF2C/MAP1A/MAP1B/CX3CR1/SYT4/PRNP/DGKI/SORCS2/TNR/SHISA8/GRIN2A/RELN/TYROBP/MAPT/SERPINE2/DRD5/SLC4A10/LZTS1/APOE/ADORA1/AGT/CALB2/CD38/RASGRF1/GIP/SHANK1	26
GO_NEGATIVE_REGULATION_OF_PEPTIDASE_ACTIVITY	GO_NEGATIVE_REGULATION_OF_PEPTIDASE_ACTIVITY	33/1098	264/18046	6.80496e-05	0.00110934	0.00083367	SERPINA9/A2M/TIMP2/SFRP2/C4A/PRNP/CD27/NGFR/C4B/SPOCK1/CR1/COL6A3/CRIM1/TIMP1/SERPINA6/IFI16/SPOCK2/AQP1/CD44/LXN/SERPINE2/C3/TFPI2/PI15/CST6/CRB2/CST4/CD109/AGT/CST2/CST5/CST7/BIRC7	33
GO_MUSCLE_TISSUE_DEVELOPMENT	GO_MUSCLE_TISSUE_DEVELOPMENT	45/1098	406/18046	7.30632e-05	0.00118733	0.000892285	SGCD/MEF2C/MYLK/IGF1/SLC8A1/MEOX2/BCL2/MYH11/AKAP6/RGS4/HEG1/GREM1/CDON/COL3A1/GJC1/HIVEP3/GJA5/NKX2-5/FHOD3/SGCB/PAX5/HEYL/MSC/LOX/AGTR2/ENG/TENM4/PDGFRB/TGFB1/NOX4/HAMP/GJA1/TGFB2/EOMES/ALDH1A2/SEMA3C/HDAC9/MYH10/WT1/AGT/TWIST1/FOXC2/CAV2/KEL/MEGF10	45
GO_EPITHELIAL_CELL_DIFFERENTIATION_INVOLVED_IN_KIDNEY_DEVELOPMENT	GO_EPITHELIAL_CELL_DIFFERENTIATION_INVOLVED_IN_KIDNEY_DEVELOPMENT	11/1098	46/18046	7.46804e-05	0.00120982	0.000909185	MEF2C/FAT4/WWTR1/GREM1/BASP1/GATA3/NOTCH2/WNT9B/SIX2/WT1/FOXC2	11
GO_NEGATIVE_REGULATION_OF_INFLAMMATORY_RESPONSE	GO_NEGATIVE_REGULATION_OF_INFLAMMATORY_RESPONSE	25/1098	178/18046	7.88255e-05	0.001273	0.000956659	IGF1/SYT11/PTGIS/CNR2/FCGR2B/ELANE/SIGLEC10/PTPRC/CD200/ABCD2/NLRC3/ETS1/TNFAIP8L2/GATA3/CD200R1/CDH5/IL12B/CALCRL/DUSP10/APOE/ADORA1/NLRP3/TNFAIP6/CST7/CYP19A1	25
GO_ANCHORED_COMPONENT_OF_EXTERNAL_SIDE_OF_PLASMA_MEMBRANE	GO_ANCHORED_COMPONENT_OF_EXTERNAL_SIDE_OF_PLASMA_MEMBRANE	7/1098	19/18046	7.98157e-05	0.00127705	0.000959708	THY1/FOLR2/IGSF21/PRNP/PRND/CD14/GP1BA	7
GO_CHRONIC_INFLAMMATORY_RESPONSE	GO_CHRONIC_INFLAMMATORY_RESPONSE	7/1098	19/18046	7.98157e-05	0.00127705	0.000959708	VCAM1/CXCL13/LTA/GJA1/CCL5/CYP19A1/IDO1	7
GO_MATURE_B_CELL_DIFFERENTIATION_INVOLVED_IN_IMMUNE_RESPONSE	GO_MATURE_B_CELL_DIFFERENTIATION_INVOLVED_IN_IMMUNE_RESPONSE	7/1098	19/18046	7.98157e-05	0.00127705	0.000959708	FCGR2B/PLCG2/LGALS1/GPR183/DOCK10/DOCK11/NOTCH2	7
GO_REGULATION_OF_T_CELL_MEDIATED_IMMUNITY	GO_REGULATION_OF_T_CELL_MEDIATED_IMMUNITY	14/1098	71/18046	8.08279e-05	0.00128927	0.000968888	CD1C/WAS/FCGR2B/SASH3/PTPRC/CD1E/GATA3/P2RX7/LILRB1/IL12B/IL12RB1/NLRP3/IL6/CLC	14
GO_HOMEOSTASIS_OF_NUMBER_OF_CELLS	GO_HOMEOSTASIS_OF_NUMBER_OF_CELLS	31/1098	244/18046	8.24076e-05	0.00131043	0.000984793	GAPT/MEF2C/RASSF2/BCL2/AXL/NCKAP1L/SASH3/CORO1A/SIT1/GPR183/PIK3CD/LMO1/IKZF1/MAFB/ETS1/DOCK10/CCR7/F2R/GATA3/P2RX7/DOCK11/CCR4/SPI1/TNFSF13B/PDE4B/JAK3/INPP5D/JAK2/CD74/IL6/ILDR2	31
GO_OUTFLOW_TRACT_MORPHOGENESIS	GO_OUTFLOW_TRACT_MORPHOGENESIS	15/1098	80/18046	8.35061e-05	0.00132384	0.000994868	MEF2C/PARVA/NRP2/SFRP2/GJA5/ROBO1/NKX2-5/HEYL/ENG/NRP1/FZD1/TGFB2/SEMA3C/TWIST1/FOXC2	15
GO_CELL_RECOGNITION	GO_CELL_RECOGNITION	28/1098	211/18046	8.39128e-05	0.00132623	0.000996667	HVCN1/MSN/CCL19/EPHA3/TNN/NCAM2/ROBO1/PECAM1/CCR7/CXCR4/DOCK8/CCL21/NRP1/VCAN/IGHV1OR15-1/CD6/NCR3/TRBC2/HAVCR2/CD209/CATSPER1/NTM/CRTAM/IGHG4/IGHV1-69-2/IGHV3-20/SEMA3A/MEGF10	28
GO_GLOMERULUS_DEVELOPMENT	GO_GLOMERULUS_DEVELOPMENT	13/1098	63/18046	8.83885e-05	0.00139272	0.00104663	MEF2C/BCL2/WWTR1/BASP1/PECAM1/HEYL/NOTCH2/AGTR2/PDGFRB/SULF1/WT1/ENPEP/FOXC2	13
GO_OSTEOBLAST_DIFFERENTIATION	GO_OSTEOBLAST_DIFFERENTIATION	29/1098	223/18046	9.10999e-05	0.0014311	0.00107547	MEF2C/GLI3/IGF1/RASSF2/WWTR1/TNC/GREM1/PENK/MRC2/SFRP2/TNN/NPPC/TMEM119/SH3PXD2B/DHH/BMP3/GLI2/LOX/VCAN/GPNMB/COL1A1/FZD1/SEMA7A/ITGA11/TWIST1/CTHRC1/SPP1/NELL1/IL6	29
GO_REGULATION_OF_CD4_POSITIVE_ALPHA_BETA_T_CELL_DIFFERENTIATION	GO_REGULATION_OF_CD4_POSITIVE_ALPHA_BETA_T_CELL_DIFFERENTIATION	11/1098	47/18046	9.21916e-05	0.00144387	0.00108507	CCL19/NCKAP1L/SASH3/GATA3/JAK3/CD83/IL12B/CD86/IL12RB1/NLRP3/SOCS1	11
GO_REGULATION_OF_LYMPHOCYTE_APOPTOTIC_PROCESS	GO_REGULATION_OF_LYMPHOCYTE_APOPTOTIC_PROCESS	12/1098	55/18046	9.28984e-05	0.0014462	0.00108682	CD27/P2RX7/DOCK8/JAK3/CD3G/PTCRA/CD274/CCL5/PDCD1/CD74/BIRC7/IDO1	12
GO_RESPONSE_TO_AMYLOID_BETA	GO_RESPONSE_TO_AMYLOID_BETA	12/1098	55/18046	9.28984e-05	0.0014462	0.00108682	IGF1/TLR6/FCGR2B/CACNA2D1/PRNP/NGFR/VCAM1/MMP2/ITGA4/TLR4/TREM2/GJA1	12
GO_NEGATIVE_REGULATION_OF_CELL_MOTILITY	GO_NEGATIVE_REGULATION_OF_CELL_MOTILITY	40/1098	350/18046	9.3297e-05	0.00144806	0.00108822	MEF2C/DPYSL3/MEOX2/BCL2/PRKG1/STAP1/ARHGDIB/WAS/GREM1/GPR18/CX3CR1/THY1/SFRP2/TNN/COL3A1/CD200/LDLRAD4/VCL/VASH1/ROBO1/AIF1/CXCL13/GATA3/AGTR2/CCL2/ENG/TIMP1/CCL21/TGFB1/CD200R1/RRAS/SULF1/GJA1/DUSP10/APOE/ADORA1/CD74/CYP19A1/SEMA3A/NRG3	40
GO_LYMPHOCYTE_APOPTOTIC_PROCESS	GO_LYMPHOCYTE_APOPTOTIC_PROCESS	14/1098	72/18046	9.47958e-05	0.00146693	0.0011024	GLI3/CD27/P2RX7/DOCK8/JAK3/CD3G/PTCRA/CD274/CCL5/PDCD1/CD74/BIRC7/CLC/IDO1	14
GO_HOMOTYPIC_CELL_CELL_ADHESION	GO_HOMOTYPIC_CELL_CELL_ADHESION	15/1098	81/18046	9.68038e-05	0.00149354	0.0011224	FLNA/PRKG1/PIK3CG/LGALS1/CTNNA3/P2RY12/TLN1/VCL/ITGB3/SERPINE2/PLEK/GP1BA/FERMT3/CCL5/MEGF10	15
GO_CD8_POSITIVE_ALPHA_BETA_T_CELL_DIFFERENTIATION	GO_CD8_POSITIVE_ALPHA_BETA_T_CELL_DIFFERENTIATION	6/1098	14/18046	9.8386e-05	0.00151345	0.00113736	BCL2/NCKAP1L/GPR18/TNFSF8/EOMES/SOCS1	6
GO_ARTERY_DEVELOPMENT	GO_ARTERY_DEVELOPMENT	17/1098	100/18046	0.000104095	0.00159415	0.001198	MYLK/GLI3/PRICKLE1/LTBP1/COL3A1/GJA5/ROBO1/PRRX1/LOXL1/LOX/ENG/NRP1/PDGFRB/TGFB2/MYH10/APOE/FOXC2	17
GO_POSITIVE_REGULATION_OF_RESPONSE_TO_BIOTIC_STIMULUS	GO_POSITIVE_REGULATION_OF_RESPONSE_TO_BIOTIC_STIMULUS	44/1098	400/18046	0.000104247	0.00159415	0.001198	RFTN1/LY86/TLR10/PJA2/TLR6/FCRL3/PLCG2/LILRA4/SCIMP/TLR7/TLR9/VAV1/CD180/TLR1/CTSK/LY96/SLAMF6/PYHIN1/IFI16/CLEC4C/SH2D1A/TLR4/TRIM6/NCR3/ITGB2/NLRC4/CTSL/IL12B/CD14/HAVCR2/TRIL/MUC16/MNDA/CD209/IL21/CRTAM/CD274/RASGRP1/CCL5/TLR8/CLNK/ITGAM/AIM2/GBP5	44
GO_MONOCYTE_CHEMOTAXIS	GO_MONOCYTE_CHEMOTAXIS	13/1098	64/18046	0.000104819	0.00159561	0.0011991	CCL19/GREM1/AIF1/CCL2/CCL21/CCL13/CCR1/CCL26/CCL22/CCL5/CCL17/IL6/XCL2	13
GO_NEURON_MIGRATION	GO_NEURON_MIGRATION	23/1098	160/18046	0.000104958	0.00159561	0.0011991	MEF2C/FLNA/FLRT2/MAP1B/PRKG1/AXL/NRP2/TNN/COL3A1/DCX/SPOCK1/GATA3/CXCR4/RELN/CCR4/NRP1/LHX6/MYH10/TWIST1/MATN2/SEMA3A/NDNF/NRG3	23
GO_POSITIVE_REGULATION_OF_MAP_KINASE_ACTIVITY	GO_POSITIVE_REGULATION_OF_MAP_KINASE_ACTIVITY	32/1098	259/18046	0.000108758	0.00164707	0.00123778	IGF1/HTR2A/MDFIC/FGF1/TLR6/MAP4K1/ITGA1/PIK3CG/CCL19/ELANE/TLR9/PTPRC/NRK/ROBO1/PDE5A/F2R/P2RX7/C5AR1/CXCR4/CD40LG/PDGFRB/TGFB1/TLR4/NOX4/HTR2B/ADORA1/JAK2/FPR1/RASGRP1/TIAM1/CD74/BIRC7	32
GO_PHOSPHATIDYLINOSITOL_3_KINASE_SIGNALING	GO_PHOSPHATIDYLINOSITOL_3_KINASE_SIGNALING	22/1098	150/18046	0.000108979	0.00164707	0.00123778	IGF1/HTR2A/PIP4K2A/PIK3CG/SELP/PIK3CD/NLRC3/CD28/F2R/GATA3/HCST/RELN/PDGFRB/NCF1/SERPINE2/TGFB2/HTR2B/AGT/JAK2/RASGRP1/CCL5/TWIST1	22
GO_RESPONSE_TO_BMP	GO_RESPONSE_TO_BMP	24/1098	171/18046	0.000109879	0.00165585	0.00124437	FSTL1/FBN1/GREM1/RNF165/ZNF423/SFRP2/SFRP4/HTRA1/BMP3/HEYL/GATA3/NOTCH2/ENG/HTRA3/TGFB1/CDH5/LEFTY2/FZD1/SULF1/TGFB2/CRB2/DAND5/GDF5/GDF3	24
GO_POSITIVE_REGULATION_OF_MYELOID_LEUKOCYTE_DIFFERENTIATION	GO_POSITIVE_REGULATION_OF_MYELOID_LEUKOCYTE_DIFFERENTIATION	12/1098	56/18046	0.000111764	0.00167938	0.00126206	EVI2B/NOTCH2/CD4/TGFB1/TYROBP/TREM2/IL12B/CCR1/IL34/SLC9B2/IL5/CD74	12
GO_NEGATIVE_REGULATION_OF_TISSUE_REMODELING	GO_NEGATIVE_REGULATION_OF_TISSUE_REMODELING	7/1098	20/18046	0.000116364	0.00174345	0.00131021	GREM1/TMEM119/P2RX7/INPP5D/AGT/CD38/IL6	7
GO_POSITIVE_REGULATION_OF_NEURON_DIFFERENTIATION	GO_POSITIVE_REGULATION_OF_NEURON_DIFFERENTIATION	42/1098	378/18046	0.000118846	0.0017755	0.00133429	MEF2C/ZEB1/DPYSL3/MAP1B/BCL2/ZNF804A/PLXNA4/BEND6/TCF4/EPHA3/TIMP2/ARSB/CDON/SYT4/NGFR/BRINP2/CNTN1/ROBO1/NKX2-5/GLI2/HEYL/CXCR4/PLXNC1/RELN/NRP1/ISLR2/CPNE5/MAPT/FN1/CAMK1D/FZD1/IL1RAPL1/SEMA7A/BRINP3/APOE/AGT/GDF5/TIAM1/CPNE6/TENM3/SHANK1/NDNF	42
GO_REGULATION_OF_OSTEOCLAST_DIFFERENTIATION	GO_REGULATION_OF_OSTEOCLAST_DIFFERENTIATION	13/1098	65/18046	0.000123821	0.0018445	0.00138615	RASSF2/FBN1/MAFB/NOTCH2/TYROBP/TLR4/TREM2/LILRB1/IL12B/CCR1/INPP5D/LILRB4/SLC9B2	13
GO_PROTEIN_TYROSINE_KINASE_BINDING	GO_PROTEIN_TYROSINE_KINASE_BINDING	16/1098	92/18046	0.00012496	0.00185613	0.00139489	STAP1/FCRL3/BANK1/SHC4/CD4/SH2B2/TRAT1/TREM2/TRIM6/CDH5/NOX4/DOK2/CD2/CASS4/TIAM1/NRG3	16
GO_SKELETAL_SYSTEM_MORPHOGENESIS	GO_SKELETAL_SYSTEM_MORPHOGENESIS	30/1098	239/18046	0.000132654	0.00196479	0.00147655	MGP/MEF2C/GLI3/COL14A1/RAB23/ZEB1/GREM1/SFRP2/CHST11/NKX3-2/NPPC/TMEM119/SFRP4/SH3PXD2B/COL6A3/MMP2/PRRX1/PAX5/P2RX7/WNT9B/MMP16/SIX2/COL1A1/PHOSPHO1/FREM1/COL12A1/TIFAB/TWIST1/FOXC2/MATN2	30
GO_GLUTAMATERGIC_SYNAPSE	GO_GLUTAMATERGIC_SYNAPSE	40/1098	356/18046	0.000134736	0.00198994	0.00149545	HTR2A/FLNA/ATP2B4/CORO1A/NRP2/NCS1/CDH11/GPC6/KCNA1/SYT4/DGKI/ACTN1/TNR/ITGB3/DRP2/ARHGAP22/NPTX1/SPARC/GRIN2A/RGS7BP/SLITRK4/NRP1/NTNG2/LRRTM3/SRGN/KCNA3/PCDH17/ABLIM3/LRRC4C/IL1RAPL1/CNIH2/MYH10/APOE/KCND2/GRID1/JAK2/NLGN4X/TIAM1/SHANK1/NRG3	40
GO_POSITIVE_REGULATION_OF_PHOSPHOLIPID_METABOLIC_PROCESS	GO_POSITIVE_REGULATION_OF_PHOSPHOLIPID_METABOLIC_PROCESS	11/1098	49/18046	0.000137898	0.00203087	0.0015262	HTR2A/CD19/CCL19/P2RY12/CCR7/CCL21/PDGFRB/TGFB1/HTR2B/AGAP2/APOC2	11
GO_PROTEIN_KINASE_B_SIGNALING	GO_PROTEIN_KINASE_B_SIGNALING	33/1098	274/18046	0.00013982	0.00205333	0.00154308	IGF1/FGF7/AXL/FGF1/CD19/PIK3CG/CCL19/CX3CR1/P2RY12/VAV1/PIK3CD/BANK1/CD28/CCR7/RAC2/GATA3/SESN3/LOX/CCL2/ENG/CCL21/FGF5/PDGFRB/TGFB1/TRAT1/RASD2/NOX4/RRAS/CD86/RCN3/LCK/CCL5/PHLDA3	33
GO_AMIDE_BINDING	GO_AMIDE_BINDING	40/1098	357/18046	0.000143069	0.00209074	0.0015712	BCHE/CD1C/TLR6/FCGR2B/GRPR/FOLR2/PRNP/NGFR/CD1E/TLR1/MSR1/GRIN2A/RAMP2/TLR4/TREM2/ITGB2/TRAV8-4/TRAV29DV5/TRGV3/CALCRL/CD14/TGFB2/TRBV7-9/C1QA/APOE/CD209/HLA-DPB1/FOLH1/NPR3/ENPEP/HLA-DRA/TRBV12-3/CD74/TRAV19/ITGAM/HLA-DPA1/HLA-DQA1/NPBWR1/ANPEP/GPR1	40
GO_INNERVATION	GO_INNERVATION	8/1098	27/18046	0.000143577	0.00209074	0.0015712	RNF165/VCAM1/NPTX1/NRP1/ITGA4/SERPINE2/SULF1/SEMA3A	8
GO_OUTFLOW_TRACT_SEPTUM_MORPHOGENESIS	GO_OUTFLOW_TRACT_SEPTUM_MORPHOGENESIS	8/1098	27/18046	0.000143577	0.00209074	0.0015712	PARVA/NRP2/ROBO1/NKX2-5/ENG/NRP1/TGFB2/SEMA3C	8
GO_POSITIVE_REGULATION_OF_PHOSPHATASE_ACTIVITY	GO_POSITIVE_REGULATION_OF_PHOSPHATASE_ACTIVITY	9/1098	34/18046	0.000145215	0.00210866	0.00158466	MEF2C/ITGA1/FCRL3/PPP1R12A/PTPRC/AGTR2/PDGFRB/PLEK/JAK2	9
GO_COGNITION	GO_COGNITION	35/1098	298/18046	0.000146832	0.0021262	0.00159784	BCHE/MEF2C/HTR2A/MAP1A/SYT11/NRXN2/PJA2/TACR2/GPR88/GRPR/NRXN3/CX3CR1/SYT4/PRNP/TAC1/DGKI/TNR/GRIN2A/C5AR1/RELN/MAPT/DRD5/CBR3/APOE/ADORA1/AGT/AFF2/TIFAB/HLA-DRA/NLGN4X/RASGRF1/KCNK4/LRRN4/GIP/SHANK1	35
GO_GAMMA_DELTA_T_CELL_ACTIVATION	GO_GAMMA_DELTA_T_CELL_ACTIVATION	6/1098	15/18046	0.000155546	0.00223366	0.0016786	NCKAP1L/GPR18/PTPRC/LILRB1/CCR9/EGR3	6
GO_NEGATIVE_REGULATION_OF_BONE_REMODELING	GO_NEGATIVE_REGULATION_OF_BONE_REMODELING	6/1098	15/18046	0.000155546	0.00223366	0.0016786	GREM1/TMEM119/P2RX7/INPP5D/CD38/IL6	6
GO_OPSONIN_BINDING	GO_OPSONIN_BINDING	6/1098	15/18046	0.000155546	0.00223366	0.0016786	C4A/CR1/ITGB2/CD93/ITGAM/MEGF10	6
GO_POSITIVE_REGULATION_OF_DEPHOSPHORYLATION	GO_POSITIVE_REGULATION_OF_DEPHOSPHORYLATION	12/1098	58/18046	0.000159509	0.0022794	0.00171297	MEF2C/ITGA1/FCRL3/PPP1R12A/PTPRC/AGTR2/PDGFRB/TGFB1/CDH5/PLEK/ADORA1/JAK2	12
GO_DENDRITIC_CELL_APOPTOTIC_PROCESS	GO_DENDRITIC_CELL_APOPTOTIC_PROCESS	5/1098	10/18046	0.00016093	0.0022794	0.00171297	AXL/CCL19/CCR7/CCL21/LILRB1	5
GO_LIPOPEPTIDE_BINDING	GO_LIPOPEPTIDE_BINDING	5/1098	10/18046	0.00016093	0.0022794	0.00171297	CD1C/TLR6/CD1E/TLR1/CD14	5
GO_REGULATION_OF_APOPTOTIC_CELL_CLEARANCE	GO_REGULATION_OF_APOPTOTIC_CELL_CLEARANCE	5/1098	10/18046	0.00016093	0.0022794	0.00171297	C4A/C4B/CCL2/TREM2/C3	5
GO_T_CELL_ACTIVATION_VIA_T_CELL_RECEPTOR_CONTACT_WITH_ANTIGEN_BOUND_TO_MHC_MOLECULE_ON_ANTIGEN_PRESENTING_CELL	GO_T_CELL_ACTIVATION_VIA_T_CELL_RECEPTOR_CONTACT_WITH_ANTIGEN_BOUND_TO_MHC_MOLECULE_ON_ANTIGEN_PRESENTING_CELL	5/1098	10/18046	0.00016093	0.0022794	0.00171297	FGL2/ITGAL/LILRB1/HAVCR2/HLA-DMB	5
GO_KIDNEY_MORPHOGENESIS	GO_KIDNEY_MORPHOGENESIS	16/1098	94/18046	0.000162238	0.00229167	0.00172219	GLI3/BCL2/FAT4/FGF1/ADAMTS16/WWTR1/GREM1/BASP1/GATA3/AGTR2/WNT9B/PDGFRB/SIX2/WT1/AGT/IRX1	16
GO_POSITIVE_REGULATION_OF_PHOSPHOPROTEIN_PHOSPHATASE_ACTIVITY	GO_POSITIVE_REGULATION_OF_PHOSPHOPROTEIN_PHOSPHATASE_ACTIVITY	7/1098	21/18046	0.000165417	0.00233022	0.00175116	ITGA1/FCRL3/PPP1R12A/PTPRC/AGTR2/PDGFRB/JAK2	7
GO_ENDODERM_FORMATION	GO_ENDODERM_FORMATION	11/1098	50/18046	0.000167183	0.00234871	0.00176507	COL8A1/MMP2/COL5A1/ITGA4/FN1/ITGB2/COL4A2/EOMES/COL5A2/COL12A1/MIXL1	11
GO_PLATELET_ALPHA_GRANULE_LUMEN	GO_PLATELET_ALPHA_GRANULE_LUMEN	13/1098	67/18046	0.000170867	0.00239399	0.00179909	IGF1/A2M/VEGFC/ACTN1/ISLR/SPARC/TIMP1/TGFB1/SRGN/FN1/LEFTY2/TGFB2/FERMT3	13
GO_TRANSMEMBRANE_RECEPTOR_PROTEIN_SERINE_THREONINE_KINASE_SIGNALING_PATHWAY	GO_TRANSMEMBRANE_RECEPTOR_PROTEIN_SERINE_THREONINE_KINASE_SIGNALING_PATHWAY	39/1098	348/18046	0.000171568	0.00239477	0.00179968	ZEB1/FSTL1/ASPN/LTBP1/VIM/WWTR1/FBN1/GREM1/RNF165/ZNF423/SFRP2/COL3A1/CHST11/NRROS/LDLRAD4/SFRP4/LTBP2/HTRA1/BMP3/NOTCH2/LOX/DKK3/ENG/NREP/COL1A2/DAB2/HTRA3/TGFB1/CDH5/LEFTY2/FZD1/SULF1/TGFB2/CRB2/DAND5/CD109/GDF5/CAV2/GDF3	39
GO_POSITIVE_REGULATION_OF_ION_TRANSPORT	GO_POSITIVE_REGULATION_OF_ION_TRANSPORT	33/1098	277/18046	0.000171847	0.00239477	0.00179968	MYLK/FLNA/AKAP6/CD19/TACR2/PLCG2/P2RY12/THY1/CACNA2D1/KCNA1/SYT4/EHD3/NOS1/CNTN1/NKX2-5/F2R/P2RX7/CCL2/RELN/CD4/STAC/PDGFRB/TREM2/LRRC55/APLNR/KMO/CCR1/APOE/ADORA1/AGT/CCL5/KCNC2/GCG	33
GO_AMINOGLYCAN_BIOSYNTHETIC_PROCESS	GO_AMINOGLYCAN_BIOSYNTHETIC_PROCESS	18/1098	114/18046	0.000175175	0.00242882	0.00182526	OGN/KERA/LUM/OMD/CSGALNACT2/GPC6/CHST11/BGN/SDC3/VCAN/PDGFRB/TGFB1/CHSY3/CHST2/CHST15/GPC5/NDST4/HS3ST2	18
GO_REGULATION_OF_CELL_SUBSTRATE_ADHESION	GO_REGULATION_OF_CELL_SUBSTRATE_ADHESION	27/1098	209/18046	0.000175227	0.00242882	0.00182526	CCDC80/FLNA/ECM2/BCL2/LGALS1/EPHA3/GREM1/COL8A1/THY1/PLEKHA2/FBLN2/SPOCK1/CCR7/RAC2/CCL21/NRP1/MYADM/SPOCK2/FN1/COL1A1/POSTN/BST1/CASS4/CD3E/JAK2/EGFL6/NDNF	27
GO_POSITIVE_REGULATION_OF_PROTEIN_KINASE_B_SIGNALING	GO_POSITIVE_REGULATION_OF_PROTEIN_KINASE_B_SIGNALING	24/1098	177/18046	0.000188424	0.00260477	0.00195749	FGF7/AXL/FGF1/CD19/PIK3CG/CCL19/CX3CR1/P2RY12/VAV1/PIK3CD/CD28/CCR7/RAC2/GATA3/ENG/CCL21/FGF5/PDGFRB/TGFB1/TRAT1/RASD2/NOX4/CD86/LCK	24
GO_CLATHRIN_COATED_ENDOCYTIC_VESICLE	GO_CLATHRIN_COATED_ENDOCYTIC_VESICLE	12/1098	59/18046	0.000189292	0.00260981	0.00196128	CD207/HLA-DQA2/TYRP1/HLA-DQB2/APOE/HLA-DPB1/HLA-DRA/CD74/FCGR1A/HLA-DPA1/CPNE6/HLA-DQA1	12
GO_B_CELL_HOMEOSTASIS	GO_B_CELL_HOMEOSTASIS	8/1098	28/18046	0.000190359	0.00261756	0.0019671	GAPT/MEF2C/BCL2/NCKAP1L/DOCK10/DOCK11/TNFSF13B/CD74	8
GO_REGULATION_OF_MAP_KINASE_ACTIVITY	GO_REGULATION_OF_MAP_KINASE_ACTIVITY	38/1098	338/18046	0.000193744	0.00265706	0.00199679	IGF1/HTR2A/MDFIC/FGF1/RGS4/TLR6/MAP4K1/ITGA1/PIK3CG/CCL19/ELANE/TLR9/SFRP2/PTPRC/NRK/ROBO1/PDE5A/F2R/P2RX7/C5AR1/CXCR4/CD40LG/PDGFRB/TGFB1/TLR4/NOX4/DUSP10/LAX1/HTR2B/APOE/ADORA1/JAK2/FPR1/RASGRP1/TIAM1/CD74/BIRC7/UCHL1	38
GO_POSITIVE_REGULATION_OF_CELL_SUBSTRATE_ADHESION	GO_POSITIVE_REGULATION_OF_CELL_SUBSTRATE_ADHESION	18/1098	115/18046	0.000196091	0.00268215	0.00201564	CCDC80/FLNA/ECM2/COL8A1/THY1/PLEKHA2/FBLN2/CCR7/CCL21/NRP1/MYADM/SPOCK2/FN1/CASS4/CD3E/JAK2/EGFL6/NDNF	18
GO_T_CELL_DIFFERENTIATION_INVOLVED_IN_IMMUNE_RESPONSE	GO_T_CELL_DIFFERENTIATION_INVOLVED_IN_IMMUNE_RESPONSE	13/1098	68/18046	0.000199655	0.00272371	0.00204687	CCL19/FGL2/GPR183/GATA3/SLAMF6/SPN/JAK3/IL12B/CD86/EOMES/IL12RB1/NLRP3/IL6	13
GO_NEGATIVE_REGULATION_OF_SYNAPTIC_TRANSMISSION	GO_NEGATIVE_REGULATION_OF_SYNAPTIC_TRANSMISSION	14/1098	77/18046	0.00020063	0.00272983	0.00205148	BCHE/HTR2A/SYT11/CNR2/SYT4/DGKI/SORCS2/TNR/MAPT/DRD5/PCDH17/ADORA1/NLGN4X/CD38	14
GO_CCR_CHEMOKINE_RECEPTOR_BINDING	GO_CCR_CHEMOKINE_RECEPTOR_BINDING	10/1098	43/18046	0.000202383	0.00274647	0.00206398	CCL19/CXCL13/CCL2/CCL21/CCL13/CCL26/CCL22/CCL5/CCL17/XCL2	10
GO_REGULATION_OF_VASCULATURE_DEVELOPMENT	GO_REGULATION_OF_VASCULATURE_DEVELOPMENT	45/1098	425/18046	0.000210023	0.00283902	0.00213353	PRKCB/HSPB6/MEOX2/PTGIS/RHOJ/THBS4/FGF1/GREM1/CX3CR1/ADGRA2/VEGFC/SFRP2/NGFR/ISM1/ETS1/SRPX2/VASH1/SPARC/CXCL13/C5AR1/CXCR4/RAMP2/ENG/NRP1/NFATC1/GPNMB/C3AR1/AQP1/ITGB2/CDH5/CYBB/COL4A2/C3/RRAS/SULF1/TGFB2/APLNR/HDAC9/THBS2/WT1/AGT/TWIST1/IL6/FOXC2/ADAM12	45
GO_DEVELOPMENTAL_MATURATION	GO_DEVELOPMENTAL_MATURATION	33/1098	280/18046	0.000210298	0.00283902	0.00213353	POU2F2/IGF1/LYL1/MAP1B/BCL2/FAT4/AXL/CCL19/GREM1/CX3CR1/PDE3A/SYT4/IGSF21/NPPC/SEZ6L/NFIA/MMP2/GATA3/CCL21/RELN/LHX6/CDH5/C3/DAZL/TGFB2/CEND1/ALDH1A2/PHOSPHO1/C1QA/FEV/IL21/SEZ6/SHANK1	33
GO_REGULATION_OF_PHOSPHATIDYLINOSITOL_3_KINASE_SIGNALING	GO_REGULATION_OF_PHOSPHATIDYLINOSITOL_3_KINASE_SIGNALING	19/1098	126/18046	0.000217313	0.0029197	0.00219416	IGF1/PIP4K2A/PIK3CG/SELP/PIK3CD/NLRC3/CD28/F2R/HCST/RELN/PDGFRB/NCF1/SERPINE2/TGFB2/AGT/JAK2/RASGRP1/CCL5/TWIST1	19
GO_REGULATION_OF_NEUROTRANSMITTER_LEVELS	GO_REGULATION_OF_NEUROTRANSMITTER_LEVELS	39/1098	352/18046	0.0002174	0.0029197	0.00219416	BCHE/MEF2C/HTR2A/PRKCB/ATP2B4/SYT11/PTGIS/RGS4/NRXN2/CHRNA3/TLR6/TACR2/NCS1/CX3CR1/DPYS/SYT4/DGKI/NOS1/ITGB3/AIF1/P2RX7/GRIN2A/AGTR2/MOXD1/CHRNB4/CHRNA6/TLR4/DPYD/ITGB2/STX11/SLC22A2/CHAT/KMO/RPH3A/AGT/JAK2/SDS/SYN1/DOC2B	39
GO_FOREBRAIN_CELL_MIGRATION	GO_FOREBRAIN_CELL_MIGRATION	12/1098	60/18046	0.00022369	0.00298868	0.002246	GLI3/AXL/NRP2/P2RY12/TNR/ROBO1/CXCR4/RELN/NRP1/LHX6/SEMA3A/NRG3	12
GO_POSITIVE_REGULATION_OF_INTERLEUKIN_1_PRODUCTION	GO_POSITIVE_REGULATION_OF_INTERLEUKIN_1_PRODUCTION	12/1098	60/18046	0.00022369	0.00298868	0.002246	CCL19/P2RX7/PYHIN1/IFI16/TYROBP/TLR4/HAVCR2/MNDA/JAK2/NLRP3/TLR8/AIM2	12
GO_ACUTE_INFLAMMATORY_RESPONSE_TO_ANTIGENIC_STIMULUS	GO_ACUTE_INFLAMMATORY_RESPONSE_TO_ANTIGENIC_STIMULUS	7/1098	22/18046	0.000229933	0.00301612	0.00226662	IL31RA/FCGR2B/ELANE/CCR7/GATA3/CD6/C3	7
GO_IMMUNOGLOBULIN_SECRETION	GO_IMMUNOGLOBULIN_SECRETION	7/1098	22/18046	0.000229933	0.00301612	0.00226662	POU2F2/CD22/CD40LG/TNFSF13B/LAX1/IL5/IL6	7
GO_POSITIVE_REGULATION_OF_MACROPHAGE_MIGRATION	GO_POSITIVE_REGULATION_OF_MACROPHAGE_MIGRATION	7/1098	22/18046	0.000229933	0.00301612	0.00226662	CX3CR1/P2RY12/C5AR1/C3AR1/TREM2/CMKLR1/CCL5	7
GO_NEGATIVE_REGULATION_OF_TUMOR_NECROSIS_FACTOR_SUPERFAMILY_CYTOKINE_PRODUCTION	GO_NEGATIVE_REGULATION_OF_TUMOR_NECROSIS_FACTOR_SUPERFAMILY_CYTOKINE_PRODUCTION	14/1098	78/18046	0.000231041	0.00301612	0.00226662	IGF1/SYT11/AXL/LILRA4/GPR18/NLRC3/GPNMB/TLR4/TREM2/LILRB1/BPI/HAVCR2/CD274/TWIST1	14
GO_NEPHRON_MORPHOGENESIS	GO_NEPHRON_MORPHOGENESIS	14/1098	78/18046	0.000231041	0.00301612	0.00226662	GLI3/BCL2/FAT4/FGF1/ADAMTS16/GREM1/GATA3/AGTR2/WNT9B/PDGFRB/SIX2/WT1/AGT/IRX1	14
GO_RESPONSE_TO_AXON_INJURY	GO_RESPONSE_TO_AXON_INJURY	14/1098	78/18046	0.000231041	0.00301612	0.00226662	DPYSL3/MAP1B/BCL2/TNC/LGALS1/P2RY12/TNR/AIF1/NREP/TYROBP/JAK2/SPP1/MATN2/GIP	14
GO_MYD88_DEPENDENT_TOLL_LIKE_RECEPTOR_SIGNALING_PATHWAY	GO_MYD88_DEPENDENT_TOLL_LIKE_RECEPTOR_SIGNALING_PATHWAY	9/1098	36/18046	0.000233494	0.00301612	0.00226662	TLR10/TLR6/TLR7/TLR9/TLR1/LY96/TLR4/CD14/TLR8	9
GO_NEGATIVE_REGULATION_OF_INTERFERON_GAMMA_PRODUCTION	GO_NEGATIVE_REGULATION_OF_INTERFERON_GAMMA_PRODUCTION	9/1098	36/18046	0.000233494	0.00301612	0.00226662	AXL/PRNP/GATA3/TLR4/PDCD1LG2/LILRB1/HAVCR2/CD96/CD274	9
GO_POSITIVE_REGULATION_OF_CD4_POSITIVE_ALPHA_BETA_T_CELL_ACTIVATION	GO_POSITIVE_REGULATION_OF_CD4_POSITIVE_ALPHA_BETA_T_CELL_ACTIVATION	9/1098	36/18046	0.000233494	0.00301612	0.00226662	CCL19/NCKAP1L/SASH3/CD83/IL12B/CD86/IL12RB1/NLRP3/SOCS1	9
GO_POSITIVE_REGULATION_OF_INTERLEUKIN_12_PRODUCTION	GO_POSITIVE_REGULATION_OF_INTERLEUKIN_12_PRODUCTION	9/1098	36/18046	0.000233494	0.00301612	0.00226662	CCL19/SCIMP/TLR9/CCR7/CD40LG/TLR4/LTB/IL12B/IDO1	9
GO_PROTEOGLYCAN_BINDING	GO_PROTEOGLYCAN_BINDING	9/1098	36/18046	0.000233494	0.00301612	0.00226662	TNC/PTPRC/CTSK/COL5A1/GPNMB/FN1/CTSL/APOE/PLA2G2D	9
GO_SUPEROXIDE_ANION_GENERATION	GO_SUPEROXIDE_ANION_GENERATION	9/1098	36/18046	0.000233494	0.00301612	0.00226662	TGFB1/TYROBP/MAPT/NCF1/ITGB2/NOX4/CYBB/AGT/ITGAM	9
GO_CELL_CELL_ADHESION_MEDIATED_BY_INTEGRIN	GO_CELL_CELL_ADHESION_MEDIATED_BY_INTEGRIN	6/1098	16/18046	0.000236093	0.00301612	0.00226662	SWAP70/CXCL13/ITGA4/FERMT3/CD3E/CCL5	6
GO_MACROPHAGE_CYTOKINE_PRODUCTION	GO_MACROPHAGE_CYTOKINE_PRODUCTION	6/1098	16/18046	0.000236093	0.00301612	0.00226662	TGFB1/TLR4/LILRB1/TGFB2/SEMA7A/CD74	6
GO_POSITIVE_REGULATION_OF_TYPE_2_IMMUNE_RESPONSE	GO_POSITIVE_REGULATION_OF_TYPE_2_IMMUNE_RESPONSE	6/1098	16/18046	0.000236093	0.00301612	0.00226662	GATA3/CD86/NLRP3/CD74/IL6/IDO1	6
GO_REGULATION_OF_MEMBRANE_INVAGINATION	GO_REGULATION_OF_MEMBRANE_INVAGINATION	6/1098	16/18046	0.000236093	0.00301612	0.00226662	SYT11/STAP1/NCKAP1L/RAB31/TREM2/C3	6
GO_REGULATION_OF_TOLERANCE_INDUCTION	GO_REGULATION_OF_TOLERANCE_INDUCTION	6/1098	16/18046	0.000236093	0.00301612	0.00226662	HAVCR2/CD3E/CD274/PDCD1/CLC/IDO1	6
GO_POSITIVE_REGULATION_OF_PRODUCTION_OF_MOLECULAR_MEDIATOR_OF_IMMUNE_RESPONSE	GO_POSITIVE_REGULATION_OF_PRODUCTION_OF_MOLECULAR_MEDIATOR_OF_IMMUNE_RESPONSE	16/1098	97/18046	0.000236216	0.00301612	0.00226662	SASH3/SCIMP/TLR9/PTPRC/CD28/GATA3/TGFB1/TLR4/TRIM6/LILRB1/SEMA7A/NLRP3/IL5/CD74/CLNK/IL6	16
GO_GLIAL_CELL_MIGRATION	GO_GLIAL_CELL_MIGRATION	11/1098	52/18046	0.000241776	0.00307953	0.00231427	GLI3/STAP1/CX3CR1/P2RY12/GPR183/CCL2/RELN/TREM2/TGFB2/TIAM1/MATN2	11
GO_ACTIN_BINDING	GO_ACTIN_BINDING	45/1098	428/18046	0.000245822	0.00311773	0.00234298	KLHL4/PDLIM3/MYLK/CALD1/FLNA/FLNC/CNN1/MAP1A/KCNMA1/MAP1B/PARVA/WIPF1/MYH11/MSN/CAP2/WAS/FMNL3/MYBPC2/CORO1A/CTNNA3/TLN1/MYO1G/KLHL5/FMNL1/PPP1R18/ACTN1/LCP1/VCL/VASH1/FHOD3/AIF1/ANTXR1/CXCR4/EPB41L3/ADD2/MYO1F/MICAL2/MAPT/CCR5/ABLIM3/CCDC88A/MYH10/SYN1/TMSB15A/MYO16	45
GO_REGULATION_OF_CELL_MORPHOGENESIS	GO_REGULATION_OF_CELL_MORPHOGENESIS	50/1098	491/18046	0.000246852	0.00311773	0.00234298	FLNA/CDC42EP3/MAP1B/PARVA/RHOJ/ARHGAP15/MSN/CHRNA3/PLXNA4/FMNL3/CORO1A/THY1/SYT4/NGFR/FMNL1/TNR/ROBO1/SPARC/RAC2/CXCR4/CCL2/EPB41L3/PLXNC1/RELN/NRP1/LST1/MYADM/ISLR2/CPNE5/MAPT/CD44/FN1/ITGB2/CCL13/LZTS1/SEMA6B/LRRC4C/IL1RAPL1/POSTN/SEMA3C/CHN1/SEMA7A/MYH10/CASS4/APOE/TIAM1/SPP1/CPNE6/SEMA3A/KEL	50
GO_NEGATIVE_CHEMOTAXIS	GO_NEGATIVE_CHEMOTAXIS	10/1098	44/18046	0.000247783	0.00311773	0.00234298	FLRT2/PLXNA4/NRP2/ITGB3/ROBO1/SEMA6B/SEMA3C/SEMA7A/SEMA3A/NRG3	10
GO_POSITIVE_REGULATION_OF_PROTEIN_DEPHOSPHORYLATION	GO_POSITIVE_REGULATION_OF_PROTEIN_DEPHOSPHORYLATION	10/1098	44/18046	0.000247783	0.00311773	0.00234298	ITGA1/FCRL3/PPP1R12A/PTPRC/AGTR2/PDGFRB/TGFB1/CDH5/ADORA1/JAK2	10
GO_REGULATION_OF_T_CELL_MIGRATION	GO_REGULATION_OF_T_CELL_MIGRATION	10/1098	44/18046	0.000247783	0.00311773	0.00234298	CD200/AIF1/CXCL13/SPN/DOCK8/CCL21/ITGA4/CD200R1/CCL5/XCL2	10
GO_METALLOCARBOXYPEPTIDASE_ACTIVITY	GO_METALLOCARBOXYPEPTIDASE_ACTIVITY	8/1098	29/18046	0.000248962	0.00312498	0.00234843	CPXM2/CPXM1/AEBP1/CPZ/VASH1/FOLH1/CPA1/FOLH1B	8
GO_HEART_PROCESS	GO_HEART_PROCESS	34/1098	295/18046	0.000259498	0.00324936	0.0024419	SGCD/FLNA/SLC8A1/ATP2B4/RGS4/WWTR1/ABCC9/PIK3CG/CLIC2/CTNNA3/KCNIP1/CACNA2D1/GJC1/TAC1/EHD3/SPX/NPPC/GJA5/NOS1/NKX2-5/PDE5A/FXYD2/AGTR2/CXCR4/PDE4B/NOX4/GJA1/TGFB2/ADORA1/KCND2/AGT/JAK2/KCND3/SEMA3A	34
GO_REGULATION_OF_CD4_POSITIVE_ALPHA_BETA_T_CELL_ACTIVATION	GO_REGULATION_OF_CD4_POSITIVE_ALPHA_BETA_T_CELL_ACTIVATION	12/1098	61/18046	0.000263266	0.00328861	0.0024714	CCL19/NCKAP1L/SASH3/GATA3/JAK3/CD83/IL12B/CD86/IL12RB1/CD274/NLRP3/SOCS1	12
GO_TRANSFORMING_GROWTH_FACTOR_BETA_RECEPTOR_SIGNALING_PATHWAY	GO_TRANSFORMING_GROWTH_FACTOR_BETA_RECEPTOR_SIGNALING_PATHWAY	25/1098	192/18046	0.000265256	0.0033055	0.00248409	ZEB1/ASPN/LTBP1/FBN1/COL3A1/CHST11/NRROS/LDLRAD4/LTBP2/HTRA1/LOX/DKK3/ENG/NREP/COL1A2/DAB2/HTRA3/TGFB1/CDH5/LEFTY2/TGFB2/DAND5/CD109/GDF5/CAV2	25
GO_REGULATION_OF_PEPTIDASE_ACTIVITY	GO_REGULATION_OF_PEPTIDASE_ACTIVITY	47/1098	455/18046	0.000271373	0.00337361	0.00253528	SERPINA9/A2M/PCOLCE/TIMP2/SFRP2/C4A/PRNP/CD27/NGFR/C4B/SPOCK1/CR1/COL6A3/ROBO1/F2R/GRIN2A/ANTXR1/CRIM1/TIMP1/SERPINA6/IFI16/MAPT/SPOCK2/AQP1/CD44/FN1/LXN/SERPINE2/FAS/C3/TFPI2/NLRC4/PI15/RCN3/CST6/CRB2/CST4/LCK/CD109/AGT/JAK2/CST2/NLRP3/CST5/CST7/AIM2/BIRC7	47
GO_RECEPTOR_MEDIATED_ENDOCYTOSIS	GO_RECEPTOR_MEDIATED_ENDOCYTOSIS	36/1098	320/18046	0.000278662	0.00344274	0.00258723	SYT11/FCGR2B/CCL19/PLCG2/GREM1/RAB31/FOLR2/SFRP4/ITGB3/CLEC9A/MSR1/SPARC/CD207/RAMP2/CCL21/ITGA4/DAB2/IGHV1OR15-1/ITGB2/C3/LILRB1/CALCRL/CD14/HP/HTR2B/MRC1/APOE/APOC1/SLC9B2/ITGAM/FCGR1A/IGKV2D-30/CAV2/IGKV2-29/APOC2/IGKV4-1	36
GO_PLATELET_DERIVED_GROWTH_FACTOR_BINDING	GO_PLATELET_DERIVED_GROWTH_FACTOR_BINDING	5/1098	11/18046	0.000280254	0.00344274	0.00258723	COL3A1/COL5A1/COL1A2/PDGFRB/COL1A1	5
GO_REGULATION_OF_CELL_CELL_ADHESION_MEDIATED_BY_INTEGRIN	GO_REGULATION_OF_CELL_CELL_ADHESION_MEDIATED_BY_INTEGRIN	5/1098	11/18046	0.000280254	0.00344274	0.00258723	SWAP70/CXCL13/FERMT3/CD3E/CCL5	5
GO_REGULATION_OF_HUMORAL_IMMUNE_RESPONSE_MEDIATED_BY_CIRCULATING_IMMUNOGLOBULIN	GO_REGULATION_OF_HUMORAL_IMMUNE_RESPONSE_MEDIATED_BY_CIRCULATING_IMMUNOGLOBULIN	5/1098	11/18046	0.000280254	0.00344274	0.00258723	FCGR2B/FCER2/PTPRC/CR1/LTA	5
GO_TONIC_SMOOTH_MUSCLE_CONTRACTION	GO_TONIC_SMOOTH_MUSCLE_CONTRACTION	5/1098	11/18046	0.000280254	0.00344274	0.00258723	MYLK/HTR2A/EDNRA/AGT/CD38	5
GO_RHO_PROTEIN_SIGNAL_TRANSDUCTION	GO_RHO_PROTEIN_SIGNAL_TRANSDUCTION	26/1098	204/18046	0.000284355	0.00348486	0.00261888	P2RY8/CDC42EP3/RHOJ/ARHGDIB/LPAR4/WAS/HEG1/GPR18/VAV1/COL3A1/RHOH/NGFR/GPR65/P2RY10/ABCA1/ROBO1/PECAM1/F2R/RAC2/COL1A2/NRP1/PDGFRB/RASGRF2/APOE/TIAM1/RASGRF1	26
GO_INOSITOL_LIPID_MEDIATED_SIGNALING	GO_INOSITOL_LIPID_MEDIATED_SIGNALING	25/1098	193/18046	0.00028753	0.00351546	0.00264188	IGF1/HTR2A/PIP4K2A/PIK3CG/PLCG2/NCS1/SELP/PIK3CD/NLRC3/CD28/F2R/GATA3/HCST/RELN/PDGFRB/NCF1/SERPINE2/TGFB2/HTR2B/AGT/NPR3/JAK2/RASGRP1/CCL5/TWIST1	25
GO_COLLAGEN_BIOSYNTHETIC_PROCESS	GO_COLLAGEN_BIOSYNTHETIC_PROCESS	11/1098	53/18046	0.00028854	0.00351951	0.00264492	VIM/NPPC/F2R/ENG/COL5A1/PDGFRB/TGFB1/COL1A1/RCN3/CIITA/IL6	11
GO_SEMI_LUNAR_VALVE_DEVELOPMENT	GO_SEMI_LUNAR_VALVE_DEVELOPMENT	9/1098	37/18046	0.000292052	0.00355398	0.00267083	GJA5/ROBO1/HEYL/GATA3/NOTCH2/NFATC1/TGFB1/TGFB2/TWIST1	9
GO_ANTIGEN_PROCESSING_AND_PRESENTATION	GO_ANTIGEN_PROCESSING_AND_PRESENTATION	28/1098	227/18046	0.000293165	0.00355917	0.00267473	RFTN1/CD1C/WAS/FCGR2B/CCL19/FGL2/RAB33A/CD1E/RAB8B/AP1S2/CCR7/CD207/CCL21/NCF1/TREM2/CYBB/CTSL/HLA-DQA2/HLA-DMB/HLA-DQB2/CD209/HLA-DPB1/HLA-DRA/HLA-DOA/CD74/FCGR1A/HLA-DPA1/HLA-DQA1	28
GO_CARDIAC_MUSCLE_CELL_DIFFERENTIATION	GO_CARDIAC_MUSCLE_CELL_DIFFERENTIATION	19/1098	129/18046	0.000296141	0.00358691	0.00269557	SGCD/MEF2C/IGF1/SLC8A1/MYH11/AKAP6/RGS4/GREM1/NKX2-5/FHOD3/SGCB/AGTR2/PDGFRB/TGFB1/NOX4/HAMP/MYH10/WT1/AGT	19
GO_OSTEOCLAST_DIFFERENTIATION	GO_OSTEOCLAST_DIFFERENTIATION	16/1098	99/18046	0.000300409	0.00363012	0.00272804	RASSF2/FBN1/GPR183/MAFB/NOTCH2/TYROBP/TLR4/TREM2/LILRB1/IL12B/CCR1/INPP5D/CD109/LILRB4/SLC9B2/OSCAR	16
GO_MYELOID_CELL_DIFFERENTIATION	GO_MYELOID_CELL_DIFFERENTIATION	44/1098	420/18046	0.000310115	0.00373869	0.00280964	MEF2C/IL31RA/RASSF2/PRKCB/PIP4K2A/CCL19/NCKAP1L/FBN1/GPR183/PIK3CD/IKZF1/ACTN1/EVI2B/NRROS/MAFB/ETS1/TSPAN2/CCR7/GATA3/NOTCH2/LOX/IFI16/SPI1/CD4/TGFB1/TYROBP/TLR4/JAK3/TREM2/LILRB1/IL12B/GP1BA/C1QC/CCR1/INPP5D/IL34/CD109/JAK2/LILRB4/SLC9B2/CEBPE/IL5/CD74/OSCAR	44
GO_REACTIVE_OXYGEN_SPECIES_METABOLIC_PROCESS	GO_REACTIVE_OXYGEN_SPECIES_METABOLIC_PROCESS	33/1098	286/18046	0.000310997	0.00374063	0.00281109	ATP2B4/PTGIS/BCL2/TLR6/CX3CR1/VAV1/NRROS/NOS1/SOD3/ABCD2/NCF1B/SH3PXD2B/AIF1/RAC2/P2RX7/AGTR2/PDGFRB/NCF1C/TGFB1/TYROBP/MAPT/TLR4/NCF1/ITGB2/NOX4/CYBB/DRD5/PXDN/HP/BST1/AGT/JAK2/ITGAM	33
GO_REGULATION_OF_METANEPHROS_DEVELOPMENT	GO_REGULATION_OF_METANEPHROS_DEVELOPMENT	7/1098	23/18046	0.000313274	0.00375929	0.00282511	FAT4/WWTR1/BASP1/AGTR2/WNT9B/PDGFRB/WT1	7
GO_KIDNEY_EPITHELIUM_DEVELOPMENT	GO_KIDNEY_EPITHELIUM_DEVELOPMENT	20/1098	140/18046	0.000314291	0.00376278	0.00282774	MEF2C/GLI3/BCL2/FAT4/FGF1/ADAMTS16/WWTR1/GREM1/BASP1/PECAM1/HEYL/GATA3/NOTCH2/AGTR2/WNT9B/SIX2/WT1/AGT/IRX1/FOXC2	20
GO_PHOSPHATIDYLINOSITOL_3_4_BISPHOSPHATE_BINDING	GO_PHOSPHATIDYLINOSITOL_3_4_BISPHOSPHATE_BINDING	8/1098	30/18046	0.000321537	0.00383184	0.00287963	PLEKHA2/MYO1G/ADAP2/NCF1B/NCF1C/NCF1/PLEK/PHLDA3	8
GO_PHOSPHATIDYLINOSITOL_3_KINASE_BINDING	GO_PHOSPHATIDYLINOSITOL_3_KINASE_BINDING	8/1098	30/18046	0.000321537	0.00383184	0.00287963	AXL/CORO1A/NLRC3/HCST/PDGFRB/RASD2/LCK/JAK2	8
GO_POSITIVE_REGULATION_OF_JNK_CASCADE	GO_POSITIVE_REGULATION_OF_JNK_CASCADE	20/1098	141/18046	0.000345737	0.00409698	0.00307889	RASSF2/MDFIC/PJA2/TLR6/MAP4K1/FCGR2B/CCL19/TLR9/CD27/NRK/CCR7/CCL21/CD40LG/SH3RF3/TLR4/NCF1/RASGRP1/TIAM1/BIRC7/SEMA3A	20
GO_CRANIOFACIAL_SUTURE_MORPHOGENESIS	GO_CRANIOFACIAL_SUTURE_MORPHOGENESIS	6/1098	17/18046	0.000346157	0.00409698	0.00307889	GLI3/RAB23/MMP16/FREM1/TIFAB/TWIST1	6
GO_PULMONARY_VALVE_MORPHOGENESIS	GO_PULMONARY_VALVE_MORPHOGENESIS	6/1098	17/18046	0.000346157	0.00409698	0.00307889	GJA5/ROBO1/HEYL/NOTCH2/NFATC1/TGFB2	6
GO_REGULATION_OF_MEMBRANE_POTENTIAL	GO_REGULATION_OF_MEMBRANE_POTENTIAL	45/1098	435/18046	0.000351578	0.00415167	0.00311999	MEF2C/FLNA/SLC8A1/KCNMA1/BCL2/AKAP6/RGS4/CNR2/CHRNA3/GPR88/CTNNA3/CACNA2D1/KCNA1/GJC1/SLMAP/TAC1/KCNK12/DGKI/EHD3/GJA5/TCL1A/PIEZO2/P2RX7/GRIN2A/RGS7BP/GLRA3/RELN/MAPT/CHRNB4/CHRNA6/TREM2/GJA1/CNIH2/UCN3/ADORA1/KCND2/GRIK1/GRID1/KCND3/KCNK13/NLGN4X/KCNC2/SEZ6/KCNK4/SHANK1	45
GO_REGULATION_OF_ALPHA_BETA_T_CELL_DIFFERENTIATION	GO_REGULATION_OF_ALPHA_BETA_T_CELL_DIFFERENTIATION	12/1098	63/18046	0.000360457	0.00424684	0.00319151	GLI3/CCL19/NCKAP1L/SASH3/GATA3/JAK3/CD83/IL12B/CD86/IL12RB1/NLRP3/SOCS1	12
GO_INTERLEUKIN_17_PRODUCTION	GO_INTERLEUKIN_17_PRODUCTION	9/1098	38/18046	0.000362246	0.00424861	0.00319284	RFTN1/NCKAP1L/PRNP/SLAMF6/TGFB1/TLR4/IL12B/IL21/IL6	9
GO_SEMAPHORIN_PLEXIN_SIGNALING_PATHWAY	GO_SEMAPHORIN_PLEXIN_SIGNALING_PATHWAY	9/1098	38/18046	0.000362246	0.00424861	0.00319284	FLNA/PLXNA4/NRP2/PLXNC1/NRP1/SEMA6B/SEMA3C/SEMA7A/SEMA3A	9
GO_REGULATION_OF_CELLULAR_RESPONSE_TO_TRANSFORMING_GROWTH_FACTOR_BETA_STIMULUS	GO_REGULATION_OF_CELLULAR_RESPONSE_TO_TRANSFORMING_GROWTH_FACTOR_BETA_STIMULUS	18/1098	121/18046	0.000373559	0.0043714	0.00328512	ZEB1/ASPN/LTBP1/FBN1/CHST11/NRROS/LDLRAD4/HTRA1/LOX/DKK3/ENG/NREP/DAB2/HTRA3/TGFB1/DAND5/CD109/CAV2	18
GO_CARDIAC_MUSCLE_TISSUE_DEVELOPMENT	GO_CARDIAC_MUSCLE_TISSUE_DEVELOPMENT	28/1098	231/18046	0.000390767	0.00456247	0.00342871	SGCD/MEF2C/IGF1/SLC8A1/MYH11/AKAP6/RGS4/HEG1/GREM1/GJC1/GJA5/NKX2-5/FHOD3/SGCB/AGTR2/ENG/TENM4/PDGFRB/TGFB1/NOX4/HAMP/GJA1/TGFB2/ALDH1A2/MYH10/WT1/AGT/FOXC2	28
GO_MAINTENANCE_OF_LOCATION	GO_MAINTENANCE_OF_LOCATION	37/1098	338/18046	0.000394203	0.00459225	0.00345109	HTR2A/FLNA/SLC8A1/LTBP1/AKAP6/CD19/CCL19/PLCG2/CORO1A/FBN1/CLIC2/THY1/TLN1/PTPRC/NRROS/NOS1/ABCA1/ITGB3/MSR1/CCR7/F2R/P2RX7/EPB41L3/CCL21/CD4/SRGN/CCR5/DYSF/C3/APLNR/HTR2B/APOE/LCK/DAND5/TMSB15A/IL6/SHANK1	37
GO_TERTIARY_GRANULE	GO_TERTIARY_GRANULE	22/1098	164/18046	0.000398964	0.00463729	0.00348493	DOK3/ATP8B4/NCKAP1L/TIMP2/CD53/LAIR1/CR1/CLEC4C/CHRNB4/ITGB2/SIGLEC5/CYBB/CD93/HP/FRMPD3/FPR1/TNFAIP6/OLR1/ITGAM/SIGLEC14/OSCAR/ADGRE3	22
GO_POSITIVE_REGULATION_OF_INTERLEUKIN_2_PRODUCTION	GO_POSITIVE_REGULATION_OF_INTERLEUKIN_2_PRODUCTION	8/1098	31/18046	0.000410474	0.00474977	0.00356946	SASH3/PTPRC/CD28/CD4/PDE4B/CD83/CD86/CD3E	8
GO_POSITIVE_REGULATION_OF_T_CELL_MIGRATION	GO_POSITIVE_REGULATION_OF_T_CELL_MIGRATION	8/1098	31/18046	0.000410474	0.00474977	0.00356946	AIF1/CXCL13/SPN/DOCK8/CCL21/ITGA4/CCL5/XCL2	8
GO_INTRINSIC_COMPONENT_OF_POSTSYNAPTIC_MEMBRANE	GO_INTRINSIC_COMPONENT_OF_POSTSYNAPTIC_MEMBRANE	18/1098	122/18046	0.0004138	0.00475805	0.00357569	HTR2A/SLC8A1/NRP2/KCNA1/CNTN1/GRIN2A/RGS7BP/NRP1/CHRNA6/LRRTM3/KCNA3/PCDH17/LRRC4C/CNIH2/ADORA1/KCND2/GRID1/KCND3	18
GO_TERTIARY_GRANULE_MEMBRANE	GO_TERTIARY_GRANULE_MEMBRANE	13/1098	73/18046	0.000414163	0.00475805	0.00357569	ATP8B4/CD53/LAIR1/CLEC4C/CHRNB4/ITGB2/SIGLEC5/CYBB/CD93/FRMPD3/OLR1/ITGAM/SIGLEC14	13
GO_METANEPHROS_DEVELOPMENT	GO_METANEPHROS_DEVELOPMENT	15/1098	92/18046	0.000416408	0.00475805	0.00357569	GLI3/BCL2/FAT4/WWTR1/FBN1/GREM1/BASP1/GATA3/AGTR2/WNT9B/PDGFRB/SIX2/WT1/IRX1/FOXC2	15
GO_INTEGRIN_ACTIVATION	GO_INTEGRIN_ACTIVATION	7/1098	24/18046	0.000419203	0.00475805	0.00357569	SELP/P2RY12/TLN1/CXCL13/FN1/PLEK/FERMT3	7
GO_INTRINSIC_COMPONENT_OF_EXTERNAL_SIDE_OF_PLASMA_MEMBRANE	GO_INTRINSIC_COMPONENT_OF_EXTERNAL_SIDE_OF_PLASMA_MEMBRANE	7/1098	24/18046	0.000419203	0.00475805	0.00357569	THY1/FOLR2/IGSF21/PRNP/PRND/CD14/GP1BA	7
GO_NEGATIVE_REGULATION_OF_AMINE_TRANSPORT	GO_NEGATIVE_REGULATION_OF_AMINE_TRANSPORT	7/1098	24/18046	0.000419203	0.00475805	0.00357569	SYT11/RGS4/P2RY12/SYT4/AGTR2/ADORA1/GRM7	7
GO_TOLERANCE_INDUCTION	GO_TOLERANCE_INDUCTION	7/1098	24/18046	0.000419203	0.00475805	0.00357569	CCR4/HAVCR2/CD3E/CD274/PDCD1/CLC/IDO1	7
GO_POSITIVE_REGULATION_OF_VASCULATURE_DEVELOPMENT	GO_POSITIVE_REGULATION_OF_VASCULATURE_DEVELOPMENT	28/1098	232/18046	0.000419254	0.00475805	0.00357569	PRKCB/HSPB6/PTGIS/RHOJ/FGF1/GREM1/CX3CR1/VEGFC/SFRP2/ETS1/SRPX2/C5AR1/CXCR4/RAMP2/ENG/NRP1/C3AR1/AQP1/ITGB2/CDH5/CYBB/C3/RRAS/APLNR/HDAC9/TWIST1/FOXC2/ADAM12	28
GO_REGULATION_OF_LYMPHOCYTE_MIGRATION	GO_REGULATION_OF_LYMPHOCYTE_MIGRATION	12/1098	64/18046	0.00041945	0.00475805	0.00357569	MSN/CD200/AIF1/CXCL13/SPN/CCL2/DOCK8/CCL21/ITGA4/CD200R1/CCL5/XCL2	12
GO_STRIATED_MUSCLE_CELL_DIFFERENTIATION	GO_STRIATED_MUSCLE_CELL_DIFFERENTIATION	33/1098	291/18046	0.000425586	0.00481501	0.00361849	SGCD/MEF2C/IGF1/SLC8A1/FLNC/BCL2/MYH11/AKAP6/RGS4/GREM1/CDON/EHD2/CD53/NOS1/TMEM119/NKX2-5/FHOD3/SGCB/LOX/AGTR2/PDGFRB/TGFB1/DYSF/NOX4/HAMP/HDAC9/MYH10/WT1/AGT/CAV2/ADAM12/KEL/UCHL1	33
GO_REGULATION_OF_GTPASE_ACTIVITY	GO_REGULATION_OF_GTPASE_ACTIVITY	48/1098	477/18046	0.000426329	0.00481501	0.00361849	PRKG1/ARHGAP15/ARHGDIB/RGS4/ARHGAP25/PLXNA4/CCL19/NCKAP1L/EPHA3/TBC1D1/THY1/ARHGAP31/VAV1/RHOH/DGKI/ARHGAP30/ADAP2/GPR65/TAGAP/DOCK10/ARHGAP22/CCR7/RGS18/F2R/CXCL13/RGS8/DOCK11/CCL2/DOCK8/PLXNC1/CCL21/NRP1/RGS1/CCL13/SYDE2/CHN1/HTR2B/ARHGAP23/CCL26/AGAP2/CCL22/RASGRP1/CCL5/TIAM1/CCL17/CAV2/XCL2/RASGRF1	48
GO_CELL_SUBSTRATE_JUNCTION	GO_CELL_SUBSTRATE_JUNCTION	43/1098	414/18046	0.000432987	0.00487957	0.00366701	FLNA/FLRT2/FLNC/CNN1/PARVA/LPP/VIM/MSN/LPXN/ITGA1/TNC/PPP1R12A/MRC2/THY1/ARHGAP31/TLN1/PTPRC/EHD3/ACTN1/LCP1/ITGBL1/VCL/ITGB3/ARHGAP22/RAC2/ENG/NRP1/ITGA4/DAB2/FAP/PDGFRB/SMPX/CD44/ITGB2/NOX4/FZD1/SCARF2/RRAS/GJA1/CASS4/JAK2/ITGA11/CAV2	43
GO_POSITIVE_REGULATION_OF_ALPHA_BETA_T_CELL_DIFFERENTIATION	GO_POSITIVE_REGULATION_OF_ALPHA_BETA_T_CELL_DIFFERENTIATION	10/1098	47/18046	0.000437954	0.00492484	0.00370103	GLI3/CCL19/NCKAP1L/SASH3/CD83/IL12B/CD86/IL12RB1/NLRP3/SOCS1	10
GO_POSITIVE_REGULATION_OF_GTPASE_ACTIVITY	GO_POSITIVE_REGULATION_OF_GTPASE_ACTIVITY	42/1098	402/18046	0.000444841	0.00499122	0.00375091	ARHGAP15/ARHGDIB/RGS4/ARHGAP25/CCL19/NCKAP1L/TBC1D1/THY1/ARHGAP31/VAV1/ARHGAP30/ADAP2/GPR65/TAGAP/DOCK10/ARHGAP22/CCR7/RGS18/F2R/CXCL13/RGS8/DOCK11/CCL2/DOCK8/CCL21/NRP1/RGS1/CCL13/SYDE2/CHN1/HTR2B/ARHGAP23/CCL26/AGAP2/CCL22/RASGRP1/CCL5/TIAM1/CCL17/CAV2/XCL2/RASGRF1	42
GO_REGULATION_OF_T_CELL_RECEPTOR_SIGNALING_PATHWAY	GO_REGULATION_OF_T_CELL_RECEPTOR_SIGNALING_PATHWAY	9/1098	39/18046	0.000445782	0.00499122	0.00375091	TESPA1/THY1/PVRIG/PRNP/CCR7/TRAT1/UBASH3A/LCK/LILRB4	9
GO_DEVELOPMENTAL_CELL_GROWTH	GO_DEVELOPMENTAL_CELL_GROWTH	28/1098	233/18046	0.000449556	0.00501344	0.00376761	IGF1/MAP1B/AKAP6/RGS4/PLXNA4/NRP2/SYT4/TNR/VCL/AGTR2/CXCR4/NRP1/ITGA4/ISLR2/CPNE5/MAPT/FN1/HAMP/SEMA6B/POSTN/SEMA3C/SEMA7A/APOE/AGT/TIAM1/SPP1/CPNE6/SEMA3A	28
GO_INTERLEUKIN_8_PRODUCTION	GO_INTERLEUKIN_8_PRODUCTION	14/1098	83/18046	0.000449701	0.00501344	0.00376761	SSC5D/TLR6/ELANE/TLR7/TLR9/PTPRC/TLR1/F2R/TLR4/BPI/CD14/CD2/TLR8/CD74	14
GO_REGULATION_OF_OSTEOCLAST_DEVELOPMENT	GO_REGULATION_OF_OSTEOCLAST_DEVELOPMENT	5/1098	12/18046	0.0004564	0.00506634	0.00380737	FBN1/NOTCH2/TYROBP/LILRB1/SLC9B2	5
GO_SUPEROXIDE_GENERATING_NADPH_OXIDASE_ACTIVITY	GO_SUPEROXIDE_GENERATING_NADPH_OXIDASE_ACTIVITY	5/1098	12/18046	0.0004564	0.00506634	0.00380737	NCF1B/NCF1C/NCF1/NOX4/CYBB	5
GO_CHONDROCYTE_DIFFERENTIATION	GO_CHONDROCYTE_DIFFERENTIATION	18/1098	123/18046	0.000457738	0.00507033	0.00381037	MEF2C/GLI3/COL14A1/GREM1/SFRP2/CHST11/NKX3-2/NPPC/COL6A3/GLI2/SIX2/TGFB1/SULF1/TRPS1/TGFBI/COL12A1/GDF5/MATN2	18
GO_POSITIVE_REGULATION_OF_MYELOID_CELL_DIFFERENTIATION	GO_POSITIVE_REGULATION_OF_MYELOID_CELL_DIFFERENTIATION	15/1098	93/18046	0.000469075	0.00517165	0.00388651	NCKAP1L/EVI2B/ETS1/NOTCH2/CD4/TGFB1/TYROBP/TREM2/IL12B/CCR1/INPP5D/IL34/SLC9B2/IL5/CD74	15
GO_BONE_MORPHOGENESIS	GO_BONE_MORPHOGENESIS	17/1098	113/18046	0.000470386	0.00517165	0.00388651	MEF2C/GLI3/COL14A1/RAB23/SFRP2/NPPC/TMEM119/SFRP4/COL6A3/MMP16/COL1A1/PHOSPHO1/FREM1/COL12A1/TIFAB/TWIST1/MATN2	17
GO_CARDIAC_SEPTUM_DEVELOPMENT	GO_CARDIAC_SEPTUM_DEVELOPMENT	17/1098	113/18046	0.000470386	0.00517165	0.00388651	PARVA/LTBP1/HEG1/NRP2/GJA5/ROBO1/NKX2-5/HEYL/GATA3/NOTCH2/ENG/NRP1/FZD1/TGFB2/SEMA3C/MYH10/DAND5	17
GO_NEGATIVE_REGULATION_OF_CELLULAR_RESPONSE_TO_GROWTH_FACTOR_STIMULUS	GO_NEGATIVE_REGULATION_OF_CELLULAR_RESPONSE_TO_GROWTH_FACTOR_STIMULUS	22/1098	166/18046	0.000472756	0.00517165	0.00388651	ASPN/LTBP1/FBN1/GREM1/ADGRA2/SFRP2/CHST11/NRROS/LDLRAD4/HTRA1/CXCL13/GATA3/AGTR2/HTRA3/TGFB1/FZD1/SULF1/DAND5/CD109/AGT/CAV2/GDF3	22
GO_DEFENSE_RESPONSE_TO_BACTERIUM	GO_DEFENSE_RESPONSE_TO_BACTERIUM	36/1098	329/18046	0.000472948	0.00517165	0.00388651	SSC5D/SYT11/TLR6/SELP/ELANE/MPEG1/TLR9/RNASE6/TNFSF8/CXCL13/P2RX7/LTA/NOTCH2/C5AR1/SPN/CD4/IGHV1OR15-1/TLR4/TREM2/LYPD8/HAMP/TRBC2/NLRC4/BPI/IL12B/HAVCR2/HP/AICDA/IGHG4/NLRP3/CEBPE/GBP4/IL6/RNASE3/IGHV1-69-2/IGHV3-20	36
GO_EXOGENOUS_PROTEIN_BINDING	GO_EXOGENOUS_PROTEIN_BINDING	13/1098	74/18046	0.000474908	0.00517165	0.00388651	HTR2A/AXL/ITGB3/CR1/CR2/CXCR4/CD4/CCR5/CD86/SELPLG/MRC1/CD209/ANPEP	13
GO_REGULATION_OF_BONE_MINERALIZATION	GO_REGULATION_OF_BONE_MINERALIZATION	13/1098	74/18046	0.000474908	0.00517165	0.00388651	MGP/MEF2C/SLC8A1/OMD/GREM1/TMEM119/P2RX7/TGFB1/SRGN/PHOSPHO1/CCR1/TWIST1/NELL1	13
GO_POSITIVE_REGULATION_OF_CYTOKINE_PRODUCTION_INVOLVED_IN_IMMUNE_RESPONSE	GO_POSITIVE_REGULATION_OF_CYTOKINE_PRODUCTION_INVOLVED_IN_IMMUNE_RESPONSE	11/1098	56/18046	0.000476861	0.00517165	0.00388651	SASH3/SCIMP/GATA3/TLR4/TRIM6/LILRB1/SEMA7A/NLRP3/CD74/CLNK/IL6	11
GO_POSITIVE_REGULATION_OF_PROTEIN_TYROSINE_KINASE_ACTIVITY	GO_POSITIVE_REGULATION_OF_PROTEIN_TYROSINE_KINASE_ACTIVITY	11/1098	56/18046	0.000476861	0.00517165	0.00388651	STAP1/GREM1/PRNP/RELN/NCF1/NOX4/CASS4/ADORA1/AGT/CCL5/FCGR1A	11
GO_REGULATION_OF_KIDNEY_DEVELOPMENT	GO_REGULATION_OF_KIDNEY_DEVELOPMENT	11/1098	56/18046	0.000476861	0.00517165	0.00388651	FAT4/WWTR1/GREM1/BASP1/GATA3/AGTR2/WNT9B/PDGFRB/SIX2/WT1/AGT	11
GO_RESPONSE_TO_MECHANICAL_STIMULUS	GO_RESPONSE_TO_MECHANICAL_STIMULUS	26/1098	211/18046	0.000482079	0.00521732	0.00392083	HTR2A/SLC8A1/MAP1B/NRXN2/TNC/TLR7/KCNA1/COL3A1/ETS1/PIEZO2/P2RX7/CXCR4/ENG/TLR4/AQP1/SERPINE2/COL1A1/FAS/GJA1/POSTN/AGT/GDF5/TIFAB/TLR8/KCNK4/MMP7	26
GO_AMINOGLYCAN_CATABOLIC_PROCESS	GO_AMINOGLYCAN_CATABOLIC_PROCESS	12/1098	65/18046	0.000486385	0.00525296	0.00394761	OGN/KERA/LUM/OMD/ARSB/GPC6/BGN/SDC3/VCAN/TGFB1/CD44/GPC5	12
GO_REGULATION_OF_GLIAL_CELL_MIGRATION	GO_REGULATION_OF_GLIAL_CELL_MIGRATION	6/1098	18/18046	0.000492637	0.0052984	0.00398176	STAP1/CX3CR1/P2RY12/GPR183/TREM2/TIAM1	6
GO_VOCALIZATION_BEHAVIOR	GO_VOCALIZATION_BEHAVIOR	6/1098	18/18046	0.000492637	0.0052984	0.00398176	NRXN2/NRXN3/SRPX2/TIFAB/NLGN4X/SHANK1	6
GO_REGULATION_OF_OSSIFICATION	GO_REGULATION_OF_OSSIFICATION	25/1098	200/18046	0.000495214	0.0053151	0.00399431	MGP/MEF2C/GLI3/IGF1/RASSF2/SLC8A1/BCL2/OMD/GREM1/SFRP2/TNN/TAC1/NPPC/TMEM119/P2RX7/SIX2/TGFB1/SRGN/TGFB2/PHOSPHO1/CCR1/TWIST1/CTHRC1/NELL1/IL6	25
GO_MUCOPOLYSACCHARIDE_METABOLIC_PROCESS	GO_MUCOPOLYSACCHARIDE_METABOLIC_PROCESS	17/1098	114/18046	0.000522124	0.0055834	0.00419594	OGN/KERA/LUM/OMD/CSGALNACT2/ARSB/CHST11/BGN/VCAN/TGFB1/SPOCK2/CD44/CHSY3/CHST2/CHST15/NDST4/NDNF	17
GO_APOPTOTIC_CELL_CLEARANCE	GO_APOPTOTIC_CELL_CLEARANCE	10/1098	48/18046	0.000523444	0.0055834	0.00419594	AXL/C4A/C4B/ITGB3/RAC2/CCL2/TYROBP/TREM2/C3/MEGF10	10
GO_CHEMOKINE_ACTIVITY	GO_CHEMOKINE_ACTIVITY	10/1098	48/18046	0.000523444	0.0055834	0.00419594	CCL19/CXCL13/CCL2/CCL21/CCL13/CCL26/CCL22/CCL5/CCL17/XCL2	10
GO_PURINERGIC_RECEPTOR_ACTIVITY	GO_PURINERGIC_RECEPTOR_ACTIVITY	7/1098	25/18046	0.000551893	0.00585074	0.00439685	P2RY8/GPR34/P2RY12/P2RY10/P2RX7/P2RY13/ADORA1	7
GO_REGULATION_OF_MESONEPHROS_DEVELOPMENT	GO_REGULATION_OF_MESONEPHROS_DEVELOPMENT	7/1098	25/18046	0.000551893	0.00585074	0.00439685	GREM1/BASP1/GATA3/AGTR2/SIX2/WT1/AGT	7
GO_RENAL_SYSTEM_PROCESS_INVOLVED_IN_REGULATION_OF_SYSTEMIC_ARTERIAL_BLOOD_PRESSURE	GO_RENAL_SYSTEM_PROCESS_INVOLVED_IN_REGULATION_OF_SYSTEMIC_ARTERIAL_BLOOD_PRESSURE	7/1098	25/18046	0.000551893	0.00585074	0.00439685	SUCNR1/GJA5/F2R/AGTR2/GJA1/ADORA1/AGT	7
GO_NEGATIVE_REGULATION_OF_IMMUNE_RESPONSE	GO_NEGATIVE_REGULATION_OF_IMMUNE_RESPONSE	21/1098	157/18046	0.000556277	0.00588519	0.00442273	A2M/FCRLB/FCGR2B/FGL2/COL3A1/PTPRC/NLRC3/CR1/CD84/IFI16/TGFB1/JAK3/LILRB1/IL12B/HAVCR2/TGFB2/DUSP10/SAMSN1/INPP5D/CD96/PDCD1	21
GO_MESONEPHRIC_TUBULE_MORPHOGENESIS	GO_MESONEPHRIC_TUBULE_MORPHOGENESIS	12/1098	66/18046	0.000562089	0.00593456	0.00445984	GLI3/BCL2/FAT4/FGF1/ADAMTS16/GREM1/GATA3/AGTR2/WNT9B/SIX2/WT1/AGT	12
GO_MUSCLE_ORGAN_DEVELOPMENT	GO_MUSCLE_ORGAN_DEVELOPMENT	42/1098	407/18046	0.000573205	0.00603962	0.00453879	MEF2B/SGCD/MEF2C/MYLK/IGF1/MEOX2/BCL2/AKAP6/RGS4/HEG1/GREM1/EVC/CDON/COL3A1/BASP1/HIVEP3/COL6A3/NKX2-5/SGCB/TCF23/PAX5/HEYL/MSC/LOX/ENG/TGFB1/HAMP/FZD1/GJA1/TGFB2/EOMES/HDAC9/WT1/TIFAB/ITGA11/TWIST1/MKX/FOXC2/CAV2/EGR3/KEL/MEGF10	42
GO_LYSOSOMAL_LUMEN	GO_LYSOSOMAL_LUMEN	15/1098	95/18046	0.000591661	0.00622144	0.00467543	OGN/KERA/LUM/OMD/ARSB/GPC6/CD1E/CTSK/BGN/SDC3/VCAN/PDGFRB/CTSL/CD74/GPC5	15
GO_HUMORAL_IMMUNE_RESPONSE_MEDIATED_BY_CIRCULATING_IMMUNOGLOBULIN	GO_HUMORAL_IMMUNE_RESPONSE_MEDIATED_BY_CIRCULATING_IMMUNOGLOBULIN	20/1098	147/18046	0.000598423	0.00626712	0.00470975	FCGR2B/FCER2/C4A/PTPRC/C4B/CR1/CR2/LTA/IGHV1OR15-1/C3/TRBC2/C1QA/C1QC/C1QB/IGHG4/IGKV2D-30/IGKV2-29/IGHV1-69-2/IGHV3-20/IGKV4-1	20
GO_POSITIVE_REGULATION_OF_LIPID_METABOLIC_PROCESS	GO_POSITIVE_REGULATION_OF_LIPID_METABOLIC_PROCESS	20/1098	147/18046	0.000598423	0.00626712	0.00470975	HTR2A/FGF1/CD19/CCL19/P2RY12/ABCD2/CCR7/ZBTB20/CCL21/PDGFRB/TGFB1/HTR2B/APOE/ADORA1/AGT/AGAP2/APOC1/TWIST1/CD74/APOC2	20
GO_METALLOPEPTIDASE_ACTIVITY	GO_METALLOPEPTIDASE_ACTIVITY	23/1098	180/18046	0.000599891	0.00626983	0.00471179	CPXM2/ADAMTS16/CPXM1/ADAM19/AEBP1/CPZ/VASH1/MMP2/MMP16/FAP/PAPPA/MEP1B/FOLH1/ENPEP/ADAMTS2/CPA1/PHEX/ADAM12/ADAMDEC1/KEL/ANPEP/FOLH1B/MMP7	23
GO_AMINOGLYCAN_METABOLIC_PROCESS	GO_AMINOGLYCAN_METABOLIC_PROCESS	22/1098	169/18046	0.00060571	0.00631791	0.00474793	OGN/KERA/LUM/OMD/CSGALNACT2/ARSB/GPC6/CHST11/BGN/SDC3/VCAN/PDGFRB/TGFB1/SPOCK2/CD44/CHSY3/CHST2/CHST15/GPC5/NDST4/NDNF/HS3ST2	22
GO_POSITIVE_REGULATION_OF_ESTABLISHMENT_OF_PROTEIN_LOCALIZATION	GO_POSITIVE_REGULATION_OF_ESTABLISHMENT_OF_PROTEIN_LOCALIZATION	46/1098	459/18046	0.000607675	0.00632568	0.00475376	GLI3/IGF1/FLNA/BCL2/CCL19/VEGFC/PRNP/TLR1/CLEC9A/F2R/AIF1/RAC2/GATA3/P2RX7/AGTR2/TGFB1/TLR4/TREM2/TRIM6/ITGB2/GJA1/CRLF2/ABLIM3/CD14/HAVCR2/TGFB2/POSTN/CD2/MYH10/HTR2B/UCN3/CRTAM/JAK2/CD274/RASGRP1/NLRP3/TWIST1/TLR8/IL5/CD38/ITGAM/DOC2B/IL6/AIM2/GIP/GCG	46
GO_POSITIVE_REGULATION_OF_INTERLEUKIN_8_PRODUCTION	GO_POSITIVE_REGULATION_OF_INTERLEUKIN_8_PRODUCTION	10/1098	49/18046	0.000622302	0.00645202	0.00484871	ELANE/TLR7/TLR9/TLR1/F2R/TLR4/CD14/CD2/TLR8/CD74	10
GO_T_CELL_APOPTOTIC_PROCESS	GO_T_CELL_APOPTOTIC_PROCESS	10/1098	49/18046	0.000622302	0.00645202	0.00484871	GLI3/CD27/DOCK8/JAK3/PTCRA/CD274/CCL5/PDCD1/CLC/IDO1	10
GO_CALCIUM_ION_TRANSMEMBRANE_TRANSPORT	GO_CALCIUM_ION_TRANSMEMBRANE_TRANSPORT	36/1098	334/18046	0.000626348	0.00648102	0.0048705	HTR2A/SLC8A1/ATP2B4/AKAP6/CD19/PIK3CG/CCL19/PLCG2/CORO1A/NCS1/CLIC2/TLR9/P2RY12/THY1/CACNA2D1/PRNP/PTPRC/REM1/EHD3/NOS1/CALHM1/SLC24A3/CCR7/F2R/P2RX7/GRIN2A/CCL21/STAC/PDE4B/CCR5/DYSF/APLNR/IL1RAPL1/HTR2B/LCK/CATSPER1	36
GO_LONG_TERM_MEMORY	GO_LONG_TERM_MEMORY	8/1098	33/18046	0.000648185	0.0066803	0.00502026	PJA2/PRNP/TAC1/RELN/APOE/RASGRF1/LRRN4/SHANK1	8
GO_VASODILATION	GO_VASODILATION	8/1098	33/18046	0.000648185	0.0066803	0.00502026	KCNMA1/PRKG1/ITGA1/NOS1/AGTR2/APOE/ADORA1/AGT	8
GO_NEURAL_CREST_CELL_DIFFERENTIATION	GO_NEURAL_CREST_CELL_DIFFERENTIATION	14/1098	86/18046	0.000651278	0.00669885	0.00503421	MEF2C/NRP2/EDNRA/FRZB/NRP1/FN1/SEMA6B/ALDH1A2/SEMA3C/SEMA7A/HTR2B/TWIST1/FOXC2/SEMA3A	14
GO_POSITIVE_REGULATION_OF_CARDIOCYTE_DIFFERENTIATION	GO_POSITIVE_REGULATION_OF_CARDIOCYTE_DIFFERENTIATION	9/1098	41/18046	0.000660478	0.00678004	0.00509521	MEF2C/IGF1/AKAP6/GREM1/NKX2-5/TGFB1/HAMP/TGFB2/SEMA3C	9
GO_BLASTODERM_SEGMENTATION	GO_BLASTODERM_SEGMENTATION	6/1098	19/18046	0.00068317	0.00695786	0.00522885	NRP2/BASP1/NRP1/WT1/TIFAB/SEMA3A	6
GO_NEGATIVE_REGULATION_OF_NEUROINFLAMMATORY_RESPONSE	GO_NEGATIVE_REGULATION_OF_NEUROINFLAMMATORY_RESPONSE	6/1098	19/18046	0.00068317	0.00695786	0.00522885	IGF1/SYT11/PTPRC/CD200/CD200R1/CST7	6
GO_NEGATIVE_REGULATION_OF_T_CELL_APOPTOTIC_PROCESS	GO_NEGATIVE_REGULATION_OF_T_CELL_APOPTOTIC_PROCESS	6/1098	19/18046	0.00068317	0.00695786	0.00522885	CD27/DOCK8/JAK3/PTCRA/CCL5/IDO1	6
GO_POSITIVE_REGULATION_OF_HUMORAL_IMMUNE_RESPONSE	GO_POSITIVE_REGULATION_OF_HUMORAL_IMMUNE_RESPONSE	6/1098	19/18046	0.00068317	0.00695786	0.00522885	FCGR2B/FCER2/PTPRC/CCR7/LTA/C3	6
GO_REGULATION_OF_BLOOD_CIRCULATION	GO_REGULATION_OF_BLOOD_CIRCULATION	33/1098	299/18046	0.000687507	0.0069883	0.00525173	HTR2A/FLNA/SLC8A1/ATP2B4/RGS4/ABCC9/PIK3CG/CLIC2/CTNNA3/KCNIP1/CACNA2D1/GJC1/TAC1/EHD3/SPX/NPPC/GJA5/NOS1/NKX2-5/PDE5A/FXYD2/F2R/AGTR2/PDE4B/GJA1/TGFB2/ADORA1/KCND2/AGT/JAK2/KCND3/CD38/SEMA3A	33
GO_CELL_TRAILING_EDGE	GO_CELL_TRAILING_EDGE	5/1098	13/18046	0.000704606	0.0070515	0.00529922	MSN/SCIMP/SPN/SELPLG/BST1	5
GO_G_PROTEIN_COUPLED_NUCLEOTIDE_RECEPTOR_ACTIVITY	GO_G_PROTEIN_COUPLED_NUCLEOTIDE_RECEPTOR_ACTIVITY	5/1098	13/18046	0.000704606	0.0070515	0.00529922	P2RY8/GPR34/P2RY12/P2RY10/P2RY13	5
GO_G_PROTEIN_COUPLED_PURINERGIC_NUCLEOTIDE_RECEPTOR_SIGNALING_PATHWAY	GO_G_PROTEIN_COUPLED_PURINERGIC_NUCLEOTIDE_RECEPTOR_SIGNALING_PATHWAY	5/1098	13/18046	0.000704606	0.0070515	0.00529922	P2RY8/GPR34/P2RY12/P2RY10/P2RY13	5
GO_MACROPHAGE_ACTIVATION_INVOLVED_IN_IMMUNE_RESPONSE	GO_MACROPHAGE_ACTIVATION_INVOLVED_IN_IMMUNE_RESPONSE	5/1098	13/18046	0.000704606	0.0070515	0.00529922	SUCNR1/TYROBP/TREM2/DYSF/HAVCR2	5
GO_NEGATIVE_REGULATION_OF_LONG_TERM_SYNAPTIC_POTENTIATION	GO_NEGATIVE_REGULATION_OF_LONG_TERM_SYNAPTIC_POTENTIATION	5/1098	13/18046	0.000704606	0.0070515	0.00529922	CX3CR1/PRNP/TYROBP/APOE/ADORA1	5
GO_POSITIVE_REGULATION_OF_PHAGOCYTOSIS_ENGULFMENT	GO_POSITIVE_REGULATION_OF_PHAGOCYTOSIS_ENGULFMENT	5/1098	13/18046	0.000704606	0.0070515	0.00529922	STAP1/NCKAP1L/RAB31/TREM2/C3	5
GO_POSITIVE_THYMIC_T_CELL_SELECTION	GO_POSITIVE_THYMIC_T_CELL_SELECTION	5/1098	13/18046	0.000704606	0.0070515	0.00529922	PTPRC/CD3G/CD3D/CD3E/CD74	5
GO_SEMAPHORIN_PLEXIN_SIGNALING_PATHWAY_INVOLVED_IN_NEURON_PROJECTION_GUIDANCE	GO_SEMAPHORIN_PLEXIN_SIGNALING_PATHWAY_INVOLVED_IN_NEURON_PROJECTION_GUIDANCE	5/1098	13/18046	0.000704606	0.0070515	0.00529922	PLXNA4/NRP2/PLXNC1/NRP1/SEMA3A	5
GO_ENDOCYTIC_VESICLE_MEMBRANE	GO_ENDOCYTIC_VESICLE_MEMBRANE	21/1098	160/18046	0.000715767	0.00712341	0.00535326	RAB23/HVCN1/TLR6/CORO1A/RAB31/RAB8B/TLR1/MSR1/CD207/RAC2/CYBB/HLA-DQA2/TYRP1/HLA-DQB2/APOE/HLA-DPB1/HLA-DRA/CD74/FCGR1A/HLA-DPA1/HLA-DQA1	21
GO_LUMENAL_SIDE_OF_ENDOPLASMIC_RETICULUM_MEMBRANE	GO_LUMENAL_SIDE_OF_ENDOPLASMIC_RETICULUM_MEMBRANE	7/1098	26/18046	0.000715914	0.00712341	0.00535326	HLA-DQA2/HLA-DQB2/HLA-DPB1/HLA-DRA/CD74/HLA-DPA1/HLA-DQA1	7
GO_SYNAPSE_MATURATION	GO_SYNAPSE_MATURATION	7/1098	26/18046	0.000715914	0.00712341	0.00535326	CX3CR1/IGSF21/SEZ6L/NFIA/RELN/SEZ6/SHANK1	7
GO_POSITIVE_REGULATION_OF_EPITHELIAL_TO_MESENCHYMAL_TRANSITION	GO_POSITIVE_REGULATION_OF_EPITHELIAL_TO_MESENCHYMAL_TRANSITION	10/1098	50/18046	0.000736081	0.00729607	0.00548302	WWTR1/ENG/DAB2/TGFB1/COL1A1/TGFB2/CRB2/TWIST1/TIAM1/IL6	10
GO_POSITIVE_REGULATION_OF_T_CELL_MEDIATED_IMMUNITY	GO_POSITIVE_REGULATION_OF_T_CELL_MEDIATED_IMMUNITY	10/1098	50/18046	0.000736081	0.00729607	0.00548302	CD1C/SASH3/PTPRC/CD1E/GATA3/P2RX7/IL12B/IL12RB1/NLRP3/IL6	10
GO_AORTA_DEVELOPMENT	GO_AORTA_DEVELOPMENT	11/1098	59/18046	0.000758485	0.0074895	0.00562838	MYLK/PRICKLE1/LTBP1/COL3A1/ROBO1/LOXL1/LOX/ENG/PDGFRB/TGFB2/MYH10	11
GO_LIPOPOLYSACCHARIDE_MEDIATED_SIGNALING_PATHWAY	GO_LIPOPOLYSACCHARIDE_MEDIATED_SIGNALING_PATHWAY	11/1098	59/18046	0.000758485	0.0074895	0.00562838	LY86/SCIMP/CD180/LY96/CCL2/CD6/TGFB1/TLR4/BPI/CD14/CCL5	11
GO_TOLL_LIKE_RECEPTOR_SIGNALING_PATHWAY	GO_TOLL_LIKE_RECEPTOR_SIGNALING_PATHWAY	20/1098	150/18046	0.000776049	0.00764836	0.00574777	RFTN1/TLR10/PJA2/TLR6/FCRL3/LILRA4/SCIMP/TLR7/TLR9/TLR1/CTSK/LY96/TLR4/ITGB2/CTSL/CD14/HAVCR2/TRIL/TLR8/ITGAM	20
GO_REGULATION_OF_NEUROINFLAMMATORY_RESPONSE	GO_REGULATION_OF_NEUROINFLAMMATORY_RESPONSE	9/1098	42/18046	0.000795833	0.00782846	0.00588311	IGF1/SYT11/STAP1/PTPRC/CD200/CD200R1/TREM2/IL6/CST7	9
GO_POSITIVE_REGULATION_OF_BMP_SIGNALING_PATHWAY	GO_POSITIVE_REGULATION_OF_BMP_SIGNALING_PATHWAY	8/1098	34/18046	0.000802945	0.00783892	0.00589097	RNF165/ZNF423/NOTCH2/ENG/CDH5/SULF1/CRB2/GDF5	8
GO_REGULATION_OF_T_CELL_APOPTOTIC_PROCESS	GO_REGULATION_OF_T_CELL_APOPTOTIC_PROCESS	8/1098	34/18046	0.000802945	0.00783892	0.00589097	CD27/DOCK8/JAK3/PTCRA/CD274/CCL5/PDCD1/IDO1	8
GO_REGULATION_OF_T_CELL_MEDIATED_CYTOTOXICITY	GO_REGULATION_OF_T_CELL_MEDIATED_CYTOTOXICITY	8/1098	34/18046	0.000802945	0.00783892	0.00589097	CD1C/FCGR2B/PTPRC/CD1E/P2RX7/LILRB1/IL12B/IL12RB1	8
GO_TUMOR_NECROSIS_FACTOR_BIOSYNTHETIC_PROCESS	GO_TUMOR_NECROSIS_FACTOR_BIOSYNTHETIC_PROCESS	8/1098	34/18046	0.000802945	0.00783892	0.00589097	CX3CR1/TLR1/SPN/TYROBP/TLR4/CYBB/LILRB1/JAK2	8
GO_POSITIVE_REGULATION_OF_OSSIFICATION	GO_POSITIVE_REGULATION_OF_OSSIFICATION	14/1098	88/18046	0.000824429	0.00803353	0.00603722	MEF2C/GLI3/IGF1/SLC8A1/SFRP2/TAC1/NPPC/TMEM119/P2RX7/TGFB1/TGFB2/CTHRC1/NELL1/IL6	14
GO_POSITIVE_REGULATION_OF_INTERLEUKIN_6_PRODUCTION	GO_POSITIVE_REGULATION_OF_INTERLEUKIN_6_PRODUCTION	15/1098	98/18046	0.000826186	0.00803555	0.00603873	TLR6/SCIMP/TLR7/TLR9/TLR1/F2R/AIF1/P2RX7/ZBTB20/TYROBP/TLR4/TWIST1/TLR8/CD74/IL6	15
GO_BIOMINERALIZATION	GO_BIOMINERALIZATION	21/1098	162/18046	0.000842833	0.00816681	0.00613738	MGP/MEF2C/IGF1/SLC8A1/ASPN/OMD/GREM1/TMEM119/P2RX7/LOX/COL1A2/GPNMB/TGFB1/SRGN/COL1A1/PHOSPHO1/CCR1/TWIST1/SPP1/NELL1/PHEX	21
GO_GROWTH_FACTOR_ACTIVITY	GO_GROWTH_FACTOR_ACTIVITY	21/1098	162/18046	0.000842833	0.00816681	0.00613738	IGF1/OGN/FGF7/THBS4/FGF1/VEGFC/CLEC11A/BMP3/TIMP1/FGF5/TGFB1/LEFTY2/IL12B/TGFB2/IL34/AGT/GDF5/IL5/IL6/GDF3/NRG3	21
GO_MEMORY	GO_MEMORY	17/1098	119/18046	0.000860611	0.00832352	0.00625515	HTR2A/MAP1A/SYT11/PJA2/CX3CR1/SYT4/PRNP/TAC1/GRIN2A/RELN/MAPT/APOE/RASGRF1/KCNK4/LRRN4/GIP/SHANK1	17
GO_POSITIVE_REGULATION_OF_CELL_PROJECTION_ORGANIZATION	GO_POSITIVE_REGULATION_OF_CELL_PROJECTION_ORGANIZATION	40/1098	390/18046	0.000862662	0.00832782	0.00625838	DPYSL3/CDC42EP3/MAP1B/ZNF804A/PLXNA4/CCL19/EPHA3/ARSB/P2RY12/SYT4/NGFR/RAB8B/CNTN1/ROBO1/CCR7/RAC2/P2RX7/DOCK11/CXCR4/PLXNC1/CCL21/RELN/NRP1/ISLR2/CPNE5/MAPT/FN1/CAMK1D/FZD1/IL1RAPL1/SEMA7A/CCDC88A/APOE/AGT/TIAM1/CPNE6/TENM2/TENM3/SHANK1/NDNF	40
GO_EPITHELIAL_CELL_PROLIFERATION	GO_EPITHELIAL_CELL_PROLIFERATION	44/1098	441/18046	0.000865648	0.00834111	0.00626837	MEF2C/IGF1/FGF7/THBS4/FGF1/NRP2/COL8A1/VEGFC/SFRP2/NGFR/IGFBP4/NLRC3/ITGB3/VASH1/ROBO1/HTRA1/SPARC/GATA3/NOTCH2/C5AR1/CCL2/NRP1/ITGA4/CYP7B1/FAP/TGFB1/TLR4/DYSF/SULF1/GJA1/TGFB2/APLNR/DUSP10/ALDH1A2/HTR2B/APOE/CCL26/CD109/GDF5/CCL5/TWIST1/SCG2/CAV2/EGR3	44
GO_NEGATIVE_REGULATION_OF_SECRETION	GO_NEGATIVE_REGULATION_OF_SECRETION	28/1098	243/18046	0.000875956	0.00841841	0.00632646	SSC5D/CD22/SYT11/TLR6/TACR2/FCGR2B/P2RY12/SYT4/CD200/SPX/BANK1/F2R/AGTR2/CD84/SRGN/CD200R1/FN1/GJA1/LILRB1/IL1RAPL1/HDAC9/APOE/ADORA1/TIFAB/NLRP3/TLR8/CD74/GRM7	28
GO_PLATELET_AGGREGATION	GO_PLATELET_AGGREGATION	11/1098	60/18046	0.000878542	0.00841841	0.00632646	FLNA/PRKG1/PIK3CG/P2RY12/TLN1/VCL/ITGB3/SERPINE2/PLEK/GP1BA/FERMT3	11
GO_POSITIVE_REGULATION_OF_BLOOD_VESSEL_DIAMETER	GO_POSITIVE_REGULATION_OF_BLOOD_VESSEL_DIAMETER	11/1098	60/18046	0.000878542	0.00841841	0.00632646	KCNMA1/PRKG1/ITGA1/NPPC/GJA5/NOS1/AGTR2/GJA1/APOE/ADORA1/AGT	11
GO_CARDIAC_CHAMBER_MORPHOGENESIS	GO_CARDIAC_CHAMBER_MORPHOGENESIS	18/1098	130/18046	0.000894058	0.00855128	0.00642631	MEF2C/PARVA/HEG1/NRP2/SFRP2/GJA5/ROBO1/NKX2-5/HEYL/GATA3/NOTCH2/ENG/NRP1/TGFB1/FZD1/TGFB2/SEMA3C/FOXC2	18
GO_ACUTE_INFLAMMATORY_RESPONSE	GO_ACUTE_INFLAMMATORY_RESPONSE	16/1098	109/18046	0.000896904	0.00856271	0.0064349	IL31RA/FCGR2B/PIK3CG/ELANE/TAC1/VCAM1/CCR7/GATA3/CD6/FN1/HAMP/C3/HP/ADORA1/NLRP3/IL6	16
GO_NERVE_DEVELOPMENT	GO_NERVE_DEVELOPMENT	13/1098	79/18046	0.000904015	0.00861473	0.00647399	GLI3/PLXNA4/NRP2/RNF165/MAFB/VCAM1/NPTX1/NRP1/ITGA4/SERPINE2/SULF1/TIFAB/SEMA3A	13
GO_REGULATION_OF_CALCIUM_MEDIATED_SIGNALING	GO_REGULATION_OF_CALCIUM_MEDIATED_SIGNALING	15/1098	99/18046	0.000920074	0.00869716	0.00653594	IGF1/CD22/ATP2B4/AKAP6/CLIC2/PRNP/NOS1/CD4/MAPT/TRAT1/TREM2/CMKLR1/PLEK/BST1/CD3E	15
GO_POSITIVE_REGULATION_OF_PHOSPHATIDYLINOSITOL_3_KINASE_SIGNALING	GO_POSITIVE_REGULATION_OF_PHOSPHATIDYLINOSITOL_3_KINASE_SIGNALING	14/1098	89/18046	0.000924628	0.00869716	0.00653594	IGF1/PIK3CG/SELP/PIK3CD/CD28/F2R/HCST/RELN/PDGFRB/NCF1/TGFB2/AGT/JAK2/CCL5	14
GO_REGULATION_OF_TISSUE_REMODELING	GO_REGULATION_OF_TISSUE_REMODELING	14/1098	89/18046	0.000924628	0.00869716	0.00653594	THBS4/GREM1/TMEM119/ITGB3/P2RX7/GPNMB/TGFB1/IL12B/INPP5D/IL21/AGT/SPP1/CD38/IL6	14
GO_CD4_POSITIVE_OR_CD8_POSITIVE_ALPHA_BETA_T_CELL_LINEAGE_COMMITMENT	GO_CD4_POSITIVE_OR_CD8_POSITIVE_ALPHA_BETA_T_CELL_LINEAGE_COMMITMENT	6/1098	20/18046	0.000926086	0.00869716	0.00653594	BCL2/SLAMF6/SPN/IL12B/IL12RB1/IL6	6
GO_INTERLEUKIN_8_BIOSYNTHETIC_PROCESS	GO_INTERLEUKIN_8_BIOSYNTHETIC_PROCESS	6/1098	20/18046	0.000926086	0.00869716	0.00653594	ELANE/TLR7/TLR9/TLR4/TLR8/CD74	6
GO_MESENCHYMAL_TO_EPITHELIAL_TRANSITION	GO_MESENCHYMAL_TO_EPITHELIAL_TRANSITION	6/1098	20/18046	0.000926086	0.00869716	0.00653594	GREM1/BASP1/GATA3/WNT9B/SIX2/WT1	6
GO_NUCLEOTIDE_RECEPTOR_ACTIVITY	GO_NUCLEOTIDE_RECEPTOR_ACTIVITY	6/1098	20/18046	0.000926086	0.00869716	0.00653594	P2RY8/GPR34/P2RY12/P2RY10/P2RX7/P2RY13	6
GO_POSITIVE_REGULATION_OF_TUMOR_NECROSIS_FACTOR_BIOSYNTHETIC_PROCESS	GO_POSITIVE_REGULATION_OF_TUMOR_NECROSIS_FACTOR_BIOSYNTHETIC_PROCESS	6/1098	20/18046	0.000926086	0.00869716	0.00653594	TLR1/SPN/TYROBP/TLR4/CYBB/JAK2	6
GO_G_PROTEIN_COUPLED_RECEPTOR_BINDING	GO_G_PROTEIN_COUPLED_RECEPTOR_BINDING	31/1098	280/18046	0.000934492	0.00876023	0.00658334	FLNA/CCL19/PENK/PRNP/TAC1/PTCH2/UTS2B/CXCL13/CCL2/WNT9B/CCL21/PMCH/FZD1/C3/CCL13/UCN3/ADORA1/CCL26/AGT/JAK2/CCL22/FPR1/CCL5/CCL17/CTHRC1/GNA14/XCL2/PYY/SHANK1/UCHL1/GCG	31
GO_G_PROTEIN_COUPLED_RECEPTOR_SIGNALING_PATHWAY_COUPLED_TO_CYCLIC_NUCLEOTIDE_SECOND_MESSENGER	GO_G_PROTEIN_COUPLED_RECEPTOR_SIGNALING_PATHWAY_COUPLED_TO_CYCLIC_NUCLEOTIDE_SECOND_MESSENGER	29/1098	256/18046	0.000938532	0.00878222	0.00659986	HTR2A/FLNA/GNG2/ATP2B4/CNR2/EDNRA/P2RY12/S1PR3/GPR65/NOS1/ABCA1/AGTR2/RAMP2/CCL2/GPR176/RGS1/DRD5/CALCRL/CCR1/HTR2B/UCN3/ADORA1/AGT/NPR3/FPR1/GNA14/GRM7/ADGRE3/GCG	29
GO_REGULATION_OF_CATION_CHANNEL_ACTIVITY	GO_REGULATION_OF_CATION_CHANNEL_ACTIVITY	23/1098	186/18046	0.000947256	0.00884789	0.00664921	MEF2C/AKAP6/PLCG2/CLIC2/CACNA2D1/KCNA1/SLMAP/REM1/EHD3/SHISA8/NOS1/GRIN2A/CCL2/RELN/STAC/PDE4B/TREM2/DYSF/LRRC55/CNIH2/KCNC2/RASGRF1/SHANK1	23
GO_POSITIVE_REGULATION_OF_STRESS_ACTIVATED_PROTEIN_KINASE_SIGNALING_CASCADE	GO_POSITIVE_REGULATION_OF_STRESS_ACTIVATED_PROTEIN_KINASE_SIGNALING_CASCADE	22/1098	175/18046	0.000971565	0.00905862	0.00680758	RASSF2/MDFIC/PJA2/TLR6/MAP4K1/FCGR2B/CCL19/SCIMP/TLR9/CD27/NRK/CCR7/CCL21/CD40LG/SH3RF3/TLR4/NCF1/TGFB2/RASGRP1/TIAM1/BIRC7/SEMA3A	22
GO_REGULATION_OF_RENAL_SYSTEM_PROCESS	GO_REGULATION_OF_RENAL_SYSTEM_PROCESS	8/1098	35/18046	0.000986035	0.00917703	0.00689656	TAC1/SPX/GJA5/F2R/AGTR2/GJA1/ADORA1/AGT	8
GO_POTASSIUM_ION_TRANSPORT	GO_POTASSIUM_ION_TRANSPORT	28/1098	245/18046	0.000994533	0.00923953	0.00694353	HTR2A/FLNA/KCNN3/KCNMA1/AKAP6/RGS4/ABCC9/KCNIP1/P2RY12/KCNA1/PRNP/KCNK12/GJA5/NOS1/FXYD2/SLC24A3/AQP1/TREM2/LRRC55/KCNA3/ADORA1/KCND2/KCND3/KCNK13/KCNC2/KEL/KCNK4/KCNA6	28
GO_NEGATIVE_REGULATION_OF_INTERLEUKIN_6_PRODUCTION	GO_NEGATIVE_REGULATION_OF_INTERLEUKIN_6_PRODUCTION	11/1098	61/18046	0.0010139	0.00938584	0.00705348	SYT11/NCKAP1L/TLR9/CD200/NLRC3/BANK1/TLR4/CD200R1/BPI/HAVCR2/INPP5D	11
GO_NEGATIVE_REGULATION_OF_T_CELL_PROLIFERATION	GO_NEGATIVE_REGULATION_OF_T_CELL_PROLIFERATION	11/1098	61/18046	0.0010139	0.00938584	0.00705348	PRNP/PDE5A/SPN/GPNMB/PDCD1LG2/LILRB1/CD86/HAVCR2/PLA2G2D/CD274/IDO1	11
GO_SEGMENTATION	GO_SEGMENTATION	15/1098	100/18046	0.00102283	0.00945159	0.00710289	MEOX2/NRP2/SFRP2/BASP1/MAFB/NRP1/ALDH1A2/SEMA3C/CRB2/WT1/IRX1/TIFAB/FOXC2/GDF3/SEMA3A	15
GO_REGULATION_OF_EPITHELIAL_TO_MESENCHYMAL_TRANSITION	GO_REGULATION_OF_EPITHELIAL_TO_MESENCHYMAL_TRANSITION	14/1098	90/18046	0.00103488	0.00952132	0.0071553	WWTR1/EPHA3/GREM1/SFRP2/LDLRAD4/ENG/DAB2/TGFB1/COL1A1/TGFB2/CRB2/TWIST1/TIAM1/IL6	14
GO_FORMATION_OF_PRIMARY_GERM_LAYER	GO_FORMATION_OF_PRIMARY_GERM_LAYER	17/1098	121/18046	0.00104082	0.00952132	0.0071553	COL8A1/SFRP2/ITGB3/MMP2/COL5A1/ITGA4/SIX2/FN1/ITGB2/COL4A2/GJA1/EOMES/COL5A2/CRB2/COL12A1/MIXL1/FOXC2	17
GO_AXOLEMMA	GO_AXOLEMMA	5/1098	14/18046	0.00104139	0.00952132	0.0071553	THY1/EPB41L3/MAPT/ADORA1/KCNC2	5
GO_DETECTION_OF_OTHER_ORGANISM	GO_DETECTION_OF_OTHER_ORGANISM	5/1098	14/18046	0.00104139	0.00952132	0.0071553	SSC5D/TLR6/TLR1/TLR4/NLRC4	5
GO_NLRP3_INFLAMMASOME_COMPLEX_ASSEMBLY	GO_NLRP3_INFLAMMASOME_COMPLEX_ASSEMBLY	5/1098	14/18046	0.00104139	0.00952132	0.0071553	TLR6/NLRC3/TLR4/NLRP3/GBP5	5
GO_POSITIVE_REGULATION_OF_INTERLEUKIN_2_BIOSYNTHETIC_PROCESS	GO_POSITIVE_REGULATION_OF_INTERLEUKIN_2_BIOSYNTHETIC_PROCESS	5/1098	14/18046	0.00104139	0.00952132	0.0071553	PTPRC/CD28/CD4/CD86/CD3E	5
GO_SENSORY_SYSTEM_DEVELOPMENT	GO_SENSORY_SYSTEM_DEVELOPMENT	38/1098	369/18046	0.00106467	0.00971696	0.00730232	GLI3/ZEB1/ATP2B4/RHOJ/KERA/BCL2/VIM/MAB21L2/FBN1/COL8A1/P2RY12/THY1/CDON/CRYBB1/DCX/SH3PXD2B/GATA3/ALDH1A3/NOTCH2/WNT9B/COL5A1/NRP1/PDGFRB/C3/TGFB2/ALDH1A2/COL5A2/C1QA/MYH10/WT1/MFRP/TWIST1/ITGAM/FOXC2/GDF3/CRB1/SEMA3A/TENM3	38
GO_REGULATION_OF_SYNAPTIC_TRANSMISSION_GLUTAMATERGIC	GO_REGULATION_OF_SYNAPTIC_TRANSMISSION_GLUTAMATERGIC	12/1098	71/18046	0.00110521	0.0100693	0.00756709	MEF2C/HTR2A/DGKI/TNR/CCL2/RELN/SERPINE2/KMO/ADORA1/GRIK1/GRM7/SHANK1	12
GO_STRIATED_MUSCLE_CONTRACTION	GO_STRIATED_MUSCLE_CONTRACTION	22/1098	177/18046	0.00112988	0.010276	0.00772243	SGCD/FLNA/SLC8A1/SYNM/PIK3CG/CLIC2/CTNNA3/CACNA2D1/GJC1/EHD3/GJA5/NOS1/MYBPH/NKX2-5/PDE5A/CXCR4/STAC/PDE4B/SMPX/GJA1/ADORA1/KCND3	22
GO_CHONDROITIN_SULFATE_PROTEOGLYCAN_METABOLIC_PROCESS	GO_CHONDROITIN_SULFATE_PROTEOGLYCAN_METABOLIC_PROCESS	9/1098	44/18046	0.00113424	0.0102796	0.00772514	CSGALNACT2/ARSB/CHST11/BGN/VCAN/SPOCK2/CHSY3/CHST15/NDNF	9
GO_MACROPHAGE_DIFFERENTIATION	GO_MACROPHAGE_DIFFERENTIATION	9/1098	44/18046	0.00113424	0.0102796	0.00772514	IL31RA/NRROS/TSPAN2/SPI1/CD4/TGFB1/C1QC/IL34/CEBPE	9
GO_RAS_PROTEIN_SIGNAL_TRANSDUCTION	GO_RAS_PROTEIN_SIGNAL_TRANSDUCTION	44/1098	447/18046	0.00113714	0.0102878	0.00773132	IGF1/P2RY8/RAB23/CDC42EP3/DOK3/RHOJ/ARHGDIB/LPAR4/WAS/HEG1/ELMO1/RAB31/GPR18/TIMP2/VAV1/COL3A1/RHOH/RAB33A/NGFR/DGKI/RAB8B/GPR65/RAB30/P2RY10/ABCA1/ROBO1/PECAM1/F2R/AIF1/RAC2/NOTCH2/COL1A2/NRP1/PDGFRB/GRAP/RRAS/RASGRF2/DOK2/TGFB2/APOE/JAK2/RASGRP1/TIAM1/RASGRF1	44
GO_SPECIFIC_GRANULE_MEMBRANE	GO_SPECIFIC_GRANULE_MEMBRANE	14/1098	91/18046	0.00115597	0.0104237	0.00783344	HVCN1/ATP8B4/CD53/LAIR1/SLC2A5/ITGAL/C3AR1/CHRNB4/ITGB2/CYBB/CD93/BST1/OLR1/ITGAM	14
GO_INTRINSIC_COMPONENT_OF_SYNAPTIC_MEMBRANE	GO_INTRINSIC_COMPONENT_OF_SYNAPTIC_MEMBRANE	21/1098	166/18046	0.0011562	0.0104237	0.00783344	HTR2A/SLC8A1/ATP2B4/SYT11/NRP2/KCNA1/CNTN1/GRIN2A/RGS7BP/NRP1/NTNG2/CHRNA6/LRRTM3/KCNA3/PCDH17/LRRC4C/CNIH2/ADORA1/KCND2/GRID1/KCND3	21
GO_POSITIVE_REGULATION_OF_LEUKOCYTE_APOPTOTIC_PROCESS	GO_POSITIVE_REGULATION_OF_LEUKOCYTE_APOPTOTIC_PROCESS	7/1098	28/18046	0.00115819	0.0104237	0.00783344	MEF2C/PIK3CD/P2RX7/CD274/CCL5/PDCD1/IDO1	7
GO_METALLOEXOPEPTIDASE_ACTIVITY	GO_METALLOEXOPEPTIDASE_ACTIVITY	11/1098	62/18046	0.00116602	0.010476	0.00787273	CPXM2/CPXM1/AEBP1/CPZ/VASH1/MMP16/FOLH1/ENPEP/CPA1/ANPEP/FOLH1B	11
GO_GROWTH_FACTOR_RECEPTOR_BINDING	GO_GROWTH_FACTOR_RECEPTOR_BINDING	18/1098	133/18046	0.00116925	0.0104868	0.00788087	FLRT2/FGF7/FGF1/MS4A1/GREM1/TLR9/VEGFC/ITGB3/GATA3/FGF5/PDGFRB/CDH5/IL12B/IL12RB1/IL21/JAK2/IL5/IL6	18
GO_REGULATION_OF_POSTSYNAPTIC_MEMBRANE_POTENTIAL	GO_REGULATION_OF_POSTSYNAPTIC_MEMBRANE_POTENTIAL	19/1098	144/18046	0.00117852	0.0105517	0.00792965	MEF2C/RGS4/CHRNA3/KCNA1/DGKI/P2RX7/GRIN2A/RGS7BP/GLRA3/RELN/CHRNB4/CHRNA6/ADORA1/KCND2/GRIK1/GRID1/NLGN4X/SEZ6/SHANK1	19
GO_NEGATIVE_REGULATION_OF_PRODUCTION_OF_MOLECULAR_MEDIATOR_OF_IMMUNE_RESPONSE	GO_NEGATIVE_REGULATION_OF_PRODUCTION_OF_MOLECULAR_MEDIATOR_OF_IMMUNE_RESPONSE	8/1098	36/18046	0.00120105	0.0107164	0.0080534	CD22/FCGR2B/FCRL3/TGFB1/JAK3/LILRB1/TGFB2/CD96	8
GO_SH2_DOMAIN_BINDING	GO_SH2_DOMAIN_BINDING	8/1098	36/18046	0.00120105	0.0107164	0.0080534	SIGLEC10/SIT1/LAT2/SH3PXD2B/LILRB1/LAX1/LCK/JAK2	8
GO_PATTERN_RECOGNITION_RECEPTOR_ACTIVITY	GO_PATTERN_RECOGNITION_RECEPTOR_ACTIVITY	6/1098	21/18046	0.00123035	0.0108842	0.00817952	TLR7/TLR9/LY96/TLR4/CD14/TLR8	6
GO_POSITIVE_REGULATION_OF_MESONEPHROS_DEVELOPMENT	GO_POSITIVE_REGULATION_OF_MESONEPHROS_DEVELOPMENT	6/1098	21/18046	0.00123035	0.0108842	0.00817952	GREM1/BASP1/GATA3/AGTR2/WT1/AGT	6
GO_PULMONARY_VALVE_DEVELOPMENT	GO_PULMONARY_VALVE_DEVELOPMENT	6/1098	21/18046	0.00123035	0.0108842	0.00817952	GJA5/ROBO1/HEYL/NOTCH2/NFATC1/TGFB2	6
GO_PURINERGIC_NUCLEOTIDE_RECEPTOR_SIGNALING_PATHWAY	GO_PURINERGIC_NUCLEOTIDE_RECEPTOR_SIGNALING_PATHWAY	6/1098	21/18046	0.00123035	0.0108842	0.00817952	P2RY8/GPR34/P2RY12/P2RY10/P2RX7/P2RY13	6
GO_REGULATION_OF_MICROGLIAL_CELL_ACTIVATION	GO_REGULATION_OF_MICROGLIAL_CELL_ACTIVATION	6/1098	21/18046	0.00123035	0.0108842	0.00817952	SYT11/STAP1/PTPRC/TREM2/IL6/CST7	6
GO_CARDIAC_CELL_DEVELOPMENT	GO_CARDIAC_CELL_DEVELOPMENT	14/1098	92/18046	0.00128872	0.0113617	0.00853838	SGCD/IGF1/SLC8A1/MYH11/AKAP6/RGS4/NKX2-5/FHOD3/SGCB/AGTR2/PDGFRB/HAMP/MYH10/AGT	14
GO_REGULATION_OF_BIOMINERALIZATION	GO_REGULATION_OF_BIOMINERALIZATION	14/1098	92/18046	0.00128872	0.0113617	0.00853838	MGP/MEF2C/SLC8A1/ASPN/OMD/GREM1/TMEM119/P2RX7/TGFB1/SRGN/PHOSPHO1/CCR1/TWIST1/NELL1	14
GO_POSITIVE_REGULATION_OF_ANIMAL_ORGAN_MORPHOGENESIS	GO_POSITIVE_REGULATION_OF_ANIMAL_ORGAN_MORPHOGENESIS	13/1098	82/18046	0.00129114	0.0113638	0.00853995	FGF7/FGF1/GREM1/BASP1/ROBO1/GATA3/AGTR2/ENG/TGFB2/SEMA3C/WT1/AGT/TWIST1	13
GO_REGULATION_OF_DEVELOPMENTAL_GROWTH	GO_REGULATION_OF_DEVELOPMENTAL_GROWTH	36/1098	348/18046	0.00131313	0.0115378	0.00867066	MEF2C/IGF1/MAP1B/BCL2/AKAP6/RGS4/PLXNA4/SASH3/SFRP2/SYT4/TNR/NPPC/BASP1/NRK/SH3PXD2B/NKX2-5/FOXS1/CXCR4/NRP1/ISLR2/CPNE5/MAPT/FN1/HAMP/GJA1/SEMA6B/DUSP10/SEMA3C/SEMA7A/APOE/WT1/GDF5/SPP1/FOXC2/CPNE6/SEMA3A	36
GO_INTERLEUKIN_1_SECRETION	GO_INTERLEUKIN_1_SECRETION	11/1098	63/18046	0.00133643	0.0117028	0.00879465	TLR6/CCL19/ABCA1/CCR7/P2RX7/TLR4/NLRC4/NLRP3/TLR8/AIM2/GBP5	11
GO_MUSCLE_FIBER_DEVELOPMENT	GO_MUSCLE_FIBER_DEVELOPMENT	11/1098	63/18046	0.00133643	0.0117028	0.00879465	SGCD/FLNC/BCL2/MYH11/SGCB/LOX/DYSF/HDAC9/CAV2/KEL/UCHL1	11
GO_NEURON_PROJECTION_EXTENSION	GO_NEURON_PROJECTION_EXTENSION	21/1098	168/18046	0.00134721	0.0117773	0.00885066	MAP1B/PLXNA4/NRP2/SYT4/TNR/VCL/CXCR4/NRP1/ITGA4/ISLR2/CPNE5/MAPT/FN1/SEMA6B/POSTN/SEMA3C/SEMA7A/APOE/TIAM1/CPNE6/SEMA3A	21
GO_NEGATIVE_REGULATION_OF_CELL_DEVELOPMENT	GO_NEGATIVE_REGULATION_OF_CELL_DEVELOPMENT	35/1098	337/18046	0.00142127	0.0123829	0.00930581	GLI3/IGF1/DTX1/DPYSL3/BCL2/STAP1/VIM/RGS4/LGALS1/FBN1/FRZB/THY1/TNN/COL3A1/SYT4/NGFR/TNR/S1PR3/NPPC/SPOCK1/PRTG/NRP1/HOOK3/LILRB1/SEMA6B/DUSP10/POSTN/SEMA3C/SEMA7A/APOE/SPP1/CD38/IL6/SEMA3A/NRG3	35
GO_POSITIVE_REGULATION_OF_PROTEIN_SERINE_THREONINE_KINASE_ACTIVITY	GO_POSITIVE_REGULATION_OF_PROTEIN_SERINE_THREONINE_KINASE_ACTIVITY	35/1098	337/18046	0.00142127	0.0123829	0.00930581	IGF1/HTR2A/ATP2B4/MDFIC/FGF1/TLR6/MAP4K1/ITGA1/PIK3CG/CCL19/ELANE/TLR9/PTPRC/NRK/ROBO1/PDE5A/TCL1A/F2R/P2RX7/C5AR1/CXCR4/CD40LG/PDGFRB/TGFB1/TLR4/NOX4/HTR2B/ADORA1/JAK2/FPR1/RASGRP1/TIAM1/CD74/CCND2/BIRC7	35
GO_POSITIVE_REGULATION_OF_RECEPTOR_SIGNALING_PATHWAY_VIA_STAT	GO_POSITIVE_REGULATION_OF_RECEPTOR_SIGNALING_PATHWAY_VIA_STAT	14/1098	93/18046	0.00143397	0.0124648	0.00936729	IGF1/IL31RA/PECAM1/F2R/CRLF2/IL12B/IL21/AGT/JAK2/CCL5/SOCS1/IL5/IL6/TNFSF18	14
GO_NEGATIVE_REGULATION_OF_CYTOKINE_SECRETION	GO_NEGATIVE_REGULATION_OF_CYTOKINE_SECRETION	13/1098	83/18046	0.00144741	0.0124648	0.00936729	SSC5D/SYT11/TLR6/FCGR2B/CD200/BANK1/SRGN/CD200R1/FN1/LILRB1/HDAC9/NLRP3/TLR8	13
GO_CELL_BODY_MEMBRANE	GO_CELL_BODY_MEMBRANE	7/1098	29/18046	0.00144749	0.0124648	0.00936729	CD22/CX3CR1/P2RY12/THY1/RGS8/KCND2/KCNC2	7
GO_CRANIAL_NERVE_MORPHOGENESIS	GO_CRANIAL_NERVE_MORPHOGENESIS	7/1098	29/18046	0.00144749	0.0124648	0.00936729	GLI3/PLXNA4/NRP2/MAFB/NRP1/TIFAB/SEMA3A	7
GO_NEGATIVE_REGULATION_OF_HEART_CONTRACTION	GO_NEGATIVE_REGULATION_OF_HEART_CONTRACTION	7/1098	29/18046	0.00144749	0.0124648	0.00936729	PIK3CG/TAC1/SPX/PDE5A/AGTR2/ADORA1/JAK2	7
GO_PODOSOME	GO_PODOSOME	7/1098	29/18046	0.00144749	0.0124648	0.00936729	LPXN/LCP1/VCAM1/VCL/SH3PXD2B/BIN2/FERMT3	7
GO_REGULATION_OF_B_CELL_DIFFERENTIATION	GO_REGULATION_OF_B_CELL_DIFFERENTIATION	7/1098	29/18046	0.00144749	0.0124648	0.00936729	FCRL3/NCKAP1L/TLR9/CD27/IKZF3/INPP5D/NFAM1	7
GO_POSITIVE_REGULATION_OF_LIPID_KINASE_ACTIVITY	GO_POSITIVE_REGULATION_OF_LIPID_KINASE_ACTIVITY	8/1098	37/18046	0.0014518	0.0124812	0.00937964	CD19/CCL19/P2RY12/CCR7/CCL21/PDGFRB/TGFB1/AGAP2	8
GO_TISSUE_MIGRATION	GO_TISSUE_MIGRATION	37/1098	363/18046	0.00147768	0.0126766	0.00952651	MEF2C/FGF7/MEOX2/ACTG2/RHOJ/FGF1/PLCG2/GREM1/NRP2/ARSB/ADGRA2/VEGFC/AMOTL1/TAC1/ETS1/SRPX2/ITGB3/VASH1/ROBO1/PECAM1/SPARC/CXCL13/GATA3/AGTR2/NRP1/FAP/TGFB1/ITGB2/TGFB2/DUSP10/HDAC9/APOE/AGT/SCG2/FOXC2/EGR3/SEMA3A	37
GO_ACTIVATION_OF_JANUS_KINASE_ACTIVITY	GO_ACTIVATION_OF_JANUS_KINASE_ACTIVITY	5/1098	15/18046	0.00148432	0.0126766	0.00952651	IL12B/AGT/JAK2/CCL5/SOCS1	5
GO_NADPH_OXIDASE_COMPLEX	GO_NADPH_OXIDASE_COMPLEX	5/1098	15/18046	0.00148432	0.0126766	0.00952651	NCF1B/NCF1C/NCF1/NOX4/CYBB	5
GO_POSITIVE_REGULATION_OF_NITRIC_OXIDE_SYNTHASE_BIOSYNTHETIC_PROCESS	GO_POSITIVE_REGULATION_OF_NITRIC_OXIDE_SYNTHASE_BIOSYNTHETIC_PROCESS	5/1098	15/18046	0.00148432	0.0126766	0.00952651	FCER2/TLR9/CCL2/TLR4/JAK2	5
GO_MULTICELLULAR_ORGANISMAL_SIGNALING	GO_MULTICELLULAR_ORGANISMAL_SIGNALING	24/1098	204/18046	0.00149104	0.0127131	0.0095539	FLNA/SLC8A1/ATP2B4/ABCC9/GPR88/CTNNA3/KCNIP1/CACNA2D1/KCNA1/GJC1/EHD3/TNR/NPPC/GJA5/NOS1/NKX2-5/FXYD2/CHRNB4/DRD5/GJA1/OTOA/KCND2/AGT/KCND3	24
GO_POSITIVE_REGULATION_OF_CALCIUM_ION_TRANSPORT	GO_POSITIVE_REGULATION_OF_CALCIUM_ION_TRANSPORT	17/1098	125/18046	0.00149869	0.0127573	0.00958715	MYLK/AKAP6/CD19/PLCG2/THY1/CACNA2D1/EHD3/F2R/P2RX7/CCL2/CD4/STAC/PDGFRB/APLNR/CCR1/CCL5/GCG	17
GO_INTERLEUKIN_2_PRODUCTION	GO_INTERLEUKIN_2_PRODUCTION	11/1098	64/18046	0.00152674	0.0129536	0.00973464	SASH3/PRNP/PTPRC/CD28/GATA3/CD4/PDE4B/CD83/CD86/HAVCR2/CD3E	11
GO_REGULATION_OF_IMMUNOGLOBULIN_PRODUCTION	GO_REGULATION_OF_IMMUNOGLOBULIN_PRODUCTION	11/1098	64/18046	0.00152674	0.0129536	0.00973464	CD22/FCGR2B/FCRL3/SASH3/TLR9/PTPRC/CD28/CD40LG/TGFB1/IL5/IL6	11
GO_PLASMA_MEMBRANE_ORGANIZATION	GO_PLASMA_MEMBRANE_ORGANIZATION	15/1098	104/18046	0.00153601	0.0129897	0.00976178	SYT11/FAT4/EHD2/PTPRC/ABCD2/BIN2/P2RX7/CXCR4/EPB41L3/COL5A1/DYSF/TGFB2/MYH10/CAV2/CRB1	15
GO_SYNAPTIC_TRANSMISSION_GLUTAMATERGIC	GO_SYNAPTIC_TRANSMISSION_GLUTAMATERGIC	15/1098	104/18046	0.00153601	0.0129897	0.00976178	MEF2C/HTR2A/DGKI/TNR/GRIN2A/CCL2/RELN/SERPINE2/KMO/CNIH2/ADORA1/GRIK1/GRID1/GRM7/SHANK1	15
GO_EMBRYONIC_CRANIAL_SKELETON_MORPHOGENESIS	GO_EMBRYONIC_CRANIAL_SKELETON_MORPHOGENESIS	9/1098	46/18046	0.00158036	0.013343	0.0100273	MEF2C/CHST11/PRRX1/PAX5/WNT9B/MMP16/SIX2/TWIST1/FOXC2	9
GO_EXTRACELLULAR_MATRIX_STRUCTURAL_CONSTITUENT_CONFERRING_COMPRESSION_RESISTANCE	GO_EXTRACELLULAR_MATRIX_STRUCTURAL_CONSTITUENT_CONFERRING_COMPRESSION_RESISTANCE	6/1098	22/18046	0.00160551	0.0134676	0.0101209	PRG4/OGN/ASPN/LUM/BGN/VCAN	6
GO_INFLAMMATORY_CELL_APOPTOTIC_PROCESS	GO_INFLAMMATORY_CELL_APOPTOTIC_PROCESS	6/1098	22/18046	0.00160551	0.0134676	0.0101209	MEF2C/PIK3CD/CCR5/CTSL/CCL5/IL6	6
GO_MAST_CELL_GRANULE	GO_MAST_CELL_GRANULE	6/1098	22/18046	0.00160551	0.0134676	0.0101209	MILR1/PIK3CG/LAT2/PIK3CD/SRGN/RASGRP1	6
GO_REGULATION_OF_SUPEROXIDE_ANION_GENERATION	GO_REGULATION_OF_SUPEROXIDE_ANION_GENERATION	6/1098	22/18046	0.00160551	0.0134676	0.0101209	TGFB1/TYROBP/MAPT/ITGB2/AGT/ITGAM	6
GO_NATURAL_KILLER_CELL_ACTIVATION	GO_NATURAL_KILLER_CELL_ACTIVATION	13/1098	84/18046	0.00161906	0.0135593	0.0101898	AXL/CORO1A/PIK3CD/PTPRC/IL21R/TYROBP/NCR3/ITGB2/IL12B/HAVCR2/CD2/RASGRP1/CLNK	13
GO_MUSCLE_CELL_MIGRATION	GO_MUSCLE_CELL_MIGRATION	15/1098	105/18046	0.00169351	0.0141599	0.0106412	MEF2C/IGF1/PARVA/BCL2/PRKG1/THBS4/ITGB3/AIF1/NRP1/PDGFRB/NOX4/POSTN/AGT/CCL5/MEGF10	15
GO_SPECIFIC_GRANULE	GO_SPECIFIC_GRANULE	20/1098	160/18046	0.00173273	0.0144645	0.0108701	HVCN1/ATP8B4/ELANE/TIMP2/CD53/VCL/LAIR1/SLC2A5/ITGAL/C3AR1/CHRNB4/ITGB2/CYBB/CD93/BPI/HP/BST1/OLR1/ITGAM/OSCAR	20
GO_NEGATIVE_REGULATION_OF_BLOOD_CIRCULATION	GO_NEGATIVE_REGULATION_OF_BLOOD_CIRCULATION	8/1098	38/18046	0.00174235	0.0144697	0.010874	PIK3CG/TAC1/SPX/PDE5A/F2R/AGTR2/ADORA1/JAK2	8
GO_POSITIVE_REGULATION_OF_LYMPHOCYTE_MIGRATION	GO_POSITIVE_REGULATION_OF_LYMPHOCYTE_MIGRATION	8/1098	38/18046	0.00174235	0.0144697	0.010874	AIF1/CXCL13/SPN/DOCK8/CCL21/ITGA4/CCL5/XCL2	8
GO_TYPE_2_IMMUNE_RESPONSE	GO_TYPE_2_IMMUNE_RESPONSE	8/1098	38/18046	0.00174235	0.0144697	0.010874	IL31RA/GATA3/BCL6B/CD86/NLRP3/CD74/IL6/IDO1	8
GO_REGULATION_OF_BLOOD_PRESSURE	GO_REGULATION_OF_BLOOD_PRESSURE	22/1098	183/18046	0.00174452	0.0144697	0.010874	ADAMTS16/EDNRA/VEGFC/TAC1/SUCNR1/SPX/GJA5/NOS1/UTS2B/F2R/AGTR2/RAMP2/COL1A2/SLC2A5/DRD5/GJA1/POSTN/ADORA1/AGT/NPR3/ENPEP/UTS2	22
GO_CELL_LEADING_EDGE	GO_CELL_LEADING_EDGE	40/1098	405/18046	0.00175354	0.0145213	0.0109128	MYLK/DPYSL3/PARVA/ACTG2/WIPF1/VIM/CORO1A/SCIMP/CTNNA3/THY1/ARHGAP31/TLN1/AMOTL1/MYO1G/ACTN1/LCP1/SHISA8/ABI3/ITGB3/SWAP70/AIF1/RAC2/ANTXR1/CXCR4/DOCK8/EPB41L3/MYADM/FAP/MAPT/CD44/DYSF/PLEK/ABLIM3/CCDC88A/SAMSN1/MYH10/ADORA1/TIAM1/KCNC2/LAMP5	40
GO_INTERFERON_ALPHA_PRODUCTION	GO_INTERFERON_ALPHA_PRODUCTION	7/1098	30/18046	0.00179017	0.014801	0.011123	LILRA4/TLR7/TLR9/NLRC3/TLR4/HAVCR2/TLR8	7
GO_ENDODERM_DEVELOPMENT	GO_ENDODERM_DEVELOPMENT	12/1098	75/18046	0.00180407	0.0148922	0.0111915	COL8A1/MMP2/COL5A1/ITGA4/FN1/ITGB2/COL4A2/EOMES/COL5A2/COL12A1/MIXL1/GDF3	12
GO_CARDIAC_CHAMBER_DEVELOPMENT	GO_CARDIAC_CHAMBER_DEVELOPMENT	21/1098	172/18046	0.00181112	0.0149029	0.0111996	MEF2C/PARVA/LTBP1/HEG1/NRP2/SFRP2/GJA5/ROBO1/NKX2-5/HEYL/GATA3/NOTCH2/ENG/NRP1/TGFB1/FZD1/TGFB2/SEMA3C/MYH10/DAND5/FOXC2	21
GO_VACUOLAR_LUMEN	GO_VACUOLAR_LUMEN	21/1098	172/18046	0.00181112	0.0149029	0.0111996	OGN/KERA/LUM/OMD/ELANE/ARSB/GPC6/CD1E/CTSK/BGN/SDC3/VCAN/PDGFRB/C3/CTSL/BPI/RNASE2/MNDA/CD74/GPC5/RNASE3	21
GO_GLIOGENESIS	GO_GLIOGENESIS	31/1098	292/18046	0.00183569	0.0150811	0.0113335	GLI3/DTX1/STAP1/VIM/PENK/CX3CR1/P2RY12/GPR183/NRROS/TSPAN2/LTA/C5AR1/CXCR4/CCL2/RELN/TENM4/FGF5/MXRA8/TGFB1/MAPT/TLR4/TREM2/SERPINE2/TGFB2/DUSP10/C1QA/IL34/POU3F1/TIAM1/IL6/MATN2	31
GO_MULTI_MULTICELLULAR_ORGANISM_PROCESS	GO_MULTI_MULTICELLULAR_ORGANISM_PROCESS	26/1098	231/18046	0.0018394	0.0150878	0.0113385	PTGIS/BCL2/ARHGDIB/IGFBP7/TAC1/NRK/PLA2G4C/ETS1/SH3PXD2B/EPYC/MMP2/TCF23/RAMP2/TIMP1/SERPINE2/GJA1/HAVCR2/PAPPA/CD96/AGT/SPP1/CD38/CLNK/GIP/IDO1/MMP7	26
GO_COLLAGEN_CATABOLIC_PROCESS	GO_COLLAGEN_CATABOLIC_PROCESS	9/1098	47/18046	0.00185093	0.0151583	0.0113915	MRC2/CTSK/COL15A1/MMP2/MMP16/FAP/CTSL/ADAMTS2/MMP7	9
GO_NEUROTRANSMITTER_BIOSYNTHETIC_PROCESS	GO_NEUROTRANSMITTER_BIOSYNTHETIC_PROCESS	15/1098	106/18046	0.00186427	0.0152435	0.0114555	ATP2B4/PTGIS/TLR6/CX3CR1/NOS1/AIF1/AGTR2/MOXD1/TLR4/DPYD/ITGB2/SLC22A2/CHAT/AGT/JAK2	15
GO_RESPONSE_TO_NUTRIENT	GO_RESPONSE_TO_NUTRIENT	25/1098	220/18046	0.00195345	0.0159475	0.0119846	BCHE/SLC8A1/MAP1B/ABCC9/TNC/PENK/ARSB/P2RY12/FOLR2/SFRP2/SELL/VCAM1/ABCA1/SPARC/P2RX7/LTA/CD4/COL1A1/CYBB/HAMP/ALDH1A2/POSTN/CD3E/SPP1/PHEX	25
GO_REGULATION_OF_CARDIOCYTE_DIFFERENTIATION	GO_REGULATION_OF_CARDIOCYTE_DIFFERENTIATION	11/1098	66/18046	0.00197398	0.0160898	0.0120915	MEF2C/IGF1/PRICKLE1/AKAP6/RGS4/GREM1/NKX2-5/TGFB1/HAMP/TGFB2/SEMA3C	11
GO_CARDIAC_SEPTUM_MORPHOGENESIS	GO_CARDIAC_SEPTUM_MORPHOGENESIS	12/1098	76/18046	0.00202623	0.0164639	0.0123727	PARVA/NRP2/GJA5/ROBO1/NKX2-5/HEYL/NOTCH2/ENG/NRP1/FZD1/TGFB2/SEMA3C	12
GO_MULTICELLULAR_ORGANISMAL_RESPONSE_TO_STRESS	GO_MULTICELLULAR_ORGANISMAL_RESPONSE_TO_STRESS	12/1098	76/18046	0.00202623	0.0164639	0.0123727	MEF2C/BCL2/THBS4/TACR1/PENK/TAC1/NOS1/RELN/GJA1/APOE/LYPD1/IDO1	12
GO_METALLOENDOPEPTIDASE_INHIBITOR_ACTIVITY	GO_METALLOENDOPEPTIDASE_INHIBITOR_ACTIVITY	5/1098	16/18046	0.00205169	0.0165155	0.0124114	TIMP2/SPOCK1/TIMP1/SPOCK2/LXN	5
GO_MHC_CLASS_II_PROTEIN_COMPLEX_BINDING	GO_MHC_CLASS_II_PROTEIN_COMPLEX_BINDING	5/1098	16/18046	0.00205169	0.0165155	0.0124114	MS4A1/HLA-DMB/HLA-DRA/HLA-DOA/CD74	5
GO_NEGATIVE_REGULATION_OF_INTERLEUKIN_12_PRODUCTION	GO_NEGATIVE_REGULATION_OF_INTERLEUKIN_12_PRODUCTION	5/1098	16/18046	0.00205169	0.0165155	0.0124114	JAK3/CMKLR1/LILRB1/TIGIT/TLR8	5
GO_NEURON_CELL_CELL_ADHESION	GO_NEURON_CELL_CELL_ADHESION	5/1098	16/18046	0.00205169	0.0165155	0.0124114	NRXN2/NRXN3/NCAM2/TNR/NLGN4X	5
GO_POSITIVE_REGULATION_OF_INTERLEUKIN_8_SECRETION	GO_POSITIVE_REGULATION_OF_INTERLEUKIN_8_SECRETION	5/1098	16/18046	0.00205169	0.0165155	0.0124114	TLR1/F2R/TLR4/CD14/CD2	5
GO_REGULATION_OF_GLUTAMATE_SECRETION	GO_REGULATION_OF_GLUTAMATE_SECRETION	5/1098	16/18046	0.00205169	0.0165155	0.0124114	SYT4/P2RX7/KMO/ADORA1/GRM7	5
GO_MUSCLE_CELL_DIFFERENTIATION	GO_MUSCLE_CELL_DIFFERENTIATION	38/1098	383/18046	0.00208049	0.0167213	0.0125661	SGCD/MEF2C/IGF1/SLC8A1/FLNC/ZEB1/BCL2/MYH11/AKAP6/RGS4/GREM1/CDON/EHD2/CD53/NOS1/TMEM119/NKX2-5/FHOD3/SGCB/LOX/AGTR2/RAMP2/ENG/NFATC1/PDGFRB/TGFB1/DYSF/NOX4/HAMP/HDAC9/MYH10/WT1/AGT/CAV2/ADAM12/KEL/MEGF10/UCHL1	38
GO_REGULATION_OF_NEUROTRANSMITTER_TRANSPORT	GO_REGULATION_OF_NEUROTRANSMITTER_TRANSPORT	18/1098	140/18046	0.00210241	0.0168713	0.0126789	MEF2C/HTR2A/PRKCB/SYT11/RGS4/CHRNA3/TACR2/NCS1/SYT4/DGKI/NOS1/ITGB3/P2RX7/CHRNB4/CHRNA6/LILRB1/KMO/SYN1	18
GO_FASCIA_ADHERENS	GO_FASCIA_ADHERENS	4/1098	10/18046	0.00212815	0.0169207	0.012716	CTNNA3/ACTN1/VCL/GJA1	4
GO_INTERLEUKIN_12_SECRETION	GO_INTERLEUKIN_12_SECRETION	4/1098	10/18046	0.00212815	0.0169207	0.012716	CCL19/CCR7/LILRB1/TLR8	4
GO_POSITIVE_REGULATION_OF_B_CELL_RECEPTOR_SIGNALING_PATHWAY	GO_POSITIVE_REGULATION_OF_B_CELL_RECEPTOR_SIGNALING_PATHWAY	4/1098	10/18046	0.00212815	0.0169207	0.012716	PRKCB/STAP1/CMTM3/NFAM1	4
GO_REGULATION_OF_OOGENESIS	GO_REGULATION_OF_OOGENESIS	4/1098	10/18046	0.00212815	0.0169207	0.012716	IGF1/PDE3A/NPPC/PDE5A	4
GO_RELAXATION_OF_SMOOTH_MUSCLE	GO_RELAXATION_OF_SMOOTH_MUSCLE	4/1098	10/18046	0.00212815	0.0169207	0.012716	SLC8A1/KCNMA1/PRKG1/ADORA1	4
GO_SUPEROXIDE_GENERATING_NADPH_OXIDASE_ACTIVATOR_ACTIVITY	GO_SUPEROXIDE_GENERATING_NADPH_OXIDASE_ACTIVATOR_ACTIVITY	4/1098	10/18046	0.00212815	0.0169207	0.012716	NCF1B/SH3PXD2B/NCF1C/NCF1	4
GO_CORTICAL_CYTOSKELETON_ORGANIZATION	GO_CORTICAL_CYTOSKELETON_ORGANIZATION	9/1098	48/18046	0.00215728	0.0170585	0.0128195	WIPF1/WAS/FMNL3/NCKAP1L/TLN1/EHD2/FMNL1/EPB41L3/PLEK	9
GO_NEGATIVE_REGULATION_OF_LEUKOCYTE_MIGRATION	GO_NEGATIVE_REGULATION_OF_LEUKOCYTE_MIGRATION	9/1098	48/18046	0.00215728	0.0170585	0.0128195	STAP1/GREM1/GPR18/CD200/CCL2/CCL21/CD200R1/ADORA1/CYP19A1	9
GO_POSITIVE_REGULATION_OF_SMOOTH_MUSCLE_CELL_MIGRATION	GO_POSITIVE_REGULATION_OF_SMOOTH_MUSCLE_CELL_MIGRATION	9/1098	48/18046	0.00215728	0.0170585	0.0128195	IGF1/BCL2/AIF1/NRP1/PDGFRB/NOX4/POSTN/AGT/CCL5	9
GO_AMINE_TRANSPORT	GO_AMINE_TRANSPORT	14/1098	97/18046	0.00215864	0.0170585	0.0128195	HTR2A/SYT11/RGS4/CHRNA3/TACR2/P2RY12/SYT4/P2RX7/AGTR2/CHRNA6/KMO/ADORA1/AGT/GRM7	14
GO_INTERLEUKIN_8_SECRETION	GO_INTERLEUKIN_8_SECRETION	7/1098	31/18046	0.00219258	0.0171697	0.0129031	SSC5D/TLR6/TLR1/F2R/TLR4/CD14/CD2	7
GO_NEGATIVE_REGULATION_OF_LYMPHOCYTE_APOPTOTIC_PROCESS	GO_NEGATIVE_REGULATION_OF_LYMPHOCYTE_APOPTOTIC_PROCESS	7/1098	31/18046	0.00219258	0.0171697	0.0129031	CD27/DOCK8/JAK3/PTCRA/CCL5/CD74/IDO1	7
GO_OSTEOBLAST_PROLIFERATION	GO_OSTEOBLAST_PROLIFERATION	7/1098	31/18046	0.00219258	0.0171697	0.0129031	BCL2/GREM1/TNN/TMEM119/NPR3/CTHRC1/NELL1	7
GO_REGULATION_OF_AMINO_ACID_TRANSPORT	GO_REGULATION_OF_AMINO_ACID_TRANSPORT	7/1098	31/18046	0.00219258	0.0171697	0.0129031	RGS4/SYT4/P2RX7/KMO/ADORA1/AGT/GRM7	7
GO_RELAXATION_OF_MUSCLE	GO_RELAXATION_OF_MUSCLE	7/1098	31/18046	0.00219258	0.0171697	0.0129031	SLC8A1/KCNMA1/PRKG1/PDE5A/PDE4B/ADORA1/TIFAB	7
GO_SYNAPTIC_TRANSMISSION_CHOLINERGIC	GO_SYNAPTIC_TRANSMISSION_CHOLINERGIC	7/1098	31/18046	0.00219258	0.0171697	0.0129031	CHRNA3/TACR2/TAC1/CHRNB4/CHRNA6/APOE/LYPD1	7
GO_NEUROTRANSMITTER_METABOLIC_PROCESS	GO_NEUROTRANSMITTER_METABOLIC_PROCESS	19/1098	152/18046	0.00223024	0.0174382	0.0131049	BCHE/ATP2B4/PTGIS/TLR6/CX3CR1/DPYS/NOS1/AIF1/GRIN2A/AGTR2/MOXD1/TLR4/DPYD/ITGB2/SLC22A2/CHAT/AGT/JAK2/SDS	19
GO_REGULATION_OF_SMOOTH_MUSCLE_CONTRACTION	GO_REGULATION_OF_SMOOTH_MUSCLE_CONTRACTION	11/1098	67/18046	0.00223455	0.0174456	0.0131105	CNN1/KCNMA1/PRKG1/CHRNA3/TACR2/TACR1/SPX/F2R/CHRNB4/CALCRL/ADORA1	11
GO_CELL_FATE_COMMITMENT	GO_CELL_FATE_COMMITMENT	29/1098	271/18046	0.00224886	0.017531	0.0131746	MEF2C/GLI3/BCL2/ZNF521/SFRP2/CDON/PTCH2/EBF2/SH3PXD2B/DHH/NKX2-5/PRRX1/GLI2/GATA3/SLAMF6/NOTCH2/SPN/WNT9B/NRP1/TENM4/SIX2/IL12B/EOMES/FEV/IL12RB1/WT1/IL6/FOXC2/GDF3	29
GO_NEGATIVE_REGULATION_OF_HYDROLASE_ACTIVITY	GO_NEGATIVE_REGULATION_OF_HYDROLASE_ACTIVITY	44/1098	463/18046	0.00225799	0.0175757	0.0132082	SERPINA9/A2M/NCKAP1L/TIMP2/SFRP2/RHOH/C4A/PRNP/CD27/NGFR/DGKI/C4B/NOS1/SPOCK1/CR1/COL6A3/CRIM1/TIMP1/SERPINA6/IFI16/SPOCK2/AQP1/CD44/LXN/SERPINE2/C3/TFPI2/TGFB2/PI15/CST6/HDAC9/CRB2/CST4/CD109/AGT/CSRNP3/CST2/APOC1/PCDH11X/CST5/CCDC8/CST7/SLC7A14/BIRC7	44
GO_AMMONIUM_ION_BINDING	GO_AMMONIUM_ION_BINDING	12/1098	77/18046	0.00227028	0.0176406	0.013257	BCHE/HTR2A/CHRNA3/ABCA1/CHRNB4/CHRNA6/CETP/DRD5/HTR2B/RASGRP1/APOC1/PCYT1B	12
GO_CARDIAC_MUSCLE_CONTRACTION	GO_CARDIAC_MUSCLE_CONTRACTION	18/1098	141/18046	0.00227654	0.0176406	0.013257	SGCD/FLNA/SLC8A1/PIK3CG/CLIC2/CTNNA3/CACNA2D1/GJC1/EHD3/GJA5/NOS1/NKX2-5/PDE5A/CXCR4/PDE4B/GJA1/ADORA1/KCND3	18
GO_REGULATION_OF_RHO_PROTEIN_SIGNAL_TRANSDUCTION	GO_REGULATION_OF_RHO_PROTEIN_SIGNAL_TRANSDUCTION	18/1098	141/18046	0.00227654	0.0176406	0.013257	P2RY8/ARHGDIB/LPAR4/HEG1/GPR18/VAV1/COL3A1/GPR65/P2RY10/ABCA1/ROBO1/F2R/NRP1/PDGFRB/RASGRF2/APOE/TIAM1/RASGRF1	18
GO_MAST_CELL_ACTIVATION	GO_MAST_CELL_ACTIVATION	10/1098	58/18046	0.00240687	0.0186227	0.013995	MILR1/CNR2/PIK3CG/LAT2/RHOH/PIK3CD/RAC2/CD84/CRLF2/RASGRP1	10
GO_DEFENSE_RESPONSE_TO_GRAM_NEGATIVE_BACTERIUM	GO_DEFENSE_RESPONSE_TO_GRAM_NEGATIVE_BACTERIUM	13/1098	88/18046	0.00248284	0.0191819	0.0144152	SSC5D/SELP/ELANE/MPEG1/TLR9/RNASE6/CD4/TLR4/LYPD8/BPI/IL12B/IL6/RNASE3	13
GO_REGULATION_OF_COLLAGEN_METABOLIC_PROCESS	GO_REGULATION_OF_COLLAGEN_METABOLIC_PROCESS	9/1098	49/18046	0.00250264	0.0193061	0.0145086	VIM/NPPC/F2R/ENG/FAP/PDGFRB/TGFB1/CIITA/IL6	9
GO_MAIN_AXON	GO_MAIN_AXON	11/1098	68/18046	0.00252232	0.0194001	0.0145792	MAP1A/MAP1B/THY1/KCNA1/SPOCK1/EPB41L3/MAPT/UCN3/ADORA1/TIAM1/KCNC2	11
GO_POSITIVE_REGULATION_OF_PHAGOCYTOSIS	GO_POSITIVE_REGULATION_OF_PHAGOCYTOSIS	11/1098	68/18046	0.00252232	0.0194001	0.0145792	STAP1/FCGR2B/NCKAP1L/RAB31/C4A/PTPRC/C4B/CCL2/TREM2/CAMK1D/C3	11
GO_CALYX_OF_HELD	GO_CALYX_OF_HELD	6/1098	24/18046	0.00260906	0.0199489	0.0149917	PRKCB/NCS1/KCNA1/NOS1/KCNA3/ADORA1	6
GO_G_PROTEIN_ALPHA_SUBUNIT_BINDING	GO_G_PROTEIN_ALPHA_SUBUNIT_BINDING	6/1098	24/18046	0.00260906	0.0199489	0.0149917	HTR2A/RGS4/F2R/RGS1/RGS19/HTR2B	6
GO_G_PROTEIN_COUPLED_PURINERGIC_RECEPTOR_SIGNALING_PATHWAY	GO_G_PROTEIN_COUPLED_PURINERGIC_RECEPTOR_SIGNALING_PATHWAY	6/1098	24/18046	0.00260906	0.0199489	0.0149917	P2RY8/GPR34/P2RY12/P2RY10/P2RY13/ADORA1	6
GO_TOLL_LIKE_RECEPTOR_9_SIGNALING_PATHWAY	GO_TOLL_LIKE_RECEPTOR_9_SIGNALING_PATHWAY	6/1098	24/18046	0.00260906	0.0199489	0.0149917	FCRL3/LILRA4/TLR7/TLR9/HAVCR2/TLR8	6
GO_FC_RECEPTOR_MEDIATED_STIMULATORY_SIGNALING_PATHWAY	GO_FC_RECEPTOR_MEDIATED_STIMULATORY_SIGNALING_PATHWAY	18/1098	143/18046	0.00266121	0.0202591	0.0152248	WIPF1/WAS/FCGR2B/PLCG2/NCKAP1L/ELMO1/VAV1/MYO1G/PTPRC/IGHV1OR15-1/CD3G/FCGR2A/FCGR3A/IGHG4/FCGR1A/IGKV2D-30/IGKV2-29/IGKV4-1	18
GO_LUMENAL_SIDE_OF_MEMBRANE	GO_LUMENAL_SIDE_OF_MEMBRANE	7/1098	32/18046	0.00266135	0.0202591	0.0152248	HLA-DQA2/HLA-DQB2/HLA-DPB1/HLA-DRA/CD74/HLA-DPA1/HLA-DQA1	7
GO_PURINERGIC_RECEPTOR_SIGNALING_PATHWAY	GO_PURINERGIC_RECEPTOR_SIGNALING_PATHWAY	7/1098	32/18046	0.00266135	0.0202591	0.0152248	P2RY8/GPR34/P2RY12/P2RY10/P2RX7/P2RY13/ADORA1	7
GO_NEGATIVE_REGULATION_OF_IMMUNE_EFFECTOR_PROCESS	GO_NEGATIVE_REGULATION_OF_IMMUNE_EFFECTOR_PROCESS	16/1098	121/18046	0.00272262	0.0206648	0.0155296	CD22/A2M/FCGR2B/FCRL3/FGL2/PTPRC/CR1/HTRA1/CD84/TGFB1/JAK3/LILRB1/HAVCR2/TGFB2/DUSP10/CD96	16
GO_RENAL_SYSTEM_PROCESS	GO_RENAL_SYSTEM_PROCESS	16/1098	121/18046	0.00272262	0.0206648	0.0155296	KCNMA1/BCL2/CHRNA3/TAC1/SUCNR1/SPX/GJA5/F2R/AGTR2/CHRNB4/AQP1/SULF1/GJA1/ADORA1/AGT/NPR3	16
GO_NEURON_PROJECTION_REGENERATION	GO_NEURON_PROJECTION_REGENERATION	10/1098	59/18046	0.00274327	0.0207235	0.0155738	MAP1B/BCL2/TNC/THY1/TNR/PRRX1/NREP/JAK2/SPP1/MATN2	10
GO_PROTEOGLYCAN_METABOLIC_PROCESS	GO_PROTEOGLYCAN_METABOLIC_PROCESS	13/1098	89/18046	0.00274938	0.0207235	0.0155738	IGF1/CSGALNACT2/ARSB/CHST11/BGN/GAL3ST4/VCAN/SPOCK2/SULF1/CHSY3/CHST15/NDST4/NDNF	13
GO_REGULATION_OF_PROTEIN_TYROSINE_KINASE_ACTIVITY	GO_REGULATION_OF_PROTEIN_TYROSINE_KINASE_ACTIVITY	13/1098	89/18046	0.00274938	0.0207235	0.0155738	STAP1/GREM1/THY1/PRNP/PTPRC/RELN/NCF1/NOX4/CASS4/ADORA1/AGT/CCL5/FCGR1A	13
GO_REGULATION_OF_ANIMAL_ORGAN_MORPHOGENESIS	GO_REGULATION_OF_ANIMAL_ORGAN_MORPHOGENESIS	27/1098	250/18046	0.0027496	0.0207235	0.0155738	FGF7/ASPN/PRICKLE1/BCL2/FGF1/GREM1/GPC6/SFRP2/BASP1/ROBO1/GATA3/AGTR2/WNT9B/ENG/DAB2/SIX2/DACT1/FZD1/SULF1/TGFB2/SEMA3C/WT1/AGT/TWIST1/TIAM1/CTHRC1/FOXC2	27
GO_CD4_POSITIVE_ALPHA_BETA_T_CELL_LINEAGE_COMMITMENT	GO_CD4_POSITIVE_ALPHA_BETA_T_CELL_LINEAGE_COMMITMENT	5/1098	17/18046	0.00276233	0.0207235	0.0155738	SLAMF6/SPN/IL12B/IL12RB1/IL6	5
GO_LYMPH_NODE_DEVELOPMENT	GO_LYMPH_NODE_DEVELOPMENT	5/1098	17/18046	0.00276233	0.0207235	0.0155738	LTA/CD248/TGFB1/LTB/CXCR5	5
GO_POSITIVE_REGULATION_OF_INTERLEUKIN_17_PRODUCTION	GO_POSITIVE_REGULATION_OF_INTERLEUKIN_17_PRODUCTION	5/1098	17/18046	0.00276233	0.0207235	0.0155738	SLAMF6/TGFB1/IL12B/IL21/IL6	5
GO_POSITIVE_REGULATION_OF_VOLTAGE_GATED_POTASSIUM_CHANNEL_ACTIVITY	GO_POSITIVE_REGULATION_OF_VOLTAGE_GATED_POTASSIUM_CHANNEL_ACTIVITY	5/1098	17/18046	0.00276233	0.0207235	0.0155738	AKAP6/KCNA1/TREM2/LRRC55/KCNC2	5
GO_ENDOTHELIAL_CELL_MIGRATION	GO_ENDOTHELIAL_CELL_MIGRATION	29/1098	275/18046	0.00279145	0.0209117	0.0157152	MEF2C/MEOX2/RHOJ/FGF1/GREM1/NRP2/ADGRA2/VEGFC/AMOTL1/ETS1/SRPX2/ITGB3/VASH1/ROBO1/PECAM1/SPARC/CXCL13/GATA3/AGTR2/NRP1/FAP/TGFB1/ITGB2/HDAC9/APOE/AGT/SCG2/FOXC2/EGR3	29
GO_CELLULAR_RESPONSE_TO_MECHANICAL_STIMULUS	GO_CELLULAR_RESPONSE_TO_MECHANICAL_STIMULUS	12/1098	79/18046	0.00283042	0.021173	0.0159116	TLR7/PIEZO2/ENG/TLR4/AQP1/COL1A1/FAS/GJA1/AGT/TLR8/KCNK4/MMP7	12
GO_ACTIN_CYTOSKELETON_REORGANIZATION	GO_ACTIN_CYTOSKELETON_REORGANIZATION	14/1098	100/18046	0.00288151	0.0214932	0.0161522	FLNA/FGF7/PARVA/STAP1/ARHGDIB/THSD7A/NRK/GPR65/ANTXR1/NOTCH2/NRP1/THSD7B/PLEK/CASS4	14
GO_GLUTAMATE_RECEPTOR_SIGNALING_PATHWAY	GO_GLUTAMATE_RECEPTOR_SIGNALING_PATHWAY	14/1098	100/18046	0.00288151	0.0214932	0.0161522	MEF2C/FRRS1L/PRNP/SHISA8/GRIN2A/CCL2/RELN/CNIH2/GRIK1/GRID1/TIAM1/GRM7/RASGRF1/SHANK1	14
GO_CYTOKINE_PRODUCTION_INVOLVED_IN_INFLAMMATORY_RESPONSE	GO_CYTOKINE_PRODUCTION_INVOLVED_IN_INFLAMMATORY_RESPONSE	9/1098	50/18046	0.00289043	0.0214978	0.0161557	TLR6/GPSM3/ABCD2/NLRC3/CD6/TLR4/CD96/GBP5/IDO1	9
GO_INTERCALATED_DISC	GO_INTERCALATED_DISC	9/1098	50/18046	0.00289043	0.0214978	0.0161557	SLC8A1/AKAP6/CTNNA3/GJC1/ACTN1/GJA5/VCL/HAMP/GJA1	9
GO_HEART_GROWTH	GO_HEART_GROWTH	15/1098	111/18046	0.0029478	0.0218931	0.0164527	MEF2C/IGF1/AKAP6/RGS4/HEG1/BASP1/NKX2-5/AGTR2/TENM4/HAMP/GJA1/TGFB2/WT1/AGT/FOXC2	15
GO_ENZYME_INHIBITOR_ACTIVITY	GO_ENZYME_INHIBITOR_ACTIVITY	37/1098	378/18046	0.00297285	0.0220476	0.0165688	PPP1R12B/SERPINA9/ATP2B4/A2M/PPP1R12A/TIMP2/RHOH/C4A/PRNP/CD27/DGKI/C4B/SCG5/SPOCK1/COL6A3/CRIM1/TIMP1/SERPINA6/PKIA/SPOCK2/LXN/SERPINE2/C3/TFPI2/PI15/CST6/CRB2/CST4/CD109/AGT/CST2/APOC1/SOCS1/CST5/CST7/APOC2/BIRC7	37
GO_ENDOTHELIAL_CELL_PROLIFERATION	GO_ENDOTHELIAL_CELL_PROLIFERATION	22/1098	191/18046	0.00298952	0.0221395	0.0166379	MEF2C/THBS4/NRP2/VEGFC/NGFR/ITGB3/VASH1/SPARC/CCL2/NRP1/ITGA4/DYSF/SULF1/GJA1/APLNR/ALDH1A2/HTR2B/APOE/CCL26/SCG2/CAV2/EGR3	22
GO_REGULATION_OF_MYELOID_CELL_DIFFERENTIATION	GO_REGULATION_OF_MYELOID_CELL_DIFFERENTIATION	27/1098	252/18046	0.00307347	0.0226964	0.0170564	MEF2C/RASSF2/PRKCB/NCKAP1L/FBN1/EVI2B/MAFB/ETS1/NOTCH2/LOX/SPI1/CD4/TGFB1/TYROBP/TLR4/TREM2/LILRB1/IL12B/GP1BA/C1QC/CCR1/INPP5D/IL34/LILRB4/SLC9B2/IL5/CD74	27
GO_STEM_CELL_DIFFERENTIATION	GO_STEM_CELL_DIFFERENTIATION	27/1098	252/18046	0.00307347	0.0226964	0.0170564	BCHE/MEF2C/PRICKLE1/A2M/GREM1/NRP2/EDNRA/FRZB/PTPRC/LMO1/SHC4/NKX2-5/GATA3/NRP1/FN1/TRIM6/FZD1/SEMA6B/TGFB2/EOMES/ALDH1A2/SEMA3C/SEMA7A/HTR2B/TWIST1/FOXC2/SEMA3A	27
GO_NEURON_DEATH	GO_NEURON_DEATH	35/1098	353/18046	0.00308497	0.0227489	0.0170959	MEF2C/BCL2/AXL/TLR6/FCGR2B/ITGA1/CORO1A/CX3CR1/PRNP/NGFR/CD200/F2R/GATA3/C5AR1/CCL2/NRP1/GPNMB/TYROBP/MAPT/TLR4/CD200R1/ITGB2/FZD1/TGFB2/KMO/C1QA/APOE/ADORA1/JAK2/AGAP2/GDF5/CCL5/KIR3DL2/ITGAM/NDNF	35
GO_NEUROTRANSMITTER_SECRETION	GO_NEUROTRANSMITTER_SECRETION	20/1098	168/18046	0.0030921	0.0227691	0.017111	MEF2C/HTR2A/PRKCB/SYT11/NRXN2/CHRNA3/TACR2/NCS1/SYT4/DGKI/P2RX7/CHRNB4/CHRNA6/STX11/SLC22A2/CHAT/KMO/RPH3A/SYN1/DOC2B	20
GO_RESPONSE_TO_ALCOHOL	GO_RESPONSE_TO_ALCOHOL	26/1098	240/18046	0.003125	0.0229787	0.0172686	GNG2/RGS4/MAP4K1/IGFBP7/CCL19/TNC/PENK/CD27/NPPC/VCAM1/ABCA1/CCR7/SPARC/GATA3/GRIN2A/CCL21/SPI1/TGFB1/CCR5/CYBB/HAMP/RGS19/CD14/UCN3/KCNC2/MLC1	26
GO_MESONEPHROS_DEVELOPMENT	GO_MESONEPHROS_DEVELOPMENT	14/1098	101/18046	0.00316254	0.0229893	0.0172765	GLI3/BCL2/FAT4/FGF1/ADAMTS16/GREM1/BASP1/GATA3/AGTR2/WNT9B/SIX2/WT1/AGT/FOXC2	14
GO_POSITIVE_REGULATION_OF_ENDOCYTOSIS	GO_POSITIVE_REGULATION_OF_ENDOCYTOSIS	14/1098	101/18046	0.00316254	0.0229893	0.0172765	STAP1/AXL/CCL19/PLCG2/NCKAP1L/GREM1/RAB31/SFRP4/CCL21/DAB2/TREM2/C3/CD14/APOE	14
GO_CRANIAL_NERVE_STRUCTURAL_ORGANIZATION	GO_CRANIAL_NERVE_STRUCTURAL_ORGANIZATION	4/1098	11/18046	0.00318409	0.0229893	0.0172765	PLXNA4/NRP2/NRP1/SEMA3A	4
GO_ESTABLISHMENT_OF_LYMPHOCYTE_POLARITY	GO_ESTABLISHMENT_OF_LYMPHOCYTE_POLARITY	4/1098	11/18046	0.00318409	0.0229893	0.0172765	CCL19/CCR7/DOCK8/CCL21	4
GO_EXTRACELLULAR_REGULATION_OF_SIGNAL_TRANSDUCTION	GO_EXTRACELLULAR_REGULATION_OF_SIGNAL_TRANSDUCTION	4/1098	11/18046	0.00318409	0.0229893	0.0172765	LTBP1/FBN1/NRROS/DAND5	4
GO_FACIAL_NERVE_MORPHOGENESIS	GO_FACIAL_NERVE_MORPHOGENESIS	4/1098	11/18046	0.00318409	0.0229893	0.0172765	PLXNA4/NRP2/NRP1/SEMA3A	4
GO_IGG_BINDING	GO_IGG_BINDING	4/1098	11/18046	0.00318409	0.0229893	0.0172765	FCGR2B/FCGR2A/FCGR3A/FCGR1A	4
GO_NATURAL_KILLER_CELL_CHEMOTAXIS	GO_NATURAL_KILLER_CELL_CHEMOTAXIS	4/1098	11/18046	0.00318409	0.0229893	0.0172765	PIK3CG/PIK3CD/CCL2/CCL5	4
GO_POSITIVE_REGULATION_OF_T_CELL_DIFFERENTIATION_IN_THYMUS	GO_POSITIVE_REGULATION_OF_T_CELL_DIFFERENTIATION_IN_THYMUS	4/1098	11/18046	0.00318409	0.0229893	0.0172765	TESPA1/GLI2/RASGRP1/EGR3	4
GO_REGULATION_OF_GLOMERULAR_FILTRATION	GO_REGULATION_OF_GLOMERULAR_FILTRATION	4/1098	11/18046	0.00318409	0.0229893	0.0172765	GJA5/F2R/GJA1/ADORA1	4
GO_RESPONSE_TO_PEPTIDOGLYCAN	GO_RESPONSE_TO_PEPTIDOGLYCAN	4/1098	11/18046	0.00318409	0.0229893	0.0172765	C5AR1/TREM2/NLRP3/IL6	4
GO_SEMAPHORIN_RECEPTOR_COMPLEX	GO_SEMAPHORIN_RECEPTOR_COMPLEX	4/1098	11/18046	0.00318409	0.0229893	0.0172765	PLXNA4/NRP2/PLXNC1/NRP1	4
GO_TYPE_I_INTERFERON_BIOSYNTHETIC_PROCESS	GO_TYPE_I_INTERFERON_BIOSYNTHETIC_PROCESS	4/1098	11/18046	0.00318409	0.0229893	0.0172765	TLR7/TLR9/TLR4/TLR8	4
GO_CGMP_MEDIATED_SIGNALING	GO_CGMP_MEDIATED_SIGNALING	7/1098	33/18046	0.00320336	0.0230322	0.0173088	PRKG1/PDE3A/NPPC/AQP1/HTR2B/APOE/KCNC2	7
GO_METANEPHROS_MORPHOGENESIS	GO_METANEPHROS_MORPHOGENESIS	7/1098	33/18046	0.00320336	0.0230322	0.0173088	GREM1/BASP1/AGTR2/WNT9B/PDGFRB/SIX2/WT1	7
GO_MYELOID_CELL_APOPTOTIC_PROCESS	GO_MYELOID_CELL_APOPTOTIC_PROCESS	7/1098	33/18046	0.00320336	0.0230322	0.0173088	MEF2C/BCL2/PIK3CD/CCR5/CTSL/CCL5/IL6	7
GO_POTASSIUM_CHANNEL_ACTIVITY	GO_POTASSIUM_CHANNEL_ACTIVITY	16/1098	123/18046	0.0032167	0.0230821	0.0173463	KCNN3/KCNMA1/ABCC9/KCNIP1/KCNA1/KCNK12/AQP1/LRRC55/KCNA3/KCND2/GRIK1/KCND3/KCNK13/KCNC2/KCNK4/KCNA6	16
GO_POSITIVE_REGULATION_OF_ION_TRANSMEMBRANE_TRANSPORT	GO_POSITIVE_REGULATION_OF_ION_TRANSMEMBRANE_TRANSPORT	19/1098	157/18046	0.00322366	0.0230821	0.0173463	FLNA/AKAP6/CD19/PLCG2/THY1/CACNA2D1/KCNA1/EHD3/NOS1/F2R/P2RX7/CCL2/RELN/STAC/TREM2/LRRC55/APLNR/AGT/KCNC2	19
GO_PRESYNAPTIC_MEMBRANE	GO_PRESYNAPTIC_MEMBRANE	19/1098	157/18046	0.00322366	0.0230821	0.0173463	IL31RA/HTR2A/ATP2B4/SYT11/KCNA1/IGSF21/DGKI/CNTN1/KCTD12/GRIN2A/RGS7BP/NTNG2/CHRNA6/KCNA3/STX11/PCDH17/ADORA1/GRIK1/KCNC2	19
GO_CHEMOREPELLENT_ACTIVITY	GO_CHEMOREPELLENT_ACTIVITY	6/1098	25/18046	0.00325869	0.0232048	0.0174384	FLRT2/SEMA6B/SEMA3C/SEMA7A/SEMA3A/NRG3	6
GO_EXPLORATION_BEHAVIOR	GO_EXPLORATION_BEHAVIOR	6/1098	25/18046	0.00325869	0.0232048	0.0174384	PENK/TNR/AGTR2/SLC4A10/APOE/GIP	6
GO_FOREBRAIN_NEURON_DEVELOPMENT	GO_FOREBRAIN_NEURON_DEVELOPMENT	6/1098	25/18046	0.00325869	0.0232048	0.0174384	NRP2/ROBO1/NRP1/LHX6/SLC4A10/SEMA3A	6
GO_MHC_PROTEIN_COMPLEX_BINDING	GO_MHC_PROTEIN_COMPLEX_BINDING	6/1098	25/18046	0.00325869	0.0232048	0.0174384	MS4A1/LILRB1/HLA-DMB/HLA-DRA/HLA-DOA/CD74	6
GO_CARDIAC_CONDUCTION	GO_CARDIAC_CONDUCTION	18/1098	146/18046	0.00333893	0.0237435	0.0178433	FLNA/SLC8A1/ATP2B4/ABCC9/CTNNA3/KCNIP1/CACNA2D1/GJC1/EHD3/NPPC/GJA5/NOS1/NKX2-5/FXYD2/GJA1/KCND2/AGT/KCND3	18
GO_DISTAL_AXON	GO_DISTAL_AXON	30/1098	291/18046	0.00334362	0.0237443	0.0178439	DPYSL3/PRKCB/SYT11/MAP1B/ZNF804A/NCS1/PENK/TIMP2/THY1/TNN/KCNA1/NGFR/DGKI/BASP1/NOS1/NRP1/ITGA4/MAPT/KCNA3/SLC4A10/ELAVL4/MYH10/UCN3/ADORA1/TIAM1/KCNC2/RASGRF1/TENM2/KCNA6/LAMP5	30
GO_REGULATION_OF_PHOSPHOLIPID_METABOLIC_PROCESS	GO_REGULATION_OF_PHOSPHOLIPID_METABOLIC_PROCESS	13/1098	91/18046	0.00335265	0.0237758	0.0178676	HTR2A/CD19/CCL19/P2RY12/CCR7/CCL21/PDGFRB/TGFB1/HTR2B/AGAP2/APOC1/SOCS1/APOC2	13
GO_DENDRITIC_CELL_DIFFERENTIATION	GO_DENDRITIC_CELL_DIFFERENTIATION	8/1098	42/18046	0.00339055	0.0239138	0.0179713	AXL/FCGR2B/CCL19/CCR7/NOTCH2/SPI1/TREM2/LILRB1	8
GO_EXTRACELLULAR_MATRIX_ASSEMBLY	GO_EXTRACELLULAR_MATRIX_ASSEMBLY	8/1098	42/18046	0.00339055	0.0239138	0.0179713	MYH11/ANTXR1/LOX/RAMP2/COL1A2/TGFB1/PXDN/AGT	8
GO_T_CELL_MEDIATED_CYTOTOXICITY	GO_T_CELL_MEDIATED_CYTOTOXICITY	8/1098	42/18046	0.00339055	0.0239138	0.0179713	CD1C/FCGR2B/PTPRC/CD1E/P2RX7/LILRB1/IL12B/IL12RB1	8
GO_T_HELPER_1_TYPE_IMMUNE_RESPONSE	GO_T_HELPER_1_TYPE_IMMUNE_RESPONSE	8/1098	42/18046	0.00339055	0.0239138	0.0179713	CCL19/EBI3/SPN/TLR4/JAK3/IL12B/HAVCR2/IL12RB1	8
GO_REGULATION_OF_CALCIUM_ION_TRANSMEMBRANE_TRANSPORT	GO_REGULATION_OF_CALCIUM_ION_TRANSMEMBRANE_TRANSPORT	19/1098	158/18046	0.00346112	0.0243783	0.0183204	SLC8A1/AKAP6/CD19/PIK3CG/PLCG2/CORO1A/CLIC2/TLR9/THY1/CACNA2D1/PRNP/REM1/EHD3/NOS1/F2R/STAC/PDE4B/DYSF/APLNR	19
GO_CAVEOLA	GO_CAVEOLA	12/1098	81/18046	0.00349777	0.024603	0.0184892	HTR2A/KCNMA1/ATP2B4/PTGIS/AKAP6/P2RY12/EHD2/NOS1/F2R/JAK2/CAV2/MLC1	12
GO_CLATHRIN_COATED_VESICLE_MEMBRANE	GO_CLATHRIN_COATED_VESICLE_MEMBRANE	15/1098	113/18046	0.00350623	0.0246292	0.0185089	CD207/DAB2/CD4/CD3G/HLA-DQA2/TYRP1/CD3D/HLA-DQB2/APOE/HLA-DPB1/HLA-DRA/CD74/FCGR1A/HLA-DPA1/HLA-DQA1	15
GO_FICOLIN_1_RICH_GRANULE_MEMBRANE	GO_FICOLIN_1_RICH_GRANULE_MEMBRANE	10/1098	61/18046	0.00352844	0.0247181	0.0185758	DOK3/NCKAP1L/CR1/CLEC4C/ITGB2/SIGLEC5/CD93/FPR1/SIGLEC14/ADGRE3	10
GO_HEART_VALVE_DEVELOPMENT	GO_HEART_VALVE_DEVELOPMENT	10/1098	61/18046	0.00352844	0.0247181	0.0185758	MEF2C/GJA5/ROBO1/HEYL/GATA3/NOTCH2/NFATC1/TGFB1/TGFB2/TWIST1	10
GO_COMPLEMENT_ACTIVATION	GO_COMPLEMENT_ACTIVATION	20/1098	170/18046	0.00354521	0.0248021	0.0186388	CD19/A2M/C4A/C4B/CR1/CR2/C5AR1/C3AR1/IGHV1OR15-1/C3/TRBC2/C1QA/C1QC/C1QB/IGHG4/IGKV2D-30/IGKV2-29/IGHV1-69-2/IGHV3-20/IGKV4-1	20
GO_LAMELLIPODIUM	GO_LAMELLIPODIUM	22/1098	194/18046	0.00361805	0.0252776	0.0189962	MYLK/DPYSL3/PARVA/ACTG2/CORO1A/CTNNA3/ARHGAP31/AMOTL1/MYO1G/ABI3/ITGB3/SWAP70/AIF1/RAC2/ANTXR1/DOCK8/FAP/CD44/DYSF/ABLIM3/CCDC88A/MYH10	22
GO_POSITIVE_REGULATION_OF_LYMPHOCYTE_APOPTOTIC_PROCESS	GO_POSITIVE_REGULATION_OF_LYMPHOCYTE_APOPTOTIC_PROCESS	5/1098	18/18046	0.0036353	0.0253639	0.019061	P2RX7/CD274/CCL5/PDCD1/IDO1	5
GO_UROGENITAL_SYSTEM_DEVELOPMENT	GO_UROGENITAL_SYSTEM_DEVELOPMENT	33/1098	331/18046	0.00365952	0.0254986	0.0191623	MEF2C/GLI3/BCL2/FAT4/FGF1/ADAMTS16/WWTR1/TNC/FBN1/GREM1/BASP1/NFIA/PECAM1/GLI2/HEYL/GATA3/NOTCH2/AGTR2/WNT9B/NRP1/CYP7B1/PDGFRB/SIX2/SULF1/TGFB2/ALDH1A2/GLIS2/WT1/AGT/ENPEP/IRX1/FOXC2/CYP19A1	33
GO_RESPONSE_TO_VITAMIN	GO_RESPONSE_TO_VITAMIN	13/1098	92/18046	0.00369228	0.0256446	0.019272	BCHE/MAP1B/TNC/PENK/FOLR2/SPARC/CD4/COL1A1/HAMP/ALDH1A2/POSTN/SPP1/PHEX	13
GO_SMOOTH_MUSCLE_CELL_MIGRATION	GO_SMOOTH_MUSCLE_CELL_MIGRATION	13/1098	92/18046	0.00369228	0.0256446	0.019272	MEF2C/IGF1/PARVA/BCL2/PRKG1/ITGB3/AIF1/NRP1/PDGFRB/NOX4/POSTN/AGT/CCL5	13
GO_REGULATION_OF_STRESS_ACTIVATED_PROTEIN_KINASE_SIGNALING_CASCADE	GO_REGULATION_OF_STRESS_ACTIVATED_PROTEIN_KINASE_SIGNALING_CASCADE	26/1098	243/18046	0.00369532	0.0256446	0.019272	RASSF2/MDFIC/PJA2/TLR6/MAP4K1/FCGR2B/CCL19/SCIMP/TLR9/SFRP2/CD27/NRK/CCR7/CCL21/CD40LG/SH3RF3/TLR4/DACT1/NCF1/FAS/TGFB2/DUSP10/RASGRP1/TIAM1/BIRC7/SEMA3A	26
GO_RESPONSE_TO_BRONCHODILATOR	GO_RESPONSE_TO_BRONCHODILATOR	9/1098	52/18046	0.00380741	0.0263519	0.0198035	RGS4/CNR2/CCL19/CCR7/GRIN2A/AQP1/DRD5/HDAC9/KCNC2	9
GO_SCAVENGER_RECEPTOR_ACTIVITY	GO_SCAVENGER_RECEPTOR_ACTIVITY	9/1098	52/18046	0.00380741	0.0263519	0.0198035	PRG4/SSC5D/MSR1/CD163L1/CD6/SCARF2/HHIPL1/MEGF10/TMPRSS15	9
GO_MOTOR_NEURON_AXON_GUIDANCE	GO_MOTOR_NEURON_AXON_GUIDANCE	7/1098	34/18046	0.00382569	0.0264432	0.0198721	PLXNA4/RNF165/RAC2/NRP1/NTN3/CHN1/SEMA3A	7
GO_NEGATIVE_REGULATION_OF_CELLULAR_RESPONSE_TO_TRANSFORMING_GROWTH_FACTOR_BETA_STIMULUS	GO_NEGATIVE_REGULATION_OF_CELLULAR_RESPONSE_TO_TRANSFORMING_GROWTH_FACTOR_BETA_STIMULUS	12/1098	82/18046	0.00387605	0.02672	0.0200801	ASPN/LTBP1/FBN1/CHST11/NRROS/LDLRAD4/HTRA1/HTRA3/TGFB1/DAND5/CD109/CAV2	12
GO_REGULATION_OF_CARDIAC_MUSCLE_CONTRACTION	GO_REGULATION_OF_CARDIAC_MUSCLE_CONTRACTION	12/1098	82/18046	0.00387605	0.02672	0.0200801	FLNA/SLC8A1/PIK3CG/CLIC2/CTNNA3/EHD3/GJA5/NOS1/NKX2-5/PDE5A/PDE4B/ADORA1	12
GO_RENAL_SYSTEM_DEVELOPMENT	GO_RENAL_SYSTEM_DEVELOPMENT	30/1098	294/18046	0.00388438	0.0267419	0.0200966	MEF2C/GLI3/BCL2/FAT4/FGF1/ADAMTS16/WWTR1/FBN1/GREM1/BASP1/NFIA/PECAM1/GLI2/HEYL/GATA3/NOTCH2/AGTR2/WNT9B/NRP1/PDGFRB/SIX2/SULF1/TGFB2/ALDH1A2/GLIS2/WT1/AGT/ENPEP/IRX1/FOXC2	30
GO_CELL_CELL_CONTACT_ZONE	GO_CELL_CELL_CONTACT_ZONE	11/1098	72/18046	0.00398684	0.0274109	0.0205993	SLC8A1/AKAP6/CTNNA3/GJC1/ACTN1/GJA5/VCL/PECAM1/HAMP/GJA1/TIAM1	11
GO_ANIMAL_ORGAN_MATURATION	GO_ANIMAL_ORGAN_MATURATION	6/1098	26/18046	0.00402153	0.027431	0.0206145	IGF1/FAT4/GREM1/GATA3/ALDH1A2/PHOSPHO1	6
GO_CHONDROITIN_SULFATE_BIOSYNTHETIC_PROCESS	GO_CHONDROITIN_SULFATE_BIOSYNTHETIC_PROCESS	6/1098	26/18046	0.00402153	0.027431	0.0206145	CSGALNACT2/CHST11/BGN/VCAN/CHSY3/CHST15	6
GO_POSITIVE_REGULATION_OF_DEFENSE_RESPONSE_TO_VIRUS_BY_HOST	GO_POSITIVE_REGULATION_OF_DEFENSE_RESPONSE_TO_VIRUS_BY_HOST	6/1098	26/18046	0.00402153	0.027431	0.0206145	TRIM6/LILRB1/APOBEC3G/IL12B/IL12RB1/AIM2	6
GO_REGULATION_OF_MACROPHAGE_CHEMOTAXIS	GO_REGULATION_OF_MACROPHAGE_CHEMOTAXIS	6/1098	26/18046	0.00402153	0.027431	0.0206145	STAP1/C5AR1/C3AR1/CMKLR1/CCL5/CYP19A1	6
GO_REGULATION_OF_SYSTEMIC_ARTERIAL_BLOOD_PRESSURE_BY_RENIN_ANGIOTENSIN	GO_REGULATION_OF_SYSTEMIC_ARTERIAL_BLOOD_PRESSURE_BY_RENIN_ANGIOTENSIN	6/1098	26/18046	0.00402153	0.027431	0.0206145	SUCNR1/GJA5/F2R/AGTR2/AGT/ENPEP	6
GO_T_CELL_LINEAGE_COMMITMENT	GO_T_CELL_LINEAGE_COMMITMENT	6/1098	26/18046	0.00402153	0.027431	0.0206145	BCL2/SLAMF6/SPN/IL12B/IL12RB1/IL6	6
GO_POSITIVE_REGULATION_OF_EPITHELIAL_CELL_MIGRATION	GO_POSITIVE_REGULATION_OF_EPITHELIAL_CELL_MIGRATION	20/1098	172/18046	0.00405233	0.0276048	0.0207451	FGF7/RHOJ/FGF1/PLCG2/NRP2/ADGRA2/VEGFC/AMOTL1/TAC1/ETS1/SRPX2/ITGB3/SPARC/GATA3/NRP1/TGFB1/TGFB2/HDAC9/AGT/FOXC2	20
GO_POSITIVE_REGULATION_OF_EPITHELIAL_CELL_PROLIFERATION	GO_POSITIVE_REGULATION_OF_EPITHELIAL_CELL_PROLIFERATION	23/1098	208/18046	0.00407642	0.0277325	0.0208411	IGF1/FGF7/THBS4/FGF1/NRP2/VEGFC/ITGB3/HTRA1/NOTCH2/C5AR1/NRP1/ITGA4/CYP7B1/TLR4/DYSF/APLNR/HTR2B/CCL26/CCL5/TWIST1/SCG2/CAV2/EGR3	23
GO_REGULATION_OF_AXONOGENESIS	GO_REGULATION_OF_AXONOGENESIS	21/1098	184/18046	0.00408922	0.0277831	0.0208791	MAP1B/PLXNA4/THY1/NGFR/TNR/ROBO1/PLXNC1/NRP1/ISLR2/MAPT/FN1/SEMA6B/LRRC4C/SEMA3C/CHN1/SEMA7A/APOE/TIAM1/SPP1/SEMA3A/KEL	21
GO_NEGATIVE_REGULATION_OF_TRANSMEMBRANE_RECEPTOR_PROTEIN_SERINE_THREONINE_KINASE_SIGNALING_PATHWAY	GO_NEGATIVE_REGULATION_OF_TRANSMEMBRANE_RECEPTOR_PROTEIN_SERINE_THREONINE_KINASE_SIGNALING_PATHWAY	16/1098	126/18046	0.00409464	0.0277836	0.0208794	ASPN/LTBP1/FBN1/GREM1/SFRP2/CHST11/NRROS/LDLRAD4/HTRA1/HTRA3/TGFB1/FZD1/DAND5/CD109/CAV2/GDF3	16
GO_NEGATIVE_REGULATION_OF_LEUKOCYTE_DIFFERENTIATION	GO_NEGATIVE_REGULATION_OF_LEUKOCYTE_DIFFERENTIATION	14/1098	104/18046	0.00414288	0.0280741	0.0210978	GLI3/DTX1/FCGR2B/FGL2/FBN1/MAFB/TLR4/JAK3/LILRB1/C1QC/INPP5D/LILRB4/SOCS1/CD74	14
GO_DEVELOPMENTAL_GROWTH_INVOLVED_IN_MORPHOGENESIS	GO_DEVELOPMENTAL_GROWTH_INVOLVED_IN_MORPHOGENESIS	25/1098	233/18046	0.00420547	0.028461	0.0213885	MAP1B/FGF1/PLXNA4/TNC/NRP2/SFRP2/SYT4/TNR/VCL/CXCR4/NRP1/ITGA4/ISLR2/CPNE5/MAPT/FN1/SEMA6B/POSTN/SEMA3C/SEMA7A/APOE/TIAM1/SPP1/CPNE6/SEMA3A	25
GO_PERIKARYON	GO_PERIKARYON	17/1098	138/18046	0.00430667	0.029108	0.0218747	MAP1B/CNR2/ITGA1/PENK/KCNA1/NGFR/SORCS2/DRP2/AIF1/RGS8/GLRA3/CPNE5/SLC4A10/ELAVL4/KCND2/KCNC2/CPNE6	17
GO_NEURAL_CREST_CELL_MIGRATION	GO_NEURAL_CREST_CELL_MIGRATION	9/1098	53/18046	0.00434398	0.0293219	0.0220355	NRP2/NRP1/FN1/SEMA6B/SEMA3C/SEMA7A/HTR2B/TWIST1/SEMA3A	9
GO_GASTRULATION	GO_GASTRULATION	21/1098	185/18046	0.00435619	0.029366	0.0220686	COL8A1/SFRP2/ITGB3/MMP2/COL5A1/ITGA4/TENM4/MYADM/SIX2/FN1/ITGB2/COL4A2/GJA1/APLNR/EOMES/COL5A2/CRB2/COL12A1/MIXL1/FOXC2/GDF3	21
GO_REGULATION_OF_ACTIN_FILAMENT_BASED_PROCESS	GO_REGULATION_OF_ACTIN_FILAMENT_BASED_PROCESS	37/1098	387/18046	0.00438585	0.0295276	0.0221901	MEF2C/FLNA/CDC42EP3/RHOJ/STAP1/ARHGDIB/RGS4/WAS/FRMD6/NCKAP1L/CORO1A/EPHA3/CTNNA3/TAC1/GPR65/GJA5/SH3PXD2B/SWAP70/FHOD3/CCR7/RAC2/NOTCH2/CCL21/NRP1/ADD2/MYADM/PDE4B/MAGEL2/PDGFRB/PLEK/NOX4/BST1/CCDC88A/ADORA1/CCL26/TMSB15A/SHANK1	37
GO_CARDIAC_VENTRICLE_MORPHOGENESIS	GO_CARDIAC_VENTRICLE_MORPHOGENESIS	11/1098	73/18046	0.00444234	0.0297683	0.022371	MEF2C/HEG1/SFRP2/NKX2-5/HEYL/GATA3/ENG/TGFB1/TGFB2/SEMA3C/FOXC2	11
GO_POSITIVE_REGULATION_OF_CATION_CHANNEL_ACTIVITY	GO_POSITIVE_REGULATION_OF_CATION_CHANNEL_ACTIVITY	11/1098	73/18046	0.00444234	0.0297683	0.022371	AKAP6/PLCG2/CACNA2D1/KCNA1/EHD3/CCL2/RELN/STAC/TREM2/LRRC55/KCNC2	11
GO_REGULATION_OF_CARDIAC_CONDUCTION	GO_REGULATION_OF_CARDIAC_CONDUCTION	11/1098	73/18046	0.00444234	0.0297683	0.022371	FLNA/SLC8A1/ATP2B4/ABCC9/EHD3/NPPC/GJA5/NOS1/NKX2-5/FXYD2/AGT	11
GO_REGULATION_OF_SYSTEMIC_ARTERIAL_BLOOD_PRESSURE	GO_REGULATION_OF_SYSTEMIC_ARTERIAL_BLOOD_PRESSURE	13/1098	94/18046	0.00445514	0.0297683	0.022371	ADAMTS16/SUCNR1/SPX/GJA5/F2R/AGTR2/SLC2A5/DRD5/GJA1/POSTN/ADORA1/AGT/ENPEP	13
GO_BONE_RESORPTION	GO_BONE_RESORPTION	10/1098	63/18046	0.00448206	0.0297683	0.022371	CTSK/TMEM119/ITGB3/RAC2/P2RX7/NOX4/INPP5D/SPP1/CD38/IL6	10
GO_REGULATION_OF_GLUTAMATE_RECEPTOR_SIGNALING_PATHWAY	GO_REGULATION_OF_GLUTAMATE_RECEPTOR_SIGNALING_PATHWAY	10/1098	63/18046	0.00448206	0.0297683	0.022371	MEF2C/FRRS1L/PRNP/SHISA8/GRIN2A/CCL2/RELN/CNIH2/RASGRF1/SHANK1	10
GO_POSITIVE_REGULATION_OF_TRANSMEMBRANE_RECEPTOR_PROTEIN_SERINE_THREONINE_KINASE_SIGNALING_PATHWAY	GO_POSITIVE_REGULATION_OF_TRANSMEMBRANE_RECEPTOR_PROTEIN_SERINE_THREONINE_KINASE_SIGNALING_PATHWAY	14/1098	105/18046	0.00451971	0.0297683	0.022371	RNF165/ZNF423/BMP3/NOTCH2/ENG/DAB2/TGFB1/CDH5/LEFTY2/SULF1/TGFB2/CRB2/GDF5/GDF3	14
GO_CARDIAC_ATRIUM_DEVELOPMENT	GO_CARDIAC_ATRIUM_DEVELOPMENT	7/1098	35/18046	0.0045356	0.0297683	0.022371	HEG1/GJA5/NKX2-5/NOTCH2/ENG/TGFB2/DAND5	7
GO_NEGATIVE_REGULATION_OF_ANIMAL_ORGAN_MORPHOGENESIS	GO_NEGATIVE_REGULATION_OF_ANIMAL_ORGAN_MORPHOGENESIS	7/1098	35/18046	0.0045356	0.0297683	0.022371	ASPN/BCL2/GREM1/GATA3/SULF1/TGFB2/FOXC2	7
GO_EARLY_PHAGOSOME	GO_EARLY_PHAGOSOME	4/1098	12/18046	0.00454793	0.0297683	0.022371	SYT11/RAB31/TLR7/TLR9	4
GO_GASTRO_INTESTINAL_SYSTEM_SMOOTH_MUSCLE_CONTRACTION	GO_GASTRO_INTESTINAL_SYSTEM_SMOOTH_MUSCLE_CONTRACTION	4/1098	12/18046	0.00454793	0.0297683	0.022371	TACR2/SPX/SULF1/HTR2B	4
GO_KERATAN_SULFATE_CATABOLIC_PROCESS	GO_KERATAN_SULFATE_CATABOLIC_PROCESS	4/1098	12/18046	0.00454793	0.0297683	0.022371	OGN/KERA/LUM/OMD	4
GO_LOCOMOTORY_EXPLORATION_BEHAVIOR	GO_LOCOMOTORY_EXPLORATION_BEHAVIOR	4/1098	12/18046	0.00454793	0.0297683	0.022371	PENK/TNR/SLC4A10/APOE	4
GO_MACROPHAGE_APOPTOTIC_PROCESS	GO_MACROPHAGE_APOPTOTIC_PROCESS	4/1098	12/18046	0.00454793	0.0297683	0.022371	MEF2C/CCR5/CTSL/CCL5	4
GO_NEGATIVE_REGULATION_OF_MACROPHAGE_MIGRATION	GO_NEGATIVE_REGULATION_OF_MACROPHAGE_MIGRATION	4/1098	12/18046	0.00454793	0.0297683	0.022371	STAP1/CD200/CD200R1/CYP19A1	4
GO_PHOSPHOLIPID_EFFLUX	GO_PHOSPHOLIPID_EFFLUX	4/1098	12/18046	0.00454793	0.0297683	0.022371	ABCA1/APOE/APOC1/APOC2	4
GO_POSITIVE_REGULATION_OF_INFLAMMATORY_RESPONSE_TO_ANTIGENIC_STIMULUS	GO_POSITIVE_REGULATION_OF_INFLAMMATORY_RESPONSE_TO_ANTIGENIC_STIMULUS	4/1098	12/18046	0.00454793	0.0297683	0.022371	CD28/CCR7/LTA/C3	4
GO_REGULATION_OF_DENDRITIC_SPINE_MAINTENANCE	GO_REGULATION_OF_DENDRITIC_SPINE_MAINTENANCE	4/1098	12/18046	0.00454793	0.0297683	0.022371	ZNF804A/FCGR2B/PRNP/APOE	4
GO_RESPONSE_TO_BACTERIAL_LIPOPROTEIN	GO_RESPONSE_TO_BACTERIAL_LIPOPROTEIN	4/1098	12/18046	0.00454793	0.0297683	0.022371	SSC5D/TLR6/TLR1/CD14	4
GO_SEMAPHORIN_RECEPTOR_ACTIVITY	GO_SEMAPHORIN_RECEPTOR_ACTIVITY	4/1098	12/18046	0.00454793	0.0297683	0.022371	PLXNA4/NRP2/PLXNC1/NRP1	4
GO_T_HELPER_17_CELL_LINEAGE_COMMITMENT	GO_T_HELPER_17_CELL_LINEAGE_COMMITMENT	4/1098	12/18046	0.00454793	0.0297683	0.022371	SLAMF6/IL12B/IL12RB1/IL6	4
GO_TRIGEMINAL_NERVE_DEVELOPMENT	GO_TRIGEMINAL_NERVE_DEVELOPMENT	4/1098	12/18046	0.00454793	0.0297683	0.022371	PLXNA4/NRP1/TIFAB/SEMA3A	4
GO_ASTROCYTE_DEVELOPMENT	GO_ASTROCYTE_DEVELOPMENT	8/1098	44/18046	0.00457294	0.0297816	0.0223809	VIM/TSPAN2/C5AR1/MAPT/TLR4/TREM2/C1QA/IL6	8
GO_BLOOD_VESSEL_REMODELING	GO_BLOOD_VESSEL_REMODELING	8/1098	44/18046	0.00457294	0.0297816	0.0223809	MEF2C/AXL/BGN/AGTR2/TGFB1/SEMA3C/AGT/FOXC2	8
GO_CEREBRAL_CORTEX_CELL_MIGRATION	GO_CEREBRAL_CORTEX_CELL_MIGRATION	8/1098	44/18046	0.00457294	0.0297816	0.0223809	GLI3/NRP2/P2RY12/ROBO1/RELN/NRP1/LHX6/SEMA3A	8
GO_REGULATION_OF_ENDOCRINE_PROCESS	GO_REGULATION_OF_ENDOCRINE_PROCESS	8/1098	44/18046	0.00457294	0.0297816	0.0223809	TACR2/TAC1/RAB8B/GJA5/F2R/AGTR2/GJA1/AGT	8
GO_CARDIOBLAST_DIFFERENTIATION	GO_CARDIOBLAST_DIFFERENTIATION	5/1098	19/18046	0.00468963	0.0302752	0.0227519	PRICKLE1/GREM1/NKX2-5/TGFB2/EOMES	5
GO_COSTAMERE	GO_COSTAMERE	5/1098	19/18046	0.00468963	0.0302752	0.0227519	FLNC/SYNM/VCL/AHNAK2/SMPX	5
GO_DENSE_CORE_GRANULE	GO_DENSE_CORE_GRANULE	5/1098	19/18046	0.00468963	0.0302752	0.0227519	NCS1/PENK/SYT4/SPX/SCG2	5
GO_NEGATIVE_REGULATION_OF_LEUKOCYTE_CHEMOTAXIS	GO_NEGATIVE_REGULATION_OF_LEUKOCYTE_CHEMOTAXIS	5/1098	19/18046	0.00468963	0.0302752	0.0227519	STAP1/GREM1/GPR18/CCL2/CYP19A1	5
GO_PODOSOME_ASSEMBLY	GO_PODOSOME_ASSEMBLY	5/1098	19/18046	0.00468963	0.0302752	0.0227519	MSN/LCP1/SH3PXD2B/BIN2/IL5	5
GO_POSITIVE_REGULATION_OF_ALPHA_BETA_T_CELL_PROLIFERATION	GO_POSITIVE_REGULATION_OF_ALPHA_BETA_T_CELL_PROLIFERATION	5/1098	19/18046	0.00468963	0.0302752	0.0227519	PTPRC/EBI3/CD28/IL12B/CD3E	5
GO_REGULATION_OF_SYSTEMIC_ARTERIAL_BLOOD_PRESSURE_BY_CIRCULATORY_RENIN_ANGIOTENSIN	GO_REGULATION_OF_SYSTEMIC_ARTERIAL_BLOOD_PRESSURE_BY_CIRCULATORY_RENIN_ANGIOTENSIN	5/1098	19/18046	0.00468963	0.0302752	0.0227519	SUCNR1/GJA5/F2R/AGTR2/ENPEP	5
GO_ENDOCRINE_PROCESS	GO_ENDOCRINE_PROCESS	12/1098	84/18046	0.0047311	0.030505	0.0229246	TACR2/TAC1/SUCNR1/RAB8B/GJA5/F2R/GATA3/AGTR2/DRD5/GJA1/AGT/ENPEP	12
GO_POSITIVE_REGULATION_OF_ENDOTHELIAL_CELL_MIGRATION	GO_POSITIVE_REGULATION_OF_ENDOTHELIAL_CELL_MIGRATION	16/1098	128/18046	0.00478228	0.0307291	0.023093	RHOJ/FGF1/NRP2/ADGRA2/VEGFC/AMOTL1/ETS1/SRPX2/ITGB3/SPARC/GATA3/NRP1/TGFB1/HDAC9/AGT/FOXC2	16
GO_BRANCHING_MORPHOGENESIS_OF_AN_EPITHELIAL_TUBE	GO_BRANCHING_MORPHOGENESIS_OF_AN_EPITHELIAL_TUBE	18/1098	151/18046	0.00478364	0.0307291	0.023093	GLI3/BCL2/FAT4/FGF1/ADAMTS16/TNC/GREM1/EDNRA/SFRP2/GLI2/AGTR2/WNT9B/ENG/NRP1/SIX2/WT1/AGT/FOXC2	18
GO_HINDBRAIN_DEVELOPMENT	GO_HINDBRAIN_DEVELOPMENT	18/1098	151/18046	0.00478364	0.0307291	0.023093	FLNA/BCL2/FCGR2B/MAFB/CNTN1/SEZ6L/AIF1/GLI2/C5AR1/AGTR2/SERPINE2/CEND1/ALDH1A2/MYH10/CD3E/NLGN4X/MYO16/SEZ6	18
GO_ANATOMICAL_STRUCTURE_MATURATION	GO_ANATOMICAL_STRUCTURE_MATURATION	19/1098	163/18046	0.00487716	0.0312804	0.0235073	IGF1/LYL1/BCL2/FAT4/GREM1/CX3CR1/PDE3A/NPPC/MMP2/GATA3/CDH5/C3/DAZL/TGFB2/CEND1/ALDH1A2/PHOSPHO1/C1QA/FEV	19
GO_REGULATION_OF_PHAGOCYTOSIS	GO_REGULATION_OF_PHAGOCYTOSIS	13/1098	95/18046	0.00488152	0.0312804	0.0235073	SYT11/STAP1/FCGR2B/NCKAP1L/RAB31/C4A/PTPRC/C4B/CCL2/TREM2/DYSF/CAMK1D/C3	13
GO_NEGATIVE_REGULATION_OF_OSTEOCLAST_DIFFERENTIATION	GO_NEGATIVE_REGULATION_OF_OSTEOCLAST_DIFFERENTIATION	6/1098	27/18046	0.00490875	0.0313073	0.0235275	FBN1/MAFB/TLR4/LILRB1/INPP5D/LILRB4	6
GO_POSITIVE_REGULATION_OF_OSTEOCLAST_DIFFERENTIATION	GO_POSITIVE_REGULATION_OF_OSTEOCLAST_DIFFERENTIATION	6/1098	27/18046	0.00490875	0.0313073	0.0235275	NOTCH2/TYROBP/TREM2/IL12B/CCR1/SLC9B2	6
GO_POSITIVE_REGULATION_OF_T_CELL_MEDIATED_CYTOTOXICITY	GO_POSITIVE_REGULATION_OF_T_CELL_MEDIATED_CYTOTOXICITY	6/1098	27/18046	0.00490875	0.0313073	0.0235275	CD1C/PTPRC/CD1E/P2RX7/IL12B/IL12RB1	6
GO_MORPHOGENESIS_OF_A_BRANCHING_STRUCTURE	GO_MORPHOGENESIS_OF_A_BRANCHING_STRUCTURE	22/1098	199/18046	0.00490988	0.0313073	0.0235275	GLI3/FGF7/BCL2/FAT4/FGF1/ADAMTS16/TNC/GREM1/EDNRA/SFRP2/GLI2/AGTR2/WNT9B/ENG/NRP1/SIX2/SULF1/SEMA3C/WT1/AGT/FOXC2/SEMA3A	22
GO_CELL_GROWTH	GO_CELL_GROWTH	44/1098	483/18046	0.00491656	0.0313114	0.0235306	IGF1/MAP1B/BCL2/AKAP6/RGS4/PLXNA4/IGFBP7/GREM1/NRP2/FRZB/SFRP2/SYT4/TNR/PTCH2/IGFBP4/VCL/SPOCK1/AGTR2/CXCR4/EPB41L3/NRP1/ITGA4/ISLR2/CPNE5/TGFB1/MAPT/FN1/SERPINE2/HAMP/GJA1/SEMA6B/TGFB2/POSTN/SEMA3C/SEMA7A/APOE/WT1/AGT/TIAM1/SPP1/CD38/CPNE6/SEMA3A/NRG3	44
GO_NEURON_PROJECTION_TERMINUS	GO_NEURON_PROJECTION_TERMINUS	17/1098	140/18046	0.00498675	0.0317194	0.0238372	PRKCB/SYT11/SCRG1/NCS1/PENK/TNN/KCNA1/SYT4/DGKI/NOS1/KCNA3/SLC4A10/UCN3/ADORA1/KCNC2/UCHL1/KCNA6	17
GO_NEGATIVE_REGULATION_OF_BLOOD_VESSEL_DIAMETER	GO_NEGATIVE_REGULATION_OF_BLOOD_VESSEL_DIAMETER	12/1098	85/18046	0.00521173	0.0331098	0.0248821	HTR2A/SLC8A1/EDNRA/GJA5/F2R/DRD5/GJA1/HTR2B/ADORA1/AGT/CD38/KEL	12
GO_REGULATION_OF_RAS_PROTEIN_SIGNAL_TRANSDUCTION	GO_REGULATION_OF_RAS_PROTEIN_SIGNAL_TRANSDUCTION	25/1098	237/18046	0.00523194	0.0331975	0.024948	IGF1/P2RY8/ARHGDIB/LPAR4/HEG1/GPR18/TIMP2/VAV1/COL3A1/DGKI/GPR65/P2RY10/ABCA1/ROBO1/F2R/NOTCH2/NRP1/PDGFRB/RASGRF2/TGFB2/APOE/JAK2/RASGRP1/TIAM1/RASGRF1	25
GO_AUTONOMIC_NERVOUS_SYSTEM_DEVELOPMENT	GO_AUTONOMIC_NERVOUS_SYSTEM_DEVELOPMENT	8/1098	45/18046	0.00527143	0.0334072	0.0251056	PLXNA4/NRP2/EDNRA/VCAM1/GATA3/NRP1/FN1/SEMA3A	8
GO_POSITIVE_REGULATION_OF_NEURON_DEATH	GO_POSITIVE_REGULATION_OF_NEURON_DEATH	13/1098	96/18046	0.00534005	0.0335984	0.0252493	TLR6/FCGR2B/ITGA1/PRNP/TYROBP/MAPT/TLR4/ITGB2/TGFB2/KMO/C1QA/ADORA1/ITGAM	13
GO_VASCULAR_ENDOTHELIAL_GROWTH_FACTOR_RECEPTOR_SIGNALING_PATHWAY	GO_VASCULAR_ENDOTHELIAL_GROWTH_FACTOR_RECEPTOR_SIGNALING_PATHWAY	13/1098	96/18046	0.00534005	0.0335984	0.0252493	PRKCB/AXL/NCKAP1L/ELMO1/NRP2/VEGFC/VAV1/ITGB3/NRP1/NCF1/CYBB/SULF1/FOXC2	13
GO_NEURON_PROJECTION_EXTENSION_INVOLVED_IN_NEURON_PROJECTION_GUIDANCE	GO_NEURON_PROJECTION_EXTENSION_INVOLVED_IN_NEURON_PROJECTION_GUIDANCE	7/1098	36/18046	0.00534049	0.0335984	0.0252493	PLXNA4/NRP2/NRP1/SEMA6B/SEMA3C/SEMA7A/SEMA3A	7
GO_RECEPTOR_SIGNALING_COMPLEX_ADAPTOR_ACTIVITY	GO_RECEPTOR_SIGNALING_COMPLEX_ADAPTOR_ACTIVITY	7/1098	36/18046	0.00534049	0.0335984	0.0252493	STAP1/SH2B2/TRAT1/CD3G/DOK2/CD3E/SHANK1	7
GO_REGULATION_OF_SUPEROXIDE_METABOLIC_PROCESS	GO_REGULATION_OF_SUPEROXIDE_METABOLIC_PROCESS	7/1098	36/18046	0.00534049	0.0335984	0.0252493	TGFB1/TYROBP/MAPT/ITGB2/BST1/AGT/ITGAM	7
GO_RESPONSE_TO_FLUID_SHEAR_STRESS	GO_RESPONSE_TO_FLUID_SHEAR_STRESS	7/1098	36/18046	0.00534049	0.0335984	0.0252493	MEF2C/ABCA1/ETS1/P2RX7/PDGFRB/GJA1/TFPI2	7
GO_EPITHELIAL_TO_MESENCHYMAL_TRANSITION	GO_EPITHELIAL_TO_MESENCHYMAL_TRANSITION	17/1098	141/18046	0.00535832	0.0336697	0.0253029	WWTR1/EPHA3/GREM1/SFRP2/LDLRAD4/HEYL/ENG/DAB2/TGFB1/COL1A1/TGFB2/EOMES/CRB2/FAM83D/TWIST1/TIAM1/IL6	17
GO_EPITHELIAL_TUBE_MORPHOGENESIS	GO_EPITHELIAL_TUBE_MORPHOGENESIS	32/1098	327/18046	0.00549334	0.0344763	0.0259091	MEF2C/GLI3/PRICKLE1/BCL2/FAT4/FGF1/ADAMTS16/TNC/GREM1/EDNRA/SFRP2/NKX2-5/GLI2/GATA3/NOTCH2/AGTR2/CXCR4/WNT9B/ENG/NRP1/SIX2/TGFB1/MICAL2/FZD1/TGFB2/EOMES/WT1/AGT/IRX1/TWIST1/CTHRC1/FOXC2	32
GO_CARDIAC_VENTRICLE_DEVELOPMENT	GO_CARDIAC_VENTRICLE_DEVELOPMENT	16/1098	130/18046	0.00556123	0.0348603	0.0261976	MEF2C/LTBP1/HEG1/SFRP2/GJA5/ROBO1/NKX2-5/HEYL/GATA3/ENG/TGFB1/FZD1/TGFB2/SEMA3C/DAND5/FOXC2	16
GO_PATHWAY_RESTRICTED_SMAD_PROTEIN_PHOSPHORYLATION	GO_PATHWAY_RESTRICTED_SMAD_PROTEIN_PHOSPHORYLATION	10/1098	65/18046	0.00562764	0.0352339	0.0264784	GREM1/LDLRAD4/BMP3/ENG/DAB2/TGFB1/LEFTY2/TGFB2/GDF5/GDF3	10
GO_POSITIVE_REGULATION_OF_NEURON_PROJECTION_DEVELOPMENT	GO_POSITIVE_REGULATION_OF_NEURON_PROJECTION_DEVELOPMENT	29/1098	289/18046	0.00565085	0.0353366	0.0265555	DPYSL3/MAP1B/ZNF804A/PLXNA4/EPHA3/ARSB/SYT4/NGFR/CNTN1/ROBO1/CXCR4/PLXNC1/RELN/NRP1/ISLR2/CPNE5/MAPT/FN1/CAMK1D/FZD1/IL1RAPL1/SEMA7A/APOE/AGT/TIAM1/CPNE6/TENM3/SHANK1/NDNF	29
GO_LONG_TERM_SYNAPTIC_POTENTIATION	GO_LONG_TERM_SYNAPTIC_POTENTIATION	12/1098	86/18046	0.00573044	0.0357911	0.0268971	CX3CR1/PRNP/TNR/GRIN2A/RELN/TYROBP/SERPINE2/APOE/ADORA1/CALB2/GIP/SHANK1	12
GO_REGULATION_OF_STRIATED_MUSCLE_CONTRACTION	GO_REGULATION_OF_STRIATED_MUSCLE_CONTRACTION	13/1098	97/18046	0.00583241	0.0363842	0.0273428	FLNA/SLC8A1/PIK3CG/CLIC2/CTNNA3/EHD3/GJA5/NOS1/MYBPH/NKX2-5/PDE5A/PDE4B/ADORA1	13
GO_NEGATIVE_REGULATION_OF_PEPTIDE_SECRETION	GO_NEGATIVE_REGULATION_OF_PEPTIDE_SECRETION	18/1098	154/18046	0.00587311	0.036594	0.0275005	SSC5D/CD22/SYT11/TLR6/FCGR2B/SYT4/CD200/BANK1/F2R/SRGN/CD200R1/FN1/LILRB1/HDAC9/APOE/NLRP3/TLR8/CD74	18
GO_REGULATION_OF_TRANSPORTER_ACTIVITY	GO_REGULATION_OF_TRANSPORTER_ACTIVITY	29/1098	290/18046	0.00592559	0.0366402	0.0275352	MEF2C/BCL2/AKAP6/PLCG2/CLIC2/TLR9/CACNA2D1/KCNA1/SLMAP/PRNP/REM1/EHD3/SHISA8/NOS1/FXYD2/GRIN2A/CCL2/RELN/STAC/PDE4B/TREM2/DYSF/LRRC55/GJA1/CNIH2/TWIST1/KCNC2/RASGRF1/SHANK1	29
GO_NEGATIVE_REGULATION_OF_MUSCLE_CONTRACTION	GO_NEGATIVE_REGULATION_OF_MUSCLE_CONTRACTION	6/1098	28/18046	0.00593163	0.0366402	0.0275352	KCNMA1/PRKG1/PIK3CG/PDE5A/CALCRL/ADORA1	6
GO_RENAL_SYSTEM_VASCULATURE_DEVELOPMENT	GO_RENAL_SYSTEM_VASCULATURE_DEVELOPMENT	6/1098	28/18046	0.00593163	0.0366402	0.0275352	PECAM1/NOTCH2/NRP1/PDGFRB/WT1/FOXC2	6
GO_ENDOLYSOSOME	GO_ENDOLYSOSOME	5/1098	20/18046	0.00594414	0.0366402	0.0275352	TLR7/TLR9/CTSK/CTSL/TLR8	5
GO_G_PROTEIN_BETA_SUBUNIT_BINDING	GO_G_PROTEIN_BETA_SUBUNIT_BINDING	5/1098	20/18046	0.00594414	0.0366402	0.0275352	GNG2/GNG13/GNGT2/F2R/RASD2	5
GO_NEGATIVE_REGULATION_OF_T_CELL_RECEPTOR_SIGNALING_PATHWAY	GO_NEGATIVE_REGULATION_OF_T_CELL_RECEPTOR_SIGNALING_PATHWAY	5/1098	20/18046	0.00594414	0.0366402	0.0275352	THY1/PVRIG/PRNP/UBASH3A/LILRB4	5
GO_NITRIC_OXIDE_SYNTHASE_BIOSYNTHETIC_PROCESS	GO_NITRIC_OXIDE_SYNTHASE_BIOSYNTHETIC_PROCESS	5/1098	20/18046	0.00594414	0.0366402	0.0275352	FCER2/TLR9/CCL2/TLR4/JAK2	5
GO_OSTEOCLAST_DEVELOPMENT	GO_OSTEOCLAST_DEVELOPMENT	5/1098	20/18046	0.00594414	0.0366402	0.0275352	FBN1/NOTCH2/TYROBP/LILRB1/SLC9B2	5
GO_POSITIVE_REGULATION_OF_CYTOKINE_PRODUCTION_INVOLVED_IN_INFLAMMATORY_RESPONSE	GO_POSITIVE_REGULATION_OF_CYTOKINE_PRODUCTION_INVOLVED_IN_INFLAMMATORY_RESPONSE	5/1098	20/18046	0.00594414	0.0366402	0.0275352	TLR6/GPSM3/CD6/TLR4/GBP5	5
GO_SH3_DOMAIN_BINDING	GO_SH3_DOMAIN_BINDING	16/1098	131/18046	0.0059876	0.0368643	0.0277036	DTX1/DPYSL3/WIPF1/SH3BGRL/WAS/ELMO1/ADAM19/ARHGAP31/ABI3/MAPT/NCF1/GJA1/INPP5D/CD3E/ADAM12/SHANK1	16
GO_CARBOXYPEPTIDASE_ACTIVITY	GO_CARBOXYPEPTIDASE_ACTIVITY	8/1098	46/18046	0.0060485	0.0371509	0.027919	CPXM2/CPXM1/AEBP1/CPZ/VASH1/FOLH1/CPA1/FOLH1B	8
GO_REGULATION_OF_ACUTE_INFLAMMATORY_RESPONSE	GO_REGULATION_OF_ACUTE_INFLAMMATORY_RESPONSE	8/1098	46/18046	0.0060485	0.0371509	0.027919	FCGR2B/PIK3CG/TAC1/CCR7/C3/ADORA1/NLRP3/IL6	8
GO_POSITIVE_REGULATION_OF_GLIOGENESIS	GO_POSITIVE_REGULATION_OF_GLIOGENESIS	11/1098	76/18046	0.00606086	0.0371828	0.027943	CX3CR1/P2RY12/LTA/CXCR4/TENM4/TGFB1/TREM2/SERPINE2/IL34/TIAM1/IL6	11
GO_ACTIN_FILAMENT_BASED_MOVEMENT	GO_ACTIN_FILAMENT_BASED_MOVEMENT	17/1098	143/18046	0.00616916	0.0378025	0.0284087	SGCD/FLNA/PARVA/WIPF1/VIM/WAS/FRMD6/MYBPC2/CTNNA3/CACNA2D1/GJC1/GJA5/PDE4B/GJA1/MYH10/ADORA1/KCND3	17
GO_AMYLOID_BETA_CLEARANCE	GO_AMYLOID_BETA_CLEARANCE	7/1098	37/18046	0.00624785	0.0378873	0.0284724	MSR1/C5AR1/TREM2/ITGB2/C3/APOE/ITGAM	7
GO_MONONUCLEAR_CELL_DIFFERENTIATION	GO_MONONUCLEAR_CELL_DIFFERENTIATION	7/1098	37/18046	0.00624785	0.0378873	0.0284724	MEF2C/IL31RA/IFI16/CD4/INPP5D/IL34/CD74	7
GO_CDC42_PROTEIN_SIGNAL_TRANSDUCTION	GO_CDC42_PROTEIN_SIGNAL_TRANSDUCTION	4/1098	13/18046	0.00625608	0.0378873	0.0284724	WAS/ABCA1/NRP1/APOE	4
GO_GAP_JUNCTION_ASSEMBLY	GO_GAP_JUNCTION_ASSEMBLY	4/1098	13/18046	0.00625608	0.0378873	0.0284724	GJC1/GJA5/GJA1/AGT	4
GO_INFLAMMATORY_RESPONSE_TO_WOUNDING	GO_INFLAMMATORY_RESPONSE_TO_WOUNDING	4/1098	13/18046	0.00625608	0.0378873	0.0284724	SIGLEC10/F2R/TIMP1/TGFB1	4
GO_MAST_CELL_MIGRATION	GO_MAST_CELL_MIGRATION	4/1098	13/18046	0.00625608	0.0378873	0.0284724	VEGFC/PIK3CD/SWAP70/RAC2	4
GO_NEGATIVE_REGULATION_OF_AMYLOID_BETA_FORMATION	GO_NEGATIVE_REGULATION_OF_AMYLOID_BETA_FORMATION	4/1098	13/18046	0.00625608	0.0378873	0.0284724	IGF1/SPON1/PRNP/APOE	4
GO_POSITIVE_REGULATION_OF_GLIAL_CELL_MIGRATION	GO_POSITIVE_REGULATION_OF_GLIAL_CELL_MIGRATION	4/1098	13/18046	0.00625608	0.0378873	0.0284724	CX3CR1/P2RY12/TREM2/TIAM1	4
GO_TRANSMEMBRANE_RECEPTOR_PROTEIN_TYROSINE_KINASE_ADAPTOR_ACTIVITY	GO_TRANSMEMBRANE_RECEPTOR_PROTEIN_TYROSINE_KINASE_ADAPTOR_ACTIVITY	4/1098	13/18046	0.00625608	0.0378873	0.0284724	STAP1/SH2B2/TRAT1/DOK2	4
GO_VASCULAR_ENDOTHELIAL_GROWTH_FACTOR_RECEPTOR_BINDING	GO_VASCULAR_ENDOTHELIAL_GROWTH_FACTOR_RECEPTOR_BINDING	4/1098	13/18046	0.00625608	0.0378873	0.0284724	GREM1/VEGFC/ITGB3/CDH5	4
GO_CHEMOKINE_RECEPTOR_BINDING	GO_CHEMOKINE_RECEPTOR_BINDING	10/1098	66/18046	0.00628008	0.037944	0.028515	CCL19/CXCL13/CCL2/CCL21/CCL13/CCL26/CCL22/CCL5/CCL17/XCL2	10
GO_REGULATION_OF_NITRIC_OXIDE_BIOSYNTHETIC_PROCESS	GO_REGULATION_OF_NITRIC_OXIDE_BIOSYNTHETIC_PROCESS	10/1098	66/18046	0.00628008	0.037944	0.028515	ATP2B4/PTGIS/TLR6/CX3CR1/AIF1/AGTR2/TLR4/ITGB2/AGT/JAK2	10
GO_CHEMICAL_SYNAPTIC_TRANSMISSION_POSTSYNAPTIC	GO_CHEMICAL_SYNAPTIC_TRANSMISSION_POSTSYNAPTIC	14/1098	109/18046	0.00631373	0.0380905	0.0286251	MEF2C/RGS4/CHRNA3/DGKI/P2RX7/GRIN2A/GLRA3/RELN/CHRNB4/CHRNA6/ADORA1/NLGN4X/SEZ6/SHANK1	14
GO_REGULATION_OF_CELL_SIZE	GO_REGULATION_OF_CELL_SIZE	20/1098	179/18046	0.00632364	0.0380905	0.0286251	KCNMA1/MAP1B/MSN/PLXNA4/VAV1/TNR/P2RX7/NRP1/ISLR2/MAPT/AQP1/FN1/PLEK/SEMA6B/SEMA3C/SEMA7A/APOE/SPP1/SEMA3A/KEL	20
GO_NEGATIVE_REGULATION_OF_EPITHELIAL_CELL_PROLIFERATION	GO_NEGATIVE_REGULATION_OF_EPITHELIAL_CELL_PROLIFERATION	19/1098	167/18046	0.00632638	0.0380905	0.0286251	MEF2C/SFRP2/NGFR/NLRC3/VASH1/ROBO1/SPARC/GATA3/CCL2/TGFB1/SULF1/GJA1/TGFB2/DUSP10/APOE/CD109/GDF5/SCG2/CAV2	19
GO_FOREBRAIN_DEVELOPMENT	GO_FOREBRAIN_DEVELOPMENT	36/1098	383/18046	0.00639899	0.0384831	0.0289201	GLI3/FLNA/SLC8A1/ATP2B4/PRKG1/FAT4/AXL/PLXNA4/NRP2/P2RY12/CDON/KCNA1/COL3A1/TNR/ETS1/ROBO1/PAX5/GLI2/ALDH1A3/CXCR4/RELN/NRP1/HOOK3/TYROBP/LHX6/AQP1/SLC4A10/EOMES/ALDH1A2/SEMA7A/MYH10/POU3F1/KCNC2/ITGAM/SEMA3A/NRG3	36
GO_JNK_CASCADE	GO_JNK_CASCADE	23/1098	216/18046	0.00643931	0.0386806	0.0290686	RASSF2/MDFIC/PJA2/TLR6/MAP4K1/FCGR2B/CCL19/TLR9/SFRP2/CD27/NRK/CCR7/CCL21/CD40LG/SH3RF3/TLR4/DACT1/NCF1/DUSP10/RASGRP1/TIAM1/BIRC7/SEMA3A	23
GO_REGULATION_OF_EPITHELIAL_CELL_MIGRATION	GO_REGULATION_OF_EPITHELIAL_CELL_MIGRATION	29/1098	292/18046	0.00650856	0.0390514	0.0293472	MEF2C/FGF7/MEOX2/RHOJ/FGF1/PLCG2/NRP2/ARSB/ADGRA2/VEGFC/AMOTL1/TAC1/ETS1/SRPX2/ITGB3/VASH1/SPARC/CXCL13/GATA3/AGTR2/NRP1/TGFB1/TGFB2/DUSP10/HDAC9/APOE/AGT/FOXC2/SEMA3A	29
GO_NEGATIVE_REGULATION_OF_ESTABLISHMENT_OF_PROTEIN_LOCALIZATION	GO_NEGATIVE_REGULATION_OF_ESTABLISHMENT_OF_PROTEIN_LOCALIZATION	22/1098	204/18046	0.00656274	0.0392855	0.0295232	SSC5D/RAB23/CD22/SYT11/MDFIC/TLR6/FCGR2B/SYT4/CD200/BANK1/F2R/PKIA/MAPT/SRGN/CD200R1/FN1/LILRB1/SIAH3/HDAC9/APOE/NLRP3/TLR8	22
GO_POSITIVE_REGULATION_OF_TRANSMEMBRANE_TRANSPORT	GO_POSITIVE_REGULATION_OF_TRANSMEMBRANE_TRANSPORT	22/1098	204/18046	0.00656274	0.0392855	0.0295232	IGF1/FLNA/AKAP6/CD19/PLCG2/THY1/CACNA2D1/KCNA1/EHD3/NOS1/F2R/P2RX7/CCL2/RELN/STAC/TREM2/LRRC55/C3/APLNR/AGT/KCNC2/GIP	22
GO_POSITIVE_REGULATION_OF_NIK_NF_KAPPAB_SIGNALING	GO_POSITIVE_REGULATION_OF_NIK_NF_KAPPAB_SIGNALING	11/1098	77/18046	0.00669263	0.0400168	0.0300727	TLR6/CCL19/GREM1/TLR7/TLR9/CD27/TLR4/TREM2/IL12B/CD14/HAVCR2	11
GO_REGULATION_OF_CELL_SHAPE	GO_REGULATION_OF_CELL_SHAPE	18/1098	156/18046	0.00670588	0.0400499	0.0300976	CDC42EP3/PARVA/RHOJ/ARHGAP15/MSN/PLXNA4/FMNL3/CORO1A/FMNL1/RAC2/CCL2/EPB41L3/PLXNC1/LST1/FN1/ITGB2/CCL13/MYH10	18
GO_RESPONSE_TO_ACID_CHEMICAL	GO_RESPONSE_TO_ACID_CHEMICAL	33/1098	345/18046	0.00681734	0.0406687	0.0305626	BCHE/ZEB1/GNG2/ATP2B4/IGFBP7/CCL19/TNC/EPHA3/FOLR2/COL3A1/BRINP2/ABCA1/MMP2/CCR7/SPARC/SESN3/WNT9B/CCL21/GLRA3/COL1A2/PDGFRB/AQP1/COL1A1/CYBB/HAMP/GJA1/ALDH1A2/COL5A2/BRINP3/SOCS1/CD38/KCNK4/GIP	33
GO_INTERFERON_GAMMA_MEDIATED_SIGNALING_PATHWAY	GO_INTERFERON_GAMMA_MEDIATED_SIGNALING_PATHWAY	12/1098	88/18046	0.00689026	0.0410565	0.030854	VCAM1/CD44/HLA-DQA2/HLA-DQB2/CIITA/HLA-DPB1/JAK2/HLA-DRA/SOCS1/FCGR1A/HLA-DPA1/HLA-DQA1	12
GO_ACTION_POTENTIAL	GO_ACTION_POTENTIAL	16/1098	133/18046	0.00691962	0.0411248	0.0309054	FLNA/SLC8A1/AKAP6/CNR2/GPR88/CTNNA3/CACNA2D1/KCNA1/GJC1/SLMAP/TAC1/GJA5/CHRNB4/GJA1/KCND2/KCND3	16
GO_ENTRY_INTO_HOST	GO_ENTRY_INTO_HOST	16/1098	133/18046	0.00691962	0.0411248	0.0309054	HTR2A/AXL/LGALS1/ITGB3/CR1/CR2/CXCR4/CD4/CCR5/CD86/SELPLG/MRC1/CD209/CD74/CAV2/ANPEP	16
GO_SIGNALING_ADAPTOR_ACTIVITY	GO_SIGNALING_ADAPTOR_ACTIVITY	13/1098	99/18046	0.00692552	0.0411248	0.0309054	STAP1/SH3BGRL/CD28/SH2B2/SH2D1A/TRAT1/GRAP/CD3G/DOK2/CHN1/CD3E/CLNK/SHANK1	13
GO_LEARNING	GO_LEARNING	17/1098	145/18046	0.00707677	0.0418338	0.0314382	BCHE/MAP1A/SYT11/NRXN2/TACR2/GPR88/NRXN3/TAC1/DGKI/TNR/GRIN2A/RELN/DRD5/AGT/NLGN4X/LRRN4/SHANK1	17
GO_IMMUNOGLOBULIN_PRODUCTION_INVOLVED_IN_IMMUNOGLOBULIN_MEDIATED_IMMUNE_RESPONSE	GO_IMMUNOGLOBULIN_PRODUCTION_INVOLVED_IN_IMMUNOGLOBULIN_MEDIATED_IMMUNE_RESPONSE	9/1098	57/18046	0.00710132	0.0418338	0.0314382	GAPT/POU2F2/FGL2/PTPRC/SWAP70/CD28/CD40LG/TGFB1/AICDA	9
GO_HOMEOSTASIS_OF_NUMBER_OF_CELLS_WITHIN_A_TISSUE	GO_HOMEOSTASIS_OF_NUMBER_OF_CELLS_WITHIN_A_TISSUE	6/1098	29/18046	0.00710141	0.0418338	0.0314382	BCL2/SASH3/CORO1A/F2R/P2RX7/ILDR2	6
GO_INSULIN_LIKE_GROWTH_FACTOR_BINDING	GO_INSULIN_LIKE_GROWTH_FACTOR_BINDING	6/1098	29/18046	0.00710141	0.0418338	0.0314382	IGFBP7/IGFBP4/ITGB3/HTRA1/CRIM1/HTRA3	6
GO_NEGATIVE_REGULATION_OF_CARTILAGE_DEVELOPMENT	GO_NEGATIVE_REGULATION_OF_CARTILAGE_DEVELOPMENT	6/1098	29/18046	0.00710141	0.0418338	0.0314382	GREM1/FRZB/NKX3-2/CTSK/GLI2/GDF5	6
GO_POSITIVE_REGULATION_OF_CARDIAC_MUSCLE_CELL_DIFFERENTIATION	GO_POSITIVE_REGULATION_OF_CARDIAC_MUSCLE_CELL_DIFFERENTIATION	6/1098	29/18046	0.00710141	0.0418338	0.0314382	MEF2C/IGF1/AKAP6/GREM1/TGFB1/HAMP	6
GO_POSITIVE_REGULATION_OF_VASCULAR_ENDOTHELIAL_GROWTH_FACTOR_PRODUCTION	GO_POSITIVE_REGULATION_OF_VASCULAR_ENDOTHELIAL_GROWTH_FACTOR_PRODUCTION	6/1098	29/18046	0.00710141	0.0418338	0.0314382	C5AR1/C3AR1/TGFB1/C3/SULF1/IL6	6
GO_GLAND_MORPHOGENESIS	GO_GLAND_MORPHOGENESIS	15/1098	122/18046	0.00719065	0.0423114	0.0317971	GLI3/FGF7/BCL2/MSN/TNC/GLI2/NOTCH2/NRP1/CYP7B1/TGFB1/SULF1/TGFB2/SEMA3C/SEMA3A/NRG3	15
GO_MACROPHAGE_CHEMOTAXIS	GO_MACROPHAGE_CHEMOTAXIS	7/1098	38/18046	0.00726523	0.042557	0.0319817	STAP1/C5AR1/CCL2/C3AR1/CMKLR1/CCL5/CYP19A1	7
GO_POSITIVE_REGULATION_OF_CYTOSOLIC_CALCIUM_ION_CONCENTRATION_INVOLVED_IN_PHOSPHOLIPASE_C_ACTIVATING_G_PROTEIN_COUPLED_SIGNALING_PATHWAY	GO_POSITIVE_REGULATION_OF_CYTOSOLIC_CALCIUM_ION_CONCENTRATION_INVOLVED_IN_PHOSPHOLIPASE_C_ACTIVATING_G_PROTEIN_COUPLED_SIGNALING_PATHWAY	7/1098	38/18046	0.00726523	0.042557	0.0319817	P2RY8/LPAR4/GPR18/GPR65/P2RY10/F2R/C3AR1	7
GO_POSITIVE_REGULATION_OF_EPITHELIAL_CELL_APOPTOTIC_PROCESS	GO_POSITIVE_REGULATION_OF_EPITHELIAL_CELL_APOPTOTIC_PROCESS	7/1098	38/18046	0.00726523	0.042557	0.0319817	SFRP4/CCL2/CD40LG/ITGA4/CD248/JAK2/IL6	7
GO_T_CELL_HOMEOSTASIS	GO_T_CELL_HOMEOSTASIS	7/1098	38/18046	0.00726523	0.042557	0.0319817	BCL2/NCKAP1L/CORO1A/SIT1/LMO1/P2RX7/JAK3	7
GO_NEGATIVE_REGULATION_OF_PROTEOLYSIS	GO_NEGATIVE_REGULATION_OF_PROTEOLYSIS	34/1098	360/18046	0.00735974	0.043058	0.0323582	MAP1A/SERPINA9/A2M/TIMP2/SFRP2/C4A/PRNP/CD27/NGFR/C4B/SPOCK1/CR1/COL6A3/CRIM1/TIMP1/SERPINA6/IFI16/SPOCK2/AQP1/CD44/LXN/SERPINE2/C3/TFPI2/PI15/CST6/CRB2/CST4/CD109/AGT/CST2/CST5/CST7/BIRC7	34
GO_METENCEPHALON_DEVELOPMENT	GO_METENCEPHALON_DEVELOPMENT	14/1098	111/18046	0.00740304	0.043058	0.0323582	BCL2/FCGR2B/CNTN1/SEZ6L/AIF1/GLI2/AGTR2/SERPINE2/CEND1/MYH10/CD3E/NLGN4X/MYO16/SEZ6	14
GO_PHOSPHATIDYLINOSITOL_BISPHOSPHATE_BINDING	GO_PHOSPHATIDYLINOSITOL_BISPHOSPHATE_BINDING	14/1098	111/18046	0.00740304	0.043058	0.0323582	PLEKHA2/MYO1G/ADAP2/NCF1B/SH3PXD2B/SNX20/NCF1C/MAPT/NCF1/CLVS2/PLEK/RPH3A/GSDMC/PHLDA3	14
GO_ATRIAL_SEPTUM_DEVELOPMENT	GO_ATRIAL_SEPTUM_DEVELOPMENT	5/1098	21/18046	0.0074172	0.043058	0.0323582	GJA5/NKX2-5/NOTCH2/TGFB2/DAND5	5
GO_CELLULAR_RESPONSE_TO_INTERFERON_BETA	GO_CELLULAR_RESPONSE_TO_INTERFERON_BETA	5/1098	21/18046	0.0074172	0.043058	0.0323582	PYHIN1/IFI16/TRIM6/MNDA/AIM2	5
GO_EOSINOPHIL_CHEMOTAXIS	GO_EOSINOPHIL_CHEMOTAXIS	5/1098	21/18046	0.0074172	0.043058	0.0323582	CCL2/CCL13/CCL5/SCG2/XCL2	5
GO_SENSORY_PERCEPTION_OF_TEMPERATURE_STIMULUS	GO_SENSORY_PERCEPTION_OF_TEMPERATURE_STIMULUS	5/1098	21/18046	0.0074172	0.043058	0.0323582	HTR2A/CXCR4/LXN/ADORA1/KCNK4	5
GO_SYMPATHETIC_NERVOUS_SYSTEM_DEVELOPMENT	GO_SYMPATHETIC_NERVOUS_SYSTEM_DEVELOPMENT	5/1098	21/18046	0.0074172	0.043058	0.0323582	PLXNA4/NRP2/GATA3/NRP1/SEMA3A	5
GO_NEURON_PROJECTION_GUIDANCE	GO_NEURON_PROJECTION_GUIDANCE	28/1098	282/18046	0.00743447	0.0431099	0.0323972	GLI3/FLRT2/PLXNA4/EPHA3/NRP2/NRXN3/RNF165/DOK5/DOK6/PIK3CD/TNR/ROBO1/GLI2/RAC2/GATA3/CXCR4/PLXNC1/RELN/NRP1/NTN3/DOK2/SEMA6B/SEMA3C/CHN1/SEMA7A/MYH10/MATN2/SEMA3A	28
GO_ACTIVATION_OF_PROTEIN_KINASE_ACTIVITY	GO_ACTIVATION_OF_PROTEIN_KINASE_ACTIVITY	32/1098	334/18046	0.00745549	0.0431836	0.0324526	IGF1/MDFIC/FGF1/CHRNA3/TLR6/MAP4K1/ITGA1/CCL19/NCKAP1L/GREM1/PRNP/PTPRC/NRK/ITGB3/F2R/P2RX7/C5AR1/CXCR4/CD40LG/TLR4/IL12B/TGFB2/CCDC88A/ADORA1/AGT/JAK2/FPR1/CCL5/SOCS1/CD74/BIRC7/NRG3	32
GO_GOLGI_LUMEN	GO_GOLGI_LUMEN	13/1098	100/18046	0.0075298	0.0435653	0.0327394	OGN/KERA/LUM/OMD/GPC6/SOD3/BGN/SDC3/MMP16/VCAN/TGFB1/MUC16/GPC5	13
GO_POSITIVE_REGULATION_OF_PATHWAY_RESTRICTED_SMAD_PROTEIN_PHOSPHORYLATION	GO_POSITIVE_REGULATION_OF_PATHWAY_RESTRICTED_SMAD_PROTEIN_PHOSPHORYLATION	8/1098	48/18046	0.00785999	0.0453239	0.034061	BMP3/ENG/DAB2/TGFB1/LEFTY2/TGFB2/GDF5/GDF3	8
GO_PRESYNAPSE_ORGANIZATION	GO_PRESYNAPSE_ORGANIZATION	8/1098	48/18046	0.00785999	0.0453239	0.034061	GPC6/C5AR1/NTNG2/LRRTM3/FZD1/PCDH17/IL1RAPL1/NLGN4X	8
GO_REGULATION_OF_BONE_REMODELING	GO_REGULATION_OF_BONE_REMODELING	8/1098	48/18046	0.00785999	0.0453239	0.034061	GREM1/TMEM119/ITGB3/P2RX7/INPP5D/SPP1/CD38/IL6	8
GO_INTERLEUKIN_6_SECRETION	GO_INTERLEUKIN_6_SECRETION	9/1098	58/18046	0.00796357	0.0458193	0.0344333	SYT11/CD200/BANK1/F2R/AIF1/TLR4/CD200R1/TWIST1/TLR8	9
GO_POSITIVE_REGULATION_OF_CHEMOKINE_PRODUCTION	GO_POSITIVE_REGULATION_OF_CHEMOKINE_PRODUCTION	9/1098	58/18046	0.00796357	0.0458193	0.0344333	TLR7/TLR9/AIF1/TLR4/HAVCR2/POSTN/TWIST1/CD74/IL6	9
GO_BLOOD_MICROPARTICLE	GO_BLOOD_MICROPARTICLE	17/1098	147/18046	0.00808916	0.0464902	0.0349375	BCHE/ACTG2/MSN/A2M/C4A/C4B/ENG/TGFB1/FN1/C3/HP/C1QC/APOE/C1QB/AGT/IGHG4/IGKV4-1	17
GO_POTASSIUM_ION_TRANSMEMBRANE_TRANSPORTER_ACTIVITY	GO_POTASSIUM_ION_TRANSMEMBRANE_TRANSPORTER_ACTIVITY	18/1098	159/18046	0.00813228	0.0466863	0.0350849	KCNN3/KCNMA1/ABCC9/KCNIP1/KCNA1/KCNK12/FXYD2/SLC24A3/AQP1/LRRC55/KCNA3/KCND2/GRIK1/KCND3/KCNK13/KCNC2/KCNK4/KCNA6	18
GO_POSITIVE_REGULATION_OF_REACTIVE_OXYGEN_SPECIES_METABOLIC_PROCESS	GO_POSITIVE_REGULATION_OF_REACTIVE_OXYGEN_SPECIES_METABOLIC_PROCESS	13/1098	101/18046	0.00817496	0.0468276	0.0351911	TLR6/AIF1/AGTR2/PDGFRB/TGFB1/TYROBP/MAPT/TLR4/ITGB2/NOX4/AGT/JAK2/ITGAM	13
GO_REGULATION_OF_CALCIUM_ION_TRANSPORT_INTO_CYTOSOL	GO_REGULATION_OF_CALCIUM_ION_TRANSPORT_INTO_CYTOSOL	13/1098	101/18046	0.00817496	0.0468276	0.0351911	SLC8A1/BCL2/AKAP6/CD19/CORO1A/CLIC2/THY1/PRNP/NOS1/F2R/P2RX7/CD4/APLNR	13
GO_CALCIUM_ION_IMPORT_INTO_CYTOSOL	GO_CALCIUM_ION_IMPORT_INTO_CYTOSOL	4/1098	14/18046	0.00834195	0.0473655	0.0355953	ATP2B4/MS4A1/CACNA2D1/PRNP	4
GO_COLLAGEN_ACTIVATED_SIGNALING_PATHWAY	GO_COLLAGEN_ACTIVATED_SIGNALING_PATHWAY	4/1098	14/18046	0.00834195	0.0473655	0.0355953	COL1A1/COL4A2/ITGA11/OSCAR	4
GO_NEGATIVE_REGULATION_OF_CATECHOLAMINE_SECRETION	GO_NEGATIVE_REGULATION_OF_CATECHOLAMINE_SECRETION	4/1098	14/18046	0.00834195	0.0473655	0.0355953	SYT11/P2RY12/SYT4/AGTR2	4
GO_POSITIVE_REGULATION_OF_METANEPHROS_DEVELOPMENT	GO_POSITIVE_REGULATION_OF_METANEPHROS_DEVELOPMENT	4/1098	14/18046	0.00834195	0.0473655	0.0355953	BASP1/AGTR2/PDGFRB/WT1	4
GO_POSITIVE_REGULATION_OF_T_CELL_APOPTOTIC_PROCESS	GO_POSITIVE_REGULATION_OF_T_CELL_APOPTOTIC_PROCESS	4/1098	14/18046	0.00834195	0.0473655	0.0355953	CD274/CCL5/PDCD1/IDO1	4
GO_POSITIVE_REGULATION_OF_T_CELL_RECEPTOR_SIGNALING_PATHWAY	GO_POSITIVE_REGULATION_OF_T_CELL_RECEPTOR_SIGNALING_PATHWAY	4/1098	14/18046	0.00834195	0.0473655	0.0355953	TESPA1/CCR7/TRAT1/LCK	4
GO_REGULATION_OF_RESPONSE_TO_TUMOR_CELL	GO_REGULATION_OF_RESPONSE_TO_TUMOR_CELL	4/1098	14/18046	0.00834195	0.0473655	0.0355953	IL12B/HAVCR2/CRTAM/CD274	4
GO_T_HELPER_2_CELL_CYTOKINE_PRODUCTION	GO_T_HELPER_2_CELL_CYTOKINE_PRODUCTION	4/1098	14/18046	0.00834195	0.0473655	0.0355953	IL31RA/GATA3/NLRP3/IL6	4
GO_REGULATION_OF_REACTIVE_OXYGEN_SPECIES_METABOLIC_PROCESS	GO_REGULATION_OF_REACTIVE_OXYGEN_SPECIES_METABOLIC_PROCESS	21/1098	196/18046	0.00836935	0.0474691	0.0356731	ATP2B4/PTGIS/BCL2/TLR6/CX3CR1/ABCD2/AIF1/RAC2/AGTR2/PDGFRB/TGFB1/TYROBP/MAPT/TLR4/ITGB2/NOX4/HP/BST1/AGT/JAK2/ITGAM	21
GO_HEART_MORPHOGENESIS	GO_HEART_MORPHOGENESIS	26/1098	259/18046	0.00842328	0.0475485	0.0357328	MEF2C/FLRT2/PARVA/FAT4/HEG1/NRP2/SFRP2/GJA5/ROBO1/NKX2-5/HEYL/GATA3/NOTCH2/ENG/COL5A1/NRP1/TGFB1/MICAL2/FZD1/TGFB2/EOMES/ALDH1A2/SEMA3C/HTR2B/TWIST1/FOXC2	26
GO_DETECTION_OF_MECHANICAL_STIMULUS_INVOLVED_IN_SENSORY_PERCEPTION	GO_DETECTION_OF_MECHANICAL_STIMULUS_INVOLVED_IN_SENSORY_PERCEPTION	6/1098	30/18046	0.00842922	0.0475485	0.0357328	HTR2A/KCNA1/PIEZO2/CXCR4/SERPINE2/KCNK4	6
GO_MYELOID_LEUKOCYTE_CYTOKINE_PRODUCTION	GO_MYELOID_LEUKOCYTE_CYTOKINE_PRODUCTION	6/1098	30/18046	0.00842922	0.0475485	0.0357328	TGFB1/TLR4/LILRB1/TGFB2/SEMA7A/CD74	6
GO_POSITIVE_REGULATION_OF_FILOPODIUM_ASSEMBLY	GO_POSITIVE_REGULATION_OF_FILOPODIUM_ASSEMBLY	6/1098	30/18046	0.00842922	0.0475485	0.0357328	DPYSL3/CCR7/DOCK11/CCL21/NRP1/TENM2	6
GO_REGULATION_OF_INFLAMMATORY_RESPONSE_TO_ANTIGENIC_STIMULUS	GO_REGULATION_OF_INFLAMMATORY_RESPONSE_TO_ANTIGENIC_STIMULUS	6/1098	30/18046	0.00842922	0.0475485	0.0357328	FCGR2B/CD28/CCR7/LTA/C3/IL12B	6
GO_LEADING_EDGE_MEMBRANE	GO_LEADING_EDGE_MEMBRANE	19/1098	172/18046	0.00861276	0.0485231	0.0364653	SCIMP/THY1/TLN1/MYO1G/LCP1/SHISA8/ITGB3/AIF1/ANTXR1/DOCK8/EPB41L3/FAP/MAPT/CD44/PLEK/ADORA1/TIAM1/KCNC2/LAMP5	19
GO_SIGNAL_RELEASE	GO_SIGNAL_RELEASE	41/1098	458/18046	0.00862072	0.0485231	0.0364653	MEF2C/HTR2A/PRKCB/SYT11/NRXN2/CHRNA3/TACR2/NCS1/SYT4/TAC1/DGKI/RAB8B/SCG5/GATA3/P2RX7/AGTR2/CHRNB4/CHRNA6/STX11/GJA1/SLC22A2/CHAT/KMO/UCN3/ADORA1/RPH3A/AGT/JAK2/CCL5/TIAM1/KCNC2/SLC9B2/SYN1/SPP1/CD38/DOC2B/IL6/CYP19A1/ILDR2/GIP/GCG	41
GO_ANTIGEN_PROCESSING_AND_PRESENTATION_OF_PEPTIDE_OR_POLYSACCHARIDE_ANTIGEN_VIA_MHC_CLASS_II	GO_ANTIGEN_PROCESSING_AND_PRESENTATION_OF_PEPTIDE_OR_POLYSACCHARIDE_ANTIGEN_VIA_MHC_CLASS_II	13/1098	102/18046	0.00886285	0.0497779	0.0374082	FCGR2B/AP1S2/TREM2/CTSL/HLA-DQA2/HLA-DMB/HLA-DQB2/HLA-DPB1/HLA-DRA/HLA-DOA/CD74/HLA-DPA1/HLA-DQA1	13
GO_METALLOENDOPEPTIDASE_ACTIVITY	GO_METALLOENDOPEPTIDASE_ACTIVITY	13/1098	102/18046	0.00886285	0.0497779	0.0374082	ADAMTS16/ADAM19/MMP2/MMP16/FAP/PAPPA/MEP1B/ADAMTS2/PHEX/ADAM12/ADAMDEC1/KEL/MMP7	13
GO_POSITIVE_REGULATION_OF_PHOSPHOLIPASE_ACTIVITY	GO_POSITIVE_REGULATION_OF_PHOSPHOLIPASE_ACTIVITY	9/1098	59/18046	0.00890323	0.0498544	0.0374657	HTR2A/EDNRA/P2RY12/C5AR1/PDGFRB/HTR2B/AGT/CCL5/APOC2	9
GO_NEGATIVE_REGULATION_OF_LEUKOCYTE_MEDIATED_IMMUNITY	GO_NEGATIVE_REGULATION_OF_LEUKOCYTE_MEDIATED_IMMUNITY	8/1098	49/18046	0.00890532	0.0498544	0.0374657	FCGR2B/PTPRC/CR1/CD84/JAK3/LILRB1/HAVCR2/CD96	8
GO_NEURON_RECOGNITION	GO_NEURON_RECOGNITION	8/1098	49/18046	0.00890532	0.0498544	0.0374657	EPHA3/TNN/NCAM2/ROBO1/CXCR4/NRP1/NTM/SEMA3A	8

## Sheet: Path
ID	Description	GeneRatio	BgRatio	pvalue	p.adjust	qvalue	geneID	Count
SCHUETZ_BREAST_CANCER_DUCTAL_INVASIVE_UP	SCHUETZ_BREAST_CANCER_DUCTAL_INVASIVE_UP	149/1154	352/20738	2.23504e-93	8.28081e-90	6.09342e-90	SGCD/MEF2C/COL14A1/RASSF2/CALD1/ZEB1/OLFML1/DPYSL3/FSTL1/ECM2/MAP1B/PARVA/ASPN/EMP3/WIPF1/AXL/MSN/RGS4/LUM/WWTR1/LAMA4/LPXN/IGFBP7/HEG1/SSPN/PLCG2/FGL2/LGALS1/TCF4/SPON1/FBN1/TM6SF1/GREM1/BICC1/ANGPTL2/LAPTM5/TLR7/ENTPD1/ADAM19/CDH11/EDNRA/MRC2/CLEC2B/GIMAP4/AEBP1/RNASE6/THY1/EVI2A/COL3A1/MS4A6A/PRNP/THSD7A/FBLN2/PTPRC/EVI2B/LDLRAD4/GLIPR1/CD53/ITGBL1/SCG5/GPR65/CLEC11A/MAFB/CTSK/COL15A1/SRPX2/IS…	149
SMID_BREAST_CANCER_NORMAL_LIKE_UP	SMID_BREAST_CANCER_NORMAL_LIKE_UP	134/1154	483/20738	2.30064e-57	4.26194e-54	3.13614e-54	CD79B/MEF2C/FCER1A/VPREB3/MYLK/IGF1/COL14A1/FLRT2/CNN1/CD22/ZEB1/LYL1/FAM49A/PRKCB/CD1C/LINC01140/MEOX2/LRMP/WIPF1/STAP1/CD37/ARHGAP15/CD52/MYH11/PTGDS/SYNM/NRXN2/CD19/MS4A1/MAP4K1/LAMA4/ARHGAP25/CD79A/CCL19/NCKAP1L/TESPA1/ELMO1/TCF4/CORO1A/CD72/CLIC2/LILRA4/GPR18/FCMR/SIT1/CLEC2B/FRZB/GIMAP4/PTPRCAP/RNASE6/FOLR2/GPR183/CD180/MS4A6A/CD27/PIK3CD/PTPRC/FMNL1/CD1E/EVI2B/GLIPR1/CD48/SELL/VCAM1/GVINP1…	134
POOLA_INVASIVE_BREAST_CANCER_UP	POOLA_INVASIVE_BREAST_CANCER_UP	100/1154	292/20738	3.74639e-52	4.62679e-49	3.40461e-49	CD79B/RASSF2/PRKCB/LRMP/PRUNE2/ARHGAP15/CD52/RGS4/CD19/MS4A1/MAP4K1/ARHGAP25/LPXN/CD79A/TNC/GREM1/FCMR/LAPTM5/LAT2/CDH11/GPR183/EVI2A/CD27/PTPRC/CHST11/CD1E/EVI2B/GLIPR1/CD53/GPR65/CD48/SELL/MAFB/VCAM1/GZMK/BANK1/COL6A3/TCL1A/EPYC/SP140/CCR7/LY96/LOXL1/AIF1/CXCL13/TRAC/CXCR4/COL5A1/SERPINA6/ITGA4/LST1/VCAN/FAP/CD6/CSF2RB/TRAT1/SRGN/THEMIS2/FN1/LTB/ITGB2/PLEK/SULF1/TRBC2/FPR3/BCAT1/LILRB1/TFEC/CD8…	100
LINDGREN_BLADDER_CANCER_CLUSTER_2B	LINDGREN_BLADDER_CANCER_CLUSTER_2B	110/1154	388/20738	4.60473e-48	4.26513e-45	3.13848e-45	CCDC80/MGP/MYLK/PPP1R12B/EBF1/MAP1A/CDC42EP3/FILIP1L/ECM2/ACTG2/PRICKLE1/EMP3/ARHGAP15/CD52/CPXM1/LIX1L/MSN/LUM/A2M/LAMA4/FCGR2B/IGFBP7/PCOLCE/FGL2/TNC/LGALS1/TCF4/NRP2/CLIC2/ANGPTL2/TIMP2/LAPTM5/LAT2/ENTPD1/ADAM19/EDNRA/AEBP1/GPC6/RNASE6/FOLR2/EVI2A/RHOH/C4A/PIK3CD/FBLN2/PPP1R18/LCP1/KLRG1/EVI2B/ARHGAP30/GLIPR1/EBI3/GJA5/SELL/MAFB/VCAM1/COL15A1/AP1S2/MS4A4A/PDGFRL/COL6A3/C1orf54/PECAM1/LRRC8C/SD…	110
VECCHI_GASTRIC_CANCER_ADVANCED_VS_EARLY_UP	VECCHI_GASTRIC_CANCER_ADVANCED_VS_EARLY_UP	74/1154	175/20738	2.57355e-46	1.907e-43	1.40326e-43	MGP/CALD1/FSTL1/PLXDC2/AXL/THBS4/GNB4/WWTR1/FRMD6/FBN1/RAB31/COL8A1/FBXO32/CDH11/EDNRA/PDE3A/GPC6/ZNF423/SFRP2/ISM1/CHST11/ITGBL1/MAFB/COL15A1/SFRP4/LTBP2/GXYLT2/BGN/SPOCK1/MSR1/PRRX1/SPARC/ANTXR1/CMTM3/LOX/NREP/MOXD1/COL1A2/PCED1B/DAB2/CYP7B1/VCAN/GPNMB/CRISPLD1/C3AR1/FAP/FNDC1/FN1/TRIM6/ARL4C/NOX4/SULF1/BCAT1/HAVCR2/COL5A2/CCDC88A/MYH10/GLIS2/THBS2/CST4/NTM/COL12A1/APOC1/TWIST1/TNFAIP6/TIAM1/CT…	74
RODWELL_AGING_KIDNEY_UP	RODWELL_AGING_KIDNEY_UP	121/1154	500/20738	6.8972e-45	4.25902e-42	3.13399e-42	COL14A1/TUBA1A/RFTN1/MILR1/FAM49A/GNG2/DOK3/PRICKLE1/EMP3/NAPSB/AXL/VIM/ARHGDIB/GNB4/LUM/CHRNA3/A2M/ARHGAP25/ITGA1/PIK3CG/TNC/CORO1A/SPON1/FBN1/NRXN3/RAB31/TIMP2/LAPTM5/MPEG1/MS4A7/CARD8-AS1/TSPAN18/CDH11/CX3CR1/AEBP1/RNASE6/VEGFC/ST8SIA4/EVI2A/COL3A1/C4A/MS4A6A/RAB33A/PIK3CD/PTPRC/PPP1R18/IKZF1/ACTN1/ARHGAP30/LDLRAD4/RAB8B/CD53/VCAM1/COL15A1/ISLR/GZMK/VASH1/MSR1/LOXL1/RAC2/DOCK11/ANTXR1/CMTM3/DK…	121
WALLACE_PROSTATE_CANCER_RACE_UP	WALLACE_PROSTATE_CANCER_RACE_UP	93/1154	302/20738	4.80718e-44	2.54437e-41	1.87227e-41	PDLIM3/CNN1/CD1C/SYT11/WIPF1/STAP1/CD37/ARHGAP15/CD52/PTGDS/MS4A1/MAP4K1/FCGR2B/ARHGAP25/CCL19/NCKAP1L/FGL2/CORO1A/FBN1/CLIC2/SELP/GPR18/FCMR/LAPTM5/EDNRA/RNASE6/GPR183/EVI2A/CPZ/CD27/PTPRC/CD1E/EVI2B/GLIPR1/CD53/GPR65/CD48/SELL/DOCK10/MS4A4A/GZMK/CD28/C1orf54/PECAM1/SYNDIG1/CCR7/LY96/CD207/RAC2/ALOX5AP/TRAC/C5AR1/CXCR4/AHNAK2/MYBL1/IFI16/ITGA4/PTPN7/ITGAL/CSF2RB/TRAT1/SRGN/THEMIS2/CCR5/ITGB2/ARL…	93
MCLACHLAN_DENTAL_CARIES_UP	MCLACHLAN_DENTAL_CARIES_UP	86/1154	265/20738	8.51879e-43	3.94527e-40	2.90311e-40	MGP/CD37/THBS4/ARHGDIB/MS4A1/FCGR2B/CD79A/FGL2/SASH3/CORO1A/RAB31/ANGPTL2/LAPTM5/CLEC2B/RNASE6/EVI2A/C4A/MS4A6A/CD27/PTPRC/LCP1/EVI2B/CD53/CD48/IGFBP4/VCAM1/ABCA1/COL15A1/SFRP4/MS4A4A/PECAM1/MSR1/LY96/CXCL13/PAX5/RAC2/ALOX5AP/C5AR1/CXCR4/CCL2/CD84/TIMP1/CD4/GPNMB/C3AR1/CSF2RB/TYROBP/SRGN/CD44/SERPINE2/LTB/ITGB2/PLEK/CYBB/CD93/C3/TRBC2/CD14/FCGR2A/HLA-DMB/SAMSN1/C1QA/CCR1/MRC1/APOE/MNDA/C1QB/CD209…	86
ANASTASSIOU_MULTICANCER_INVASIVENESS_SIGNATURE	ANASTASSIOU_MULTICANCER_INVASIVENESS_SIGNATURE	44/1154	64/20738	1.91972e-40	7.90287e-38	5.81531e-38	ASPN/GLT8D2/LUM/PCOLCE/LGALS1/FBN1/GREM1/RAB31/CDH11/EDNRA/AEBP1/THY1/COL3A1/ITGBL1/CTSK/SFRP4/BGN/SPOCK1/COL6A3/EPYC/MMP2/PRRX1/SPARC/LOX/OLFML2B/COL5A1/COL1A2/VCAN/FAP/PDGFRB/FN1/COL1A1/NOX4/SULF1/POSTN/RCN3/COL5A2/THBS2/NTM/TNFAIP6/SUGCT/ADAM12/COL10A1/LRRC15	44
BOQUEST_STEM_CELL_UP	BOQUEST_STEM_CELL_UP	72/1154	262/20738	9.94266e-31	3.68375e-28	2.71068e-28	PDLIM3/SGCD/MGP/IGF1/OGN/COL14A1/FLRT2/OLFML1/FGF7/LINC01140/ECM2/PTGIS/EMP3/AXL/GLT8D2/MYH11/PTGDS/LUM/OMD/ATP8B4/SSPN/PCOLCE/TNC/FBN1/BICC1/CDH11/FMO1/MRC2/AEBP1/COL3A1/BASP1/ITGBL1/DCX/MAFB/CTSK/SFRP4/ISLR/LTBP2/SPOCK1/PDGFRL/COL6A3/ROBO1/HTRA1/MMP2/PRRX1/MSC/NOTCH2/LOX/OLFML2B/TIMP1/COL5A1/COL1A2/VCAN/GPNMB/FAP/MXRA8/CD44/SERPINE2/COL1A1/C3/TGFB2/RCN3/COL5A2/SEMA3C/THBS2/APOE/KCND2/TWIST1/TNF…	72
TURASHVILI_BREAST_LOBULAR_CARCINOMA_VS_DUCTAL_NORMAL_UP	TURASHVILI_BREAST_LOBULAR_CARCINOMA_VS_DUCTAL_NORMAL_UP	38/1154	68/20738	4.1982e-30	1.41403e-27	1.04051e-27	IGF1/ZEB1/ASPN/WIPF1/FBN1/COL8A1/EDNRA/AEBP1/THY1/SFRP2/COL3A1/TAGAP/BGN/COL6A3/PRRX1/SPARC/C5AR1/LOX/CXCR4/PLXNC1/GPX8/COL5A1/COL1A2/VCAN/MICAL2/FNDC1/FN1/COL1A1/RGS1/SULF1/POSTN/COL5A2/THBS2/ENPEP/COL12A1/CTHRC1/ADAM12/LRRC15	38
PICCALUGA_ANGIOIMMUNOBLASTIC_LYMPHOMA_UP	PICCALUGA_ANGIOIMMUNOBLASTIC_LYMPHOMA_UP	63/1154	210/20738	2.14327e-29	6.61734e-27	4.86935e-27	CCDC80/MYLK/CALD1/FLRT2/KCNMA1/DPYSL3/FSTL1/PARVA/PTGDS/LUM/WWTR1/A2M/LAMA4/IGFBP7/CCL19/PCOLCE/TNC/FBN1/CDH11/THY1/COL3A1/GJC1/C4A/S1PR3/PLA2G4C/VCAM1/COL15A1/KCTD12/PRRX1/SPARC/LOXL1/RGL1/ANTXR1/CCL2/ENG/CCL21/COL1A2/DAB2/GPNMB/TLR4/FN1/COL1A1/CMKLR1/CDH5/CETP/COL4A2/CD93/C3/RRAS/SULF1/GJA1/P2RY13/CTSL/C1QA/C1QC/APOE/PLA2G2D/C1QB/COL12A1/APOC1/CTHRC1/CAV2/ADAMDEC1	63
CHARAFE_BREAST_CANCER_LUMINAL_VS_MESENCHYMAL_DN	CHARAFE_BREAST_CANCER_LUMINAL_VS_MESENCHYMAL_DN	95/1154	465/20738	4.49664e-29	1.28154e-26	9.43021e-27	BCHE/BNC2/MYLK/CALD1/RFTN1/FLRT2/FLNC/ZEB1/GNG2/FSTL1/MAP1B/PARVA/MDFIC/EMP3/WIPF1/FAT4/AXL/VIM/MIR100HG/LIX1L/MSN/RGS4/WWTR1/KATNAL1/BAG2/ITGA1/IGFBP7/HEG1/FBN1/RAB31/BICC1/TIMP2/TBC1D1/CDH11/MRC2/PDE3A/PRNP/PIK3CD/PPP1R18/ACTN1/SGTB/BASP1/GLIPR1/RAB8B/MARVELD1/VCL/ETS1/DOCK10/AP1S2/LTBP2/MAP7D1/GXYLT2/ELK3/COL6A3/HTRA1/KCTD12/MMP2/FHOD3/SGCB/SPARC/LOXL1/ANTXR1/CMTM3/CRIM1/DKK3/ENG/AHNAK2/ANTXR2…	95
THUM_SYSTOLIC_HEART_FAILURE_UP	THUM_SYSTOLIC_HEART_FAILURE_UP	89/1154	429/20738	8.52563e-28	2.25625e-25	1.66025e-25	SLC8A1/ZEB1/CDC42EP3/PLXDC2/LINC01140/LRMP/ASPN/FGF1/CD52/ARHGDIB/RGS4/OMD/FCGR2B/PIK3CG/EPHA3/SELP/LAPTM5/MPEG1/TLR7/ENTPD1/FBXO32/GPR34/TSPAN18/CX3CR1/CLEC2B/FOLR2/MS4A6A/PRNP/PTPRC/LCP1/EVI2B/CD53/ITGBL1/VCAM1/LAIR1/SFRP4/SRPX2/MS4A4A/LTBP2/TNFAIP8L2/VGLL3/NFIA/SDC3/MSR1/SGCB/PRRX1/LY96/LOXL1/AIF1/RAC2/ALOX5AP/NOTCH2/TRAC/DKK3/CXCR4/ENG/GPX8/LST1/VCAN/C3AR1/TYROBP/TLR4/SRGN/LXN/SERPINE2/ITGB2/…	89
TURASHVILI_BREAST_LOBULAR_CARCINOMA_VS_LOBULAR_NORMAL_DN	TURASHVILI_BREAST_LOBULAR_CARCINOMA_VS_LOBULAR_NORMAL_DN	37/1154	74/20738	5.20719e-27	1.28618e-24	9.4643e-25	RFTN1/ASPN/WIPF1/THBS4/CAP2/FBN1/COL8A1/AEBP1/SFRP2/COL3A1/TMEM119/TAGAP/SFRP4/BGN/COL6A3/MMP2/PRRX1/C5AR1/LOX/CXCR4/COL5A1/COL1A2/VCAN/FNDC1/FN1/COL1A1/COL4A2/RGS1/POSTN/COL5A2/THBS2/COL12A1/CTHRC1/SPP1/ADAM12/COL10A1/LRRC15	37
REACTOME_IMMUNOREGULATORY_INTERACTIONS_BETWEEN_A_LYMPHOID_AND_A_NON_LYMPHOID_CELL	REACTOME_IMMUNOREGULATORY_INTERACTIONS_BETWEEN_A_LYMPHOID_AND_A_NON_LYMPHOID_CELL	57/1154	191/20738	1.41427e-26	3.27493e-24	2.40985e-24	CD22/CD1C/CD19/FCGR2B/LILRA4/SIGLEC10/CLEC2B/COL3A1/CD200/KLRG1/SELL/VCAM1/LAIR1/CD300LB/SLAMF6/TREML1/CD300C/CD40LG/COL1A2/HCST/LILRA1/ITGA4/ITGAL/TYROBP/SH2D1A/KLRB1/CD200R1/TREM2/NCR3/COL1A1/ITGB2/SIGLEC5/SIGLEC8/C3/CD3G/TRAV8-4/LILRB1/TRAV29DV5/CD3D/SIGLEC7/SIGLEC9/TRBV7-9/CD3E/CD96/FCGR3A/CRTAM/LILRB4/PILRA/TRBV12-3/KIR3DL2/TRAV19/FCGR1A/OSCAR/IGKV2D-30/LILRA6/KIR3DL1/IGKV4-1	57
LIM_MAMMARY_STEM_CELL_UP	LIM_MAMMARY_STEM_CELL_UP	91/1154	480/20738	2.16428e-25	4.71685e-23	3.47089e-23	MEF2C/MYLK/COL14A1/CALD1/FLRT2/FLNC/CNN1/KCNMA1/DPYSL3/ACTG2/PRICKLE1/RHOJ/WIPF1/AXL/VIM/MYH11/CPXM1/GNB4/SYNM/ARHGAP25/ITGA1/HEG1/PCOLCE/FGL2/MBNL1/LGALS1/TCF4/NRP2/EVC/ANGPTL2/RNF165/ADGRA2/AEBP1/ZNF423/THY1/GJC1/AMOTL1/PRNP/NGFR/ISM1/PPP1R18/IGFBP4/ETS1/DOCK10/ELK3/VGLL3/HTRA1/LRRC8C/MMP2/FHOD3/SGCB/PRRX1/ANTXR1/FBXO30/DKK3/COL5A1/RELN/NRP1/VCAN/STAC/CRISPLD1/PCDH18/MICAL2/GPR176/SRGN/PPP2R2B/…	91
WANG_SMARCE1_TARGETS_UP	WANG_SMARCE1_TARGETS_UP	69/1154	291/20738	2.52456e-25	5.1964e-23	3.82376e-23	PRG4/MGP/MYLK/CALD1/DPYSL3/GNG2/PLXDC2/MAP1B/PARVA/RHOJ/LPP/HMCN1/LUM/PCDH10/ZNF521/HEG1/COL8A1/TIMP2/FBXO32/CLEC2B/COL3A1/LINC00968/CD200/S1PR3/IGFBP4/MAFB/FKBP7/ABCA1/COL15A1/DIO2/SPOCK1/ITGB3/COL6A3/MMP2/PRRX1/F2R/GATA3/ANTXR1/COL5A1/DAB2/ADD2/VCAN/FAP/VAT1L/TGFB1/RTN1/FNDC1/DACT1/FN1/DPYD/COL1A1/PCDH7/FZD1/SULF1/BCAT1/RASGRF2/KLHDC7B/TGFB2/POSTN/TGFBI/TSHZ2/WT1/CD109/NPR3/COL12A1/NLGN4X/MKX/C…	69
NAKAYAMA_SOFT_TISSUE_TUMORS_PCA1_UP	NAKAYAMA_SOFT_TISSUE_TUMORS_PCA1_UP	37/1154	83/20738	9.55703e-25	1.86362e-22	1.37134e-22	ARHGAP15/CD52/LUM/FCGR2B/NCKAP1L/ITGBL1/SRPX2/MS4A4A/GZMK/BIN2/LY96/AIF1/TRAC/CCL2/TIMP1/GPNMB/FAP/CD44/C3/TRBC2/CCL13/SLC15A3/LILRB1/CD14/FCGR2A/C1QA/THBS2/MRC1/C1QB/FCGR3A/HLA-DRA/CCL5/TNFAIP6/ITGAM/FCGR1A/HLA-DPA1/HLA-DQA1	37
ONDER_CDH1_TARGETS_2_UP	ONDER_CDH1_TARGETS_2_UP	63/1154	256/20738	3.71422e-24	6.88059e-22	5.06307e-22	KCNMA1/ZEB1/DPYSL3/SYT11/MAP1B/WIPF1/FAT4/LTBP1/PRUNE2/SYNM/RGS4/PIP4K2A/IGFBP7/PCOLCE/FBN1/GREM1/COL8A1/BICC1/CDH11/THY1/COL3A1/ZFHX4/DGKI/ITGBL1/SCG5/IGFBP4/DOCK10/AP1S2/LTBP2/BGN/SPOCK1/PDGFRL/COL6A3/ARHGAP22/SDC3/MMP2/PRRX1/SPARC/RGL1/LOX/MYBL1/NREP/COL5A1/MOXD1/COL1A2/NRP1/DAB2/VCAN/SIX2/MICAL2/SRGN/FN1/COL1A1/TRBC2/ABLIM3/POSTN/COL5A2/CHN1/CHST2/TWIST1/TNFAIP6/ADAM12/ANPEP	63
NABA_CORE_MATRISOME	NABA_CORE_MATRISOME	65/1154	275/20738	7.7042e-24	1.35924e-21	1.00019e-21	PRG4/MGP/OGN/COL14A1/ECM2/ASPN/KERA/COL6A6/LTBP1/THBS4/HMCN1/LUM/OMD/LAMA4/IGFBP7/PCOLCE/FGL2/LGI2/TNC/SPON1/FBN1/COL8A1/AEBP1/TNN/COL3A1/FBLN2/TNR/IGFBP4/COL15A1/SRPX2/LTBP2/BGN/SPOCK1/COL6A3/EPYC/SPARC/CRIM1/COL5A1/COL1A2/RELN/NTNG2/VCAN/CRISPLD1/SPOCK2/FNDC1/SRGN/FN1/COL1A1/COL4A2/NTN3/PXDN/POSTN/COL5A2/THBS2/TGFBI/COL12A1/TNFAIP6/CTHRC1/SPP1/NELL1/CILP2/PODNL1/MATN2/NDNF/COL10A1	65
HOSHIDA_LIVER_CANCER_SUBCLASS_S1	HOSHIDA_LIVER_CANCER_SUBCLASS_S1	57/1154	235/20738	1.22209e-21	2.0581e-19	1.51445e-19	MGP/FLNA/MAP1B/CD37/ARHGDIB/MSN/LUM/FGL2/LGALS1/TCF4/CORO1A/FBN1/RAB31/TIMP2/LAPTM5/CDH11/AEBP1/RNASE6/THY1/COL3A1/PTPRC/LCP1/GLIPR1/CD53/CD48/COL15A1/LTBP2/LHFPL2/CCR7/AIF1/ALOX5AP/LOX/CXCR4/COL1A2/IFI16/SLC2A5/DAB2/VCAN/GPNMB/C3AR1/AQP1/SRGN/ITGB2/CYBB/COL4A2/HLA-DQA2/CD3D/FCGR2A/POSTN/COL5A2/CHN1/C1QB/HLA-DPB1/HLA-DOA/CCL5/CD74/CCND2	57
REACTOME_EXTRACELLULAR_MATRIX_ORGANIZATION	REACTOME_EXTRACELLULAR_MATRIX_ORGANIZATION	65/1154	301/20738	1.46505e-21	2.36001e-19	1.73661e-19	COL14A1/ASPN/COL6A6/LTBP1/ADAMTS16/LUM/A2M/LAMA4/ITGA1/PCOLCE/TNC/FBN1/ELANE/COL8A1/TIMP2/ADAM19/TNN/COL3A1/FBLN2/ACTN1/TNR/VCAM1/CTSK/COL15A1/LTBP2/BGN/ITGB3/COL6A3/HTRA1/PECAM1/SDC3/MMP2/SPARC/LOXL1/ITGAD/LOX/TIMP1/MMP16/COL5A1/COL1A2/ITGA4/P4HA3/VCAN/ITGAL/TGFB1/CD44/FN1/COL1A1/ITGB2/COL4A2/PXDN/CTSL/TGFB2/COL5A2/COL12A1/GDF5/ITGA11/SPP1/ADAMTS2/ITGAM/ADAM12/CAPN6/CTRB1/COL10A1/MMP7	65
FLECHNER_BIOPSY_KIDNEY_TRANSPLANT_REJECTED_VS_OK_UP	FLECHNER_BIOPSY_KIDNEY_TRANSPLANT_REJECTED_VS_OK_UP	35/1154	88/20738	1.80819e-21	2.7914e-19	2.05405e-19	RASSF2/LY86/PRKCB/CD52/CORO1A/RAB31/LAPTM5/ENTPD1/RHOH/CD27/PTPRC/LCP1/GLIPR1/CD53/CD48/COL6A3/AIF1/RAC2/CXCR4/MOXD1/LST1/TYROBP/ITGB2/AOAH/CD14/CD3D/CD2/INPP5D/C1QB/LCK/FCGR3A/CCL5/APOC1/LILRB4/FCGR1A	35
SABATES_COLORECTAL_ADENOMA_DN	SABATES_COLORECTAL_ADENOMA_DN	64/1154	299/20738	4.94415e-21	7.32724e-19	5.39173e-19	BCHE/CCDC80/VPREB3/MYLK/IGF1/OGN/COL14A1/FCRLA/FLRT2/CNN1/PRKCB/MEOX2/ASPN/TNFRSF13C/STAP1/CD37/ARHGAP15/MYH11/MIR100HG/MS4A1/FCRL3/CCL19/TMEM255A/EPHA3/FCMR/SIT1/TLR7/PDE3A/GPC6/CD48/DOCK10/BMP3/KCTD12/CR2/CXCL13/EPB41L3/CCL21/LRRN2/ITGA4/GPNMB/FDCSP/RTN1/NCF1/FN1/PCDH7/LYPD8/CCL13/SV2B/PCDH19/PI15/SPIB/BRINP3/MEP1B/FEV/CCL5/NLGN4X/SCG2/ADAMDEC1/UGT2B17/ANPEP/PYY/TEX11/GCG/GBA3	64
FARMER_BREAST_CANCER_CLUSTER_4	FARMER_BREAST_CANCER_CLUSTER_4	17/1154	19/20738	6.46637e-20	9.21458e-18	6.78053e-18	FILIP1L/PCOLCE/FBN1/CDH11/AEBP1/COL3A1/CTSK/SRPX2/HTRA1/SPARC/COL5A1/COL1A2/FAP/DACT1/COL5A2/THBS2/ADAM12	17
QI_PLASMACYTOMA_UP	QI_PLASMACYTOMA_UP	57/1154	254/20738	6.75428e-20	9.26838e-18	6.82011e-18	IGF1/RASSF2/LY86/CD22/CDC42EP3/ACTG2/BCL2/STAP1/CD37/AXL/ARHGDIB/GNB4/CD19/CNR2/BAG2/CD79A/CCL19/FGL2/TLR9/VAV1/TLN1/LCP1/GPSM3/ABI3/CD53/TLR1/ITGB3/SWAP70/RGL1/RAC2/ALOX5AP/PLXNC1/LST1/CD4/TNFSF13B/IL21R/TGFB1/SH2D1A/TRAT1/CCR5/LTB/ITGB2/PLEK/FAS/RGS1/CD3G/CD3D/SPIB/CCR1/CD3E/NFAM1/CIITA/LCK/CCL5/SOCS1/CST7/MYCN	57
VERHAAK_GLIOBLASTOMA_MESENCHYMAL	VERHAAK_GLIOBLASTOMA_MESENCHYMAL	52/1154	216/20738	1.07096e-19	1.41711e-17	1.04278e-17	BNC2/DOK3/EMP3/WIPF1/LTBP1/WWTR1/FCGR2B/LGALS1/LAPTM5/MRC2/CLEC2B/FOLR2/EHD2/PTPRC/FMNL1/LCP1/MAFB/LAIR1/SRPX2/MS4A4A/LTBP2/SWAP70/LHFPL2/C1orf54/MSR1/LY96/RAC2/C5AR1/LOX/ENG/TIMP1/COL5A1/COL1A2/NRP1/ITGA4/DAB2/CD4/MYO1F/TLR4/THEMIS2/CCR5/COL1A1/ITGB2/RRAS/FPR3/CD14/FCGR2A/SIGLEC7/SIGLEC9/TGFBI/ITGAM/ADAM12	52
HOLLERN_EMT_BREAST_TUMOR_UP	HOLLERN_EMT_BREAST_TUMOR_UP	41/1154	138/20738	2.12445e-19	2.71416e-17	1.99721e-17	FLNC/ZEB1/EMP3/AXL/VIM/GNB4/CYSLTR1/WAS/FCGR2B/PCOLCE/CSGALNACT2/NRP2/ANGPTL2/TIMP2/GPR34/MRC2/ADGRA2/VEGFC/ST8SIA4/FOLR2/NRROS/GLIPR1/MARVELD1/IGFBP4/FKBP7/AP1S2/PRRX1/LOXL1/RGS18/SNX20/NFATC1/SPI1/DAB2/HTRA3/MXRA8/FN1/GPR85/SEMA7A/MRC1/SACS/MATN2	41
RIGGI_EWING_SARCOMA_PROGENITOR_DN	RIGGI_EWING_SARCOMA_PROGENITOR_DN	48/1154	194/20738	8.28017e-19	1.0226e-16	7.52479e-17	PRG4/BNC2/COL14A1/EBF1/DPYSL3/GNG2/FGF7/ECM2/PTGIS/GLT8D2/MIR100HG/LUM/SCRG1/LAMA4/LPXN/ZNF521/MAB21L2/HEG1/BEND6/SPON1/NRP2/BICC1/GPC6/LINC00968/SFRP4/GXYLT2/FHOD3/PRRX1/PIEZO2/ALDH1A3/MMP16/NREP/MOXD1/NRP1/SLC2A5/TSHZ1/VCAN/PDE4B/CD44/DPYD/LXN/FAM83D/KCTD4/GDF5/HLA-DPA1/ADAM12/CHI3L2/COL10A1	48
LEE_DIFFERENTIATING_T_LYMPHOCYTE	LEE_DIFFERENTIATING_T_LYMPHOCYTE	48/1154	199/20738	2.55467e-18	3.00564e-16	2.21169e-16	P2RY8/PRKCB/ARHGAP15/CD52/ARHGDIB/MAP4K1/ARHGAP25/LPXN/PIK3CG/NCKAP1L/SASH3/CORO1A/LAPTM5/VAV1/EVI2A/RHOH/PTPRC/LINC01215/IKZF1/EVI2B/ARHGAP30/CD53/CD48/SELL/NLRC3/TAGAP/AIF1/RAC2/GATA3/SNX20/CXCR4/DOCK8/ITGAL/SH2D1A/TRAT1/LTB/ITGB2/CAMK1D/TRBC2/CD3G/SELPLG/CD3D/UBASH3A/CD2/LAX1/CD96/LCK/RASGRP1	48
RODWELL_AGING_KIDNEY_NO_BLOOD_UP	RODWELL_AGING_KIDNEY_NO_BLOOD_UP	51/1154	223/20738	2.59596e-18	3.00564e-16	2.21169e-16	COL14A1/RFTN1/PRICKLE1/AXL/LUM/CHRNA3/A2M/ITGA1/TNC/SPON1/FBN1/TIMP2/CDH11/AEBP1/VEGFC/COL3A1/C4A/LDLRAD4/VCAM1/COL15A1/ISLR/COL6A3/MSR1/LOXL1/ANTXR1/DKK3/CCL2/ANTXR2/TIMP1/GPX8/COL5A1/MOXD1/COL1A2/GPNMB/FN1/SERPINE2/COL1A1/RGS1/C3/PXDN/LIX1/NFIX/C1QA/C1QC/TRIL/MRC1/C1QB/KCND3/PHLDA3/CTHRC1/MMP7	51
REACTOME_PD_1_SIGNALING	REACTOME_PD_1_SIGNALING	19/1154	28/20738	5.40366e-18	6.06684e-16	4.46427e-16	CD4/CD3G/PDCD1LG2/TRAV8-4/HLA-DQA2/TRAV29DV5/CD3D/HLA-DQB2/TRBV7-9/CD3E/LCK/HLA-DPB1/CD274/HLA-DRA/PDCD1/TRBV12-3/TRAV19/HLA-DPA1/HLA-DQA1	19
REACTOME_GPCR_LIGAND_BINDING	REACTOME_GPCR_LIGAND_BINDING	76/1154	463/20738	1.38955e-17	1.5142e-15	1.11422e-15	HTR2A/GNG2/GNB4/CYSLTR1/CNR2/TACR2/LPAR4/CCL19/TACR1/GRPR/GPR18/PENK/CX3CR1/EDNRA/P2RY12/GPBAR1/GPR183/TAC1/SUCNR1/PTCH2/S1PR3/GPR65/GNG13/UTS2B/P2RY10/DHH/CCR7/GNGT2/F2R/CXCL13/MLNR/C5AR1/AGTR2/CXCR4/RAMP2/CCL2/WNT9B/CCL21/CCR4/PMCH/C3AR1/CCR5/CMKLR1/GPR132/FZD1/C3/DRD5/TAS1R3/FPR3/CCL13/P2RY13/CALCRL/APLNR/CYSLTR2/CCR1/HTR2B/CXCR5/UCN3/ADORA1/AGT/CCL22/FPR1/CCL5/CXCR3/CCL17/CCR9/XCL2/GPR31/GRM7…	76
JAATINEN_HEMATOPOIETIC_STEM_CELL_DN	JAATINEN_HEMATOPOIETIC_STEM_CELL_DN	51/1154	235/20738	2.77565e-17	2.93823e-15	2.16209e-15	CALD1/FGL2/GPR18/MPEG1/CX3CR1/GIMAP4/MS4A6A/CD27/GPR65/ETS1/GZMK/CD28/KCTD12/CCR7/RGS18/PYHIN1/ANKRD55/C5AR1/MYBL1/VCAN/IL21R/TYROBP/SAMD3/KLRB1/TRAT1/RTN1/ITGB2/ARL4C/CYBB/RGS1/STX11/RASGRF2/DOK2/CD86/CD14/CD3D/FCGR2A/CD2/IGSF6/THEMIS/CCR1/TGFBI/MNDA/LCK/RHD/FPR1/RASGRP1/CCL5/ITGAM/CST7/NKG7	51
DELYS_THYROID_CANCER_UP	DELYS_THYROID_CANCER_UP	73/1154	442/20738	4.39461e-17	4.52278e-15	3.32808e-15	DPYSL3/EMP3/FGF1/ARHGDIB/MAP4K1/NCKAP1L/TNC/LGALS1/NRP2/COL8A1/ENTPD1/CX3CR1/MRC2/RNASE6/COL3A1/C4A/MS4A6A/SCG5/SPOCK1/PDE5A/MSR1/ALOX5AP/ALDH1A3/AHNAK2/PLXNC1/TIMP1/LST1/VCAN/STAC/C3AR1/FAP/SPOCK2/SH2D1A/CD44/FN1/TREM2/DPYD/COL1A1/PCDH7/FAS/C3/RRAS/BCAT1/CCL13/PXDN/APLNR/FCGR2A/HP/COL5A2/CST6/IGSF6/C1QA/MYH10/CCR1/THBS2/MRC1/APOE/MNDA/C1QB/ADORA1/CHST2/APOC1/TNFAIP6/TIAM1/CCL17/SPP1/CCND2/ADAM12…	73
KIM_GLIS2_TARGETS_UP	KIM_GLIS2_TARGETS_UP	30/1154	85/20738	6.93928e-17	6.94865e-15	5.11315e-15	MGP/OGN/COL14A1/LUM/SPON1/FBN1/COL3A1/VCAM1/COL15A1/LTBP2/PDGFRL/SPARC/AIF1/CMTM3/CCL2/CCL21/COL1A2/TNFSF13B/LTB/COL1A1/C3/POSTN/HLA-DMB/TGFBI/HLA-DRA/CCL5/CD74/ADAMTS2/MATN2/HLA-DQA1	30
SWEET_LUNG_CANCER_KRAS_DN	SWEET_LUNG_CANCER_KRAS_DN	70/1154	417/20738	8.24826e-17	8.04206e-15	5.91773e-15	MGP/MEF2C/OGN/TUBA1A/ZEB1/LYL1/GNG2/FGF7/MEOX2/PTGIS/RHOJ/MYH11/GNB4/WWTR1/OMD/MS4A1/SSPN/FGL2/TCF4/ANGPTL2/CDH11/FMO1/GIMAP4/ST8SIA4/COL3A1/SOD3/VCL/ABCA1/ETS1/MS4A4A/MAP7D1/CNTN1/ROBO1/KCTD12/SPARC/LOXL1/ZBTB20/LOX/CXCR4/RAMP2/ENG/ANTXR2/CCL21/COL1A2/PDGFRB/PKIA/MAPT/SPOCK2/AQP1/SRGN/LTB/COL1A1/CDH5/FAS/CD93/C3/UPK3B/BCL6B/CALCRL/BNC1/POSTN/HP/SEMA3C/SEMA7A/SPIB/MNDA/NPR3/TIAM1/GBP4/SLC10A2	70
SERVITJA_ISLET_HNF1A_TARGETS_UP	SERVITJA_ISLET_HNF1A_TARGETS_UP	42/1154	169/20738	1.06236e-16	1.00924e-14	7.42646e-15	SERPINA9/VIM/ARHGDIB/MSN/ZNF521/PCOLCE/LGALS1/FBN1/TIMP2/LAPTM5/CDH11/AEBP1/THY1/COL3A1/ZFHX4/VCAM1/MS4A4A/BGN/HTRA1/CXCL13/NOTCH2/DKK3/CCL2/SERPINE2/ITGB2/SCARF2/SLC15A3/SV2B/TGFB2/POSTN/COL5A2/C1QC/THBS2/APOE/C1QB/KCND2/NTM/GBP4/EGR3/HLA-DQA1/GRM7/UCHL1	42
TONKS_TARGETS_OF_RUNX1_RUNX1T1_FUSION_HSC_DN	TONKS_TARGETS_OF_RUNX1_RUNX1T1_FUSION_HSC_DN	45/1154	193/20738	1.18142e-16	1.09429e-14	8.0523e-15	FCER1A/RASSF2/CD52/SASH3/LGALS1/TMEM156/LAPTM5/LAT2/GPR183/RHOH/EHD3/ACTN1/LDLRAD4/CD48/IGFBP4/MMP2/BIN2/CCR7/ALOX5AP/CXCR4/CCL2/PLXNC1/SPI1/LST1/ITGAL/CSF2RB/MICAL2/TYROBP/LTB/CYBB/TRBC2/DOK2/SELPLG/FCGR2A/DUSP10/TGFBI/IL9R/CEBPE/SOCS1/CST7/MYCN/EGR3/NKG7/ANPEP/CLC	45
SENESE_HDAC1_AND_HDAC2_TARGETS_DN	SENESE_HDAC1_AND_HDAC2_TARGETS_DN	50/1154	237/20738	1.95369e-16	1.76547e-14	1.29911e-14	CCDC80/BNC2/MYLK/CALD1/TUBA1A/EBF1/CDC42EP3/FSTL1/GLT8D2/FGF1/LUM/CAP2/KATNAL1/IGFBP7/PCOLCE/TMEM255A/TCF4/NRXN3/LAT2/SERTAD4-AS1/COL3A1/ITGBL1/GXYLT2/PDGFRL/LOXL1/GLI2/SESN3/LOX/EPB41L3/GPX8/MYBL1/STAC/GPNMB/KRT81/AQP1/DACT1/COL1A1/PPP2R2B/MN1/TGFB2/COL5A2/SFTA1P/TMEM200C/CCL26/CALB2/SPP1/MATN2/LINC01116/C5orf46/TENM2	50
HELLER_SILENCED_BY_METHYLATION_UP	HELLER_SILENCED_BY_METHYLATION_UP	55/1154	283/20738	2.76713e-16	2.441e-14	1.7962e-14	RASSF2/FAM49A/RGS13/LPXN/CCL19/FBN1/ADAM19/CDH11/CX3CR1/GPR183/PIK3CD/CRYBB1/CD1E/CD200/LCP1/EBI3/IGFBP4/MAFB/PLA2G4C/VCAM1/DOCK10/PECAM1/MSR1/CCR7/SPARC/CXCL13/GATA3/C5AR1/OLFML2B/RELN/GPNMB/CSF2RB/NCF1/ARL4C/PLEK/RGS1/APOBEC3G/HLA-DQA2/CD86/DAZL/HLA-DMB/SAMSN1/SPIB/APOE/CIITA/HLA-DPB1/HLA-DRA/APOC1/TNFAIP6/SOCS1/CST7/HLA-DPA1/ADAMDEC1/HLA-DQA1/PYY	55
REACTOME_CLASS_A_1_RHODOPSIN_LIKE_RECEPTORS	REACTOME_CLASS_A_1_RHODOPSIN_LIKE_RECEPTORS	60/1154	331/20738	3.6608e-16	3.15425e-14	2.32104e-14	HTR2A/CYSLTR1/CNR2/TACR2/LPAR4/CCL19/TACR1/GRPR/GPR18/PENK/CX3CR1/EDNRA/P2RY12/GPBAR1/GPR183/TAC1/SUCNR1/S1PR3/GPR65/UTS2B/P2RY10/CCR7/F2R/CXCL13/MLNR/C5AR1/AGTR2/CXCR4/CCL2/CCL21/CCR4/PMCH/C3AR1/CCR5/CMKLR1/GPR132/C3/DRD5/FPR3/CCL13/P2RY13/APLNR/CYSLTR2/CCR1/HTR2B/CXCR5/ADORA1/AGT/CCL22/FPR1/CCL5/CXCR3/CCL17/CCR9/XCL2/GPR31/NPBWR1/KEL/UTS2/PYY	60
TAKEDA_TARGETS_OF_NUP98_HOXA9_FUSION_8D_DN	TAKEDA_TARGETS_OF_NUP98_HOXA9_FUSION_8D_DN	45/1154	201/20738	6.0728e-16	5.11358e-14	3.76281e-14	KCNMA1/PLXDC2/BCL2/HVCN1/FCGR2B/TM6SF1/ENTPD1/GPR34/ADAM19/ST6GALNAC5/MSC-AS1/PRNP/CD1E/RAB30/P2RY10/ETS1/TSPAN2/GXYLT2/CR1/HTRA1/ANTXR1/C5AR1/NRP1/DAB2/STAC/GPNMB/TRAT1/CD200R1/CYBB/CAMK1D/FPR3/BPI/CD14/C1QA/C1QC/TGFBI/MRC1/C1QB/FPR1/CEBPE/ITGAM/CST7/HLA-DQA1/UTS2/ADGRE3	45
KEGG_CELL_ADHESION_MOLECULES_CAMS	KEGG_CELL_ADHESION_MOLECULES_CAMS	36/1154	133/20738	8.99686e-16	7.40742e-14	5.45073e-14	CD22/NRXN2/SELP/NRXN3/NCAM2/PTPRC/SELL/VCAM1/CNTN1/CD28/PECAM1/SDC3/SPN/CD40LG/ITGA4/CD4/VCAN/ITGAL/CD6/ITGB2/CDH5/PDCD1LG2/HLA-DQA2/CD86/SELPLG/CD2/HLA-DMB/HLA-DPB1/CD274/HLA-DRA/HLA-DOA/PDCD1/NLGN4X/ITGAM/HLA-DPA1/HLA-DQA1	36
MARKEY_RB1_ACUTE_LOF_DN	MARKEY_RB1_ACUTE_LOF_DN	48/1154	229/20738	1.02733e-15	8.27443e-14	6.08872e-14	OGN/CPXM2/LYL1/MEOX2/CD52/CPXM1/FCGR2B/NCKAP1L/CD72/MPEG1/LAT2/VAV1/EVI2A/PTPRC/LCP1/RAB8B/FKBP7/ABCA1/SGCB/PRRX1/RAC2/C5AR1/CD300C/LST1/C3AR1/TYROBP/SRGN/NCF1/ITGB2/SELPLG/ALDH1A2/HP/FERMT3/SEMA7A/C1QC/CCR1/TGFBI/SLFN12L/MNDA/C1QB/NPR3/FPR1/CCL5/CSF2RA/LILRB4/ITGAM/GBP4/FCGR1A	48
KEGG_HEMATOPOIETIC_CELL_LINEAGE	KEGG_HEMATOPOIETIC_CELL_LINEAGE	29/1154	87/20738	1.31913e-15	1.03987e-13	7.65186e-14	CD22/CD1C/CD37/CD19/MS4A1/ITGA1/FCER2/CD1E/ITGB3/CR1/CR2/ITGA4/CD4/CD44/CD3G/CD14/CD3D/GP1BA/CD2/CD3E/IL9R/HLA-DRA/CSF2RA/IL5/CD38/ITGAM/FCGR1A/IL6/ANPEP	29
SANSOM_APC_TARGETS_DN	SANSOM_APC_TARGETS_DN	60/1154	341/20738	1.52269e-15	1.17532e-13	8.64859e-14	RASSF2/DTX1/PLD4/CD22/LYL1/CD52/ARHGDIB/PCOLCE/CORO1A/CD72/LAPTM5/LAT2/ADAM19/GIMAP4/ST8SIA4/HIC1/VAV1/EVI2A/PIK3CD/PTPRC/FMNL1/BASP1/GPSM3/CD48/CD28/NFIA/CXCL13/RAC2/CCL21/SLC2A5/ITGAL/CD6/TGFB1/TYROBP/KLRB1/SRGN/NCF1/ITGB2/FAS/SELPLG/CD3D/CD2/HLA-DMB/SPIB/C1QC/INPP5D/MEP1B/TGFBI/IL12RB1/NPR3/JAK2/CHST2/CD70/CCL5/CCR9/CST7/GIP/PCDHA13/IDO1/GCG	60
CLASPER_LYMPHATIC_VESSELS_DURING_METASTASIS_DN	CLASPER_LYMPHATIC_VESSELS_DURING_METASTASIS_DN	19/1154	35/20738	2.18595e-15	1.65285e-13	1.21624e-13	LTBP1/PCOLCE/FBN1/CDH11/COL3A1/S1PR3/LTBP2/BGN/COL6A3/ROBO1/LOXL1/LOX/TIMP1/COL5A1/COL1A2/VCAN/COL5A2/SEMA3C/FOXC2	19
ICHIBA_GRAFT_VERSUS_HOST_DISEASE_35D_UP	ICHIBA_GRAFT_VERSUS_HOST_DISEASE_35D_UP	37/1154	144/20738	2.2401e-15	1.65991e-13	1.22144e-13	PLD4/CD52/TLR6/FGL2/LAPTM5/MPEG1/PTPRC/CD53/MARVELD1/VCAM1/MS4A4A/MSR1/AIF1/CCL2/TYROBP/ITGB2/CYBB/RRAS/SELPLG/CD14/HLA-DMB/C1QA/C1QC/CCR1/SLFN12L/MNDA/C1QB/LCK/GDF5/FPR1/CCL5/LILRB4/CD74/GBP4/FCGR1A/RNASE3/HLA-DQA1	37
MIYAGAWA_TARGETS_OF_EWSR1_ETS_FUSIONS_DN	MIYAGAWA_TARGETS_OF_EWSR1_ETS_FUSIONS_DN	48/1154	235/20738	2.97624e-15	2.16215e-13	1.59102e-13	CCDC80/SYNC/SLC8A1/RFTN1/CDC42EP3/FILIP1L/FGF7/ACTG2/LTBP1/GLT8D2/SYNM/LUM/MAB21L2/COL8A1/ADAM19/DOK5/COL3A1/LINC00968/ACTN1/SCG5/VGLL3/PRRX1/SPARC/ALDH1A3/CCL2/NREP/COL5A1/COL1A2/NRP1/DAB2/VCAN/GPNMB/PCDH18/PKIA/MICAL2/CD44/TRBC2/SEMA3C/CHN1/SEMA7A/KCTD4/ITGA11/MIR155HG/IL6/MATN2/ADAM12/TENM3/GPR1	48
BOQUEST_STEM_CELL_CULTURED_VS_FRESH_UP	BOQUEST_STEM_CELL_CULTURED_VS_FRESH_UP	68/1154	427/20738	3.52748e-15	2.47307e-13	1.8198e-13	PRG4/BCHE/MGP/SYNC/IGF1/COL14A1/PPP1R12B/FLNC/CDC42EP3/LINC01140/ECM2/PTGDS/ARHGDIB/SYNM/RGS4/OMD/SCRG1/A2M/ATP8B4/SSPN/FGL2/EPHA3/GREM1/CLIC2/ANGPTL2/FMO1/CLEC2B/FRZB/AEBP1/DOK5/GLIPR1/SCG5/DCX/MAFB/VCAM1/CTSK/COL15A1/SRPX2/ZBTB20/LOX/CCL2/ENG/MYBL1/MOXD1/ITGA4/GPNMB/MICAL2/SRGN/CD44/FN1/SERPINE2/NOX4/CD83/SULF1/TGFB2/PAPPA/APOE/NPR3/ENPEP/APOC1/TNFAIP6/HLA-DPA1/MATN2/ADAM12/CAPN6/TENM3/DKK2/UCH…	68
WIELAND_UP_BY_HBV_INFECTION	WIELAND_UP_BY_HBV_INFECTION	31/1154	103/20738	3.53773e-15	2.47307e-13	1.8198e-13	ARHGDIB/LPXN/FGL2/RAB31/LAPTM5/PIK3CD/CD53/CD48/GZMK/C1orf54/RGL1/RAC2/CXCR4/IFI16/GPNMB/C3AR1/TYROBP/SRGN/THEMIS2/CD83/CD3D/HLA-DMB/IGSF6/C1QB/HLA-DPB1/HLA-DRA/CCL5/CD38/CD74/FCGR1A/HLA-DPA1	31
CHIANG_LIVER_CANCER_SUBCLASS_CTNNB1_DN	CHIANG_LIVER_CANCER_SUBCLASS_CTNNB1_DN	40/1154	170/20738	4.24793e-15	2.91455e-13	2.14467e-13	PRG4/CCDC80/ASPN/CD52/PTGDS/LUM/GPR88/CCL19/TIMP2/AEBP1/GPR183/EVI2A/COL3A1/CHST11/BASP1/ISLR/BGN/COL6A3/KCTD12/LOXL1/CMTM3/TIMP1/CCL21/COL5A1/MOXD1/COL1A2/VCAN/TNFSF13B/GPNMB/KLRB1/LXN/SERPINE2/COL1A1/RGS1/SULF1/CD2/THBS2/RASGRP1/CTHRC1/AIM2	40
RUTELLA_RESPONSE_TO_CSF2RB_AND_IL4_DN	RUTELLA_RESPONSE_TO_CSF2RB_AND_IL4_DN	57/1154	320/20738	4.51347e-15	3.04044e-13	2.2373e-13	MEF2C/LY86/PRKCB/LRMP/CD52/ZNF804A/PTGDS/MAP4K1/LPXN/IGFBP7/TM6SF1/TIMP2/ENTPD1/TBC1D1/CX3CR1/MS4A6A/CD48/SELL/MAFB/TLR1/CTSK/LAIR1/MS4A4A/SPOCK1/PECAM1/SPARC/AIF1/NOTCH2/C5AR1/CCL2/EPB41L3/NREP/ITGA4/DAB2/VCAN/ITGAL/C3AR1/CCR5/CMKLR1/CYBB/AOAH/C3/BCAT1/CTSL/CD14/HDAC9/C1QA/CCR1/CRTAM/CHST15/FPR1/NLRP3/LILRB4/FCGR1A/HLA-DQA1/NKG7/IDO1	57
RUTELLA_RESPONSE_TO_HGF_VS_CSF2RB_AND_IL4_UP	RUTELLA_RESPONSE_TO_HGF_VS_CSF2RB_AND_IL4_UP	66/1154	412/20738	6.77047e-15	4.47939e-13	3.29615e-13	MEF2C/LY86/KCNMA1/PRKCB/LRMP/CD52/ZNF804A/PTGDS/LPXN/IGFBP7/TM6SF1/TIMP2/ENTPD1/TBC1D1/CX3CR1/CD48/SELL/MAFB/TLR1/CTSK/LAIR1/MS4A4A/LTBP2/LHFPL2/PECAM1/MMP2/SPARC/RGL1/AIF1/NOTCH2/C5AR1/CRIM1/CCL2/EPB41L3/NRP1/DAB2/ITGAL/GPNMB/C3AR1/LXN/CCR5/CMKLR1/CYBB/AOAH/C3/BCAT1/CTSL/CD14/KMO/HDAC9/C1QA/CCR1/APOE/CRTAM/CHST15/FPR1/NLRP3/APOC1/LILRB4/TNFAIP6/SPP1/FCGR1A/ADAMDEC1/HLA-DQA1/NKG7/IDO1	66
LIU_PROSTATE_CANCER_DN	LIU_PROSTATE_CANCER_DN	72/1154	491/20738	4.11071e-14	2.62908e-12	1.93461e-12	MYLK/COL14A1/NHSL2/CALD1/FLNA/PPP1R12B/TUBA1A/FLNC/KCNMA1/LSAMP/DPYSL3/CDC42EP3/ATP2B4/MAP1B/ACTG2/RHOJ/BCL2/LTBP1/MYH11/PTGDS/MIR100HG/SH3BGRL/SCRG1/LAMA4/ITGA1/FRMD6/SSPN/PPP1R12A/LGALS1/SPON1/FBN1/ANGPTL2/PENK/TIMP2/TBC1D1/TSPAN18/MRC2/ADGRA2/AEBP1/GPC6/EHD2/GJC1/PLEKHA2/SLMAP/MARVELD1/VCL/SH3PXD2B/ROBO1/FHOD3/SLC24A3/PRRX1/SPARC/GATA3/CRIM1/DKK3/AHNAK2/EPB41L3/COL5A1/COL1A2/CD248/PCDH7/CYS1/C…	72
GAURNIER_PSMD4_TARGETS	GAURNIER_PSMD4_TARGETS	25/1154	72/20738	4.11571e-14	2.62908e-12	1.93461e-12	CCL19/CCR7/CXCL13/C5AR1/CCL2/IL21R/C3AR1/TGFB1/CCR5/C3/CCL13/IL12B/CD86/HLA-DPB2/HLA-DMB/HLA-DQB2/CCR1/IL12RB1/HLA-DPB1/HLA-DRA/HLA-DOA/CCL5/IL6/HLA-DPA1/HLA-DQA1	25
SCHAEFFER_PROSTATE_DEVELOPMENT_48HR_DN	SCHAEFFER_PROSTATE_DEVELOPMENT_48HR_DN	64/1154	408/20738	4.79689e-14	3.01228e-12	2.21658e-12	CCDC80/IGF1/RASSF2/CPXM2/PABPC4L/ZEB1/CDC42EP3/FILIP1L/FAM49A/PRKCB/RHOJ/PCDH10/ABCC9/ARHGAP25/ZNF521/TCF4/GREM1/NRP2/COL8A1/MS4A7/TSPAN18/EDNRA/NRROS/IGFBP4/TSPAN2/SH3PXD2B/CNTN1/BMP3/PRRX1/LOXL1/CXCL13/PRTG/ANTXR1/CD300C/SNX20/MMP16/ITGA4/DAB2/PCDH18/CD248/PDGFRB/TYROBP/AQP1/MEX3B/ARL4C/CD83/SULF1/BCAT1/NFIX/CHSY3/DBX2/PCDH19/PAPPA/C1QA/MYH10/GLIS2/C1QC/TRIL/TGFBI/TMEM132E/SOCS1/MYCN/MATN2/ANPEP	64
KEGG_FOCAL_ADHESION	KEGG_FOCAL_ADHESION	42/1154	199/20738	4.98901e-14	3.08072e-12	2.26694e-12	MYLK/IGF1/FLNA/FLNC/PRKCB/PARVA/COL6A6/BCL2/THBS4/LAMA4/ITGA1/PIK3CG/TNC/PPP1R12A/VEGFC/TNN/VAV1/TLN1/COL3A1/PIK3CD/ACTN1/TNR/VCL/ITGB3/SHC4/COL6A3/RAC2/COL5A1/COL1A2/RELN/ITGA4/PDGFRB/FN1/COL1A1/COL4A2/COL5A2/THBS2/ITGA11/SPP1/CAV2/CCND2/RASGRF1	42
GAL_LEUKEMIC_STEM_CELL_DN	GAL_LEUKEMIC_STEM_CELL_DN	46/1154	235/20738	5.8854e-14	3.57466e-12	2.6304e-12	PPP1R12B/CDC42EP3/LAMA4/IGFBP7/FGL2/LGALS1/ELANE/GPR18/CX3CR1/MRC2/MS4A6A/ADAP2/GPR65/MAFB/MS4A4A/TRAC/VCAN/C3AR1/NCF1/AOAH/CD93/STX11/SLC15A3/LILRB1/CD86/CD14/FCGR2A/IGSF6/C1QA/CCR1/RNASE2/CST4/MNDA/CHST15/FPR1/CCL5/CXCR3/LILRB4/PILRA/TNFAIP6/CEBPE/CD38/GPC5/FCGR1A/GDF3/CLC	46
LIAN_LIPA_TARGETS_6M	LIAN_LIPA_TARGETS_6M	26/1154	81/20738	1.08003e-13	6.45404e-12	4.74919e-12	FCGR2B/MPEG1/TLR7/MS4A7/MS4A6A/MAFB/MSR1/CD84/GPNMB/C3AR1/KLRB1/TREM2/RGS1/SLC15A3/PAPPA/SEMA7A/IGSF6/C1QA/C1QC/CCR1/C1QB/FCGR3A/SLC37A2/LILRB4/SPIC/ADGRE3	26
PASINI_SUZ12_TARGETS_DN	PASINI_SUZ12_TARGETS_DN	54/1154	317/20738	1.5968e-13	9.3907e-12	6.91013e-12	PDLIM3/GLI3/CALD1/FLNA/TUBA1A/FLNC/CNN1/FILIP1L/GNG2/SYT11/PARVA/PRICKLE1/LPP/AXL/VIM/MSN/WWTR1/SH3BGRL/LPAR4/LGALS1/NCS1/TIMP2/COL3A1/AMOTL1/LIMD2/PRNP/PPP1R18/ACTN1/IGFBP4/VCL/ETS1/TSPAN2/VGLL3/PRTG/DOCK11/CMTM3/NREP/COL5A1/COL1A2/VCAN/MYADM/PKIA/FN1/LTB/COL1A1/ARL4C/SULF1/PXDN/TGFB2/SEMA3C/MYH10/POU3F1/CAV2/TENM3	54
RUTELLA_RESPONSE_TO_HGF_UP	RUTELLA_RESPONSE_TO_HGF_UP	64/1154	422/20738	2.34726e-13	1.35884e-11	9.99903e-12	RFTN1/KCNMA1/FILIP1L/ZNF804A/PTGDS/LPXN/CCL19/PPP1R12A/TM6SF1/CLIC2/TIMP2/ENTPD1/TBC1D1/CD1E/RAB8B/CCSER2/EBI3/TLR1/CTSK/LAIR1/LTBP2/LHFPL2/ROBO1/ARHGAP22/MMP2/CCR7/SPARC/RGL1/CRIM1/CCL2/CD84/EPB41L3/NRP1/DAB2/IL21R/GPNMB/C3AR1/LXN/CCR5/CMKLR1/CYBB/C3/BCAT1/CCL13/CTSL/KMO/C1QA/CCR1/APOE/CD209/CRTAM/CCL22/CHST15/APOC1/CSF2RA/LILRB4/TNFAIP6/CCL17/SPP1/FCGR1A/ADAM12/ADAMDEC1/NKG7/IDO1	64
LINDGREN_BLADDER_CANCER_HIGH_RECURRENCE	LINDGREN_BLADDER_CANCER_HIGH_RECURRENCE	20/1154	48/20738	2.5956e-13	1.47949e-11	1.08868e-11	MGP/MYLK/MOB3A/MSN/LAMA4/LGALS1/NRP2/ADAM19/AEBP1/VCAM1/PRRX1/SPARC/COL1A2/VCAN/MYADM/HTRA3/MICAL2/COL4A2/PAPPA/COL5A2	20
RIGGI_EWING_SARCOMA_PROGENITOR_UP	RIGGI_EWING_SARCOMA_PROGENITOR_UP	65/1154	434/20738	2.7425e-13	1.53954e-11	1.13286e-11	IGF1/FLRT2/PRKCB/PLXDC2/FAT4/HVCN1/HMCN1/PTGDS/ARHGDIB/A2M/SHISA3/FAM43B/PLCG2/TNC/BHLHE22/TCF4/EPHA3/TM6SF1/LAPTM5/CDH11/EDNRA/FRZB/NGFR/TSPAN11/S1PR3/EBF2/NRK/HIVEP3/NOS1/MAFB/PLA2G4C/SLC24A3/RGS18/F2R/P2RX7/RELN/ITGA4/C3AR1/TGFB1/MAPT/JAK3/PCDH7/ITGB2/FZD1/PCDH17/SV2B/CD14/KMO/LRRC4C/CST6/HDAC9/FREM1/WT1/NPR3/CSRNP3/ENPEP/CD274/NLGN4X/LYPD1/SPP1/ITGAM/CCND2/GNA14/UTS2/DKK2	65
REACTOME_INTEGRIN_CELL_SURFACE_INTERACTIONS	REACTOME_INTEGRIN_CELL_SURFACE_INTERACTIONS	26/1154	85/20738	3.87535e-13	2.14301e-11	1.57693e-11	COL6A6/LUM/ITGA1/TNC/FBN1/COL8A1/COL3A1/VCAM1/ITGB3/COL6A3/PECAM1/ITGAD/COL5A1/COL1A2/ITGA4/ITGAL/CD44/FN1/COL1A1/ITGB2/COL4A2/COL5A2/ITGA11/SPP1/ITGAM/COL10A1	26
REACTOME_GENERATION_OF_SECOND_MESSENGER_MOLECULES	REACTOME_GENERATION_OF_SECOND_MESSENGER_MOLECULES	18/1154	39/20738	4.7015e-13	2.56163e-11	1.88497e-11	WAS/PLCG2/CD4/CD3G/TRAV8-4/HLA-DQA2/TRAV29DV5/CD3D/HLA-DQB2/TRBV7-9/CD3E/LCK/HLA-DPB1/HLA-DRA/TRBV12-3/TRAV19/HLA-DPA1/HLA-DQA1	18
VERHAAK_AML_WITH_NPM1_MUTATED_DN	VERHAAK_AML_WITH_NPM1_MUTATED_DN	46/1154	250/20738	6.10494e-13	3.27809e-11	2.41217e-11	MEF2C/FCER1A/CD1C/MDFIC/STAP1/MYH11/NRXN2/CD19/IGFBP7/SPON1/TM6SF1/ELANE/FCMR/PTPRCAP/THSD7A/EHD3/CD200/LDLRAD4/CD48/BANK1/LHFPL2/ROBO1/SPARC/GATA3/IFI16/PDE4B/SERPINE2/RGS1/MN1/TRBC2/GJA1/PXDN/BPI/CD3D/CD2/SPIB/TGFBI/CIITA/HLA-DPB1/NPR3/CD38/CST7/HLA-DPA1/CCND2/HLA-DQA1/LAMP5	46
REACTOME_PEPTIDE_LIGAND_BINDING_RECEPTORS	REACTOME_PEPTIDE_LIGAND_BINDING_RECEPTORS	40/1154	198/20738	8.92558e-13	4.72418e-11	3.47628e-11	TACR2/CCL19/TACR1/GRPR/PENK/CX3CR1/EDNRA/TAC1/UTS2B/CCR7/F2R/CXCL13/MLNR/C5AR1/AGTR2/CXCR4/CCL2/CCL21/CCR4/PMCH/C3AR1/CCR5/C3/FPR3/CCL13/APLNR/CCR1/CXCR5/AGT/CCL22/FPR1/CCL5/CXCR3/CCL17/CCR9/XCL2/NPBWR1/KEL/UTS2/PYY	40
FULCHER_INFLAMMATORY_RESPONSE_LECTIN_VS_LPS_DN	FULCHER_INFLAMMATORY_RESPONSE_LECTIN_VS_LPS_DN	65/1154	451/20738	1.62929e-12	8.50213e-11	6.25627e-11	SLC8A1/LY86/PRICKLE1/CD37/GNB4/HEG1/CCL19/FGL2/CSGALNACT2/MS4A7/C1orf162/CXorf21/MS4A6A/PLEKHA2/MYO1G/SUCNR1/SGTB/MAFB/CTSK/LAIR1/MS4A4A/PDGFRL/PECAM1/KCTD12/AIF1/DOCK11/NOTCH2/OLFML2B/SPN/CD84/NREP/IFI16/LST1/CD4/GPNMB/C3AR1/TLR4/NCF1/LXN/CCR5/CMKLR1/DYSF/ARL4C/HAMP/FAS/APOBEC3G/OTOA/CD14/HLA-DMB/TGFBI/NFAM1/MNDA/FCGR3A/FPR1/APOC1/TNFAIP6/TLR8/SDS/CD38/FCGR1A/AIM2/CHI3L2/GPR1/HS3ST2/IDO1	65
TAKEDA_TARGETS_OF_NUP98_HOXA9_FUSION_16D_UP	TAKEDA_TARGETS_OF_NUP98_HOXA9_FUSION_16D_UP	37/1154	176/20738	1.8114e-12	9.32116e-11	6.85895e-11	GAPT/IL31RA/CDC42EP3/CD1C/NAPSB/LTBP1/LUM/CLECL1/MAP4K1/FGL2/TESPA1/BEND6/GPR18/FCER2/ADAM19/ADGRA2/BTLA/RAB33A/IKZF1/CD1E/S1PR3/ABCD2/SLITRK4/LILRA1/FN1/GPX7/ZNF366/GPR82/HLA-DPB2/HDAC9/WT1/CHST2/TIFAB/CD38/CLNK/IDO1/LAMP5	37
IGLESIAS_E2F_TARGETS_UP	IGLESIAS_E2F_TARGETS_UP	32/1154	135/20738	1.89148e-12	9.59993e-11	7.06409e-11	OGN/LYL1/LUM/LAMA4/LGALS1/ANGPTL2/LAPTM5/FMO1/COL3A1/FBLN2/LCP1/IGFBP4/COL15A1/COL6A3/SPARC/CXCL13/COL1A2/DAB2/TYROBP/COL1A1/C3/GJA1/POSTN/COL5A2/C1QA/C1QC/MRC1/APOE/C1QB/CD74/GBP4/CCND2	32
KEGG_ECM_RECEPTOR_INTERACTION	KEGG_ECM_RECEPTOR_INTERACTION	25/1154	84/20738	2.18072e-12	1.07727e-10	7.9271e-11	COL6A6/THBS4/LAMA4/ITGA1/TNC/TNN/COL3A1/TNR/ITGB3/COL6A3/SDC3/COL5A1/COL1A2/RELN/ITGA4/CD44/FN1/COL1A1/COL4A2/SV2B/GP1BA/COL5A2/THBS2/ITGA11/SPP1	25
ONDER_CDH1_SIGNALING_VIA_CTNNB1	ONDER_CDH1_SIGNALING_VIA_CTNNB1	25/1154	84/20738	2.18072e-12	1.07727e-10	7.9271e-11	KCNMA1/MAP1B/LTBP1/PRUNE2/IGFBP7/FBN1/GREM1/CDH11/SCG5/DOCK10/LTBP2/BGN/SPOCK1/COL6A3/ARHGAP22/PRRX1/NREP/COL1A2/VCAN/MICAL2/CD83/C3/TRBC2/POSTN/SEMA3C	25
LIAN_LIPA_TARGETS_3M	LIAN_LIPA_TARGETS_3M	22/1154	65/20738	2.51374e-12	1.22545e-10	9.01742e-11	FCGR2B/MPEG1/TLR7/MS4A7/MS4A6A/MAFB/MSR1/GPNMB/C3AR1/KLRB1/TREM2/RGS1/SLC15A3/SEMA7A/IGSF6/C1QA/C1QC/CCR1/C1QB/LILRB4/SPIC/ADGRE3	22
NABA_ECM_GLYCOPROTEINS	NABA_ECM_GLYCOPROTEINS	39/1154	196/20738	2.83222e-12	1.36277e-10	1.00279e-10	MGP/ECM2/LTBP1/THBS4/HMCN1/LAMA4/IGFBP7/PCOLCE/FGL2/LGI2/TNC/SPON1/FBN1/AEBP1/TNN/FBLN2/TNR/IGFBP4/SRPX2/LTBP2/SPARC/CRIM1/RELN/NTNG2/CRISPLD1/FNDC1/FN1/NTN3/PXDN/POSTN/THBS2/TGFBI/TNFAIP6/CTHRC1/SPP1/NELL1/CILP2/MATN2/NDNF	39
KEGG_INTESTINAL_IMMUNE_NETWORK_FOR_IGA_PRODUCTION	KEGG_INTESTINAL_IMMUNE_NETWORK_FOR_IGA_PRODUCTION	19/1154	48/20738	3.10696e-12	1.47078e-10	1.08227e-10	TNFRSF13C/CD28/CXCR4/CD40LG/ITGA4/TNFSF13B/TGFB1/HLA-DQA2/CD86/HLA-DMB/AICDA/HLA-DPB1/HLA-DRA/HLA-DOA/IL5/CCR9/IL6/HLA-DPA1/HLA-DQA1	19
PETROVA_ENDOTHELIUM_LYMPHATIC_VS_BLOOD_DN	PETROVA_ENDOTHELIUM_LYMPHATIC_VS_BLOOD_DN	35/1154	162/20738	3.13607e-12	1.47078e-10	1.08227e-10	LYL1/CDC42EP3/EMP3/AXL/ARHGDIB/RGS4/CAP2/LPXN/SELP/COL8A1/VEGFC/PRNP/BASP1/SRPX2/LTBP2/BGN/ARHGAP22/NPTX1/RAC2/CXCR4/CCL2/AHNAK2/COL1A2/VCAN/FAP/PKIA/SRGN/CD44/ARL4C/RRAS/TFEC/TGFBI/IL6/ANPEP/UCHL1	35
DURAND_STROMA_S_UP	DURAND_STROMA_S_UP	48/1154	281/20738	3.25246e-12	1.5063e-10	1.10841e-10	CCDC80/IGF1/RASSF2/RNF150/DPYSL3/FAT4/PRUNE2/AKAP6/RGS4/LPAR4/SELP/ADAM19/CTSO/SFRP2/COL3A1/PLEKHA2/THSD7A/EHD3/SORCS2/SRPX2/LTBP2/SDC3/MMP2/LOXL1/GATA3/COL1A2/NFATC1/HTRA3/CD248/PDGFRB/JAK3/COL1A1/FZD1/MN1/CALCRL/LRRC4C/PAPPA/POSTN/PHOSPHO1/TGFBI/NPR3/CCL5/SYN1/SPP1/ADAMTS2/MATN2/ADAM12/CAPN6	48
MORI_LARGE_PRE_BII_LYMPHOCYTE_DN	MORI_LARGE_PRE_BII_LYMPHOCYTE_DN	21/1154	60/20738	3.75469e-12	1.71392e-10	1.26118e-10	CD79B/LY86/DTX1/CD22/WIPF1/LPP/PIP4K2A/CNR2/MS4A1/LAT2/PTPRC/LCP1/SLC25A53/GPR65/VCAM1/LTB/CD83/HLA-DMB/CXCR5/CD74/HLA-DQA1	21
WANG_MLL_TARGETS	WANG_MLL_TARGETS	49/1154	292/20738	3.79329e-12	1.71392e-10	1.26118e-10	CCDC80/MGP/COL14A1/HTR2A/EBF1/ASPN/GLT8D2/ARHGDIB/OMD/LPXN/ADAM19/MRC2/FRZB/VEGFC/SFRP2/CPZ/S1PR3/MAFB/TMEM119/ISLR/SHC4/NFIA/MMP2/FOXS1/PCDHB7/GATA3/DKK3/DAB2/SH3RF3/TREM2/DPYD/GPX7/CYS1/PLEK/SCARF2/CD14/BNC1/POSTN/HDAC9/THBS2/TGFBI/AGT/ENPEP/KCNC2/IL6/FOXC2/EGR3/NDNF/COL10A1	49
REACTOME_COSTIMULATION_BY_THE_CD28_FAMILY	REACTOME_COSTIMULATION_BY_THE_CD28_FAMILY	23/1154	74/20738	6.05876e-12	2.70454e-10	1.99013e-10	VAV1/BTLA/CD28/CD4/CD3G/PDCD1LG2/TRAV8-4/HLA-DQA2/TRAV29DV5/CD86/CD3D/HLA-DQB2/TRBV7-9/CD3E/LCK/HLA-DPB1/CD274/HLA-DRA/PDCD1/TRBV12-3/TRAV19/HLA-DPA1/HLA-DQA1	23
TAKEDA_TARGETS_OF_NUP98_HOXA9_FUSION_10D_DN	TAKEDA_TARGETS_OF_NUP98_HOXA9_FUSION_10D_DN	33/1154	150/20738	7.72316e-12	3.40647e-10	2.50664e-10	FCER1A/A2M/NRP2/TLR7/MSC-AS1/SGTB/TSPAN2/LHFPL2/RGL1/C5AR1/OLFML2B/NRP1/DAB2/GPNMB/RTN1/TREM2/PPP2R2B/FPR3/CCL13/BPI/OTOA/C1QA/C1QC/TGFBI/APOE/C1QB/TRAV22/RASGRP1/CEBPE/MEIKIN/CST7/HS3ST2/ADGRE3	33
BIOCARTA_THELPER_PATHWAY	BIOCARTA_THELPER_PATHWAY	10/1154	12/20738	1.63377e-11	7.12132e-10	5.24021e-10	THY1/PTPRC/CD28/CD4/ITGAL/ITGB2/CD3G/CD3D/CD2/CD3E	10
KEGG_CYTOKINE_CYTOKINE_RECEPTOR_INTERACTION	KEGG_CYTOKINE_CYTOKINE_RECEPTOR_INTERACTION	45/1154	265/20738	1.90658e-11	8.21382e-10	6.04412e-10	TNFRSF13C/CCL19/CX3CR1/VEGFC/CD27/NGFR/TNFSF8/CCR7/CXCL13/LTA/CXCR4/CCL2/CCL21/CD40LG/CCR4/TNFSF13B/IL21R/PDGFRB/CSF2RB/TGFB1/CCR5/LTB/FAS/CCL13/CRLF2/IL12B/TGFB2/CCR1/CXCR5/IL12RB1/IL21/IL9R/CCL26/CD70/CCL22/GDF5/CCL5/CXCR3/CSF2RA/CCL17/IL5/CCR9/IL6/XCL2/TNFSF18	45
KEGG_LEISHMANIA_INFECTION	KEGG_LEISHMANIA_INFECTION	22/1154	72/20738	2.54914e-11	1.08558e-09	7.98824e-10	PRKCB/CR1/ITGA4/TGFB1/TLR4/NCF1/ITGB2/C3/HLA-DQA2/IL12B/TGFB2/FCGR2A/HLA-DMB/HLA-DPB1/FCGR3A/JAK2/HLA-DRA/HLA-DOA/ITGAM/FCGR1A/HLA-DPA1/HLA-DQA1	22
BOYLAN_MULTIPLE_MYELOMA_C_D_DN	BOYLAN_MULTIPLE_MYELOMA_C_D_DN	46/1154	278/20738	2.85088e-11	1.20029e-09	8.83228e-10	RGS13/MDFIC/MS4A1/LPAR4/ITGA1/FGL2/SPON1/ELANE/ENTPD1/GIMAP4/GPR183/BASP1/VCAM1/GVINP1/TSPAN2/MS4A4A/CD28/RGS18/F2R/ZBTB20/IFI16/ITGAL/MYO1F/SH2D1A/LTB/ARL4C/PLEK/C3/CD3G/TFEC/CD3D/EOMES/HP/IGSF6/TGFBI/LAX1/CD3E/MNDA/FPR1/CCL5/LILRB4/TIAM1/CCND2/CTSW/RNASE3/NKG7	46
REN_ALVEOLAR_RHABDOMYOSARCOMA_DN	REN_ALVEOLAR_RHABDOMYOSARCOMA_DN	58/1154	407/20738	4.16829e-11	1.73523e-09	1.27686e-09	MYLK/RFTN1/RAB23/DPYSL3/FSTL1/PARVA/LPP/AXL/MSN/LAMA4/IGFBP7/PCOLCE/MBNL1/FBN1/RAB31/COL8A1/TIMP2/MRC2/VEGFC/TLN1/ACTN1/GLIPR1/ITGBL1/SRPX2/ELK3/SWAP70/HTRA1/MMP2/LOXL1/LOX/ENG/TIMP1/COL5A1/NRP1/DAB2/VCAN/CD248/FAP/PDGFRB/TGFB1/GPR176/FN1/LXN/SERPINE2/COL1A1/ARL4C/FZD1/RRAS/GJA1/TFPI2/RCN3/COL5A2/SEMA3C/THBS2/TGFBI/TWIST1/ADAMTS2/CAV2	58
LINDVALL_IMMORTALIZED_BY_TERT_DN	LINDVALL_IMMORTALIZED_BY_TERT_DN	22/1154	74/20738	4.66571e-11	1.92072e-09	1.41336e-09	CCDC80/CPXM2/MAP1B/LAMA4/FBXO32/CDON/CTSK/ISLR/LTBP2/SH3PXD2B/LHFPL2/ANTXR1/VCAN/FAP/FNDC1/FN1/ARL4C/SELPLG/PAPPA/ADAM12/LRRC15/MMP7	22
WAMUNYOKOLI_OVARIAN_CANCER_LMP_DN	WAMUNYOKOLI_OVARIAN_CANCER_LMP_DN	37/1154	198/20738	7.01052e-11	2.85428e-09	2.10032e-09	CCDC80/BNC2/GLI3/CALD1/FLRT2/FLNC/OLFML1/DPYSL3/LIX1L/CAP2/LAMA4/CSGALNACT2/TCF4/COL8A1/CDON/DOK5/PRNP/BASP1/CTSK/AP1S2/HTRA1/RGL1/DOCK11/ZBTB20/IFI16/DAB2/GPNMB/SPOCK2/DPYD/LXN/SULF1/TGFB2/MYH10/MNDA/WT1/TIAM1/LINC01116	37
LENAOUR_DENDRITIC_CELL_MATURATION_DN	LENAOUR_DENDRITIC_CELL_MATURATION_DN	29/1154	130/20738	9.9701e-11	4.01513e-09	2.95453e-09	EMP3/CD37/ARHGDIB/FGL2/CORO1A/CLEC2B/EVI2A/CD180/TLR1/CTSK/ELK3/LHFPL2/HTRA1/C5AR1/LST1/ITGAL/C3AR1/RTN1/NCF1/CD44/CYBB/C3/BCAT1/CD14/FCGR2A/BST1/OLR1/UPK2/ANPEP	29
VILIMAS_NOTCH1_TARGETS_UP	VILIMAS_NOTCH1_TARGETS_UP	18/1154	51/20738	1.11139e-10	4.42765e-09	3.25808e-09	DTX1/THY1/P2RY10/CD28/CCR7/GATA3/NFATC1/TRAT1/CD83/CD3G/IL12B/CD86/CD3D/CD2/LCK/PTCRA/CCL5/CD74	18
SENESE_HDAC2_TARGETS_DN	SENESE_HDAC2_TARGETS_DN	29/1154	131/20738	1.21342e-10	4.78269e-09	3.51933e-09	BNC2/SYT11/LUM/CAP2/IGFBP7/TMEM255A/NRXN3/CDH11/COL3A1/SPX/GXYLT2/FOXS1/LOXL1/SESN3/ZBTB20/LOX/GPNMB/KRT81/AQP1/DACT1/COL1A1/PPP2R2B/COL5A2/SFTA1P/TMEM200C/CCL26/SPP1/MATN2/LINC01116	29
REACTOME_DEGRADATION_OF_THE_EXTRACELLULAR_MATRIX	REACTOME_DEGRADATION_OF_THE_EXTRACELLULAR_MATRIX	30/1154	140/20738	1.37024e-10	5.34394e-09	3.93233e-09	COL14A1/COL6A6/ADAMTS16/A2M/FBN1/ELANE/COL8A1/TIMP2/COL3A1/CTSK/COL15A1/COL6A3/HTRA1/MMP2/TIMP1/MMP16/COL5A1/COL1A2/CD44/FN1/COL1A1/COL4A2/CTSL/COL5A2/COL12A1/SPP1/CAPN6/CTRB1/COL10A1/MMP7	30
REACTOME_PLATELET_ACTIVATION_SIGNALING_AND_AGGREGATION	REACTOME_PLATELET_ACTIVATION_SIGNALING_AND_AGGREGATION	43/1154	261/20738	1.45385e-10	5.61094e-09	4.1288e-09	IGF1/FLNA/PRKCB/GNG2/GNB4/A2M/PIK3CG/PLCG2/SELP/P2RY12/VEGFC/VAV1/TLN1/DGKI/DGKG/ACTN1/GNG13/VCL/ISLR/ITGB3/LHFPL2/PECAM1/SPARC/GNGT2/F2R/RAC2/TIMP1/COL1A2/TGFB1/SRGN/FN1/COL1A1/PCDH7/LEFTY2/PLEK/TGFB2/GP1BA/FERMT3/LCK/CD109/RASGRP1/GNA14/CTSW	43
KLEIN_PRIMARY_EFFUSION_LYMPHOMA_DN	KLEIN_PRIMARY_EFFUSION_LYMPHOMA_DN	19/1154	58/20738	1.49718e-10	5.71861e-09	4.20802e-09	CD79B/POU2F2/RASSF2/CD22/LRMP/IGHV5-78/CD52/CD19/MS4A1/CD79A/CD72/SIT1/CD27/ETS1/SWAP70/GPX7/HLA-DMB/SPIB/CXCR5	19
TURASHVILI_BREAST_DUCTAL_CARCINOMA_VS_DUCTAL_NORMAL_UP	TURASHVILI_BREAST_DUCTAL_CARCINOMA_VS_DUCTAL_NORMAL_UP	17/1154	46/20738	1.57727e-10	5.96306e-09	4.3879e-09	ASPN/LUM/FBN1/TLR7/SFRP2/COL3A1/EPB41L3/COL1A2/VCAN/CD44/FN1/COL1A1/SULF1/POSTN/COL5A2/COL10A1/LRRC15	17
KUMAR_TARGETS_OF_MLL_AF9_FUSION	KUMAR_TARGETS_OF_MLL_AF9_FUSION	56/1154	402/20738	2.19068e-10	8.19847e-09	6.03283e-09	MGP/MEF2C/FCER1A/IGF1/FCRLA/EBF1/GNB4/CD19/MS4A1/CD79A/MBNL1/CD72/RAB31/PENK/SIT1/FCER2/GIMAP4/PTPRCAP/THY1/CD27/REM1/BASP1/SLC25A53/VCAM1/MS4A4A/F2R/PAX5/GATA3/CYP7B1/CD6/LTB/CDH5/CD83/SEMA6B/NFIX/EOMES/POSTN/CD2/FERMT3/SPIB/C1QC/MRC1/CD3E/MNDA/CXCR5/LCK/ENPEP/CCL5/CXCR3/LILRB4/SPIC/SPP1/FCGR1A/CCR9/CTSW/RNASE3	56
BIOCARTA_NKT_PATHWAY	BIOCARTA_NKT_PATHWAY	13/1154	26/20738	2.42163e-10	8.97214e-09	6.60213e-09	CD28/CCR7/CXCR4/CD40LG/CCR4/CD4/TGFB1/CCR5/TGFB2/CCR1/IL12RB1/CXCR3/IL5	13
KEGG_CHEMOKINE_SIGNALING_PATHWAY	KEGG_CHEMOKINE_SIGNALING_PATHWAY	35/1154	189/20738	2.95413e-10	1.08367e-08	7.97415e-09	PRKCB/GNG2/GNB4/WAS/PIK3CG/CCL19/ELMO1/CX3CR1/VAV1/PIK3CD/GNG13/SHC4/CCR7/GNGT2/CXCL13/RAC2/CXCR4/CCL2/CCL21/CCR4/JAK3/NCF1/CCR5/CCL13/CCR1/CXCR5/CCL26/JAK2/CCL22/CCL5/CXCR3/TIAM1/CCL17/CCR9/XCL2	35
REACTOME_ASSEMBLY_OF_COLLAGEN_FIBRILS_AND_OTHER_MULTIMERIC_STRUCTURES	REACTOME_ASSEMBLY_OF_COLLAGEN_FIBRILS_AND_OTHER_MULTIMERIC_STRUCTURES	19/1154	61/20738	4.00116e-10	1.45336e-08	1.06945e-08	COL14A1/COL6A6/PCOLCE/COL8A1/COL3A1/COL15A1/COL6A3/LOXL1/LOX/COL5A1/COL1A2/COL1A1/COL4A2/PXDN/CTSL/COL5A2/COL12A1/COL10A1/MMP7	19
WOO_LIVER_CANCER_RECURRENCE_UP	WOO_LIVER_CANCER_RECURRENCE_UP	25/1154	105/20738	4.46895e-10	1.60752e-08	1.18289e-08	MGP/MEF2C/FLNA/DPYSL3/BCL2/LAMA4/MAB21L2/EPHA3/COL6A3/SGCB/NOTCH2/LOX/CCL2/COL1A2/DAB2/TGFB1/TREM2/COL1A1/FZD1/RGS1/TGFB2/POSTN/SEMA3C/SOCS1/CCND2	25
LEE_NEURAL_CREST_STEM_CELL_UP	LEE_NEURAL_CREST_STEM_CELL_UP	30/1154	147/20738	4.82624e-10	1.71935e-08	1.26518e-08	BCHE/SGCD/MEF2C/COL14A1/LUM/SCRG1/IGFBP7/LGALS1/NRP2/EDNRA/COL3A1/NGFR/DCX/AP1S2/BGN/ELK3/MOXD1/COL1A2/IFI16/ITGA4/FAP/DACT1/DPYD/LZTS1/POSTN/SEMA3C/TRIL/TGFBI/NPR3/SPP1	30
PLASARI_TGFB1_TARGETS_10HR_DN	PLASARI_TGFB1_TARGETS_10HR_DN	41/1154	252/20738	5.74559e-10	2.02737e-08	1.49184e-08	MEF2C/IGF1/OGN/FGF7/SYT11/FAT4/LUM/SH3BGRL/LPAR4/LAMA4/ZNF521/HACD4/EVI2A/ZFHX4/THSD7A/S1PR3/RAB30/VCAM1/PDE5A/NFIA/SLC24A3/PRRX1/SESN3/AGTR2/MMP16/DAB2/TSHZ1/CYP7B1/C3AR1/AQP1/PCDH7/PLEK/CD93/NFIX/TRPS1/DDIT4L/MRC1/KCND2/NPR3/LILRB4/SEMA3A	41
REACTOME_ECM_PROTEOGLYCANS	REACTOME_ECM_PROTEOGLYCANS	21/1154	76/20738	5.8159e-10	2.03282e-08	1.49585e-08	ASPN/COL6A6/LUM/LAMA4/TNC/TNN/COL3A1/TNR/BGN/ITGB3/COL6A3/SPARC/COL5A1/COL1A2/VCAN/TGFB1/FN1/COL1A1/COL4A2/TGFB2/COL5A2	21
REACTOME_G_ALPHA_I_SIGNALLING_EVENTS	REACTOME_G_ALPHA_I_SIGNALLING_EVENTS	55/1154	403/20738	6.86629e-10	2.37753e-08	1.7495e-08	GNG2/RGS13/GNB4/RGS4/CNR2/CCL19/GPR18/PENK/CX3CR1/P2RY12/GPC6/GPR183/SUCNR1/S1PR3/GPSM3/GNG13/SDC3/CCR7/RGS18/ABCA4/GNGT2/CXCL13/RGS8/C5AR1/AGTR2/CXCR4/CCL21/CCR4/PMCH/PDE4B/C3AR1/CCR5/RGS1/C3/TAS1R3/FPR3/CCL13/P2RY13/RGS19/APLNR/CCR1/APOE/CXCR5/ADORA1/AGT/FPR1/CCL5/CXCR3/GPC5/CCR9/APOC2/GPR31/GRM7/NPBWR1/PYY	55
PANGAS_TUMOR_SUPPRESSION_BY_SMAD1_AND_SMAD5_UP	PANGAS_TUMOR_SUPPRESSION_BY_SMAD1_AND_SMAD5_UP	28/1154	132/20738	7.18773e-10	2.4626e-08	1.8121e-08	NHSL2/RFTN1/FSTL1/EMP3/WIPF1/PRUNE2/BAG2/TCF4/LAPTM5/ZNF423/LCP1/SORCS2/C16orf54/ETS1/GXYLT2/MMP2/ALDH1B1/NFATC1/PKIA/NFIX/C1QA/TGFBI/MNDA/COL12A1/DOC2B/CAV2/GNA14/MATN2	28
KUROZUMI_RESPONSE_TO_ONCOCYTIC_VIRUS	KUROZUMI_RESPONSE_TO_ONCOCYTIC_VIRUS	16/1154	44/20738	7.24489e-10	2.4626e-08	1.8121e-08	CCR7/ITGAD/LTA/CCL2/CD40LG/CCR4/CCR5/LTB/C3/CCR1/CXCR5/CCL22/CCL5/CXCR3/SPP1/CCR9	16
LENAOUR_DENDRITIC_CELL_MATURATION_UP	LENAOUR_DENDRITIC_CELL_MATURATION_UP	26/1154	116/20738	8.24644e-10	2.77755e-08	2.04386e-08	CD1C/A2M/FCER2/RNASE6/CR1/CCR7/STAC/CD83/CCL13/CD86/FCGR2A/SEMA3C/MRC1/APOE/C1QB/HLA-DPB1/CCL22/APOC1/TNFAIP6/CCL17/SPP1/CD74/HLA-DPA1/CCND2/HLA-DQA1/IDO1	26
PETROVA_PROX1_TARGETS_DN	PETROVA_PROX1_TARGETS_DN	18/1154	57/20738	8.98864e-10	3.00026e-08	2.20774e-08	LYL1/EMP3/AXL/ARHGDIB/RGS4/CAP2/LPXN/SELP/PRNP/LTBP2/ARHGAP22/CCL2/NRP1/VCAN/FAP/SRGN/TFEC/IL6	18
BIOCARTA_TCYTOTOXIC_PATHWAY	BIOCARTA_TCYTOTOXIC_PATHWAY	9/1154	12/20738	9.37871e-10	3.10251e-08	2.28298e-08	THY1/PTPRC/CD28/ITGAL/ITGB2/CD3G/CD3D/CD2/CD3E	9
ZHENG_BOUND_BY_FOXP3	ZHENG_BOUND_BY_FOXP3	62/1154	487/20738	9.64814e-10	3.16339e-08	2.32778e-08	GNG2/RGS13/MDFIC/WIPF1/BCL2/AXL/ARHGAP15/PIP4K2A/TLR6/ARHGAP25/PIK3CG/TESPA1/MBNL1/BEND6/ELMO1/SELP/GPR18/MS4A7/ADAM19/CX3CR1/ST6GALNAC5/GIMAP4/ST8SIA4/GPR183/RHOH/BTLA/PTPRC/CD200/LCP1/LDLRAD4/RAB8B/CD53/GPR65/SELL/P2RY10/GVINP1/ETS1/DOCK10/MS4A4A/ELK3/CD28/LRRC8C/CCR7/TMEM252/GATA3/SLAMF6/ZBTB20/ANKRD55/NRP1/PDE4B/SH2D1A/TRAT1/CD200R1/CD44/FAS/RGS1/SAMSN1/THEMIS/CD96/TLR8/SPP1/AIM2	62
PID_IL4_2PATHWAY	PID_IL4_2PATHWAY	19/1154	64/20738	1.00153e-09	3.25496e-08	2.39516e-08	SELP/FCER2/THY1/ETS1/ITGB3/LTA/MYBL1/CD40LG/COL1A2/SPI1/JAK3/COL1A1/DOK2/AICDA/CCL26/JAK2/CCL17/SOCS1/IL5	19
PASQUALUCCI_LYMPHOMA_BY_GC_STAGE_DN	PASQUALUCCI_LYMPHOMA_BY_GC_STAGE_DN	32/1154	170/20738	1.10854e-09	3.57142e-08	2.62802e-08	VPREB3/FCRLA/EBF1/CD22/PRKCB/LRMP/CD37/ARHGAP15/ARHGDIB/CD19/WAS/BAG2/CD79A/MYBPC2/SASH3/CORO1A/PTPRCAP/WDFY4/PLEKHA2/MYO1G/LIMD2/LCP1/ETS1/RBM43/BANK1/CCR7/PAX5/SESN3/MEX3B/BCAT1/KLHL14/RASGRP1	32
CROMER_TUMORIGENESIS_UP	CROMER_TUMORIGENESIS_UP	18/1154	58/20738	1.23598e-09	3.91394e-08	2.88006e-08	LUM/TNC/THY1/COL3A1/ACTN1/SPARC/COL1A2/FAP/FN1/COL4A2/PXDN/POSTN/COL5A2/CHST2/SPP1/IL6/LRRC15/UCHL1	18
REACTOME_CHEMOKINE_RECEPTORS_BIND_CHEMOKINES	REACTOME_CHEMOKINE_RECEPTORS_BIND_CHEMOKINES	18/1154	58/20738	1.23598e-09	3.91394e-08	2.88006e-08	CCL19/CX3CR1/CCR7/CXCL13/CXCR4/CCL2/CCL21/CCR4/CCR5/CCL13/CCR1/CXCR5/CCL22/CCL5/CXCR3/CCL17/CCR9/XCL2	18
DUNNE_TARGETS_OF_AML1_MTG8_FUSION_UP	DUNNE_TARGETS_OF_AML1_MTG8_FUSION_UP	17/1154	52/20738	1.43962e-09	4.52017e-08	3.32616e-08	ATP2B4/IGFBP7/LAPTM5/LCP1/ALOX5AP/CMTM3/CXCR4/LST1/MYO1F/SRGN/BPI/SELPLG/SAMSN1/RNASE2/CST7/RNASE3/NKG7	17
DEURIG_T_CELL_PROLYMPHOCYTIC_LEUKEMIA_DN	DEURIG_T_CELL_PROLYMPHOCYTIC_LEUKEMIA_DN	47/1154	323/20738	1.48558e-09	4.62527e-08	3.40349e-08	PRKCB/SYT11/BCL2/CD52/PJA2/ARHGAP25/HEG1/TESPA1/PPP1R12A/CLEC2B/PTPRC/EVI2B/CCSER2/GPR65/CD48/P2RY10/GZMK/CD28/SGCB/F2R/IKZF3/CD84/PDE4B/TRAV9-2/KLRB1/SRGN/FAS/TRAV8-3/TRBC2/CTSL/CD3D/TRAV8-6/CD2/CHN1/CXCR5/HLA-DPB1/TRAV13-2/TRAV13-1/CRTAM/CCL5/TRAV21/TIAM1/CST7/HLA-DPA1/TRAV36DV7/CTSW/NKG7	47
LIM_MAMMARY_LUMINAL_MATURE_DN	LIM_MAMMARY_LUMINAL_MATURE_DN	23/1154	95/20738	1.55743e-09	4.80856e-08	3.53837e-08	CALD1/FAM49A/FSTL1/PRICKLE1/VIM/ZNF521/FBXO32/AEBP1/ETS1/TSPAN2/HTRA1/KCTD12/CCL2/NREP/MOXD1/DAB2/GPX7/FZD1/COL4A2/FAS/TSHZ2/APOE/IRX1	23
BASSO_CD40_SIGNALING_UP	BASSO_CD40_SIGNALING_UP	24/1154	103/20738	1.59041e-09	4.8698e-08	3.58343e-08	MEF2C/BCL2/NCKAP1L/LGALS1/FCMR/LAPTM5/GPR183/PIK3CD/LHFPL2/CR2/CCR7/RAC2/LTA/PLXNC1/SRGN/CD44/PLEK/CD83/RGS1/CXCR5/HLA-DPB1/CCL22/CD74/HLA-DQA1	24
BIOCARTA_NO2IL12_PATHWAY	BIOCARTA_NO2IL12_PATHWAY	10/1154	16/20738	1.6139e-09	4.90124e-08	3.60656e-08	CD4/CCR5/CD3G/LILRB1/CD3D/CD2/CD3E/IL12RB1/JAK2/CXCR3	10
GRUETZMANN_PANCREATIC_CANCER_UP	GRUETZMANN_PANCREATIC_CANCER_UP	50/1154	357/20738	1.69358e-09	5.10139e-08	3.75385e-08	MGP/MYLK/CALD1/TUBA1A/CNN1/DPYSL3/CD1C/EMP3/LTBP1/MSN/LUM/LAMA4/PLCG2/PCOLCE/FBN1/RAB31/LAPTM5/ENTPD1/PRNP/FBLN2/PTPRC/LCP1/CD53/CTSK/MMP2/SPARC/GSN-AS1/CXCR4/NREP/VCAN/FAP/PDGFRB/SRGN/FN1/DPYD/COL1A1/ITGB2/PXDN/CTSL/CD86/POSTN/COL5A2/BST1/MYH10/THBS2/FCGR3A/HLA-DRA/APOC1/TNFAIP6/CAV2	50
BOYLAN_MULTIPLE_MYELOMA_PCA1_UP	BOYLAN_MULTIPLE_MYELOMA_PCA1_UP	26/1154	121/20738	2.16377e-09	6.41342e-08	4.7193e-08	LPAR4/ITGA1/FGL2/SPON1/ELANE/GIMAP4/BASP1/MS4A4A/F2R/ZBTB20/IFI16/ITGAL/LTB/C3/TFEC/CD3D/HP/IGSF6/TGFBI/MNDA/FPR1/CCL5/LILRB4/CTSW/RNASE3/NKG7	26
MARKEY_RB1_CHRONIC_LOF_DN	MARKEY_RB1_CHRONIC_LOF_DN	26/1154	121/20738	2.16377e-09	6.41342e-08	4.7193e-08	ACTG2/VAV1/PTPRC/CD53/HTRA1/MSR1/CD300C/CCL2/IFI16/SPI1/C3AR1/TYROBP/SRGN/UPK3B/CD14/TGFB2/FERMT3/C1QA/C1QC/SLFN12L/APOE/C1QB/NPR3/LILRB4/IL6/UCHL1	26
CROONQUIST_NRAS_SIGNALING_UP	CROONQUIST_NRAS_SIGNALING_UP	15/1154	41/20738	2.24087e-09	6.58923e-08	4.84867e-08	LY86/LGALS1/FCER2/CX3CR1/RNASE6/ST8SIA4/CD48/MSR1/GPNMB/NCF1C/CYBB/SV2B/CD86/CCL5/TMPRSS15	15
VERHAAK_AML_WITH_NPM1_MUTATED_UP	VERHAAK_AML_WITH_NPM1_MUTATED_UP	33/1154	186/20738	2.94863e-09	8.6021e-08	6.32983e-08	LTBP1/FGL2/CX3CR1/BASP1/MAFB/ITGB3/ARHGAP22/MMP2/PIEZO2/C5AR1/CD300C/EPB41L3/LILRA1/VCAN/C3AR1/TLR4/NCF1/PLEK/SLC15A3/LILRB1/CTSL/CD86/CD14/FCGR2A/C1QA/CCR1/C1QB/FCGR3A/CHST15/FPR1/PILRA/IL6/AIM2	33
ICHIBA_GRAFT_VERSUS_HOST_DISEASE_D7_UP	ICHIBA_GRAFT_VERSUS_HOST_DISEASE_D7_UP	25/1154	115/20738	3.40724e-09	9.86237e-08	7.25721e-08	LY86/PLD4/FGL2/MPEG1/GIMAP4/CD53/VCAM1/MS4A4A/MSR1/CCL2/IFI16/TYROBP/FAS/CD14/HLA-DMB/C1QC/MNDA/C1QB/HLA-DRA/LILRB4/SOCS1/CD74/GBP4/RNASE3/HLA-DQA1	25
IZADPANAH_STEM_CELL_ADIPOSE_VS_BONE_DN	IZADPANAH_STEM_CELL_ADIPOSE_VS_BONE_DN	24/1154	107/20738	3.60551e-09	1.03553e-07	7.61996e-08	CCDC80/IGF1/ATP2B4/ASPN/PTGIS/MYH11/RGS4/LAMA4/TCF4/FBN1/FBXO32/CDH11/SFRP2/VCL/LTBP2/SLC24A3/GATA3/DOCK11/LOX/DAB2/POSTN/COL5A2/MYH10/NPR3	24
JI_CARCINOGENESIS_BY_KRAS_AND_STK11_DN	JI_CARCINOGENESIS_BY_KRAS_AND_STK11_DN	10/1154	17/20738	3.7233e-09	1.06114e-07	7.80838e-08	LUM/VEGFC/ITGBL1/MMP2/LOXL1/CXCL13/TIMP1/PDGFRB/FN1/THBS2	10
RASHI_RESPONSE_TO_IONIZING_RADIATION_6	RASHI_RESPONSE_TO_IONIZING_RADIATION_6	21/1154	84/20738	4.27259e-09	1.20839e-07	8.89194e-08	CD79B/EMP3/PIP4K2A/MS4A1/FCGR2B/LAPTM5/EVI2A/RHOH/PTPRC/FMNL1/IKZF1/CD48/CXCL13/MSC/CXCR4/TYROBP/FAS/SELPLG/FERMT3/CCL5/CSF2RA	21
BROWN_MYELOID_CELL_DEVELOPMENT_UP	BROWN_MYELOID_CELL_DEVELOPMENT_UP	30/1154	161/20738	4.6814e-09	1.31398e-07	9.66892e-08	CD52/MPEG1/ACTN1/NOS1/ABCD2/TCL1A/C5AR1/DAB2/TYROBP/CD44/TREM2/ITGB2/CYBB/AOAH/SIGLEC8/C3/SLC15A3/CCR1/TGFBI/SLFN12L/NFAM1/TIFAB/FPR1/CSF2RA/LILRB4/OLR1/ITGAM/FCGR1A/CCND2/ANPEP	30
DIAZ_CHRONIC_MEYLOGENOUS_LEUKEMIA_DN	DIAZ_CHRONIC_MEYLOGENOUS_LEUKEMIA_DN	25/1154	117/20738	4.96237e-09	1.38237e-07	1.01722e-07	MYLK/LY86/FGL2/ELANE/MS4A6A/PRNP/GLIPR1/CD53/ADAP2/SELL/MAFB/MS4A4A/SGCB/CCR7/GATA3/EPB41L3/DACT1/MN1/HLA-DMB/TGFBI/MNDA/LILRB4/FCGR1A/CST7/NKG7	25
AZARE_NEOPLASTIC_TRANSFORMATION_BY_STAT3_UP	AZARE_NEOPLASTIC_TRANSFORMATION_BY_STAT3_UP	26/1154	126/20738	5.36836e-09	1.48431e-07	1.09223e-07	CALD1/KCNMA1/DPYSL3/MAP1B/EMP3/WIPF1/LTBP1/ARHGDIB/ARHGAP25/LPXN/TNC/GREM1/CDH11/PRNP/SCG5/SPOCK1/COL5A1/IFI16/SRGN/FN1/SERPINE2/PCDH7/ARL4C/APOBEC3G/COL5A2/CCND2	26
ROY_WOUND_BLOOD_VESSEL_UP	ROY_WOUND_BLOOD_VESSEL_UP	16/1154	50/20738	6.23576e-09	1.71137e-07	1.25931e-07	LUM/HEG1/RAB31/ANGPTL2/THY1/COL3A1/SGCB/TIMP1/NRP1/VCAN/CDH5/SULF1/PCDH17/POSTN/COL5A2/CHN1	16
VART_KSHV_INFECTION_ANGIOGENIC_MARKERS_UP	VART_KSHV_INFECTION_ANGIOGENIC_MARKERS_UP	30/1154	163/20738	6.32352e-09	1.72269e-07	1.26764e-07	IGF1/FGF1/HEG1/EPHA3/NRP2/ANGPTL2/TIMP2/FRZB/VEGFC/SFRP2/COL15A1/SFRP4/ITGB3/PECAM1/SPARC/F2R/NOTCH2/CXCR4/ENG/TIMP1/NRP1/TGFB1/CCR5/COL4A2/CALCRL/THBS2/CCL5/SYN1/SPP1/IL6	30
GU_PDEF_TARGETS_UP	GU_PDEF_TARGETS_UP	19/1154	71/20738	6.86238e-09	1.85585e-07	1.36562e-07	ZEB1/WIPF1/VIM/TNC/TCF4/CDH11/PIK3CD/DOCK10/COL6A3/RAC2/DKK3/COL5A1/TGFB1/FN1/COL1A1/FZD1/COL4A2/COL5A2/TGFBI	19
MORI_MATURE_B_LYMPHOCYTE_UP	MORI_MATURE_B_LYMPHOCYTE_UP	22/1154	94/20738	6.939e-09	1.86297e-07	1.37086e-07	MEF2C/LPP/PIP4K2A/MS4A1/LAT2/FCER2/PTPRC/LCP1/EBI3/GPR65/SELL/ABCA1/ETS1/CR2/CD83/HLA-DMB/APOE/CXCR5/JAK2/HLA-DOA/CD74/HLA-DQA1	22
CROONQUIST_STROMAL_STIMULATION_UP	CROONQUIST_STROMAL_STIMULATION_UP	17/1154	57/20738	7.0307e-09	1.87401e-07	1.37899e-07	IGHV5-78/LUM/LAMA4/IGFBP7/BASP1/IGFBP4/COL6A3/SPARC/LOX/COL1A2/VCAN/MICAL2/SULF1/LILRB1/THBS2/TGFBI/IL6	17
REACTOME_COLLAGEN_DEGRADATION	REACTOME_COLLAGEN_DEGRADATION	18/1154	64/20738	7.19615e-09	1.90441e-07	1.40135e-07	COL14A1/COL6A6/ELANE/COL8A1/COL3A1/CTSK/COL15A1/COL6A3/MMP2/COL5A1/COL1A2/COL1A1/COL4A2/CTSL/COL5A2/COL12A1/COL10A1/MMP7	18
THUM_MIR21_TARGETS_HEART_DISEASE_UP	THUM_MIR21_TARGETS_HEART_DISEASE_UP	10/1154	18/20738	7.95829e-09	2.07785e-07	1.52898e-07	ASPN/LUM/IGFBP7/LTBP2/BGN/LOX/COL1A2/COL1A1/POSTN/COL5A2	10
CHYLA_CBFA2T3_TARGETS_UP	CHYLA_CBFA2T3_TARGETS_UP	51/1154	385/20738	7.96368e-09	2.07785e-07	1.52898e-07	VPREB3/EBF1/PLD4/HVCN1/ARHGDIB/FCGR2B/ATP8B4/PLCG2/TM6SF1/ELANE/RAB31/LAPTM5/RASSF8/CX3CR1/PLEKHA2/KLHL5/LMO1/EHD3/LCP1/EVI2B/EBI3/HIVEP3/GPR65/CD48/ABCD2/TMEM119/C1orf54/F2R/P2RX7/ALOX5AP/CXCR4/SPI1/IL21R/KLRB1/CD93/CTSL/TFEC/ATRNL1/SELPLG/HP/IGSF6/TGFBI/CD209/TIFAB/OLR1/CEBPE/GBP4/CST7/CCND2/HLA-DQA1/NKG7	51
ALTEMEIER_RESPONSE_TO_LPS_WITH_MECHANICAL_VENTILATION	ALTEMEIER_RESPONSE_TO_LPS_WITH_MECHANICAL_VENTILATION	25/1154	120/20738	8.57402e-09	2.22145e-07	1.63465e-07	FGL2/SELP/EBI3/GPR65/SELL/C5AR1/CCL2/TIMP1/LST1/VCAN/CSF2RB/PLEK/CYBB/TFPI2/SLC15A3/TFEC/CD14/BST1/CCR1/SLFN12L/CCL17/ITGAM/GBP4/FCGR1A/IL6	25
BOYAULT_LIVER_CANCER_SUBCLASS_G5_DN	BOYAULT_LIVER_CANCER_SUBCLASS_G5_DN	12/1154	28/20738	1.10403e-08	2.82099e-07	2.07582e-07	EMP3/WIPF1/ARHGDIB/RAB31/LAPTM5/CLEC2B/IFI16/DAB2/THEMIS2/ARL4C/HLA-DPB1/HLA-DPA1	12
WILENSKY_RESPONSE_TO_DARAPLADIB	WILENSKY_RESPONSE_TO_DARAPLADIB	12/1154	28/20738	1.10403e-08	2.82099e-07	2.07582e-07	EVI2A/EVI2B/CD48/LAIR1/BIN2/CD4/NCF1/ITGB2/CYBB/CCR1/CCL5/CXCR3	12
MIKKELSEN_MCV6_HCP_WITH_H3K27ME3	MIKKELSEN_MCV6_HCP_WITH_H3K27ME3	55/1154	436/20738	1.18984e-08	3.01942e-07	2.22183e-07	KCNMA1/PTGIS/ZNF804A/GNB4/NRXN2/CHRNA3/FAM43B/LGI2/SPON1/TIMP2/ADGRA2/AEBP1/DOK6/IGSF21/LMO1/MAFB/COL15A1/DHH/SEZ6L/NKX2-5/ALDH1A3/EPB41L3/RELN/NFATC1/P4HA3/CHRDL2/SH3RF3/FGF5/SIX2/CPNE5/WSCD2/DYSF/DRD5/HHIPL1/ABLIM3/CHAT/SEMA7A/TGFBI/FEV/GRID1/TMEM132E/IRX1/KCND3/MIXL1/NELL1/ADAMTS2/DOC2B/FOXC2/MYO16/TMEM215/SYT16/PYY/HS3ST2/LAMP5/NRG3	55
PID_INTEGRIN1_PATHWAY	PID_INTEGRIN1_PATHWAY	18/1154	66/20738	1.23075e-08	3.10198e-07	2.28259e-07	LAMA4/ITGA1/TNC/FBN1/COL3A1/VCAM1/COL6A3/COL5A1/COL1A2/ITGA4/FN1/COL1A1/CD14/COL5A2/THBS2/TGFBI/ITGA11/SPP1	18
BIOCARTA_MONOCYTE_PATHWAY	BIOCARTA_MONOCYTE_PATHWAY	8/1154	11/20738	1.27471e-08	3.19109e-07	2.34816e-07	SELP/SELL/PECAM1/ITGA4/ITGAL/CD44/ITGB2/ITGAM	8
LIU_VAV3_PROSTATE_CARCINOGENESIS_UP	LIU_VAV3_PROSTATE_CARCINOGENESIS_UP	21/1154	89/20738	1.30327e-08	3.24067e-07	2.38464e-07	IGF1/ARHGDIB/TNC/TIMP2/TAC1/C4B/CTSK/LTBP2/TNFSF13B/GPNMB/TYROBP/FN1/ITGB2/CYBB/C3/HDAC9/C1QA/SPP1/CD74/CCND2/MMP7	21
BOSCO_TH1_CYTOTOXIC_MODULE	BOSCO_TH1_CYTOTOXIC_MODULE	24/1154	114/20738	1.36537e-08	3.37246e-07	2.48162e-07	BCL2/FCGR2B/ADAM19/GIMAP4/GZMK/CD28/RGL1/F2R/MYBL1/CD163L1/SAMD3/SH2D1A/TRAT1/CCR5/CMKLR1/HAMP/RNASE2/IL21/SOCS1/SDS/CD38/NKG7/TNFSF18/IDO1	24
HELLER_HDAC_TARGETS_DN	HELLER_HDAC_TARGETS_DN	42/1154	292/20738	1.55318e-08	3.81094e-07	2.80427e-07	KCNN3/LSAMP/LRMP/EMP3/WIPF1/BCL2/CD52/ARHGDIB/MAP4K1/TMEM255A/TCF4/CLIC2/LAPTM5/CLEC2B/CD180/RHOH/LIMD2/PTPRC/FMNL1/EHD3/CD48/DOCK10/CD28/LY96/IL21R/SH2D1A/CD44/FAS/SULF1/GJA1/CRLF2/APOBEC3G/SELPLG/CCR1/INPP5D/CHST15/HLA-DRA/OLR1/CCND2/MYCN/AIM2/TMPRSS15	42
REACTOME_COLLAGEN_FORMATION	REACTOME_COLLAGEN_FORMATION	21/1154	90/20738	1.6117e-08	3.92853e-07	2.8908e-07	COL14A1/COL6A6/PCOLCE/COL8A1/COL3A1/COL15A1/COL6A3/LOXL1/LOX/COL5A1/COL1A2/P4HA3/COL1A1/COL4A2/PXDN/CTSL/COL5A2/COL12A1/ADAMTS2/COL10A1/MMP7	21
SENESE_HDAC1_TARGETS_DN	SENESE_HDAC1_TARGETS_DN	39/1154	262/20738	1.94737e-08	4.71569e-07	3.47003e-07	BNC2/SYNC/MYLK/TUBA1A/CNN1/EBF1/CDC42EP3/FSTL1/TNFRSF13C/TCF4/MRC2/KCNA1/COL3A1/LDLRAD4/CCSER2/FKBP7/GXYLT2/NFIA/SDC3/FOXS1/F2R/GLI2/SESN3/DKK3/MYBL1/NREP/COL5A1/DAB2/CRISPLD1/TRIM6/COL1A1/CYS1/NOX4/TGFB2/MYH10/GLIS2/TGFBI/COL12A1/LYPD1	39
SWEET_KRAS_TARGETS_UP	SWEET_KRAS_TARGETS_UP	20/1154	83/20738	1.96388e-08	4.7248e-07	3.47673e-07	CALD1/FLRT2/ATP2B4/WIPF1/IGFBP7/ADAM19/GLIPR1/SPOCK1/NPTX1/SPARC/MSC/DKK3/CCL2/COL5A1/SERPINE2/COL1A1/COL4A2/TGFB2/TGFBI/MATN2	20
NABA_PROTEOGLYCANS	NABA_PROTEOGLYCANS	13/1154	35/20738	2.14789e-08	5.13415e-07	3.77795e-07	PRG4/OGN/ASPN/KERA/LUM/OMD/BGN/SPOCK1/EPYC/VCAN/SPOCK2/SRGN/PODNL1	13
MIKKELSEN_ES_ICP_WITH_H3K4ME3_AND_H3K27ME3	MIKKELSEN_ES_ICP_WITH_H3K4ME3_AND_H3K27ME3	26/1154	136/20738	2.84712e-08	6.76192e-07	4.97574e-07	SGCD/IGF1/KCNN3/LYL1/RHOJ/TNFRSF13C/ADAMTS16/LAMA4/FGL2/CORO1A/TSPAN11/ISLR/PAX5/RGS8/LTA/COL1A2/GPNMB/ISLR2/CD44/LEFTY2/TFPI2/NOL4/BRINP3/CIITA/KCND2/IDO1	26
NABA_SECRETED_FACTORS	NABA_SECRETED_FACTORS	46/1154	343/20738	2.94256e-08	6.94407e-07	5.10977e-07	IGF1/FSTL1/FGF7/FGF1/CCL19/ANGPTL2/FRZB/VEGFC/SFRP2/ISM1/BRINP2/EBI3/TNFSF8/SFRP4/DHH/BMP3/CXCL13/LTA/CCL2/WNT9B/CCL21/CHRDL2/TNFSF13B/FGF5/TGFB1/LTB/LEFTY2/CCL13/IL12B/TGFB2/BRINP3/IL34/CCL26/CBLN4/CCL22/GDF5/CCL5/CCL17/IL5/EGFL6/IL6/XCL2/GDF3/MEGF10/TNFSF18/NRG3	46
KAYO_CALORIE_RESTRICTION_MUSCLE_UP	KAYO_CALORIE_RESTRICTION_MUSCLE_UP	21/1154	93/20738	2.98882e-08	7.0086e-07	5.15726e-07	RASSF2/FLNA/TUBA1A/EMP3/LUM/ELANE/COL3A1/IGFBP4/COL6A3/ENG/COL1A2/FAP/MAPT/FN1/CCR5/COL1A1/FAS/CCL13/MYH10/C1QB/CALB2	21
CHEN_ETV5_TARGETS_SERTOLI	CHEN_ETV5_TARGETS_SERTOLI	11/1154	25/20738	3.27056e-08	7.62103e-07	5.60792e-07	FCGR2B/ANGPTL2/ARSB/MS4A6A/CD53/IGFBP4/GPNMB/PLEK/C1QB/IL6/GCG	11
LINDSTEDT_DENDRITIC_CELL_MATURATION_D	LINDSTEDT_DENDRITIC_CELL_MATURATION_D	17/1154	63/20738	3.71344e-08	8.59894e-07	6.32751e-07	ARHGDIB/FGL2/RAB31/FCER2/CLEC2B/ACTN1/IFI16/LST1/DAB2/ITGB2/HLA-DMB/IGSF6/CCR1/TGFBI/CIITA/CCL22/ITGAM	17
REACTOME_G_ALPHA_Q_SIGNALLING_EVENTS	REACTOME_G_ALPHA_Q_SIGNALLING_EVENTS	34/1154	216/20738	3.89249e-08	8.95756e-07	6.5914e-07	HTR2A/GNG2/RGS13/GNB4/CYSLTR1/RGS4/TACR2/LPAR4/TACR1/GRPR/EDNRA/TAC1/DGKI/DGKG/GPR65/GNG13/UTS2B/P2RY10/RGS18/GNGT2/F2R/MLNR/PMCH/GPR132/RGS1/RGS19/CYSLTR2/HTR2B/AGT/RASGRP1/GNA14/XCL2/UTS2/GCG	34
DAVICIONI_TARGETS_OF_PAX_FOXO1_FUSIONS_UP	DAVICIONI_TARGETS_OF_PAX_FOXO1_FUSIONS_UP	38/1154	258/20738	3.93909e-08	9.00884e-07	6.62913e-07	BCHE/COL14A1/KCNN3/FAM49A/LTBP1/MSN/HEG1/EPHA3/NRP2/ADAM19/ST6GALNAC5/VEGFC/CHST11/DCX/ELK3/PRRX1/PAX5/CXCR4/PLXNC1/TIMP1/MMP16/COL5A1/MAGEL2/THEMIS2/CD44/SERPINE2/PCDH7/ARL4C/FZD1/MN1/SULF1/PXDN/PCDH17/NELL1/CAV2/CCND2/MYCN/DKK2	38
URS_ADIPOCYTE_DIFFERENTIATION_DN	URS_ADIPOCYTE_DIFFERENTIATION_DN	12/1154	31/20738	4.38252e-08	9.96149e-07	7.33014e-07	CD37/PTGDS/LUM/COL3A1/COL6A3/SPARC/LOXL1/LOX/FN1/COL4A2/THBS2/ADORA1	12
NABA_ECM_REGULATORS	NABA_ECM_REGULATORS	36/1154	238/20738	4.47544e-08	1.01107e-06	7.43992e-07	SERPINA9/ADAMTS16/A2M/ELANE/TIMP2/ADAM19/CTSO/CTSK/TGM4/HTRA1/MMP2/LOXL1/LOX/TIMP1/MMP16/SERPINA6/P4HA3/HTRA3/SERPINE2/SULF1/CTSL/PAPPA/CST6/MEP1B/CST4/CD109/AGT/CST2/CST5/ADAMTS2/CST7/CTSW/ADAM12/ADAMDEC1/TMPRSS15/MMP7	36
KEGG_ALLOGRAFT_REJECTION	KEGG_ALLOGRAFT_REJECTION	13/1154	37/20738	4.66942e-08	1.0485e-06	7.71534e-07	CD28/CD40LG/FAS/HLA-DQA2/IL12B/CD86/HLA-DMB/HLA-DPB1/HLA-DRA/HLA-DOA/IL5/HLA-DPA1/HLA-DQA1	13
HADDAD_T_LYMPHOCYTE_AND_NK_PROGENITOR_DN	HADDAD_T_LYMPHOCYTE_AND_NK_PROGENITOR_DN	17/1154	64/20738	4.79632e-08	1.0705e-06	7.87727e-07	LY86/NRXN2/LGALS1/SPON1/ELANE/RAB31/RNASE6/GPR183/MS4A6A/CCR7/SLC2A5/VCAN/TYROBP/LTB/PLEK/CCR9/CST7	17
HUANG_GATA2_TARGETS_UP	HUANG_GATA2_TARGETS_UP	27/1154	149/20738	5.0248e-08	1.11478e-06	8.2031e-07	DOK3/EMP3/FCGR2B/LPXN/PIK3CG/TESPA1/LGALS1/RAB31/LAT2/ST8SIA4/EVI2A/DGKG/GLIPR1/TNFAIP8L2/C1orf54/KCTD12/ALOX5AP/SPI1/MYO1F/TYROBP/SRGN/CD44/CD93/SELPLG/HP/SAMSN1/MNDA	27
TARTE_PLASMA_CELL_VS_PLASMABLAST_UP	TARTE_PLASMA_CELL_VS_PLASMABLAST_UP	50/1154	396/20738	5.32785e-08	1.17498e-06	8.64608e-07	COL14A1/KCNMA1/CD22/FSTL1/PTGDS/PCOLCE/MYBPC2/TNC/FBN1/CD72/ELANE/GPR18/FRZB/AEBP1/C4A/CCSER2/IGFBP4/VCAM1/TLR1/LTBP2/CR1/TCL1A/CCR7/ITGAD/ALOX5AP/MMP16/NREP/LST1/DAB2/GPNMB/COL1A1/CTSL/CD3D/HP/CHN1/HLA-DQB2/SPIB/FEV/CD3E/APOE/CCL22/APOC1/TRBV9/TIAM1/CALB2/CCR9/APOC2/RNASE3/HLA-DQA1/SLC10A2	50
HUANG_DASATINIB_RESISTANCE_UP	HUANG_DASATINIB_RESISTANCE_UP	19/1154	80/20738	5.69042e-08	1.24751e-06	9.17981e-07	CALD1/CDC42EP3/FSTL1/PARVA/MSN/PRNP/PPP1R18/MAP7D1/ELK3/KCTD12/RAC2/ANTXR2/COL5A1/IFI16/DPYD/PCDH7/DUSP10/TGFBI/CAV2	19
BERTUCCI_MEDULLARY_VS_DUCTAL_BREAST_CANCER_DN	BERTUCCI_MEDULLARY_VS_DUCTAL_BREAST_CANCER_DN	30/1154	179/20738	5.81948e-08	1.26831e-06	9.3328e-07	MYLK/CALD1/FLNA/FLNC/FSTL1/PARVA/ACTG2/PRICKLE1/THBS4/ZNF385D/RGS4/KATNAL1/EPHA3/COL8A1/FBXO32/CX3CR1/EDNRA/ACTN1/SRPX2/BGN/SPOCK1/PDE5A/PCDH18/FAP/MXRA8/AQP1/MYH10/NPR3/ZNF727/ADAM12	30
HOFFMANN_SMALL_PRE_BII_TO_IMMATURE_B_LYMPHOCYTE_UP	HOFFMANN_SMALL_PRE_BII_TO_IMMATURE_B_LYMPHOCYTE_UP	17/1154	65/20738	6.16074e-08	1.33483e-06	9.8223e-07	MEF2C/PLD4/CD22/MYH11/CNR2/MS4A1/LAT2/FCER2/GIMAP4/LTB/LEFTY2/CD83/HLA-DMB/CXCR5/CD74/CCND2/HLA-DQA1	17
REACTOME_RESPONSE_TO_ELEVATED_PLATELET_CYTOSOLIC_CA2	REACTOME_RESPONSE_TO_ELEVATED_PLATELET_CYTOSOLIC_CA2	25/1154	132/20738	6.35041e-08	1.36792e-06	1.00658e-06	IGF1/FLNA/PRKCB/A2M/SELP/VEGFC/TLN1/ACTN1/VCL/ISLR/ITGB3/LHFPL2/PECAM1/SPARC/TIMP1/TGFB1/SRGN/FN1/PCDH7/LEFTY2/PLEK/TGFB2/FERMT3/CD109/CTSW	25
WINTER_HYPOXIA_DN	WINTER_HYPOXIA_DN	15/1154	51/20738	6.65754e-08	1.42579e-06	1.04916e-06	LRMP/BCL2/ARHGAP15/CD79A/CCL19/NCKAP1L/TLR7/FRZB/EVI2A/PTPRC/IKZF1/EVI2B/CD48/CD28/INPP5D	15
CUI_TCF21_TARGETS_2_UP	CUI_TCF21_TARGETS_2_UP	52/1154	425/20738	8.1207e-08	1.72915e-06	1.27239e-06	CD79B/CCDC80/MGP/BNC2/GLI3/IGF1/PTGDS/CPXM1/LUM/LAMA4/LGI2/LGALS1/SPON1/NRP2/PENK/ARSB/EDNRA/GPC6/COL3A1/PRNP/CLEC11A/VCAM1/ISLR/GXYLT2/LHFPL2/NFIA/ANTXR1/AGTR2/MMP16/RELN/CYP7B1/VCAN/FAP/SIX2/CPNE5/FN1/COL1A1/GJA1/NFIX/POSTN/RCN3/SEMA3C/TGFBI/KCND3/TNFAIP6/CTHRC1/CD38/ADAMTS2/CCND2/MYCN/MATN2/CAPN6	52
REACTOME_SYNDECAN_INTERACTIONS	REACTOME_SYNDECAN_INTERACTIONS	11/1154	27/20738	8.62829e-08	1.81985e-06	1.33913e-06	TNC/COL3A1/ACTN1/ITGB3/SDC3/COL5A1/COL1A2/TGFB1/FN1/COL1A1/COL5A2	11
YU_MYC_TARGETS_DN	YU_MYC_TARGETS_DN	16/1154	59/20738	8.6449e-08	1.81985e-06	1.33913e-06	PLD4/PRKCB/CD37/MS4A1/SSPN/PTPRC/ABCA1/LTB/CD2/HLA-DMB/SPIB/SLFN12L/MNDA/CD74/GBP4/HLA-DQA1	16
KEGG_LEUKOCYTE_TRANSENDOTHELIAL_MIGRATION	KEGG_LEUKOCYTE_TRANSENDOTHELIAL_MIGRATION	23/1154	116/20738	8.81843e-08	1.84589e-06	1.35829e-06	PRKCB/MSN/PIK3CG/PLCG2/CTNNA3/THY1/VAV1/RHOH/PIK3CD/ACTN1/VCAM1/VCL/PECAM1/MMP2/RAC2/CXCR4/ITGA4/ITGAL/NCF1/ITGB2/CDH5/CYBB/ITGAM	23
WU_SILENCED_BY_METHYLATION_IN_BLADDER_CANCER	WU_SILENCED_BY_METHYLATION_IN_BLADDER_CANCER	15/1154	52/20738	8.87774e-08	1.84787e-06	1.35975e-06	IGF1/CNN1/MYH11/SCRG1/FGL2/CLIC2/CX3CR1/PTPRC/COL6A3/VCAN/ITGB2/PLEK/PXDN/COL5A2/ANPEP	15
KINSEY_TARGETS_OF_EWSR1_FLII_FUSION_DN	KINSEY_TARGETS_OF_EWSR1_FLII_FUSION_DN	44/1154	333/20738	9.0646e-08	1.87622e-06	1.38061e-06	CCDC80/MGP/MEF2C/RNF150/EBF1/FSTL1/PARVA/VIM/HMCN1/ZNF804A/A2M/LAMA4/IGFBP7/FRMD6/TNC/EPHA3/FBN1/ANGPTL2/TIMP2/CLEC2B/ZNF423/CDON/DOK5/COL3A1/VCL/NFIA/C1orf54/SPARC/LOX/COL5A1/DAB2/TSHZ1/GPNMB/PCDH18/MXRA8/FN1/COL1A1/FZD1/PRND/TGFB2/POSTN/COL5A2/TENM2/MLC1	44
WIERENGA_STAT5A_TARGETS_DN	WIERENGA_STAT5A_TARGETS_DN	31/1154	193/20738	9.59032e-08	1.97401e-06	1.45257e-06	GAPT/FCER1A/MYLK/PLXDC2/DOK3/PLCG2/CORO1A/SELP/TLN1/ACTN1/SPX/LDLRAD4/ETS1/BANK1/LHFPL2/VASH1/PECAM1/SLC24A3/RGS18/TREML1/CXCR4/CD84/IFI16/LST1/PLEK/CD93/STX11/CD14/GP1BA/FERMT3/CD96	31
KHETCHOUMIAN_TRIM24_TARGETS_UP	KHETCHOUMIAN_TRIM24_TARGETS_UP	14/1154	46/20738	1.13149e-07	2.30339e-06	1.69495e-06	VIM/LGALS1/LAPTM5/VCAM1/SPARC/COL1A2/ITGAL/TGFB1/CD44/COL1A1/CYBB/COL4A2/SPP1/CD38	14
PID_SYNDECAN_1_PATHWAY	PID_SYNDECAN_1_PATHWAY	14/1154	46/20738	1.13149e-07	2.30339e-06	1.69495e-06	COL14A1/COL8A1/COL3A1/COL15A1/COL6A3/COL5A1/COL1A2/TGFB1/COL1A1/COL5A2/COL12A1/CCL5/COL10A1/MMP7	14
BRUECKNER_TARGETS_OF_MIRLET7A3_DN	BRUECKNER_TARGETS_OF_MIRLET7A3_DN	18/1154	76/20738	1.32564e-07	2.68389e-06	1.97493e-06	CALD1/DPYSL3/VIM/NRP2/NXPE3/DIO2/SPOCK1/SPARC/COL5A1/PCED1B/FN1/COL4A2/CTSL/TGFB2/FAM83D/CD70/MATN2/ADGRE3	18
KANG_IMMORTALIZED_BY_TERT_DN	KANG_IMMORTALIZED_BY_TERT_DN	21/1154	101/20738	1.36107e-07	2.74062e-06	2.01668e-06	OGN/THBS4/CD52/ABCC9/A2M/GPR88/ADAM19/MAFB/ALDH1A3/CXCR4/SPN/CCL2/NRP1/CD44/PPP2R2B/TFPI2/TYRP1/THBS2/HTR2B/EGR3/GRM7	21
LI_INDUCED_T_TO_NATURAL_KILLER_UP	LI_INDUCED_T_TO_NATURAL_KILLER_UP	42/1154	316/20738	1.50263e-07	3.00932e-06	2.2144e-06	GNG2/CD52/VIM/HVCN1/PLCG2/LGALS1/GPR18/LAT2/SCIMP/ARSB/GPR34/CX3CR1/EVI2A/MYO1G/GLIPR1/GVINP1/VASH1/LRRC8C/SLC24A3/ITGAD/F2R/LTA/MYO1F/TYROBP/CCR5/SERPINE2/RGS1/STX11/DOK2/CTSL/HAVCR2/CXCR5/CCL5/CXCR3/TIAM1/SPP1/CLNK/CCND2/KIR3DL1/CTSW/EGR3/NKG7	42
HESS_TARGETS_OF_HOXA9_AND_MEIS1_DN	HESS_TARGETS_OF_HOXA9_AND_MEIS1_DN	19/1154	85/20738	1.60202e-07	3.19112e-06	2.34818e-06	MPEG1/MS4A6A/MSR1/C5AR1/DAB2/VCAN/MYADM/C3AR1/CSF2RB/CCR5/PLEK/CYBB/TGFBI/SLFN12L/MRC1/FPR1/LILRB4/FCGR1A/RNASE3	19
REACTOME_INTERLEUKIN_4_AND_INTERLEUKIN_13_SIGNALING	REACTOME_INTERLEUKIN_4_AND_INTERLEUKIN_13_SIGNALING	22/1154	111/20738	1.68548e-07	3.33942e-06	2.4573e-06	ZEB1/BCL2/VIM/FCER2/VCAM1/MMP2/GATA3/CCL2/TIMP1/COL1A2/TGFB1/JAK3/FN1/ITGB2/IL12B/JAK2/CCL22/IGHG4/TWIST1/SOCS1/ITGAM/IL6	22
KEGG_GRAFT_VERSUS_HOST_DISEASE	KEGG_GRAFT_VERSUS_HOST_DISEASE	13/1154	41/20738	1.87486e-07	3.69488e-06	2.71887e-06	CD28/FAS/HLA-DQA2/CD86/HLA-DMB/HLA-DPB1/HLA-DRA/HLA-DOA/KIR3DL2/IL6/HLA-DPA1/KIR3DL1/HLA-DQA1	13
KEGG_VIRAL_MYOCARDITIS	KEGG_VIRAL_MYOCARDITIS	17/1154	70/20738	1.99536e-07	3.89679e-06	2.86745e-06	SGCD/MYH11/CD28/SGCB/RAC2/CD40LG/ITGAL/ITGB2/HLA-DQA2/CD86/HLA-DMB/MYH10/HLA-DPB1/HLA-DRA/HLA-DOA/HLA-DPA1/HLA-DQA1	17
SMIRNOV_CIRCULATING_ENDOTHELIOCYTES_IN_CANCER_UP	SMIRNOV_CIRCULATING_ENDOTHELIOCYTES_IN_CANCER_UP	27/1154	159/20738	2.00887e-07	3.89679e-06	2.86745e-06	MYLK/TIMP2/RAB33A/ADAP2/ABCA1/SPARC/C5AR1/DKK3/ENG/IL21R/C3AR1/TGFB1/RGS1/CD93/BCAT1/CTSL/CD14/FCGR2A/BST1/CHN1/CCR1/TGFBI/RNASE2/FPR1/CSF2RA/TLR8/ANPEP	27
TONKS_TARGETS_OF_RUNX1_RUNX1T1_FUSION_ERYTHROCYTE_UP	TONKS_TARGETS_OF_RUNX1_RUNX1T1_FUSION_ERYTHROCYTE_UP	27/1154	159/20738	2.00887e-07	3.89679e-06	2.86745e-06	CD79B/ELANE/TLR7/CD180/CXorf21/CD200/SCG5/LAIR1/COL1A2/IFI16/LILRA1/SLC2A5/VCAN/GPNMB/C3AR1/TFPI2/SLC15A3/PXDN/LILRB1/CTSL/ALDH1A2/RASGRP1/TIAM1/OLR1/FCGR1A/DKK2/UCHL1	27
WONG_ENDMETRIUM_CANCER_DN	WONG_ENDMETRIUM_CANCER_DN	18/1154	78/20738	2.02324e-07	3.90423e-06	2.87292e-06	OGN/FLRT2/ECM2/GLT8D2/FBN1/FBXO32/HIC1/COL3A1/EHD2/SFRP4/VGLL3/SLC24A3/CD248/LILRB1/ALDH1A2/PAPPA/WT1/CTSW	18
PID_INTEGRIN2_PATHWAY	PID_INTEGRIN2_PATHWAY	11/1154	29/20738	2.06524e-07	3.96462e-06	2.91735e-06	THY1/VCAM1/ITGAD/CD40LG/ITGAL/ITGB2/C3/FCGR2A/GP1BA/TGFBI/ITGAM	11
KEGG_PRIMARY_IMMUNODEFICIENCY	KEGG_PRIMARY_IMMUNODEFICIENCY	12/1154	35/20738	2.10581e-07	4.02166e-06	2.95933e-06	TNFRSF13C/CD19/CD79A/PTPRC/CD40LG/CD4/JAK3/CD3D/AICDA/CD3E/CIITA/LCK	12
KONDO_EZH2_TARGETS	KONDO_EZH2_TARGETS	34/1154	232/20738	2.28055e-07	4.33304e-06	3.18846e-06	MYLK/KCNMA1/ZEB1/WWTR1/CAP2/MS4A1/MAB21L2/SHISA3/SSPN/CSGALNACT2/TACR1/ELMO1/COL8A1/GPC6/COL3A1/ITGBL1/SPOCK1/SPARC/SLAMF6/ANTXR2/NRP1/CRISPLD1/COL1A1/SIGLEC5/GJA1/LILRB1/TYRP1/IL9R/TNFAIP6/TMSB15A/MYO16/GNA14/CYP19A1/UTS2	34
KLEIN_TARGETS_OF_BCR_ABL1_FUSION	KLEIN_TARGETS_OF_BCR_ABL1_FUSION	13/1154	42/20738	2.57751e-07	4.84754e-06	3.56705e-06	EBF1/CD19/CD79A/PTPRC/IKZF1/PAX5/CXCR4/ITGAL/SIGLEC8/SPIB/MNDA/CD38/ANPEP	13
ZHAN_MULTIPLE_MYELOMA_DN	ZHAN_MULTIPLE_MYELOMA_DN	13/1154	42/20738	2.57751e-07	4.84754e-06	3.56705e-06	A2M/CD72/ELANE/RNASE6/CD27/VCAM1/AIF1/COL1A2/LST1/ITGB2/MRC1/APOE/APOC1	13
KEGG_ASTHMA	KEGG_ASTHMA	11/1154	30/20738	3.09711e-07	5.78485e-06	4.25677e-06	FCER1A/CD40LG/HLA-DQA2/HLA-DMB/HLA-DPB1/HLA-DRA/HLA-DOA/IL5/HLA-DPA1/RNASE3/HLA-DQA1	11
GAUSSMANN_MLL_AF4_FUSION_TARGETS_E_UP	GAUSSMANN_MLL_AF4_FUSION_TARGETS_E_UP	20/1154	97/20738	3.10711e-07	5.78485e-06	4.25677e-06	ASPN/CDH11/SFRP2/SORCS2/CLEC11A/ABCA1/ISLR/PDGFRL/KCTD12/GAL3ST4/PCDHB4/NREP/CYP7B1/SULF1/POSTN/HDAC9/TGFBI/CCL5/CTHRC1/EGR3	20
HELLER_HDAC_TARGETS_SILENCED_BY_METHYLATION_DN	HELLER_HDAC_TARGETS_SILENCED_BY_METHYLATION_DN	38/1154	280/20738	3.41736e-07	6.33066e-06	4.6584e-06	CD79B/KCNN3/LSAMP/LRMP/WIPF1/BCL2/ZNF804A/MAP4K1/MBNL1/TCF4/CLIC2/LAPTM5/CLEC2B/CD180/LIMD2/PTPRC/FMNL1/EHD3/CD48/DOCK10/CD28/LY96/IFI16/ITGA4/IL21R/SH2D1A/FAS/SULF1/GJA1/PXDN/SELPLG/CBR3/CCR1/CHST15/OLR1/CCND2/MYCN/TMPRSS15	38
FERRANDO_T_ALL_WITH_MLL_ENL_FUSION_UP	FERRANDO_T_ALL_WITH_MLL_ENL_FUSION_UP	19/1154	89/20738	3.45099e-07	6.36116e-06	4.68085e-06	FLNA/TUBA1A/VIM/WAS/TCF4/LAPTM5/CX3CR1/CLEC2B/AEBP1/IKZF1/GPSM3/SELL/GATA3/SPOCK2/PXDN/CD3E/TIAM1/CCR9/CHI3L2	19
STEGER_ADIPOGENESIS_DN	STEGER_ADIPOGENESIS_DN	10/1154	25/20738	4.15323e-07	7.61768e-06	5.60545e-06	OGN/FSTL1/TIMP2/MMP2/CMTM3/LOX/CD44/POSTN/THBS2/CAPN6	10
RUTELLA_RESPONSE_TO_HGF_DN	RUTELLA_RESPONSE_TO_HGF_DN	34/1154	238/20738	4.20934e-07	7.65451e-06	5.63256e-06	MEF2C/FCER1A/LY86/PRKCB/LRMP/LPP/CD52/MAP4K1/IGFBP7/ADAM19/CX3CR1/MS4A6A/CD48/SELL/MAFB/MS4A4A/SPOCK1/PECAM1/AIF1/NOTCH2/C5AR1/CXCR4/NREP/ITGA4/VCAN/ITGAL/CD83/AOAH/CD86/CD14/HDAC9/FPR1/NLRP3/HLA-DQA1	34
NAKAMURA_ADIPOGENESIS_EARLY_DN	NAKAMURA_ADIPOGENESIS_EARLY_DN	12/1154	37/20738	4.21463e-07	7.65451e-06	5.63256e-06	CALD1/ACTG2/MYH11/RGS4/GLIPR1/VCAM1/COL15A1/LOX/DAB2/SERPINE2/POSTN/THBS2	12
PID_AVB3_INTEGRIN_PATHWAY	PID_AVB3_INTEGRIN_PATHWAY	17/1154	74/20738	4.70637e-07	8.41668e-06	6.1934e-06	COL14A1/COL8A1/ADGRA2/TLN1/COL3A1/VCL/COL15A1/ITGB3/COL6A3/COL5A1/COL1A2/FN1/COL1A1/COL5A2/COL12A1/SPP1/COL10A1	17
NABA_COLLAGENS	NABA_COLLAGENS	13/1154	44/20738	4.72515e-07	8.41668e-06	6.1934e-06	COL14A1/COL6A6/COL8A1/COL3A1/COL15A1/COL6A3/COL5A1/COL1A2/COL1A1/COL4A2/COL5A2/COL12A1/COL10A1	13
REACTOME_COLLAGEN_CHAIN_TRIMERIZATION	REACTOME_COLLAGEN_CHAIN_TRIMERIZATION	13/1154	44/20738	4.72515e-07	8.41668e-06	6.1934e-06	COL14A1/COL6A6/COL8A1/COL3A1/COL15A1/COL6A3/COL5A1/COL1A2/COL1A1/COL4A2/COL5A2/COL12A1/COL10A1	13
VANHARANTA_UTERINE_FIBROID_UP	VANHARANTA_UTERINE_FIBROID_UP	13/1154	44/20738	4.72515e-07	8.41668e-06	6.1934e-06	PRKCB/EDNRA/COL3A1/LTBP2/FN1/COL1A1/COL4A2/SULF1/ART4/TRPS1/COL5A2/HTR2B/TMSB15A	13
HOELZEL_NF1_TARGETS_DN	HOELZEL_NF1_TARGETS_DN	22/1154	118/20738	5.13527e-07	9.10343e-06	6.69874e-06	FSTL1/PRICKLE1/HMCN1/FAM124A/RNF165/ST6GALNAC5/ZNF423/COL3A1/CD200/LDLRAD4/BGN/GATA3/MMP16/NREP/PCDH18/FN1/CAMK1D/LIX1/HDAC9/FREM1/MATN2/GRM7	22
REACTOME_COLLAGEN_BIOSYNTHESIS_AND_MODIFYING_ENZYMES	REACTOME_COLLAGEN_BIOSYNTHESIS_AND_MODIFYING_ENZYMES	16/1154	67/20738	5.81172e-07	1.02535e-05	7.54504e-06	COL14A1/COL6A6/PCOLCE/COL8A1/COL3A1/COL15A1/COL6A3/COL5A1/COL1A2/P4HA3/COL1A1/COL4A2/COL5A2/COL12A1/ADAMTS2/COL10A1	16
CHIANG_LIVER_CANCER_SUBCLASS_INTERFERON_UP	CHIANG_LIVER_CANCER_SUBCLASS_INTERFERON_UP	10/1154	26/20738	6.41251e-07	1.12068e-05	8.24647e-06	FCGR2B/EVI2A/GPR65/MS4A4A/ALOX5AP/MOXD1/KLRB1/CALCRL/KMO/FCGR3A	10
FINAK_BREAST_CANCER_SDPP_SIGNATURE	FINAK_BREAST_CANCER_SDPP_SIGNATURE	10/1154	26/20738	6.41251e-07	1.12068e-05	8.24647e-06	OGN/MIR99AHG/CD52/FRZB/LCP1/ITGBL1/CD48/TRBV5-4/PLEK/SPP1	10
VALK_AML_CLUSTER_5	VALK_AML_CLUSTER_5	11/1154	32/20738	6.59906e-07	1.14786e-05	8.44653e-06	MAFB/EPB41L3/LILRA1/VCAN/SLC15A3/LILRB1/CD86/SIGLEC7/CCR1/PILRA/TLR8	11
CHICAS_RB1_TARGETS_GROWING	CHICAS_RB1_TARGETS_GROWING	34/1154	243/20738	6.88183e-07	1.19146e-05	8.76731e-06	CCDC80/BNC2/MYLK/KCNMA1/LSAMP/DPYSL3/PRICKLE1/AXL/FGF1/RGS4/LUM/PCOLCE/NRXN3/GPC6/COL3A1/S1PR3/DOCK10/LTBP2/BGN/NREP/IFI16/NRP1/FAP/VAT1L/ZFHX4-AS1/LXN/PCDH7/SULF1/POSTN/ADAMTS2/TMSB15A/MATN2/ANPEP/LRRC15	34
GAVIN_FOXP3_TARGETS_CLUSTER_P2	GAVIN_FOXP3_TARGETS_CLUSTER_P2	17/1154	76/20738	7.05467e-07	1.2157e-05	8.9457e-06	CD22/PRICKLE1/BCL2/IGFBP7/NCKAP1L/TM6SF1/BICC1/ARSB/TNFSF8/C3orf70/ITGA4/GJA1/CXCR5/LCK/CHST15/CCL5/CXCR3	17
MARTORIATI_MDM4_TARGETS_NEUROEPITHELIUM_DN	MARTORIATI_MDM4_TARGETS_NEUROEPITHELIUM_DN	26/1154	160/20738	8.09252e-07	1.38809e-05	1.02142e-05	LY86/SYT11/RGS4/BHLHE22/CORO1A/CX3CR1/ST8SIA4/CD53/SCG5/DCX/ABCD2/VCAM1/CXCL13/LST1/CSF2RB/PKIA/TYROBP/RTN1/NOL4/ELAVL4/EOMES/HDAC9/MRC1/C1QB/SOGA3/EGFL6	26
ACEVEDO_LIVER_CANCER_WITH_H3K27ME3_UP	ACEVEDO_LIVER_CANCER_WITH_H3K27ME3_UP	38/1154	290/20738	8.32122e-07	1.42074e-05	1.04545e-05	MGP/GAPT/CALD1/MIR99AHG/ARHGDIB/PIK3CG/SELP/CTNNA3/RNASE6/COL3A1/PRNP/IKZF1/LRRC8C/PRTG/AGTR2/DOCK8/COL1A2/FZD1/SULF1/HAVCR2/SEMA3C/PTENP1/THEMIS/CSRNP3/CHST2/GSDMC/TLR8/GADL1/TMSB15A/CCR9/IL6/AIM2/ENTHD1/GDF3/CRB1/TENM3/GPR1/GCG	38
WIERENGA_STAT5A_TARGETS_UP	WIERENGA_STAT5A_TARGETS_UP	30/1154	202/20738	8.66944e-07	1.47341e-05	1.0842e-05	MAP1A/GNG2/STAP1/CPXM1/NCS1/FCER2/GPR65/IGFBP4/ABCA1/CCR7/CCL2/ANTXR2/CD40LG/DAB2/LTB/CD83/RGS1/FPR3/CERCAM/FCGR2A/SAMSN1/CCL22/CCL5/OLR1/CALB2/SPP1/GBP4/EGFL6/CST7/CCND2	30
POMEROY_MEDULLOBLASTOMA_DESMOPLASIC_VS_CLASSIC_DN	POMEROY_MEDULLOBLASTOMA_DESMOPLASIC_VS_CLASSIC_DN	15/1154	61/20738	8.71463e-07	1.47432e-05	1.08488e-05	MGP/BCL2/TCF4/COL3A1/SCG5/LTBP2/ALDH1A3/CXCR4/COL1A2/VCAN/COL1A1/ELAVL4/TMSB15A/MYCN/UCHL1	15
WESTON_VEGFA_TARGETS_6HR	WESTON_VEGFA_TARGETS_6HR	14/1154	54/20738	1.00764e-06	1.68928e-05	1.24305e-05	MGP/THY1/BGN/COL6A3/MMP2/CCL2/COL5A1/COL1A2/VCAN/FAP/TFPI2/ART4/POSTN/HTR2B	14
WIERENGA_STAT5A_TARGETS_GROUP2	WIERENGA_STAT5A_TARGETS_GROUP2	14/1154	54/20738	1.00764e-06	1.68928e-05	1.24305e-05	STAP1/GPR65/ABCA1/CCR7/CCL2/ANTXR2/CD83/RGS1/FPR3/CCL22/CCL5/OLR1/SPP1/EGFL6	14
ONO_AML1_TARGETS_DN	ONO_AML1_TARGETS_DN	12/1154	40/20738	1.08821e-06	1.81245e-05	1.33369e-05	TNFSF8/SELL/IGFBP4/CCR7/SLAMF6/CXCR4/CD84/CCR5/SLFN12L/IL21/CCL5/CXCR3	12
HOSHIDA_LIVER_CANCER_LATE_RECURRENCE_UP	HOSHIDA_LIVER_CANCER_LATE_RECURRENCE_UP	15/1154	62/20738	1.0909e-06	1.81245e-05	1.33369e-05	POU2F2/SLC8A1/CPXM1/LUM/FGL2/TCF4/FRZB/ITGBL1/CD48/CTSK/AOAH/CD3D/RASGRP1/CD74/NKG7	15
YAGI_AML_FAB_MARKERS	YAGI_AML_FAB_MARKERS	29/1154	194/20738	1.14595e-06	1.89542e-05	1.39474e-05	LY86/BAG2/LGALS1/TIMP2/DOK5/EVI2A/CD180/CD200/LCP1/LDLRAD4/VCL/LAIR1/AP1S2/ITGB3/F2R/AIF1/STAC/CSF2RB/PKIA/SERPINE2/AOAH/TRBC2/GP1BA/MYH10/NLRP3/TMSB15A/MYO16/CTSW/KEL	29
PLASARI_TGFB1_TARGETS_10HR_UP	PLASARI_TGFB1_TARGETS_10HR_UP	29/1154	195/20738	1.27591e-06	2.101e-05	1.54602e-05	PRG4/CNN1/THBS4/TNC/FBXO32/LMO1/CHST11/HIVEP3/TSPAN2/ITGB3/LRRC8C/FOXS1/HEYL/ALDH1A3/NFATC1/TGFB1/MICAL2/CMKLR1/TFPI2/ALDH1A2/SEMA7A/HTR2B/OLR1/CCL17/IL6/FOXC2/ADAM12/FXYD6-FXYD2/MEGF10	29
PETRETTO_CARDIAC_HYPERTROPHY	PETRETTO_CARDIAC_HYPERTROPHY	11/1154	34/20738	1.32015e-06	2.16423e-05	1.59254e-05	PDLIM3/OGN/TUBA1A/FSTL1/ASPN/FBN1/LOXL1/CRIM1/CD44/FN1/COL5A2	11
TORCHIA_TARGETS_OF_EWSR1_FLI1_FUSION_DN	TORCHIA_TARGETS_OF_EWSR1_FLI1_FUSION_DN	40/1154	319/20738	1.34857e-06	2.20108e-05	1.61966e-05	MEF2C/IL31RA/MOB3A/CDC42EP3/WIPF1/STAP1/LTBP1/ARHGAP15/VIM/ATP8B4/NCKAP1L/LGALS1/TM6SF1/PTPRCAP/CXorf21/LIMD2/CD27/KLHL5/PTPRC/LCP1/ARHGAP30/SELL/IGFBP4/DOCK10/ITGB3/LHFPL2/PDE5A/KCTD12/RGS18/PLXNC1/LST1/ITGAL/PDE4B/TYROBP/RGS19/SELPLG/SYDE2/MNDA/MYCN/NKG7	40
BIOCARTA_LAIR_PATHWAY	BIOCARTA_LAIR_PATHWAY	8/1154	17/20738	1.38954e-06	2.258e-05	1.66154e-05	SELP/VCAM1/ITGA4/ITGAL/ITGB2/C3/SELPLG/IL6	8
SHIN_B_CELL_LYMPHOMA_CLUSTER_3	SHIN_B_CELL_LYMPHOMA_CLUSTER_3	10/1154	28/20738	1.43033e-06	2.31414e-05	1.70285e-05	LRMP/BCL2/CXCL13/NFATC1/TGFB1/LTB/FZD1/CD86/LCK/JAK2	10
MATSUDA_NATURAL_KILLER_DIFFERENTIATION	MATSUDA_NATURAL_KILLER_DIFFERENTIATION	53/1154	479/20738	1.47383e-06	2.37415e-05	1.74701e-05	MEF2C/IGF1/FLNA/LY86/EBF1/FSTL1/ASPN/MDFIC/WIPF1/WWTR1/FGL2/TCF4/CORO1A/SPON1/EPHA3/TM6SF1/MPEG1/GPR34/SFRP2/MS4A6A/LIMD2/EBF2/SLC25A53/IGFBP4/MS4A4A/KCTD12/SGCB/PRRX1/CCR7/F2R/CRIM1/ENG/EPB41L3/MYADM/MYO1F/KLRB1/CD44/CCR5/RGS1/BNC1/POSTN/CCR1/PLA2G2D/CIITA/CCL5/CXCR3/LILRB4/PDCD1/CD38/CLNK/CCR9/MYCN/NKG7	53
CHARAFE_BREAST_CANCER_LUMINAL_VS_BASAL_DN	CHARAFE_BREAST_CANCER_LUMINAL_VS_BASAL_DN	51/1154	454/20738	1.4871e-06	2.38515e-05	1.75511e-05	CCDC80/CALD1/CDC42EP3/FSTL1/MDFIC/EMP3/AXL/MIR100HG/MSN/WWTR1/ITGA1/IGFBP7/FRMD6/MBNL1/COL8A1/BICC1/TBC1D1/GJC1/PRNP/PIK3CD/ACTN1/SPX/GLIPR1/ETS1/SRPX2/ELK3/HTRA1/RGL1/RAC2/ALDH1A3/ANTXR1/LOX/GPX8/IFI16/NRP1/FAP/CD44/DPYD/SERPINE2/COL4A2/FAS/C3/CD14/BNC1/CCDC88A/TGFBI/FAM83D/ARHGAP23/CD109/IRX1/CAV2	51
OISHI_CHOLANGIOMA_STEM_CELL_LIKE_DN	OISHI_CHOLANGIOMA_STEM_CELL_LIKE_DN	36/1154	275/20738	1.64365e-06	2.62487e-05	1.93151e-05	PDLIM3/BNC2/PTGIS/EMP3/FBN1/NRP2/RAB31/ANGPTL2/CLEC2B/ADGRA2/AEBP1/VEGFC/CACNA2D1/COL3A1/VCAM1/BGN/ELK3/CR1/MSC/DKK3/TIMP1/COL5A1/MOXD1/SLC2A5/FAP/MXRA8/STX11/RRAS/RCN3/COL5A2/BST1/SEMA7A/THBS2/LCK/ADAMTS2/SEMA3A	36
REACTOME_SEMAPHORIN_INTERACTIONS	REACTOME_SEMAPHORIN_INTERACTIONS	15/1154	64/20738	1.68409e-06	2.67792e-05	1.97054e-05	DPYSL3/MYH11/ITGA1/PLXNA4/CD72/TLN1/PTPRC/PLXNC1/NRP1/TYROBP/TREM2/RRAS/SEMA7A/MYH10/SEMA3A	15
FLORIO_NEOCORTEX_BASAL_RADIAL_GLIA_UP	FLORIO_NEOCORTEX_BASAL_RADIAL_GLIA_UP	45/1154	382/20738	1.71458e-06	2.71475e-05	1.99764e-05	SGCD/BNC2/EBF1/CD22/OLFML1/LRMP/WWTR1/ABCC9/PLXNA4/TESPA1/MBNL1/EPHA3/COL8A1/PENK/SCIMP/PDE3A/RHOH/TIMD4/ITGBL1/SELL/LAIR1/ETS1/PYHIN1/ANKRD55/SPN/LINC01550/NRP1/TMEM236/PCDH18/FGF5/EOMES/BNC1/CYSLTR2/AICDA/FAM83D/LAX1/FCRL4/SLFN12L/CD96/GDF5/GADL1/GPC5/CLNK/CRB1/TM4SF19	45
ONO_FOXP3_TARGETS_DN	ONO_FOXP3_TARGETS_DN	12/1154	42/20738	1.94219e-06	3.06204e-05	2.2532e-05	BCL2/TNFSF8/SELL/IGFBP4/SLAMF6/CXCR4/CD84/HAVCR2/EOMES/SLFN12L/IL21/CCL5	12
HOSHIDA_LIVER_CANCER_SURVIVAL_UP	HOSHIDA_LIVER_CANCER_SURVIVAL_UP	16/1154	73/20738	1.98893e-06	3.10928e-05	2.28795e-05	FILIP1L/WIPF1/LPP/BCL2/CCL19/TCF4/FBN1/FMO1/AEBP1/CD48/COL6A3/CXCR4/CCL21/DAB2/HDAC9/MMP7	16
RAMALHO_STEMNESS_DN	RAMALHO_STEMNESS_DN	16/1154	73/20738	1.98893e-06	3.10928e-05	2.28795e-05	NHSL2/LY86/PLD4/PRKCB/CORO1A/MPEG1/LAT2/EVI2A/PTPRC/CD53/RELN/NRP1/TYROBP/ITGB2/SLFN12L/LILRB4	16
PID_TCR_PATHWAY	PID_TCR_PATHWAY	15/1154	65/20738	2.07762e-06	3.23428e-05	2.37994e-05	FLNA/PRKCB/MAP4K1/WAS/VAV1/PTPRC/CD28/CD4/CD3G/CD86/CD3D/CD3E/LCK/HLA-DRA/RASGRP1	15
SENGUPTA_NASOPHARYNGEAL_CARCINOMA_UP	SENGUPTA_NASOPHARYNGEAL_CARCINOMA_UP	38/1154	301/20738	2.08685e-06	3.23506e-05	2.38051e-05	CALD1/KCNMA1/FBN1/COL8A1/CDH11/THY1/COL3A1/PRNP/CD200/COL15A1/ROBO1/PRRX1/SPARC/CCL2/COL5A1/COL1A2/VCAN/LINC01094/FN1/COL1A1/COL4A2/FAS/SULF1/GJA1/TFEC/CD14/HAVCR2/FCGR2A/POSTN/COL5A2/CHN1/IGSF6/CD274/APOC1/TNFAIP6/SOCS1/ADAMTS2/FCGR1A	38
CHANDRAN_METASTASIS_DN	CHANDRAN_METASTASIS_DN	39/1154	313/20738	2.13123e-06	3.29008e-05	2.421e-05	MYLK/GLI3/OGN/PPP1R12B/RNF150/RAB23/LSAMP/THBS4/MIR100HG/SSPN/FGL2/EPHA3/CACNA2D1/CTSO/SLMAP/TSPAN2/PDE5A/NFIA/FHOD3/PRRX1/RAMP2/AHNAK2/ANTXR2/MOXD1/ITGA4/PDE4B/PCDH18/GPX7/PCDH7/MN1/RRAS/PI15/SEMA3C/GLIS2/CD38/TMSB15A/CAV2/EGR3/NDNF	39
ODONNELL_TARGETS_OF_MYC_AND_TFRC_UP	ODONNELL_TARGETS_OF_MYC_AND_TFRC_UP	17/1154	82/20738	2.18006e-06	3.3515e-05	2.46619e-05	CD37/TMEM156/CD72/FCMR/MPEG1/CX3CR1/MYO1G/CD27/GLIPR1/PYHIN1/PDE4B/CD44/RGS1/FCRL4/ITGAM/HLA-DQA1/GRM7	17
ZHU_CMV_ALL_DN	ZHU_CMV_ALL_DN	21/1154	119/20738	2.34773e-06	3.59435e-05	2.6449e-05	MYLK/FLNA/FGF7/PTGIS/BCL2/LAMA4/ZNF521/CDH11/COL3A1/LOX/ENG/COL1A2/VCAN/COL1A1/MN1/POSTN/COL5A2/CHN1/THBS2/APOE/ANPEP	21
HERNANDEZ_ABERRANT_MITOSIS_BY_DOCETACEL_2NM_UP	HERNANDEZ_ABERRANT_MITOSIS_BY_DOCETACEL_2NM_UP	16/1154	74/20738	2.40777e-06	3.6711e-05	2.70137e-05	BNC2/FILIP1L/ARHGDIB/RAB31/TIMP2/CHST11/LCP1/COL5A1/IFI16/SH2D1A/TYRP1/CD3D/THBS2/FOLH1/AGT/RASGRF1	16
KEGG_SYSTEMIC_LUPUS_ERYTHEMATOSUS	KEGG_SYSTEMIC_LUPUS_ERYTHEMATOSUS	23/1154	139/20738	2.50021e-06	3.79643e-05	2.79359e-05	FCGR2B/ELANE/C4A/ACTN1/C4B/CD28/GRIN2A/CD40LG/C3/HLA-DQA2/CD86/FCGR2A/HLA-DMB/C1QA/C1QC/C1QB/HLA-DPB1/FCGR3A/HLA-DRA/HLA-DOA/FCGR1A/HLA-DPA1/HLA-DQA1	23
KEGG_TYPE_I_DIABETES_MELLITUS	KEGG_TYPE_I_DIABETES_MELLITUS	12/1154	43/20738	2.55825e-06	3.85297e-05	2.8352e-05	CD28/LTA/FAS/HLA-DQA2/IL12B/CD86/HLA-DMB/HLA-DPB1/HLA-DRA/HLA-DOA/HLA-DPA1/HLA-DQA1	12
PID_INTEGRIN3_PATHWAY	PID_INTEGRIN3_PATHWAY	12/1154	43/20738	2.55825e-06	3.85297e-05	2.8352e-05	LAMA4/TNC/FBN1/THY1/ITGB3/PECAM1/COL1A2/PDGFRB/FN1/COL1A1/TGFBI/SPP1	12
NABA_ECM_AFFILIATED	NABA_ECM_AFFILIATED	26/1154	170/20738	2.62122e-06	3.93183e-05	2.89323e-05	CLEC17A/PLXDC2/PLXNA4/LGALS1/GREM1/CLEC2B/GPC6/CLEC11A/CLEC9A/SDC3/PLXNC1/CLEC4C/C1QTNF5/SEMA6B/SEMA3C/SEMA7A/C1QA/C1QC/FREM1/MUC16/C1QB/CD209/GPC5/SEMA3A/REG1B/CLC	26
KEGG_REGULATION_OF_ACTIN_CYTOSKELETON	KEGG_REGULATION_OF_ACTIN_CYTOSKELETON	30/1154	213/20738	2.66776e-06	3.9855e-05	2.93272e-05	MYLK/FGF7/FGF1/MSN/PIP4K2A/WAS/ITGA1/PIK3CG/NCKAP1L/PPP1R12A/VAV1/PIK3CD/ACTN1/VCL/ITGB3/ITGAD/F2R/RAC2/ITGA4/ITGAL/FGF5/PDGFRB/FN1/ITGB2/RRAS/CD14/MYH10/ITGA11/TIAM1/ITGAM	30
RUTELLA_RESPONSE_TO_CSF2RB_AND_IL4_UP	RUTELLA_RESPONSE_TO_CSF2RB_AND_IL4_UP	41/1154	340/20738	2.72562e-06	4.05218e-05	2.98178e-05	FCER1A/RFTN1/KCNMA1/FILIP1L/LPP/CCL19/PPP1R12A/CLIC2/ADAM19/CD1E/RAB8B/CCSER2/EBI3/LTBP2/LHFPL2/ROBO1/ARHGAP22/MMP2/CCR7/RGL1/CRIM1/CXCR4/CD84/NRP1/IL21R/GPNMB/LXN/CD83/CCL13/CD86/KMO/APOE/CD209/CCL22/APOC1/CSF2RA/TNFAIP6/CCL17/SPP1/ADAM12/ADAMDEC1	41
GAVIN_FOXP3_TARGETS_CLUSTER_P3	GAVIN_FOXP3_TARGETS_CLUSTER_P3	25/1154	160/20738	2.73426e-06	4.05218e-05	2.98178e-05	POU2F2/LYL1/ACTG2/FGL2/FCMR/ENTPD1/GPR34/EVI2A/EHD3/SORCS2/KLRG1/IGFBP4/MS4A4A/MYO1F/SPOCK2/CD200R1/CYBB/CTSL/HDAC9/SAMSN1/THEMIS/CASS4/IL21/CD74/MATN2	25
ZHU_CMV_24_HR_DN	ZHU_CMV_24_HR_DN	17/1154	84/20738	3.09368e-06	4.56657e-05	3.3603e-05	MYLK/FLNA/PTGIS/BCL2/LAMA4/CDH11/COL3A1/LOX/COL1A2/VCAN/COL1A1/MN1/POSTN/COL5A2/CHN1/THBS2/ANPEP	17
NADLER_OBESITY_UP	NADLER_OBESITY_UP	14/1154	59/20738	3.18075e-06	4.65798e-05	3.42757e-05	FLNA/LAPTM5/TLN1/FBLN2/BASP1/CD53/CTSK/BGN/ALOX5AP/COL1A1/SELPLG/POSTN/MRC1/C1QB	14
REACTOME_NON_INTEGRIN_MEMBRANE_ECM_INTERACTIONS	REACTOME_NON_INTEGRIN_MEMBRANE_ECM_INTERACTIONS	14/1154	59/20738	3.18075e-06	4.65798e-05	3.42757e-05	LAMA4/TNC/COL3A1/ACTN1/ITGB3/SDC3/COL5A1/COL1A2/TGFB1/FN1/COL1A1/COL4A2/COL5A2/COL10A1	14
LIU_TARGETS_OF_VMYB_VS_CMYB_DN	LIU_TARGETS_OF_VMYB_VS_CMYB_DN	12/1154	44/20738	3.3404e-06	4.8534e-05	3.57136e-05	GNG2/GPR18/LINC01215/S1PR3/GATA3/VCAN/COL4A2/KCNA3/TFPI2/IL12B/IL6/NKG7	12
REACTOME_INTERLEUKIN_2_FAMILY_SIGNALING	REACTOME_INTERLEUKIN_2_FAMILY_SIGNALING	12/1154	44/20738	3.3404e-06	4.8534e-05	3.57136e-05	PIK3CD/IL21R/CSF2RB/JAK3/HAVCR2/INPP5D/LCK/IL21/IL9R/JAK2/CSF2RA/IL5	12
KEGG_NEUROACTIVE_LIGAND_RECEPTOR_INTERACTION	KEGG_NEUROACTIVE_LIGAND_RECEPTOR_INTERACTION	35/1154	272/20738	3.38581e-06	4.90017e-05	3.60578e-05	P2RY8/HTR2A/CYSLTR1/CNR2/CHRNA3/TACR2/LPAR4/TACR1/GRPR/EDNRA/S1PR3/P2RY10/F2R/MLNR/P2RX7/GRIN2A/C5AR1/AGTR2/GLRA3/C3AR1/CHRNB4/CHRNA6/DRD5/FPR3/P2RY13/CALCRL/APLNR/CYSLTR2/HTR2B/ADORA1/GRIK1/GRID1/FPR1/GRM7/NPBWR1	35
WU_CELL_MIGRATION	WU_CELL_MIGRATION	27/1154	183/20738	3.42155e-06	4.93263e-05	3.62966e-05	MAP1B/EMP3/AXL/VIM/ARHGDIB/MSN/WWTR1/IGFBP7/RAB31/BICC1/GLIPR1/RAC2/GATA3/DKK3/AHNAK2/VCAN/SRGN/FN1/ARL4C/COL4A2/GJA1/TFPI2/CST6/TGFBI/SACS/CHST15/OLR1	27
TAKEDA_TARGETS_OF_NUP98_HOXA9_FUSION_10D_UP	TAKEDA_TARGETS_OF_NUP98_HOXA9_FUSION_10D_UP	28/1154	194/20738	3.51713e-06	5.05077e-05	3.7166e-05	IL31RA/SLC8A1/PLD4/ZEB1/CDC42EP3/NAPSB/CLECL1/ZNF521/TMEM255A/BEND6/GPR18/FCER2/ADGRA2/BTLA/NXPE3/SPOCK1/SLITRK4/CHRNA6/FN1/SERPINE2/TYRP1/HLA-DPB2/TNFAIP6/MIR155HG/CD38/CLNK/IDO1/LAMP5	28
REACTOME_OTHER_SEMAPHORIN_INTERACTIONS	REACTOME_OTHER_SEMAPHORIN_INTERACTIONS	8/1154	19/20738	3.90845e-06	5.59104e-05	4.11415e-05	ITGA1/PLXNA4/CD72/PTPRC/PLXNC1/TYROBP/TREM2/SEMA7A	8
BIOCARTA_BLYMPHOCYTE_PATHWAY	BIOCARTA_BLYMPHOCYTE_PATHWAY	7/1154	14/20738	3.94135e-06	5.59491e-05	4.117e-05	FCGR2B/PTPRC/CR1/CR2/ITGAL/ITGB2/HLA-DRA	7
BIOCARTA_TCRA_PATHWAY	BIOCARTA_TCRA_PATHWAY	7/1154	14/20738	3.94135e-06	5.59491e-05	4.117e-05	PTPRC/CD4/CD3G/CD3D/CD3E/LCK/HLA-DRA	7
CHIARADONNA_NEOPLASTIC_TRANSFORMATION_CDC25_UP	CHIARADONNA_NEOPLASTIC_TRANSFORMATION_CDC25_UP	21/1154	123/20738	4.05634e-06	5.73617e-05	4.22095e-05	MGP/FGF7/LAMA4/TNC/ADAM19/THY1/VCAM1/LTBP2/LOXL1/F2R/AGTR2/CCL2/IFI16/VCAN/LXN/C3/THBS2/MNDA/TWIST1/IL6/CAPN6	21
SHIPP_DLBCL_VS_FOLLICULAR_LYMPHOMA_DN	SHIPP_DLBCL_VS_FOLLICULAR_LYMPHOMA_DN	12/1154	45/20738	4.32571e-06	6.09383e-05	4.48413e-05	MEF2C/GPR18/CD180/RHOH/GLIPR1/CCL21/CD40LG/ITGA4/PMCH/CD3D/CD3E/PDCD1	12
REACTOME_REGULATION_OF_INSULIN_LIKE_GROWTH_FACTOR_IGF_TRANSPORT_AND_UPTAKE_BY_INSULIN_LIKE_GROWTH_FACTOR_BINDING_PROTEINS_IGFBPS	REACTOME_REGULATION_OF_INSULIN_LIKE_GROWTH_FACTOR_IGF_TRANSPORT_AND_UPTAKE_BY_INSULIN_LIKE_GROWTH_FACTOR_BINDING_PROTEINS_IGFBPS	21/1154	124/20738	4.63106e-06	6.47475e-05	4.76443e-05	IGF1/FSTL1/LTBP1/IGFBP7/TNC/LGALS1/FBN1/PENK/C4A/IGFBP4/MMP2/TIMP1/VCAN/MXRA8/FN1/C3/PAPPA/APOE/SCG2/SPP1/IL6	21
REACTOME_TCR_SIGNALING	REACTOME_TCR_SIGNALING	21/1154	124/20738	4.63106e-06	6.47475e-05	4.76443e-05	WAS/PLCG2/PTPRC/CD4/TRAT1/CD3G/TRAV8-4/HLA-DQA2/TRAV29DV5/CD3D/HLA-DQB2/TRBV7-9/INPP5D/CD3E/LCK/HLA-DPB1/HLA-DRA/TRBV12-3/TRAV19/HLA-DPA1/HLA-DQA1	21
BORCZUK_MALIGNANT_MESOTHELIOMA_DN	BORCZUK_MALIGNANT_MESOTHELIOMA_DN	19/1154	105/20738	4.79294e-06	6.67588e-05	4.91243e-05	CD79B/CD22/CD19/MS4A1/CD79A/FCMR/FCER2/FRZB/PTPRCAP/THSD7A/SEZ6L/NFIA/CCL2/CCL21/CD6/NCF1/KIR3DL2/CD38/WT1-AS	19
BRUINS_UVC_RESPONSE_VIA_TP53_GROUP_D	BRUINS_UVC_RESPONSE_VIA_TP53_GROUP_D	34/1154	265/20738	4.95974e-06	6.88234e-05	5.06435e-05	CD79B/PPP1R12B/KCNMA1/KERA/LTBP1/PRUNE2/FCGR2B/LAT2/RNF165/FBXO32/ADGRA2/VEGFC/CCSER2/CD48/ALDH1B1/SGCB/PAX5/OLFML2B/CCL2/TNFSF13B/CHRNA6/CYS1/KCNA3/PDCD1LG2/PXDN/CTSL/CALCRL/DUSP10/CD2/RHD/TIAM1/CPA1/SEMA3A/LRRC15	34
YAO_TEMPORAL_RESPONSE_TO_PROGESTERONE_CLUSTER_16	YAO_TEMPORAL_RESPONSE_TO_PROGESTERONE_CLUSTER_16	16/1154	78/20738	4.99079e-06	6.89958e-05	5.07704e-05	CNN1/PCOLCE/FBN1/COL3A1/ACTN1/BGN/COL6A3/SPARC/COL1A2/DAB2/VCAN/GPX7/COL1A1/PCDH7/COL4A2/PCP4L1	16
MILICIC_FAMILIAL_ADENOMATOUS_POLYPOSIS_DN	MILICIC_FAMILIAL_ADENOMATOUS_POLYPOSIS_DN	6/1154	10/20738	5.0719e-06	6.98565e-05	5.14037e-05	CCL19/CR2/CXCL13/CCL21/C3/PYY	6
REACTOME_SIGNALING_BY_INTERLEUKINS	REACTOME_SIGNALING_BY_INTERLEUKINS	50/1154	462/20738	5.42904e-06	7.44985e-05	5.48195e-05	MEF2C/IL31RA/ZEB1/BCL2/VIM/MSN/CCL19/FCER2/VAV1/PIK3CD/LCP1/EBI3/VCAM1/MMP2/GATA3/CCL2/TIMP1/COL1A2/CD4/PTPN7/IL21R/CSF2RB/TGFB1/JAK3/FN1/CCR5/ITGB2/CRLF2/IL12B/CD86/HAVCR2/IL1RAPL1/CCR1/INPP5D/IL34/IL12RB1/LCK/IL21/IL9R/JAK2/CCL22/IGHG4/FPR1/CCL5/CSF2RA/TWIST1/SOCS1/IL5/ITGAM/IL6	50
REACTOME_INTERLEUKIN_10_SIGNALING	REACTOME_INTERLEUKIN_10_SIGNALING	12/1154	46/20738	5.55784e-06	7.59845e-05	5.5913e-05	CCL19/FCER2/CCL2/TIMP1/CCR5/IL12B/CD86/CCR1/CCL22/FPR1/CCL5/IL6	12
DEMAGALHAES_AGING_UP	DEMAGALHAES_AGING_UP	13/1154	54/20738	5.9984e-06	8.17061e-05	6.01233e-05	MSN/FCGR2B/LAPTM5/MPEG1/C4A/HCST/GPNMB/C3/FCGR2A/C1QA/C1QC/C1QB/SPP1	13
KAAB_HEART_ATRIUM_VS_VENTRICLE_UP	KAAB_HEART_ATRIUM_VS_VENTRICLE_UP	33/1154	256/20738	6.14672e-06	8.31772e-05	6.12058e-05	MYLK/FLRT2/DPYSL3/MAP1B/PTGIS/PRUNE2/VIM/MYH11/FRRS1L/HEG1/FGL2/LILRA4/EDNRA/AEBP1/RAB33A/FBLN2/ACTN1/BASP1/GJA5/SOD3/ISLR/SPOCK1/VASH1/TRAC/EPB41L3/RELN/VCAN/PDE4B/TGFB1/MICAL2/ALDH1A2/FEV/ADORA1	33
BIOCARTA_IL12_PATHWAY	BIOCARTA_IL12_PATHWAY	8/1154	20/20738	6.1962e-06	8.31772e-05	6.12058e-05	CCR5/CD3G/LILRB1/CD3D/CD3E/IL12RB1/JAK2/CXCR3	8
FERRANDO_TAL1_NEIGHBORS	FERRANDO_TAL1_NEIGHBORS	8/1154	20/20738	6.1962e-06	8.31772e-05	6.12058e-05	TRAC/CD6/ITGB2/TRBC2/CD2/CD3E/LCK/TMSB15A	8
MAHADEVAN_IMATINIB_RESISTANCE_DN	MAHADEVAN_IMATINIB_RESISTANCE_DN	8/1154	20/20738	6.1962e-06	8.31772e-05	6.12058e-05	BCHE/MEOX2/PTGIS/FGL2/VCAM1/CXCR4/SRGN/ALDH1A2	8
KATSANOU_ELAVL1_TARGETS_UP	KATSANOU_ELAVL1_TARGETS_UP	24/1154	157/20738	6.33685e-06	8.47583e-05	6.23692e-05	IGF1/CD52/MYH11/HMCN1/LAPTM5/MPEG1/PLEKHA2/CD200/NRK/PDE5A/MMP2/ALDH1A3/OLFML2B/ENG/C3AR1/CYBB/FAS/C1QA/C1QC/SLFN12L/APOE/C1QB/CCL17/FXYD6-FXYD2	24
CROONQUIST_NRAS_VS_STROMAL_STIMULATION_DN	CROONQUIST_NRAS_VS_STROMAL_STIMULATION_DN	18/1154	98/20738	6.80983e-06	9.07569e-05	6.67832e-05	HSPB6/LAMA4/IGFBP7/BASP1/IGFBP4/COL6A3/SPARC/COL1A2/VCAN/SULF1/GJA1/LILRB1/POSTN/THBS2/TGFBI/IL6/CLC/LUZP2	18
REACTOME_NEUTROPHIL_DEGRANULATION	REACTOME_NEUTROPHIL_DEGRANULATION	51/1154	479/20738	6.95412e-06	9.23478e-05	6.79539e-05	DOK3/LRMP/HVCN1/ATP8B4/NCKAP1L/FGL2/ELANE/RAB31/TIMP2/ARSB/PTPRC/GLIPR1/CD53/SELL/VCL/LAIR1/CR1/PECAM1/BIN2/C5AR1/SLC2A5/ITGAL/C3AR1/CLEC4C/TYROBP/CHRNB4/CD44/ITGB2/SIGLEC5/CYBB/CD93/C3/BPI/CD14/FCGR2A/SIGLEC9/HP/BST1/FRMPD3/RNASE2/NFAM1/MNDA/FPR1/TNFAIP6/OLR1/ITGAM/SIGLEC14/OSCAR/RNASE3/ANPEP/ADGRE3	51
BIOCARTA_GRANULOCYTES_PATHWAY	BIOCARTA_GRANULOCYTES_PATHWAY	7/1154	15/20738	7.03425e-06	9.27469e-05	6.82476e-05	SELP/SELL/PECAM1/ITGAL/ITGB2/SELPLG/ITGAM	7
SA_MMP_CYTOKINE_CONNECTION	SA_MMP_CYTOKINE_CONNECTION	7/1154	15/20738	7.03425e-06	9.27469e-05	6.82476e-05	TNFSF8/SELL/SPN/TGFB1/CD44/TGFB2/FCGR3A	7
LIEN_BREAST_CARCINOMA_METAPLASTIC	LIEN_BREAST_CARCINOMA_METAPLASTIC	10/1154	33/20738	7.8169e-06	0.000102701	7.55721e-05	LUM/PPP1R12A/SFRP2/PRRX1/SPARC/MMP16/HTRA3/MXRA8/POSTN/THBS2	10
LANDIS_BREAST_CANCER_PROGRESSION_DN	LANDIS_BREAST_CANCER_PROGRESSION_DN	15/1154	72/20738	8.02653e-06	0.000105082	7.73246e-05	CCDC80/ZEB1/FSTL1/LUM/ANGPTL2/PENK/COL3A1/COL6A3/HTRA1/COL5A1/NRP1/COL1A1/GJA1/TGFBI/MRC1	15
LU_IL4_SIGNALING	LU_IL4_SIGNALING	17/1154	90/20738	8.2524e-06	0.000107659	7.92206e-05	CD79B/EBF1/GNG2/FGL2/TLR7/FCER2/VEGFC/EVI2A/SELL/VCL/CD86/KMO/SAMSN1/WT1/CCL5/SOCS1/IL6	17
RUTELLA_RESPONSE_TO_HGF_VS_CSF2RB_AND_IL4_DN	RUTELLA_RESPONSE_TO_HGF_VS_CSF2RB_AND_IL4_DN	32/1154	248/20738	8.28246e-06	0.000107672	7.92302e-05	FCER1A/RFTN1/FILIP1L/LPP/MAP4K1/CCL19/PPP1R12A/CLIC2/ADAM19/MS4A6A/CD1E/RAB8B/CCSER2/EBI3/SPOCK1/ROBO1/ARHGAP22/CCR7/CXCR4/CD84/NREP/ITGA4/VCAN/IL21R/CD83/CCL13/CD86/CD209/CCL22/CSF2RA/CCL17/ADAM12	32
LEE_AGING_CEREBELLUM_UP	LEE_AGING_CEREBELLUM_UP	16/1154	81/20738	8.32927e-06	0.000107902	7.93994e-05	AXL/MPEG1/TBC1D1/C4A/CCL21/SELPLG/C1QA/C1QC/THBS2/APOE/C1QB/AGT/SPP1/GBP4/CST7/SEZ6	16
HOWLIN_PUBERTAL_MAMMARY_GLAND	HOWLIN_PUBERTAL_MAMMARY_GLAND	14/1154	64/20738	8.8208e-06	0.000113871	8.37919e-05	VPREB3/FCRLA/CPXM1/FCGR2B/ANGPTL2/PENK/EVI2A/LIMD2/SFRP4/MSR1/IFI16/THBS2/NPR3/TWIST1	14
BURTON_ADIPOGENESIS_7	BURTON_ADIPOGENESIS_7	12/1154	48/20738	8.97507e-06	0.000115461	8.49614e-05	RHOJ/FBN1/TIMP2/THY1/FBLN2/ACTN1/S1PR3/VCAM1/TIMP1/CD44/SERPINE2/TGFBI	12
REACTOME_CELL_SURFACE_INTERACTIONS_AT_THE_VASCULAR_WALL	REACTOME_CELL_SURFACE_INTERACTIONS_AT_THE_VASCULAR_WALL	27/1154	194/20738	1.03671e-05	0.000132907	9.77991e-05	VPREB3/SELP/CD48/SELL/ITGB3/PECAM1/SDC3/SPN/CD84/COL1A2/ITGA4/ITGAL/TGFB1/CD44/FN1/COL1A1/ITGB2/DOK2/SELPLG/CD2/INPP5D/LCK/OLR1/CD74/ITGAM/IGKV2D-30/IGKV4-1	27
DANG_REGULATED_BY_MYC_DN	DANG_REGULATED_BY_MYC_DN	32/1154	251/20738	1.06357e-05	0.00013588	9.99868e-05	MGP/CALD1/FSTL1/LRMP/MSN/A2M/ARHGAP25/TIMP2/THY1/COL3A1/CD48/VCAM1/COL6A3/SPARC/F2R/LOX/NREP/COL5A1/COL1A2/SLC2A5/ITGAL/PDGFRB/TGFB1/AQP1/FN1/LXN/COL1A1/FZD1/FAS/ELAVL4/POSTN/CD3E	32
PLASARI_TGFB1_SIGNALING_VIA_NFIC_10HR_UP	PLASARI_TGFB1_SIGNALING_VIA_NFIC_10HR_UP	13/1154	57/20738	1.13429e-05	0.000144417	0.000106269	FGF7/MYH11/CPXM1/RGS4/ITGA1/SLMAP/VCAM1/GVINP1/NREP/FAS/SEMA3C/OLR1/CD38	13
CHEN_LVAD_SUPPORT_OF_FAILING_HEART_DN	CHEN_LVAD_SUPPORT_OF_FAILING_HEART_DN	11/1154	42/20738	1.3097e-05	0.00016618	0.000122283	PTGIS/GIMAP4/NKX2-5/CCL2/CCL21/NRP1/PDE4B/GJA1/CD14/APLNR/TGFBI	11
KEGG_B_CELL_RECEPTOR_SIGNALING_PATHWAY	KEGG_B_CELL_RECEPTOR_SIGNALING_PATHWAY	15/1154	75/20738	1.35408e-05	0.000171224	0.000125995	CD79B/CD22/PRKCB/CD19/FCGR2B/CD79A/PIK3CG/PLCG2/CD72/VAV1/PIK3CD/CR2/RAC2/NFATC1/INPP5D	15
DACOSTA_ERCC3_ALLELE_XPCS_VS_TTD_DN	DACOSTA_ERCC3_ALLELE_XPCS_VS_TTD_DN	10/1154	35/20738	1.4002e-05	0.000176453	0.000129843	CNN1/SYNM/LPXN/DOK5/PDGFRL/CXCR4/RAMP2/COL1A2/VCAN/LILRB1	10
HENDRICKS_SMARCA4_TARGETS_DN	HENDRICKS_SMARCA4_TARGETS_DN	12/1154	50/20738	1.41064e-05	0.000177167	0.000130368	ARHGDIB/LUM/A2M/NRP2/GPR183/LTBP2/HCST/NRP1/TREM2/CCR1/HLA-DRA/CD74	12
LU_TUMOR_ENDOTHELIAL_MARKERS_UP	LU_TUMOR_ENDOTHELIAL_MARKERS_UP	8/1154	22/20738	1.42326e-05	0.000177549	0.000130649	ADAP2/VCAN/POSTN/CHN1/TWIST1/TNFAIP6/EGFL6/ADAM12	8
WANG_IMMORTALIZED_BY_HOXA9_AND_MEIS1_DN	WANG_IMMORTALIZED_BY_HOXA9_AND_MEIS1_DN	8/1154	22/20738	1.42326e-05	0.000177549	0.000130649	LY86/EBF1/EDNRA/PTPRCAP/CD27/TSPAN2/CD93/CALCRL	8
RHEIN_ALL_GLUCOCORTICOID_THERAPY_UP	RHEIN_ALL_GLUCOCORTICOID_THERAPY_UP	15/1154	76/20738	1.60122e-05	0.000199077	0.000146491	LY86/RGS13/MS4A1/GPR18/GPR183/PTPRC/GLIPR1/GPR65/P2RY10/ABCA1/SWAP70/LY96/NOTCH2/MNDA/ITGAM	15
MIKKELSEN_NPC_HCP_WITH_H3K4ME3_AND_H3K27ME3	MIKKELSEN_NPC_HCP_WITH_H3K4ME3_AND_H3K27ME3	28/1154	210/20738	1.61961e-05	0.00020069	0.000147677	KCNMA1/SYNM/PLXNA4/GPR88/TACR1/BHLHE22/TSPAN18/CDH11/KCNA1/KCNK12/NGFR/NPPC/FAM78A/CXCR4/RELN/TENM4/SH3RF3/FGF5/SIX2/TGFB1/KCNA3/EOMES/SEMA7A/ADORA1/GPC5/ADAMTS2/FOXC2/RASGRF1	28
SMIRNOV_RESPONSE_TO_IR_6HR_DN	SMIRNOV_RESPONSE_TO_IR_6HR_DN	19/1154	114/20738	1.64383e-05	0.000203012	0.000149386	CD22/GPR18/SIT1/ENTPD1/PTPRCAP/RNASE6/EVI2A/RAB33A/PTPRC/KCTD12/TCL1A/CR2/LTA/ITGA4/CYBB/RGS1/CCR1/EGR3/AIM2	19
FOSTER_TOLERANT_MACROPHAGE_UP	FOSTER_TOLERANT_MACROPHAGE_UP	24/1154	166/20738	1.66249e-05	0.000204635	0.00015058	FGL2/GPR18/MS4A6A/CD200/SELL/MS4A4A/ELK3/LRRC8C/MSR1/RGL1/LOX/C3orf70/ITGAL/AOAH/RGS1/HP/BST1/IGSF6/TGFBI/FPR1/RASGRP1/SPIC/CD38/CST7	24
VANASSE_BCL2_TARGETS_DN	VANASSE_BCL2_TARGETS_DN	13/1154	59/20738	1.69055e-05	0.0002074	0.000152615	BCL2/CR2/LTA/CMTM3/PLXNC1/COL5A1/HCST/IFI16/FN1/TRPS1/CCR1/LILRB4/CCND2	13
MORI_IMMATURE_B_LYMPHOCYTE_UP	MORI_IMMATURE_B_LYMPHOCYTE_UP	12/1154	51/20738	1.75199e-05	0.000214229	0.00015764	DTX1/PIP4K2A/CNR2/MS4A1/CD72/LAT2/PTPRC/SLC25A53/GPR65/CD83/HLA-DMB/CD74	12
TAKEDA_TARGETS_OF_NUP98_HOXA9_FUSION_8D_UP	TAKEDA_TARGETS_OF_NUP98_HOXA9_FUSION_8D_UP	23/1154	156/20738	1.79466e-05	0.000218345	0.000160668	MEF2C/PLD4/GPR18/CLEC2B/ADGRA2/HIC1/IGFBP4/SPOCK1/CCR7/F2R/LINC00996/LXN/GJA1/TYRP1/C3orf80/MYH10/CHST2/APOC1/TNFAIP6/MIR155HG/MYCN/IDO1/LAMP5	23
GILDEA_METASTASIS	GILDEA_METASTASIS	9/1154	29/20738	1.80333e-05	0.000218345	0.000160668	ARHGDIB/GLIPR1/IGFBP4/SPARC/RAC2/IFI16/SRGN/FN1/COL5A2	9
LU_TUMOR_VASCULATURE_UP	LU_TUMOR_VASCULATURE_UP	9/1154	29/20738	1.80333e-05	0.000218345	0.000160668	ADAP2/VCAN/POSTN/CHN1/TWIST1/TNFAIP6/SPP1/EGFL6/ADAM12	9
MORI_PLASMA_CELL_DN	MORI_PLASMA_CELL_DN	10/1154	36/20738	1.84253e-05	0.000221641	0.000163094	DTX1/CD22/TNFRSF13C/MS4A1/TESPA1/LAPTM5/TLR1/ELK3/CD83/SPIB	10
NAKAMURA_ADIPOGENESIS_LATE_DN	NAKAMURA_ADIPOGENESIS_LATE_DN	10/1154	36/20738	1.84253e-05	0.000221641	0.000163094	CALD1/ACTG2/MYH11/GLIPR1/COL15A1/LOX/DKK3/SERPINE2/POSTN/THBS2	10
CERVERA_SDHB_TARGETS_2	CERVERA_SDHB_TARGETS_2	19/1154	115/20738	1.86797e-05	0.000223975	0.000164811	FLRT2/FILIP1L/THBS4/SH3BGRL/A2M/IGFBP7/FMO1/SCG5/LTBP2/VGLL3/FXYD2/PRRX1/MOXD1/MICAL2/SERPINE2/GJA1/TGFB2/HDAC9/MATN2	19
CLAUS_PGR_POSITIVE_MENINGIOMA_DN	CLAUS_PGR_POSITIVE_MENINGIOMA_DN	6/1154	12/20738	2.02575e-05	0.000242109	0.000178156	FSTL1/BCL2/HEG1/FMNL3/EDNRA/PDGFRB	6
KEGG_AUTOIMMUNE_THYROID_DISEASE	KEGG_AUTOIMMUNE_THYROID_DISEASE	12/1154	52/20738	2.16319e-05	0.000256879	0.000189024	CD28/CD40LG/FAS/HLA-DQA2/CD86/HLA-DMB/HLA-DPB1/HLA-DRA/HLA-DOA/IL5/HLA-DPA1/HLA-DQA1	12
ROSS_AML_WITH_CBFB_MYH11_FUSION	ROSS_AML_WITH_CBFB_MYH11_FUSION	12/1154	52/20738	2.16319e-05	0.000256879	0.000189024	CD1C/MDFIC/CD52/MYH11/GIMAP4/CD1E/KCTD12/SPARC/NRP1/CYBB/MN1/TGFBI	12
KEGG_NATURAL_KILLER_CELL_MEDIATED_CYTOTOXICITY	KEGG_NATURAL_KILLER_CELL_MEDIATED_CYTOTOXICITY	21/1154	137/20738	2.25884e-05	0.00026738	0.000196751	PRKCB/PIK3CG/PLCG2/VAV1/PIK3CD/CD48/SHC4/RAC2/HCST/NFATC1/ITGAL/TYROBP/SH2D1A/NCR3/ITGB2/FAS/LCK/FCGR3A/KIR2DS4/KIR3DL2/KIR3DL1	21
SHIN_B_CELL_LYMPHOMA_CLUSTER_8	SHIN_B_CELL_LYMPHOMA_CLUSTER_8	10/1154	37/20738	2.39971e-05	0.00028315	0.000208355	TNFRSF13C/LMO1/MAFB/SPN/SPI1/IL21R/TYROBP/FAS/CD38/ITGAM	10
HATADA_METHYLATED_IN_LUNG_CANCER_UP	HATADA_METHYLATED_IN_LUNG_CANCER_UP	41/1154	372/20738	2.43503e-05	0.000286286	0.000210663	CNN1/LYL1/HSPB6/TACR1/ANGPTL2/PENK/FRZB/LIMD2/LDLRAD4/MARVELD1/IGFBP4/NLRC3/ARHGAP22/GATA3/GRIN2A/SLITRK4/COL5A1/COL1A2/SPOCK2/PCDHGA3/LXN/COL1A1/DYSF/SCARF2/CD93/BCAT1/NFIX/BNC1/GP1BA/CST6/TGFBI/NFAM1/LCK/RASGRP1/TWIST1/NELL1/PCDHGB2/PCDHGC4/GNA14/WT1-AS/GRM7	41
TING_SILENCED_BY_DICER	TING_SILENCED_BY_DICER	9/1154	30/20738	2.44947e-05	0.000286286	0.000210663	GNG2/VIM/SFRP4/SPARC/CXCR4/RTN1/TRIM6/APOBEC3G/RASGRP1	9
WESTON_VEGFA_TARGETS_12HR	WESTON_VEGFA_TARGETS_12HR	9/1154	30/20738	2.44947e-05	0.000286286	0.000210663	MGP/THY1/BGN/COL6A3/MMP2/CCL2/COL5A1/COL1A2/TFPI2	9
KANG_IMMORTALIZED_BY_TERT_UP	KANG_IMMORTALIZED_BY_TERT_UP	16/1154	88/20738	2.48764e-05	0.000289833	0.000213273	CDC42EP3/ACTG2/CHRNA3/TNC/COL8A1/CACNA2D1/VCAM1/BGN/IL21R/TGFB1/PCDH7/LEFTY2/C3/TGFB2/POSTN/MAPK4	16
LU_AGING_BRAIN_UP	LU_AGING_BRAIN_UP	32/1154	262/20738	2.54773e-05	0.000295905	0.000217741	PDLIM3/RASSF2/CALD1/DPYSL3/ECM2/PARVA/LPP/BCL2/LTBP1/FGF1/VIM/MSN/WWTR1/PIP4K2A/SSPN/SPON1/CLIC2/CLEC2B/ZNF423/TLN1/HTRA1/PECAM1/ZBTB20/PLXNC1/IFI16/VCAN/GJA1/HP/AGT/GPC5/CAV2/MLC1	32
BOSCO_ALLERGEN_INDUCED_TH2_ASSOCIATED_MODULE	BOSCO_ALLERGEN_INDUCED_TH2_ASSOCIATED_MODULE	22/1154	149/20738	2.64764e-05	0.000306436	0.00022549	MEF2C/BCL2/STAP1/CYSLTR1/FCER2/TBC1D1/IKZF1/RAB30/PECAM1/CXCL13/CD84/CD200R1/DACT1/CD83/EOMES/CYSLTR2/SEMA7A/CCL22/TIAM1/MIR155HG/SOCS1/IL5	22
REACTOME_ELASTIC_FIBRE_FORMATION	REACTOME_ELASTIC_FIBRE_FORMATION	11/1154	45/20738	2.66322e-05	0.000306436	0.00022549	LTBP1/FBN1/FBLN2/LTBP2/ITGB3/LOXL1/LOX/TGFB1/FN1/TGFB2/GDF5	11
SCHAEFFER_SOX9_TARGETS_IN_PROSTATE_DEVELOPMENT_DN	SCHAEFFER_SOX9_TARGETS_IN_PROSTATE_DEVELOPMENT_DN	11/1154	45/20738	2.66322e-05	0.000306436	0.00022549	IGF1/RASSF2/ZNF521/TCF4/SYT4/BASP1/ETS1/PCDH18/NFIX/ELAVL4/TIAM1	11
GAUSSMANN_MLL_AF4_FUSION_TARGETS_F_UP	GAUSSMANN_MLL_AF4_FUSION_TARGETS_F_UP	25/1154	182/20738	2.72569e-05	0.000312653	0.000230065	OGN/RNF150/CNN1/PLXDC2/ACTG2/PRICKLE1/SYNM/RGS4/ATP8B4/PLCG2/BHLHE22/ARSB/COL3A1/TLR1/LTBP2/C1orf54/PCDHB18P/LOX/DKK3/DAB2/FGF5/DYSF/NPR3/ADAMTS2/MATN2	25
JEON_SMAD6_TARGETS_UP	JEON_SMAD6_TARGETS_UP	8/1154	24/20738	2.96254e-05	0.000338243	0.000248895	RFTN1/FILIP1L/FBN1/TIMP2/DKK3/FAS/TGFB2/MMP7	8
MIKKELSEN_MEF_LCP_WITH_H3K4ME3	MIKKELSEN_MEF_LCP_WITH_H3K4ME3	20/1154	129/20738	2.96704e-05	0.000338243	0.000248895	OGN/OLFML1/ECM2/ASPN/ACTG2/EMP3/ARHGDIB/LUM/PCOLCE/HACD4/ANGPTL2/COL3A1/GPSM3/C1orf54/GAL3ST4/CCL2/PDGFRB/TLR4/POSTN/SLFN12L	20
REACTOME_CROSSLINKING_OF_COLLAGEN_FIBRILS	REACTOME_CROSSLINKING_OF_COLLAGEN_FIBRILS	7/1154	18/20738	3.00085e-05	0.000341048	0.000250959	PCOLCE/LOXL1/LOX/COL1A2/COL1A1/COL4A2/PXDN	7
BOHN_PRIMARY_IMMUNODEFICIENCY_SYNDROM_DN	BOHN_PRIMARY_IMMUNODEFICIENCY_SYNDROM_DN	10/1154	38/20738	3.0953e-05	0.000349636	0.000257279	VPREB3/TLR7/VCL/MOXD1/LST1/DPYD/LTB/KMO/INPP5D/CHI3L2	10
TARTE_PLASMA_CELL_VS_B_LYMPHOCYTE_DN	TARTE_PLASMA_CELL_VS_B_LYMPHOCYTE_DN	10/1154	38/20738	3.0953e-05	0.000349636	0.000257279	LYL1/CD37/MS4A1/GPR18/RHOH/LTB/CD83/HLA-DMB/CIITA/CXCR5	10
HENDRICKS_SMARCA4_TARGETS_UP	HENDRICKS_SMARCA4_TARGETS_UP	12/1154	54/20738	3.24338e-05	0.000364143	0.000267954	ATP2B4/MAP1B/EMP3/LGALS1/THY1/IGFBP4/CCL2/PTPN7/SERPINE2/ARL4C/LILRB1/AGT	12
SCHAEFFER_PROSTATE_DEVELOPMENT_12HR_DN	SCHAEFFER_PROSTATE_DEVELOPMENT_12HR_DN	12/1154	54/20738	3.24338e-05	0.000364143	0.000267954	COL8A1/HIC1/SYT4/BASP1/IGFBP4/PRRX1/LIX1/ELAVL4/TGFBI/LYPD1/GNA14/FXYD6-FXYD2	12
TONKS_TARGETS_OF_RUNX1_RUNX1T1_FUSION_HSC_UP	TONKS_TARGETS_OF_RUNX1_RUNX1T1_FUSION_HSC_UP	25/1154	184/20738	3.28449e-05	0.000367645	0.000270531	TUBA1A/CDC42EP3/FSTL1/RGS13/CLEC2B/EVI2A/COL3A1/RAB33A/THSD7A/CD200/NPTX1/SPARC/ZBTB20/IFI16/DAB2/VCAN/PDE4B/RGS1/RRAS/CALCRL/ALDH1A2/SAMSN1/APOE/GDF3/UCHL1	25
KUNINGER_IGF1_VS_PDGFB_TARGETS_DN	KUNINGER_IGF1_VS_PDGFB_TARGETS_DN	11/1154	46/20738	3.32556e-05	0.000370006	0.000272268	MGP/CPED1/GREM1/FBXO32/CD53/F2R/TIMP1/CSF2RB/THBS2/PHEX/CAV2	11
SIG_BCR_SIGNALING_PATHWAY	SIG_BCR_SIGNALING_PATHWAY	11/1154	46/20738	3.32556e-05	0.000370006	0.000272268	CD22/BCL2/CD19/MAP4K1/PLCG2/VAV1/PIK3CD/PTPRC/CR2/NFATC1/INPP5D	11
BIOCARTA_CTL_PATHWAY	BIOCARTA_CTL_PATHWAY	6/1154	13/20738	3.58463e-05	0.000397637	0.0002926	ITGAL/ITGB2/FAS/CD3G/CD3D/CD3E	6
PID_CXCR4_PATHWAY	PID_CXCR4_PATHWAY	17/1154	101/20738	3.96337e-05	0.000438336	0.000322549	GNG2/ITGA1/PIK3CG/VAV1/PIK3CD/PTPRC/CXCR4/ITGA4/CD4/RGS1/CD3G/CD3D/CD3E/LCK/JAK2/ITGA11/HLA-DRA	17
ODONNELL_TFRC_TARGETS_UP	ODONNELL_TFRC_TARGETS_UP	44/1154	419/20738	4.06261e-05	0.000447975	0.000329642	MYLK/CALD1/CDC42EP3/SERPINA9/CD37/TMEM156/CD72/FCMR/MPEG1/CX3CR1/ADGRA2/MYO1G/CD27/GLIPR1/RBM43/SLAMF6/ZBTB20/PYHIN1/PDE4B/CD44/CCR5/FAS/RGS1/GPR85/APOBEC3G/ART4/PAPPA/FCRL4/CASS4/PTCRA/IL21/POU3F1/TNFAIP6/ZNF727/TIAM1/PCDH11X/IL5/ITGAM/PCYT1B/CYP19A1/HLA-DQA1/GRM7/BIRC7/TRAV24	44
BURTON_ADIPOGENESIS_PEAK_AT_0HR	BURTON_ADIPOGENESIS_PEAK_AT_0HR	13/1154	64/20738	4.23607e-05	0.000465716	0.000342696	MGP/IGF1/OGN/COL8A1/VEGFC/SFRP2/TLN1/CTSK/NREP/DAB2/PDGFRB/THBS2/SPP1	13
SHIN_B_CELL_LYMPHOMA_CLUSTER_9	SHIN_B_CELL_LYMPHOMA_CLUSTER_9	7/1154	19/20738	4.52336e-05	0.00049583	0.000364855	CD19/CD79A/NKX3-2/PAX5/IKZF3/SPIB/CXCR5	7
MULLIGHAN_MLL_SIGNATURE_2_UP	MULLIGHAN_MLL_SIGNATURE_2_UP	44/1154	421/20738	4.5504e-05	0.000497322	0.000365953	RASSF2/FLNA/CDC42EP3/THBS4/IGFBP7/ATP8B4/MBNL1/LGALS1/LAPTM5/LAT2/RNASE6/CXorf21/IKZF1/LCP1/EVI2B/NXPE3/LAIR1/AP1S2/PECAM1/RAC2/CD300C/CXCR4/PLXNC1/LILRA1/SPI1/LST1/ITGAL/MYO1F/SRGN/NCF1/ITGB2/CTSL/SELPLG/CCR1/RNASE2/TRAV13-2/NLRP3/LILRB4/PILRA/FCGR1A/GNA14/APOC2/RNASE3/NKG7	44
HOQUE_METHYLATED_IN_CANCER	HOQUE_METHYLATED_IN_CANCER	12/1154	56/20738	4.76353e-05	0.000517562	0.000380847	TIMP2/HIC1/SFRP4/SEZ6L/PAX5/DAB2/VCAN/WT1/APOC1/TWIST1/SOCS1/CCND2	12
WIEDERSCHAIN_TARGETS_OF_BMI1_AND_PCGF2	WIEDERSCHAIN_TARGETS_OF_BMI1_AND_PCGF2	12/1154	56/20738	4.76353e-05	0.000517562	0.000380847	CCDC80/KCNN3/MAP1B/AXL/ADAM19/SDC3/COL5A1/ITGA4/MICAL2/ABLIM3/PAPPA/MMP7	12
MIKKELSEN_IPS_ICP_WITH_H3K4ME3_AND_H327ME3	MIKKELSEN_IPS_ICP_WITH_H3K4ME3_AND_H327ME3	19/1154	123/20738	4.89898e-05	0.000530722	0.000390531	CNN1/LYL1/RHOJ/TNFRSF13C/ADAMTS16/LAMA4/FGL2/VAV1/KLHL5/ISLR/FOXS1/RGS8/LTA/ISLR2/CD44/BRINP3/CIITA/KCND2/MEGF10	19
HOFFMANN_IMMATURE_TO_MATURE_B_LYMPHOCYTE_UP	HOFFMANN_IMMATURE_TO_MATURE_B_LYMPHOCYTE_UP	10/1154	40/20738	5.01393e-05	0.000541592	0.000398529	BCL2/GIMAP4/RHOH/SELL/MS4A4A/CR2/APOE/CIITA/JAK2/HLA-DQA1	10
FARMER_BREAST_CANCER_CLUSTER_1	FARMER_BREAST_CANCER_CLUSTER_1	11/1154	48/20738	5.0847e-05	0.000544474	0.00040065	GPR18/GIMAP4/CD48/GZMK/SH2D1A/CCR5/TRBC2/CD3D/CD2/LCK/CD38	11
PARK_APL_PATHOGENESIS_DN	PARK_APL_PATHOGENESIS_DN	11/1154	48/20738	5.0847e-05	0.000544474	0.00040065	CORO1A/ELANE/RAB31/PECAM1/SPI1/GPNMB/SRGN/CYBB/COL4A2/MNDA/RNASE3	11
ZHAN_MULTIPLE_MYELOMA_CD2_UP	ZHAN_MULTIPLE_MYELOMA_CD2_UP	11/1154	48/20738	5.0847e-05	0.000544474	0.00040065	VPREB3/SLC8A1/DTX1/RGS13/TNFRSF13C/MS4A1/FCRLB/CD79A/CD27/TNFSF8/PAX5	11
RICKMAN_HEAD_AND_NECK_CANCER_A	RICKMAN_HEAD_AND_NECK_CANCER_A	17/1154	103/20738	5.12915e-05	0.000547651	0.000402988	RNF150/LSAMP/PABPC4L/BCL2/PENK/FRZB/CD200/TSPAN2/PRRX1/MOXD1/ADD2/FDCSP/SPIB/NLGN4X/TMSB15A/MYCN/UCHL1	17
BROWNE_HCMV_INFECTION_24HR_DN	BROWNE_HCMV_INFECTION_24HR_DN	21/1154	145/20738	5.35072e-05	0.000569667	0.000419188	CALD1/KCNMA1/OLFML1/PARVA/PRKG1/FGF1/LAMA4/SSPN/FBN1/COL8A1/CTSO/CDON/COL6A3/SGCB/CRIM1/PDGFRB/GPR176/CD44/COL5A2/BST1/SEMA3C	21
RUIZ_TNC_TARGETS_UP	RUIZ_TNC_TARGETS_UP	22/1154	156/20738	5.41783e-05	0.000575159	0.00042323	FLRT2/ATP2B4/A2M/IGFBP7/CDH11/EDNRA/COL3A1/MAFB/VCAM1/ROBO1/PDE5A/KCTD12/ZBTB20/OLFML2B/COL1A2/PDGFRB/COL5A2/SEMA3C/APOE/CHST15/SCG2/SPP1	22
PID_INTEGRIN_CS_PATHWAY	PID_INTEGRIN_CS_PATHWAY	8/1154	26/20738	5.69598e-05	0.00060296	0.000443687	ITGA1/ITGB3/ITGAD/ITGA4/ITGAL/ITGB2/ITGA11/ITGAM	8
BIOCARTA_LYM_PATHWAY	BIOCARTA_LYM_PATHWAY	6/1154	14/20738	5.9775e-05	0.000630959	0.00046429	SELL/VCAM1/PECAM1/ITGA4/ITGAL/ITGB2	6
LI_WILMS_TUMOR_VS_FETAL_KIDNEY_2_DN	LI_WILMS_TUMOR_VS_FETAL_KIDNEY_2_DN	11/1154	49/20738	6.22982e-05	0.000655724	0.000482513	CDH11/FRZB/GATA3/COL5A1/DAB2/FZD1/COL4A2/SEMA3C/APOE/AGT/SPP1	11
KUROZUMI_RESPONSE_TO_ONCOCYTIC_VIRUS_AND_CYCLIC_RGD	KUROZUMI_RESPONSE_TO_ONCOCYTIC_VIRUS_AND_CYCLIC_RGD	7/1154	20/20738	6.62537e-05	0.000691465	0.000508813	LTA/CD40LG/CCR4/CCR5/CCR1/CCL22/CCR9	7
MOROSETTI_FACIOSCAPULOHUMERAL_MUSCULAR_DISTROPHY_UP	MOROSETTI_FACIOSCAPULOHUMERAL_MUSCULAR_DISTROPHY_UP	7/1154	20/20738	6.62537e-05	0.000691465	0.000508813	PRG4/EBF2/SCG5/COL6A3/LXN/POSTN/THBS2	7
SU_THYMUS	SU_THYMUS	7/1154	20/20738	6.62537e-05	0.000691465	0.000508813	RHOH/PIK3CD/CD1E/ETS1/SH2D1A/CCR9/ADAMDEC1	7
JECHLINGER_EPITHELIAL_TO_MESENCHYMAL_TRANSITION_UP	JECHLINGER_EPITHELIAL_TO_MESENCHYMAL_TRANSITION_UP	13/1154	67/20738	7.00628e-05	0.000729165	0.000536554	PCOLCE/TNC/FMO1/COL3A1/C4A/HTRA1/MMP2/SPARC/CCL2/DAB2/PDGFRB/RRAS/GBP4	13
COATES_MACROPHAGE_M1_VS_M2_UP	COATES_MACROPHAGE_M1_VS_M2_UP	15/1154	86/20738	7.29023e-05	0.000756591	0.000556736	FILIP1L/PLXDC2/AXL/GNB4/FAM124A/ARSB/MSR1/AIF1/CRIM1/CXCR4/GJA1/P2RY13/TGFBI/TIFAB/HLA-DQA1	15
REACTOME_MUSCLE_CONTRACTION	REACTOME_MUSCLE_CONTRACTION	26/1154	205/20738	7.55522e-05	0.000781902	0.000575361	MYLK/CALD1/SLC8A1/ATP2B4/ACTG2/VIM/MYH11/WWTR1/ABCC9/ITGA1/MYBPC2/CLIC2/KCNIP1/CACNA2D1/TLN1/KCNK12/NPPC/NOS1/VCL/NKX2-5/FXYD2/DYSF/KCND2/KCND3/KCNK13/KCNK4	26
MIKKELSEN_NPC_ICP_WITH_H3K4ME3	MIKKELSEN_NPC_ICP_WITH_H3K4ME3	45/1154	444/20738	7.80205e-05	0.000805198	0.000592503	BCHE/CALD1/GNG2/HSPB6/RHOJ/AXL/TXLNB/SH3BGRL/SCRG1/A2M/LPAR4/SSPN/CORO1A/ENTPD1/CTSO/GPR183/KLHL5/TSPAN11/ABCD2/VCAM1/FKBP7/SPARC/LY96/P2RX7/PCDHB4/GPX8/PDE4B/CHRNB4/LRRTM3/CD44/COL1A1/FAS/LIX1/NOL4/ZFP82/LRRC4C/HDAC9/KCND2/CSRNP3/CD274/SOGA3/TNFAIP6/PCYT1B/SEMA3A/MEGF10	45
KAYO_AGING_MUSCLE_UP	KAYO_AGING_MUSCLE_UP	29/1154	241/20738	7.84192e-05	0.000807045	0.000593862	KCNMA1/PTGIS/TACR2/SELP/ELANE/PENK/FRZB/RAB33A/LTBP2/ITGB3/SGCB/AIF1/CCL2/CD40LG/RELN/MYO1F/PDE4B/RTN1/DPYD/CD83/CALCRL/CD3D/MEP1B/ENPEP/GDF5/SCG2/CALB2/COL10A1/MLC1	29
ZHAN_EARLY_DIFFERENTIATION_GENES_DN	ZHAN_EARLY_DIFFERENTIATION_GENES_DN	10/1154	42/20738	7.86351e-05	0.000807045	0.000593862	CD1C/RHOH/VCL/ETS1/SPI1/LTB/SPIB/CIITA/CXCR5/EGR3	10
BARIS_THYROID_CANCER_DN	BARIS_THYROID_CANCER_DN	12/1154	59/20738	8.18529e-05	0.000835441	0.000614757	COL8A1/VCL/BGN/MMP2/GATA3/TIMP1/CD40LG/TGFB1/CD44/CD2/INPP5D/CCND2	12
ZHENG_IL22_SIGNALING_UP	ZHENG_IL22_SIGNALING_UP	12/1154	59/20738	8.18529e-05	0.000835441	0.000614757	MS4A6A/TAC1/TIMP1/RTN1/FZD1/C3/CD14/HP/FREM1/CCL5/OLR1/CD38	12
BOQUEST_STEM_CELL_DN	BOQUEST_STEM_CELL_DN	27/1154	218/20738	8.36065e-05	0.000850995	0.000626203	CDC42EP3/LRMP/ZNF385D/SELP/LAPTM5/GIMAP4/THSD7A/SWAP70/PECAM1/ENG/CSF2RB/LHX6/AQP1/SRGN/CDH5/CD93/STX11/TFPI2/PCDH17/ABLIM3/APLNR/ALDH1A2/HLA-DPB1/HLA-DRA/CD74/HLA-DPA1/HLA-DQA1	27
AFFAR_YY1_TARGETS_DN	AFFAR_YY1_TARGETS_DN	30/1154	254/20738	8.38879e-05	0.000851519	0.000626589	FGF7/THBS4/PTGDS/GNB4/LUM/FCGR2B/EDNRA/THY1/VAV1/TAC1/GPR65/COL15A1/MS4A4A/COL6A3/DKK3/CCL2/ITGA4/CYP7B1/SLC4A10/BCAT1/CTSL/THBS2/TGFBI/MNDA/FOLH1/CHST2/APOC1/SPP1/MATN2/DKK2	30
ROZANOV_MMP14_TARGETS_UP	ROZANOV_MMP14_TARGETS_UP	31/1154	267/20738	8.87568e-05	0.00089848	0.000661145	MYLK/CALD1/FCRLA/RGS4/LAMA4/LPXN/IGFBP7/HEG1/FRMD6/PCOLCE/ANGPTL2/PIK3CD/GLIPR1/SOD3/FKBP7/SRPX2/PDGFRL/COL5A1/HTRA3/FN1/CD83/COL4A2/PXDN/CEND1/HLA-DMB/HLA-DPB1/CHST15/CST7/CCND2/MATN2/MEGF10	31
BIOCARTA_CLASSIC_PATHWAY	BIOCARTA_CLASSIC_PATHWAY	6/1154	15/20738	9.49356e-05	0.000955805	0.000703327	C4A/C4B/C3/C1QA/C1QC/C1QB	6
BIOCARTA_IL17_PATHWAY	BIOCARTA_IL17_PATHWAY	6/1154	15/20738	9.49356e-05	0.000955805	0.000703327	CD4/CD3G/CD3D/CD2/CD3E/IL6	6
KEGG_ANTIGEN_PROCESSING_AND_PRESENTATION	KEGG_ANTIGEN_PROCESSING_AND_PRESENTATION	15/1154	88/20738	9.56931e-05	0.000960821	0.000707018	LTA/CD4/CTSL/HLA-DQA2/HLA-DMB/CIITA/HLA-DPB1/KIR2DS4/HLA-DRA/HLA-DOA/KIR3DL2/CD74/HLA-DPA1/KIR3DL1/HLA-DQA1	15
AKL_HTLV1_INFECTION_DN	AKL_HTLV1_INFECTION_DN	13/1154	69/20738	9.626e-05	0.000963901	0.000709285	MEF2C/MDFIC/STAP1/PRUNE2/IGFBP7/GPR65/PECAM1/PMCH/PKIA/TRAV8-3/CD3G/CD86/CD96	13
JOSEPH_RESPONSE_TO_SODIUM_BUTYRATE_DN	JOSEPH_RESPONSE_TO_SODIUM_BUTYRATE_DN	12/1154	60/20738	9.71931e-05	0.000970046	0.000713806	FSTL1/EMP3/THBS4/A2M/ELANE/CDH11/THSD7A/ELK3/COL6A3/CD300C/AQP1/IL6	12
HAHTOLA_SEZARY_SYNDROM_DN	HAHTOLA_SEZARY_SYNDROM_DN	10/1154	43/20738	9.73974e-05	0.000970046	0.000713806	BCL2/GZMK/MYBL1/KLRB1/KIR2DS4/CCL5/KIR3DL2/KIR3DL1/CTSW/NKG7	10
WANG_ESOPHAGUS_CANCER_VS_NORMAL_UP	WANG_ESOPHAGUS_CANCER_VS_NORMAL_UP	18/1154	119/20738	0.000101314	0.00100635	0.000740518	LUM/IGFBP7/LAPTM5/TSPAN18/THY1/COL3A1/C4A/COL6A3/PECAM1/CCR7/SPARC/MYADM/CSF2RB/SRGN/FN1/COL5A2/ITGAM/MMP7	18
NAKAMURA_CANCER_MICROENVIRONMENT_UP	NAKAMURA_CANCER_MICROENVIRONMENT_UP	8/1154	28/20738	0.000102584	0.00101624	0.000747801	COL3A1/ZBTB20/TRAV27/COL1A2/COL1A1/POSTN/APOE/LAMP5	8
YAUCH_HEDGEHOG_SIGNALING_PARACRINE_UP	YAUCH_HEDGEHOG_SIGNALING_PARACRINE_UP	20/1154	141/20738	0.00010722	0.00105933	0.000779505	BCHE/MS4A1/SPON1/EPHA3/PENK/FRZB/TSPAN11/SCG5/SPOCK1/GLI2/ALDH1A3/WNT9B/RELN/ADD2/BST1/BRINP3/CCL22/SPIC/CCR9/COL10A1	20
INGRAM_SHH_TARGETS_DN	INGRAM_SHH_TARGETS_DN	12/1154	61/20738	0.00011494	0.00112958	0.000831198	TUBA1A/SFRP2/SPARC/NREP/VCAN/COL1A1/C3/CALCRL/TGFBI/POU3F1/CAV2/MEGF10	12
ISSAEVA_MLL2_TARGETS	ISSAEVA_MLL2_TARGETS	12/1154	61/20738	0.00011494	0.00112958	0.000831198	FLRT2/FSTL1/AXL/A2M/LMO1/LOXL1/C5AR1/COL5A1/PPP2R2B/PCDH7/HDAC9/NPR3	12
CUI_TCF21_TARGETS_UP	CUI_TCF21_TARGETS_UP	9/1154	36/20738	0.000119166	0.00116801	0.00085948	LUM/PENK/COL3A1/ISLR/LHFPL2/CYP7B1/VCAN/FAP/CCND2	9
WESTON_VEGFA_TARGETS	WESTON_VEGFA_TARGETS	16/1154	100/20738	0.000123529	0.00120759	0.000888602	MGP/THY1/BGN/COL6A3/MMP2/CCL2/COL5A1/COL1A2/ADD2/VCAN/PDE4B/FAP/TFPI2/ART4/POSTN/HTR2B	16
BASSO_CD40_SIGNALING_DN	BASSO_CD40_SIGNALING_DN	13/1154	71/20738	0.000130522	0.00126925	0.000933975	KCNN3/CD27/AIF1/TRAC/SLC2A5/SH2B2/CSF2RB/NCF1/GRAP/LTB/ARL4C/HDAC9/CD38	13
WAMUNYOKOLI_OVARIAN_CANCER_GRADES_1_2_DN	WAMUNYOKOLI_OVARIAN_CANCER_GRADES_1_2_DN	13/1154	71/20738	0.000130522	0.00126925	0.000933975	FLRT2/ATP2B4/C4A/BASP1/RGL1/DOCK11/DAB2/DPYD/C3/SULF1/MNDA/WT1/TIAM1	13
BIOCARTA_CSK_PATHWAY	BIOCARTA_CSK_PATHWAY	7/1154	22/20738	0.000132134	0.00127489	0.000938123	PTPRC/CD4/CD3G/CD3D/CD3E/LCK/HLA-DRA	7
BIOCARTA_CTLA4_PATHWAY	BIOCARTA_CTLA4_PATHWAY	7/1154	22/20738	0.000132134	0.00127489	0.000938123	CD28/CD3G/CD86/CD3D/CD3E/LCK/HLA-DRA	7
GAVIN_PDE3B_TARGETS	GAVIN_PDE3B_TARGETS	7/1154	22/20738	0.000132134	0.00127489	0.000938123	SYT11/FGL2/ENTPD1/EBI3/TGFB1/NCF1/CYBB	7
CHIARADONNA_NEOPLASTIC_TRANSFORMATION_KRAS_CDC25_DN	CHIARADONNA_NEOPLASTIC_TRANSFORMATION_KRAS_CDC25_DN	11/1154	53/20738	0.000132871	0.00127867	0.000940907	CCDC80/MGP/LAMA4/TNC/VCAM1/LTBP2/LOXL1/LOX/LXN/FAS/C3	11
MCBRYAN_PUBERTAL_TGFB1_TARGETS_UP	MCBRYAN_PUBERTAL_TGFB1_TARGETS_UP	22/1154	166/20738	0.000138121	0.00132574	0.000975546	MEF2C/CALD1/CNN1/DPYSL3/ACTG2/PCOLCE/TNC/COL8A1/TIMP2/CDH11/BASP1/ETS1/HTRA1/MMP2/F2R/CRIM1/DKK3/VCAN/FN1/GJA1/CD14/TNFAIP6	22
ROSS_AML_WITH_MLL_FUSIONS	ROSS_AML_WITH_MLL_FUSIONS	14/1154	81/20738	0.000138995	0.00133038	0.000978955	MEF2C/LY86/LRMP/MBNL1/LGALS1/ALOX5AP/SRGN/CTSL/RNASE2/CCL5/FCGR1A/APOC2/RNASE3/NKG7	14
BROWNE_HCMV_INFECTION_20HR_DN	BROWNE_HCMV_INFECTION_20HR_DN	16/1154	101/20738	0.000139322	0.00133038	0.000978955	FILIP1L/SYT11/LPP/LTBP1/AXL/RGS4/CAP2/MBNL1/BICC1/VCL/SRPX2/F2R/COL1A2/LILRA1/PDE4B/LRRC15	16
BROWNE_HCMV_INFECTION_48HR_DN	BROWNE_HCMV_INFECTION_48HR_DN	47/1154	483/20738	0.000144742	0.00137517	0.00101192	BCHE/SGCD/FLNA/HSPB6/ECM2/MAP1B/MDFIC/EMP3/LPP/PRUNE2/MYH11/SSPN/CORO1A/FCMR/FOLR2/GJC1/CD1E/P2RY10/IGFBP4/LTBP2/GZMK/PDGFRL/ABCA4/CXCL13/MSC/LOX/AGTR2/PLXNC1/MMP16/MOXD1/ITGA4/C3AR1/FAP/MICAL2/SH2D1A/FN1/PIGCP1/ITGB2/SULF1/GJA1/POSTN/THBS2/TGFBI/SPP1/ADAMTS2/MATN2/PYY	47
LEE_LIVER_CANCER_HEPATOBLAST	LEE_LIVER_CANCER_HEPATOBLAST	6/1154	16/20738	0.000144755	0.00137517	0.00101192	VIM/TNC/TIMP1/CD44/IL6/CCND2	6
KEGG_TOLL_LIKE_RECEPTOR_SIGNALING_PATHWAY	KEGG_TOLL_LIKE_RECEPTOR_SIGNALING_PATHWAY	16/1154	102/20738	0.000156845	0.00148622	0.00109363	TLR6/PIK3CG/TLR7/TLR9/PIK3CD/TLR1/CTSK/LY96/TLR4/IL12B/CD86/CD14/CCL5/TLR8/SPP1/IL6	16
VERRECCHIA_EARLY_RESPONSE_TO_TGFB1	VERRECCHIA_EARLY_RESPONSE_TO_TGFB1	11/1154	54/20738	0.000158565	0.00149411	0.00109944	LAMA4/COL3A1/COL6A3/SPARC/NOTCH2/TIMP1/COL1A2/VCAN/CD44/FN1/ITGB2	11
PID_BCR_5PATHWAY	PID_BCR_5PATHWAY	12/1154	63/20738	0.000158888	0.00149411	0.00109944	CD79B/POU2F2/CD22/CD19/MAP4K1/FCGR2B/CD79A/PLCG2/CD72/PTPRC/ETS1/NFATC1	12
PID_IL12_2PATHWAY	PID_IL12_2PATHWAY	12/1154	63/20738	0.000158888	0.00149411	0.00109944	CD4/CCR5/CD3G/IL12B/CD3D/EOMES/CD3E/IL12RB1/LCK/JAK2/HLA-DRA/SOCS1	12
GRAESSMANN_RESPONSE_TO_MC_AND_SERUM_DEPRIVATION_UP	GRAESSMANN_RESPONSE_TO_MC_AND_SERUM_DEPRIVATION_UP	26/1154	215/20738	0.000165956	0.00155663	0.00114544	OGN/FSTL1/TACR2/IGFBP7/CDON/COL3A1/RBM43/BGN/KCTD12/SLC24A3/DKK3/CCL2/PDGFRB/AQP1/THEMIS2/FAS/C3/COL5A2/CD2/SLFN12L/MNDA/CXCR5/FCGR3A/SOCS1/CAPN6/KCNA6	26
REACTOME_GLYCOSAMINOGLYCAN_METABOLISM	REACTOME_GLYCOSAMINOGLYCAN_METABOLISM	18/1154	124/20738	0.000173167	0.00162016	0.00119219	OGN/KERA/LUM/OMD/CSGALNACT2/ARSB/GPC6/CHST11/BGN/SDC3/VCAN/CD44/CHSY3/CHST2/CHST15/GPC5/NDST4/HS3ST2	18
TURASHVILI_BREAST_DUCTAL_CARCINOMA_VS_LOBULAR_NORMAL_UP	TURASHVILI_BREAST_DUCTAL_CARCINOMA_VS_LOBULAR_NORMAL_UP	13/1154	73/20738	0.000174805	0.0016241	0.00119509	FBN1/COL3A1/SFRP4/EPB41L3/COL1A2/VCAN/FN1/COL1A1/SULF1/COL5A2/CTHRC1/COL10A1/LRRC15	13
DORSEY_GAB2_TARGETS	DORSEY_GAB2_TARGETS	8/1154	30/20738	0.000174903	0.0016241	0.00119509	ARHGAP25/ITGB3/COL6A3/SPARC/CD44/COL1A1/TFPI2/GRIK1	8
HOLLERN_SOLID_NODULAR_BREAST_TUMOR_DN	HOLLERN_SOLID_NODULAR_BREAST_TUMOR_DN	8/1154	30/20738	0.000174903	0.0016241	0.00119509	GLI3/TSPAN11/IGFBP4/LRRC8C/SPARC/AQP1/GJA1/TWIST1	8
TSENG_ADIPOGENIC_POTENTIAL_DN	TSENG_ADIPOGENIC_POTENTIAL_DN	10/1154	46/20738	0.000177877	0.00164759	0.00121237	FMO1/SFRP2/COL6A3/DKK3/RAMP2/NRP1/COL4A2/GJA1/TGFBI/CAPN6	10
REACTOME_INTERFERON_GAMMA_SIGNALING	REACTOME_INTERFERON_GAMMA_SIGNALING	15/1154	93/20738	0.00018165	0.00167834	0.001235	VCAM1/CD44/TRIM6/HLA-DQA2/HLA-DQB2/CIITA/HLA-DPB1/JAK2/HLA-DRA/SOCS1/GBP4/FCGR1A/HLA-DPA1/HLA-DQA1/GBP5	15
BIOCARTA_BBCELL_PATHWAY	BIOCARTA_BBCELL_PATHWAY	5/1154	11/20738	0.000184289	0.00169007	0.00124364	CD28/CD40LG/CD4/FAS/HLA-DRA	5
IIZUKA_LIVER_CANCER_EARLY_RECURRENCE	IIZUKA_LIVER_CANCER_EARLY_RECURRENCE	5/1154	11/20738	0.000184289	0.00169007	0.00124364	MEF2C/VIM/LAPTM5/HLA-DRA/CCND2	5
REACTOME_IRAK4_DEFICIENCY_TLR2_4	REACTOME_IRAK4_DEFICIENCY_TLR2_4	5/1154	11/20738	0.000184289	0.00169007	0.00124364	TLR6/TLR1/LY96/TLR4/CD14	5
YAMASHITA_METHYLATED_IN_PROSTATE_CANCER	YAMASHITA_METHYLATED_IN_PROSTATE_CANCER	12/1154	64/20738	0.000185779	0.00169889	0.00125012	EBF1/FCER2/AEBP1/C16orf54/SPARC/GPNMB/COL1A1/DYSF/LYPD8/SPP1/SYT16/MMP7	12
HAN_JNK_SINGALING_DN	HAN_JNK_SINGALING_DN	9/1154	38/20738	0.000186626	0.00169889	0.00125012	OGN/IGFBP4/ABCA1/FAS/C3/CD14/SEMA3C/SPIB/CD74	9
REACTOME_MOLECULES_ASSOCIATED_WITH_ELASTIC_FIBRES	REACTOME_MOLECULES_ASSOCIATED_WITH_ELASTIC_FIBRES	9/1154	38/20738	0.000186626	0.00169889	0.00125012	LTBP1/FBN1/FBLN2/LTBP2/ITGB3/TGFB1/FN1/TGFB2/GDF5	9
IWANAGA_CARCINOGENESIS_BY_KRAS_PTEN_DN	IWANAGA_CARCINOGENESIS_BY_KRAS_PTEN_DN	37/1154	355/20738	0.000188024	0.00170742	0.0012564	PDLIM3/OGN/CNN1/EBF1/ZEB1/PLXDC2/RHOJ/GNB4/SYNM/CNR2/ARHGAP25/CORO1A/GREM1/ANGPTL2/FMO1/CDON/ZFHX4/PTPRC/SELL/ABCD2/VCL/MS4A4A/BGN/CD28/MMP2/CXCL13/RAMP2/ENG/CD93/SV2B/CALCRL/CBR3/GLIS2/IRX1/ZNF728/PHEX/CAV2	37
MANALO_HYPOXIA_UP	MANALO_HYPOXIA_UP	25/1154	205/20738	0.000192548	0.00174423	0.00128349	RASSF2/FILIP1L/PTGIS/AXL/PLCG2/VEGFC/CD200/GJA5/ABCA1/BGN/SPOCK1/HTRA1/MMP2/LOX/DKK3/CXCR4/COL5A1/COL1A2/GPNMB/ARL4C/COL4A2/MN1/RRAS/TGFBI/CHST15	25
BAELDE_DIABETIC_NEPHROPATHY_DN	BAELDE_DIABETIC_NEPHROPATHY_DN	43/1154	435/20738	0.000194001	0.00175311	0.00129002	MYLK/CALD1/FLNA/FLRT2/DPYSL3/CDC42EP3/ECM2/AXL/FGF1/VIM/PTGDS/IGFBP7/PLCG2/COL3A1/THSD7A/CD200/GJA5/SPOCK1/CR1/HTRA1/LOXL1/F2R/AIF1/ZBTB20/LOX/CRIM1/TIMP1/VCAN/PTPN7/GPNMB/PDE4B/MXRA8/SPOCK2/SULF1/GJA1/POSTN/SEMA3C/ADORA1/WT1/CHST2/ENPEP/KCND3/WT1-AS	43
BROWNE_HCMV_INFECTION_18HR_DN	BROWNE_HCMV_INFECTION_18HR_DN	23/1154	182/20738	0.000202181	0.00182258	0.00134114	SGCD/MYLK/GLI3/PRKCB/PTGIS/AXL/SSPN/GREM1/ANGPTL2/CTSO/COL3A1/P2RY10/LOXL1/RAC2/MSC/VCAN/PDGFRB/GPR176/CD44/RRAS/SOCS1/ITGAM/ADAM12	23
GRAHAM_CML_DIVIDING_VS_NORMAL_QUIESCENT_DN	GRAHAM_CML_DIVIDING_VS_NORMAL_QUIESCENT_DN	15/1154	94/20738	0.0002052	0.00184084	0.00135458	CCL19/TCF4/CLEC2B/CTSO/EVI2A/PTPRC/CD200/GLIPR1/SELL/CXCL13/IFI16/PMCH/CD44/HLA-DPA1/HLA-DQA1	15
REACTOME_CLASS_B_2_SECRETIN_FAMILY_RECEPTORS	REACTOME_CLASS_B_2_SECRETIN_FAMILY_RECEPTORS	15/1154	94/20738	0.0002052	0.00184084	0.00135458	GNG2/GNB4/PTCH2/GNG13/DHH/GNGT2/RAMP2/WNT9B/FZD1/CALCRL/CYSLTR2/UCN3/GIP/ADGRE3/GCG	15
LEIN_MIDBRAIN_MARKERS	LEIN_MIDBRAIN_MARKERS	14/1154	84/20738	0.000207144	0.00185378	0.0013641	BNC2/PTGDS/ZFHX4/COL15A1/ANKRD55/AGTR2/GLRA3/VAT1L/CD83/BCAT1/AGT/PHLDA3/GPC5/GPR1	14
VANTVEER_BREAST_CANCER_BRCA1_DN	VANTVEER_BREAST_CANCER_BRCA1_DN	10/1154	47/20738	0.000214803	0.0019177	0.00141114	GLI3/PRKG1/CDH11/SFRP2/S1PR3/ITGBL1/CTSK/DKK3/MICAL2/LILRB1	10
GUTIERREZ_CHRONIC_LYMPHOCYTIC_LEUKEMIA_DN	GUTIERREZ_CHRONIC_LYMPHOCYTIC_LEUKEMIA_DN	11/1154	56/20738	0.000222753	0.0019744	0.00145286	FILIP1L/LPP/FCMR/FCER2/VASH1/CCR7/TRAC/SPOCK2/APOBEC3G/CCDC88A/LCK	11
LEE_TARGETS_OF_PTCH1_AND_SUFU_UP	LEE_TARGETS_OF_PTCH1_AND_SUFU_UP	11/1154	56/20738	0.000222753	0.0019744	0.00145286	ZEB1/C4A/PTCH2/GLI2/GPNMB/C1QA/TSHZ2/C1QB/CCND2/MYCN/HLA-DQA1	11
TONKS_TARGETS_OF_RUNX1_RUNX1T1_FUSION_MONOCYTE_DN	TONKS_TARGETS_OF_RUNX1_RUNX1T1_FUSION_MONOCYTE_DN	11/1154	56/20738	0.000222753	0.0019744	0.00145286	CD1C/FGL2/ENTPD1/ST8SIA4/CD1E/LDLRAD4/PLXNC1/LTB/ARL4C/ADAMDEC1/CLC	11
REACTOME_CONSTITUTIVE_SIGNALING_BY_ABERRANT_PI3K_IN_CANCER	REACTOME_CONSTITUTIVE_SIGNALING_BY_ABERRANT_PI3K_IN_CANCER	13/1154	75/20738	0.000231407	0.00204622	0.0015057	FGF7/FGF1/CD19/VAV1/PIK3CD/CD28/RAC2/FGF5/PDGFRB/TRAT1/CD86/LCK/NRG3	13
BERENJENO_TRANSFORMED_BY_RHOA_DN	BERENJENO_TRANSFORMED_BY_RHOA_DN	40/1154	399/20738	0.000239311	0.00211106	0.00155342	CCDC80/MGP/OGN/EBF1/LUM/TLR6/LAMA4/MAB21L2/SSPN/PCOLCE/TCF4/MRC2/AEBP1/PTPRCAP/SFRP2/PRNP/FKBP7/ISLR/COL6A3/SGCB/F2R/LOX/AGTR2/DKK3/COL5A1/COL1A2/PDGFRB/FN1/LXN/SERPINE2/COL1A1/FZD1/RRAS/NFIX/POSTN/THBS2/NPR3/TWIST1/MATN2/CAPN6	40
MISHRA_CARCINOMA_ASSOCIATED_FIBROBLAST_UP	MISHRA_CARCINOMA_ASSOCIATED_FIBROBLAST_UP	7/1154	24/20738	0.000243133	0.00212957	0.00156704	TNC/TMEM156/THY1/CTSK/CCL2/PDGFRB/CTHRC1	7
OSADA_ASCL1_TARGETS_DN	OSADA_ASCL1_TARGETS_DN	7/1154	24/20738	0.000243133	0.00212957	0.00156704	RASSF2/AXL/CRIM1/DKK3/CD44/SEMA3C/TGFBI	7
PID_TOLL_ENDOGENOUS_PATHWAY	PID_TOLL_ENDOGENOUS_PATHWAY	7/1154	24/20738	0.000243133	0.00212957	0.00156704	TLR6/TLR1/BGN/LY96/VCAN/TLR4/CD14	7
DAVICIONI_TARGETS_OF_PAX_FOXO1_FUSIONS_DN	DAVICIONI_TARGETS_OF_PAX_FOXO1_FUSIONS_DN	12/1154	66/20738	0.000251345	0.00219114	0.00161234	ATP2B4/ARHGAP15/TCF4/EDNRA/KCTD12/CCL2/MOXD1/PKIA/MICAL2/SPOCK2/TRIL/ADORA1	12
MARSON_FOXP3_TARGETS_UP	MARSON_FOXP3_TARGETS_UP	12/1154	66/20738	0.000251345	0.00219114	0.00161234	VIM/SH3BGRL/CORO1A/BASP1/ETS1/SWAP70/LRRC8C/RAC2/CD44/CD2/TIAM1/NKG7	12
DELASERNA_MYOD_TARGETS_DN	DELASERNA_MYOD_TARGETS_DN	11/1154	57/20738	0.000262315	0.0022814	0.00167876	GAPT/ADGRA2/S1PR3/BASP1/MS4A4A/MMP2/PDE4B/FZD1/POSTN/TGFBI/CAPN6	11
MARTIN_VIRAL_GPCR_SIGNALING_UP	MARTIN_VIRAL_GPCR_SIGNALING_UP	14/1154	86/20738	0.0002671	0.00231758	0.00170539	PLD4/BCL2/IGFBP7/GPR18/DOK6/SOD3/VCAM1/ARRDC5/CCL2/EPB41L3/LHX6/C3/MYH10/SPP1	14
CONCANNON_APOPTOSIS_BY_EPOXOMICIN_DN	CONCANNON_APOPTOSIS_BY_EPOXOMICIN_DN	22/1154	175/20738	0.000296633	0.00256782	0.00188952	KCNMA1/RGS13/RGS4/LUM/CHRNA3/PCOLCE/ELMO1/CDH11/LMO1/PDGFRL/CXCR4/NREP/TENM4/VCAN/RTN1/HDAC9/RPH3A/TWIST1/TNFAIP6/NELL1/TMSB15A/MYCN	22
GUTIERREZ_CHRONIC_LYMPHOCYTIC_LEUKEMIA_UP	GUTIERREZ_CHRONIC_LYMPHOCYTIC_LEUKEMIA_UP	5/1154	12/20738	0.000301454	0.00258539	0.00190245	CD1C/MS4A1/PLXNC1/ITGA4/CYBB	5
PARK_TRETINOIN_RESPONSE	PARK_TRETINOIN_RESPONSE	5/1154	12/20738	0.000301454	0.00258539	0.00190245	ALOX5AP/SLC2A5/NCF1/PLEK/CEBPE	5
SOUCEK_MYC_TARGETS	SOUCEK_MYC_TARGETS	5/1154	12/20738	0.000301454	0.00258539	0.00190245	CXCL13/CCL2/CCL21/CSF2RB/CCL5	5
YAGUE_PRETUMOR_DRUG_RESISTANCE_DN	YAGUE_PRETUMOR_DRUG_RESISTANCE_DN	5/1154	12/20738	0.000301454	0.00258539	0.00190245	CALD1/COL8A1/LTBP2/MMP2/VCAN	5
CORRE_MULTIPLE_MYELOMA_UP	CORRE_MULTIPLE_MYELOMA_UP	13/1154	77/20738	0.000303004	0.00259012	0.00190593	PTGIS/RHOJ/RGS4/NRXN3/CD200/PDGFRL/SLC24A3/ALDH1A3/RGS7BP/TLR4/TRAV8-3/SAMSN1/SCG2	13
KANG_AR_TARGETS_DN	KANG_AR_TARGETS_DN	6/1154	18/20738	0.000304802	0.00259012	0.00190593	FGF1/CTSK/COL1A2/TGFB1/COL1A1/SPP1	6
KARAKAS_TGFB1_SIGNALING	KARAKAS_TGFB1_SIGNALING	6/1154	18/20738	0.000304802	0.00259012	0.00190593	IGFBP7/MMP2/LOX/FAP/FN1/CST6	6
WEBER_METHYLATED_IN_COLON_CANCER	WEBER_METHYLATED_IN_COLON_CANCER	6/1154	18/20738	0.000304802	0.00259012	0.00190593	WWTR1/GATA3/WSCD2/TGFB2/SIAH3/ADAM12	6
RAMASWAMY_METASTASIS_DN	RAMASWAMY_METASTASIS_DN	11/1154	58/20738	0.000307642	0.00260827	0.00191929	MYLK/CNN1/MAP1B/ACTG2/MYH11/GREM1/RAB30/STAC/GP1BA/HLA-DPB1/PCDH11X	11
PID_INTEGRIN_A9B1_PATHWAY	PID_INTEGRIN_A9B1_PATHWAY	7/1154	25/20738	0.000321566	0.0027139	0.00199702	TNC/VEGFC/VCAM1/FN1/CSF2RA/SPP1/ADAM12	7
SCHLINGEMANN_SKIN_CARCINOGENESIS_TPA_DN	SCHLINGEMANN_SKIN_CARCINOGENESIS_TPA_DN	7/1154	25/20738	0.000321566	0.0027139	0.00199702	TMEM255A/AEBP1/CCL21/COL1A2/MXRA8/COL1A1/APOC1	7
BIDUS_METASTASIS_DN	BIDUS_METASTASIS_DN	20/1154	153/20738	0.000327951	0.0027615	0.00203204	ATP8B4/SASH3/CORO1A/FBXO32/MS4A6A/PLEKHA2/ACTN1/CLEC11A/PRRX1/RGL1/ZBTB20/ENG/DAB2/ITGAL/AQP1/SELPLG/HP/HLA-DRA/PHLDA3/LAMP5	20
ZHAN_MULTIPLE_MYELOMA_CD1_VS_CD2_UP	ZHAN_MULTIPLE_MYELOMA_CD1_VS_CD2_UP	12/1154	68/20738	0.000335605	0.00281954	0.00207475	KLHL4/MAP1B/CORO1A/TM6SF1/RAB31/LINC00900/RAB33A/KCNK12/P2RX7/ITGAL/PCDH18/LAMP5	12
CROONQUIST_NRAS_VS_STROMAL_STIMULATION_UP	CROONQUIST_NRAS_VS_STROMAL_STIMULATION_UP	9/1154	41/20738	0.000345094	0.0028732	0.00211424	SYNM/CX3CR1/RNASE6/ALOX5AP/SPI1/NCF1C/CYBB/SV2B/CD86	9
LIANG_HEMATOPOIESIS_STEM_CELL_NUMBER_LARGE_VS_TINY_UP	LIANG_HEMATOPOIESIS_STEM_CELL_NUMBER_LARGE_VS_TINY_UP	9/1154	41/20738	0.000345094	0.0028732	0.00211424	FCER1A/TUBA1A/GNB4/TLR6/DIO2/MSR1/SERPINE2/HLA-DMB/SLFN12L	9
PID_AMB2_NEUTROPHILS_PATHWAY	PID_AMB2_NEUTROPHILS_PATHWAY	9/1154	41/20738	0.000345094	0.0028732	0.00211424	SELP/THY1/TLN1/MMP2/ITGB2/SELPLG/LCK/ITGAM/IL6	9
REACTOME_DISEASES_ASSOCIATED_WITH_GLYCOSAMINOGLYCAN_METABOLISM	REACTOME_DISEASES_ASSOCIATED_WITH_GLYCOSAMINOGLYCAN_METABOLISM	9/1154	41/20738	0.000345094	0.0028732	0.00211424	OGN/KERA/LUM/OMD/GPC6/BGN/SDC3/VCAN/GPC5	9
KEGG_CALCIUM_SIGNALING_PATHWAY	KEGG_CALCIUM_SIGNALING_PATHWAY	22/1154	177/20738	0.000348351	0.00288752	0.00212478	MYLK/HTR2A/SLC8A1/PRKCB/ATP2B4/CYSLTR1/TACR2/PLCG2/TACR1/GRPR/EDNRA/NOS1/F2R/P2RX7/GRIN2A/PDGFRB/DRD5/BST1/CYSLTR2/HTR2B/CD38/GNA14	22
CERVERA_SDHB_TARGETS_1_UP	CERVERA_SDHB_TARGETS_1_UP	17/1154	120/20738	0.000348373	0.00288752	0.00212478	TUBA1A/RFTN1/FSTL1/PLXDC2/MAP1B/SH3BGRL/TMEM156/PIK3CD/SUCNR1/HTRA1/SGCB/GPX8/AQP1/COL1A1/LEFTY2/ARHGAP23/LYPD1	17
LIANG_SILENCED_BY_METHYLATION_UP	LIANG_SILENCED_BY_METHYLATION_UP	8/1154	33/20738	0.000357542	0.00294376	0.00216616	SCG5/ALDH1A3/AQP1/SRGN/C3/PAPPA/OLR1/CCND2	8
PID_IL12_STAT4_PATHWAY	PID_IL12_STAT4_PATHWAY	8/1154	33/20738	0.000357542	0.00294376	0.00216616	CD28/CD4/TGFB1/CD3G/CD86/CD3D/CD3E/HLA-DRA	8
REACTOME_ACTIVATION_OF_MATRIX_METALLOPROTEINASES	REACTOME_ACTIVATION_OF_MATRIX_METALLOPROTEINASES	8/1154	33/20738	0.000357542	0.00294376	0.00216616	ELANE/TIMP2/CTSK/MMP2/TIMP1/MMP16/CTRB1/MMP7	8
REACTOME_CHONDROITIN_SULFATE_DERMATAN_SULFATE_METABOLISM	REACTOME_CHONDROITIN_SULFATE_DERMATAN_SULFATE_METABOLISM	10/1154	50/20738	0.000366173	0.00300814	0.00221353	CSGALNACT2/ARSB/GPC6/CHST11/BGN/SDC3/VCAN/CHSY3/CHST15/GPC5	10
HADDAD_B_LYMPHOCYTE_PROGENITOR	HADDAD_B_LYMPHOCYTE_PROGENITOR	31/1154	289/20738	0.000368365	0.00301945	0.00222186	CD79B/MEF2C/VPREB3/MYLK/CD22/LRMP/CD19/MS4A1/CD79A/TCF4/CD72/FCMR/LAPTM5/AEBP1/ZNF423/CD27/PIK3CD/LDLRAD4/ELK3/BANK1/TCL1A/PAX5/CRIM1/CXCR4/COL5A1/DACT1/PXDN/TCL6/CIITA/CHST15/RASGRP1	31
KIM_WT1_TARGETS_12HR_UP	KIM_WT1_TARGETS_12HR_UP	21/1154	166/20738	0.000369909	0.00302541	0.00222624	SYNC/MYLK/CDC42EP3/ATP2B4/FGF1/PJA2/CHRNA3/HEG1/TMEM255A/THY1/GPR183/HTRA1/GLI2/MYBL1/DAB2/AQP1/NOX4/MN1/ADORA1/WT1/MYCN	21
CAIRO_HEPATOBLASTOMA_CLASSES_DN	CAIRO_HEPATOBLASTOMA_CLASSES_DN	25/1154	214/20738	0.000373934	0.0030516	0.00224551	MYLK/IGF1/ZEB1/CDC42EP3/HSPB6/FAT4/LPXN/SPON1/CX3CR1/CTSO/RAB33A/PLA2G4C/HTRA1/SGCB/ZBTB20/DKK3/ENG/KLRB1/CAMK1D/FAS/RRAS/HDAC9/LCK/ENPEP/RASGRF1	25
KEGG_COMPLEMENT_AND_COAGULATION_CASCADES	KEGG_COMPLEMENT_AND_COAGULATION_CASCADES	12/1154	69/20738	0.000385993	0.00314309	0.00231283	A2M/C4A/C4B/CR1/CR2/F2R/C5AR1/C3AR1/C3/C1QA/C1QC/C1QB	12
MOREAUX_MULTIPLE_MYELOMA_BY_TACI_UP	MOREAUX_MULTIPLE_MYELOMA_BY_TACI_UP	37/1154	369/20738	0.000401035	0.00325841	0.00239769	POU2F2/FLRT2/MOB3A/CD22/GNG2/CNR2/SCRG1/TACR1/NRP2/MRC2/KCNIP1/PIK3CD/REM1/NOS1/LTBP2/VGLL3/CR1/FXYD2/MSC/C3AR1/MXRA8/CHRNA6/HAMP/DRD5/SIGLEC7/GP1BA/HLA-DMB/CAMK1G/PTCRA/TIFAB/TNFAIP6/CALB2/PCDH11X/GRM7/BIRC7/HS3ST2/LRRC15	37
HOLLMANN_APOPTOSIS_VIA_CD40_UP	HOLLMANN_APOPTOSIS_VIA_CD40_UP	24/1154	203/20738	0.000407047	0.00330002	0.00242832	MEF2C/TUBA1A/RFTN1/KCNN3/CD22/LRMP/RGS13/EMP3/STAP1/LTBP1/MAP4K1/TBC1D1/ADAM19/VAV1/PTPRC/BASP1/SGCB/RAC2/MYBL1/SH2B2/CD86/MYH10/LCK/CD38	24
MULLIGHAN_MLL_SIGNATURE_1_UP	MULLIGHAN_MLL_SIGNATURE_1_UP	38/1154	383/20738	0.000414577	0.00335373	0.00246783	RASSF2/FLNA/CDC42EP3/LRMP/FCGR2B/IGFBP7/ATP8B4/MBNL1/LGALS1/LAPTM5/LAT2/RNASE6/EVI2A/IKZF1/LCP1/EVI2B/C1orf54/PECAM1/RAC2/CD300C/CXCR4/PLXNC1/LILRA1/SPI1/LST1/MYO1F/ITGB2/SELPLG/FCGR2A/CCR1/RNASE2/NLRP3/CSF2RA/LILRB4/PILRA/FCGR1A/RNASE3/NKG7	38
FOSTER_TOLERANT_MACROPHAGE_DN	FOSTER_TOLERANT_MACROPHAGE_DN	40/1154	410/20738	0.0004164	0.00336114	0.00247329	ZEB1/FILIP1L/GNB4/SHISA3/TNC/TCF4/SELP/TBC1D1/RHOH/PLEKHA2/IKZF1/CHST11/ADAP2/TNFSF8/VCAM1/TAGAP/F2R/ENG/VCAN/MYADM/PDE4B/CD83/FZD1/FAS/GJA1/IL12B/NFIX/CD86/MNDA/LCK/JAK2/CCL22/POU3F1/TIAM1/OLR1/SOCS1/GBP4/IL6/CCND2/AIM2	40
PID_UPA_UPAR_PATHWAY	PID_UPA_UPAR_PATHWAY	9/1154	42/20738	0.000417765	0.00336482	0.002476	ELANE/ITGB3/PDGFRB/TGFB1/FN1/ITGB2/FPR3/FPR1/ITGAM	9
PID_IL27_PATHWAY	PID_IL27_PATHWAY	7/1154	26/20738	0.000419053	0.00336788	0.00247824	EBI3/GATA3/TGFB1/IL12B/IL12RB1/JAK2/IL6	7
BIOCARTA_TOB1_PATHWAY	BIOCARTA_TOB1_PATHWAY	6/1154	19/20738	0.000424603	0.00339774	0.00250022	CD28/TGFB1/CD3G/CD3D/TGFB2/CD3E	6
REACTOME_SCAVENGING_BY_CLASS_A_RECEPTORS	REACTOME_SCAVENGING_BY_CLASS_A_RECEPTORS	6/1154	19/20738	0.000424603	0.00339774	0.00250022	COL3A1/MSR1/COL1A2/COL1A1/COL4A2/APOE	6
CHIBA_RESPONSE_TO_TSA_UP	CHIBA_RESPONSE_TO_TSA_UP	10/1154	51/20738	0.000433059	0.0034505	0.00253904	ARHGDIB/LUM/TIMP2/VEGFC/NGFR/SOD3/COL1A2/PDGFRB/TGFB1/CAV2	10
LIU_SMARCA4_TARGETS	LIU_SMARCA4_TARGETS	10/1154	51/20738	0.000433059	0.0034505	0.00253904	IGF1/PARVA/COL3A1/CD53/NOS1/TMEM130/MMP2/SPARC/CCL2/MKX	10
LINDVALL_IMMORTALIZED_BY_TERT_UP	LINDVALL_IMMORTALIZED_BY_TERT_UP	12/1154	70/20738	0.000442626	0.00351086	0.00258346	CALD1/RNF150/LUM/A2M/IGFBP7/EHD3/COL15A1/PDE5A/ARMC9/TSHZ1/MKX/UCHL1	12
YAGI_AML_WITH_T_8_21_TRANSLOCATION	YAGI_AML_WITH_T_8_21_TRANSLOCATION	37/1154	371/20738	0.000444698	0.00351086	0.00258346	POU2F2/PTGDS/SASH3/LGALS1/ELMO1/ELANE/LAPTM5/PTPRCAP/CD200/LCP1/BASP1/SWAP70/ROBO1/AIF1/LST1/TRAT1/JAK3/NCF1/SERPINE2/PXDN/NFIX/SELPLG/FCGR2A/HLA-DMB/FEV/CIITA/CXCR5/CD96/HLA-DPB1/SACS/HLA-DRA/LYPD1/CD74/HLA-DPA1/CAV2/HLA-DQA1/GIP	37
HAN_JNK_SINGALING_UP	HAN_JNK_SINGALING_UP	8/1154	34/20738	0.000444966	0.00351086	0.00258346	ZEB1/TNC/ANGPTL2/LOX/TGFBI/CCL5/GBP4/CCND2	8
VALK_AML_CLUSTER_6	VALK_AML_CLUSTER_6	8/1154	34/20738	0.000444966	0.00351086	0.00258346	DPYSL3/LTBP1/CORO1A/PECAM1/PIEZO2/HLA-DRA/CD74/HLA-DPA1	8
NEMETH_INFLAMMATORY_RESPONSE_LPS_UP	NEMETH_INFLAMMATORY_RESPONSE_LPS_UP	13/1154	80/20738	0.000445373	0.00351086	0.00258346	FCGR2B/MSR1/DAB2/MYADM/C3AR1/TGFB1/SRGN/CD44/LTB/BCL6B/SLFN12L/MNDA/LILRB4	13
PEDRIOLI_MIR31_TARGETS_DN	PEDRIOLI_MIR31_TARGETS_DN	40/1154	412/20738	0.000458943	0.00361016	0.00265653	SGCD/RASSF2/FLRT2/EBF1/PTGDS/CCIN/FGL2/KCNIP1/CTSO/FMNL1/LDLRAD4/PLA2G4C/VCAM1/GVINP1/ROBO1/ABCA4/P2RX7/CMTM3/RAMP2/MMP16/NRP1/PMCH/HTRA3/SPOCK2/SERPINE2/LTB/SCARF2/CD93/TFPI2/RASGRF2/DOK2/SV2B/FERMT3/IL34/MFRP/HLA-DOA/SPP1/FOXC2/PCDHA13/MMP7	40
SHEN_SMARCA2_TARGETS_DN	SHEN_SMARCA2_TARGETS_DN	33/1154	319/20738	0.000466399	0.003655	0.00268953	POU2F2/MAP1A/CD22/FGF1/CHRNA3/TLR6/LILRA4/SIT1/TNR/TNFSF8/PAX5/LTA/LILRA1/NFATC1/ADD2/PLEK/LZTS1/SEMA6B/TRGV3/SIGLEC7/KMO/TCL6/TSHZ2/PTCRA/GDF5/HLA-DOA/NLRP3/CALB2/KIR3DL2/GPR31/UPK2/TMPRSS15/ADGRE3	33
REACTOME_TRAFFICKING_AND_PROCESSING_OF_ENDOSOMAL_TLR	REACTOME_TRAFFICKING_AND_PROCESSING_OF_ENDOSOMAL_TLR	5/1154	13/20738	0.000467459	0.003655	0.00268953	TLR7/TLR9/CTSK/CTSL/TLR8	5
REACTOME_LEISHMANIA_INFECTION	REACTOME_LEISHMANIA_INFECTION	32/1154	306/20738	0.000467604	0.003655	0.00268953	GNG2/WIPF1/GNB4/CYSLTR1/WAS/PLCG2/NCKAP1L/ELMO1/ENTPD1/GPBAR1/VAV1/GNG13/GNGT2/P2RX7/RAMP2/C3AR1/GPR176/C3/DRD5/CD3G/CALCRL/FCGR2A/CYSLTR2/FCGR3A/IGHG4/NLRP3/FCGR1A/IGKV2D-30/IL6/GIP/IGKV4-1/GCG	32
LINDSTEDT_DENDRITIC_CELL_MATURATION_A	LINDSTEDT_DENDRITIC_CELL_MATURATION_A	11/1154	61/20738	0.000484972	0.00378278	0.00278355	TNC/ENTPD1/CD48/CCL2/RTN1/PLEK/LILRB1/TFEC/IL12B/CCL5/IL6	11
HORIUCHI_WTAP_TARGETS_UP	HORIUCHI_WTAP_TARGETS_UP	32/1154	307/20738	0.000494899	0.0038521	0.00283456	RFTN1/LPP/HMCN1/ITGA1/FBN1/ENTPD1/CDH11/RAB33A/PRNP/CD200/MAFB/VCAM1/GVINP1/ABCA1/AP1S2/SESN3/DKK3/CCL2/COL5A1/ITGA4/CRISPLD1/SERPINE2/TFPI2/TFEC/PCDH17/ART4/PAPPA/BST1/HTR2B/CD109/CHST2/GDF3	32
GOLDRATH_ANTIGEN_RESPONSE	GOLDRATH_ANTIGEN_RESPONSE	36/1154	360/20738	0.0005018	0.00389763	0.00286806	PLD4/LYL1/MDFIC/EMP3/SH3BGRL/MS4A1/PLCG2/FGL2/LGALS1/LAT2/EVI2A/KLRG1/SLC25A53/CD48/VCL/GZMK/SGCB/F2R/NRP1/ITGA4/MYADM/MYO1F/TYROBP/KLRB1/CD44/LXN/CCR5/C3/IL12RB1/RHD/CCL5/CXCR3/LILRB4/PDCD1/CD74/HLA-DQA1	36
MORI_PRE_BI_LYMPHOCYTE_DN	MORI_PRE_BI_LYMPHOCYTE_DN	13/1154	81/20738	0.000503945	0.0039061	0.00287429	CD79B/FCRLA/LY86/DTX1/CD22/CNR2/MS4A1/FCGR2B/CD72/PTPRC/SLC25A53/CD2/CD74	13
KONDO_PROSTATE_CANCER_WITH_H3K27ME3	KONDO_PROSTATE_CANCER_WITH_H3K27ME3	23/1154	194/20738	0.000511338	0.00395513	0.00291038	COL14A1/CLECL1/GPR88/PIK3CG/ELMO1/ENTPD1/RNASE6/TAC1/BRINP2/CXCR4/IKZF3/CD40LG/SULF1/TFEC/HLA-DQA2/CD86/CHAT/FAM216B/SIGLEC7/SIAH3/POSTN/SPIC/TMPRSS15	23
JISON_SICKLE_CELL_DISEASE_UP	JISON_SICKLE_CELL_DISEASE_UP	22/1154	182/20738	0.000513568	0.0039641	0.00291697	LYL1/EMP3/AXL/CLIC2/SELP/ELANE/NGFR/ITGB3/LHFPL2/RGL1/TIMP1/NREP/FN1/PLEK/CTSL/TFEC/ABLIM3/RNASE2/PTCRA/JAK2/CEBPE/FCGR1A	22
REACTOME_INTERLEUKIN_RECEPTOR_SHC_SIGNALING	REACTOME_INTERLEUKIN_RECEPTOR_SHC_SIGNALING	7/1154	27/20738	0.000538767	0.00414996	0.00305374	PIK3CD/CSF2RB/JAK3/INPP5D/JAK2/CSF2RA/IL5	7
HERNANDEZ_MITOTIC_ARREST_BY_DOCETAXEL_1_UP	HERNANDEZ_MITOTIC_ARREST_BY_DOCETAXEL_1_UP	8/1154	35/20738	0.000548961	0.00421359	0.00310056	BCHE/EMP3/LIX1L/TACR1/VEGFC/CCL21/AGT/SPP1	8
LI_INDUCED_T_TO_NATURAL_KILLER_DN	LI_INDUCED_T_TO_NATURAL_KILLER_DN	18/1154	136/20738	0.000549303	0.00421359	0.00310056	DTX1/PLD4/PRKCB/ARHGAP15/CD27/ACTN1/FAM78A/ETS1/BGN/MMP2/LOX/COL5A1/CD6/SH2D1A/C3/CD3D/ART4/CD2	18
REACTOME_POTASSIUM_CHANNELS	REACTOME_POTASSIUM_CHANNELS	15/1154	103/20738	0.00056519	0.0043265	0.00318365	KCNN3/KCNMA1/GNG2/GNB4/ABCC9/KCNA1/GNG13/GNGT2/KCNA3/KCND2/KCND3/KCNK13/KCNC2/KCNK4/KCNA6	15
COATES_MACROPHAGE_M1_VS_M2_DN	COATES_MACROPHAGE_M1_VS_M2_DN	13/1154	82/20738	0.000568905	0.00434597	0.00319797	FLRT2/TLR1/CTSK/ITGB3/CD300C/AHNAK2/MYO1F/SH2B2/CTSL/BST1/C1QC/C1QB/UCHL1	13
BIOCARTA_COMP_PATHWAY	BIOCARTA_COMP_PATHWAY	6/1154	20/20738	0.000578181	0.00439869	0.00323677	C4A/C4B/C3/C1QA/C1QC/C1QB	6
REACTOME_CHONDROITIN_SULFATE_BIOSYNTHESIS	REACTOME_CHONDROITIN_SULFATE_BIOSYNTHESIS	6/1154	20/20738	0.000578181	0.00439869	0.00323677	CSGALNACT2/CHST11/BGN/VCAN/CHSY3/CHST15	6
KASLER_HDAC7_TARGETS_1_UP	KASLER_HDAC7_TARGETS_1_UP	22/1154	184/20738	0.000596691	0.00451657	0.00332351	RFTN1/FILIP1L/BCL2/SIT1/PIK3CD/IKZF1/LDLRAD4/GPR65/ELK3/ITGB3/CD28/P2RX7/SESN3/LTA/C3orf70/CCR4/CD6/TGFB1/DUSP10/CD96/CHST2/PDCD1	22
PID_CD8_TCR_PATHWAY	PID_CD8_TCR_PATHWAY	10/1154	53/20738	0.00059744	0.00451657	0.00332351	PRKCB/VAV1/PTPRC/CD28/CD3G/CD86/CD3D/CD3E/LCK/RASGRP1	10
BIOCARTA_TCR_PATHWAY	BIOCARTA_TCR_PATHWAY	9/1154	44/20738	0.00060099	0.00451657	0.00332351	PRKCB/PIK3CG/VAV1/NFATC1/PTPN7/CD3G/CD3D/CD3E/LCK	9
NAKAYAMA_FRA2_TARGETS	NAKAYAMA_FRA2_TARGETS	9/1154	44/20738	0.00060099	0.00451657	0.00332351	WIPF1/GPR18/FBXO32/CLEC2B/TAGAP/F2R/KLHDC7B/DUSP10/CHN1	9
PARENT_MTOR_SIGNALING_DN	PARENT_MTOR_SIGNALING_DN	9/1154	44/20738	0.00060099	0.00451657	0.00332351	CNN1/ADAM19/CNTN1/SPN/CD248/FGF5/SIGLEC7/PTCRA/ITGAM	9
TAKEDA_TARGETS_OF_NUP98_HOXA9_FUSION_6HR_DN	TAKEDA_TARGETS_OF_NUP98_HOXA9_FUSION_6HR_DN	9/1154	44/20738	0.00060099	0.00451657	0.00332351	PTPRC/CD200/TNFSF8/VASH1/P2RX7/CCL2/HTRA3/AQP1/CCR1	9
SMID_BREAST_CANCER_RELAPSE_IN_BONE_DN	SMID_BREAST_CANCER_RELAPSE_IN_BONE_DN	33/1154	324/20738	0.000613269	0.00459952	0.00338454	FLNA/RAB23/CD22/ACTG2/LTBP1/CD52/SYNM/WWTR1/SCRG1/MAP4K1/BAG2/BGN/NKX2-5/RAC2/CXCR4/IFI16/ADD2/KRT81/CD44/LEFTY2/ARL4C/COL4A2/NFIX/HLA-DQB2/SPIB/MUC16/FOLH1/TMSB15A/CAPN6/CHI3L2/IGKV4-1/UCHL1/MMP7	33
RORIE_TARGETS_OF_EWSR1_FLI1_FUSION_DN	RORIE_TARGETS_OF_EWSR1_FLI1_FUSION_DN	7/1154	28/20738	0.000684161	0.00512084	0.00376816	DCX/GATA3/NREP/LILRB1/FEV/SCG2/MYCN	7
MEISSNER_ES_ICP_WITH_H3K4ME3_AND_H3K27ME3	MEISSNER_ES_ICP_WITH_H3K4ME3_AND_H3K27ME3	5/1154	14/20738	0.00069395	0.00516868	0.00380336	LYL1/TNFRSF13C/CORO1A/TSPAN11/FOXS1	5
REACTOME_SEMA3A_PLEXIN_REPULSION_SIGNALING_BY_INHIBITING_INTEGRIN_ADHESION	REACTOME_SEMA3A_PLEXIN_REPULSION_SIGNALING_BY_INHIBITING_INTEGRIN_ADHESION	5/1154	14/20738	0.00069395	0.00516868	0.00380336	PLXNA4/TLN1/NRP1/RRAS/SEMA3A	5
MEISSNER_NPC_HCP_WITH_H3K4ME2	MEISSNER_NPC_HCP_WITH_H3K4ME2	45/1154	490/20738	0.000694737	0.00516868	0.00380336	SYNC/RFTN1/FLNC/DTX1/CPXM2/ZNF804A/CPXM1/LGI2/TM6SF1/AEBP1/HIC1/PLEKHA2/FBLN2/FMNL1/IKZF1/EBF2/NRK/ADAP2/KIAA1755/SPOCK1/ITGB3/BMP3/GATA3/ALDH1A3/LOX/OLFML2B/RAMP2/EPB41L3/SLITRK4/PCED1B/CD248/SPOCK2/RTN1/DYSF/CYS1/MN1/HHIPL1/ABLIM3/CNIH2/COL12A1/SLC37A2/RASGRP1/CALB2/C16orf74/NRG3	45
HOFFMANN_PRE_BI_TO_LARGE_PRE_BII_LYMPHOCYTE_DN	HOFFMANN_PRE_BI_TO_LARGE_PRE_BII_LYMPHOCYTE_DN	12/1154	74/20738	0.000744229	0.00552579	0.00406614	BCL2/FRMD6/GIMAP4/THY1/ACTN1/ENG/CSF2RB/LTB/SEMA7A/CCL5/TNFAIP6/CCND2	12
MCBRYAN_PUBERTAL_BREAST_3_4WK_UP	MCBRYAN_PUBERTAL_BREAST_3_4WK_UP	24/1154	212/20738	0.000762607	0.00565092	0.00415821	RASSF2/CNN1/MYH11/TNC/HACD4/COL8A1/FBXO32/EDNRA/MRC2/SGTB/BASP1/MAFB/SRPX2/GATA3/SLC2A5/CD248/FN1/CDH5/FZD1/GJA1/TRPS1/SPP1/APOC2/RNASE3	24
REACTOME_RHO_GTPASES_ACTIVATE_PAKS	REACTOME_RHO_GTPASES_ACTIVATE_PAKS	6/1154	21/20738	0.000771606	0.0056835	0.00418219	MYLK/FLNA/PPP1R12B/MYH11/PPP1R12A/MYH10	6
SPIELMAN_LYMPHOBLAST_EUROPEAN_VS_ASIAN_2FC_DN	SPIELMAN_LYMPHOBLAST_EUROPEAN_VS_ASIAN_2FC_DN	6/1154	21/20738	0.000771606	0.0056835	0.00418219	IGF1/CLEC2B/SLC2A5/PDE4B/ARL4C/CD38	6
VERRECCHIA_RESPONSE_TO_TGFB1_C2	VERRECCHIA_RESPONSE_TO_TGFB1_C2	6/1154	21/20738	0.000771606	0.0056835	0.00418219	COL3A1/COL6A3/TIMP1/COL1A2/FN1/ITGB2	6
KATSANOU_ELAVL1_TARGETS_DN	KATSANOU_ELAVL1_TARGETS_DN	18/1154	140/20738	0.000777927	0.00571869	0.00420809	PRG4/SGCD/THBS4/FGL2/ANGPTL2/SIGLEC10/AEBP1/SFRP2/TNN/IGFBP4/CXCR4/PLXNC1/CD44/PCP4L1/DUSP10/TGFBI/MNDA/TIAM1	18
REACTOME_NEURONAL_SYSTEM	REACTOME_NEURONAL_SYSTEM	39/1154	410/20738	0.00079581	0.00583856	0.00429629	BCHE/TUBA1A/KCNN3/KCNMA1/PRKCB/GNG2/GNB4/NRXN2/CHRNA3/ABCC9/NRXN3/KCNA1/GJC1/GNG13/GNGT2/GRIN2A/EPB41L3/GLRA3/SLITRK4/MAPT/CHRNB4/CHRNA6/LRRTM3/KCNA3/RASGRF2/SLC22A2/CHAT/IL1RAPL1/KCND2/GRIK1/KCND3/KCNK13/NLGN4X/KCNC2/SYN1/RASGRF1/KCNK4/SHANK1/KCNA6	39
SANA_TNF_SIGNALING_DN	SANA_TNF_SIGNALING_DN	13/1154	85/20738	0.000807718	0.00591422	0.00435197	RHOJ/ARHGDIB/RGS4/ZNF521/IGFBP4/BGN/PECAM1/KCTD12/ANTXR1/AHNAK2/LILRB1/CALCRL/POSTN	13
KOKKINAKIS_METHIONINE_DEPRIVATION_96HR_UP	KOKKINAKIS_METHIONINE_DEPRIVATION_96HR_UP	16/1154	118/20738	0.000837747	0.00611606	0.00450049	FGF7/LUM/IGFBP7/TIMP2/IGFBP4/BGN/MMP2/TIMP1/PDGFRB/DPYD/FZD1/FAS/GJA1/TGFB2/IL6/EGR3	16
KEGG_FC_GAMMA_R_MEDIATED_PHAGOCYTOSIS	KEGG_FC_GAMMA_R_MEDIATED_PHAGOCYTOSIS	14/1154	96/20738	0.000840579	0.00611606	0.00450049	PRKCB/WAS/FCGR2B/PIK3CG/PLCG2/VAV1/PIK3CD/PTPRC/RAC2/NCF1/FCGR2A/INPP5D/FCGR3A/FCGR1A	14
FIGUEROA_AML_METHYLATION_CLUSTER_5_DN	FIGUEROA_AML_METHYLATION_CLUSTER_5_DN	9/1154	46/20738	0.000845189	0.00611606	0.00450049	PLXNA4/CD48/MARVELD1/RGS7BP/ITGB2/CD3G/CD3D/TIAM1/AIM2	9
GRAHAM_CML_QUIESCENT_VS_NORMAL_QUIESCENT_DN	GRAHAM_CML_QUIESCENT_VS_NORMAL_QUIESCENT_DN	9/1154	46/20738	0.000845189	0.00611606	0.00450049	CD52/GLIPR1/SELL/AIF1/PMCH/HLA-DMB/HLA-DPB1/HLA-DPA1/HLA-DQA1	9
JAEGER_METASTASIS_UP	JAEGER_METASTASIS_UP	9/1154	46/20738	0.000845189	0.00611606	0.00450049	THBS4/TBC1D1/BGN/FN1/SULF1/SPP1/FCGR1A/ADAM12/UCHL1	9
MCDOWELL_ACUTE_LUNG_INJURY_DN	MCDOWELL_ACUTE_LUNG_INJURY_DN	9/1154	46/20738	0.000845189	0.00611606	0.00450049	MEOX2/FGF1/ANTXR1/EPB41L3/NRP1/MAPT/NFIX/APLNR/CHST2	9
VALK_AML_CLUSTER_16	VALK_AML_CLUSTER_16	7/1154	29/20738	0.00085896	0.0062036	0.0045649	MBNL1/PENK/C1orf54/ADD2/CD70/APOC2/LAMP5	7
REACTOME_TOLL_LIKE_RECEPTOR_CASCADES	REACTOME_TOLL_LIKE_RECEPTOR_CASCADES	19/1154	153/20738	0.000865644	0.00623971	0.00459148	MEF2C/LY86/TLR10/TLR6/PLCG2/TLR7/TLR9/CD180/TLR1/CTSK/LY96/TLR4/ITGB2/CTSL/BPI/CD14/TLR8/SOCS1/ITGAM	19
SASSON_RESPONSE_TO_GONADOTROPHINS_DN	SASSON_RESPONSE_TO_GONADOTROPHINS_DN	13/1154	86/20738	0.000903993	0.00649088	0.0047763	PDLIM3/TUBA1A/FLNC/ACTG2/AXL/RGS4/CAP2/TLN1/PIK3CD/ACTN1/VCL/DAB2/ARL4C	13
TAKEDA_TARGETS_OF_NUP98_HOXA9_FUSION_6HR_UP	TAKEDA_TARGETS_OF_NUP98_HOXA9_FUSION_6HR_UP	13/1154	86/20738	0.000903993	0.00649088	0.0047763	FGF7/FRMD6/P2RY12/EVI2A/GLIPR1/MS4A4A/PCDH17/TYRP1/CALCRL/KMO/SEMA3C/C3orf80/MMP7	13
KEGG_T_CELL_RECEPTOR_SIGNALING_PATHWAY	KEGG_T_CELL_RECEPTOR_SIGNALING_PATHWAY	15/1154	108/20738	0.00093591	0.00670705	0.00493537	PIK3CG/VAV1/PIK3CD/PTPRC/CD28/CD40LG/NFATC1/CD4/CD3G/CD3D/CD3E/LCK/RASGRP1/PDCD1/IL5	15
CAIRO_LIVER_DEVELOPMENT_UP	CAIRO_LIVER_DEVELOPMENT_UP	20/1154	166/20738	0.000941412	0.00673346	0.0049548	CYSLTR1/LPAR4/MAP4K1/ZNF423/GJC1/BASP1/CD248/LXN/SERPINE2/GJA1/PXDN/TGFB2/BNC1/TRPS1/COL5A2/CST6/WT1/MYCN/CAPN6/SEMA3A	20
VART_KSHV_INFECTION_ANGIOGENIC_MARKERS_DN	VART_KSHV_INFECTION_ANGIOGENIC_MARKERS_DN	17/1154	131/20738	0.000968267	0.0069122	0.00508632	IGF1/LPXN/EPHA3/NRP2/FRZB/MMP2/HEYL/NOTCH2/RAMP2/CCL2/PDGFRB/TGFB1/CDH5/FZD1/TGFB2/PHEX/ANPEP	17
REACTOME_SMOOTH_MUSCLE_CONTRACTION	REACTOME_SMOOTH_MUSCLE_CONTRACTION	8/1154	38/20738	0.000983531	0.00700766	0.00515657	MYLK/CALD1/ACTG2/MYH11/ITGA1/TLN1/VCL/DYSF	8
BIOCARTA_ASBCELL_PATHWAY	BIOCARTA_ASBCELL_PATHWAY	5/1154	15/20738	0.000993457	0.00702435	0.00516885	CD28/CD40LG/CD4/FAS/HLA-DRA	5
HAHTOLA_CTCL_PATHOGENESIS	HAHTOLA_CTCL_PATHOGENESIS	5/1154	15/20738	0.000993457	0.00702435	0.00516885	CD52/MS4A4A/CCL5/KIR3DL2/NKG7	5
MAHADEVAN_GIST_MORPHOLOGICAL_SWITCH	MAHADEVAN_GIST_MORPHOLOGICAL_SWITCH	5/1154	15/20738	0.000993457	0.00702435	0.00516885	ELMO1/SPOCK1/MMP2/TFPI2/SPP1	5
RAY_TARGETS_OF_P210_BCR_ABL_FUSION_DN	RAY_TARGETS_OF_P210_BCR_ABL_FUSION_DN	5/1154	15/20738	0.000993457	0.00702435	0.00516885	IGFBP7/PTPRCAP/AIF1/SRGN/RGS19	5
DAVICIONI_MOLECULAR_ARMS_VS_ERMS_DN	DAVICIONI_MOLECULAR_ARMS_VS_ERMS_DN	21/1154	179/20738	0.00100509	0.00709305	0.00521941	OLFML1/PARVA/EMP3/FAT4/GLT8D2/NRXN2/ADGRA2/ZFHX4/ISLR/PDGFRL/C1orf54/KCTD12/MMP2/RGL1/CD248/MAGEL2/LHX6/TRPS1/COL5A2/TRIL/CSRNP3	21
LEE_TARGETS_OF_PTCH1_AND_SUFU_DN	LEE_TARGETS_OF_PTCH1_AND_SUFU_DN	13/1154	87/20738	0.0010097	0.00711056	0.00523229	SLC8A1/PTGDS/NRXN3/PENK/THY1/TSPAN2/SPOCK2/SLC4A10/GJA1/CEND1/CNIH2/KCND2/NTM	13
MAHADEVAN_IMATINIB_RESISTANCE_UP	MAHADEVAN_IMATINIB_RESISTANCE_UP	6/1154	22/20738	0.00101141	0.00711056	0.00523229	AXL/GREM1/SPOCK1/CRIM1/DKK3/SERPINE2	6
REACTOME_MET_ACTIVATES_PTK2_SIGNALING	REACTOME_MET_ACTIVATES_PTK2_SIGNALING	7/1154	30/20738	0.00106715	0.00744835	0.00548085	LAMA4/COL3A1/COL5A1/COL1A2/FN1/COL1A1/COL5A2	7
SIMBULAN_PARP1_TARGETS_UP	SIMBULAN_PARP1_TARGETS_UP	7/1154	30/20738	0.00106715	0.00744835	0.00548085	MGP/FGF7/COL8A1/TIMP2/IGFBP4/SERPINE2/CCND2	7
TAKEDA_TARGETS_OF_NUP98_HOXA9_FUSION_3D_DN	TAKEDA_TARGETS_OF_NUP98_HOXA9_FUSION_3D_DN	7/1154	30/20738	0.00106715	0.00744835	0.00548085	FCGR2B/ENTPD1/MAFB/ETS1/CYP7B1/FCGR2A/TGFBI	7
FRIDMAN_SENESCENCE_UP	FRIDMAN_SENESCENCE_UP	12/1154	77/20738	0.00106951	0.00744835	0.00548085	FILIP1L/VIM/IGFBP7/RAB31/IGFBP4/SPARC/ALDH1A3/COL1A2/IFI16/CD44/FN1/RRAS	12
HELLEBREKERS_SILENCED_DURING_TUMOR_ANGIOGENESIS	HELLEBREKERS_SILENCED_DURING_TUMOR_ANGIOGENESIS	12/1154	77/20738	0.00106951	0.00744835	0.00548085	PDLIM3/CNN1/FILIP1/IGFBP7/FBN1/TSPAN2/DKK3/VCAN/SERPINE2/COL4A2/APOE/IL6	12
HELLER_HDAC_TARGETS_SILENCED_BY_METHYLATION_UP	HELLER_HDAC_TARGETS_SILENCED_BY_METHYLATION_UP	42/1154	459/20738	0.00110555	0.00768493	0.00565494	MEF2C/COL14A1/FLNA/TUBA1A/FAM49A/PRKCB/SYT11/EPHA3/FBN1/TAC1/PIK3CD/ITGBL1/MAFB/SWAP70/PDGFRL/KCTD12/ARMC9/GATA3/ALDH1A3/AHNAK2/TIMP1/MYBL1/MICAL2/MAPT/FN1/SERPINE2/C3/RRAS/TFPI2/TFEC/DAZL/RCN3/SPIB/APOE/HLA-DPB1/SYN1/SPP1/TMSB15A/HLA-DPA1/MYCN/HLA-DQA1/PYY	42
FAELT_B_CLL_WITH_VH_REARRANGEMENTS_UP	FAELT_B_CLL_WITH_VH_REARRANGEMENTS_UP	9/1154	48/20738	0.00116446	0.00806417	0.005934	TUBA1A/EMP3/FGL2/RAB31/DGKG/TLR1/ZBTB20/JAK2/EGR3	9
ZHAN_MULTIPLE_MYELOMA_MF_UP	ZHAN_MULTIPLE_MYELOMA_MF_UP	9/1154	48/20738	0.00116446	0.00806417	0.005934	TMEM255A/CX3CR1/RNASE6/SFRP2/SYNDIG1/TLR4/CD109/SPP1/TMPRSS15	9
MOHANKUMAR_HOXA1_TARGETS_DN	MOHANKUMAR_HOXA1_TARGETS_DN	20/1154	169/20738	0.00117666	0.00812615	0.00597961	SLC8A1/CD1C/MAP1B/ASPN/TNC/GPC6/ST8SIA4/PTCH2/MAFB/SPOCK1/SYNDIG1/DKK3/PKIA/LEFTY2/LILRB1/TYRP1/TRIL/MYCN/CYP19A1/SHANK1	20
SHIPP_DLBCL_CURED_VS_FATAL_UP	SHIPP_DLBCL_CURED_VS_FATAL_UP	8/1154	39/20738	0.0011778	0.00812615	0.00597961	MAP1B/CHRNA3/DRP2/FXYD2/ITGAD/LTA/HTR2B/MLC1	8
GARGALOVIC_RESPONSE_TO_OXIDIZED_PHOSPHOLIPIDS_GREY_DN	GARGALOVIC_RESPONSE_TO_OXIDIZED_PHOSPHOLIPIDS_GREY_DN	12/1154	78/20738	0.00120117	0.00827199	0.00608692	FLRT2/FAM49A/SHISA3/EVI2B/GJA5/GXYLT2/SESN3/CRISPLD1/GRAP/PCDH17/DUSP10/LYPD1	12
LEE_EARLY_T_LYMPHOCYTE_DN	LEE_EARLY_T_LYMPHOCYTE_DN	10/1154	58/20738	0.001243	0.00852838	0.00627559	EMP3/GIMAP4/GPR183/BTLA/CD27/ACTN1/CCR7/ANKRD55/SAMD3/CD44	10
REACTOME_SIGNALING_BY_PDGF	REACTOME_SIGNALING_BY_PDGF	10/1154	58/20738	0.001243	0.00852838	0.00627559	COL6A6/THBS4/COL3A1/COL6A3/COL5A1/PDGFRB/COL4A2/COL5A2/THBS2/SPP1	10
BROCKE_APOPTOSIS_REVERSED_BY_IL6	BROCKE_APOPTOSIS_REVERSED_BY_IL6	18/1154	146/20738	0.0012715	0.00870775	0.00640757	MYLK/POU2F2/ATP2B4/LRMP/MAP1B/LTBP1/HEG1/EVI2A/CD180/EVI2B/AP1S2/CXCR4/CCL2/CD44/CHST15/SOCS1/SPP1/CAV2	18
LEE_RECENT_THYMIC_EMIGRANT	LEE_RECENT_THYMIC_EMIGRANT	25/1154	233/20738	0.00129831	0.00887497	0.00653062	LPP/NAPSB/GNB4/CYSLTR1/HEG1/TCF4/TMEM156/TIMP2/MPEG1/RNASE6/CCR7/AIF1/GATA3/ANKRD55/NREP/IFI16/HOOK3/MICAL2/SH2D1A/RGS1/CD93/PXDN/HTR2B/CCR9/CHI3L2	25
BIOCARTA_TH1TH2_PATHWAY	BIOCARTA_TH1TH2_PATHWAY	6/1154	23/20738	0.00130454	0.00888479	0.00653786	CD28/CD40LG/IL12B/CD86/IL12RB1/HLA-DRA	6
PARK_TRETINOIN_RESPONSE_AND_RARA_PLZF_FUSION	PARK_TRETINOIN_RESPONSE_AND_RARA_PLZF_FUSION	6/1154	23/20738	0.00130454	0.00888479	0.00653786	ALOX5AP/SLC2A5/SPI1/NCF1/PLEK/CEBPE	6
BOQUEST_STEM_CELL_CULTURED_VS_FRESH_DN	BOQUEST_STEM_CELL_CULTURED_VS_FRESH_DN	7/1154	31/20738	0.00131298	0.00889319	0.00654403	IGF1/OGN/OMD/PDGFRL/C3/CD14/APOE	7
SCHRAETS_MLL_TARGETS_DN	SCHRAETS_MLL_TARGETS_DN	7/1154	31/20738	0.00131298	0.00889319	0.00654403	MGP/ARHGDIB/COL6A3/CD93/THBS2/TGFBI/FOXC2	7
WANG_IMMORTALIZED_BY_HOXA9_AND_MEIS1_UP	WANG_IMMORTALIZED_BY_HOXA9_AND_MEIS1_UP	7/1154	31/20738	0.00131298	0.00889319	0.00654403	RHOJ/ELANE/TLR4/TFEC/IGSF6/CSF2RA/CCND2	7
REACTOME_NUCLEOTIDE_LIKE_PURINERGIC_RECEPTORS	REACTOME_NUCLEOTIDE_LIKE_PURINERGIC_RECEPTORS	5/1154	16/20738	0.00137923	0.00932491	0.00686171	LPAR4/P2RY12/P2RY10/P2RY13/ADORA1	5
ZHENG_FOXP3_TARGETS_IN_THYMUS_UP	ZHENG_FOXP3_TARGETS_IN_THYMUS_UP	22/1154	196/20738	0.00138438	0.0093427	0.00687481	MDFIC/ARHGAP15/PIP4K2A/TESPA1/MBNL1/GPR18/GPR183/LDLRAD4/RAB8B/P2RY10/TLR1/ETS1/DOCK10/ELK3/CD28/SLAMF6/ZBTB20/CXCR4/CD84/PDE4B/TRAT1/RGS1	22
KRASNOSELSKAYA_ILF3_TARGETS_UP	KRASNOSELSKAYA_ILF3_TARGETS_UP	8/1154	40/20738	0.00140145	0.00940649	0.00692175	RGS4/OMD/CLEC2B/CTSO/IFI16/FAP/CST4/APOE	8
NABA_BASEMENT_MEMBRANES	NABA_BASEMENT_MEMBRANES	8/1154	40/20738	0.00140145	0.00940649	0.00692175	COL6A6/HMCN1/LAMA4/COL15A1/COL6A3/NTNG2/COL4A2/NTN3	8
XU_CREBBP_TARGETS_DN	XU_CREBBP_TARGETS_DN	8/1154	40/20738	0.00140145	0.00940649	0.00692175	FCER2/ETS1/MS4A4A/CCR7/ALDH1A3/LTA/TGFB1/CIITA	8
BEGUM_TARGETS_OF_PAX3_FOXO1_FUSION_UP	BEGUM_TARGETS_OF_PAX3_FOXO1_FUSION_UP	10/1154	59/20738	0.00142333	0.00950171	0.00699181	MDFIC/LTBP1/OMD/PLXNC1/DPYD/PCDH7/STX11/PCDH17/CALCRL/SEMA3C	10
HUTTMANN_B_CLL_POOR_SURVIVAL_DN	HUTTMANN_B_CLL_POOR_SURVIVAL_DN	10/1154	59/20738	0.00142333	0.00950171	0.00699181	MEF2C/DGKG/GLIPR1/BANK1/ZBTB20/TRAC/MYBL1/EGR3/ADAMDEC1/UTS2	10
SAMOLS_TARGETS_OF_KHSV_MIRNAS_DN	SAMOLS_TARGETS_OF_KHSV_MIRNAS_DN	10/1154	59/20738	0.00142333	0.00950171	0.00699181	BHLHE22/LDLRAD4/DKK3/IFI16/SRGN/CD44/FN1/LZTS1/SPP1/UCHL1	10
CHEBOTAEV_GR_TARGETS_DN	CHEBOTAEV_GR_TARGETS_DN	16/1154	124/20738	0.00143234	0.00954466	0.00702342	PDLIM3/FLRT2/TMEM255A/NRXN3/CLEC11A/CNTN1/NPTX1/LOXL1/COL1A2/PKIA/TGFB2/CHSY3/THBS2/KCTD4/GNA14/ARSI	16
ROSS_LEUKEMIA_WITH_MLL_FUSIONS	ROSS_LEUKEMIA_WITH_MLL_FUSIONS	12/1154	80/20738	0.0015049	0.0100102	0.00736596	IGFBP7/MBNL1/LGALS1/PTPRC/RAC2/LILRA1/DAB2/CCL5/CCND2/RNASE3/NKG7/LAMP5	12
MAINA_VHL_TARGETS_UP	MAINA_VHL_TARGETS_UP	4/1154	10/20738	0.00152811	0.0101282	0.00745281	CNN1/FILIP1L/NREP/DAB2	4
SHANK_TAL1_TARGETS_DN	SHANK_TAL1_TARGETS_DN	4/1154	10/20738	0.00152811	0.0101282	0.00745281	BCL2/CD4/CD6/PTCRA	4
CHUNG_BLISTER_CYTOTOXICITY_DN	CHUNG_BLISTER_CYTOTOXICITY_DN	9/1154	50/20738	0.00157467	0.010381	0.00763887	CDC42EP3/PRKCB/PLCG2/HACD4/SELL/VCL/BIN2/RGS18/MNDA	9
SASAI_RESISTANCE_TO_NEOPLASTIC_TRANSFROMATION	SASAI_RESISTANCE_TO_NEOPLASTIC_TRANSFROMATION	9/1154	50/20738	0.00157467	0.010381	0.00763887	FSTL1/PCOLCE/FBN1/FBLN2/LTBP2/BGN/PDGFRB/COL1A1/COL5A2	9
TSUNODA_CISPLATIN_RESISTANCE_DN	TSUNODA_CISPLATIN_RESISTANCE_DN	9/1154	50/20738	0.00157467	0.010381	0.00763887	FBN1/PDE3A/FOLR2/IGFBP4/FN1/C3/NPR3/CD74/HLA-DPA1	9
PID_AP1_PATHWAY	PID_AP1_PATHWAY	11/1154	70/20738	0.00159046	0.0104665	0.00770178	PENK/ETS1/CCL2/TIMP1/COL1A2/NFATC1/TGFB1/GJA1/AGT/IL5/IL6	11
PEPPER_CHRONIC_LYMPHOCYTIC_LEUKEMIA_UP	PEPPER_CHRONIC_LYMPHOCYTIC_LEUKEMIA_UP	7/1154	32/20738	0.00160091	0.0105166	0.00773864	IGFBP7/EPB41L3/LILRA1/AOAH/TYRP1/CD38/KIR3DL1	7
WORSCHECH_TUMOR_REJECTION_UP	WORSCHECH_TUMOR_REJECTION_UP	10/1154	60/20738	0.00162435	0.0106517	0.00783804	TLR6/TAGAP/MSR1/TLR4/MNDA/LCK/CCL22/CCL5/LILRB4/IL5	10
REACTOME_DISEASES_OF_IMMUNE_SYSTEM	REACTOME_DISEASES_OF_IMMUNE_SYSTEM	6/1154	24/20738	0.00165835	0.0108554	0.00798794	TLR10/TLR6/TLR1/LY96/TLR4/CD14	6
HINATA_NFKB_TARGETS_FIBROBLAST_UP	HINATA_NFKB_TARGETS_FIBROBLAST_UP	12/1154	81/20738	0.00167898	0.0109711	0.00807308	MAP1B/FGF1/VIM/GREM1/ETS1/SEZ6L/MSC/MYBL1/FGF5/FN1/CD83/IL6	12
EBAUER_TARGETS_OF_PAX3_FOXO1_FUSION_UP	EBAUER_TARGETS_OF_PAX3_FOXO1_FUSION_UP	22/1154	199/20738	0.00168367	0.0109824	0.00808135	SGCD/MEF2C/WWTR1/MYBPC2/LAT2/AEBP1/HIVEP3/DCX/MYBPH/IGFBP4/COL6A3/ARMC9/TRAC/AHNAK2/EPB41L3/SMPX/CCR5/COL1A1/PLEK/CALCRL/ABLIM3/ALDH1A2	22
KIM_MYCN_AMPLIFICATION_TARGETS_UP	KIM_MYCN_AMPLIFICATION_TARGETS_UP	13/1154	92/20738	0.00170564	0.0111061	0.00817242	FCER1A/LRMP/GREM1/ANGPTL2/RAB33A/AP1S2/RGL1/SESN3/LILRA1/TSHZ1/BCAT1/MYCN/TENM2	13
REACTOME_COMPLEMENT_CASCADE	REACTOME_COMPLEMENT_CASCADE	15/1154	115/20738	0.00178467	0.0116004	0.00853611	CD19/ELANE/C4A/C4B/CR1/CR2/C5AR1/C3AR1/C3/C1QA/C1QC/C1QB/IGHG4/IGKV2D-30/IGKV4-1	15
CASTELLANO_NRAS_TARGETS_UP	CASTELLANO_NRAS_TARGETS_UP	11/1154	71/20738	0.00178926	0.0116098	0.00854307	MGP/PENK/CLEC11A/KCTD12/RAMP2/SERPINE2/GJA1/MNDA/NPR3/ENPEP/PHLDA3	11
TAVOR_CEBPA_TARGETS_UP	TAVOR_CEBPA_TARGETS_UP	9/1154	51/20738	0.0018193	0.0117841	0.0086713	RAB31/PTPRC/GLIPR1/VCL/CXCR4/LST1/C3AR1/CCND2/MLC1	9
CROONQUIST_IL6_DEPRIVATION_UP	CROONQUIST_IL6_DEPRIVATION_UP	5/1154	17/20738	0.00186507	0.0119379	0.00878445	ECM2/FCER2/LEFTY2/ARL4C/LILRB1	5
HOLLERN_ADENOMYOEPITHELIAL_BREAST_TUMOR	HOLLERN_ADENOMYOEPITHELIAL_BREAST_TUMOR	5/1154	17/20738	0.00186507	0.0119379	0.00878445	MEF2C/MYLK/CNN1/ISLR/RELN	5
KANG_AR_TARGETS_UP	KANG_AR_TARGETS_UP	5/1154	17/20738	0.00186507	0.0119379	0.00878445	MMP2/COL5A1/COL4A2/TGFB2/PHEX	5
KORKOLA_TERATOMA_UP	KORKOLA_TERATOMA_UP	5/1154	17/20738	0.00186507	0.0119379	0.00878445	MGP/ARHGDIB/A2M/CLEC2B/CCND2	5
REACTOME_TNF_RECEPTOR_SUPERFAMILY_TNFSF_MEMBERS_MEDIATING_NON_CANONICAL_NF_KB_PATHWAY	REACTOME_TNF_RECEPTOR_SUPERFAMILY_TNFSF_MEMBERS_MEDIATING_NON_CANONICAL_NF_KB_PATHWAY	5/1154	17/20738	0.00186507	0.0119379	0.00878445	TNFRSF13C/LTA/CD40LG/TNFSF13B/LTB	5
ZHAN_LATE_DIFFERENTIATION_GENES_DN	ZHAN_LATE_DIFFERENTIATION_GENES_DN	5/1154	17/20738	0.00186507	0.0119379	0.00878445	LRMP/GPR183/RHOH/MYBL1/LCK	5
LANDIS_ERBB2_BREAST_TUMORS_324_DN	LANDIS_ERBB2_BREAST_TUMORS_324_DN	18/1154	151/20738	0.00186559	0.0119379	0.00878445	CCDC80/ZEB1/LYL1/FSTL1/LUM/ANGPTL2/PENK/COL3A1/COL6A3/HTRA1/COL5A1/NRP1/COL1A1/GJA1/POSTN/TGFBI/MRC1/HLA-DQA1	18
ROSS_ACUTE_MYELOID_LEUKEMIA_CBF	ROSS_ACUTE_MYELOID_LEUKEMIA_CBF	12/1154	82/20738	0.00186928	0.0119408	0.00878664	ATP2B4/WIPF1/CD52/MYH11/LAT2/ROBO1/SPARC/MN1/HLA-DMB/CIITA/HLA-DPB1/HLA-DPA1	12
WATANABE_RECTAL_CANCER_RADIOTHERAPY_RESPONSIVE_DN	WATANABE_RECTAL_CANCER_RADIOTHERAPY_RESPONSIVE_DN	13/1154	93/20738	0.00188398	0.012014	0.0088405	FLNA/LUM/ITGA1/PCOLCE/PPP1R12A/LGALS1/COL3A1/ACTN1/COL6A3/RAC2/COL1A2/COL5A2/THBS2	13
BARRIER_CANCER_RELAPSE_NORMAL_SAMPLE_UP	BARRIER_CANCER_RELAPSE_NORMAL_SAMPLE_UP	7/1154	33/20738	0.00193567	0.0122175	0.00899018	IGF1/LRMP/CLIC2/FAS/PYY/NDNF/GCG	7
FRIDMAN_IMMORTALIZATION_DN	FRIDMAN_IMMORTALIZATION_DN	7/1154	33/20738	0.00193567	0.0122175	0.00899018	FILIP1L/IGFBP7/IGFBP4/HTRA1/SPARC/ALDH1A3/IFI16	7
PID_INTEGRIN_A4B1_PATHWAY	PID_INTEGRIN_A4B1_PATHWAY	7/1154	33/20738	0.00193567	0.0122175	0.00899018	TLN1/VCAM1/ITGA4/FN1/CD14/THBS2/SPP1	7
REACTOME_GLUCAGON_TYPE_LIGAND_RECEPTORS	REACTOME_GLUCAGON_TYPE_LIGAND_RECEPTORS	7/1154	33/20738	0.00193567	0.0122175	0.00899018	GNG2/GNB4/GNG13/GNGT2/CYSLTR2/GIP/GCG	7
ROZANOV_MMP14_TARGETS_SUBSET	ROZANOV_MMP14_TARGETS_SUBSET	7/1154	33/20738	0.00193567	0.0122175	0.00899018	CALD1/LAMA4/ANGPTL2/COL5A1/FN1/COL4A2/MATN2	7
ZHAN_LATE_DIFFERENTIATION_GENES_UP	ZHAN_LATE_DIFFERENTIATION_GENES_UP	7/1154	33/20738	0.00193567	0.0122175	0.00899018	IGF1/EMP3/BCL2/PECAM1/ITGA4/SELPLG/CAV2	7
PAPASPYRIDONOS_UNSTABLE_ATEROSCLEROTIC_PLAQUE_DN	PAPASPYRIDONOS_UNSTABLE_ATEROSCLEROTIC_PLAQUE_DN	8/1154	42/20738	0.00194925	0.0122614	0.00902254	MYLK/CPED1/MAP1B/PTGIS/MYH11/SOD3/CRIM1/GJA1	8
REACTOME_NCAM1_INTERACTIONS	REACTOME_NCAM1_INTERACTIONS	8/1154	42/20738	0.00194925	0.0122614	0.00902254	COL6A6/ST8SIA4/COL3A1/PRNP/COL6A3/COL5A1/COL4A2/COL5A2	8
REACTOME_RHO_GTPASE_CYCLE	REACTOME_RHO_GTPASE_CYCLE	17/1154	140/20738	0.00201863	0.0126763	0.00932784	RHOJ/ARHGAP15/ARHGDIB/A2M/ARHGAP25/ARHGAP31/VAV1/RHOH/ARHGAP30/TAGAP/ARHGAP22/RAC2/RASGRF2/SYDE2/CHN1/ARHGAP23/TIAM1	17
KEGG_HYPERTROPHIC_CARDIOMYOPATHY_HCM	KEGG_HYPERTROPHIC_CARDIOMYOPATHY_HCM	12/1154	83/20738	0.00207691	0.0129418	0.00952323	SGCD/IGF1/SLC8A1/ITGA1/CACNA2D1/ITGB3/SGCB/ITGA4/TGFB1/TGFB2/ITGA11/IL6	12
REACTOME_POST_TRANSLATIONAL_MODIFICATION_SYNTHESIS_OF_GPI_ANCHORED_PROTEINS	REACTOME_POST_TRANSLATIONAL_MODIFICATION_SYNTHESIS_OF_GPI_ANCHORED_PROTEINS	13/1154	94/20738	0.00207743	0.0129418	0.00952323	LSAMP/CD52/THY1/FOLR2/NTNG2/LYPD8/PRND/OTOA/ART4/BST1/CD109/NTM/LYPD1	13
LU_TUMOR_ANGIOGENESIS_UP	LU_TUMOR_ANGIOGENESIS_UP	6/1154	25/20738	0.00208049	0.0129418	0.00952323	CXCR4/VCAN/CD44/TNFAIP6/SPP1/CCND2	6
PID_LYMPH_ANGIOGENESIS_PATHWAY	PID_LYMPH_ANGIOGENESIS_PATHWAY	6/1154	25/20738	0.00208049	0.0129418	0.00952323	ITGA1/VEGFC/COL1A2/ITGA4/FN1/COL1A1	6
VILIMAS_NOTCH1_TARGETS_DN	VILIMAS_NOTCH1_TARGETS_DN	6/1154	25/20738	0.00208049	0.0129418	0.00952323	TREML1/LRRC25/TREM2/ITGB2/CSF2RA/ITGAM	6
WANG_RESPONSE_TO_GSK3_INHIBITOR_SB216763_UP	WANG_RESPONSE_TO_GSK3_INHIBITOR_SB216763_UP	36/1154	390/20738	0.00208187	0.0129418	0.00952323	IGF1/LY86/PRKCB/PLXDC2/CD37/ARHGAP15/MAP4K1/ATP8B4/FGL2/ELMO1/SNX29P1/HACD4/SIGLEC10/TIMP2/SCIMP/MS4A7/EVI2A/NCAM2/PTPRC/SGTB/EVI2B/CD48/TLR1/LHFPL2/ALOX5AP/SESN3/CXCR4/CD84/CD4/TNFSF13B/KIAA0825/ZNF366/NLRC4/SLC37A2/CD74/NKG7	36
LINDGREN_BLADDER_CANCER_CLUSTER_1_DN	LINDGREN_BLADDER_CANCER_CLUSTER_1_DN	35/1154	378/20738	0.00226324	0.0140457	0.0103355	MGP/MYLK/RASSF2/PPP1R12B/TUBA1A/EBF1/MAP1A/FILIP1L/ARHGAP15/LAMA4/TNC/LGALS1/NRP2/TIMP2/ADAM19/FBLN2/ACTN1/ARHGAP30/SELL/COL15A1/PDGFRL/PRRX1/RGL1/HEYL/DAB2/HTRA3/PDGFRB/COL4A2/CCL13/APLNR/PAPPA/COL5A2/FERMT3/FAM83D/IDO1	35
FOURNIER_ACINAR_DEVELOPMENT_LATE_UP	FOURNIER_ACINAR_DEVELOPMENT_LATE_UP	4/1154	11/20738	0.00229601	0.0142253	0.0104677	TCF4/MAFB/GPNMB/APOE	4
COLIN_PILOCYTIC_ASTROCYTOMA_VS_GLIOBLASTOMA_UP	COLIN_PILOCYTIC_ASTROCYTOMA_VS_GLIOBLASTOMA_UP	7/1154	34/20738	0.00232214	0.0143632	0.0105691	RASSF2/SCRG1/ANGPTL2/SPOCK1/HTRA1/DKK3/SERPINE2	7
WILCOX_RESPONSE_TO_PROGESTERONE_DN	WILCOX_RESPONSE_TO_PROGESTERONE_DN	10/1154	63/20738	0.00236892	0.0146281	0.0107641	MGP/ATP2B4/PECAM1/MMP2/COL1A2/MICAL2/FN1/COL1A1/COL5A2/NTM	10
PAPASPYRIDONOS_UNSTABLE_ATEROSCLEROTIC_PLAQUE_UP	PAPASPYRIDONOS_UNSTABLE_ATEROSCLEROTIC_PLAQUE_UP	9/1154	53/20738	0.00239937	0.0147915	0.0108843	NCKAP1L/MPEG1/MS4A4A/CD84/DAB2/CSF2RB/SRGN/SAMSN1/FCGR3A	9
SHETH_LIVER_CANCER_VS_TXNIP_LOSS_PAM5	SHETH_LIVER_CANCER_VS_TXNIP_LOSS_PAM5	14/1154	107/20738	0.00242717	0.014938	0.0109921	TNFRSF13C/RHOH/NGFR/SORCS2/LDLRAD4/NRK/EPYC/CTSL/ELAVL4/PAPPA/PI15/CHN1/KCND3/KCNK4	14
GAUSSMANN_MLL_AF4_FUSION_TARGETS_G_UP	GAUSSMANN_MLL_AF4_FUSION_TARGETS_G_UP	25/1154	244/20738	0.0024502	0.0150547	0.011078	IGF1/FAM49A/SYT11/PRKG1/FRRS1L/SELP/FBXO32/MS4A6A/CD48/DOCK10/DHH/SESN3/DOCK8/RELN/TSHZ1/MXRA8/SIX2/MAPT/C1QTNF5/C3/MUC16/MFRP/CRTAM/NDNF/UCHL1	25
BIOCARTA_CARDIACEGF_PATHWAY	BIOCARTA_CARDIACEGF_PATHWAY	5/1154	18/20738	0.00246518	0.0150718	0.0110905	PRKCB/EDNRA/AGTR2/AGT/ADAM12	5
TONKS_TARGETS_OF_RUNX1_RUNX1T1_FUSION_ERYTHROCYTE_DN	TONKS_TARGETS_OF_RUNX1_RUNX1T1_FUSION_ERYTHROCYTE_DN	5/1154	18/20738	0.00246518	0.0150718	0.0110905	MYLK/LTBP1/LDLRAD4/ARHGAP22/CLC	5
TONKS_TARGETS_OF_RUNX1_RUNX1T1_FUSION_GRANULOCYTE_DN	TONKS_TARGETS_OF_RUNX1_RUNX1T1_FUSION_GRANULOCYTE_DN	5/1154	18/20738	0.00246518	0.0150718	0.0110905	FCER1A/ENTPD1/ALOX5AP/NCF1/PILRA	5
KEGG_ARRHYTHMOGENIC_RIGHT_VENTRICULAR_CARDIOMYOPATHY_ARVC	KEGG_ARRHYTHMOGENIC_RIGHT_VENTRICULAR_CARDIOMYOPATHY_ARVC	11/1154	74/20738	0.00251017	0.0153215	0.0112743	SGCD/SLC8A1/ITGA1/CTNNA3/CACNA2D1/ACTN1/ITGB3/SGCB/ITGA4/GJA1/ITGA11	11
REACTOME_DISEASES_OF_GLYCOSYLATION	REACTOME_DISEASES_OF_GLYCOSYLATION	17/1154	143/20738	0.00253297	0.0154353	0.011358	OGN/KERA/ADAMTS16/LUM/OMD/SPON1/GPC6/THSD7A/BGN/SDC3/NOTCH2/VCAN/THSD7B/THBS2/MUC16/GPC5/ADAMTS2	17
SASSON_RESPONSE_TO_FORSKOLIN_DN	SASSON_RESPONSE_TO_FORSKOLIN_DN	12/1154	85/20738	0.00254884	0.0155065	0.0114104	PDLIM3/TUBA1A/FLNC/ACTG2/AXL/RGS4/CAP2/PIK3CD/ACTN1/VCL/DAB2/ARL4C	12
DAVIES_MULTIPLE_MYELOMA_VS_MGUS_DN	DAVIES_MULTIPLE_MYELOMA_VS_MGUS_DN	6/1154	26/20738	0.00257892	0.0156126	0.0114885	RNASE6/CD27/ACTN1/TLR1/VCL/LY96	6
FONTAINE_THYROID_TUMOR_UNCERTAIN_MALIGNANCY_DN	FONTAINE_THYROID_TUMOR_UNCERTAIN_MALIGNANCY_DN	6/1154	26/20738	0.00257892	0.0156126	0.0114885	PLCG2/FRZB/ITGA4/CD274/TWIST1/CD38	6
LI_CISPLATIN_RESISTANCE_UP	LI_CISPLATIN_RESISTANCE_UP	6/1154	26/20738	0.00257892	0.0156126	0.0114885	EPHA3/ZBTB20/GJA1/TFPI2/LILRB1/TWIST1	6
SCHAEFFER_PROSTATE_DEVELOPMENT_6HR_UP	SCHAEFFER_PROSTATE_DEVELOPMENT_6HR_UP	18/1154	156/20738	0.00267802	0.0161861	0.0119105	OGN/PRKCB/ASPN/RHOJ/CTSO/MS4A6A/TAC1/LY96/CXCL13/DOCK11/CD300C/FAP/TYROBP/LHX6/FNDC1/TREM2/ATRNL1/ADAMTS2	18
ALONSO_METASTASIS_EMT_UP	ALONSO_METASTASIS_EMT_UP	7/1154	35/20738	0.00276544	0.0165524	0.0121801	TUBA1A/LUM/CX3CR1/MMP2/SPARC/VCAN/FZD1	7
FRASOR_RESPONSE_TO_ESTRADIOL_UP	FRASOR_RESPONSE_TO_ESTRADIOL_UP	7/1154	35/20738	0.00276544	0.0165524	0.0121801	RAB31/IGFBP4/EPB41L3/MYBL1/MAPT/RASGRP1/EGR3	7
GYORFFY_MITOXANTRONE_RESISTANCE	GYORFFY_MITOXANTRONE_RESISTANCE	7/1154	35/20738	0.00276544	0.0165524	0.0121801	RASSF8/AMOTL1/SFRP4/TSHZ1/ELAVL4/IRX1/TENM2	7
KEGG_PRION_DISEASES	KEGG_PRION_DISEASES	7/1154	35/20738	0.00276544	0.0165524	0.0121801	NCAM2/PRNP/C1QA/C1QC/C1QB/CCL5/IL6	7
REACTOME_GPVI_MEDIATED_ACTIVATION_CASCADE	REACTOME_GPVI_MEDIATED_ACTIVATION_CASCADE	7/1154	35/20738	0.00276544	0.0165524	0.0121801	PIK3CG/PLCG2/VAV1/RAC2/COL1A2/COL1A1/LCK	7
VALK_AML_CLUSTER_9	VALK_AML_CLUSTER_9	7/1154	35/20738	0.00276544	0.0165524	0.0121801	CD1C/MYH11/FCGR2B/SPARC/NRP1/MN1/TGFBI	7
REACTOME_PLATELET_HOMEOSTASIS	REACTOME_PLATELET_HOMEOSTASIS	12/1154	86/20738	0.00281557	0.0168253	0.0123808	SLC8A1/KCNMA1/GNG2/ATP2B4/PRKG1/GNB4/GNG13/NOS1/PDE5A/PECAM1/GNGT2/P2RX7	12
KIM_GERMINAL_CENTER_T_HELPER_UP	KIM_GERMINAL_CENTER_T_HELPER_UP	10/1154	65/20738	0.0030019	0.0179099	0.013179	LPP/GIMAP4/ST8SIA4/ETS1/AP1S2/CXCL13/CD84/SH2D1A/MYH10/CHI3L2	10
LI_WILMS_TUMOR_VS_FETAL_KIDNEY_1_UP	LI_WILMS_TUMOR_VS_FETAL_KIDNEY_1_UP	20/1154	183/20738	0.00305041	0.0181701	0.0133704	MYLK/AXL/IGFBP7/PLCG2/CTSO/PRNP/THSD7A/KCTD12/RGL1/CRIM1/COL1A2/DAB2/MXRA8/CDH5/SEMA3C/APOE/ENPEP/SPP1/CAV2/MATN2	20
FIGUEROA_AML_METHYLATION_CLUSTER_1_DN	FIGUEROA_AML_METHYLATION_CLUSTER_1_DN	8/1154	45/20738	0.00307213	0.0182701	0.013444	CD48/MARVELD1/TLR1/SEZ6L/LHFPL2/AHNAK2/NLRC4/LILRB1	8
SAFFORD_T_LYMPHOCYTE_ANERGY	SAFFORD_T_LYMPHOCYTE_ANERGY	12/1154	87/20738	0.00310451	0.018433	0.0135639	LPAR4/ANGPTL2/TAGAP/SFRP4/F2R/CD40LG/NFATC1/JAK3/SRGN/STX11/AGT/LILRB4	12
REACTOME_NEGATIVE_REGULATION_OF_THE_PI3K_AKT_NETWORK	REACTOME_NEGATIVE_REGULATION_OF_THE_PI3K_AKT_NETWORK	14/1154	110/20738	0.0031437	0.0186359	0.0137132	FGF7/FGF1/CD19/PIP4K2A/VAV1/PIK3CD/CD28/RAC2/FGF5/PDGFRB/TRAT1/CD86/LCK/NRG3	14
SHARMA_PILOCYTIC_ASTROCYTOMA_LOCATION_UP	SHARMA_PILOCYTIC_ASTROCYTOMA_LOCATION_UP	6/1154	27/20738	0.00316182	0.0187133	0.0137701	LUM/GPC6/ZFHX4/MSR1/LY96/APOBEC3G	6
DUNNE_TARGETS_OF_AML1_MTG8_FUSION_DN	DUNNE_TARGETS_OF_AML1_MTG8_FUSION_DN	5/1154	19/20738	0.00319396	0.0187636	0.0138071	MEF2C/ELK3/IFI16/SAMSN1/ADAM12	5
GENTLES_LEUKEMIC_STEM_CELL_DN	GENTLES_LEUKEMIC_STEM_CELL_DN	5/1154	19/20738	0.00319396	0.0187636	0.0138071	RNASE2/CCL5/CD38/RNASE3/CLC	5
REACTOME_PLASMA_LIPOPROTEIN_ASSEMBLY	REACTOME_PLASMA_LIPOPROTEIN_ASSEMBLY	5/1154	19/20738	0.00319396	0.0187636	0.0138071	A2M/ABCA1/APOE/APOC1/APOC2	5
REACTOME_REGULATION_OF_TLR_BY_ENDOGENOUS_LIGAND	REACTOME_REGULATION_OF_TLR_BY_ENDOGENOUS_LIGAND	5/1154	19/20738	0.00319396	0.0187636	0.0138071	TLR6/TLR1/LY96/TLR4/CD14	5
TSENG_IRS1_TARGETS_DN	TSENG_IRS1_TARGETS_DN	16/1154	134/20738	0.00319564	0.0187636	0.0138071	FRMD6/FMO1/SFRP2/COL3A1/IGFBP4/COL6A3/DKK3/RAMP2/NRP1/DAB2/HTRA3/COL4A2/GJA1/CCDC88A/TGFBI/CAPN6	16
OUELLET_CULTURED_OVARIAN_CANCER_INVASIVE_VS_LMP_DN	OUELLET_CULTURED_OVARIAN_CANCER_INVASIVE_VS_LMP_DN	7/1154	36/20738	0.00327081	0.0191453	0.0140881	GLI3/FLNA/MAP1A/AEBP1/MMP2/FEV/CCR9	7
BIOCARTA_CELL2CELL_PATHWAY	BIOCARTA_CELL2CELL_PATHWAY	4/1154	12/20738	0.00329329	0.0191453	0.0140881	CTNNA3/ACTN1/VCL/PECAM1	4
REACTOME_CD28_DEPENDENT_VAV1_PATHWAY	REACTOME_CD28_DEPENDENT_VAV1_PATHWAY	4/1154	12/20738	0.00329329	0.0191453	0.0140881	VAV1/CD28/CD86/LCK	4
REACTOME_GP1B_IX_V_ACTIVATION_SIGNALLING	REACTOME_GP1B_IX_V_ACTIVATION_SIGNALLING	4/1154	12/20738	0.00329329	0.0191453	0.0140881	FLNA/COL1A2/COL1A1/GP1BA	4
REACTOME_P2Y_RECEPTORS	REACTOME_P2Y_RECEPTORS	4/1154	12/20738	0.00329329	0.0191453	0.0140881	LPAR4/P2RY12/P2RY10/P2RY13	4
REACTOME_PECAM1_INTERACTIONS	REACTOME_PECAM1_INTERACTIONS	4/1154	12/20738	0.00329329	0.0191453	0.0140881	ITGB3/PECAM1/INPP5D/LCK	4
RIZKI_TUMOR_INVASIVENESS_3D_UP	RIZKI_TUMOR_INVASIVENESS_3D_UP	22/1154	210/20738	0.00329682	0.0191453	0.0140881	FILIP1L/RGS13/PIP4K2A/TNC/CD72/LILRA4/COL3A1/RHOH/RAB33A/TAC1/IKZF1/GLIPR1/SOD3/CXCL13/NREP/COL1A2/ART4/GRIK1/NPR3/CPA1/HLA-DPA1/CTRB1	22
YAGI_AML_WITH_11Q23_REARRANGED	YAGI_AML_WITH_11Q23_REARRANGED	32/1154	345/20738	0.00331595	0.0192263	0.0141476	CD79B/MEF2C/PRKCB/LRMP/BCL2/LUM/CD79A/PLCG2/MBNL1/LGALS1/LAPTM5/ENTPD1/AEBP1/PIK3CD/LCP1/AP1S2/ELK3/TCL1A/ALOX5AP/JAK3/CYBB/NFIX/RGS19/SEMA3C/HDAC9/RNASE2/IL9R/NPR3/FCGR1A/CCND2/PCYT1B/ANPEP	32
GAJATE_RESPONSE_TO_TRABECTEDIN_UP	GAJATE_RESPONSE_TO_TRABECTEDIN_UP	10/1154	66/20738	0.00336534	0.0194821	0.0143359	TUBA1A/IGFBP7/CXCR4/GPNMB/SRGN/CD44/MYH10/TGFBI/IL6/CYP19A1	10
ZHOU_INFLAMMATORY_RESPONSE_FIMA_DN	ZHOU_INFLAMMATORY_RESPONSE_FIMA_DN	27/1154	277/20738	0.00340697	0.0196582	0.0144654	FGF7/ECM2/DOK3/LRMP/PRICKLE1/WIPF1/TLR10/TLR6/MAP4K1/NRXN3/FBXO32/CLEC2B/MS4A6A/EHD3/FAM78A/TLR1/CD300LB/PDE5A/SLAMF6/CXCR4/DAB2/TSHZ1/ZNF366/NLRC4/MYH10/MUC16/CPNE6	27
SHEDDEN_LUNG_CANCER_GOOD_SURVIVAL_A12	SHEDDEN_LUNG_CANCER_GOOD_SURVIVAL_A12	30/1154	318/20738	0.00341598	0.0196582	0.0144654	KCNN3/BCL2/CD19/CD79A/CD180/RHOH/CHST11/NPPC/BASP1/NOS1/TCL1A/PAX5/SLC2A5/KRT81/THEMIS2/NCR3/SIGLEC5/SLC22A2/LZTS1/LAX1/TPSG1/CHST2/KIR3DL2/CD38/CCND2/PCYT1B/ADAMDEC1/GPR31/IGHV3-20/IGKV4-1	30
HUMMERICH_SKIN_CANCER_PROGRESSION_UP	HUMMERICH_SKIN_CANCER_PROGRESSION_UP	12/1154	88/20738	0.00341697	0.0196582	0.0144654	CPXM1/SSPN/VCAM1/COL6A3/COL1A2/CD44/COL1A1/DOK2/COL5A2/THBS2/SOCS1/APOC2	12
SCHLESINGER_METHYLATED_DE_NOVO_IN_CANCER	SCHLESINGER_METHYLATED_DE_NOVO_IN_CANCER	12/1154	88/20738	0.00341697	0.0196582	0.0144654	BCL2/PRKG1/FBN1/HIC1/NPTX1/PAX5/CD44/WT1/POU3F1/PCDH11X/WT1-AS/EGR3	12
SEKI_INFLAMMATORY_RESPONSE_LPS_UP	SEKI_INFLAMMATORY_RESPONSE_LPS_UP	11/1154	77/20738	0.00344943	0.0198142	0.0145802	NGFR/VCAM1/SH3PXD2B/PRRX1/CCL2/CD44/FAS/STX11/SLC15A3/GBP4/EGR3	11
FIGUEROA_AML_METHYLATION_CLUSTER_1_UP	FIGUEROA_AML_METHYLATION_CLUSTER_1_UP	15/1154	123/20738	0.00345846	0.0198353	0.0145957	VPREB3/HTR2A/FSTL1/FCRLB/CLIC2/DOK6/SCG5/GSN-AS1/PCDHGA5/KRT81/LILRB1/SYDE2/WT1/WT1-AS/GDF3	15
MULLIGHAN_MLL_SIGNATURE_2_DN	MULLIGHAN_MLL_SIGNATURE_2_DN	27/1154	278/20738	0.0035794	0.0204972	0.0150828	STAP1/MYH11/ELMO1/PTPRCAP/RHOH/CD1E/CD200/LHFPL2/MMP2/SLC24A3/SPARC/LOXL1/LRRN2/IFI16/DAB2/SERPINE2/CETP/MN1/BCAT1/CD3D/LAX1/MRC1/CD96/NPR3/KIR3DL2/EGR3/TEX11	27
CASORELLI_ACUTE_PROMYELOCYTIC_LEUKEMIA_UP	CASORELLI_ACUTE_PROMYELOCYTIC_LEUKEMIA_UP	19/1154	173/20738	0.00361922	0.0206932	0.0152271	ATP2B4/PTGDS/ARHGAP25/IGFBP7/CSGALNACT2/FCMR/MRC2/GPR183/EVI2A/CHST11/GLIPR1/AP1S2/TCL1A/TIMP1/CD44/CD3D/CD96/AFF2/CTSW	19
RICKMAN_TUMOR_DIFFERENTIATED_MODERATELY_VS_POORLY_UP	RICKMAN_TUMOR_DIFFERENTIATED_MODERATELY_VS_POORLY_UP	15/1154	124/20738	0.00373728	0.0213353	0.0156995	ECM2/GLT8D2/FBN1/CPZ/COL3A1/CTSK/SRPX2/SH3PXD2B/OLFML2B/DPYD/COL5A2/MFRP/ADAMTS2/ADAM12/LRRC15	15
BEIER_GLIOMA_STEM_CELL_DN	BEIER_GLIOMA_STEM_CELL_DN	10/1154	67/20738	0.00376287	0.0214483	0.0157827	TIMP2/LAPTM5/NXPE3/BASP1/GPNMB/HLA-DMB/HLA-DRA/CD74/HLA-DPA1/HLA-DQA1	10
BURTON_ADIPOGENESIS_8	BURTON_ADIPOGENESIS_8	11/1154	78/20738	0.00381855	0.0216096	0.0159014	OGN/FGF7/PTGIS/EMP3/MSN/RAB31/VCAM1/VCL/F2R/CMTM3/LOX	11
COLIN_PILOCYTIC_ASTROCYTOMA_VS_GLIOBLASTOMA_DN	COLIN_PILOCYTIC_ASTROCYTOMA_VS_GLIOBLASTOMA_DN	6/1154	28/20738	0.00383754	0.0216096	0.0159014	A2M/PRRX1/GPNMB/FN1/TGFBI/SPP1	6
LOPES_METHYLATED_IN_COLON_CANCER_UP	LOPES_METHYLATED_IN_COLON_CANCER_UP	6/1154	28/20738	0.00383754	0.0216096	0.0159014	PENK/HIC1/ITGA4/TWIST1/SOCS1/CCND2	6
RORIE_TARGETS_OF_EWSR1_FLI1_FUSION_UP	RORIE_TARGETS_OF_EWSR1_FLI1_FUSION_UP	6/1154	28/20738	0.00383754	0.0216096	0.0159014	MDFIC/EMP3/HTRA1/DAB2/MN1/CCND2	6
SCHLESINGER_H3K27ME3_IN_NORMAL_AND_METHYLATED_IN_CANCER	SCHLESINGER_H3K27ME3_IN_NORMAL_AND_METHYLATED_IN_CANCER	6/1154	28/20738	0.00383754	0.0216096	0.0159014	KCNA1/SFRP4/COL1A1/SOCS1/GRM7/HS3ST2	6
MATTIOLI_MULTIPLE_MYELOMA_WITH_14Q32_TRANSLOCATIONS	MATTIOLI_MULTIPLE_MYELOMA_WITH_14Q32_TRANSLOCATIONS	7/1154	37/20738	0.00384366	0.0216096	0.0159014	VPREB3/CX3CR1/MAFB/TLR4/CYBB/PXDN/CCND2	7
PID_FRA_PATHWAY	PID_FRA_PATHWAY	7/1154	37/20738	0.00384366	0.0216096	0.0159014	MGP/MMP2/CCL2/COL1A2/NFATC1/GJA1/IL6	7
PID_IL23_PATHWAY	PID_IL23_PATHWAY	7/1154	37/20738	0.00384366	0.0216096	0.0159014	CCL2/CD4/IL12B/CD3E/IL12RB1/JAK2/IL6	7
VERRECCHIA_DELAYED_RESPONSE_TO_TGFB1	VERRECCHIA_DELAYED_RESPONSE_TO_TGFB1	7/1154	37/20738	0.00384366	0.0216096	0.0159014	TNC/COL8A1/IGFBP4/ITGB3/MMP2/ITGA4/THBS2	7
REACTOME_CARDIAC_CONDUCTION	REACTOME_CARDIAC_CONDUCTION	16/1154	137/20738	0.00398497	0.0223702	0.0164611	SLC8A1/ATP2B4/WWTR1/ABCC9/CLIC2/KCNIP1/CACNA2D1/KCNK12/NPPC/NOS1/NKX2-5/FXYD2/KCND2/KCND3/KCNK13/KCNK4	16
DAVICIONI_PAX_FOXO1_SIGNATURE_IN_ARMS_DN	DAVICIONI_PAX_FOXO1_SIGNATURE_IN_ARMS_DN	5/1154	20/20738	0.00406588	0.0226528	0.016669	TCF4/CCL2/MOXD1/PKIA/TRIL	5
MASRI_RESISTANCE_TO_TAMOXIFEN_AND_AROMATASE_INHIBITORS_UP	MASRI_RESISTANCE_TO_TAMOXIFEN_AND_AROMATASE_INHIBITORS_UP	5/1154	20/20738	0.00406588	0.0226528	0.016669	MGP/MYBL1/SULF1/GJA1/ATRNL1	5
REACTOME_DEFECTIVE_B4GALT7_CAUSES_EDS_PROGEROID_TYPE	REACTOME_DEFECTIVE_B4GALT7_CAUSES_EDS_PROGEROID_TYPE	5/1154	20/20738	0.00406588	0.0226528	0.016669	GPC6/BGN/SDC3/VCAN/GPC5	5
REACTOME_INFLAMMASOMES	REACTOME_INFLAMMASOMES	5/1154	20/20738	0.00406588	0.0226528	0.016669	BCL2/P2RX7/NLRC4/NLRP3/AIM2	5
XU_HGF_SIGNALING_NOT_VIA_AKT1_48HR_DN	XU_HGF_SIGNALING_NOT_VIA_AKT1_48HR_DN	5/1154	20/20738	0.00406588	0.0226528	0.016669	IGFBP7/FXYD2/CD248/LILRB1/SPP1	5
MEISSNER_NPC_HCP_WITH_H3K4ME2_AND_H3K27ME3	MEISSNER_NPC_HCP_WITH_H3K4ME2_AND_H3K27ME3	32/1154	350/20738	0.00411921	0.0229154	0.0168623	BNC2/FAM43B/PENK/CDH11/KCNA1/IGSF21/KCNK12/FAM78A/LTBP2/MSC/WNT9B/DOCK8/IKZF3/SIX2/VAT1L/CPNE5/TGFB1/LHX6/WSCD2/KCNA3/CHAT/BNC1/ALDH1A2/PAPPA/SEMA7A/FEV/NPR3/CBLN4/TMEM132E/ADAMTS2/FOXC2/RASGRF1	32
SATO_SILENCED_BY_METHYLATION_IN_PANCREATIC_CANCER_1	SATO_SILENCED_BY_METHYLATION_IN_PANCREATIC_CANCER_1	37/1154	421/20738	0.00415507	0.0230803	0.0169836	CD22/PARVA/CD52/CCL19/TESPA1/SPON1/RAB31/LAPTM5/MRC2/CD180/NGFR/CD200/CLEC11A/COL6A3/NPTX1/SPARC/PAX5/RAC2/LHX6/LXN/LTB/C3/PXDN/DUSP10/RCN3/CIITA/LCK/CCL22/CST2/CCL5/TWIST1/CCL17/CD74/WT1-AS/APOC2/UPK2/UCHL1	37
ZHONG_SECRETOME_OF_LUNG_CANCER_AND_ENDOTHELIUM	ZHONG_SECRETOME_OF_LUNG_CANCER_AND_ENDOTHELIUM	10/1154	68/20738	0.00419667	0.0232764	0.0171279	VIM/A2M/IGFBP7/IGFBP4/VCAM1/VCL/BGN/FN1/COL1A1/SPP1	10
GRESHOCK_CANCER_COPY_NUMBER_UP	GRESHOCK_CANCER_COPY_NUMBER_UP	30/1154	323/20738	0.00428119	0.0237097	0.0174467	LYL1/LPP/BCL2/MYH11/OMD/FCGR2B/CDH11/RHOH/LMO1/IKZF1/LCP1/MAFB/TCL1A/PRRX1/PAX5/IL21R/PDGFRB/COL1A1/FAS/MN1/CHN1/TCL6/FEV/FCRL4/CIITA/LCK/WT1/JAK2/CCND2/MYCN	30
REACTOME_PI3K_AKT_SIGNALING_IN_CANCER	REACTOME_PI3K_AKT_SIGNALING_IN_CANCER	13/1154	102/20738	0.00428963	0.023721	0.0174551	FGF7/FGF1/CD19/VAV1/PIK3CD/CD28/RAC2/FGF5/PDGFRB/TRAT1/CD86/LCK/NRG3	13
HUANG_FOXA2_TARGETS_DN	HUANG_FOXA2_TARGETS_DN	7/1154	38/20738	0.00448949	0.0247892	0.0182411	ATP2B4/TNC/SPARC/KRT81/CD44/TGFBI/SPP1	7
BIOCARTA_IL5_PATHWAY	BIOCARTA_IL5_PATHWAY	4/1154	13/20738	0.00454922	0.0248964	0.01832	CD4/HLA-DRA/IL5/IL6	4
GUTIERREZ_WALDENSTROEMS_MACROGLOBULINEMIA_2	GUTIERREZ_WALDENSTROEMS_MACROGLOBULINEMIA_2	4/1154	13/20738	0.00454922	0.0248964	0.01832	GPR183/RNASE2/HLA-DPA1/CLC	4
HASINA_NOL7_TARGETS_UP	HASINA_NOL7_TARGETS_UP	4/1154	13/20738	0.00454922	0.0248964	0.01832	TIMP2/TIMP1/RTN1/CD70	4
MATZUK_EARLY_ANTRAL_FOLLICLE	MATZUK_EARLY_ANTRAL_FOLLICLE	4/1154	13/20738	0.00454922	0.0248964	0.01832	IGF1/NOS1/CCND2/PCYT1B	4
REACTOME_KERATAN_SULFATE_DEGRADATION	REACTOME_KERATAN_SULFATE_DEGRADATION	4/1154	13/20738	0.00454922	0.0248964	0.01832	OGN/KERA/LUM/OMD	4
WU_HBX_TARGETS_3_DN	WU_HBX_TARGETS_3_DN	4/1154	13/20738	0.00454922	0.0248964	0.01832	EBI3/TGFB1/WT1/IL6	4
ABE_VEGFA_TARGETS_30MIN	ABE_VEGFA_TARGETS_30MIN	6/1154	29/20738	0.00461456	0.0250688	0.0184468	TAC1/GZMK/PCDH17/ELAVL4/APOE/EGR3	6
BIOCARTA_INFLAM_PATHWAY	BIOCARTA_INFLAM_PATHWAY	6/1154	29/20738	0.00461456	0.0250688	0.0184468	CD4/TGFB1/TGFB2/HLA-DRA/IL5/IL6	6
PEDERSEN_METASTASIS_BY_ERBB2_ISOFORM_6	PEDERSEN_METASTASIS_BY_ERBB2_ISOFORM_6	6/1154	29/20738	0.00461456	0.0250688	0.0184468	MGP/BRINP2/LOXL1/ITGB2/KMO/SACS	6
PID_S1P_S1P3_PATHWAY	PID_S1P_S1P3_PATHWAY	6/1154	29/20738	0.00461456	0.0250688	0.0184468	S1PR3/ITGB3/CXCR4/PDGFRB/JAK2/GNA14	6
REACTOME_TNFS_BIND_THEIR_PHYSIOLOGICAL_RECEPTORS	REACTOME_TNFS_BIND_THEIR_PHYSIOLOGICAL_RECEPTORS	6/1154	29/20738	0.00461456	0.0250688	0.0184468	CD27/TNFSF8/LTA/TNFSF13B/CD70/TNFSF18	6
EBAUER_MYOGENIC_TARGETS_OF_PAX3_FOXO1_FUSION	EBAUER_MYOGENIC_TARGETS_OF_PAX3_FOXO1_FUSION	8/1154	48/20738	0.00464308	0.02515	0.0185066	SGCD/MEF2C/MYBPC2/AEBP1/MYBPH/COL6A3/SMPX/ABLIM3	8
REACTOME_INTERLEUKIN_3_INTERLEUKIN_5_AND_GM_CSF_SIGNALING	REACTOME_INTERLEUKIN_3_INTERLEUKIN_5_AND_GM_CSF_SIGNALING	8/1154	48/20738	0.00464308	0.02515	0.0185066	VAV1/PIK3CD/CSF2RB/JAK3/INPP5D/JAK2/CSF2RA/IL5	8
GALINDO_IMMUNE_RESPONSE_TO_ENTEROTOXIN	GALINDO_IMMUNE_RESPONSE_TO_ENTEROTOXIN	11/1154	80/20738	0.00465113	0.0251568	0.0185116	RAC2/CSF2RB/CD44/PCDH7/CD83/BCL6B/CD14/SLFN12L/CCL5/LILRB4/SPP1	11
[truncated: 90 more rows]

## Sheet: Immune
ID	Description	GeneRatio	BgRatio	pvalue	p.adjust	qvalue	geneID	Count
[truncated: 958 more rows]

## Sheet: Motif
ID	Description	GeneRatio	BgRatio	pvalue	p.adjust	qvalue	geneID	Count
[truncated: 550 more rows]
