# Supplementary material for: Gene Regulatory Network Characterization of Gastric Cancer’s Histological Subtypes: Distinctive Biological and Clinically Relevant Master Regulators
Source: Cancers (Basel). 2022 Oct 10;14(19):4961. doi: 10.3390/cancers14194961 (PMC9563962; doi:10.3390/cancers14194961)
Supplement: Supplementary file 1 [file cancers-14-04961-s001.zip › FileS3.xlsx]

## Sheet: Hallmark
ID

## Sheet: Position
ID

## Sheet: GO
ID

## Sheet: Path
ID

## Sheet: Immune
ID

## Sheet: Motif
ID
