# Supplementary material for: Gene Regulatory Network Characterization of Gastric Cancer’s Histological Subtypes: Distinctive Biological and Clinically Relevant Master Regulators
Source: Cancers (Basel). 2022 Oct 10;14(19):4961. doi: 10.3390/cancers14194961 (PMC9563962; doi:10.3390/cancers14194961)
Supplement: Supplementary file 1 [file cancers-14-04961-s001.zip › FileS4.xlsx]

## Sheet: readme
test performed to define differentially expressed/active gene/MR was the t-test
to perform t-test on expression counts we previuosly transformed them in log2 counts per milion.
we decided to use this procedure for compatibility with the test on ssMRS
values reported may differ in intensity from the ones calculated by linear model on counts and reported in table S1. Such behavior is completely expected when using these two different apporaches

## Sheet: Sheet 1
	EXPRESSION				MRA		ssMRA
row.names	Diff	Int	DiffvsInt	p.value	nes	MR.p.value	ssMR.nes	ssMR.p.value	l.MRs
SOX9	6.86943	7.83243	-0.962994	3.31959e-10	-8.21462	2.12834e-16	-1.06924	5.66126e-19	78
ACTR5	2.94111	3.44122	-0.500108	6.85263e-08	-8.09347	5.79879e-16	-1.20497	5.58276e-18	318
CITED2	5.36009	4.68587	0.674225	1.18135e-08	7.91244	2.52384e-15	0.962668	1.01321e-17	94
VEGFA	6.35645	7.18112	-0.824666	1.55429e-07	-7.91074	2.55859e-15	-1.24412	1.01951e-17	19
ZFP64	4.41591	4.81616	-0.400256	2.20225e-08	-7.68859	1.48765e-14	-0.926958	3.24366e-17	99
PTGDR	-0.591114	-1.83353	1.24242	7.15403e-10	7.99543	1.29122e-15	1.28384	3.51634e-17	20
CRHBP	-1.37958	-2.73074	1.35116	9.44873e-13	7.90161	2.75318e-15	1.23121	3.65966e-17	59
TAF4	4.73262	5.26708	-0.534455	2.88955e-10	-8.12008	4.65862e-16	-1.25226	3.73013e-17	112
NELFCD	5.80808	6.4592	-0.651117	1.85983e-12	-7.93148	2.16544e-15	-1.15192	3.76873e-17	137
CELSR3	3.15545	4.05188	-0.896429	3.34788e-05	-7.8604	3.82894e-15	-1.16447	4.1856e-17	50
RCOR2	1.2795	1.99502	-0.71552	0.00308463	-7.96489	1.65377e-15	-1.2699	8.82229e-17	84
PCSK6	3.75176	4.77673	-1.02498	7.48835e-10	-7.91102	2.55292e-15	-1.18061	1.73823e-16	75
PNRC1	6.9982	6.48094	0.517252	9.51681e-09	7.68602	1.5178e-14	1.08926	1.75274e-16	111
TRIM24	5.17094	5.7196	-0.548665	1.14737e-05	-8.1407	3.92997e-16	-1.22422	1.88139e-16	62
PRMT2	5.36815	4.96464	0.403504	1.80811e-07	7.61881	2.56024e-14	1.13321	2.19997e-16	31
ELANE	-2.74096	-3.89566	1.1547	1.64606e-09	7.50366	6.20588e-14	1.02306	3.55053e-16	30
EFNA1	5.03723	5.88416	-0.846927	9.61052e-09	-7.60634	2.81975e-14	-1.28461	5.93432e-16	191
SIRT5	3.16658	3.42795	-0.261376	0.000522577	-7.73087	1.06815e-14	-1.2219	7.3761e-16	146
HTR7	-1.11103	-2.43685	1.32582	5.87359e-12	7.55291	4.25632e-14	1.08946	7.78639e-16	17
CHD7	5.14272	5.65153	-0.508803	7.6082e-07	-7.68509	1.52892e-14	-1.06845	8.39661e-16	328
GRB7	4.06173	5.82499	-1.76326	1.63724e-11	-7.05689	1.70272e-12	-1.04589	9.08289e-16	34
GNB4	5.51523	4.29598	1.21924	9.37341e-13	7.86309	3.74781e-15	1.23711	9.88405e-16	39
TSC22D3	6.11738	5.29481	0.822569	7.27109e-07	7.42921	1.09249e-13	0.961212	1.12627e-15	82
PDE1B	2.19661	0.893049	1.30356	1.13639e-09	7.54864	4.39811e-14	1.14903	1.17735e-15	29
MSN	8.41444	7.48165	0.932789	3.90995e-12	7.79467	6.45758e-15	1.28448	1.19877e-15	30
GRHL2	4.24304	5.03797	-0.794931	7.5977e-06	-7.37136	1.68894e-13	-1.09881	1.35121e-15	281
SH3BGRL	7.05402	6.097	0.957019	6.38168e-11	7.36343	1.79241e-13	1.08826	1.36077e-15	45
ADAMTS1	5.62663	4.50805	1.11858	4.94429e-10	7.49621	6.5691e-14	1.08746	1.52095e-15	21
JAZF1	4.08483	3.19685	0.88798	1.31957e-11	7.58295	3.37793e-14	1.22051	1.60925e-15	63
PRMT6	3.66538	3.66465	0.000732589	0.995641	-7.76498	8.16555e-15	-1.22235	2.06026e-15	77
DMBX1	-1.73386	-0.493334	-1.24052	0.000351075	-7.3074	2.72366e-13	-0.828435	2.10795e-15	75
ERBB3	7.2202	8.15571	-0.935509	2.35508e-09	-7.18453	6.74376e-13	-1.04996	2.18191e-15	61
CLIC2	3.45093	2.44067	1.01026	9.31535e-11	7.83592	4.6541e-15	1.30871	2.29865e-15	26
SETDB1	4.98862	5.21206	-0.223447	0.00057615	-7.40811	1.28115e-13	-1.08718	2.33077e-15	190
FOXA2	2.95253	4.61576	-1.66323	6.02094e-10	-7.56212	3.96551e-14	-0.985742	2.47518e-15	191
ARHGAP15	2.94899	1.65152	1.29747	7.33738e-13	7.53868	4.74753e-14	1.32426	2.71147e-15	19
RRBP1	8.41406	9.03062	-0.616556	7.50667e-07	-7.32252	2.43366e-13	-1.15276	2.82423e-15	48
MACC1	5.22474	5.94986	-0.725116	0.000154507	-7.31928	2.49299e-13	-0.90815	2.91869e-15	227
VAV2	5.56715	5.84414	-0.276993	0.0127117	-7.7405	9.90252e-15	-0.848572	3.31757e-15	53
RHPN1	2.70681	3.79835	-1.09154	3.93786e-11	-7.41283	1.23636e-13	-1.07358	3.42613e-15	74
RGS2	5.22435	4.17377	1.05058	4.98428e-09	7.48429	7.19344e-14	1.03644	3.44245e-15	35
TREML1	-1.49312	-2.50276	1.00964	2.20422e-08	7.46629	8.24877e-14	1.28642	3.48656e-15	9
L3MBTL4	0.928548	0.0380376	0.89051	0.000364614	7.62051	2.52674e-14	1.2137	3.56856e-15	106
GRHL3	-0.305846	0.945539	-1.25138	6.14683e-06	-7.58388	3.35368e-14	-1.07257	3.72912e-15	123
GRHL1	2.19699	3.06822	-0.871236	2.62735e-07	-7.37394	1.65662e-13	-1.03917	3.96242e-15	96
P2RY14	2.3215	0.721832	1.59966	8.87655e-14	7.4561	8.91219e-14	0.994691	4.50579e-15	31
GPR88	-1.08695	-2.72766	1.64071	7.67666e-12	7.33616	2.19807e-13	1.21512	5.45035e-15	15
KLHL31	-0.977807	-0.248389	-0.729418	7.76318e-05	-7.54121	4.65615e-14	-1.242	5.51718e-15	170
NR6A1	1.70446	2.42425	-0.719792	8.28526e-07	-7.438	1.02222e-13	-1.07569	5.53764e-15	148
KAT2B	4.63611	3.91721	0.718903	1.09016e-08	7.38247	1.55379e-13	1.02597	5.80703e-15	230
ZEB2	5.73165	4.41424	1.31741	8.43035e-16	7.51298	5.77949e-14	1.23981	5.99644e-15	68
DCLK1	2.9345	0.840512	2.09399	3.5314e-14	7.44906	9.40076e-14	1.22908	6.01527e-15	28
BCL2	3.88744	2.66327	1.22417	4.1498e-14	7.48992	6.89177e-14	1.17988	6.23066e-15	15
AXL	5.94375	4.89896	1.04479	6.08249e-10	7.45206	9.18917e-14	1.2448	6.35759e-15	43
ZNF695	-0.327294	1.21242	-1.53971	1.43314e-11	-7.16312	7.88589e-13	-0.818341	6.54605e-15	106
FABP4	1.18769	-1.00398	2.19167	2.0526e-12	7.25715	3.95339e-13	1.03155	6.58351e-15	136
CIAO1	5.56647	5.79944	-0.232964	2.78774e-06	-7.47692	7.60875e-14	-1.20781	6.89515e-15	103
LRRK2	3.32098	1.95842	1.36256	2.7361e-10	7.47597	7.66348e-14	1.22784	7.27712e-15	51
VLDLR	3.01493	1.96829	1.04664	6.68676e-06	7.08457	1.39477e-12	1.05654	8.17439e-15	19
S1PR2	3.20768	2.40857	0.799107	5.13311e-09	7.50839	5.986e-14	1.35564	8.21225e-15	37
RASSF2	5.10758	3.85232	1.25525	1.4529e-11	7.54868	4.39705e-14	1.30298	8.21787e-15	30
ZNF664	6.66458	6.95403	-0.289452	0.000245984	-7.57371	3.6272e-14	-1.23104	8.88016e-15	68
GGCT	4.90854	5.37793	-0.46939	7.54612e-06	-7.386	1.51315e-13	-1.05632	9.59805e-15	65
ESR1	1.14588	-0.234496	1.38037	7.43918e-12	7.39479	1.41632e-13	1.26471	9.73778e-15	69
RSPO1	-0.2887	-2.07057	1.78187	1.65424e-09	6.94323	3.83244e-12	1.16394	1.1762e-14	19
SSBP2	3.8901	2.4968	1.39329	2.24926e-13	7.17827	7.05969e-13	1.05268	1.25341e-14	295
RCVRN	-2.50457	-3.61561	1.11105	5.08962e-12	7.29958	2.88676e-13	1.18844	1.41494e-14	13
EGR1	7.19053	6.7864	0.40413	0.0509922	7.08574	1.38303e-12	0.958521	1.57778e-14	150
MDFIC	4.90783	3.77894	1.12889	7.22133e-13	7.62278	2.48262e-14	1.27897	1.64663e-14	33
CHKA	4.2974	4.89065	-0.593255	1.36013e-06	-7.34583	2.04485e-13	-1.01594	1.67111e-14	63
MEF2C	5.16494	3.90404	1.26089	5.88279e-14	7.12307	1.0555e-12	1.23997	1.67705e-14	88
ZSCAN5A	1.95325	2.25899	-0.305747	0.00311767	-7.1293	1.0088e-12	-1.0703	1.83457e-14	51
ARHGAP31	5.15661	4.22331	0.933296	3.85388e-11	7.28188	3.29195e-13	1.22248	1.94622e-14	42
TCEAL7	0.815634	-0.712272	1.52791	2.46519e-14	7.10531	1.20052e-12	1.15488	2.01002e-14	340
FOXJ1	0.309776	1.44885	-1.13908	0.0208555	-7.41964	1.17442e-13	-1.16112	2.05358e-14	91
GPR183	3.86371	2.73697	1.12674	1.74223e-09	7.30854	2.70068e-13	1.22006	2.09144e-14	20
RAP1A	6.23371	5.70751	0.526204	8.53223e-11	6.95506	3.52415e-12	0.947917	2.16246e-14	55
GNG2	4.40877	3.39016	1.01861	1.67879e-11	7.27935	3.35429e-13	1.269	2.23911e-14	19
ELL2	5.25929	4.79703	0.462261	0.000125689	7.07732	1.46964e-12	0.99014	2.66742e-14	494
FOXD1	0.570541	0.773517	-0.202976	0.583317	-7.17726	7.11218e-13	-0.898044	2.75998e-14	74
MAPRE2	6.13058	5.74906	0.381516	0.000110257	7.07102	1.53804e-12	1.00944	2.83246e-14	30
HNF4A	5.68334	7.06044	-1.37711	2.9613e-09	-7.08781	1.36255e-12	-1.02874	3.01865e-14	331
BHLHE22	0.678877	-0.866626	1.5455	1.88212e-11	7.15929	8.10955e-13	1.2106	3.07736e-14	38
LPAR4	-1.12283	-2.17607	1.05324	4.19326e-08	7.13226	9.8732e-13	1.18054	3.79872e-14	21
RORB	0.300781	-1.48109	1.78187	1.498e-12	7.41862	1.18349e-13	1.10394	3.90459e-14	14
PRDM8	2.15629	0.905735	1.25055	2.2322e-08	6.84677	7.55377e-12	1.1078	4.04286e-14	57
MAPK13	5.83257	6.49857	-0.665996	2.41835e-09	-7.05178	1.76641e-12	-1.04826	4.11385e-14	67
EYA1	-1.6154	-2.5229	0.907504	0.000268078	7.25813	3.92471e-13	1.18425	4.34632e-14	129
MAF	5.34917	4.33943	1.00975	4.01559e-11	7.16926	7.54041e-13	1.25351	4.6401e-14	58
SH3BP5	4.58897	3.81512	0.773844	4.03609e-09	7.13097	9.96655e-13	1.17307	4.68861e-14	21
ARHGEF6	4.47354	3.35543	1.11811	7.00029e-12	7.26896	3.62263e-13	1.26781	4.68982e-14	29
GNG11	4.21111	3.3493	0.861808	2.01689e-09	7.13286	9.83027e-13	1.10771	4.77934e-14	33
BNC2	3.92408	2.05565	1.86844	4.67902e-14	7.23021	4.82249e-13	1.17862	4.94137e-14	108
LPAR1	3.90587	2.76963	1.13625	4.68684e-10	7.33334	2.24488e-13	1.11622	4.96168e-14	29
PCSK9	1.8869	4.07482	-2.18792	1.40915e-10	-7.03897	1.93667e-12	-0.944779	5.27458e-14	36
ETV4	3.64213	4.99772	-1.35558	3.65341e-08	-7.20474	5.81532e-13	-0.855814	5.31487e-14	77
TGFB3	3.77345	2.44829	1.32516	6.00497e-11	7.43144	1.07418e-13	1.1427	5.33847e-14	17
PKNOX2	1.06084	-0.50432	1.56516	8.90841e-12	6.99823	2.59224e-12	0.994943	5.34508e-14	145
ARHGAP20	1.42505	-0.0223533	1.4474	3.92573e-12	7.06793	1.57261e-12	1.08893	5.45799e-14	51
TRAIP	1.39741	2.18896	-0.791559	4.70409e-11	-7.01392	2.31734e-12	-0.980909	5.56314e-14	28
ZBTB9	2.93301	3.35748	-0.424467	6.36604e-07	-7.08709	1.36961e-12	-1.03446	5.73077e-14	75
PLA2G4C	2.69316	1.75128	0.941879	1.17766e-07	6.75294	1.44874e-11	1.18528	5.9948e-14	10
IGF1	4.97592	2.60508	2.37084	1.09425e-12	7.03214	2.03391e-12	1.20981	6.1707e-14	344
MRAS	4.10671	3.08332	1.02338	2.9426e-09	7.1886	6.54584e-13	1.14274	6.42836e-14	24
LANCL2	4.09137	4.40737	-0.315994	0.00191927	-7.1305	1.00007e-12	-1.15626	6.83199e-14	57
MAPK15	0.302992	1.29379	-0.9908	5.78875e-05	-7.0301	2.06384e-12	-1.07637	6.96008e-14	352
ARHGAP39	3.3982	4.31916	-0.920954	3.54093e-11	-6.96677	3.24309e-12	-0.846682	7.08305e-14	79
MAPK10	2.26466	0.64564	1.61902	1.1443e-12	6.93222	4.14299e-12	1.12236	7.25551e-14	78
TIGD3	-1.33257	-0.689277	-0.643297	1.08273e-05	-7.22309	5.08182e-13	-1.0951	7.2682e-14	82
RAB22A	5.56602	5.97726	-0.411235	1.10269e-08	-7.38288	1.54906e-13	-0.636383	7.33032e-14	67
CREM	3.82724	3.50846	0.318779	0.000216973	6.94208	3.86361e-12	1.12003	7.64534e-14	158
GAS7	5.37566	4.13948	1.23618	1.34217e-10	7.19452	6.26816e-13	1.17909	7.75207e-14	48
PPP2R2B	0.482144	-0.725177	1.20732	1.0367e-07	7.28382	3.24505e-13	1.21951	8.2134e-14	27
TONSL	4.28957	5.16752	-0.877948	1.32973e-09	-7.02518	2.13797e-12	-0.996223	8.63457e-14	214
CAMTA2	5.72911	5.53414	0.194966	0.00453838	6.9407	3.90148e-12	0.911345	8.64723e-14	124
ZNF165	1.48715	2.17203	-0.684889	2.49418e-07	-7.03204	2.03538e-12	-1.04967	8.69496e-14	53
ASB2	3.37025	1.5352	1.83505	4.93355e-10	7.02292	2.17281e-12	1.06506	9.17011e-14	39
DDR2	6.03133	4.54042	1.49091	1.51075e-12	7.21249	5.49367e-13	1.17223	9.22457e-14	53
IQGAP3	4.93451	5.89192	-0.957414	9.67637e-09	-6.59901	4.13925e-11	-0.817133	9.25114e-14	34
NCSTN	6.81382	7.11018	-0.296365	4.71033e-05	-6.8007	1.04109e-11	-1.05173	9.38945e-14	46
ZFP36L1	8.44199	7.98811	0.453885	1.36326e-05	6.95355	3.56204e-12	1.03196	9.9391e-14	47
EGR2	3.18594	2.23001	0.955927	1.13623e-05	7.05932	1.6732e-12	1.22124	1.00958e-13	47
TOP1	6.78856	7.26536	-0.476802	3.09354e-08	-7.17259	7.35917e-13	-0.996135	1.01372e-13	42
NR3C1	5.53559	4.57645	0.959136	5.84447e-10	6.98898	2.76885e-12	1.101	1.03566e-13	95
OTX1	1.6686	2.64464	-0.976045	2.10074e-06	-6.83135	8.41172e-12	-0.773694	1.03665e-13	77
CYSLTR1	1.99175	0.676195	1.31555	9.33578e-12	7.10094	1.23911e-12	1.21676	1.0768e-13	45
CERS2	7.00382	7.28587	-0.282051	0.000970819	-7.17366	7.30205e-13	-1.10707	1.11267e-13	84
BAMBI	2.19246	3.47872	-1.28626	2.35329e-05	-7.52968	5.08639e-14	-1.12022	1.16067e-13	89
FLI1	4.20907	3.05355	1.15552	3.94396e-13	7.27917	3.35883e-13	1.25246	1.16157e-13	107
NTRK3	0.360949	-1.59435	1.9553	3.89099e-11	6.84228	7.79406e-12	0.990003	1.16484e-13	23
HTR2B	0.620764	-0.515681	1.13645	7.66022e-06	7.18889	6.53202e-13	1.08712	1.17878e-13	16
ZNF217	5.6495	6.04612	-0.396623	0.000551716	-7.15656	8.27291e-13	-0.887028	1.26045e-13	113
FCGR2B	3.27661	1.8236	1.45302	6.17801e-11	7.08159	1.42509e-12	1.16235	1.27057e-13	16
HNF1A	3.54027	4.69522	-1.15495	5.98596e-08	-6.87651	6.13354e-12	-1.00658	1.33777e-13	128
IL1R1	6.28166	5.51147	0.770183	2.82261e-07	7.10459	1.20679e-12	1.17584	1.3402e-13	16
MUTYH	3.22933	3.59757	-0.368247	8.55167e-06	-7.14837	8.78132e-13	-1.01921	1.3666e-13	56
ZNF774	2.20304	2.64253	-0.439485	0.00266457	-7.15896	8.12885e-13	-1.18898	1.37286e-13	141
PRKCB	4.61262	3.02322	1.5894	2.67804e-10	6.95112	3.62397e-12	1.19425	1.37313e-13	29
MEIS1	4.41473	3.28611	1.12863	2.51698e-09	6.84514	7.64021e-12	1.04226	1.37718e-13	40
PRDM6	1.3077	-0.0360845	1.34379	8.95385e-09	7.114	1.12729e-12	1.18387	1.41542e-13	215
ZNF385D	1.3872	-0.242507	1.62971	2.4234e-11	6.9771	3.01327e-12	1.13864	1.45936e-13	58
OVOL1	2.34029	3.95167	-1.61137	4.2538e-09	-6.89692	5.31436e-12	-0.879535	1.537e-13	104
ZNF781	-0.193172	-1.31317	1.11999	4.03887e-10	6.79183	1.1072e-11	0.946303	1.57083e-13	43
ARL2BP	5.47848	5.12254	0.355939	7.56611e-07	7.14696	8.87192e-13	1.06587	1.59814e-13	53
TBC1D4	4.43647	4.88136	-0.444893	0.00412851	-7.29095	3.07784e-13	-1.195	1.7429e-13	39
RTKN	4.73726	5.57825	-0.840983	1.04091e-12	-6.97828	2.98818e-12	-0.916434	1.75144e-13	85
MEOX2	1.31685	-0.940171	2.25702	2.71322e-12	6.9572	3.47105e-12	1.14097	1.80299e-13	23
NPR1	2.8193	1.78878	1.03052	6.52544e-09	6.89613	5.34367e-12	1.05509	1.80468e-13	21
CHD3	6.99525	6.61214	0.383118	0.000701298	6.83792	8.03508e-12	1.10567	1.81522e-13	108
TWIST2	1.86262	0.242129	1.62049	6.00636e-12	7.00557	2.45976e-12	1.11637	1.82954e-13	39
FGF2	2.95306	1.54675	1.40631	1.04321e-09	6.92601	4.32873e-12	1.02216	1.9052e-13	27
HDAC9	3.81719	2.90814	0.909053	5.94096e-05	6.91908	4.54576e-12	1.18155	1.94241e-13	102
ZDHHC23	3.2327	3.9549	-0.722205	5.60105e-10	-6.80598	1.00362e-11	-0.966511	1.95814e-13	157
ZNF626	1.85481	0.518474	1.33633	2.19649e-09	7.10414	1.2107e-12	1.10351	2.02997e-13	53
AURKA	4.00109	5.16327	-1.16219	7.35307e-13	-6.59657	4.20787e-11	-0.796806	2.05738e-13	50
GDF6	-0.803929	-2.5993	1.79537	5.12093e-09	6.95608	3.49879e-12	1.16449	2.27836e-13	132
ADCYAP1R1	-0.949636	-2.39617	1.44653	4.73413e-07	6.83689	8.09304e-12	0.909696	2.35482e-13	30
IL31RA	-1.53029	-2.6299	1.09961	2.01282e-05	6.69483	2.15927e-11	1.14426	2.41114e-13	22
STAC	0.118062	-0.924662	1.04272	0.000141115	6.92119	4.47852e-12	1.11639	2.43111e-13	16
ELMO1	4.69881	3.7397	0.95911	1.1008e-09	7.07692	1.47397e-12	1.27247	2.49737e-13	27
GADD45B	4.64494	3.98845	0.656491	1.63059e-05	6.80141	1.03602e-11	0.846094	2.50314e-13	18
RASGRP2	2.78458	1.27027	1.51431	1.39526e-11	6.89315	5.45711e-12	1.10808	2.51085e-13	55
TOP2A	6.27154	7.51146	-1.23992	4.86291e-11	-6.52449	6.8233e-11	-0.720629	2.64174e-13	207
SMARCA2	6.12273	5.57222	0.550512	9.63619e-06	6.81786	9.24054e-12	1.0218	2.65984e-13	113
FNBP1	6.04991	4.7902	1.25971	4.40638e-11	6.87328	6.27415e-12	1.17266	2.74162e-13	49
NFE2L3	5.25344	5.97923	-0.725788	2.5782e-07	-6.8272	8.65889e-12	-0.711334	2.83601e-13	159
MITF	3.9755	2.96169	1.01381	6.9385e-09	7.19325	6.32658e-13	1.16946	2.91943e-13	52
CD69	2.66359	1.362	1.30159	8.95894e-09	7.12806	1.01793e-12	1.19511	2.95816e-13	11
RELN	1.02823	-0.839923	1.86815	1.24676e-09	6.91263	4.75741e-12	1.03994	2.97344e-13	14
PKIA	1.89316	0.819094	1.07406	5.66691e-06	6.85575	7.09398e-12	1.16159	3.05724e-13	252
KCNIP1	-1.1824	-2.71553	1.53312	3.70792e-09	6.71397	1.89405e-11	1.1553	3.12581e-13	18
MPP1	4.05077	3.29121	0.759567	3.24769e-06	7.36794	1.7328e-13	1.18253	3.17823e-13	26
FGFR4	4.6753	6.02392	-1.34862	2.40074e-09	-6.81778	9.24593e-12	-0.987154	3.34894e-13	101
ZFPM2	2.48889	0.755134	1.73376	6.16146e-14	6.89635	5.33575e-12	1.12304	3.51503e-13	101
IRF6	5.23592	5.95746	-0.721537	9.69103e-08	-6.63534	3.23745e-11	-1.07913	3.59652e-13	89
DTX1	3.47913	2.03936	1.43978	1.37457e-11	6.8993	5.22593e-12	1.1821	3.73976e-13	37
NRIP2	1.93781	1.10989	0.827921	2.21485e-09	6.78685	1.14607e-11	1.11922	3.81439e-13	247
CHRDL1	2.82571	-0.000476777	2.82619	1.52739e-10	6.83061	8.45544e-12	1.07862	3.81958e-13	36
FCER1A	0.355929	-1.66365	2.01957	3.14372e-11	6.73458	1.64402e-11	1.13652	3.82132e-13	27
ZNF311	-1.27352	-1.36428	0.0907569	0.688428	6.67238	2.51696e-11	1.01813	3.95967e-13	55
ATXN1	5.34184	4.90684	0.435006	9.2169e-05	6.94973	3.65984e-12	1.1118	4.02715e-13	175
ZNF124	2.0607	2.4673	-0.406597	4.89071e-06	-7.04305	1.88082e-12	-0.917644	4.13253e-13	108
CLEC1A	1.2806	0.454435	0.82616	2.07121e-09	6.83169	8.39227e-12	1.12258	4.18675e-13	14
RERGL	-0.482753	-2.39001	1.90726	3.39485e-11	6.67564	2.46147e-11	0.776042	4.19803e-13	24
NMUR1	0.664832	-0.407144	1.07198	1.7945e-07	6.85238	7.26303e-12	1.071	4.28533e-13	20
MRGPRX2	-4.55778	-4.69702	0.139243	0.169102	6.52091	6.98817e-11	0.843989	4.30324e-13	30
JUP	8.59977	9.74221	-1.14245	4.57662e-08	-6.76958	1.2916e-11	-1.03834	4.42294e-13	284
ARHGAP24	3.88876	3.03134	0.857419	5.50965e-08	6.92962	4.21966e-12	0.890208	4.61092e-13	38
WWTR1	6.82861	5.73044	1.09817	9.53379e-11	6.71067	1.93731e-11	1.08457	4.71397e-13	204
HPGDS	0.551918	-0.783564	1.33548	1.34952e-08	6.81488	9.43397e-12	0.887714	5.0253e-13	34
ITPR1	4.9414	3.8624	1.07901	5.77518e-13	6.92305	4.42037e-12	1.06321	5.07632e-13	47
RHOQ	5.51631	4.90613	0.610179	2.45683e-10	6.53758	6.25226e-11	1.00197	5.16632e-13	39
LHCGR	-3.25237	-4.03242	0.78005	1.60032e-05	6.54292	6.03308e-11	1.05082	5.18436e-13	13
PTGFR	1.52857	0.111755	1.41681	2.86402e-10	6.86758	6.52979e-12	1.1509	5.19957e-13	33
NR4A3	3.39948	2.61946	0.780022	0.000424805	6.85169	7.298e-12	1.09696	5.20746e-13	70
FOXJ2	5.1209	4.7721	0.348797	2.76022e-05	6.99718	2.61166e-12	1.00862	5.28952e-13	55
ELF3	7.59127	8.51858	-0.927314	4.5133e-09	-6.52483	6.80785e-11	-1.03327	5.32643e-13	149
HES2	-0.258897	1.00415	-1.26305	1.69788e-05	-6.72973	1.69977e-11	-0.672793	5.3517e-13	112
ARFGAP1	5.56269	6.02879	-0.466101	6.82567e-08	-7.06613	1.59312e-12	-1.03076	5.43113e-13	73
RGL1	4.33717	3.5957	0.741469	5.37303e-07	6.75061	1.47222e-11	1.11775	5.46431e-13	27
SNCA	1.01241	0.105616	0.906789	1.25647e-05	6.92208	4.45049e-12	0.879962	5.47206e-13	12
ITPR3	7.61472	8.2268	-0.612086	2.18832e-06	-6.84441	7.67943e-12	-0.976346	5.52308e-13	44
GEM	5.30854	4.18967	1.11887	2.72963e-10	6.8055	1.00702e-11	0.994393	5.6688e-13	17
BACH2	2.08743	0.794509	1.29292	1.29586e-08	6.82075	9.05681e-12	1.23475	6.075e-13	42
RGS4	2.6177	1.25553	1.36217	4.55115e-08	6.86027	6.87317e-12	1.09174	6.13343e-13	15
NCOA5	4.95657	5.13462	-0.178051	0.0130658	-7.29723	2.93742e-13	-1.1625	6.14786e-13	359
NCOA6	6.49079	6.85456	-0.363779	3.74422e-07	-7.24255	4.40332e-13	-1.11177	6.31619e-13	75
CPE	4.70517	3.1787	1.52647	2.09034e-11	6.69348	2.1793e-11	1.06053	6.51838e-13	40
RPL7L1	6.30195	6.72869	-0.426739	1.19084e-06	-6.92127	4.47618e-12	-1.02329	6.56626e-13	116
AKT3	5.05703	3.86906	1.18797	1.73938e-11	6.78305	1.17661e-11	1.09548	6.61964e-13	37
PIK3CD	4.47989	3.44945	1.03044	9.93082e-10	6.9698	3.17399e-12	1.24757	6.65297e-13	31
NFKBIA	6.57314	6.35985	0.213297	0.0337428	7.02096	2.20356e-12	0.935136	6.75036e-13	42
SPOP	5.61312	5.29241	0.320717	3.78455e-06	6.43905	1.20226e-10	1.0406	7.15162e-13	33
RIN3	5.31502	4.70109	0.61393	1.53614e-05	6.62158	3.55374e-11	1.10923	7.23718e-13	34
VGLL3	3.60609	2.23306	1.37303	2.63235e-09	6.84644	7.57082e-12	1.07793	7.31525e-13	373
HOXA10	2.29576	3.21149	-0.915724	0.0166904	-6.72958	1.70149e-11	-0.808142	7.40078e-13	76
ADRB2	0.811438	-0.52303	1.33447	1.95339e-10	6.83866	7.99378e-12	0.733636	7.48037e-13	72
CCL2	4.89508	3.84099	1.0541	1.43129e-07	6.96886	3.19527e-12	1.09238	7.74218e-13	28
FGFR3	3.10059	4.54265	-1.44206	5.23992e-08	-6.924	4.39064e-12	-1.11168	7.80801e-13	65
CCL13	0.264793	-0.838912	1.1037	6.02195e-05	7.3824	1.55465e-13	1.06522	8.08381e-13	23
NKIRAS1	2.35572	2.07401	0.281702	0.00253744	6.84031	7.90239e-12	0.914838	8.17019e-13	47
CBX8	2.23435	2.65003	-0.41568	0.000675472	-7.01376	2.31994e-12	-1.09459	8.17026e-13	104
ZNF473	3.27082	3.60696	-0.336148	0.000121296	-6.89171	5.51276e-12	-0.831221	8.20357e-13	77
TRIB1	6.14353	6.5357	-0.392174	0.00346913	-6.5735	4.91446e-11	-1.14983	8.6644e-13	83
ADIPOQ	-1.63425	-4.0901	2.45585	3.96566e-12	6.6136	3.75081e-11	0.809525	8.72588e-13	30
SPAG5	4.2788	5.20229	-0.923485	8.15229e-10	-6.34138	2.27719e-10	-0.671658	8.7654e-13	75
CEBPG	5.21459	5.53137	-0.316778	0.00290278	-6.8605	6.8622e-12	-0.973693	8.96573e-13	88
GRIN2D	4.19259	4.90124	-0.708659	0.00976798	-6.43556	1.23016e-10	-0.680258	9.07275e-13	87
CHST11	4.61496	3.8109	0.80406	6.3008e-07	6.90795	4.91709e-12	1.15732	9.17679e-13	18
AVPR2	-0.45125	-1.58203	1.13078	2.49324e-07	6.48996	8.58585e-11	1.03826	9.29334e-13	28
TLR6	2.23695	0.909302	1.32764	3.81422e-13	6.83401	8.25737e-12	1.18404	9.34047e-13	22
EBF1	3.63686	2.43541	1.20146	3.04525e-12	6.62898	3.38007e-11	1.09652	9.37511e-13	48
RHOJ	4.00257	2.99075	1.01181	1.56046e-10	6.74229	1.55906e-11	1.10653	9.57608e-13	42
EID2B	0.0700872	-0.569468	0.639555	2.66398e-07	6.41004	1.45481e-10	1.05852	9.73951e-13	153
MEOX1	1.89594	0.560807	1.33514	1.22804e-08	6.77601	1.23543e-11	1.1176	1.02852e-12	41
CCNE1	2.21968	3.34212	-1.12245	2.4647e-06	-6.77842	1.21497e-11	-0.711855	1.03226e-12	56
MAMLD1	2.53866	1.96137	0.577288	0.00065631	6.70562	2.00548e-11	1.13274	1.05741e-12	198
GAS1	3.47796	1.66567	1.8123	1.63863e-09	6.8833	5.8482e-12	1.11462	1.07255e-12	26
AFF3	2.33674	0.517371	1.81937	3.82465e-11	6.60145	4.07159e-11	1.01843	1.07958e-12	119
IL16	4.23286	2.86447	1.36839	3.49426e-12	6.83169	8.39173e-12	1.21848	1.0845e-12	597
MCC	3.99721	2.99753	0.999681	2.03763e-09	6.85776	6.99486e-12	1.07739	1.08559e-12	43
CD40	3.7179	3.05739	0.660507	0.00120824	7.47001	8.01879e-14	1.18847	1.12003e-12	11
OMD	2.01849	-0.204949	2.22344	1.80362e-09	6.66631	2.62307e-11	1.13286	1.12137e-12	30
PPP1R10	6.05143	6.19981	-0.148383	0.0432881	-7.00799	2.41763e-12	-1.07946	1.12443e-12	96
CYLD	5.27695	4.71473	0.562229	1.52769e-08	6.88818	5.65093e-12	1.15629	1.13156e-12	20
PRKG1	3.70141	2.74346	0.957952	1.70748e-08	6.55031	5.74193e-11	1.0962	1.13607e-12	70
ZNF835	-0.131926	-1.48291	1.35098	7.87934e-08	6.587	4.488e-11	0.995279	1.16535e-12	54
RUNX1T1	3.06108	1.48113	1.57995	2.03955e-11	6.61031	3.83507e-11	1.11033	1.18393e-12	73
RAB23	4.8258	3.86997	0.95583	1.62576e-07	6.5112	7.45551e-11	1.01184	1.18562e-12	31
ZSWIM1	3.94126	4.28711	-0.34585	1.25465e-06	-7.4952	6.61949e-14	-1.11895	1.1865e-12	95
PER1	5.42901	4.84553	0.58348	0.000364735	6.75767	1.40224e-11	0.844324	1.21869e-12	29
BMX	-0.0218897	-1.01635	0.994463	1.41907e-06	6.66869	2.58101e-11	0.980531	1.29282e-12	7
ZDHHC13	4.16128	4.54869	-0.387416	1.91743e-05	-6.74572	1.52274e-11	-1.01629	1.30214e-12	51
DNMT3B	1.53884	2.60131	-1.06247	2.30533e-09	-7.06827	1.56878e-12	-0.840089	1.31389e-12	158
GHR	1.97585	0.282584	1.69327	1.01186e-13	6.70251	2.04864e-11	1.00007	1.31419e-12	54
MKNK2	7.01546	6.83002	0.185441	0.0665915	6.92887	4.2423e-12	0.662975	1.33559e-12	59
RTN1	2.20567	1.02271	1.18296	6.57665e-07	6.55565	5.54011e-11	1.06821	1.35843e-12	14
PRKAR2B	3.63668	2.47294	1.16374	3.70201e-08	6.53522	6.35173e-11	1.0548	1.36594e-12	32
ADAP2	3.75506	2.95213	0.80293	2.26608e-09	6.96287	3.33421e-12	1.06598	1.40688e-12	16
GIT2	5.82618	5.24641	0.579767	1.83967e-14	6.68693	2.27903e-11	1.15668	1.42652e-12	34
PIP5K1A	5.55446	5.70534	-0.150879	0.0452036	-6.89792	5.27709e-12	-0.977649	1.43069e-12	44
CBX7	5.21671	4.28982	0.926892	2.26147e-09	6.61321	3.76071e-11	0.872599	1.44744e-12	311
MED20	3.75447	4.20236	-0.447892	1.33118e-06	-6.91346	4.72959e-12	-1.10532	1.4518e-12	144
KAT2A	5.33492	5.74671	-0.411789	1.46714e-05	-6.7988	1.05494e-11	-0.941913	1.45529e-12	76
COLEC12	3.58867	1.70894	1.87973	4.82176e-13	6.96182	3.3591e-12	1.10559	1.46636e-12	14
EID1	6.50189	5.8559	0.645991	8.2864e-10	6.6096	3.85371e-11	0.98289	1.49543e-12	116
TSHZ3	3.70024	2.56419	1.13605	3.48937e-10	6.66045	2.72996e-11	1.06027	1.49973e-12	85
PLEKHG4	3.22849	4.10205	-0.873554	4.22923e-05	-6.92367	4.401e-12	-0.641313	1.53777e-12	81
PRKD1	2.11756	0.940037	1.17752	6.29488e-10	6.80174	1.03365e-11	1.10758	1.5864e-12	32
NFATC1	4.43221	3.62961	0.802595	1.31465e-06	6.7972	1.06673e-11	1.16718	1.58835e-12	44
ZNF582	-0.00273939	-1.20976	1.20702	6.01073e-10	6.65495	2.83402e-11	0.948014	1.59163e-12	88
ANKZF1	4.27105	4.49548	-0.224423	0.00144823	-6.73796	1.60631e-11	-1.07346	1.60569e-12	83
CDH1	7.2672	8.61223	-1.34503	3.235e-10	-6.45972	1.04894e-10	-1.00109	1.6197e-12	172
FOXH1	-1.66027	-0.371318	-1.28895	5.63178e-06	-6.76826	1.30342e-11	-1.07412	1.67827e-12	69
ZDHHC9	6.23351	6.69337	-0.459857	3.48759e-05	-6.7402	1.58166e-11	-0.920924	1.70196e-12	93
ZNF135	0.951652	-0.246288	1.19794	6.0083e-09	6.72601	1.74379e-11	1.04716	1.70612e-12	117
ZCCHC24	5.37107	3.94063	1.43044	4.05985e-12	6.51347	7.34337e-11	1.08471	1.71602e-12	169
BASP1	4.62454	3.55325	1.07129	2.76185e-09	6.71329	1.90288e-11	1.16589	1.7448e-12	272
QKI	6.08454	5.17096	0.913576	1.08906e-11	6.75054	1.47301e-11	1.06856	1.77698e-12	62
FLRT2	3.96887	2.30057	1.6683	4.25749e-11	6.63795	3.1807e-11	1.14902	1.77919e-12	47
MAPKAPK5	4.86421	5.09801	-0.233801	0.000213324	-6.63674	3.20701e-11	-0.951959	1.80563e-12	17
HOXC11	0.789539	1.76491	-0.975367	0.00275082	-6.52022	7.02066e-11	-0.646987	1.85419e-12	88
GFRA2	-0.0501706	-1.28569	1.23552	1.16627e-07	6.64655	3.0005e-11	0.876373	1.86459e-12	43
FGF7	4.434	2.5796	1.8544	3.64723e-12	6.59427	4.27362e-11	1.10377	1.90226e-12	24
NPAS2	5.49294	6.12898	-0.636041	2.10376e-06	-6.4491	1.12516e-10	-1.06927	1.92028e-12	70
ELOVL4	0.243302	-0.824667	1.06797	1.71377e-07	6.72904	1.70786e-11	1.06707	1.93353e-12	52
ID4	3.22447	2.2412	0.983263	1.8907e-06	6.58155	4.65569e-11	0.999888	1.94003e-12	63
ARHGEF25	3.42272	1.866	1.55672	1.75507e-11	6.57075	5.00637e-11	1.05221	1.94371e-12	66
LMO2	3.21244	2.48465	0.727787	1.80089e-07	6.67727	2.43428e-11	1.07116	1.97016e-12	92
RAB31	6.1561	5.1942	0.9619	2.91983e-09	6.74076	1.57563e-11	0.892042	2.00508e-12	28
YBX2	1.3952	2.61862	-1.22342	0.000959751	-6.63413	3.26429e-11	-1.08027	2.10664e-12	80
PLP1	0.125348	-2.39317	2.51852	1.01684e-11	6.45522	1.08064e-10	0.872481	2.14185e-12	45
CDC42EP3	5.33571	4.35114	0.98457	5.61384e-08	6.50961	7.53456e-11	1.10793	2.15223e-12	19
HCFC2	3.9273	3.31355	0.613745	7.89246e-10	6.66638	2.62191e-11	1.0642	2.18104e-12	245
NDN	3.85383	2.50626	1.34757	2.01252e-11	6.6939	2.17306e-11	1.05592	2.25485e-12	78
ABCG4	-1.46864	-2.06689	0.598247	0.000230454	6.43926	1.20059e-10	1.02277	2.2894e-12	105
CD36	3.7799	2.61577	1.16413	7.30142e-09	6.58791	4.46055e-11	0.900868	2.31492e-12	36
CREBL2	5.59399	5.14441	0.449589	1.28747e-08	6.73332	1.65835e-11	1.11797	2.3396e-12	55
PBX3	4.71016	3.69433	1.01583	3.02774e-12	6.34085	2.28498e-10	1.03296	2.34754e-12	36
FOXE3	-3.16908	-2.17187	-0.997211	1.82684e-05	-7.06803	1.57148e-12	-0.91596	2.37544e-12	78
TCF21	3.41701	2.09798	1.31903	1.35503e-11	6.56744	5.11877e-11	1.00438	2.38412e-12	122
MYO6	6.30017	6.96497	-0.664799	2.54287e-09	-6.46786	9.94019e-11	-0.907496	2.43163e-12	52
ZEB1	5.74042	4.60739	1.13302	1.84674e-10	6.44405	1.16326e-10	1.07098	2.49702e-12	123
MAP3K3	5.15138	4.45099	0.700385	5.89889e-13	6.7286	1.71304e-11	1.08731	2.55472e-12	72
MRGPRF	4.3974	2.58888	1.80853	5.80804e-11	6.52112	6.9782e-11	1.0834	2.60604e-12	75
ING5	3.56673	3.78203	-0.215295	0.00934548	-6.77634	1.23257e-11	-0.960961	2.62454e-12	174
SP8	-3.41692	-2.20506	-1.21186	0.000853953	-6.68036	2.38352e-11	-0.727675	2.63644e-12	115
SATB1	4.71955	4.1717	0.547848	0.00122439	6.60956	3.85456e-11	0.994533	2.64453e-12	35
ABCC9	4.05692	2.63533	1.4216	5.13225e-09	6.59997	4.11252e-11	1.07106	2.68457e-12	40
TACR1	0.0503952	-1.67325	1.72364	1.42326e-10	6.60358	4.01333e-11	0.983905	2.69598e-12	28
TDG	4.61536	5.00603	-0.390671	4.16964e-07	-6.74477	1.53267e-11	-0.977732	2.73182e-12	80
FHL5	0.824077	-0.120076	0.944153	6.14712e-07	6.59046	4.38477e-11	1.09545	2.75887e-12	179
SPARCL1	7.94594	6.39342	1.55252	5.27737e-11	6.32576	2.51995e-10	1.04994	2.78211e-12	70
DCLK2	2.06211	0.772961	1.28915	2.84313e-10	6.52796	6.66736e-11	1.01584	2.79265e-12	25
ACVR1B	5.42126	6.05276	-0.631503	1.78788e-08	-6.56767	5.11085e-11	-1.05275	2.88124e-12	72
NGFR	2.50211	0.378282	2.12383	7.20605e-09	6.3848	1.71626e-10	0.940676	2.91932e-12	17
ITGA9	4.82118	3.58125	1.23993	7.66283e-10	6.56696	5.13544e-11	1.05151	2.94885e-12	38
ZBTB4	6.50358	5.92638	0.577205	3.49609e-08	6.41863	1.37505e-10	0.886177	2.97535e-12	199
SFMBT2	3.4699	2.49481	0.975097	2.03178e-08	6.77197	1.27041e-11	1.16342	3.02275e-12	331
PLCL2	3.46376	2.73435	0.729413	6.29649e-05	6.7129	1.90799e-11	1.05899	3.067e-12	65
GLI1	2.17911	0.895146	1.28397	3.08757e-08	6.7359	1.62916e-11	1.14365	3.07191e-12	76
TLR4	3.80414	2.95027	0.853865	5.5405e-07	7.2536	4.0584e-13	0.998453	3.08896e-12	25
GPR135	1.06478	0.323381	0.741398	2.44081e-06	6.3095	2.79941e-10	1.00725	3.15699e-12	25
ESF1	4.40386	4.7829	-0.379041	0.000503289	-6.78776	1.13888e-11	-1.11032	3.18974e-12	258
POU6F1	2.66446	1.62303	1.04142	2.83637e-12	6.41602	1.39882e-10	0.914111	3.21418e-12	76
MAP3K9	3.34871	4.09199	-0.743281	6.02766e-10	-6.63899	3.15844e-11	-0.985186	3.22772e-12	50
SLIT2	3.45915	1.48467	1.97448	1.12184e-10	6.81908	9.16233e-12	1.11399	3.23366e-12	32
LDB2	3.35325	2.58286	0.770386	3.0092e-08	6.60458	3.98651e-11	1.09556	3.24846e-12	248
RAMP3	3.41765	2.52648	0.891172	4.69701e-09	6.76383	1.3439e-11	1.10509	3.26292e-12	25
MS4A6A	4.94591	3.67654	1.26937	4.57503e-11	7.1335	9.78506e-13	1.06368	3.3245e-12	25
TGFBR3	4.9631	4.19665	0.766454	0.00014579	6.50325	7.86043e-11	1.0368	3.39807e-12	17
ARID5A	4.78878	4.19283	0.595941	1.28774e-08	6.56095	5.3467e-11	1.09943	3.53675e-12	194
PTHLH	0.887492	-0.0305479	0.91804	0.000120503	6.86717	6.5488e-12	1.11806	3.54247e-12	19
ZNF385B	0.269421	-0.876276	1.1457	0.000204888	6.65655	2.80328e-11	0.867732	3.54449e-12	53
SP6	1.85737	2.7853	-0.927933	0.000317122	-6.5492	5.78477e-11	-0.985979	3.55447e-12	87
IFI16	6.56392	5.64035	0.923565	1.01073e-08	6.96649	3.24951e-12	1.04764	3.61147e-12	85
MCTP1	3.2876	2.65601	0.631592	2.06438e-05	6.77593	1.23609e-11	1.09787	3.66522e-12	13
POLR3C	4.29206	4.44671	-0.154652	0.0235575	-6.92172	4.46199e-12	-0.9274	3.67181e-12	112
NGF	-1.41812	-2.65025	1.23213	4.77574e-09	6.30848	2.81795e-10	1.04419	3.76947e-12	10
TRIP13	3.195	4.17908	-0.98408	4.99118e-10	-6.26689	3.68318e-10	-0.670694	3.80327e-12	174
ARHGEF16	4.33423	5.24353	-0.909294	4.52116e-08	-6.49095	8.52987e-11	-0.996659	3.80974e-12	87
ABLIM3	4.09614	3.20624	0.889905	1.84843e-06	6.77824	1.21645e-11	1.07926	3.90045e-12	157
ILK	6.83311	6.19411	0.638996	3.1336e-09	6.56885	5.07055e-11	1.01178	3.92579e-12	24
PTGER3	2.81709	1.24359	1.57349	1.89608e-09	6.60627	3.94114e-11	1.09686	3.93377e-12	36
BTG2	7.02402	6.41941	0.604611	2.65326e-05	6.48879	8.65295e-11	0.677159	4.01159e-12	101
ZNF667	0.0597803	-1.0834	1.14318	1.14009e-07	6.57512	4.86152e-11	1.05489	4.10876e-12	39
GLRB	0.597025	-0.424505	1.02153	2.63983e-05	6.60537	3.96526e-11	1.05007	4.1263e-12	44
TXNIP	8.71533	7.92083	0.794494	1.04477e-06	6.55345	5.62239e-11	0.817589	4.1825e-12	40
ZFP82	1.47431	0.458872	1.01543	3.00989e-07	6.61686	3.66918e-11	1.11572	4.2527e-12	21
CALCOCO1	5.72794	5.29095	0.436993	3.56555e-05	6.34668	2.20011e-10	0.8288	4.27293e-12	47
GLI3	3.62489	2.117	1.50789	1.79591e-12	6.75135	1.46471e-11	1.10278	4.34098e-12	69
CLDN4	7.18189	8.40071	-1.21882	6.27323e-09	-6.39575	1.59762e-10	-0.784937	4.61728e-12	84
SH2D3C	4.05042	3.20131	0.84911	1.04642e-09	6.55237	5.66305e-11	1.1542	4.87811e-12	25
ZNF341	2.63503	2.72994	-0.0949056	0.11603	-6.45552	1.07848e-10	-0.980445	4.89372e-12	61
CASK	6.2048	6.58693	-0.382134	0.00123498	-6.64784	2.97433e-11	-0.720823	5.03144e-12	153
ZNF583	1.07957	0.281431	0.798137	1.44984e-05	6.53033	6.56239e-11	0.750299	5.1055e-12	33
SRC	6.64391	7.14402	-0.500116	6.23861e-06	-6.43381	1.24442e-10	-1.00521	5.24434e-12	53
ZMYND19	3.35342	3.7852	-0.431777	4.497e-05	-6.64146	3.10587e-11	-1.06443	5.32347e-12	140
FOXN3	6.6398	5.99611	0.643689	9.16312e-10	6.42838	1.28967e-10	0.910525	5.32649e-12	99
FOXP4	6.88669	7.64325	-0.75656	9.98843e-10	-7.03152	2.04301e-12	-0.904458	5.41973e-12	85
PLCL1	2.26563	1.41942	0.846207	3.75859e-07	6.61364	3.74978e-11	1.09261	5.49521e-12	44
ANK2	3.85146	2.08387	1.76759	1.8e-10	6.46987	9.80875e-11	1.02635	5.49844e-12	84
PRDM12	-3.07609	-2.56543	-0.510659	0.000969136	-6.58906	4.42615e-11	-0.850312	5.52528e-12	43
DCX	-0.732365	-2.61446	1.8821	5.51238e-09	6.33159	2.42654e-10	1.04488	5.59895e-12	29
TP63	-0.251443	-0.828722	0.57728	0.0263328	6.53182	6.49735e-11	1.07656	5.64846e-12	93
SIM2	3.38999	4.52901	-1.13902	8.6461e-11	-6.49712	8.18745e-11	-1.03002	5.69602e-12	72
NR2F2	6.58261	6.0014	0.581205	4.4319e-06	6.43428	1.24063e-10	0.830856	5.83635e-12	47
ZNF257	-0.750948	-0.98192	0.230972	0.405232	6.66753	2.60153e-11	1.09111	5.8396e-12	35
PDE1A	2.79195	1.57378	1.21817	1.84192e-10	6.56582	5.17464e-11	1.09579	5.8486e-12	73
TERT	-1.13957	-0.227349	-0.912225	0.0018786	-6.77962	1.2049e-11	-0.964599	5.91829e-12	57
PDE7B	2.40309	1.0717	1.33138	4.72463e-09	6.35316	2.10935e-10	1.08262	6.38245e-12	24
POGK	6.00237	6.11176	-0.109398	0.0930126	-6.52771	6.67812e-11	-0.883145	6.59183e-12	200
VAPB	5.84586	6.25734	-0.411473	2.99554e-07	-7.11176	1.14569e-12	-1.13957	6.67357e-12	78
EDA2R	0.150693	-0.788088	0.938781	8.37718e-06	6.52211	6.93243e-11	1.08603	6.73787e-12	16
FSTL1	8.15938	7.12051	1.03887	6.91669e-11	6.59168	4.34879e-11	0.977688	6.90817e-12	68
HSPA5	8.82162	9.22525	-0.403633	4.46566e-06	-6.35983	2.01978e-10	-0.904667	7.18777e-12	54
GNG7	2.72418	1.43574	1.28844	4.48063e-09	6.59423	4.27482e-11	0.702442	7.20875e-12	92
CD72	2.14017	1.09922	1.04095	7.005e-09	6.65399	2.85261e-11	1.15808	7.37359e-12	13
CHAF1B	2.86771	3.48011	-0.612396	1.58258e-06	-6.44837	1.13057e-10	-0.905462	7.69471e-12	120
DPYSL3	7.4061	5.75722	1.64888	9.41279e-11	6.45732	1.06576e-10	1.04846	7.74941e-12	65
TERF2IP	5.54791	5.23181	0.3161	1.08883e-05	6.45554	1.07833e-10	0.942015	7.79318e-12	106
ASXL3	-0.0319939	-1.26054	1.22855	6.96891e-07	6.4361	1.22585e-10	1.00202	7.86238e-12	148
BTK	2.79754	1.39914	1.3984	1.05745e-10	6.79495	1.08352e-11	1.14134	7.98471e-12	42
FEZ2	4.8057	4.37671	0.428982	2.14172e-07	6.59195	4.34079e-11	0.933863	8.04626e-12	45
ARHGEF5	5.13745	5.67511	-0.53766	2.90404e-05	-6.4927	8.43102e-11	-0.908191	8.05223e-12	43
ZNF438	3.39597	3.13501	0.260959	0.00697641	6.41442	1.41363e-10	1.00964	8.23448e-12	73
RAC3	1.10219	1.79141	-0.689215	0.00139456	-6.75501	1.42825e-11	-1.08913	8.25304e-12	78
HTR2A	0.744767	-1.02081	1.76557	4.07728e-11	6.40432	1.5104e-10	1.07585	8.39061e-12	13
REM1	0.919647	-0.130048	1.04969	3.48606e-08	6.36249	1.98514e-10	1.09863	8.48278e-12	22
S1PR1	4.96252	3.94594	1.01658	1.33606e-10	6.53145	6.51349e-11	1.10097	8.50753e-12	34
VIPR2	1.06291	-0.765682	1.82859	2.08991e-08	6.17837	6.47678e-10	0.952195	8.6901e-12	41
IL6ST	7.53156	6.83161	0.699951	1.86138e-09	6.50441	7.79968e-11	1.07249	8.70201e-12	94
SPSB4	-2.21615	-2.61739	0.401239	0.0220472	6.47026	9.78372e-11	0.952603	9.08795e-12	30
S1PR3	5.06456	3.9655	1.09906	3.73874e-08	6.33824	2.32402e-10	1.03044	9.13993e-12	23
TLR7	2.32626	0.857795	1.46847	1.18414e-09	6.87303	6.28503e-12	1.12572	9.24775e-12	19
INSIG1	5.0385	5.62983	-0.591328	2.19187e-05	-6.67885	2.40818e-11	-1.03806	9.27049e-12	50
ZNF521	3.27657	2.28192	0.994645	3.97086e-09	6.41496	1.40856e-10	1.06207	9.38841e-12	40
TCEAL5	-2.42275	-4.01187	1.58912	4.82667e-13	6.33858	2.319e-10	0.952684	9.54792e-12	108
RAB9B	0.940311	-0.326754	1.26707	1.98084e-07	6.28744	3.22744e-10	0.920477	9.64629e-12	26
CENPF	5.40987	6.40304	-0.993167	1.26727e-09	-6.16188	7.18855e-10	-0.634439	9.8087e-12	233
EVL	5.37478	4.33564	1.03914	1.20078e-10	6.67764	2.42818e-11	1.04368	9.98522e-12	24
VENTX	-1.05601	-1.73242	0.676415	0.000200163	6.43195	1.25976e-10	0.987727	9.9953e-12	43
FRY	4.45392	3.77951	0.674408	7.67422e-06	6.48155	9.07879e-11	1.03114	1.01276e-11	217
KCNK2	-0.350927	-2.25092	1.89999	1.61284e-08	6.6281	3.40035e-11	1.10016	1.02037e-11	13
YPEL5	5.64532	5.22465	0.420674	5.57157e-09	6.4963	8.2319e-11	0.906987	1.02219e-11	66
FANCE	2.16502	2.7289	-0.563877	3.81104e-08	-6.39969	1.5569e-10	-0.955792	1.04297e-11	54
SETBP1	4.19793	2.722	1.47593	4.12833e-11	6.43173	1.26158e-10	0.985562	1.05895e-11	59
MEIS2	4.1749	3.53855	0.636352	0.00037495	6.44789	1.1342e-10	0.815602	1.06543e-11	58
PTPRF	7.94673	8.56122	-0.614492	4.27184e-06	-6.34634	2.20501e-10	-1.06411	1.0704e-11	70
CARD14	1.36062	2.35861	-0.997985	0.000178405	-6.40148	1.53883e-10	-0.841729	1.07446e-11	69
HOXB2	3.3158	2.30033	1.01547	3.8098e-07	6.64287	3.07637e-11	1.08354	1.09091e-11	25
GPBAR1	2.19824	0.974747	1.22349	9.13068e-08	6.47023	9.78528e-11	1.08931	1.1037e-11	30
CHRNA1	-0.827575	-0.835003	0.00742815	0.974671	-6.43469	1.23722e-10	-0.569802	1.11436e-11	51
HNF1B	3.85318	4.55544	-0.702259	0.00504633	-6.21059	5.27855e-10	-0.94212	1.12172e-11	195
DPF3	-0.35569	-0.946766	0.591076	0.000350154	6.53827	6.22334e-11	1.11811	1.12673e-11	129
ZNF655	5.02822	4.51906	0.509153	0.00885451	6.39008	1.658e-10	1.05801	1.15934e-11	49
WASF2	7.57891	7.2935	0.28542	7.79849e-05	6.39029	1.65573e-10	0.892267	1.16088e-11	75
CMKLR1	3.82225	2.78668	1.03557	3.77021e-08	6.92152	4.46827e-12	1.0954	1.17186e-11	16
DOK5	0.984514	-0.21099	1.1955	4.75841e-09	6.52292	6.8952e-11	1.08711	1.1838e-11	39
CRYAB	4.18725	2.43886	1.74839	2.76638e-11	6.33229	2.41552e-10	0.952818	1.20388e-11	51
EID3	-0.206621	-0.75586	0.549239	2.16722e-06	6.36898	1.90294e-10	0.964584	1.23003e-11	221
FOXD2	1.85191	2.65096	-0.799049	1.62563e-05	-6.58212	4.63779e-11	-0.699066	1.23371e-11	125
GPR35	4.74196	5.45433	-0.712372	8.80212e-06	-6.24271	4.3005e-10	-0.890327	1.23561e-11	93
ZBED4	4.89437	5.20438	-0.310005	0.000651293	-6.3761	1.8166e-10	-0.887073	1.2517e-11	145
TADA1	3.54065	3.76006	-0.21941	0.000505552	-6.56775	5.10828e-11	-1.13244	1.2522e-11	290
PDE3A	4.36379	3.0863	1.27748	2.06884e-07	6.31731	2.66153e-10	0.992262	1.25859e-11	36
CD79B	2.24215	0.496005	1.74614	8.68343e-10	6.52122	6.97383e-11	1.13915	1.27696e-11	26
IDH1	6.20882	7.03118	-0.822354	3.62058e-11	-6.36036	2.01285e-10	-0.969358	1.31595e-11	58
ZDHHC15	0.054066	-1.29167	1.34573	1.05205e-08	6.30368	2.90654e-10	1.00846	1.32435e-11	98
TLE4	4.32047	3.7918	0.528664	0.000242876	6.38689	1.69295e-10	0.672206	1.34999e-11	39
GALR3	-4.20075	-3.71584	-0.484918	0.00156435	-6.65693	2.79605e-11	-1.04224	1.35534e-11	45
ZNF28	3.83571	4.31251	-0.476793	0.00225488	-6.50895	7.5678e-11	-0.992532	1.35695e-11	57
RRAGB	2.80212	2.37299	0.429127	2.02496e-05	6.367	1.92757e-10	0.931391	1.38158e-11	32
GPRC5D	-1.10014	-0.510345	-0.589792	0.000712258	-6.34316	2.25095e-10	-0.822726	1.39674e-11	71
ZNF880	1.76863	1.11025	0.658382	0.00403614	6.41381	1.41928e-10	1.06612	1.44049e-11	91
RAP1GAP2	4.67521	5.23703	-0.561818	1.51712e-05	-6.52008	7.02684e-11	-1.05065	1.44148e-11	62
CAV1	6.2922	5.14753	1.14468	5.99215e-09	6.41687	1.39109e-10	1.01946	1.46949e-11	13
ERBB2	7.01257	8.26336	-1.25079	1.05421e-06	-6.0714	1.26796e-09	-0.997029	1.49956e-11	44
PTCH2	2.16709	0.606148	1.56095	7.16055e-10	6.22981	4.67004e-10	1.11176	1.50135e-11	44
ROR2	3.90573	2.30383	1.6019	1.91211e-09	6.35274	2.11509e-10	1.06206	1.5166e-11	28
PKD2	4.97469	4.09478	0.879907	1.51122e-10	6.44316	1.17009e-10	1.02626	1.55141e-11	58
TBC1D9	4.83176	4.1872	0.644555	9.23082e-07	6.29793	3.01651e-10	1.07668	1.57298e-11	32
TENM4	3.04095	1.67285	1.3681	1.58528e-07	6.65521	2.829e-11	1.01234	1.59296e-11	45
CYP27B1	0.664671	1.53151	-0.866839	5.2072e-07	-6.4861	8.80843e-11	-0.777446	1.61056e-11	36
ZSWIM6	4.43868	4.15592	0.282761	0.000569331	6.31006	2.78935e-10	0.876585	1.68268e-11	153
ARFGEF2	6.13696	6.76772	-0.630763	6.48601e-11	-6.57509	4.86247e-11	-0.916047	1.68975e-11	91
ZNF677	1.86015	0.551968	1.30819	4.064e-11	6.5132	7.35677e-11	0.986312	1.69122e-11	39
P2RY12	-0.737741	-2.32864	1.5909	9.44987e-11	6.28164	3.35024e-10	1.0427	1.69395e-11	7
GPR68	3.17474	2.26424	0.910508	7.02238e-09	6.42759	1.29645e-10	1.1188	1.70835e-11	23
ZNF69	1.77359	2.0511	-0.277514	0.0798921	-6.7337	1.65406e-11	-0.911371	1.72817e-11	92
ZNF454	-0.613997	-1.87386	1.25986	1.10016e-11	6.24532	4.22946e-10	1.03525	1.7447e-11	37
RNF43	4.41737	5.55853	-1.14116	1.1045e-05	-6.4835	8.96199e-11	-0.9103	1.78074e-11	74
TRIM27	5.53398	5.86318	-0.329201	1.65804e-07	-6.50261	7.89395e-11	-0.911354	1.79595e-11	48
GRIK3	-0.319034	-1.79314	1.47411	5.91287e-06	6.35701	2.0572e-10	0.837897	1.79917e-11	26
MYBL2	5.24545	6.43897	-1.19351	1.75915e-10	-6.10096	1.05432e-09	-0.687746	1.90282e-11	120
CEACAM1	5.25895	6.15733	-0.898378	1.68244e-05	-6.3593	2.02678e-10	-0.712767	1.91971e-11	49
GPR182	-2.30518	-3.02397	0.718787	1.1244e-05	6.49137	8.50619e-11	1.09002	1.9404e-11	19
STAT5A	5.32181	4.83365	0.488152	7.21057e-05	6.54654	5.88859e-11	1.05342	1.9535e-11	97
RGMA	4.83922	2.87208	1.96714	1.59428e-08	6.23093	4.63683e-10	1.00494	1.95463e-11	66
HEY1	2.24727	1.83377	0.413497	0.00357873	6.29289	3.11607e-10	1.04795	1.95514e-11	25
ADRA1A	-1.76395	-2.97922	1.21527	1.02801e-10	6.25099	4.07863e-10	0.840068	1.96074e-11	17
DLX1	-3.08592	-3.1591	0.0731816	0.775059	6.31492	2.70307e-10	0.835707	1.97792e-11	81
EBF3	1.35162	0.235262	1.11636	5.61822e-08	6.43616	1.22533e-10	1.07633	1.9893e-11	25
TRIM55	-2.67888	-3.71372	1.03484	1.58146e-06	6.39075	1.65076e-10	0.850318	2.00251e-11	28
LMO3	1.65132	0.316221	1.3351	1.91493e-06	6.3138	2.72258e-10	1.05187	2.00355e-11	304
SMARCD3	3.13389	2.37335	0.760532	5.83918e-06	6.41992	1.36344e-10	0.999361	2.01661e-11	233
NUFIP1	2.88364	3.23867	-0.355031	0.000157357	-6.83049	8.46224e-12	-0.984146	2.03303e-11	103
TIMELESS	4.54866	5.28009	-0.731438	5.27374e-10	-6.18732	6.11954e-10	-0.687032	2.04368e-11	99
MAGI2	2.03241	1.07976	0.952657	3.35314e-07	6.38354	1.73039e-10	0.978654	2.06857e-11	52
CREB5	2.83595	1.91103	0.924929	3.09497e-06	6.44532	1.15355e-10	0.95287	2.07817e-11	53
PDK4	5.52744	4.45994	1.0675	0.000293951	6.16721	6.95046e-10	0.875912	2.09012e-11	18
ARHGEF9	4.30171	3.79128	0.510434	6.83076e-06	6.00829	1.8749e-09	0.839525	2.09877e-11	15
IL15	2.25176	1.6417	0.610052	2.41968e-05	6.92045	4.50205e-12	1.04722	2.11717e-11	68
ZNF468	3.95329	4.48276	-0.529467	0.00015329	-6.4692	9.85235e-11	-0.883626	2.12889e-11	54
RASL12	3.45672	2.47832	0.978394	1.35325e-08	6.46031	1.04487e-10	1.07231	2.14182e-11	40
STAP1	0.122721	-1.46605	1.58877	1.53414e-08	6.2561	3.94733e-10	1.10038	2.14932e-11	9
LY96	2.60979	1.5791	1.03069	4.18857e-09	6.83616	8.13428e-12	1.0888	2.14981e-11	18
WNT3A	-3.90043	-3.40358	-0.496854	0.0184449	-6.84473	7.66214e-12	-0.998844	2.15914e-11	108
EGR3	3.22349	2.72573	0.497753	0.0205952	6.41842	1.37696e-10	0.922674	2.16954e-11	37
TNNI2	-0.625033	-1.23184	0.60681	0.00780699	6.5468	5.8783e-11	1.0998	2.23942e-11	226
ADCYAP1	-0.321995	-1.85781	1.53581	4.99287e-07	6.38999	1.65897e-10	0.977146	2.25044e-11	14
ZNF384	5.65297	5.71025	-0.0572804	0.397195	-6.56389	5.24225e-11	-0.995157	2.28261e-11	55
HDGF	7.84202	8.4154	-0.573373	4.09716e-09	-6.51982	7.03907e-11	-0.987055	2.29439e-11	67
LYL1	2.5872	1.47149	1.11571	6.3885e-11	6.32251	2.57345e-10	1.09103	2.33187e-11	175
CDCA7	4.863	5.73354	-0.870538	9.1627e-06	-6.22086	4.94449e-10	-0.720089	2.35374e-11	81
KHDRBS2	-2.94052	-3.80043	0.859905	6.34535e-05	6.09888	1.06813e-09	1.06291	2.48907e-11	174
GPR155	3.93761	3.00429	0.933324	6.31158e-06	6.29945	2.987e-10	0.770789	2.50859e-11	58
MUSK	-0.497989	-1.92519	1.4272	5.61692e-06	6.09579	1.08901e-09	1.03022	2.53654e-11	30
RGS9	0.637636	-0.58811	1.22575	3.93214e-08	6.16533	7.03342e-10	0.856371	2.56616e-11	26
ABCG1	4.34403	3.86285	0.48118	0.000959684	6.54921	5.78441e-11	1.12656	2.61657e-11	166
RASGRP4	1.39157	0.469134	0.922439	9.99443e-08	6.47582	9.42965e-11	1.05966	2.61999e-11	26
PTPRM	5.20563	4.39189	0.813746	2.52765e-08	6.32215	2.57955e-10	1.02523	2.66149e-11	40
CNKSR2	0.115371	-1.84695	1.96232	1.19669e-08	6.17261	6.71721e-10	1.01523	2.7819e-11	35
SMPD2	3.20007	3.64366	-0.443592	0.000118239	-6.51425	7.3055e-11	-1.00793	2.85945e-11	40
TFRC	6.66248	7.62641	-0.963934	8.19694e-10	-6.14788	7.85234e-10	-0.808187	2.86336e-11	46
KLHL12	4.69012	4.95259	-0.262463	0.000146506	-6.34047	2.29064e-10	-1.06181	2.87183e-11	36
TCEAL2	0.113021	-1.81377	1.92679	1.16007e-05	6.14457	8.0178e-10	0.95924	2.92403e-11	338
E2F1	3.5593	4.32098	-0.761678	8.22711e-08	-6.11681	9.54663e-10	-0.738736	2.9331e-11	134
ISL2	1.01132	-0.10936	1.12068	1.64686e-08	6.03931	1.54778e-09	1.00832	2.96996e-11	39
RORA	3.88563	3.14727	0.738354	1.45423e-06	6.3591	2.02943e-10	1.0786	2.96998e-11	82
MAFB	5.31765	4.22464	1.09301	1.02442e-09	6.61961	3.60149e-11	1.0258	2.99324e-11	87
CNTNAP1	4.14975	3.22347	0.926281	1.24862e-06	6.23286	4.57992e-10	1.05506	3.00159e-11	18
PDE2A	3.05157	1.9244	1.12717	3.73344e-09	6.25939	3.86496e-10	0.942683	3.03626e-11	61
RAP1B	6.97027	6.7993	0.170971	0.0346071	6.54918	5.78546e-11	0.899862	3.08679e-11	70
EPHA5	-2.10503	-3.24182	1.13679	1.28611e-06	6.57218	4.95834e-11	0.846903	3.09001e-11	17
ING4	3.57519	3.26692	0.308267	0.000343925	6.50343	7.8508e-11	0.819426	3.11032e-11	25
PSRC1	1.88428	2.74966	-0.865381	7.37129e-09	-6.43193	1.25994e-10	-0.957519	3.15027e-11	79
FZD4	4.87643	4.25608	0.62035	1.14304e-06	6.34988	2.15477e-10	1.05495	3.17721e-11	23
ZIK1	0.840548	-0.167192	1.00774	5.10569e-07	6.28724	3.23163e-10	1.0796	3.1973e-11	31
RAB32	3.92222	3.22662	0.695598	2.02533e-05	6.4019	1.53458e-10	1.05383	3.29294e-11	34
PEG3	1.6291	0.101335	1.52776	1.29547e-08	6.19667	5.76691e-10	0.951224	3.34647e-11	127
HMGCR	5.01112	5.69113	-0.680005	2.66367e-08	-6.28437	3.29187e-10	-1.01961	3.37294e-11	75
FANCD2	3.43765	4.23366	-0.796014	2.05481e-09	-6.08836	1.14073e-09	-0.707442	3.40522e-11	54
NFIX	7.08676	6.59628	0.490485	0.0004011	6.24251	4.30614e-10	0.913949	3.40563e-11	117
CNKSR1	3.64933	4.54103	-0.891705	1.69961e-10	-5.99143	2.08005e-09	-0.950245	3.42846e-11	29
SOX10	-0.565455	-2.74216	2.1767	1.12065e-07	5.97989	2.23289e-09	0.907767	3.49601e-11	148
ARL4D	1.07145	0.0770012	0.994444	4.096e-05	6.00132	1.95715e-09	0.868565	3.50875e-11	17
CBFA2T3	2.71479	1.55619	1.1586	1.64813e-07	6.30681	2.84843e-10	1.04391	3.66447e-11	80
RALGPS1	4.36323	4.72295	-0.359724	0.00252638	-6.66974	2.56255e-11	-1.01822	3.66789e-11	49
IL6R	4.306	3.6809	0.625105	6.82004e-05	6.27426	3.51294e-10	0.81388	3.67567e-11	25
ITPKB	5.73305	4.74613	0.986924	9.15601e-10	6.17199	6.74366e-10	0.911119	3.68787e-11	19
KLRF1	-1.85556	-2.83932	0.983764	7.39042e-08	6.38259	1.74114e-10	0.969997	3.6999e-11	28
CAND2	1.87549	0.616277	1.25921	1.38859e-06	6.11017	9.95274e-10	0.968767	3.71251e-11	408
MCM3	6.2486	6.78132	-0.532726	6.46316e-07	-6.15159	7.67096e-10	-0.786002	3.76233e-11	60
ZNF692	3.34881	3.74966	-0.400853	4.03191e-06	-6.30372	2.90576e-10	-0.846026	3.76661e-11	101
FGF13	1.11593	0.383837	0.732096	0.00453911	6.50523	7.75742e-11	0.84474	3.80156e-11	31
TRIB3	3.07033	4.31049	-1.24016	7.15291e-07	-6.42735	1.29849e-10	-0.967529	3.83438e-11	69
TCEAL6	-3.7073	-4.61518	0.907873	2.47952e-08	6.04542	1.49023e-09	0.861876	3.98095e-11	52
SAP30L	4.8676	4.57193	0.295671	0.000161183	6.40236	1.52993e-10	1.01334	4.0209e-11	186
FLT3LG	2.77479	1.79784	0.976959	6.22409e-12	6.50585	7.72566e-11	0.998062	4.04292e-11	35
AGTR1	0.163825	-1.97378	2.1376	2.98853e-08	6.03793	1.56108e-09	0.98497	4.21299e-11	42
TRPS1	3.94962	3.09695	0.852674	4.55148e-05	6.32547	2.52462e-10	0.843636	4.24522e-11	46
LEPR	3.68365	2.62946	1.05419	4.78214e-08	6.18411	6.24546e-10	0.940561	4.3645e-11	20
TBC1D19	1.83305	1.24227	0.590779	5.16668e-08	6.37015	1.88847e-10	0.883383	4.39056e-11	61
RHPN2	5.57838	6.44461	-0.866226	1.59635e-05	-6.14773	7.85993e-10	-0.841407	4.41788e-11	72
MNX1	1.65651	2.52286	-0.866353	1.16179e-06	-6.46253	1.02966e-10	-0.832175	4.42624e-11	69
KREMEN2	-1.23859	-0.262096	-0.976498	4.09648e-05	-6.14835	7.82943e-10	-0.834906	4.43008e-11	35
CALY	-1.83504	-2.90298	1.06794	9.83794e-05	6.31841	2.64266e-10	0.664382	4.45745e-11	26
FANCF	3.76925	4.17576	-0.406506	2.82423e-07	-6.71583	1.86993e-11	-0.873968	4.48274e-11	50
ZFP2	-0.263883	-0.859605	0.595722	0.0002649	6.23663	4.47111e-10	0.777663	4.48368e-11	58
IRX1	-3.66136	-4.30045	0.639091	2.3797e-05	6.31406	2.71802e-10	1.01456	4.54297e-11	65
TFB2M	3.44928	4.01816	-0.568877	9.64873e-10	-6.4707	9.75488e-11	-0.9329	4.58376e-11	107
NFYA	4.54205	5.00656	-0.464505	5.40791e-07	-6.56159	5.32357e-11	-0.851283	4.68575e-11	36
IL10	-0.498906	-1.24734	0.748431	0.000218904	6.50359	7.84258e-11	1.0731	4.72609e-11	230
ZFYVE1	4.23314	3.92592	0.307222	1.3137e-05	6.28799	3.2161e-10	0.815981	4.73481e-11	128
KLF8	2.00605	0.961918	1.04413	8.35289e-09	6.35189	2.12687e-10	0.881784	4.75596e-11	53
TCF4	5.94802	5.07803	0.869981	1.00233e-09	6.24562	4.2213e-10	1.0388	4.76131e-11	46
MS4A7	4.43648	3.13783	1.29865	1.80304e-11	6.77991	1.20254e-11	1.06925	4.86364e-11	12
NDC80	2.92886	3.73125	-0.802394	1.82677e-08	-6.13724	8.3967e-10	-0.723493	4.88744e-11	34
RGS22	-1.84507	-3.04194	1.19688	1.24384e-07	6.2482	4.15221e-10	0.976919	4.96655e-11	25
RBFOX2	6.30638	5.85563	0.45075	1.74836e-07	6.1491	7.79221e-10	0.926114	4.97256e-11	30
EFS	2.32769	1.22155	1.10615	1.10647e-08	6.41902	1.37154e-10	0.990212	5.02524e-11	27
ZNF580	4.75301	4.36462	0.388391	0.000131941	6.25645	3.93841e-10	0.886846	5.07268e-11	65
YY1	6.65363	6.72824	-0.0746074	0.102483	-6.25586	3.95341e-10	-0.872712	5.1449e-11	46
NTRK1	-1.43173	-2.14767	0.715938	8.48144e-05	6.45249	1.10029e-10	1.14499	5.24056e-11	21
PLAGL2	5.4252	6.072	-0.646801	1.65477e-06	-6.89346	5.44521e-12	-0.989363	5.35877e-11	150
DIRAS3	0.226075	-0.423161	0.649236	0.013814	6.0454	1.49041e-09	0.92834	5.40958e-11	24
PIM1	5.14025	4.84747	0.29278	0.0203956	6.18597	6.17208e-10	0.865354	5.41131e-11	184
ZNF25	3.31691	2.52437	0.792541	3.8814e-11	6.13957	8.27444e-10	0.95649	5.48172e-11	126
NRXN1	-0.174629	-2.08582	1.91119	6.25124e-08	6.00603	1.90127e-09	0.864649	5.58804e-11	42
DHCR24	6.49683	7.75206	-1.25523	1.65652e-12	-6.26784	3.66079e-10	-0.944182	5.61512e-11	70
CD48	4.08692	2.74953	1.33739	1.17488e-09	6.46104	1.03984e-10	1.06828	5.77051e-11	24
HCAR1	-0.344172	0.145881	-0.490052	0.174929	-6.54782	5.83843e-11	-0.83994	5.81504e-11	37
IL11RA	1.85298	1.19275	0.660232	5.81671e-07	6.07803	1.2167e-09	0.676929	5.83644e-11	25
IKZF4	3.60112	3.27389	0.327222	0.00022554	6.1225	9.21158e-10	1.01685	5.86009e-11	103
LBH	5.72768	5.08183	0.645851	8.15509e-06	6.15815	7.35975e-10	1.09137	5.89335e-11	321
SATB2	2.35042	3.13323	-0.782812	0.000196035	-6.3895	1.66434e-10	-0.707849	6.1876e-11	103
SNX29	4.94377	4.19422	0.749553	5.10919e-13	6.16624	6.99337e-10	1.02788	6.19802e-11	37
CAMK2A	-0.997804	-2.20561	1.2078	1.7088e-07	6.00595	1.90218e-09	0.901106	6.20901e-11	116
SOX17	1.9445	0.987113	0.957388	1.72875e-08	6.27075	3.5932e-10	0.99037	6.23928e-11	135
EYA4	0.0393656	-0.771927	0.811292	0.00381468	6.30402	2.90028e-10	1.03217	6.35002e-11	221
PTPRC	6.11208	4.85542	1.25666	3.21821e-08	6.37661	1.81056e-10	1.06018	6.43983e-11	30
IRF2BP2	7.54575	7.8199	-0.274143	0.00027759	-6.51948	7.05516e-11	-1.04895	6.46997e-11	376
BID	4.61557	4.97682	-0.361251	0.000413877	-6.43863	1.20554e-10	-0.801828	6.51795e-11	50
HOPX	4.27228	3.02042	1.25186	4.71947e-07	6.26027	3.843e-10	1.05208	6.83013e-11	45
PPP1R12B	7.31389	5.97202	1.34186	1.59462e-07	5.84156	5.1714e-09	0.974608	6.83667e-11	31
PDE10A	2.68632	1.91387	0.77245	0.000191324	6.36085	2.00644e-10	0.707269	6.86916e-11	15
TBC1D30	2.98617	3.69248	-0.706313	2.34997e-06	-6.11234	9.81826e-10	-0.795626	6.90713e-11	53
MS4A14	0.93766	-0.197465	1.13513	5.58977e-10	6.62506	3.47106e-11	0.972836	7.02529e-11	17
RNF14	4.77799	4.60075	0.177246	0.00743613	6.44006	1.19424e-10	0.754354	7.03002e-11	46
RASSF8	3.9317	2.73172	1.19998	1.89384e-08	6.11337	9.75518e-10	0.990023	7.14139e-11	52
PAK6	1.73329	2.70301	-0.96972	0.000211637	-5.9502	2.67815e-09	-0.816898	7.22114e-11	37
CNTLN	2.61982	1.84713	0.77269	9.17731e-06	6.20703	5.3994e-10	0.971007	7.56012e-11	52
ARHGAP25	3.85878	2.70658	1.1522	5.27157e-11	6.56709	5.13097e-11	1.06214	7.5788e-11	22
PRKCZ	4.20279	4.85115	-0.648359	1.36043e-08	-5.99943	1.98007e-09	-0.964032	7.74634e-11	47
E2F8	3.247	4.08488	-0.837878	1.79854e-07	-6.06469	1.32207e-09	-0.785132	7.81257e-11	63
DEPDC1B	3.06511	3.80221	-0.737092	3.54003e-06	-6.01263	1.82534e-09	-0.605862	7.82262e-11	27
ERG	3.77881	2.84589	0.932919	3.83493e-10	6.21831	5.02537e-10	1.0611	7.94838e-11	93
GREM1	7.96712	6.2533	1.71382	5.32962e-07	6.35386	2.09973e-10	1.05803	7.98743e-11	23
NCAM1	2.76616	1.15372	1.61244	3.55966e-09	6.2198	4.97802e-10	0.833295	8.13912e-11	30
KLRG1	0.444524	-0.560514	1.00504	1.87509e-09	6.15172	7.66447e-10	1.12449	8.16186e-11	13
LGALS1	7.28636	6.37161	0.914751	8.07089e-08	6.20893	5.33473e-10	1.00503	8.25875e-11	80
ZCWPW2	-1.19178	-1.72173	0.52995	0.000313545	5.97944	2.23902e-09	0.780047	8.31321e-11	83
CREB3L2	6.55625	6.21161	0.34464	0.00115379	6.25065	4.08749e-10	0.971637	8.3569e-11	50
ZBTB16	1.32981	-0.288431	1.61824	2.33552e-07	5.99992	1.97418e-09	0.847854	8.40384e-11	145
SREBF2	7.19298	7.62229	-0.429314	1.84516e-05	-6.35369	2.1021e-10	-0.903791	8.42215e-11	96
MCM4	5.93306	6.54281	-0.609754	6.51658e-06	-6.05439	1.40947e-09	-0.698348	8.65316e-11	91
CSDC2	1.08026	-0.345921	1.42618	1.31481e-08	6.22124	4.93239e-10	1.04999	8.68498e-11	196
GATA2	2.50242	1.93539	0.567034	0.00155565	6.22712	4.75083e-10	0.97611	8.70902e-11	44
GMEB2	4.17125	4.64356	-0.472306	4.85316e-09	-6.51385	7.32467e-11	-0.981409	8.78078e-11	145
GNGT2	0.480444	-0.4501	0.930545	4.23458e-09	6.45906	1.05354e-10	1.0133	8.87845e-11	18
PTGIS	4.81109	2.84618	1.96491	7.79107e-08	6.16971	6.84148e-10	1.04699	8.88188e-11	20
ZNF138	2.71712	3.03885	-0.321727	0.000770477	-6.08331	1.17729e-09	-0.939892	9.00184e-11	72
EPHB4	6.2839	6.76394	-0.48004	2.11057e-05	-6.02463	1.69498e-09	-0.707244	9.13558e-11	69
TCEAL3	3.41944	2.54741	0.872031	1.00786e-07	6.12222	9.22786e-10	0.828969	9.15924e-11	156
PHF21A	5.01281	4.51025	0.502567	6.01144e-09	6.16881	6.88056e-10	0.913028	9.31525e-11	66
TTK	3.09462	4.14914	-1.05451	3.27937e-10	-6.07567	1.23468e-09	-0.644192	9.37362e-11	68
FGFR1	5.78362	4.68058	1.10304	7.49257e-09	6.11664	9.55677e-10	0.983737	9.43791e-11	64
RBPMS	6.39856	5.6008	0.797757	2.90831e-06	6.11162	9.86263e-10	0.874981	9.48481e-11	140
FUBP1	6.01633	6.1452	-0.128869	0.0518255	-6.13722	8.39784e-10	-0.809658	9.5255e-11	72
ARHGAP10	3.93893	3.20711	0.731814	6.59399e-06	6.04064	1.53505e-09	0.919412	9.54605e-11	21
CAP2	3.11663	2.22472	0.891906	0.000204241	5.77586	7.65619e-09	0.928269	9.7042e-11	51
GMCL1	4.74785	5.17425	-0.426404	2.21634e-08	-6.26768	3.66458e-10	-0.890357	9.83943e-11	111
DACT1	3.92946	2.99898	0.930476	4.83954e-06	6.22705	4.75308e-10	0.989543	9.90005e-11	33
EPHA4	2.90482	2.08277	0.822047	0.000354476	5.9817	2.20819e-09	0.934941	9.98723e-11	28
MYOCD	3.64219	1.93438	1.70781	5.3813e-08	5.85618	4.73621e-09	0.945841	1.00177e-10	304
PUF60	6.4053	6.72749	-0.322189	0.000398105	-6.23541	4.50595e-10	-1.01866	1.01397e-10	154
CNTN1	1.93295	-0.186034	2.11898	3.57631e-07	6.18215	6.3234e-10	0.932427	1.01446e-10	32
TRIM23	2.80285	2.31975	0.483097	1.56794e-09	6.15707	7.4104e-10	0.94092	1.01548e-10	72
ZNF367	3.30638	3.71341	-0.40703	0.00110588	-6.07005	1.27873e-09	-0.709532	1.01854e-10	117
PDE4D	4.8397	4.11546	0.724241	4.63568e-06	6.32308	2.56397e-10	1.03126	1.0328e-10	56
PTGIR	1.88002	1.11093	0.76909	1.11261e-06	6.203	5.5396e-10	1.0455	1.03333e-10	28
EBF2	0.755343	-0.38857	1.14391	9.91879e-07	5.90729	3.4779e-09	0.949702	1.03496e-10	53
CTBP2	6.48553	6.8116	-0.326067	0.0010511	-6.23695	4.46196e-10	-0.925344	1.03911e-10	38
PRKCH	4.53292	3.99888	0.534044	1.38488e-05	6.06974	1.28121e-09	1.10388	1.04893e-10	14
PGR	1.55755	-0.0339584	1.59151	2.12838e-10	5.98134	2.21311e-09	0.933738	1.05014e-10	103
THBS1	8.53036	7.53044	0.99992	2.25858e-07	6.25438	3.99105e-10	0.92537	1.05659e-10	33
PLCXD3	0.163788	-1.59218	1.75596	9.81317e-08	6.0245	1.69635e-09	0.741902	1.05802e-10	29
AMFR	6.23834	6.01803	0.220309	0.00339039	6.57589	4.83641e-11	0.982287	1.07652e-10	54
TXNRD1	6.43084	6.67443	-0.243588	0.0126112	-6.13418	8.56016e-10	-0.881536	1.08482e-10	52
PSIP1	5.7363	5.36115	0.375157	0.000205363	5.94899	2.6981e-09	0.921519	1.09632e-10	173
ETS1	6.7903	6.00266	0.787637	7.28692e-10	6.13115	8.72455e-10	0.960651	1.09767e-10	67
MYB	3.53057	4.35476	-0.824194	0.000371725	-6.2204	4.95883e-10	-0.72443	1.11398e-10	143
DLC1	5.33484	4.53915	0.795688	2.38317e-08	5.88675	3.93867e-09	1.02074	1.15354e-10	14
NFIA	6.21789	5.64237	0.575521	7.05467e-05	6.07297	1.25567e-09	0.920501	1.15766e-10	66
ZNF26	3.38988	3.47468	-0.0848016	0.363309	5.99888	1.98684e-09	1.09203	1.16046e-10	61
AKAP12	5.77863	4.23382	1.54482	1.0089e-10	6.01368	1.8136e-09	0.962966	1.16599e-10	20
GLIS3	3.68105	3.28621	0.394846	0.0857392	6.22541	4.80313e-10	1.03471	1.17468e-10	77
PPRC1	5.74624	6.01788	-0.271639	0.000342385	-6.26174	3.80704e-10	-0.883666	1.19145e-10	122
PLEKHG2	5.4675	5.04951	0.417987	0.000301975	5.83578	5.35407e-09	0.904072	1.19588e-10	41
DNAJB6	6.0779	6.05465	0.0232433	0.731883	5.95826	2.5493e-09	0.903034	1.19707e-10	186
FLNA	10.7354	9.36767	1.36777	3.00622e-09	5.84725	4.99765e-09	0.916611	1.20984e-10	56
PER3	4.69005	4.17956	0.510496	0.00512923	6.09525	1.09268e-09	0.844951	1.23232e-10	41
TCEAL1	3.3641	2.80317	0.560931	1.32255e-05	6.07945	1.20594e-09	0.814277	1.23274e-10	77
MS4A2	1.13893	-0.0354896	1.17442	1.3049e-05	6.05703	1.38655e-09	0.947737	1.25306e-10	58
PDE4B	4.51934	3.56895	0.950385	1.55772e-07	6.41587	1.40023e-10	0.968189	1.27937e-10	15
ENPP2	4.91619	3.91637	0.99982	2.42392e-07	6.23952	4.38924e-10	0.90861	1.28021e-10	17
ZDHHC5	6.80434	6.98577	-0.181435	0.00309377	-6.06286	1.3372e-09	-0.830771	1.28923e-10	79
RAB39B	0.0435522	-0.976952	1.0205	7.49967e-06	6.30642	2.85568e-10	1.04758	1.29897e-10	19
ZNF826P	1.05734	0.262398	0.794942	0.00170244	6.17116	6.77888e-10	1.06457	1.3044e-10	35
TOX2	2.50119	1.67759	0.823599	4.66627e-08	6.12998	8.78914e-10	1.06769	1.30616e-10	37
EML4	6.46462	6.82233	-0.357706	5.96442e-05	-6.36721	1.925e-10	-0.786696	1.32468e-10	101
WLS	5.82775	5.42167	0.406079	0.00767385	5.95412	2.6148e-09	0.901013	1.33503e-10	28
P2RX7	2.80171	1.73025	1.07146	1.00104e-08	6.42474	1.32099e-10	1.06372	1.34688e-10	13
NFIC	7.72212	7.09515	0.626973	6.53816e-07	6.00042	1.96811e-09	0.860421	1.34895e-10	229
RCAN1	5.04548	4.75569	0.289786	0.00881108	6.04446	1.49908e-09	0.982022	1.36434e-10	72
POU2F2	4.42345	3.31577	1.10768	9.6374e-09	6.01478	1.80132e-09	1.10115	1.37088e-10	108
DDR1	7.24704	8.06359	-0.816544	2.96542e-08	-5.75785	8.51896e-09	-0.944466	1.395e-10	61
TGFB1I1	5.82747	4.6983	1.12917	1.37976e-09	5.99256	2.06565e-09	0.952163	1.44578e-10	66
ARHGAP27	5.41662	5.81533	-0.398717	0.000460423	-6.0312	1.62747e-09	-0.909049	1.44633e-10	57
DDIT4L	-0.730517	-1.92786	1.19734	6.17037e-06	5.9135	3.34923e-09	1.02168	1.4689e-10	15
LASP1	8.09564	8.43583	-0.340183	0.0011148	-6.10607	1.02111e-09	-0.887129	1.47945e-10	115
CAV2	5.27546	4.86884	0.406616	0.0373057	6.28974	3.18006e-10	0.945834	1.48543e-10	29
ADH1A	-2.39974	-3.17517	0.775432	0.0221642	6.08909	1.13555e-09	0.890477	1.49157e-10	119
ZNF823	2.40214	2.70601	-0.303867	0.000258155	-6.01351	1.81549e-09	-0.938256	1.49717e-10	92
HSP90AB1	9.65157	10.3271	-0.675573	1.36875e-11	-6.20704	5.39915e-10	-0.844475	1.50054e-10	29
NPAS4	-2.3073	-3.35202	1.04471	3.25839e-06	5.76941	7.95493e-09	0.865282	1.51345e-10	97
MYO10	6.64475	7.23502	-0.590267	2.4958e-06	-6.2227	4.88665e-10	-0.963377	1.52696e-10	77
CIT	4.24019	4.83023	-0.590039	4.50655e-07	-5.92611	3.10188e-09	-0.672483	1.53182e-10	37
LIFR	4.00701	3.22146	0.785547	0.00190502	6.21436	5.15335e-10	0.686059	1.5581e-10	31
GNAI2	8.20366	7.69603	0.507631	2.14471e-08	6.14038	8.23238e-10	1.03294	1.58427e-10	51
ZWINT	4.34992	5.0314	-0.681483	1.38139e-06	-5.87022	4.35215e-09	-0.780782	1.6018e-10	53
RFX2	3.61277	3.21753	0.395235	0.00403651	5.98194	2.20501e-09	0.852279	1.61235e-10	44
CCND1	6.99766	7.57856	-0.580907	9.50181e-05	-6.00904	1.86629e-09	-0.710042	1.61719e-10	45
GNAO1	3.51995	1.88821	1.63173	1.20863e-07	5.88352	4.01642e-09	0.918864	1.63252e-10	51
ZNF843	-0.41958	-1.2376	0.818023	1.13332e-06	6.09065	1.12455e-09	1.01996	1.65093e-10	30
SLC7A3	-3.25712	-3.80263	0.545504	0.00741914	5.90855	3.4513e-09	0.837042	1.66559e-10	27
PRPF6	6.2665	6.66459	-0.398086	1.00641e-07	-6.40536	1.50017e-10	-0.924205	1.7305e-10	110
SOX15	0.327216	-0.314673	0.641889	0.00499994	5.86038	4.6182e-09	0.825327	1.73482e-10	95
HCLS1	4.8721	3.81106	1.06103	1.83664e-09	6.30025	2.97159e-10	1.02843	1.73875e-10	177
MSC	3.35385	2.46843	0.885423	3.20977e-07	6.19432	5.85371e-10	1.04001	1.78691e-10	86
AR	1.70889	0.164095	1.5448	5.22719e-09	5.96069	2.51171e-09	0.927227	1.79673e-10	38
SCARB1	5.13825	5.83124	-0.692983	3.50368e-07	-6.12338	9.16107e-10	-0.95605	1.81972e-10	61
CENPI	1.73356	2.35088	-0.617322	3.52852e-06	-5.72731	1.02039e-08	-0.596013	1.82691e-10	31
ADCY5	3.7717	2.40288	1.36882	2.29032e-05	5.83042	5.52877e-09	0.905099	1.83243e-10	50
TGIF2	4.39181	4.61776	-0.225943	0.0286806	-6.15256	7.62423e-10	-0.905277	1.91178e-10	64
PIGU	4.72263	5.2244	-0.501768	1.78474e-06	-6.01025	1.85238e-09	-0.876634	1.9348e-10	94
RGS13	-0.0446839	-1.39966	1.35498	2.27507e-06	6.1042	1.03314e-09	0.966684	1.94169e-10	11
NPAS3	0.0944756	-1.19141	1.28588	6.06529e-08	5.95098	2.66549e-09	0.930942	1.96542e-10	60
ZNF610	-0.0450785	-0.635584	0.590505	0.00432369	6.03997	1.54144e-09	0.972186	1.99102e-10	18
DERL1	6.21215	6.31747	-0.105318	0.128127	-6.05374	1.41519e-09	-0.743557	2.0029e-10	106
BCL6	5.42519	4.83654	0.588652	1.30567e-06	6.14161	8.16884e-10	0.88937	2.02247e-10	54
NDFIP2	5.50003	5.97128	-0.471248	6.86577e-06	-6.01483	1.80076e-09	-0.809943	2.05296e-10	51
MORF4L1	7.12674	6.9731	0.153644	0.0099503	6.28464	3.28619e-10	0.908046	2.06716e-10	101
PREX2	3.37063	2.50554	0.865081	8.66376e-07	5.9527	2.63756e-09	1.01029	2.07989e-10	45
WWC1	5.02814	5.67888	-0.650746	3.63185e-06	-5.8883	3.90187e-09	-0.916548	2.10253e-10	293
ZNF804A	-0.0364155	-1.28607	1.24965	6.49905e-09	6.31334	2.73083e-10	1.04427	2.12659e-10	65
DTNA	2.50208	1.11571	1.38636	3.28554e-06	5.89658	3.71119e-09	0.918635	2.14604e-10	38
ZC3H3	5.07046	5.53366	-0.463195	4.10274e-07	-6.223	4.87737e-10	-0.94322	2.14836e-10	113
SFMBT1	3.89674	4.44837	-0.551628	8.73496e-09	-6.04614	1.48359e-09	-0.740185	2.1644e-10	100
EPHA1	3.8844	4.61579	-0.731388	2.05587e-05	-6.0075	1.88411e-09	-0.826596	2.18738e-10	54
SYDE1	4.29477	3.41094	0.883832	5.56244e-09	6.04622	1.48281e-09	1.00199	2.19254e-10	74
SHC3	1.36612	0.661369	0.704747	0.00236049	5.88127	4.07128e-09	0.957163	2.23238e-10	15
SSTR2	1.34253	0.546361	0.796164	2.75461e-06	5.92729	3.0797e-09	0.938841	2.24122e-10	21
HEXIM1	4.99082	4.80493	0.185885	0.0347052	6.06646	1.30762e-09	0.882664	2.25114e-10	109
LAT2	3.33939	2.33889	1.0005	1.56084e-10	6.36348	1.97229e-10	0.990409	2.28912e-10	15
BHLHE41	5.0695	4.38476	0.684733	0.00346632	6.16444	7.07322e-10	0.989102	2.39016e-10	63
RGS6	-0.624763	-1.45866	0.833901	0.00363404	5.88392	4.00653e-09	0.802208	2.41058e-10	23
CHN1	3.47264	2.85592	0.616712	4.69274e-05	5.73985	9.47626e-09	0.919308	2.42594e-10	39
ADCY2	1.51317	-0.125153	1.63832	4.8219e-08	5.99373	2.05082e-09	1.00163	2.4475e-10	26
DNAJA1	6.72188	7.05718	-0.335299	0.000403051	-6.27994	3.38701e-10	-0.899698	2.48083e-10	60
RUVBL1	4.65421	5.10734	-0.453136	9.4575e-07	-6.02853	1.65461e-09	-0.816185	2.48212e-10	121
ZFYVE27	4.22844	4.48092	-0.252475	0.00242843	-6.31947	2.62454e-10	-0.891765	2.49094e-10	66
ZNF7	3.94358	4.18842	-0.244841	0.000406389	-6.07389	1.24845e-09	-0.936579	2.5163e-10	73
TAF11	3.7823	3.99361	-0.211318	0.00152712	-6.43421	1.24113e-10	-1.013	2.54727e-10	173
KLF12	4.09318	3.12618	0.966997	6.68046e-07	5.95752	2.56091e-09	1.01924	2.55399e-10	76
IL10RA	4.86892	3.60176	1.26716	3.1092e-10	6.32426	2.54447e-10	1.08149	2.55989e-10	22
HES6	2.60111	3.32399	-0.722877	0.0001571	-6.15145	7.67764e-10	-0.936763	2.56232e-10	143
FCGR2C	1.83941	0.278438	1.56097	4.39122e-12	6.28517	3.27499e-10	1.07481	2.58125e-10	22
FST	1.2921	0.934708	0.357396	0.166832	5.96908	2.38588e-09	0.900065	2.59483e-10	105
ZNF423	3.4774	2.28992	1.18748	1.46061e-08	5.96833	2.3969e-09	0.981435	2.61252e-10	36
ZNF485	1.30851	1.58787	-0.279357	0.00955815	-5.99362	2.05222e-09	-0.688696	2.61261e-10	89
KLF5	7.38869	8.25015	-0.861459	1.78968e-07	-5.9627	2.48104e-09	-0.836935	2.6333e-10	84
KLF10	6.3982	6.01087	0.387329	6.72306e-05	6.04955	1.45252e-09	0.814647	2.63369e-10	54
PDIA3	8.825	9.18531	-0.360309	6.44256e-05	-6.1975	5.73669e-10	-0.814834	2.71468e-10	42
TRAF4	5.3692	6.05405	-0.684847	8.62258e-10	-6.05865	1.37271e-09	-0.93206	2.73633e-10	51
AGO2	6.25204	6.56672	-0.314675	0.000980428	-6.03832	1.55726e-09	-0.815221	2.74447e-10	128
UBE2C	4.54512	5.70562	-1.1605	3.46763e-10	-5.86864	4.39383e-09	-0.68739	2.77724e-10	52
DUSP22	4.61473	4.2564	0.358328	8.96455e-05	6.23479	4.5238e-10	0.828612	2.80346e-10	11
MKX	0.548574	-0.432495	0.981069	0.00204177	5.91005	3.42012e-09	0.971204	2.8135e-10	30
FGF10	0.903388	-0.859692	1.76308	2.88047e-08	5.65692	1.54113e-08	0.98937	2.83313e-10	20
DIXDC1	4.76002	3.59947	1.16055	1.12799e-10	5.78805	7.12077e-09	0.892496	2.83321e-10	41
OR5K2	-4.11789	-4.52004	0.402149	8.37434e-05	5.77511	7.69011e-09	0.893281	2.85752e-10	24
FOXM1	5.4244	6.22491	-0.800506	2.92212e-07	-5.7041	1.1696e-08	-0.588449	2.88451e-10	150
ZMAT1	1.77846	0.573485	1.20497	6.92798e-07	5.88968	3.86953e-09	0.828849	2.95557e-10	50
GTF2IRD2	2.88952	2.64424	0.245277	0.0528772	6.11096	9.90353e-10	0.7901	2.97882e-10	96
PLCD4	1.61093	0.953076	0.657854	5.89556e-06	5.69007	1.26985e-08	0.706865	3.01296e-10	24
ROR1	3.92663	3.22131	0.705317	0.000342859	6.00592	1.90253e-09	0.886012	3.04495e-10	46
ARHGAP22	1.46677	0.510205	0.956565	2.34219e-09	5.95464	2.6065e-09	1.02116	3.06281e-10	30
GPR146	1.81171	1.18136	0.630346	1.41894e-05	5.95058	2.67196e-09	0.760704	3.09203e-10	68
CNR1	1.53391	-0.434563	1.96848	4.41919e-07	6.04505	1.49361e-09	0.978092	3.13879e-10	30
FOXI2	-2.81828	-3.75371	0.935437	5.72403e-07	5.9119	3.38191e-09	0.722563	3.20624e-10	76
CLU	7.64304	6.92546	0.717583	0.0238382	6.00833	1.87448e-09	0.724622	3.22111e-10	43
GPR34	2.93474	1.71336	1.22138	1.62133e-10	6.30752	2.83535e-10	0.920271	3.22295e-10	35
ACAP1	3.30369	2.37513	0.928553	1.00833e-07	6.14604	7.9442e-10	1.05277	3.23517e-10	22
CCR10	0.613552	-0.0051752	0.618727	0.000936192	6.14975	7.76072e-10	0.935233	3.25e-10	71
CARD8	4.57011	4.04597	0.52414	2.06287e-08	5.97714	2.27086e-09	1.02001	3.31417e-10	61
SRPK1	6.03275	6.58043	-0.547677	3.40079e-08	-5.96726	2.41277e-09	-0.80349	3.42272e-10	52
HDX	0.646821	-0.322724	0.969544	3.23354e-07	6.22862	4.70555e-10	0.994216	3.42288e-10	32
E2F2	2.73745	3.49515	-0.757699	4.33026e-05	-5.90795	3.46395e-09	-0.840515	3.50284e-10	84
ZFP92	0.908066	0.166359	0.741708	0.000399039	6.21656	5.08184e-10	1.00494	3.5583e-10	65
SIN3B	5.49555	5.28767	0.207882	0.0013718	5.85865	4.66634e-09	0.930124	3.64396e-10	240
PRKACB	5.39549	4.50198	0.893504	1.48853e-07	6.27007	3.60897e-10	0.930065	3.77061e-10	36
CX3CR1	1.43741	0.00643444	1.43098	4.14669e-09	6.00947	1.86127e-09	1.02602	3.77128e-10	18
TSHZ1	5.08243	4.51463	0.567796	2.85309e-06	5.67551	1.38276e-08	0.898456	3.8307e-10	58
HOXA4	2.06252	0.956131	1.10639	6.71364e-07	5.78545	7.23203e-09	0.884636	3.85458e-10	113
NPR2	3.11879	2.35965	0.75914	5.32231e-10	6.17607	6.57172e-10	0.914135	3.92937e-10	23
SOX14	-2.75229	-1.95923	-0.793055	0.0684034	-5.66669	1.45586e-08	-0.776431	3.92965e-10	38
STAT5B	6.05936	5.57711	0.482254	6.83558e-09	6.15968	7.28928e-10	0.926047	3.99325e-10	48
ELK3	6.05388	5.53843	0.515442	3.01519e-08	6.09984	1.06176e-09	0.949091	4.05139e-10	95
PTH1R	-0.497316	-1.72269	1.22537	6.28611e-09	5.88361	4.01414e-09	0.777492	4.11331e-10	27
TIAM1	2.77569	1.98937	0.786318	3.28347e-05	6.0349	1.59059e-09	1.02527	4.24015e-10	22
CDON	3.24655	2.42419	0.822361	0.000141568	5.65924	1.52041e-08	0.903639	4.33195e-10	21
ZC3H12A	4.67767	5.63159	-0.953921	7.92579e-07	-5.80318	6.50699e-09	-0.932774	4.36402e-10	116
NRK	0.78853	-1.13779	1.92632	4.44949e-07	6.09907	1.06688e-09	0.969527	4.3724e-10	30
GLI2	3.66541	2.58416	1.08125	5.88722e-07	6.1191	9.41028e-10	0.911705	4.43025e-10	60
MORC2	5.0038	5.24142	-0.237616	0.000503467	-5.9785	2.25205e-09	-0.806436	4.49721e-10	147
ISL1	1.85369	0.713063	1.14062	1.30265e-05	5.81239	6.15855e-09	0.825784	4.55378e-10	34
ZBTB47	4.10626	3.28956	0.816703	1.9021e-08	5.89168	3.82287e-09	0.871037	4.55818e-10	67
ZC3H12C	3.21325	3.11793	0.0953173	0.618008	6.10549	1.02485e-09	0.970635	4.56077e-10	63
RFC4	3.53917	3.95002	-0.410854	5.22571e-05	-6.101	1.05405e-09	-0.768305	4.57669e-10	34
RXRG	-2.1372	-3.26904	1.13184	1.41835e-07	5.78499	7.25166e-09	0.772462	4.58846e-10	85
ZNF471	1.11237	-0.131014	1.24338	6.06119e-09	5.96629	2.42707e-09	0.806162	4.66031e-10	33
TEK	3.49872	2.63329	0.865425	1.13875e-08	5.95402	2.61641e-09	1.01682	4.72171e-10	24
RAB12	4.74279	4.11641	0.626381	1.53202e-09	5.97706	2.27199e-09	0.892679	4.81679e-10	64
ARHGEF33	-1.61698	-2.2712	0.654215	0.00014541	5.622	1.88763e-08	0.859289	4.8423e-10	40
IKZF1	4.64205	3.39607	1.24598	1.37587e-08	6.06346	1.33221e-09	1.03207	4.88427e-10	154
PDGFC	3.8958	3.10043	0.795367	1.79339e-07	6.1718	6.75168e-10	0.938182	4.91447e-10	32
HEY2	1.58405	1.04416	0.539894	0.000147711	5.74055	9.43714e-09	1.03693	4.94014e-10	32
NPY5R	-3.68214	-4.2999	0.617755	0.000195001	6.10514	1.0271e-09	0.773289	5.01358e-10	32
LMCD1	4.44749	3.79631	0.651171	3.20992e-07	5.92912	3.04568e-09	0.998099	5.03383e-10	91
CSF1	5.66275	5.23995	0.4228	0.00179444	6.05165	1.43371e-09	1.0149	5.14292e-10	24
GRTP1	3.38081	4.13675	-0.755938	2.62608e-07	-5.98771	2.12816e-09	-0.95159	5.18679e-10	46
SOCS2	3.49813	3.17757	0.320561	0.0361756	5.98624	2.14747e-09	0.686125	5.19247e-10	22
ZC3H8	2.92539	3.12581	-0.200417	0.018574	-6.02695	1.67084e-09	-0.884148	5.23613e-10	88
GTF2H4	3.47521	3.71758	-0.242373	0.000948113	-5.93611	2.91867e-09	-0.976809	5.27702e-10	70
ZFHX4	3.03881	1.548	1.49081	3.84016e-07	5.94768	2.7197e-09	0.987757	5.30469e-10	37
CHAF1A	4.0446	4.41019	-0.365595	0.00149037	-5.92094	3.20101e-09	-0.834904	5.38075e-10	98
HLF	2.00036	1.00499	0.995366	0.00014038	5.61527	1.96252e-08	0.846508	5.46264e-10	77
CBLC	4.36875	5.26438	-0.895635	3.20543e-07	-5.60313	2.10519e-08	-0.845868	5.46716e-10	64
L3MBTL3	3.02964	2.54612	0.483516	0.00023145	5.94533	2.75908e-09	0.960168	5.4853e-10	187
DMD	4.3936	3.29437	1.09924	9.70787e-06	5.77139	7.86206e-09	0.923074	5.51493e-10	185
E2F3	3.98446	4.34815	-0.36369	2.82718e-05	-5.94438	2.77513e-09	-0.597528	5.59991e-10	210
NLRP1	4.37556	3.41838	0.957178	6.86672e-08	6.00336	1.93278e-09	1.03685	5.63295e-10	15
IGF2	5.83801	5.33699	0.501027	0.141588	5.83857	5.26511e-09	0.953971	5.66795e-10	190
CYTL1	-0.101044	-1.19057	1.08953	3.17251e-08	6.11822	9.46275e-10	0.898772	5.67405e-10	13
ZNF77	1.08471	1.42294	-0.338236	0.000332986	-6.22817	4.71915e-10	-0.980208	5.75094e-10	69
RHOB	7.98319	7.30774	0.675447	1.61328e-05	5.47272	4.43188e-08	0.887216	5.82509e-10	23
CDC42BPG	4.0207	4.90274	-0.882042	1.46147e-08	-5.75118	8.8624e-09	-0.870726	5.87758e-10	106
MED24	6.04441	6.58758	-0.543174	6.11987e-05	-6.1141	9.71027e-10	-0.894837	5.87934e-10	29
FANCG	3.31648	3.79613	-0.479647	3.33993e-05	-5.82774	5.61815e-09	-0.825678	5.90222e-10	54
ELN	5.86262	4.67764	1.18499	5.09523e-06	5.92524	3.11834e-09	1.0208	5.92782e-10	52
CLDN3	4.46012	6.01622	-1.5561	0.000370277	-5.95422	2.61307e-09	-0.834593	5.93337e-10	110
HSFX1	-0.950582	-1.02542	0.0748422	0.656196	5.57351	2.49659e-08	0.847008	6.04339e-10	54
BCL7A	4.12113	4.21996	-0.0988283	0.326256	-6.13658	8.43151e-10	-0.931638	6.04655e-10	170
RASSF7	4.58296	5.35627	-0.773313	1.35149e-08	-5.94024	2.84607e-09	-0.876222	6.07631e-10	75
PTGES2	5.22702	5.70489	-0.477878	3.1492e-06	-6.07456	1.24332e-09	-0.989897	6.19139e-10	283
TBX3	3.61688	4.22597	-0.609092	0.00708984	-6.01064	1.84795e-09	-0.842902	6.19774e-10	45
RACGAP1	4.83478	5.59368	-0.758907	4.72725e-10	-5.71549	1.09388e-08	-0.64481	6.24836e-10	40
ADRB3	-2.27641	-3.44948	1.17307	5.13124e-06	5.67254	1.40692e-08	0.831996	6.25599e-10	36
PGAP2	3.74251	4.12337	-0.38086	1.51517e-05	-6.18453	6.22883e-10	-0.96482	6.31048e-10	42
BAIAP2L2	4.43654	5.46543	-1.02889	2.32262e-07	-5.70387	1.17117e-08	-0.727067	6.32517e-10	62
MCM8	4.0684	4.66661	-0.598206	1.47872e-07	-6.12502	9.0673e-10	-0.737813	6.37499e-10	107
ZNF761	3.76009	4.21948	-0.459392	0.000176609	-5.95352	2.62432e-09	-0.863911	6.38161e-10	60
OPCML	-1.71156	-2.33309	0.621535	0.00237191	5.83208	5.47421e-09	0.60607	6.43109e-10	36
ZNF287	1.02793	0.542301	0.48563	0.00590689	5.82856	5.59076e-09	0.857249	6.43262e-10	34
RAB33B	3.77822	3.50932	0.268902	0.000180115	5.94322	2.79485e-09	0.87605	6.43911e-10	65
ASB18	-4.60205	-4.22036	-0.381687	0.00998716	-6.64421	3.0484e-11	-0.924834	6.45865e-10	41
ATAD2	5.1811	5.81052	-0.629419	1.0246e-05	-5.83259	5.45746e-09	-0.630204	6.54215e-10	165
ZNF256	0.840231	0.343566	0.496665	0.0235462	5.97155	2.35007e-09	0.999608	6.56397e-10	33
GATA3	2.22421	1.30117	0.923042	1.23122e-06	6.09329	1.10614e-09	1.04087	6.58874e-10	46
RERG	2.91648	1.53673	1.37975	1.89648e-07	5.74433	9.22831e-09	0.92036	6.67664e-10	30
GSN	8.70714	7.84363	0.863512	1.09439e-09	5.99919	1.98307e-09	0.781009	6.73836e-10	51
MLXIPL	1.18102	3.27277	-2.09175	1.24033e-08	-6.1165	9.56536e-10	-0.946404	6.75423e-10	106
KLF9	5.78381	4.97049	0.813319	3.21519e-07	5.92544	3.11455e-09	0.835367	6.82656e-10	31
GOLPH3	6.81492	6.87291	-0.0579904	0.428825	-6.46922	9.85101e-11	-1.02572	6.84566e-10	80
AGTR2	-3.39437	-4.50759	1.11322	7.87009e-07	5.59397	2.21941e-08	0.822678	6.8461e-10	20
PDE8B	2.16268	1.56454	0.598139	4.47554e-05	5.86243	4.56148e-09	0.897375	6.86997e-10	20
GATAD1	5.00371	5.23212	-0.22841	0.0534548	-6.15991	7.27863e-10	-1.01752	6.90914e-10	68
ADAP1	5.4525	6.11456	-0.662063	1.71039e-06	-5.92613	3.10153e-09	-0.873408	6.94578e-10	59
LPXN	4.11434	3.2905	0.823846	1.37499e-07	6.2458	4.21632e-10	1.02479	7.07122e-10	10
TBC1D1	6.21462	5.61787	0.596756	2.86252e-09	5.79849	6.69155e-09	0.861809	7.10332e-10	23
ZNF662	1.02123	-0.0222393	1.04347	2.18506e-05	5.73338	9.84484e-09	0.807112	7.17402e-10	43
FGFRL1	4.74398	5.44011	-0.696129	5.72255e-05	-5.83347	5.42848e-09	-0.977171	7.19117e-10	46
AKAP4	-4.384	-3.68611	-0.697886	0.00176996	-6.39762	1.57821e-10	-1.00753	7.22593e-10	46
TBC1D25	4.03445	3.86799	0.166454	0.0179061	5.99678	2.01263e-09	0.872026	7.28424e-10	68
ZNF831	1.47223	0.154935	1.31729	1.7533e-07	5.96801	2.40168e-09	1.02164	7.28838e-10	119
PTPRD	1.44776	0.329384	1.11838	5.84332e-06	5.91291	3.36121e-09	0.899806	7.63502e-10	11
PSPC1	4.59132	4.96082	-0.369501	6.344e-07	-5.9658	2.43444e-09	-0.886215	7.69952e-10	48
TGFBR2	7.36926	6.91757	0.451693	0.00017434	5.54696	2.90683e-08	0.91821	7.76425e-10	28
PDCD1LG2	1.56068	0.684226	0.876457	3.36899e-06	6.07654	1.22802e-09	0.83681	7.87005e-10	33
CAPN15	6.1015	6.50642	-0.404917	0.000372098	-5.96753	2.40869e-09	-0.865589	7.91732e-10	144
RBL1	3.81262	4.24495	-0.432327	4.14418e-05	-5.80485	6.4424e-09	-0.642342	7.93243e-10	261
GNAL	3.19603	2.44691	0.74912	9.29354e-05	5.80713	6.35542e-09	0.908615	7.99817e-10	18
HELLS	4.1867	4.69579	-0.50909	0.000192585	-5.76635	8.10052e-09	-0.618078	8.00627e-10	176
ARHGDIB	6.66137	5.73856	0.922804	3.99987e-10	6.27787	3.43241e-10	0.96287	8.10926e-10	16
IRX6	-4.02721	-4.11093	0.0837198	0.683414	5.85098	4.88688e-09	0.689628	8.1313e-10	98
MCM2	5.14884	5.83622	-0.687381	2.04518e-07	-5.68485	1.30925e-08	-0.698715	8.1576e-10	84
MPP7	4.32772	4.08892	0.238806	0.281814	5.76226	8.29942e-09	0.914259	8.19612e-10	19
POU3F1	-1.29816	-2.18799	0.889838	9.53015e-05	5.57436	2.48448e-08	1.05318	8.38493e-10	63
SNAPC4	3.82621	4.17012	-0.343908	0.000307115	-5.9457	2.75274e-09	-0.888935	8.52306e-10	76
EVI2A	3.22505	2.06002	1.16503	6.07091e-11	6.38788	1.68198e-10	1.03161	8.54267e-10	15
ZNF71	2.38166	1.5921	0.789558	1.59787e-05	5.76839	8.00308e-09	0.881814	8.59153e-10	19
ARHGEF17	5.74068	5.15223	0.588442	5.41348e-05	5.67996	1.34725e-08	0.937148	8.62659e-10	37
ZFP90	4.1721	3.83568	0.33642	4.97465e-05	5.95109	2.66366e-09	0.950753	8.63656e-10	58
TGFA	3.5672	4.11963	-0.552424	0.00298639	-5.62953	1.80698e-08	-0.79512	8.63891e-10	92
OR2W3	-4.0785	-4.31557	0.237079	0.0898138	6.2148	5.13911e-10	0.797413	8.63906e-10	18
MCM7	6.24385	6.81826	-0.574408	1.38176e-05	-5.9164	3.29067e-09	-0.779279	8.77643e-10	41
GTSE1	3.2555	4.05246	-0.796956	5.08222e-07	-5.4147	6.13926e-08	-0.628454	8.79627e-10	66
HTR3A	-0.704768	-2.13922	1.43445	4.63887e-06	5.71397	1.10372e-08	0.957871	8.83225e-10	22
PTN	2.50611	1.53152	0.974586	3.01959e-06	5.69779	1.21371e-08	0.881987	9.24358e-10	29
FRAT2	4.04273	4.43328	-0.390556	0.000386577	-5.83118	5.50376e-09	-0.882373	9.2501e-10	62
ILF2	6.66245	7.12193	-0.459472	2.39524e-07	-5.98011	2.22991e-09	-0.759431	9.38625e-10	181
FOXP2	2.72357	0.943569	1.78	2.23698e-07	5.52909	3.21902e-08	0.905782	9.66322e-10	90
TBX18	0.0612695	-1.17187	1.23314	5.98033e-05	6.05883	1.37114e-09	0.882498	9.76346e-10	31
GID4	3.61661	3.26262	0.353993	0.00011802	5.83788	5.28686e-09	0.771798	9.77224e-10	50
SMAD4	5.75075	5.45716	0.293592	0.00812641	5.97523	2.29771e-09	0.887242	9.7865e-10	23
GAP43	-0.776955	-2.05694	1.27999	6.45285e-06	5.48552	4.12246e-08	0.908354	9.83507e-10	11
ZCWPW1	0.899185	0.820265	0.0789195	0.530078	5.9873	2.13347e-09	0.747538	9.89215e-10	55
SMARCD1	5.6814	5.95724	-0.27584	8.12914e-05	-5.9119	3.38183e-09	-0.777437	9.90388e-10	124
KLHL6	3.67697	2.52948	1.1475	1.20825e-07	5.95638	2.57881e-09	0.980765	1.00641e-09	12
RPS6KA2	5.18308	4.75504	0.428039	0.000290763	6.00377	1.92787e-09	0.801478	1.00736e-09	40
HNF4G	4.30723	5.10173	-0.794496	0.00053133	-5.83621	5.34022e-09	-0.756126	1.00813e-09	321
CSF2RB	4.72804	3.64735	1.08069	2.35873e-07	5.93267	2.98041e-09	0.975529	1.02252e-09	15
MTNR1A	-3.41617	-2.37529	-1.04088	0.000283611	-5.82785	5.61473e-09	-0.938469	1.03913e-09	36
HSP90AA1	9.48829	9.93708	-0.448787	5.57598e-06	-6.03952	1.54573e-09	-0.836145	1.03935e-09	39
ASF1B	4.00956	4.7431	-0.733544	8.0519e-07	-5.80961	6.26177e-09	-0.792544	1.04653e-09	270
HSF5	-2.58757	-3.29504	0.70747	0.000359222	5.75354	8.73936e-09	1.0584	1.0555e-09	87
EZH1	4.73547	4.30764	0.427836	6.27744e-07	5.81175	6.18213e-09	0.841023	1.05569e-09	168
NPY1R	-0.383777	-1.59991	1.21613	0.000156288	5.75593	8.61678e-09	0.847934	1.06113e-09	20
CAMK1	3.34572	2.83182	0.513896	3.79729e-05	5.78837	7.10741e-09	0.847277	1.0629e-09	58
PLEKHG6	3.89634	4.99637	-1.10004	1.75411e-07	-5.86302	4.54518e-09	-0.914716	1.07619e-09	78
ZNF304	3.04035	2.76011	0.280237	0.0780772	5.86751	4.4238e-09	0.94252	1.07768e-09	37
GPR21	-3.40181	-3.55629	0.15448	0.381214	5.67255	1.40687e-08	0.981401	1.08693e-09	18
ZNF16	2.93141	3.17135	-0.239941	0.00153377	-6.11044	9.93571e-10	-0.979151	1.09775e-09	53
TBPL1	3.58461	3.66922	-0.0846116	0.260528	-6.35546	2.07808e-10	-0.881058	1.10523e-09	101
PARP15	2.42931	1.17594	1.25337	1.83347e-07	5.74999	8.92503e-09	1.08559	1.10559e-09	219
CYTH4	3.76356	2.76215	1.00141	1.69362e-08	6.03601	1.57974e-09	0.997956	1.10689e-09	20
FOXF1	4.75587	3.7023	1.05357	8.06391e-08	5.65221	1.584e-08	0.901347	1.11466e-09	60
POMC	-0.681993	-1.50911	0.827117	0.000234555	5.83335	5.43248e-09	0.955581	1.12007e-09	27
CYCS	7.03466	7.44516	-0.410503	0.000245394	-6.15845	7.34587e-10	-0.952495	1.12386e-09	50
ZNF853	2.65084	1.69687	0.953965	2.45895e-05	5.73998	9.46853e-09	0.883805	1.1295e-09	109
SLC22A17	3.02787	1.92199	1.10588	1.14388e-07	5.75509	8.65948e-09	0.810018	1.13272e-09	66
NELFA	4.58069	4.87409	-0.293401	0.000368256	-5.9172	3.27463e-09	-0.972817	1.13465e-09	193
ZNF467	2.92563	2.41677	0.508863	0.000847644	5.94662	2.73741e-09	0.863239	1.16183e-09	73
NXN	4.7872	4.09911	0.688087	0.00048936	5.62323	1.87418e-08	0.885775	1.19293e-09	25
RUSC1	5.29139	5.51142	-0.22003	0.00480247	-6.13778	8.36822e-10	-0.926922	1.21188e-09	69
MNDA	3.03392	2.15817	0.875745	8.24302e-06	6.00427	1.92193e-09	0.909901	1.23417e-09	317
EVX1	-2.53367	-1.26194	-1.27173	0.000989067	-5.89628	3.71781e-09	-0.646439	1.23587e-09	53
OPTN	6.17925	5.95503	0.224218	0.0211625	6.56102	5.34414e-11	0.899585	1.23608e-09	44
MARK2	5.93104	6.22219	-0.291144	0.000147	-5.66046	1.50968e-08	-0.892121	1.25296e-09	64
MEIS3	2.62234	1.73418	0.888163	3.56173e-07	5.8243	5.73515e-09	0.951786	1.25658e-09	87
STAMBP	5.14896	5.34289	-0.193923	0.000311747	-5.97806	2.25807e-09	-0.939116	1.25897e-09	36
NR2F1	4.62177	3.61918	1.00259	6.19694e-06	5.72005	1.0649e-08	0.935295	1.26349e-09	68
BLM	2.98112	3.60251	-0.621393	1.64576e-05	-5.76174	8.32488e-09	-0.656689	1.26721e-09	36
TFAM	4.96145	5.19546	-0.234012	0.00413823	-5.88045	4.09161e-09	-0.690285	1.27763e-09	80
SOX5	1.38041	0.562833	0.817574	1.36478e-05	5.73682	9.64706e-09	0.916191	1.28117e-09	42
ZNF346	3.16809	2.86924	0.298849	4.39742e-06	5.71087	1.12397e-08	0.708427	1.28264e-09	54
ZNF175	2.81441	2.19534	0.619074	2.82397e-05	6.00266	1.94109e-09	0.932209	1.28652e-09	20
ZNF382	1.18525	0.0183031	1.16695	1.91132e-09	5.78591	7.21204e-09	0.946121	1.39773e-09	71
PNOC	-0.168465	-1.61965	1.45119	3.90424e-07	5.76361	8.23316e-09	0.879681	1.39994e-09	24
TIGD2	2.74428	3.0768	-0.332519	0.000377528	-5.8239	5.74912e-09	-0.860363	1.4063e-09	104
ZNF34	2.01491	1.73691	0.278001	0.00156579	5.54245	2.98276e-08	0.7998	1.42225e-09	28
LRPPRC	7.00648	7.47313	-0.466646	4.53709e-07	-5.83999	5.2203e-09	-0.818552	1.43547e-09	201
PLCH1	2.83785	3.51952	-0.681675	0.000218429	-5.76465	8.18287e-09	-0.827721	1.46125e-09	62
AIFM1	5.02332	5.38581	-0.362493	0.000322797	-6.06995	1.27949e-09	-0.884256	1.48649e-09	51
FGF14	0.868935	-0.670616	1.53955	2.98245e-07	5.78782	7.13048e-09	0.863253	1.48681e-09	10
RALGAPA2	6.3046	6.87491	-0.57031	1.02774e-06	-5.71136	1.12076e-08	-0.898855	1.52193e-09	96
GREM2	2.34679	0.393502	1.95328	5.97925e-07	5.7605	8.3866e-09	0.793367	1.55382e-09	17
ZNF3	4.5718	4.89626	-0.32446	0.000243025	-6.30025	2.97174e-10	-0.987577	1.5693e-09	105
PPARG	4.05633	4.61938	-0.563054	0.00313484	-5.51731	3.44229e-08	-0.864989	1.57443e-09	129
PTPN14	5.51554	5.15313	0.362413	0.000664518	5.66453	1.47426e-08	0.840591	1.60781e-09	228
AEBP1	8.18371	6.94921	1.2345	9.52639e-10	5.82793	5.61188e-09	0.946061	1.6306e-09	135
ORC2	4.38881	4.64202	-0.253212	0.000353876	-5.92733	3.07909e-09	-0.790861	1.64698e-09	115
SENP2	4.80352	4.91586	-0.112341	0.127758	-5.89592	3.72606e-09	-1.03382	1.65657e-09	52
DLG4	3.08958	2.29602	0.793558	2.27807e-08	5.7646	8.1853e-09	0.831581	1.65686e-09	62
TAF5L	4.6021	4.72791	-0.125804	0.0335557	-5.83085	5.5145e-09	-0.67233	1.68837e-09	84
TUSC3	3.22525	2.38421	0.841045	2.25126e-05	5.89052	3.84978e-09	0.954671	1.68921e-09	20
ZNF275	4.84195	4.76508	0.0768656	0.377347	6.03469	1.59264e-09	0.750748	1.69328e-09	56
WNT1	-3.27555	-3.68642	0.410871	0.0144989	5.71586	1.09149e-08	0.960221	1.71177e-09	127
ZNF157	-3.37761	-3.90147	0.523856	0.00277639	5.67214	1.41021e-08	0.833094	1.71223e-09	36
LILRB5	1.77231	0.947224	0.825083	0.000204588	5.8981	3.67712e-09	0.971775	1.733e-09	27
TWIST1	1.02481	0.31105	0.713761	0.00743218	5.75205	8.81659e-09	0.961196	1.76247e-09	81
SORCS1	-0.236337	-2.25051	2.01418	1.40665e-09	5.6618	1.49796e-08	0.800376	1.76702e-09	44
CCR7	2.65307	1.20262	1.45045	1.67452e-07	5.7551	8.65923e-09	0.998032	1.79009e-09	20
FZD5	5.8474	6.30258	-0.455182	0.000443292	-5.66476	1.47228e-08	-0.89482	1.79787e-09	63
CRY2	4.66342	4.37009	0.293327	0.000746332	5.86798	4.41135e-09	0.736287	1.79867e-09	145
HEYL	4.81526	3.963	0.852255	3.91485e-06	5.69315	1.24718e-08	0.853775	1.84074e-09	92
XPR1	5.49079	5.72962	-0.238836	0.0062051	-6.00758	1.88316e-09	-0.655998	1.84397e-09	88
ZFYVE21	4.54053	4.39176	0.148768	0.0421524	5.85685	4.71719e-09	0.749135	1.84831e-09	83
WNK3	-0.370836	-1.16612	0.795284	3.06421e-05	5.79581	6.79929e-09	0.905083	1.85929e-09	56
MLLT3	3.86975	3.80738	0.0623646	0.66064	5.58739	2.30508e-08	0.894435	1.86581e-09	133
BARX1	4.08501	2.67381	1.4112	1.38606e-05	5.48186	4.20883e-08	0.881417	1.87005e-09	93
APH1B	3.12413	2.67621	0.447921	0.000399808	5.78702	7.16464e-09	0.949166	1.87323e-09	66
RGS10	4.20489	3.62431	0.58058	1.68136e-06	6.52519	6.79139e-11	0.92311	1.8814e-09	70
TNFSF14	1.93765	1.04583	0.891821	3.24456e-06	6.11491	9.66132e-10	0.9825	1.89555e-09	19
HES1	5.56229	6.1125	-0.550212	1.54092e-06	-5.91924	3.23438e-09	-0.930432	1.90187e-09	112
CORO2A	5.21256	5.8373	-0.624743	0.000349665	-5.49204	3.97317e-08	-0.818613	1.91674e-09	86
PPP1CB	7.56426	7.43453	0.129734	0.0428695	5.7895	7.05957e-09	0.755766	1.91865e-09	70
HAND2	2.5182	0.00726387	2.51094	3.80181e-08	5.42702	5.73033e-08	0.898573	1.92032e-09	76
BTLA	0.213091	-1.09134	1.30443	4.39517e-07	5.84955	4.92915e-09	0.944185	1.92248e-09	9
FOXA1	4.40324	5.34857	-0.945331	0.000383446	-5.45098	5.00921e-08	-0.849749	1.92506e-09	99
LPAR6	3.74395	3.42612	0.317822	0.0176717	5.83038	5.53001e-09	0.978448	1.93122e-09	58
GRIA2	-3.0939	-3.83961	0.745709	0.00286546	5.73929	9.50725e-09	0.727206	1.94539e-09	14
MEN1	4.91003	5.29112	-0.381087	1.84234e-05	-5.75342	8.74578e-09	-0.90131	1.97942e-09	97
TMED4	6.00375	6.21134	-0.207589	0.00101911	-5.94237	2.80931e-09	-0.814305	1.99245e-09	87
HOXB4	2.71325	1.74641	0.966836	6.93512e-07	5.76547	8.14302e-09	0.907711	2.00787e-09	17
TGFB1	6.5242	5.88345	0.640749	4.88696e-06	5.81049	6.22885e-09	0.950619	2.03343e-09	60
KLF2	6.01298	5.24924	0.763738	2.82836e-05	5.8402	5.21384e-09	0.77467	2.05276e-09	93
NACC2	5.51966	5.00723	0.512432	0.00011248	5.40263	6.56711e-08	0.852308	2.09153e-09	90
ARL3	3.92011	3.65667	0.263445	0.00156569	5.8546	4.78159e-09	0.815925	2.10618e-09	43
NLGN1	0.167338	-1.514	1.68134	2.66866e-07	5.58346	2.35784e-08	0.859349	2.10653e-09	39
ATIC	5.85789	6.25797	-0.400072	6.85288e-06	-5.95534	2.59532e-09	-0.775968	2.12058e-09	58
HDAC2	6.06063	6.39026	-0.32963	0.000133469	-5.89742	3.69219e-09	-0.894397	2.13135e-09	33
GFRA1	3.01866	1.60979	1.40887	0.000190934	5.71491	1.09761e-08	0.793744	2.13209e-09	50
TNXB	5.9234	4.26684	1.65656	4.7476e-09	5.67657	1.37423e-08	0.812847	2.20376e-09	37
FZD1	5.07451	4.45615	0.618357	1.81589e-06	5.90713	3.48119e-09	0.949192	2.22835e-09	35
KIT	3.32014	2.61636	0.703781	0.0026317	5.7479	9.03578e-09	0.684475	2.24251e-09	26
WDR90	4.43326	5.01408	-0.580821	1.47126e-05	-5.98654	2.14356e-09	-0.843435	2.25902e-09	59
ATOH8	1.65444	0.801637	0.8528	0.000224542	5.5847	2.34109e-08	0.69656	2.28495e-09	98
PAX5	2.73497	1.12076	1.61421	7.32727e-05	5.59308	2.23075e-08	1.00621	2.29796e-09	83
GPR82	0.60637	-0.15317	0.75954	1.9122e-05	6.11368	9.73592e-10	0.957895	2.29805e-09	19
KDM1A	5.72534	6.0424	-0.317063	0.000147748	-5.87625	4.19674e-09	-0.728431	2.29895e-09	131
EPHB2	5.20849	6.03195	-0.823462	0.00149524	-5.9511	2.66349e-09	-0.609518	2.30458e-09	97
ARHGAP30	4.67421	3.7046	0.96961	7.57893e-09	5.81447	6.08257e-09	0.976684	2.34741e-09	15
SAV1	4.7689	4.70818	0.0607225	0.495783	6.15477	7.51848e-10	0.77938	2.34968e-09	52
FLT3	-0.14378	-1.55779	1.41401	9.67341e-10	5.74633	9.12037e-09	1.01064	2.4142e-09	11
NFATC4	3.7424	2.8676	0.874805	2.63076e-07	5.47787	4.30469e-08	0.863586	2.46333e-09	68
ZNF133	2.97484	3.25213	-0.277289	0.00167012	-6.08138	1.19153e-09	-0.875956	2.46879e-09	163
GMNN	3.34129	3.91752	-0.576229	7.74458e-06	-5.82831	5.5992e-09	-0.868973	2.47276e-09	146
CCNK	5.71576	5.9832	-0.26744	0.000322316	-5.73355	9.83507e-09	-0.929073	2.49903e-09	62
CBX3	6.56743	6.98782	-0.420394	1.20499e-06	-5.97181	2.34639e-09	-0.720859	2.52084e-09	168
ZSCAN18	3.89462	2.81183	1.08278	4.64937e-06	5.62552	1.84953e-08	0.786248	2.56797e-09	110
BLK	1.14595	-0.758173	1.90413	2.52125e-07	5.73155	9.95176e-09	0.957341	2.57846e-09	11
RAD51	2.59975	3.2064	-0.606647	4.46884e-06	-5.56223	2.66343e-08	-0.659181	2.57973e-09	63
PARP1	6.98877	7.17221	-0.183443	0.0214658	-5.65737	1.53711e-08	-0.657268	2.58657e-09	51
TLX1	-0.330511	0.418086	-0.748597	0.0433291	-5.98797	2.12478e-09	-0.698659	2.63307e-09	78
TSPYL2	3.92978	3.21778	0.711999	2.29753e-08	5.54711	2.90423e-08	0.694256	2.65973e-09	47
IL1RAPL1	-2.55977	-3.04303	0.483262	0.0215343	5.3197	1.03941e-07	0.903221	2.66082e-09	12
FADS1	3.90179	3.9351	-0.0333173	0.855887	5.70597	1.15684e-08	0.963935	2.67716e-09	294
CDK11B	5.66612	5.78585	-0.119729	0.0944214	-5.75004	8.92215e-09	-0.82339	2.6783e-09	203
SORCS3	-2.83481	-3.96363	1.12882	1.55604e-06	5.44341	5.22706e-08	0.798523	2.68061e-09	20
ZHX2	4.61302	4.47277	0.140247	0.200629	5.71972	1.06697e-08	0.864797	2.70966e-09	43
ZNF486	2.31103	1.80965	0.501377	0.0647043	5.68738	1.29e-08	0.829095	2.72507e-09	39
OPRL1	0.363034	-0.415379	0.778413	4.16674e-05	5.75554	8.63663e-09	0.967817	2.76576e-09	19
FANCA	4.03435	4.7567	-0.722356	9.72981e-07	-5.69374	1.24284e-08	-0.810209	2.77443e-09	37
NOLC1	6.44641	6.86807	-0.421661	2.6402e-05	-5.80407	6.47235e-09	-0.714476	2.77772e-09	121
CCND2	6.70085	5.79523	0.905625	9.67022e-05	5.52108	3.36918e-08	0.891134	2.80991e-09	45
AURKB	3.2413	4.1094	-0.868093	2.97269e-07	-5.48083	4.23339e-08	-0.674494	2.81479e-09	47
MPP2	1.56297	0.841348	0.721623	0.00248416	5.54001	3.02451e-08	0.824457	2.82755e-09	18
ARHGEF38	2.57818	3.03813	-0.459952	0.0362981	-5.52998	3.20273e-08	-0.853647	2.83229e-09	50
WDR12	4.29426	4.68054	-0.386281	1.97151e-05	-5.78122	7.41588e-09	-0.754643	2.84096e-09	90
NONO	7.87625	8.10698	-0.230726	0.000733798	-5.7509	8.87701e-09	-0.867609	2.86181e-09	86
FEZF1	-1.04902	-0.175054	-0.873962	0.0269752	-5.81169	6.18447e-09	-0.449616	2.86548e-09	98
TLR10	1.53066	-0.398338	1.929	1.7622e-09	5.64615	1.64079e-08	1.04007	2.87831e-09	15
HOXA11	0.153682	1.04088	-0.887202	0.0288688	-5.88641	3.94663e-09	-0.688552	2.90751e-09	89
TIGD1	1.60023	2.05554	-0.45531	0.000159204	-5.76017	8.40272e-09	-0.91783	2.93187e-09	132
ZBTB33	4.92056	5.15194	-0.231375	0.00543154	-5.76639	8.09874e-09	-0.60424	2.94003e-09	99
NIN	5.14672	4.5052	0.641516	2.59643e-06	5.69231	1.25331e-08	0.914936	2.97076e-09	56
GDF7	0.277854	-0.646522	0.924376	0.000126459	5.6462	1.64037e-08	0.817494	3.03331e-09	143
ZBTB7B	6.02164	6.38713	-0.365488	0.00059509	-5.65641	1.54572e-08	-0.852192	3.04285e-09	115
JMY	4.69173	4.31247	0.37926	0.00117216	5.61167	2.00385e-08	0.874039	3.05803e-09	217
TRERF1	4.27797	4.13432	0.143653	0.324926	5.94461	2.77121e-09	1.00977	3.07231e-09	71
TRIM22	5.7569	4.73898	1.01793	2.47861e-08	5.94545	2.75704e-09	0.959559	3.09761e-09	106
PAWR	5.54257	5.72447	-0.181893	0.0252015	-5.77042	7.90765e-09	-0.661214	3.15628e-09	48
FER	4.12473	3.52726	0.597468	1.32915e-06	6.00119	1.95879e-09	0.805912	3.17595e-09	56
PRRX1	4.90777	3.49348	1.41429	1.77184e-08	5.77002	7.92598e-09	0.747631	3.176e-09	127
PCSK7	6.58162	6.40494	0.176679	0.0705545	5.72045	1.06243e-08	0.776233	3.18708e-09	31
WDR77	4.84174	5.21788	-0.376134	9.6413e-05	-5.73349	9.83862e-09	-0.906613	3.20192e-09	109
GPR19	-0.67236	-0.466761	-0.205599	0.226086	-6.33748	2.33547e-10	-0.598864	3.26656e-09	47
HSPD1	7.733	8.49523	-0.762232	2.0774e-11	-5.66139	1.50155e-08	-0.765889	3.29321e-09	42
CERS6	6.36741	6.78376	-0.416354	0.000594285	-5.69885	1.20616e-08	-0.897787	3.31387e-09	113
CSRNP1	5.13042	4.84352	0.286903	0.0200225	5.80712	6.3556e-09	0.664907	3.32518e-09	57
GPR17	-1.08664	-1.97662	0.889975	7.42223e-05	5.52213	3.34915e-08	0.800258	3.36983e-09	20
BRCA2	3.50009	4.18748	-0.687394	2.13412e-07	-5.76976	7.93834e-09	-0.62012	3.41213e-09	54
GRIK5	1.33682	-0.139661	1.47648	9.67426e-07	5.4046	6.4952e-08	0.863249	3.50068e-09	26
EPHA3	3.72254	2.35176	1.37078	3.52309e-08	5.65536	1.55517e-08	0.976558	3.56553e-09	32
ZNF518B	3.41479	2.74639	0.668401	0.00265457	5.88775	3.91485e-09	0.88894	3.58513e-09	27
SH3GL2	-2.60268	-3.16914	0.566463	0.0307233	5.94011	2.84833e-09	0.472851	3.61001e-09	53
SUZ12	5.31682	5.64682	-0.329995	0.000132416	-5.65522	1.55644e-08	-0.693055	3.62071e-09	115
CBX4	4.8583	5.26121	-0.402915	0.000284417	-5.88848	3.89766e-09	-0.877793	3.62242e-09	95
GRASP	2.85787	2.0256	0.832266	8.14311e-09	5.68836	1.28262e-08	0.844741	3.63569e-09	59
SPOCK3	-3.02159	-3.96572	0.944122	3.37725e-05	5.53787	3.06167e-08	0.831817	3.6718e-09	11
CALM1	8.55642	8.40471	0.151703	0.0454368	5.55219	2.8211e-08	0.736706	3.67677e-09	74
DOK2	2.85762	1.97241	0.885204	4.75941e-07	5.93749	2.89421e-09	0.917533	3.7111e-09	16
DLX4	-1.67194	-0.572736	-1.09921	8.59041e-05	-5.91584	3.30186e-09	-0.738124	3.71875e-09	80
IL1RL2	-0.450704	0.248471	-0.699174	0.00750962	-5.80263	6.52838e-09	-0.912392	3.72652e-09	58
MSTN	-2.54181	-3.06678	0.524966	0.00584211	5.35216	8.69128e-08	0.726067	3.7283e-09	70
CREBRF	4.9105	4.4114	0.499105	7.18102e-07	5.66339	1.48414e-08	0.918905	3.73462e-09	140
TCEAL8	4.47668	4.04994	0.426746	0.0032441	5.76684	8.07699e-09	0.82896	3.74603e-09	108
MYC	6.23418	6.65439	-0.420203	0.00825951	-5.74247	9.33037e-09	-0.98346	3.76304e-09	122
BDKRB1	0.896613	0.158499	0.738114	0.000109479	5.69496	1.234e-08	0.826897	3.80216e-09	26
MATK	0.885262	0.00293834	0.882324	3.84772e-06	5.85723	4.70651e-09	0.959081	3.8131e-09	8
RAB15	4.36132	4.93461	-0.573288	0.00054562	-5.56639	2.60068e-08	-0.80488	3.81713e-09	52
PHF1	4.92538	4.48599	0.439388	3.70141e-07	5.64667	1.63589e-08	0.682592	3.84539e-09	142
ZDHHC6	4.74903	4.99838	-0.249353	0.000280691	-5.46962	4.51004e-08	-0.777256	3.84674e-09	32
BCL2L1	6.66943	7.20294	-0.533504	2.26426e-06	-5.63824	1.71796e-08	-0.830121	3.85494e-09	48
CCR4	1.58698	0.477517	1.10947	2.94881e-06	5.74599	9.13847e-09	0.807048	3.87094e-09	16
ANXA4	7.38309	7.94925	-0.566154	3.63878e-05	-5.38871	7.09667e-08	-0.774574	3.87149e-09	46
RBBP8	4.62357	4.89288	-0.269307	0.0119284	-5.58134	2.38677e-08	-0.694472	3.90073e-09	88
FMN2	-0.805374	-1.72411	0.918733	0.00620108	5.35149	8.72346e-08	0.839814	3.94369e-09	19
PURA	5.56679	5.20192	0.364867	9.44797e-08	5.59139	2.25254e-08	0.818745	3.9625e-09	82
LATS2	5.07658	4.83618	0.240397	0.0113546	5.8659	4.46711e-09	0.858777	3.96907e-09	37
YWHAZ	9.51719	9.83613	-0.318941	0.000247741	-5.75134	8.8537e-09	-0.64596	4.00703e-09	27
TSHZ2	4.39905	3.63574	0.763308	0.000192208	5.64919	1.61202e-08	0.970025	4.00861e-09	21
HTATSF1	5.5323	5.70561	-0.173314	0.0183215	-5.68116	1.33781e-08	-0.74714	4.02616e-09	76
PTPRN	0.0209442	-1.21914	1.24009	0.000259769	5.60158	2.12406e-08	0.881738	4.08677e-09	48
RAB2B	4.30336	3.9552	0.34816	7.0197e-07	5.52327	3.32742e-08	0.872159	4.09584e-09	59
ZNF200	2.94067	3.06927	-0.128598	0.0556049	-5.82	5.88469e-09	-0.745085	4.14607e-09	80
CD33	1.24422	0.220988	1.02323	6.30833e-08	6.05675	1.38901e-09	0.839805	4.16563e-09	6
ARID3C	-4.11107	-3.69052	-0.420549	0.00388223	-5.66091	1.50572e-08	-0.906804	4.22806e-09	73
CYSLTR2	0.258175	-0.648629	0.906805	3.55611e-06	5.62995	1.80262e-08	0.900522	4.25042e-09	11
MEF2D	6.44329	6.10038	0.342909	2.02499e-05	5.75459	8.68531e-09	0.726044	4.30619e-09	84
ZNF208	-0.586781	-1.63688	1.05009	1.84838e-05	5.60921	2.03254e-08	0.912925	4.35221e-09	32
APBB1IP	4.27636	3.46484	0.811526	0.000108651	5.91872	3.24464e-09	0.95588	4.36811e-09	9
NKRF	3.41257	3.83919	-0.426614	1.63676e-06	-5.8845	3.99268e-09	-0.743023	4.38183e-09	143
POLD1	4.37741	4.82652	-0.449111	0.0004607	-5.53	3.20228e-08	-0.752206	4.39167e-09	80
SH2D1A	1.40074	0.298123	1.10262	1.38791e-06	5.86957	4.36933e-09	0.938486	4.47822e-09	15
CD34	5.90012	5.23647	0.66365	1.51552e-06	5.53548	3.1038e-08	0.963554	4.54601e-09	21
KL	1.17344	0.207374	0.966067	3.24061e-06	5.56593	2.60756e-08	0.846937	4.6156e-09	40
ARHGAP1	7.3413	7.11555	0.225748	0.00154482	5.85698	4.71372e-09	0.919361	4.67167e-09	46
PASK	3.32252	3.71674	-0.394221	0.000313738	-5.72661	1.02458e-08	-0.829008	4.89644e-09	59
PPP2R5D	5.2164	5.54196	-0.325565	0.000486583	-5.96656	2.42307e-09	-0.994992	4.93753e-09	37
PRKAR1A	7.30386	7.10387	0.199983	0.00777616	5.88346	4.01788e-09	0.872476	4.93998e-09	40
MN1	4.17175	2.975	1.19675	6.11337e-06	5.5235	3.32303e-08	0.899581	4.97418e-09	43
E2F7	2.32225	3.1389	-0.816646	1.55758e-06	-5.51069	3.57426e-08	-0.550369	4.97788e-09	168
ZNF671	1.83409	1.09766	0.736424	1.05033e-06	5.37734	7.55938e-08	0.874921	5.02336e-09	40
GATA1	-3.0897	-3.64959	0.559894	0.000479975	5.5792	2.41632e-08	0.728353	5.02418e-09	50
CXCR4	6.02699	5.12569	0.901299	6.02481e-07	5.62463	1.85902e-08	1.00182	5.18917e-09	17
ZNF676	-1.982	-2.87732	0.895316	0.000595985	5.42263	5.87281e-08	0.836226	5.32869e-09	37
NRG2	-0.441927	-1.47421	1.03228	7.10766e-05	5.60736	2.05434e-08	0.765233	5.35613e-09	75
IQSEC3	0.693394	-0.189996	0.88339	0.000161095	5.61666	1.94679e-08	0.940408	5.47554e-09	18
PTEN	6.64594	6.30637	0.339563	0.000630376	5.64851	1.61842e-08	0.860055	5.53938e-09	53
ADORA3	1.70823	0.289033	1.4192	1.14737e-08	5.8591	4.65389e-09	0.920989	5.5889e-09	12
ARHGAP32	5.86542	6.32228	-0.456854	0.000271684	-5.56017	2.69517e-08	-0.792014	5.59225e-09	67
HMGA2	1.67455	2.61691	-0.94236	0.00723195	-5.79167	6.96908e-09	-0.568383	5.6567e-09	141
LRRN2	2.05825	0.809963	1.24829	6.2549e-07	5.62471	1.85817e-08	0.914702	5.68211e-09	11
MCF2	-3.04082	-3.67906	0.638236	2.04305e-05	5.65522	1.55647e-08	0.85395	5.77325e-09	48
RHOBTB2	4.79714	4.56113	0.236005	0.0360235	5.56126	2.67833e-08	0.717896	5.81663e-09	88
ZFP1	3.01465	2.89793	0.116725	0.138793	5.52368	3.31963e-08	0.781547	5.84712e-09	58
ZDHHC2	4.2971	3.9864	0.310698	0.144929	5.79892	6.67432e-09	0.915364	5.88805e-09	67
FOXO1	5.26309	4.88763	0.375457	0.00347891	5.72774	1.0178e-08	0.874212	6.15587e-09	77
ELMSAN1	5.95162	5.66199	0.289639	0.000255084	5.70118	1.18982e-08	0.862035	6.16368e-09	64
TCF19	4.14375	4.47879	-0.335031	0.00327802	-5.3277	9.94618e-08	-0.623926	6.18931e-09	62
PRKCI	5.91762	6.46749	-0.549867	3.99412e-05	-5.57914	2.41712e-08	-0.750416	6.28211e-09	123
TSPAN6	4.32504	4.75199	-0.426954	0.0144461	-6.05039	1.44494e-09	-0.989294	6.36464e-09	38
BUB1B	3.70058	4.55744	-0.856865	9.62235e-09	-5.47625	4.34433e-08	-0.597192	6.40036e-09	92
AJUBA	3.75218	4.43064	-0.678466	1.55064e-05	-5.61743	1.93818e-08	-0.585976	6.40383e-09	251
RAB8B	4.89323	4.34897	0.544266	2.19105e-08	5.64544	1.64762e-08	0.946333	6.55031e-09	42
CCNA2	4.41348	5.23646	-0.822977	7.6344e-08	-5.56202	2.66675e-08	-0.538631	6.67429e-09	59
EPHA6	-2.36319	-3.59148	1.22829	1.54553e-05	5.24834	1.53474e-07	0.811845	6.70994e-09	18
ROBO1	5.33647	4.53282	0.803646	1.75835e-06	5.56743	2.58519e-08	0.935764	6.71497e-09	32
ITGAL	4.78612	3.68598	1.10014	5.53554e-07	5.74499	9.19258e-09	0.90588	6.71649e-09	37
SERP2	0.0656323	-0.753175	0.818808	0.000224538	5.57561	2.46671e-08	0.705373	6.71712e-09	21
SMARCD2	6.15797	6.49814	-0.340173	0.000127623	-5.69646	1.22322e-08	-0.929292	6.74498e-09	153
PDZD8	6.48688	6.94352	-0.456635	0.000364577	-5.63402	1.76059e-08	-0.663245	6.7528e-09	101
TMPO	6.53315	6.90135	-0.368198	0.000132601	-5.44795	5.09525e-08	-0.658933	6.77713e-09	125
MCM6	5.17419	5.56191	-0.387718	5.88692e-05	-5.52284	3.33569e-08	-0.561986	6.77995e-09	102
TFAP4	3.80277	4.04327	-0.240493	0.0176912	-5.72785	1.01711e-08	-0.780546	6.94828e-09	131
ID1	5.42412	6.00073	-0.576608	0.00290871	-5.81251	6.15438e-09	-0.729312	7.14702e-09	182
HOXA9	-0.315807	0.28099	-0.596798	0.0687519	-5.64085	1.6921e-08	-0.588258	7.19483e-09	74
TBC1D31	2.84655	3.33589	-0.48934	2.3609e-06	-5.67813	1.36176e-08	-0.639662	7.5094e-09	66
SREBF1	6.35022	6.73563	-0.38541	0.00577735	-5.62429	1.86268e-08	-0.861767	7.55597e-09	93
MED10	3.86672	3.95788	-0.0911626	0.2723	-5.7691	7.96942e-09	-0.969679	7.727e-09	108
TAL1	0.910995	0.283735	0.627259	9.59887e-05	5.43604	5.44791e-08	0.931309	7.78807e-09	43
PDGFRA	5.93574	5.32655	0.609182	0.000450441	5.53726	3.07234e-08	0.943725	7.7973e-09	29
ZNF556	-1.94148	-1.73961	-0.201868	0.531636	-6.54335	6.01557e-11	-0.84187	8.01208e-09	57
RBM14	5.81887	6.07912	-0.260253	0.000103286	-5.69968	1.20031e-08	-0.808134	8.08434e-09	36
MYH11	9.25132	7.01308	2.23824	3.74691e-07	5.17029	2.33728e-07	0.833556	8.0935e-09	97
CD27	3.09134	1.83219	1.25916	8.15755e-07	5.60409	2.09354e-08	0.895149	8.10907e-09	22
FGF8	-4.04858	-3.89162	-0.15696	0.319845	-6.01508	1.79802e-09	-0.715458	8.14332e-09	39
HIVEP3	4.02462	3.44	0.584626	8.66893e-06	5.62351	1.87121e-08	0.96074	8.17835e-09	114
ZSCAN1	-3.80907	-4.04348	0.234407	0.151999	5.41574	6.10373e-08	0.85208	8.27815e-09	31
SIRT7	4.13346	4.4892	-0.355742	0.000287159	-5.50878	3.61321e-08	-0.821692	8.31226e-09	391
PRAM1	1.22869	0.250416	0.97827	2.07336e-07	5.6856	1.30356e-08	0.829618	8.39513e-09	22
ZNF436	4.12386	3.70448	0.419383	1.39153e-06	5.69821	1.21069e-08	0.883138	8.48377e-09	80
IQSEC1	5.95831	5.52813	0.430179	1.85724e-05	5.49056	4.00661e-08	0.895732	8.53081e-09	74
RAMP2	4.67295	3.92007	0.752887	2.30319e-06	5.55268	2.81329e-08	0.876382	8.63978e-09	59
TCF7L1	3.38265	2.72701	0.655634	4.55404e-05	5.36079	8.28582e-08	0.823188	8.64168e-09	124
ACTN2	-1.1457	-2.24654	1.10084	0.00207326	5.32463	1.01157e-07	0.810274	8.65353e-09	81
EPHA10	1.81351	2.72096	-0.907453	1.22525e-05	-5.43188	5.57641e-08	-0.793167	8.69296e-09	71
HOXD12	-4.50777	-4.25138	-0.256389	0.0835904	-6.07173	1.26538e-09	-0.842663	8.7015e-09	60
TLR3	3.72092	3.11126	0.609654	0.00185278	5.7951	6.82791e-09	0.837846	8.76442e-09	116
CDK2	4.46847	4.70195	-0.233472	0.0114242	-5.69692	1.21991e-08	-0.586225	8.83351e-09	28
PDE5A	5.2523	4.35603	0.896271	6.00017e-08	5.56781	2.57968e-08	0.8458	8.8516e-09	26
BARX2	1.56691	2.36626	-0.799347	0.013897	-5.34948	8.82083e-08	-0.895443	8.86187e-09	111
ARL11	1.10377	0.525768	0.578006	0.00397224	5.66379	1.48066e-08	0.931016	8.86754e-09	12
PDCD11	5.36708	5.73122	-0.364142	2.3706e-05	-5.73727	9.62125e-09	-0.679679	8.92434e-09	63
ITGB3	3.28366	2.4913	0.79236	4.93164e-06	5.33055	9.79142e-08	0.906761	8.95895e-09	24
VAV1	3.51648	2.4433	1.07318	8.43489e-09	5.62823	1.82063e-08	0.893373	8.98869e-09	66
LPP	8.83418	7.95992	0.874262	4.34664e-08	5.34895	8.84664e-08	0.870176	9.0321e-09	89
SHC4	0.0154454	-0.830506	0.845951	2.42934e-05	5.53122	3.1802e-08	0.893736	9.03562e-09	12
KLK6	0.660758	2.3325	-1.67174	0.00240484	-5.77964	7.48628e-09	-0.684441	9.49828e-09	65
ZDHHC22	-3.86804	-4.25604	0.388001	0.0372046	5.54013	3.02252e-08	0.637392	9.50387e-09	92
TBX20	-3.98855	-4.10663	0.118076	0.586334	5.57016	2.5451e-08	0.916805	9.58362e-09	64
ZNF333	3.10899	2.59631	0.512684	1.46184e-08	5.55322	2.80456e-08	0.821814	9.63364e-09	89
ANKDD1A	1.32837	0.773854	0.554516	1.25673e-05	5.36489	8.10007e-08	0.831018	9.72692e-09	75
SCMH1	5.11185	4.81361	0.298243	0.00217817	5.37368	7.71478e-08	0.774464	9.74568e-09	74
MAP2K5	3.50052	3.37413	0.126391	0.0650968	5.73717	9.62702e-09	0.857388	9.80059e-09	67
TCF23	-1.61761	-3.06169	1.44408	1.85885e-06	5.46473	4.63603e-08	0.929654	9.89401e-09	31
NPR3	0.899027	-0.0971607	0.996188	0.000541392	5.44469	5.18957e-08	0.943016	9.95519e-09	12
MEF2A	6.12594	5.59014	0.535803	2.0584e-08	5.59586	2.19536e-08	0.871795	1.00071e-08	78
CD53	5.38229	4.22971	1.15259	1.09391e-08	5.79128	6.98535e-09	0.85117	1.00778e-08	22
TBX1	-0.316613	-0.64084	0.324227	0.24208	5.54123	3.00354e-08	0.828152	1.01118e-08	66
STX2	3.61396	3.07905	0.534911	2.25153e-05	5.14141	2.72691e-07	0.793927	1.02993e-08	47
RHOH	3.00435	1.77345	1.2309	8.08082e-09	5.6625	1.49182e-08	0.928757	1.03628e-08	15
RABIF	3.79725	3.89586	-0.0986099	0.122582	-5.66012	1.51264e-08	-0.686571	1.0384e-08	37
LRRN3	-0.481423	-1.19919	0.717767	0.000615934	5.38402	7.2842e-08	0.86554	1.0421e-08	20
FUBP3	5.57425	5.66699	-0.0927399	0.0956181	-5.76036	8.39342e-09	-0.881474	1.04678e-08	132
P2RX2	-2.10659	-3.53876	1.43218	1.27791e-08	5.41146	6.25113e-08	0.770971	1.0566e-08	35
KNG1	-3.38747	-2.82072	-0.566746	0.0277595	-6.33224	2.41627e-10	-0.835085	1.07788e-08	102
CORO1C	6.76457	6.40363	0.360938	3.48076e-05	5.53098	3.18452e-08	0.709776	1.08676e-08	64
GMPS	5.88804	6.16537	-0.277326	0.00032654	-5.55675	2.74838e-08	-0.639852	1.09581e-08	52
SUDS3	5.33337	5.4086	-0.0752355	0.250425	-5.68697	1.29316e-08	-0.881589	1.09703e-08	97
RBM39	6.80715	7.1069	-0.299755	3.74916e-05	-5.68844	1.28204e-08	-0.851853	1.11074e-08	83
RASD2	2.61074	2.00224	0.608493	0.00103346	5.13893	2.76304e-07	0.857014	1.11448e-08	16
NR2E1	-4.04847	-3.27222	-0.776258	0.00149704	-5.59563	2.19818e-08	-0.942495	1.11674e-08	78
LZTS1	3.56525	2.75808	0.807172	5.65076e-06	5.32718	9.97496e-08	0.741234	1.11676e-08	169
RSU1	6.09757	5.76351	0.334059	6.05165e-06	5.17894	2.23151e-07	0.788562	1.11899e-08	25
PKIG	4.95453	4.14132	0.813213	2.26306e-08	5.37045	7.85417e-08	0.691368	1.13741e-08	66
DDAH1	6.54672	6.99342	-0.446698	0.000156028	-5.2508	1.51437e-07	-0.825559	1.13984e-08	49
VIP	-0.0511278	-2.1125	2.06137	3.14343e-07	5.03116	4.87528e-07	0.809129	1.14127e-08	13
ECT2	5.61847	6.58133	-0.962853	5.70927e-10	-5.5382	3.05589e-08	-0.586506	1.17057e-08	65
TACR2	2.13588	0.544404	1.59148	9.20139e-05	5.11776	3.09188e-07	0.796784	1.18691e-08	11
IRF5	3.47851	3.00525	0.473262	0.000580431	5.49327	3.94564e-08	0.951648	1.20152e-08	68
DAP3	5.84217	6.1284	-0.286237	0.000139998	-5.75825	8.49899e-09	-0.825993	1.20829e-08	96
POU3F3	-3.23437	-3.6489	0.414531	0.169401	5.32639	1.00185e-07	0.808679	1.21668e-08	57
REXO4	4.05311	4.33097	-0.27786	0.00121605	-5.49238	3.96556e-08	-0.884719	1.22058e-08	64
PLAT	5.63888	5.33994	0.298945	0.0330544	5.33542	9.53211e-08	0.845393	1.24948e-08	40
CSPG4	5.64999	4.94703	0.70296	0.000378375	5.14112	2.73108e-07	0.839899	1.25641e-08	25
DGKQ	4.25084	4.55121	-0.300365	0.00615519	-5.66941	1.43293e-08	-0.802848	1.25914e-08	63
ITGAD	-1.41046	-2.90222	1.49177	1.2117e-09	5.65944	1.51866e-08	0.827573	1.26598e-08	8
SORBS1	6.49073	5.33139	1.15934	1.42112e-05	5.01337	5.34855e-07	0.805749	1.27327e-08	38
GJA1	5.45006	4.70761	0.742452	1.92035e-05	5.28692	1.24396e-07	0.753461	1.28336e-08	33
EDNRA	4.3736	3.43605	0.937557	2.13578e-07	5.44476	5.18759e-08	0.839589	1.29239e-08	24
GTF2IRD1	4.69795	5.19752	-0.499571	2.17914e-05	-5.66898	1.43653e-08	-0.903158	1.31452e-08	116
TCL1A	-0.105062	-1.79821	1.69315	2.99864e-05	5.23299	1.66793e-07	0.927379	1.32317e-08	13
PRKACA	6.03246	5.69432	0.33814	2.17253e-06	5.505	3.69166e-08	0.837502	1.34041e-08	176
VEZF1	5.83502	5.67672	0.158309	0.018398	5.5374	3.07e-08	0.841826	1.34056e-08	43
CD4	5.69989	4.78715	0.912736	1.87845e-07	5.68607	1.29998e-08	0.880226	1.34118e-08	22
NLRP3	1.35397	0.602344	0.751629	7.65038e-05	5.59212	2.24308e-08	0.854829	1.34762e-08	13
HOXC13	-2.55626	-1.0039	-1.55237	0.000685594	-6.05057	1.44337e-09	-0.792614	1.38193e-08	101
HMGA1	7.93676	8.68654	-0.749788	9.01089e-07	-5.42614	5.75861e-08	-0.762984	1.38246e-08	70
ZNF707	2.80107	3.03607	-0.235004	0.00990168	-5.74456	9.21579e-09	-0.809578	1.38851e-08	80
TEF	3.86704	3.49665	0.370391	0.00367343	5.50879	3.61317e-08	0.603341	1.38923e-08	128
AGAP11	-0.974608	-1.9176	0.942988	0.000886145	5.44237	5.25775e-08	0.80298	1.40917e-08	52
ABRA	-2.85059	-3.37707	0.526478	0.00410862	5.28726	1.24162e-07	0.903814	1.43426e-08	27
MOAP1	4.22442	4.08748	0.136937	0.0834397	5.49438	3.92079e-08	0.659306	1.4344e-08	35
ZNF555	2.08965	1.7157	0.37395	9.11493e-05	5.4715	4.46253e-08	0.847453	1.4471e-08	54
ACVR1	5.04314	4.86855	0.174588	0.0224894	5.37553	7.6357e-08	0.865725	1.4545e-08	32
FAM13B	4.91815	4.29531	0.622839	3.79923e-09	5.47138	4.46537e-08	0.859546	1.46066e-08	95
ATN1	7.40991	7.22138	0.188532	0.0178989	5.53108	3.18257e-08	0.796898	1.46729e-08	171
STARD8	3.05622	2.4059	0.650324	3.25563e-06	5.47413	4.39673e-08	0.936594	1.48191e-08	26
CD86	3.32663	2.49528	0.831341	2.79274e-06	5.61439	1.97261e-08	0.800705	1.48756e-08	402
NFXL1	3.08647	3.59863	-0.51216	3.11541e-07	-5.47493	4.37691e-08	-0.755939	1.53034e-08	138
ACTL6A	5.07155	5.56852	-0.496975	9.35976e-08	-5.51331	3.52144e-08	-0.683076	1.53355e-08	41
BMPR1B	0.915855	-0.134723	1.05058	0.00287055	5.40274	6.56321e-08	0.898123	1.6164e-08	13
CLEC2D	3.09932	2.13616	0.963167	6.11303e-07	5.51508	3.48625e-08	0.99529	1.62518e-08	23
MECP2	6.01907	5.66322	0.355843	4.86221e-06	5.38456	7.26206e-08	0.792977	1.6295e-08	123
CBX6	5.877	4.89886	0.97814	1.42434e-06	5.34791	8.89746e-08	0.841577	1.63643e-08	236
ZNF362	4.76732	4.30697	0.460359	1.25381e-05	5.37386	7.70681e-08	0.802366	1.66354e-08	122
ATF7	6.23827	6.02352	0.21475	0.000422375	5.54385	2.95888e-08	0.813513	1.67052e-08	56
ZNF443	1.56873	1.9378	-0.369073	0.00024453	-5.71284	1.11107e-08	-0.824451	1.67583e-08	58
ASB5	-1.24299	-2.94274	1.69975	0.000200484	5.00427	5.60727e-07	0.817249	1.69844e-08	12
CD19	1.34122	-0.0610069	1.40223	7.16726e-06	5.36476	8.10556e-08	0.954275	1.71682e-08	13
TYMS	4.65874	5.26643	-0.607697	4.52395e-05	-5.26561	1.39726e-07	-0.655219	1.72393e-08	39
TTF2	4.33292	4.68258	-0.349663	0.000246371	-5.42316	5.85541e-08	-0.588684	1.72837e-08	128
SLAMF1	1.71421	0.810903	0.903305	3.48831e-06	5.48953	4.03008e-08	0.897206	1.74718e-08	10
SETD7	6.42789	5.98894	0.438952	0.000181153	5.52423	3.30928e-08	0.760787	1.76023e-08	170
CD22	2.98669	0.97282	2.01387	2.56796e-09	5.38197	7.36746e-08	0.95928	1.76234e-08	16
NUP93	4.97293	5.17931	-0.206383	0.010107	-5.50856	3.61783e-08	-0.743365	1.76566e-08	46
RNF6	5.16675	5.56219	-0.395442	2.64556e-06	-5.38694	7.1669e-08	-0.738321	1.77416e-08	96
ZNF132	1.29139	0.688542	0.602853	1.41496e-05	5.44366	5.21976e-08	0.799307	1.77977e-08	39
PTK2	6.37535	6.68289	-0.307536	8.62806e-05	-5.45523	4.89106e-08	-0.79167	1.78918e-08	59
ZC3H10	2.60787	2.29452	0.313352	4.66995e-05	5.31786	1.04992e-07	0.794082	1.81172e-08	121
NCOA7	6.38612	6.85114	-0.465022	0.000339434	-5.17516	2.27721e-07	-0.72365	1.81622e-08	100
HOXD8	0.965681	0.514371	0.45131	0.000246967	5.35235	8.68188e-08	0.890873	1.82375e-08	39
ZC3H6	3.78666	3.35543	0.431225	0.000407503	5.3542	8.59336e-08	0.778483	1.83518e-08	81
FOXC2	0.615234	-0.162554	0.777788	0.000642327	5.50243	3.74593e-08	0.882909	1.83971e-08	63
NIF3L1	3.88796	4.16782	-0.279857	2.72978e-05	-5.5359	3.09638e-08	-0.855822	1.86767e-08	60
ARHGAP9	3.58514	2.53736	1.04779	1.03825e-08	5.50452	3.70168e-08	0.913463	1.8699e-08	11
RASEF	4.52013	5.26718	-0.747053	0.000512987	-5.37489	7.66314e-08	-0.835084	1.87384e-08	55
ATXN3	4.40723	4.21578	0.191452	0.0057425	5.38323	7.31609e-08	0.84259	1.89008e-08	176
PRKAR1B	3.84242	3.94347	-0.101047	0.469575	-5.57484	2.47762e-08	-0.900129	1.89438e-08	72
SP100	6.04952	5.75377	0.295747	0.000648075	5.45271	4.96092e-08	0.880128	1.90497e-08	90
CAMLG	4.44844	4.0874	0.361047	2.50628e-05	5.66622	1.4598e-08	0.770489	1.91748e-08	44
TYROBP	5.75332	4.73577	1.01755	1.77886e-07	5.92718	3.08178e-09	0.866152	1.91802e-08	34
XPC	4.88609	4.80547	0.0806218	0.270549	5.39975	6.6733e-08	0.924747	1.93395e-08	67
CDK6	5.99754	6.34243	-0.344884	0.0523493	-5.55817	2.7262e-08	-0.674972	1.96635e-08	60
KLRK1	1.35931	0.239098	1.12021	7.87577e-06	5.78893	7.08354e-09	0.875127	1.97488e-08	16
P2RY10	1.75285	0.409116	1.34373	6.51115e-08	5.50773	3.63487e-08	0.897767	1.98764e-08	27
BRIP1	2.65509	3.24605	-0.590956	2.87697e-05	-5.40638	6.43124e-08	-0.59715	1.98933e-08	52
TARBP1	4.61756	5.14776	-0.530205	7.99081e-07	-5.47456	4.38605e-08	-0.710245	2.00871e-08	174
SH2B3	5.80923	5.29706	0.512164	2.04588e-07	5.56223	2.66356e-08	0.878557	2.05541e-08	23
ARHGEF19	2.43434	3.24241	-0.808071	2.89194e-06	-5.57816	2.43081e-08	-0.890229	2.07226e-08	85
RADIL	0.15498	-1.10081	1.25579	1.05366e-07	5.44188	5.27216e-08	0.831305	2.10082e-08	22
ID3	4.90366	4.63225	0.271402	0.0589441	5.44157	5.28138e-08	0.735236	2.11961e-08	110
NOX1	-0.876188	0.399266	-1.27545	0.00577696	-5.62002	1.90931e-08	-0.566936	2.12231e-08	54
BRCA1	4.02281	4.63084	-0.608035	4.4889e-06	-5.41296	6.19912e-08	-0.571356	2.14757e-08	85
FEN1	4.5291	5.03321	-0.504106	7.05889e-06	-5.29064	1.21889e-07	-0.692491	2.15038e-08	81
GLIS1	0.0456879	-0.688338	0.734025	0.000193366	5.21754	1.81317e-07	0.77009	2.15543e-08	58
GATA6	5.62412	6.12747	-0.503352	0.00684058	-5.24802	1.53739e-07	-0.756382	2.21319e-08	136
PLCB3	5.8631	6.34323	-0.480131	0.000321093	-5.37008	7.87002e-08	-0.780824	2.24356e-08	99
ZBTB5	3.89425	4.20797	-0.313716	0.000799572	-5.4615	4.72138e-08	-0.914408	2.24859e-08	48
RGS7BP	0.931256	-0.0281733	0.959429	3.26275e-05	5.38897	7.0864e-08	0.931925	2.26621e-08	37
IL5RA	-1.8107	-2.62559	0.81489	0.000267395	5.19735	2.02148e-07	0.808374	2.28152e-08	29
MAPK6	5.5258	5.9805	-0.454699	9.51639e-06	-5.17855	2.23615e-07	-0.802929	2.28181e-08	64
TGIF1	5.48664	5.89022	-0.403583	1.64893e-05	-5.46321	4.67609e-08	-0.560947	2.28342e-08	112
RGS5	7.77104	7.31657	0.454474	0.0137037	5.04052	4.64278e-07	0.786121	2.29224e-08	30
SRSF2	7.1282	7.32462	-0.196424	0.00240822	-5.51636	3.46083e-08	-0.732409	2.32612e-08	158
MSI2	5.92807	6.24039	-0.31232	0.000768342	-5.35042	8.77522e-08	-0.716468	2.38718e-08	47
LCP1	6.9868	6.01599	0.970811	8.13525e-07	5.63354	1.76546e-08	0.84972	2.40078e-08	11
ZNF207	7.20795	7.3885	-0.180548	0.000950533	-5.54084	3.01022e-08	-0.659853	2.40287e-08	90
PRKD3	4.97786	4.71285	0.265008	0.0424192	5.38503	7.2433e-08	0.885868	2.42365e-08	79
CSF1R	5.59164	4.52578	1.06585	1.65667e-07	5.6341	1.7597e-08	0.908151	2.43351e-08	22
MS4A4A	3.45735	2.1433	1.31405	1.81282e-10	5.5878	2.29966e-08	0.841586	2.43365e-08	26
SOCS7	4.19394	4.49444	-0.300496	0.00382525	-5.52176	3.35628e-08	-0.814633	2.4383e-08	92
FOSB	4.67271	4.26045	0.41226	0.170517	5.24069	1.59975e-07	0.647806	2.47895e-08	39
GRM8	-1.56643	-0.587346	-0.979081	9.35856e-06	-5.861	4.60098e-09	-0.619395	2.48204e-08	24
MSX2	2.2921	3.33484	-1.04275	2.36928e-06	-5.20402	1.95026e-07	-0.610134	2.48367e-08	56
MKI67	7.0761	7.80693	-0.730832	3.00906e-06	-5.29795	1.1711e-07	-0.49192	2.49335e-08	31
ZNF696	2.25243	2.60143	-0.348999	0.000484421	-5.61663	1.94716e-08	-0.792596	2.49417e-08	115
ERC1	5.96583	5.5905	0.375324	2.24995e-05	5.39376	6.89973e-08	0.718471	2.50014e-08	37
HOXA5	2.35285	1.70818	0.64467	0.000802161	5.3485	8.86843e-08	0.801069	2.50516e-08	39
GCLC	5.14048	5.43843	-0.297949	0.00258499	-5.41889	5.99702e-08	-0.902648	2.51048e-08	134
LRP5	6.86061	7.3963	-0.535691	3.8241e-06	-5.34133	9.22658e-08	-0.824057	2.53701e-08	50
SSRP1	6.72252	7.03047	-0.307947	3.69778e-05	-5.44557	5.16385e-08	-0.826847	2.59405e-08	104
COPS5	5.14095	5.22589	-0.0849377	0.264474	-5.53335	3.14165e-08	-0.896024	2.60085e-08	132
MYBL1	2.20609	1.6324	0.573688	0.000439523	5.29093	1.21698e-07	0.808045	2.60532e-08	100
HGF	3.00884	1.89862	1.11022	5.1305e-08	5.29763	1.17315e-07	0.874046	2.61099e-08	26
SMYD1	-0.977833	-2.55733	1.5795	0.00236172	4.89996	9.58565e-07	0.839472	2.63509e-08	88
ZNF665	0.243541	-0.292638	0.536179	0.0129214	5.47865	4.28592e-08	0.800253	2.64653e-08	27
SMOC2	5.84138	4.2658	1.57558	3.15106e-08	5.27445	1.33155e-07	0.841431	2.65756e-08	13
OPN1SW	-2.55688	-2.73083	0.173957	0.222318	5.26261	1.42025e-07	0.783727	2.65762e-08	56
SFPQ	7.38578	7.58324	-0.197454	0.000249208	-5.40735	6.39648e-08	-0.759053	2.66459e-08	47
SMARCA4	6.77045	7.06162	-0.291177	0.000901508	-5.25133	1.51009e-07	-0.763951	2.67008e-08	64
CNOT3	5.46169	5.69559	-0.233898	0.00449836	-5.44829	5.08561e-08	-0.878444	2.67571e-08	123
DDX10	4.35105	4.63501	-0.283961	0.000495846	-5.64761	1.62697e-08	-0.739919	2.68898e-08	57
ITGBL1	3.8961	2.40791	1.48819	2.45529e-05	5.6644	1.47539e-08	0.810647	2.708e-08	21
ZNF358	5.88022	5.42548	0.454737	0.000374748	5.35379	8.61295e-08	0.73247	2.71228e-08	217
PRSS8	6.35481	7.25497	-0.900159	9.15002e-06	-5.34622	8.98079e-08	-0.784635	2.72111e-08	121
OMP	-2.93639	-2.70471	-0.231677	0.166369	-5.28792	1.23716e-07	-0.777354	2.73123e-08	67
AMBP	-1.33548	-0.391195	-0.944285	0.00134131	-5.32753	9.95589e-08	-0.765166	2.7516e-08	85
CD209	3.28374	2.45537	0.828363	0.000171806	5.38406	7.28256e-08	0.889454	2.77503e-08	10
APBB1	3.62812	2.66971	0.958402	1.04203e-06	5.42618	5.75738e-08	0.77155	2.78723e-08	105
DGKB	-1.56718	-2.24563	0.678454	0.00529761	4.93222	8.12991e-07	0.712887	2.79154e-08	22
ZNF512	4.65487	4.1517	0.503167	7.36672e-07	5.28231	1.27565e-07	0.800274	2.79967e-08	41
NISCH	5.98551	5.65656	0.328952	6.89296e-05	5.37469	7.67128e-08	0.808679	2.8313e-08	31
ITGA7	4.51034	3.40069	1.10965	8.66889e-07	5.06193	4.15031e-07	0.821411	2.84776e-08	36
MTA2	6.2818	6.4243	-0.142498	0.0406193	-5.35957	8.34206e-08	-0.805408	2.86558e-08	117
SRF	6.39884	6.15534	0.243501	0.0139297	5.04298	4.58327e-07	0.778259	2.88211e-08	66
FOXK2	5.81523	6.03613	-0.220904	0.00203739	-5.38091	7.4109e-08	-0.832188	2.93634e-08	100
KLRB1	1.5724	0.552272	1.02012	3.94319e-07	5.60061	2.13598e-08	0.784462	2.94127e-08	23
PRDM2	5.46582	5.14647	0.319351	1.07148e-05	5.3071	1.11386e-07	0.852876	2.94539e-08	65
SLA	4.14089	3.08383	1.05706	5.50934e-08	5.44128	5.28995e-08	0.956478	2.96024e-08	15
ZFP69B	0.7982	0.842635	-0.0444348	0.718531	-5.63443	1.75643e-08	-0.762587	2.97862e-08	100
INPP4A	5.01456	4.62813	0.386427	7.44236e-06	5.55144	2.8333e-08	0.859031	3.00966e-08	28
TMOD2	3.56836	3.04769	0.520666	0.000497844	5.38475	7.25469e-08	0.843242	3.01263e-08	44
SMAD9	3.36679	2.18651	1.18027	9.87697e-07	5.25204	1.50427e-07	0.769275	3.02287e-08	67
ACKR3	3.79372	3.46107	0.332643	0.0267834	5.31838	1.04698e-07	0.816765	3.03051e-08	29
PIK3CG	3.23788	1.98495	1.25293	1.76081e-08	5.41489	6.13277e-08	0.894827	3.2015e-08	20
ZBTB38	6.58347	6.28868	0.294785	0.00118652	5.50083	3.78012e-08	0.879313	3.2784e-08	83
DOT1L	5.71357	6.0152	-0.301628	0.0017557	-5.36857	7.93641e-08	-0.793265	3.27879e-08	83
ARHGEF15	3.42149	2.7045	0.716992	8.02948e-07	5.2852	1.25565e-07	0.932269	3.28357e-08	25
PSD	2.88943	1.38494	1.50449	1.27752e-07	5.16487	2.40604e-07	0.801349	3.30063e-08	22
ITGB1BP2	-0.369674	-1.12488	0.755204	3.25097e-05	4.88603	1.02891e-06	0.764503	3.30797e-08	26
MAP4K1	3.14925	1.99669	1.15256	1.56272e-07	5.38	7.44869e-08	0.902007	3.34418e-08	13
TAGAP	3.52402	2.28042	1.2436	5.22654e-09	5.57653	2.45366e-08	0.903515	3.38361e-08	9
TFAP2C	0.0296961	0.964325	-0.934629	0.00824084	-5.55896	2.71387e-08	-0.83982	3.43464e-08	105
RNF2	3.9544	4.10462	-0.150214	0.0839601	-5.39386	6.89592e-08	-0.686313	3.43526e-08	235
TARDBP	6.50075	6.69039	-0.189637	0.000103498	-5.34498	9.04279e-08	-0.675521	3.44431e-08	72
GPR39	2.54352	3.3147	-0.771187	2.61118e-05	-5.16408	2.41628e-07	-0.747134	3.44891e-08	74
ZNF511	4.05478	3.99602	0.0587586	0.619221	-5.44488	5.18394e-08	-0.759754	3.45463e-08	125
NFIB	6.51666	6.08157	0.435092	0.00638793	5.40786	6.37825e-08	0.912968	3.47222e-08	111
ZNF366	1.44762	0.742021	0.705603	1.19789e-05	5.35148	8.7236e-08	0.9423	3.47275e-08	114
SMAD7	3.96541	3.71158	0.253827	0.035384	5.25617	1.47086e-07	0.80312	3.47837e-08	126
GPR55	-1.00825	-1.74819	0.739937	0.000385393	5.36023	8.31152e-08	0.910664	3.48075e-08	8
ZNF398	4.29564	4.47665	-0.181011	0.0122408	-5.44557	5.16393e-08	-0.878976	3.48917e-08	76
CRTC1	4.13578	3.92122	0.214565	0.0250274	5.11998	3.05569e-07	0.664332	3.51582e-08	133
PROX1	2.01346	2.92739	-0.913926	0.0109528	-5.7441	9.24105e-09	-0.966372	3.55352e-08	147
MAS1L	-4.12987	-4.57957	0.449705	0.000771041	5.34615	8.98457e-08	0.650745	3.56168e-08	33
SNAPC2	3.72435	3.46534	0.259015	0.0137539	5.46581	4.60804e-08	0.85154	3.63347e-08	77
ETV1	3.16641	2.63693	0.529475	0.00343027	5.43425	5.50283e-08	0.864268	3.65984e-08	64
BRCC3	4.70259	4.96574	-0.263152	0.00517958	-5.49073	4.00287e-08	-0.716439	3.67851e-08	25
RASAL3	3.79135	2.76269	1.02866	1.31244e-08	5.25607	1.47169e-07	0.95269	3.73843e-08	22
SUV39H2	3.07463	3.48964	-0.415012	4.54367e-05	-5.42512	5.7914e-08	-0.574413	3.75816e-08	113
RABEP1	5.41558	5.15246	0.263123	0.000885685	5.35775	8.42635e-08	0.86169	3.76601e-08	70
SPRY1	5.47435	5.21321	0.261138	0.00678782	5.31371	1.07418e-07	0.863536	3.77418e-08	11
ASCC1	4.43302	4.34816	0.0848563	0.295361	5.54547	2.93171e-08	0.759011	3.81619e-08	148
BMP3	0.094333	-1.50158	1.59592	0.000625084	5.00986	5.44699e-07	0.80755	3.8368e-08	79
TAB2	6.34351	6.12698	0.216528	0.00109868	5.5131	3.52566e-08	0.807623	3.85611e-08	28
NR0B1	-4.57149	-4.61568	0.0441968	0.717087	5.17105	2.32781e-07	0.545661	3.88919e-08	80
PRMT5	5.23578	5.6727	-0.436928	6.18266e-06	-5.53092	3.18553e-08	-0.760008	3.91738e-08	61
SERTAD2	4.84972	4.712	0.137722	0.0880377	5.49422	3.92452e-08	0.717174	3.99311e-08	159
DEPDC1	3.21703	4.04379	-0.826754	1.05556e-06	-5.35154	8.72104e-08	-0.551341	3.99532e-08	95
PTPRS	4.99902	4.20634	0.792685	0.000892357	5.30459	1.12928e-07	0.781494	4.05062e-08	29
SLC4A11	2.5554	3.54257	-0.987162	0.000133597	-5.05597	4.28198e-07	-0.586042	4.06859e-08	26
HIC1	4.76628	3.77269	0.993586	2.51682e-09	5.27072	1.35893e-07	0.908525	4.10431e-08	159
ALK	-2.28318	-3.35368	1.0705	5.71863e-07	5.16982	2.34317e-07	0.749151	4.12173e-08	22
PLXNA4	2.85089	1.2834	1.56749	1.11516e-08	5.03715	4.72504e-07	0.903106	4.19455e-08	12
P2RY13	2.17688	1.06926	1.10762	6.39495e-07	5.52638	3.26907e-08	0.83015	4.21851e-08	9
ZKSCAN7	0.771794	-0.283204	1.055	7.92031e-09	5.25254	1.50017e-07	0.799421	4.23297e-08	33
NCLN	6.46534	6.7461	-0.280753	0.00516928	-5.34163	9.21153e-08	-0.799514	4.26253e-08	99
GRIA3	-1.48112	-2.42898	0.947856	8.45364e-07	5.43035	5.62448e-08	0.451602	4.26981e-08	32
CBX2	2.32706	2.98707	-0.660007	0.00413069	-5.39237	6.95349e-08	-0.690968	4.30488e-08	68
DOK4	5.16822	5.75296	-0.584734	1.40346e-05	-5.04637	4.50287e-07	-0.79092	4.34468e-08	71
ZNF536	-0.831388	-1.62506	0.793671	0.00465358	5.13612	2.80468e-07	0.634841	4.34502e-08	84
RARB	2.35756	1.71262	0.644946	2.78642e-05	5.41631	6.08424e-08	0.822833	4.35204e-08	51
ZNF799	1.86112	2.08298	-0.221862	0.0119747	-5.48678	4.09318e-08	-0.730135	4.35697e-08	50
KRBA2	1.08206	0.651748	0.430316	0.0016016	5.32296	1.02093e-07	0.804746	4.35903e-08	216
TFG	6.80718	7.10967	-0.302494	0.000116392	-5.25673	1.46638e-07	-0.650312	4.38328e-08	38
PDX1	2.68904	3.59467	-0.90563	0.00234238	-5.17731	2.25108e-07	-0.74026	4.39008e-08	134
ASGR2	-1.7294	-1.95871	0.229309	0.343359	5.54117	3.00456e-08	0.913114	4.40802e-08	14
CHRNB4	-0.829178	-1.54203	0.712854	0.00192695	5.23251	1.67226e-07	0.736329	4.4597e-08	30
GPR89A	3.95179	4.33787	-0.386081	9.62421e-06	-5.42801	5.69854e-08	-0.881009	4.48248e-08	41
ACVRL1	4.4817	4.06561	0.416096	0.000680195	5.35175	8.71065e-08	0.873678	4.50472e-08	27
HDAC1	6.78537	6.95891	-0.17354	0.106609	-5.2789	1.29961e-07	-0.846695	4.53721e-08	31
IL22	-4.43636	-4.10441	-0.331949	0.0633204	-5.46276	4.68781e-08	-0.83644	4.54027e-08	83
TFEC	2.73867	1.77359	0.965086	2.64859e-06	5.46557	4.61433e-08	0.74239	4.54681e-08	215
EPHA7	1.57894	0.0708141	1.50812	9.98127e-05	4.91537	8.8614e-07	0.782774	4.58434e-08	31
ZNF57	2.09448	2.58151	-0.487034	2.82798e-05	-5.1283	2.92377e-07	-0.824016	4.5982e-08	169
SAFB	5.83096	5.96437	-0.133408	0.0116264	-5.36201	8.22995e-08	-0.826748	4.6309e-08	94
HR	5.063	5.35615	-0.293147	0.234561	-5.08728	3.63238e-07	-0.94193	4.65729e-08	68
MS4A1	3.16384	0.696992	2.46685	7.8155e-08	5.12147	3.03158e-07	0.868054	4.66768e-08	23
FOXQ1	4.28813	5.40657	-1.11844	1.44388e-05	-5.21398	1.84835e-07	-0.749527	4.68255e-08	108
DNAJA3	5.3644	5.56944	-0.205037	0.0125918	-5.37377	7.71066e-08	-0.883087	4.7811e-08	47
DPYSL5	-2.34455	-2.78778	0.443232	0.184179	5.29004	1.22288e-07	0.855852	4.78127e-08	22
EHF	5.63871	6.25946	-0.620748	0.000299837	-4.99904	5.7615e-07	-0.733582	4.82808e-08	133
POLE	5.41259	5.81065	-0.398062	5.67668e-05	-5.2428	1.58161e-07	-0.737306	4.83168e-08	61
PPP1R13L	4.92687	5.36177	-0.434897	0.00231606	-5.16091	2.45748e-07	-0.622945	4.88963e-08	219
TBC1D22B	3.67956	3.92551	-0.245949	0.00142243	-5.4365	5.43381e-08	-0.867354	4.89385e-08	43
TYRO3	3.47265	3.83487	-0.362225	0.00907664	-5.33665	9.468e-08	-0.7797	4.91171e-08	44
GSPT1	6.99667	7.10575	-0.10908	0.0978828	-5.25211	1.5037e-07	-0.707898	4.95844e-08	31
FANCC	3.38732	3.61398	-0.226657	0.00782968	-5.45465	4.90699e-08	-0.645621	4.98967e-08	61
NCS1	4.82068	3.91509	0.905591	4.84813e-05	4.87848	1.06907e-06	0.795911	5.08966e-08	31
PINK1	5.46973	5.1574	0.312335	0.000692349	5.22046	1.78478e-07	0.690399	5.15786e-08	53
APPL2	5.20204	5.53318	-0.331143	0.000432185	-4.90434	9.37404e-07	-0.80217	5.19482e-08	62
DCDC1	-2.93602	-2.52153	-0.414489	0.055309	-5.91843	3.25037e-09	-0.784112	5.22758e-08	54
PTGER1	0.768166	-0.348455	1.11662	2.32238e-05	5.09962	3.40337e-07	0.810303	5.23967e-08	34
CDK12	6.04108	6.43516	-0.394073	0.000250504	-5.47786	4.30494e-08	-0.65344	5.32355e-08	103
LTA	0.125448	-1.00108	1.12653	6.6571e-08	5.29516	1.18914e-07	0.849358	5.3253e-08	11
ITGA4	4.08728	3.31973	0.767556	1.04554e-05	5.46085	4.73864e-08	0.752804	5.33047e-08	18
ARHGEF2	6.00951	5.82446	0.185048	0.0278399	5.19631	2.03285e-07	0.850993	5.36574e-08	32
BTG1	6.91523	6.53894	0.376294	0.000306112	5.32312	1.02001e-07	0.650522	5.40391e-08	191
LIF	3.73723	4.21429	-0.477058	0.0106985	-5.34078	9.25483e-08	-0.45792	5.48168e-08	216
ZDHHC11	1.03669	1.97786	-0.941167	4.57796e-05	-5.45605	4.8684e-08	-0.839249	5.52005e-08	88
GBX2	-3.88532	-3.46277	-0.422552	0.0610422	-5.26841	1.37608e-07	-0.675396	5.52092e-08	55
ARHGEF3	4.78284	4.59233	0.190515	0.0485108	5.3077	1.11018e-07	0.863957	5.60081e-08	62
KHDRBS1	6.83961	6.92452	-0.0849131	0.11403	-5.41053	6.28381e-08	-0.66443	5.66512e-08	62
EOMES	1.6428	0.530948	1.11185	1.9508e-05	5.2888	1.2312e-07	0.870721	5.69014e-08	71
ZMAT4	-3.96394	-4.27481	0.310865	0.0389825	5.19532	2.04365e-07	0.64729	5.71984e-08	99
FLRT1	-0.446732	-1.11843	0.671697	0.00137692	4.91425	8.91244e-07	0.710453	5.73093e-08	17
SALL2	2.1547	1.01663	1.13807	2.05441e-05	5.18213	2.19367e-07	0.761285	5.73313e-08	124
RAB17	2.99207	3.6761	-0.684034	1.76915e-06	-4.89931	9.61732e-07	-0.663419	5.77177e-08	56
LHX6	2.07017	1.29313	0.777043	7.8723e-06	4.99297	5.94568e-07	0.855811	5.83916e-08	41
RGMB	5.26131	4.44947	0.811842	3.95974e-07	5.04529	4.52823e-07	0.686426	5.8467e-08	16
URI1	5.73983	6.14886	-0.409035	0.00422653	-5.50927	3.60316e-08	-0.915143	5.88462e-08	219
LITAF	7.05757	6.74844	0.309129	0.00336806	5.31943	1.04095e-07	0.862592	5.89444e-08	144
ZNF488	1.54683	2.37018	-0.823353	0.00139573	-5.04623	4.50621e-07	-0.754399	5.89913e-08	122
CCR6	2.12206	1.50792	0.614135	0.03855	-5.51794	3.42992e-08	-0.705912	5.91903e-08	51
CIDEA	-3.50198	-4.40744	0.90546	1.31551e-05	5.05667	4.26651e-07	0.576305	5.92138e-08	66
ITGB4	8.22588	8.74287	-0.516985	0.00520037	-5.32131	1.03023e-07	-0.748782	6.06512e-08	59
ZNF600	3.18476	3.57265	-0.387882	0.00120991	-5.28548	1.25376e-07	-0.797119	6.11611e-08	70
GPR162	0.489083	-0.328046	0.817129	1.15458e-07	5.2379	1.6241e-07	0.88613	6.19194e-08	26
ZNF727	-1.92414	-2.95257	1.02842	3.72534e-05	5.35117	8.73861e-08	0.797701	6.28884e-08	21
ANTXR1	7.12307	6.14919	0.973876	1.18881e-07	5.42438	5.81563e-08	0.664542	6.29127e-08	42
ITGA8	3.62783	2.52027	1.10756	3.55983e-06	4.88749	1.0213e-06	0.7499	6.30785e-08	32
THY1	6.98357	6.05504	0.928528	6.68734e-08	5.13753	2.78376e-07	0.716622	6.35581e-08	74
HOXB13	1.16519	2.09057	-0.925386	0.0332542	-5.46283	4.68598e-08	-0.63098	6.40429e-08	73
CR1	2.82039	1.11789	1.7025	1.62107e-08	5.44183	5.27372e-08	0.836191	6.41776e-08	8
ZNF385A	4.99258	4.63466	0.357923	0.0253886	5.2618	1.42654e-07	0.914389	6.427e-08	110
SLC9A3R1	6.53466	7.06004	-0.525387	8.59071e-05	-5.19301	2.06926e-07	-0.783352	6.49023e-08	95
ARHGAP11A	4.47057	5.20162	-0.73105	7.79486e-08	-5.2449	1.56369e-07	-0.590598	6.50521e-08	62
RASGRF2	3.272	2.68621	0.585788	1.61893e-05	5.20859	1.9028e-07	0.781334	6.55731e-08	39
ENG	7.23595	6.60717	0.628786	7.12089e-07	5.22002	1.78902e-07	0.900696	6.57875e-08	39
CDH2	1.39968	0.146258	1.25342	1.26843e-06	5.33478	9.56581e-08	0.801352	6.65043e-08	41
ZNF195	3.90586	4.32945	-0.423588	5.34107e-06	-5.48484	4.13836e-08	-0.767779	6.65184e-08	160
ASB8	4.50908	4.31978	0.189308	0.000707102	5.35155	8.72057e-08	0.438474	6.72127e-08	39
IL22RA1	3.15871	4.33956	-1.18085	2.52526e-06	-5.13683	2.79418e-07	-0.721855	6.7724e-08	60
HIRA	5.16535	5.37614	-0.210788	0.00910246	-5.32021	1.03648e-07	-0.723645	6.78371e-08	41
SOX18	4.39248	3.8894	0.503084	0.00164023	5.07831	3.80811e-07	0.855601	6.86206e-08	68
CDKN1B	5.37101	5.15866	0.212354	0.016279	5.24538	1.5596e-07	0.856626	6.86821e-08	119
GRIP1	0.334703	0.20074	0.133962	0.599364	5.42085	5.9318e-08	0.80932	6.91568e-08	60
ZDHHC19	-3.24483	-3.55522	0.31039	0.0396046	5.13485	2.82367e-07	0.880933	6.96212e-08	90
CHEK2	2.63103	3.16495	-0.533923	1.08902e-05	-5.5065	3.66029e-08	-0.647974	7.03105e-08	26
PRDM5	1.38033	0.523484	0.856843	0.000158498	5.41128	6.25774e-08	0.828844	7.13357e-08	41
OR2B6	-3.86732	-3.38009	-0.487224	0.0112693	-5.09692	3.45233e-07	-0.717885	7.1715e-08	46
SSTR3	-2.27799	-2.85258	0.574587	0.0124436	5.33677	9.46144e-08	0.741475	7.23764e-08	11
ZNF79	2.17403	1.9187	0.255325	0.000529042	5.16514	2.40256e-07	0.814586	7.31339e-08	88
ZC4H2	2.94291	2.60419	0.338717	0.0498579	5.14557	2.66713e-07	0.641452	7.31727e-08	89
PTCH1	5.10556	4.6631	0.442463	0.0103318	5.16684	2.38082e-07	0.828214	7.37012e-08	31
LMO1	-2.43347	-3.74261	1.30914	7.46986e-05	4.70636	2.52175e-06	0.798282	7.50928e-08	60
KDM4C	4.41426	4.48482	-0.0705605	0.441776	-5.33206	9.71052e-08	-0.87247	7.70938e-08	124
HRH2	0.619226	-0.368613	0.987839	2.52524e-07	5.48156	4.21588e-08	0.716187	7.72644e-08	34
RASGEF1C	-2.58875	-3.28138	0.692626	0.00728452	5.01169	5.39529e-07	0.665469	7.74923e-08	8
LCORL	3.66382	3.87383	-0.210007	0.0194242	-5.3511	8.74205e-08	-0.726296	7.75463e-08	79
PYGO1	2.464	1.59551	0.86849	0.000108475	5.2348	1.65164e-07	0.864396	7.75544e-08	12
GALR1	-3.01329	-3.92262	0.909332	2.09744e-05	4.76591	1.88001e-06	0.746585	7.86133e-08	18
SSX1	-4.53469	-3.8802	-0.654486	0.0286453	-6.25987	3.85307e-10	-0.825733	7.87842e-08	182
ZNF491	-0.407355	-1.11688	0.709521	8.68158e-07	5.1463	2.65673e-07	0.690182	7.90024e-08	28
SP5	1.04125	1.66522	-0.623975	0.0630445	-5.63493	1.75133e-08	-0.739111	7.93376e-08	92
RAPGEFL1	4.42777	5.49587	-1.0681	2.8768e-06	-5.03708	4.72686e-07	-0.804472	7.97148e-08	77
TCERG1	5.53555	5.68988	-0.154331	0.0228877	-5.29882	1.16553e-07	-0.80543	8.00278e-08	148
CD2AP	6.38745	6.98113	-0.59368	1.21268e-06	-4.95749	7.14097e-07	-0.687464	8.0829e-08	70
CD79A	4.40002	2.68039	1.71963	1.31913e-06	5.17932	2.22695e-07	0.796987	8.1386e-08	32
MYCBP	4.62042	4.92053	-0.30011	0.000469964	-5.28371	1.26594e-07	-0.746616	8.16907e-08	103
ZNF501	1.54417	1.08713	0.457038	0.000865978	5.08778	3.62285e-07	0.795204	8.22171e-08	56
TBC1D10C	2.87972	1.70304	1.17669	1.45348e-08	5.2274	1.71914e-07	0.852165	8.22351e-08	12
RAB6B	2.50838	2.05073	0.457648	0.018136	5.22667	1.72587e-07	0.750221	8.26705e-08	21
ANP32A	5.95455	6.07275	-0.118197	0.0904972	-5.26045	1.437e-07	-0.817088	8.36439e-08	29
RALGAPB	6.14505	6.49535	-0.350301	4.80822e-06	-5.61236	1.9959e-08	-0.798791	8.43186e-08	72
FYN	5.03324	4.61103	0.422212	0.00032875	5.13274	2.8556e-07	0.834545	8.4544e-08	13
MADCAM1	0.791262	-0.288095	1.07936	0.000169155	4.99552	5.86789e-07	0.739778	8.46406e-08	39
FZD8	3.99954	3.38492	0.614616	0.000911027	5.02678	4.98777e-07	0.893045	8.58267e-08	31
ZXDA	2.11709	1.71567	0.401423	0.00446045	5.22558	1.73607e-07	0.800823	8.58744e-08	57
FAM126A	4.20778	3.71949	0.488299	0.00203032	5.44743	5.11037e-08	0.773457	8.59121e-08	35
KLF15	0.638508	0.271068	0.36744	0.221402	5.30479	1.12802e-07	0.502383	8.59631e-08	93
RCAN2	4.32513	3.22125	1.10388	2.82536e-08	4.78807	1.68394e-06	0.741761	8.84536e-08	41
ELF5	-2.38474	-1.86005	-0.524687	0.200884	-5.57814	2.431e-08	-0.802916	8.85172e-08	98
POU5F1	0.499131	0.913341	-0.414211	0.06693	-5.01058	5.42672e-07	-0.815144	8.90982e-08	95
SGK2	2.45234	3.34554	-0.893202	0.00118504	-4.95305	7.3058e-07	-0.702969	8.94255e-08	85
ITGA6	7.42061	8.00398	-0.583372	4.04621e-05	-5.075	3.87498e-07	-0.748052	8.9565e-08	48
BAIAP2L1	6.02176	6.72391	-0.702145	6.39516e-06	-5.00407	5.61334e-07	-0.763223	8.96044e-08	25
HCRTR1	-3.57267	-4.07992	0.507249	0.000779664	5.14344	2.69749e-07	0.738963	9.01433e-08	151
NLK	4.06039	4.20016	-0.139765	0.0554176	-5.60044	2.13811e-08	-0.67303	9.10512e-08	58
HOXB9	2.31974	3.02967	-0.709927	0.0412185	-5.23975	1.60794e-07	-0.547349	9.11982e-08	55
GPR18	0.274192	-0.789139	1.06333	1.72313e-07	5.11068	3.20999e-07	0.919813	9.17116e-08	13
ZNF131	4.35587	4.57121	-0.215332	0.00771709	-5.60494	2.08322e-08	-0.756201	9.26537e-08	55
CSRNP3	1.39261	0.486767	0.905846	3.03738e-05	5.20115	1.98064e-07	0.835909	9.31286e-08	55
S1PR4	1.77248	0.648246	1.12423	4.84636e-08	5.09168	3.54912e-07	0.887097	9.37586e-08	23
ZNF331	3.49304	2.81325	0.67979	0.000331634	5.42884	5.67223e-08	0.672057	9.44448e-08	40
S100A10	8.26857	8.60739	-0.338819	0.0271243	-5.47796	4.30245e-08	-0.490832	9.47819e-08	50
DGKI	0.80159	-0.194284	0.995873	9.98843e-07	5.09597	3.46968e-07	0.720622	9.58055e-08	41
INPP5B	4.22041	3.75676	0.463645	4.22721e-08	5.14183	2.72071e-07	0.784753	9.67553e-08	89
FGD5	4.50471	3.9203	0.58441	7.60059e-05	5.22624	1.72993e-07	0.925561	9.71195e-08	29
HOXB7	3.50152	3.60473	-0.103203	0.632646	-5.36714	7.99944e-08	-0.82737	9.72058e-08	91
CHRM2	0.303765	-1.42826	1.73202	0.000208169	4.89174	9.99496e-07	0.762335	9.7287e-08	15
MORF4L2	6.94295	7.12197	-0.179016	0.0146301	-5.28643	1.24726e-07	-0.771307	9.77936e-08	175
SORCS2	2.16746	1.00612	1.16134	4.12051e-07	5.314	1.07247e-07	0.86637	9.78023e-08	15
CASP10	4.82259	5.073	-0.250406	0.0847857	-5.37731	7.56062e-08	-0.688428	9.82961e-08	52
CNR2	0.108004	-1.63903	1.74703	5.15234e-08	5.00956	5.45536e-07	0.930298	9.92099e-08	28
SGSM2	5.07126	4.88024	0.191015	0.0637477	4.96155	6.99316e-07	0.654702	1.00186e-07	54
FARP2	5.72635	6.05511	-0.328754	0.000192186	-5.02038	5.15689e-07	-0.838591	1.00607e-07	71
GRIK2	-1.60986	-2.4742	0.864336	0.00016013	4.95014	7.41592e-07	0.711708	1.01247e-07	46
ZNF732	-2.7511	-3.15681	0.405711	0.0247819	5.14269	2.70838e-07	0.806284	1.01706e-07	70
PTTG1	4.00985	4.614	-0.604154	9.49987e-05	-5.24563	1.55745e-07	-0.596513	1.03341e-07	192
CCDC47	6.40349	6.67948	-0.275986	0.0017886	-5.20245	1.96674e-07	-0.819759	1.03364e-07	56
PWP2	1.70531	2.05255	-0.347243	0.2282	-5.25276	1.49834e-07	-0.753917	1.03824e-07	29
MAP3K14	4.80047	4.34384	0.456623	4.80636e-05	5.13491	2.82286e-07	0.721998	1.04071e-07	50
RGS11	0.736936	0.351474	0.385462	0.124981	5.51243	3.5392e-08	0.636687	1.05883e-07	20
THEMIS	1.49247	0.499168	0.993307	2.35476e-05	5.2238	1.75285e-07	0.917037	1.07144e-07	22
EAF1	4.72788	5.11623	-0.388359	7.39255e-07	-5.18761	2.1301e-07	-0.699131	1.07185e-07	117
IL2	-3.81652	-4.1865	0.369977	0.00479421	5.07021	3.97374e-07	0.892388	1.07838e-07	151
CIITA	5.59187	4.74263	0.849233	0.000210095	5.26211	1.42411e-07	0.832346	1.07975e-07	402
NRAS	5.7304	5.96971	-0.239311	0.00603827	-5.03239	4.84398e-07	-0.586025	1.10823e-07	39
NLE1	3.86421	4.28103	-0.416822	2.92506e-05	-5.34241	9.17195e-08	-0.791679	1.10836e-07	99
GRK4	1.33973	0.962806	0.376921	6.19074e-05	5.42883	5.67246e-08	0.68215	1.12481e-07	43
CHD9	5.71795	5.367	0.35095	6.01904e-05	5.25524	1.47834e-07	0.850067	1.12513e-07	169
SGPL1	5.96263	6.20706	-0.244431	0.00631834	-4.9795	6.37475e-07	-0.492031	1.12837e-07	63
PLXNA3	5.30935	5.75731	-0.44796	7.42517e-05	-5.26346	1.4137e-07	-0.748044	1.13307e-07	72
RHOV	0.388182	1.73132	-1.34314	3.61435e-06	-5.16061	2.46148e-07	-0.756732	1.14754e-07	75
TBX4	-3.30214	-2.28646	-1.01568	0.00123167	-5.72117	1.05791e-08	-0.811611	1.14984e-07	92
ZNF441	2.32934	1.98623	0.343109	0.00218036	5.22364	1.75444e-07	0.829539	1.17397e-07	90
BCL6B	3.40248	2.83378	0.568695	7.44626e-05	5.12081	3.04225e-07	0.855635	1.17593e-07	83
ADIPOR2	5.76546	5.95196	-0.186502	0.0286156	-5.02566	5.017e-07	-0.78913	1.18653e-07	54
SELE	2.07	1.70945	0.360547	0.164139	5.21952	1.79383e-07	0.725835	1.1886e-07	30
NFKBIZ	4.67061	5.08692	-0.416314	0.00968722	-5.07556	3.86347e-07	-0.831426	1.22372e-07	130
CANT1	6.59316	6.93981	-0.346641	0.00206009	-5.38803	7.12356e-08	-0.792257	1.22765e-07	60
ZNF569	1.24577	0.440194	0.805581	2.38068e-05	4.73043	2.24048e-06	0.763895	1.22803e-07	17
LBX2	-0.794442	-0.0392781	-0.755164	3.75864e-06	-5.23634	1.63789e-07	-0.689509	1.23409e-07	113
OVOL2	2.77114	3.42761	-0.656474	0.000219252	-5.05185	4.37545e-07	-0.737277	1.24013e-07	157
NR3C2	3.62311	3.21957	0.403538	0.0325162	5.07183	3.94013e-07	0.658329	1.25101e-07	122
ITGA5	7.25114	6.36331	0.887835	9.92515e-08	4.85931	1.17797e-06	0.718273	1.25146e-07	22
SOX8	0.661016	0.451857	0.209159	0.49675	5.16241	2.43788e-07	0.818422	1.25657e-07	54
ZBTB20	3.43112	2.58202	0.849104	4.01311e-07	5.01517	5.29867e-07	0.841888	1.26617e-07	55
LHB	-3.46812	-3.17111	-0.297006	0.0534583	-5.25203	1.50428e-07	-0.687455	1.2752e-07	43
NPHP4	3.45435	3.90759	-0.453235	4.66061e-05	-5.2064	1.92541e-07	-0.738654	1.28554e-07	86
RALA	5.49982	5.74562	-0.245796	0.0015355	-5.22323	1.75826e-07	-0.676964	1.31996e-07	73
TLR1	3.01803	1.82879	1.18924	1.40908e-09	5.11961	3.0617e-07	0.865349	1.33289e-07	41
CALCRL	4.81089	4.17459	0.636301	4.42132e-05	4.85244	1.21953e-06	0.767664	1.33511e-07	22
ASCL2	2.61727	3.58849	-0.971218	0.00803402	-5.31929	1.0417e-07	-0.7545	1.34308e-07	115
ZNF846	1.60476	1.29281	0.311954	0.00142704	5.21254	1.86268e-07	0.759512	1.34591e-07	47
OPN4	-3.81432	-4.20474	0.390425	0.00599081	5.32566	1.00587e-07	0.748832	1.34692e-07	28
ZFP28	1.09589	0.181792	0.914093	1.28278e-05	5.11241	3.1808e-07	0.8196	1.34698e-07	32
PPP1R2	5.76121	5.72261	0.0386004	0.593762	5.12795	2.92918e-07	0.754124	1.353e-07	35
DNMBP	5.47467	5.76208	-0.287402	0.00178495	-5.03975	4.6613e-07	-0.822312	1.35727e-07	76
ZNF606	2.20165	1.93879	0.26286	0.270336	4.991	6.00691e-07	0.840299	1.35728e-07	33
ZNF549	1.75671	1.34858	0.40813	0.04282	5.25762	1.4593e-07	0.757529	1.36785e-07	16
PBXIP1	6.41925	5.9405	0.478754	6.13196e-05	5.21824	1.8063e-07	0.620211	1.3723e-07	295
UNC5CL	3.46081	4.40565	-0.94484	0.000487862	-5.02108	5.13826e-07	-0.744083	1.37994e-07	82
AHCTF1	5.79386	6.22202	-0.428157	2.94554e-07	-5.19416	2.05647e-07	-0.74733	1.41272e-07	114
RAB25	5.87292	6.68717	-0.814251	2.32525e-08	-5.16488	2.40599e-07	-0.799837	1.41398e-07	170
ZNF670	1.35039	1.7569	-0.406511	4.90824e-05	-5.04866	4.44919e-07	-0.642202	1.42716e-07	50
PCNA	6.34189	6.88488	-0.542992	2.89435e-05	-5.02672	4.98949e-07	-0.687025	1.4318e-07	42
ZBTB46	3.1356	2.80664	0.32896	0.0133793	5.02804	4.95507e-07	0.90262	1.43208e-07	79
ZBED3	4.76151	4.60351	0.158004	0.135316	5.15642	2.51716e-07	0.848196	1.43576e-07	120
PHOX2B	-3.44608	-4.2	0.753919	0.00101877	4.80526	1.5455e-06	0.718558	1.44712e-07	83
SLC7A1	6.57351	6.98855	-0.415042	0.000527864	-5.03278	4.8343e-07	-0.547683	1.45234e-07	36
IRS1	5.74423	5.20754	0.536693	0.000302826	4.88125	1.05417e-06	0.776651	1.45252e-07	28
KAT6B	5.49023	5.17654	0.313694	0.00535907	5.04465	4.54348e-07	0.680066	1.4545e-07	118
RPS6KA6	-0.338599	-1.10405	0.765455	0.0120597	5.1036	3.33257e-07	0.652729	1.45792e-07	53
KLF17	-2.13569	-3.27947	1.14378	8.48487e-07	5.02824	4.94996e-07	0.867807	1.46453e-07	23
ASB1	4.09014	3.88265	0.207485	0.00683423	4.97978	6.36554e-07	0.716778	1.46486e-07	26
RET	1.358	0.337744	1.02025	0.000976683	5.03938	4.6704e-07	0.764992	1.46666e-07	31
ZNF239	2.09835	2.36592	-0.267566	0.0452885	-5.14875	2.62228e-07	-0.677025	1.47474e-07	60
RANGAP1	6.01175	6.45454	-0.442789	6.04616e-07	-5.09913	3.4122e-07	-0.749786	1.49472e-07	97
GPR160	5.01876	5.50387	-0.485112	0.00707817	-5.04222	4.60161e-07	-0.743463	1.49635e-07	71
CARD10	4.84097	5.44538	-0.604417	2.47775e-06	-5.09386	3.50853e-07	-0.768607	1.5029e-07	61
PKN3	3.71479	3.87997	-0.165178	0.236383	-5.10744	3.26561e-07	-0.804636	1.51036e-07	59
DGKG	1.89551	0.864662	1.03085	4.56859e-06	5.17587	2.2685e-07	0.697267	1.51821e-07	18
CDKN2C	3.53746	3.27399	0.263472	0.0269528	5.55241	2.81755e-08	0.822295	1.51982e-07	47
BNIP3	3.4012	3.1806	0.220598	0.289917	5.15795	2.49664e-07	0.617729	1.53065e-07	28
DBX2	-3.8834	-4.49471	0.611307	1.93148e-05	4.9422	7.72463e-07	0.831439	1.53192e-07	61
HTATIP2	5.01454	5.44865	-0.434113	1.78481e-05	-5.00408	5.61288e-07	-0.765947	1.54098e-07	158
GPRC5A	8.02371	8.82997	-0.806256	0.000758213	-5.01231	5.37807e-07	-0.603648	1.55145e-07	105
PHLDA3	4.98924	4.25032	0.738924	0.00038093	4.98129	6.31612e-07	0.811349	1.5594e-07	38
SCG5	1.61957	0.649735	0.969837	1.3381e-05	5.38432	7.27187e-08	0.80319	1.56155e-07	18
EPAS1	7.7327	7.36762	0.365081	0.000104213	4.95664	7.17239e-07	0.764341	1.56294e-07	61
CLP1	2.90358	3.04307	-0.139491	0.0502953	-5.36992	7.87737e-08	-0.775244	1.571e-07	89
MAP2K1	5.33272	5.34438	-0.0116571	0.8552	-5.1387	2.76652e-07	-0.678021	1.57796e-07	39
F2RL3	2.90794	2.55798	0.349961	0.0583466	5.13783	2.77929e-07	0.848362	1.58706e-07	35
SHC2	3.27937	2.96714	0.312233	0.122053	5.12512	2.97353e-07	0.674302	1.59018e-07	14
HABP4	3.36855	3.02595	0.342598	0.00212665	4.85575	1.19929e-06	0.742469	1.61795e-07	114
ARL5B	5.27229	5.73915	-0.466861	4.09213e-05	-5.14171	2.72245e-07	-0.671587	1.62269e-07	80
TCF3	6.13354	6.45255	-0.319007	0.00282943	-5.01838	5.21099e-07	-0.736074	1.6396e-07	92
GRIK1	-3.04114	-3.45312	0.411973	0.0279818	4.96904	6.72853e-07	0.75959	1.65559e-07	69
NOTCH2	7.21231	6.61685	0.595454	5.56587e-08	5.36107	8.2729e-08	0.69144	1.66709e-07	79
C1QBP	6.06821	6.47762	-0.409409	0.000294567	-5.33513	9.54768e-08	-0.755397	1.6735e-07	265
MYBBP1A	5.47474	5.88622	-0.411479	8.97868e-05	-5.08488	3.67852e-07	-0.737657	1.67513e-07	87
DNM2	7.51008	7.78018	-0.270107	0.00342318	-4.88596	1.02925e-06	-0.792692	1.68772e-07	49
ZNF622	4.02464	4.24221	-0.217563	0.00952122	-5.11702	3.10406e-07	-0.833349	1.69614e-07	65
PPFIA1	5.74822	5.99989	-0.251668	0.00167541	-5.24666	1.54882e-07	-0.556993	1.70453e-07	19
XRN2	6.27209	6.63685	-0.364751	1.19667e-05	-5.22188	1.77115e-07	-0.637978	1.72475e-07	187
ITK	2.90363	1.8001	1.10354	1.34813e-06	5.15054	2.5974e-07	0.900137	1.72653e-07	10
SPI1	4.84655	3.9159	0.930647	2.99666e-07	5.25971	1.44285e-07	0.793885	1.75753e-07	190
SCRIB	6.43135	6.96412	-0.532775	6.48955e-06	-5.13719	2.78875e-07	-0.774531	1.76192e-07	100
ASAP3	3.47525	3.06228	0.412968	0.0137483	4.96547	6.85338e-07	0.615771	1.80105e-07	33
APC	5.3496	5.01066	0.338937	0.000364004	5.26864	1.37435e-07	0.816421	1.81042e-07	57
HOXC10	1.257	1.89874	-0.641739	0.211535	-5.27	1.36427e-07	-0.571484	1.8161e-07	73
ASCC3	5.66312	5.97448	-0.311365	0.00287965	-5.20254	1.96586e-07	-0.647632	1.82975e-07	186
PDE1C	2.07188	1.07598	0.995892	4.33719e-06	4.79199	1.65132e-06	0.728846	1.83494e-07	33
TRAF2	4.02884	4.30858	-0.279738	0.00203129	-5.14012	2.74559e-07	-0.628795	1.86781e-07	55
NCK1	4.60974	4.45358	0.15615	0.0456531	5.03549	4.76635e-07	0.618322	1.87243e-07	56
ADAM11	-1.51199	-1.60019	0.0882012	0.628422	4.97263	6.60497e-07	0.672848	1.87674e-07	36
NEDD4	4.07396	3.95316	0.120802	0.308674	4.9178	8.75245e-07	0.723478	1.88885e-07	44
E2F5	3.10134	3.46951	-0.368169	0.00258511	-5.2746	1.33044e-07	-0.735191	1.90703e-07	65
ZNF552	2.66749	2.78719	-0.119702	0.220735	-5.1081	3.25408e-07	-0.706918	1.91796e-07	114
GABRA5	-3.16191	-3.86338	0.701471	0.0075496	4.92306	8.5202e-07	0.721569	1.92296e-07	21
ZC3H15	5.38891	5.74383	-0.354916	0.0001219	-5.31503	1.06642e-07	-0.733145	1.93588e-07	119
RREB1	6.34106	6.56893	-0.227869	0.00246927	-5.20501	1.93991e-07	-0.7372	1.94512e-07	131
TULP3	4.70232	4.57445	0.127868	0.0745986	5.28626	1.24846e-07	0.665949	1.95455e-07	44
RAB30	4.24022	3.59215	0.648068	8.26665e-07	5.32839	9.90875e-08	0.750466	1.96245e-07	52
CD14	5.73837	5.02335	0.715029	2.20083e-05	5.25287	1.49746e-07	0.793223	1.97021e-07	26
ZNF557	3.01591	2.74651	0.269405	0.00203163	4.91305	8.96717e-07	0.898841	1.98993e-07	113
MLX	5.58865	5.79108	-0.202431	0.0117817	-5.02791	4.95866e-07	-0.785556	2.00044e-07	79
IGSF1	-0.792381	-1.24317	0.450787	0.161291	5.02357	5.0721e-07	0.780984	2.01905e-07	142
HOXA13	2.50299	3.2614	-0.758407	0.0791179	-5.18422	2.16925e-07	-0.503018	2.02503e-07	113
FGF1	0.641929	-0.0763866	0.718316	8.54757e-06	4.72626	2.28696e-06	0.719448	2.04285e-07	18
ZNF572	0.346533	0.608788	-0.262256	0.15002	-5.1117	3.19276e-07	-0.768633	2.04295e-07	46
STAT4	1.82479	1.11453	0.710254	2.79201e-05	5.08047	3.76495e-07	0.850405	2.05268e-07	106
IFNLR1	2.18416	2.47624	-0.292083	0.176523	-5.72964	1.00644e-08	-0.866486	2.05389e-07	58
G3BP1	7.11826	7.28598	-0.167718	0.0160446	-5.13879	2.76518e-07	-0.639515	2.05544e-07	87
CASKIN1	-1.74708	-1.57369	-0.173396	0.485899	-5.1118	3.19111e-07	-0.824394	2.05866e-07	60
TNFRSF11A	4.376	4.77392	-0.397922	0.084759	-4.91933	8.68415e-07	-0.680018	2.06348e-07	65
STAT3	7.93575	7.71945	0.216305	0.00653428	5.01404	5.32993e-07	0.749061	2.08068e-07	75
ZMIZ2	6.73338	6.99704	-0.263653	0.000708137	-5.25765	1.45905e-07	-0.721823	2.08221e-07	102
ZNF354C	1.43136	0.457614	0.97375	1.08856e-06	5.08594	3.65811e-07	0.807732	2.0851e-07	67
PDE6G	-0.856688	-1.59039	0.733698	4.88218e-05	5.19359	2.06281e-07	0.763666	2.09135e-07	7
TMPRSS2	5.58918	6.63369	-1.04451	8.00463e-06	-4.7734	1.81144e-06	-0.704772	2.10912e-07	68
EZH2	3.7228	4.3721	-0.649299	1.60801e-06	-5.23342	1.66399e-07	-0.66342	2.11003e-07	53
ZNF687	5.4511	5.68086	-0.229761	0.00271051	-5.30843	1.10572e-07	-0.766197	2.12862e-07	104
ARL4C	5.20664	4.5608	0.645839	6.94885e-05	5.13663	2.79705e-07	0.725227	2.1368e-07	39
EBF4	3.09795	2.48108	0.616869	0.0040273	4.89753	9.70469e-07	0.759966	2.14476e-07	80
MC4R	-4.33573	-4.43059	0.0948647	0.458798	4.91075	9.07275e-07	0.652394	2.148e-07	34
ZNF300	1.31599	0.948844	0.367147	0.13565	5.25327	1.49419e-07	0.767937	2.15102e-07	43
RAC2	5.8045	5.13097	0.673527	4.45143e-05	4.92415	8.47288e-07	0.786943	2.1533e-07	20
SPIB	2.66361	1.18312	1.4805	0.000128839	5.0083	5.49129e-07	0.865404	2.15383e-07	64
ITSN1	5.04402	4.91173	0.132295	0.142796	4.72217	2.3334e-06	0.7749	2.15489e-07	58
SET	7.67193	7.95226	-0.280338	0.000336909	-5.15164	2.58225e-07	-0.82802	2.17552e-07	24
HDAC8	3.3572	3.43757	-0.0803651	0.231069	-5.24049	1.60149e-07	-0.72746	2.21883e-07	142
NTRK2	2.33955	1.44165	0.897904	0.00589391	4.83986	1.2993e-06	0.761423	2.24432e-07	31
PAX8	2.44543	2.84911	-0.403675	0.0460579	-5.12567	2.96484e-07	-0.772585	2.2462e-07	45
ZNF335	4.75117	5.02619	-0.275026	5.26385e-05	-5.22631	1.72925e-07	-0.764294	2.29312e-07	120
CSDE1	8.46955	8.26495	0.204604	0.00362277	4.80472	1.5497e-06	0.73596	2.3212e-07	85
GPR132	2.48656	1.74549	0.741069	3.72501e-05	4.91925	8.68759e-07	0.831779	2.32406e-07	18
RIPPLY1	-4.36844	-3.81703	-0.551409	0.00073014	-5.52136	3.36381e-08	-0.677642	2.33721e-07	152
AGPAT2	6.14422	6.74107	-0.596849	2.55094e-05	-5.08747	3.62874e-07	-0.754138	2.34231e-07	85
RASSF4	4.52625	4.12127	0.404986	0.00401661	4.9343	8.04374e-07	0.742445	2.3435e-07	16
C3AR1	3.83873	2.81181	1.02692	3.33166e-07	5.35213	8.69247e-08	0.708989	2.34706e-07	37
ZNF568	1.28358	0.541602	0.741978	9.29381e-05	4.97676	6.46581e-07	0.724641	2.3485e-07	41
DZIP3	3.58076	3.47066	0.110104	0.307585	4.95785	7.1276e-07	0.834777	2.36079e-07	85
FAS	4.30967	3.43113	0.878536	2.89524e-07	5.27244	1.34622e-07	0.807376	2.39016e-07	66
TBC1D7	3.18071	3.55162	-0.370914	8.00187e-05	-5.37709	7.57005e-08	-0.725668	2.39517e-07	31
GPR26	-3.3708	-4.30656	0.935765	5.70223e-07	4.87277	1.10043e-06	0.714789	2.40592e-07	15
SPOCK1	4.51451	2.83752	1.67698	4.01051e-07	5.17958	2.22389e-07	0.671998	2.41389e-07	53
SPRY4	4.80831	5.31533	-0.507023	3.17091e-05	-4.97908	6.38888e-07	-0.610033	2.42718e-07	59
TRIM25	5.72099	6.00672	-0.285733	0.00354427	-5.13421	2.8333e-07	-0.754231	2.48336e-07	97
YWHAB	8.43347	8.77347	-0.339996	9.06787e-06	-5.47703	4.32518e-08	-0.565544	2.49549e-07	55
RPN1	7.83701	8.17373	-0.336719	1.6419e-05	-5.0215	5.12697e-07	-0.680202	2.5096e-07	63
IRAK1	6.78977	7.0752	-0.285429	0.00700116	-4.88363	1.04148e-06	-0.631721	2.55368e-07	98
CDS1	4.40673	5.15011	-0.743386	9.45382e-06	-4.83444	1.33522e-06	-0.7317	2.56429e-07	63
FCRL2	0.495772	-1.18551	1.68128	2.79878e-07	4.51454	6.34546e-06	0.877765	2.5858e-07	9
MAPK11	1.91825	1.42434	0.49391	0.000562373	5.07398	3.89572e-07	0.800366	2.58775e-07	19
CCR5	2.90581	1.83986	1.06594	2.17855e-07	4.93434	8.0423e-07	0.893325	2.59032e-07	13
CCL15	1.55361	2.07892	-0.525313	0.107541	4.83698	1.3183e-06	0.675834	2.61113e-07	69
HMGN1	6.73011	7.0282	-0.298091	0.000556613	-5.23438	1.65535e-07	-0.763864	2.61644e-07	47
DTX4	5.52913	5.98015	-0.451013	0.000441071	-4.98266	6.27153e-07	-0.6423	2.65648e-07	64
ARID5B	6.2285	5.80619	0.422304	0.000461745	5.09318	3.52102e-07	0.800928	2.6619e-07	51
APLNR	5.32889	4.54036	0.788537	2.96821e-05	5.01175	5.39361e-07	0.708366	2.69175e-07	23
CCL16	-3.4447	-4.00536	0.560656	0.00017858	4.87265	1.10109e-06	0.714262	2.71614e-07	74
PRDM13	-4.55061	-4.01816	-0.532444	0.0216212	-6.0114	1.83929e-09	-0.869842	2.74323e-07	43
VAX2	-2.38666	-2.26322	-0.123442	0.630705	4.85587	1.1986e-06	0.798362	2.75023e-07	50
TFDP2	5.72163	5.41226	0.309377	0.00393205	4.86955	1.11851e-06	0.742715	2.75634e-07	73
TAS2R38	-3.37854	-2.98075	-0.397787	0.0658294	-5.0666	4.04986e-07	-0.645642	2.75877e-07	65
ZNF793	1.52314	0.587846	0.935298	0.000318085	4.93359	8.07331e-07	0.770645	2.7787e-07	38
ZMIZ1	7.35515	7.02561	0.329534	0.000389126	4.97109	6.65777e-07	0.798663	2.79207e-07	90
CHEK1	3.67833	4.20952	-0.531193	9.88808e-06	-5.31072	1.0919e-07	-0.561275	2.80271e-07	50
EPHB6	2.20848	1.58503	0.623456	0.0121126	5.02654	4.9941e-07	0.697121	2.80536e-07	42
IGFBP6	3.60578	2.6342	0.971577	3.68998e-07	5.04607	4.50988e-07	0.760569	2.8203e-07	33
ZNF483	0.39756	-0.348043	0.745603	0.00013321	4.88136	1.05357e-06	0.725903	2.82869e-07	57
HCAR2	-0.611452	-0.266803	-0.344649	0.295687	-4.8286	1.37499e-06	-0.704131	2.85557e-07	63
RASIP1	3.49793	2.88218	0.615746	1.15221e-05	4.92676	8.36028e-07	0.810559	2.86311e-07	50
CRTC3	6.04649	5.56248	0.484005	3.2032e-08	5.05606	4.28009e-07	0.755181	2.87812e-07	92
PAX6	1.36086	1.15029	0.210571	0.222201	5.06365	4.11313e-07	0.630214	2.87827e-07	118
CD2	3.90481	2.99362	0.911192	6.60414e-06	5.1509	2.59233e-07	0.811912	2.88836e-07	9
ZNF532	5.64201	5.02481	0.617195	9.96687e-06	4.85449	1.20698e-06	0.682687	2.92886e-07	182
TLR5	2.34844	1.86665	0.481794	0.00196088	5.0881	3.61662e-07	0.75146	2.94583e-07	54
HIF3A	2.36131	1.34008	1.02123	0.00376311	4.62355	3.77221e-06	0.715885	2.95603e-07	90
AXIN1	5.1407	5.32271	-0.182012	0.0693506	-4.97735	6.44608e-07	-0.717651	2.9579e-07	50
EWSR1	7.45505	7.56269	-0.107636	0.0593953	-4.9775	6.44097e-07	-0.807723	2.98308e-07	103
TBX21	0.0954629	-0.72454	0.820003	2.94307e-05	5.06612	4.06011e-07	0.810738	3.03278e-07	175
PAQR8	5.16962	5.70038	-0.530757	0.00220443	-4.84147	1.28884e-06	-0.674744	3.06182e-07	87
CD74	11.1967	10.3851	0.811598	6.86785e-05	5.17427	2.28808e-07	0.763228	3.06671e-07	31
ZNF229	0.415811	-0.364235	0.780046	0.00410288	5.05474	4.3097e-07	0.700519	3.10964e-07	23
DTX2	5.21963	5.61888	-0.399252	0.000523219	-5.07845	3.80534e-07	-0.734662	3.19904e-07	57
CHRNA4	-3.75293	-3.9194	0.166465	0.483251	4.94	7.81225e-07	0.67058	3.22291e-07	50
ZNF554	1.71781	1.55404	0.163766	0.0809498	4.96387	6.91028e-07	0.57311	3.32822e-07	60
GPR1	-1.16014	-2.10882	0.948675	0.000169716	5.29573	1.18543e-07	0.730603	3.34808e-07	41
DDX1	6.10235	6.28917	-0.186816	0.0231709	-5.04409	4.55694e-07	-0.770305	3.375e-07	173
TFB1M	2.84632	3.06978	-0.223461	0.00589504	-5.0665	4.05201e-07	-0.79273	3.41509e-07	52
MKNK1	4.55599	4.47431	0.081685	0.112817	5.08754	3.62747e-07	0.81681	3.43863e-07	39
TAF2	5.21829	5.43854	-0.220254	0.00561053	-5.19237	2.07629e-07	-0.618161	3.49064e-07	74
RAB39A	-0.852892	-1.31468	0.461789	0.0265762	4.97527	6.51575e-07	0.794174	3.49583e-07	24
ZNF513	3.43713	3.58703	-0.149904	0.0956067	-5.09482	3.49078e-07	-0.695432	3.51755e-07	85
CD44	8.5674	7.96379	0.603604	0.000240975	5.43165	5.58347e-08	0.693993	3.5571e-07	31
SND1	7.18137	7.51824	-0.336875	3.65715e-05	-4.99248	5.96087e-07	-0.790613	3.58235e-07	142
FOXF2	3.58643	3.00603	0.580398	0.00941699	4.97025	6.68681e-07	0.677852	3.59028e-07	67
HIC2	2.9271	3.28979	-0.362687	0.0142537	-5.21057	1.88264e-07	-0.770883	3.60475e-07	87
HOXA2	0.680014	0.101435	0.578579	0.00988897	4.84349	1.27578e-06	0.719049	3.64107e-07	36
SERGEF	3.01522	2.87804	0.137188	0.0532203	5.06513	4.0813e-07	0.586021	3.64404e-07	55
ZDHHC16	4.40836	4.57321	-0.164846	0.0236992	-5.01964	5.17673e-07	-0.761673	3.66187e-07	34
TBL1X	4.88357	4.51593	0.367633	0.0178506	4.77419	1.80433e-06	0.639256	3.66438e-07	60
ULK2	3.72954	2.99572	0.733823	5.74097e-07	4.8678	1.12847e-06	0.777337	3.67647e-07	36
TCF15	-1.54375	-2.0372	0.493452	0.010806	4.83945	1.30198e-06	0.782325	3.7529e-07	32
FGD1	3.12709	2.50577	0.621319	1.7059e-05	4.80883	1.51813e-06	0.791656	3.75656e-07	54
HLX	2.61761	2.05607	0.561536	3.09738e-05	4.74079	2.12882e-06	0.836367	3.83008e-07	65
CARTPT	-1.61261	-3.51743	1.90482	2.84866e-06	4.56566	4.97921e-06	0.729908	3.83289e-07	15
TNFRSF25	2.65999	3.19981	-0.539818	0.00110458	-5.14693	2.64785e-07	-0.676352	3.84808e-07	103
PDGFRB	7.40816	6.65904	0.749114	2.7068e-06	4.8125	1.49054e-06	0.642176	3.85235e-07	73
ZDBF2	2.44515	1.72709	0.718061	0.00229885	5.04782	4.46881e-07	0.783701	3.87142e-07	72
SOX13	4.57207	4.98902	-0.416954	0.00310192	-5.08161	3.74254e-07	-0.795621	3.88143e-07	90
HDAC6	4.95596	5.0507	-0.0947382	0.231459	-4.94651	7.5556e-07	-0.760065	3.92687e-07	83
DTX3	3.65002	2.87151	0.77851	6.94622e-05	4.84295	1.27928e-06	0.716457	3.94137e-07	50
CHL1	2.37051	1.22852	1.14198	1.80587e-05	4.88924	1.01226e-06	0.686978	3.95954e-07	14
AHRR	0.632345	0.857963	-0.225618	0.247056	-5.04454	4.54622e-07	-0.753172	3.97696e-07	67
ESRRA	4.89226	5.45452	-0.562258	7.86441e-07	-5.06475	4.08933e-07	-0.789773	3.97907e-07	143
GPHN	3.6537	4.08906	-0.43536	0.00012663	-4.9501	7.41744e-07	-0.739128	4.05333e-07	28
XCR1	0.685943	-0.457744	1.14369	0.000125916	5.03659	4.73887e-07	0.746942	4.07244e-07	13
NOC2L	5.80474	6.30812	-0.503384	1.14188e-06	-5.02696	4.98304e-07	-0.792436	4.11775e-07	178
PHOX2A	-3.37548	-4.35957	0.984091	6.9186e-06	4.60146	4.19542e-06	0.676477	4.25291e-07	65
VGLL4	6.11481	6.08183	0.0329776	0.674964	4.94097	7.7735e-07	0.671641	4.25507e-07	164
DNER	-0.962836	-1.57905	0.616215	0.0962493	4.78052	1.74846e-06	0.667375	4.2588e-07	47
TNFRSF10D	2.9004	3.17658	-0.276174	0.0950433	-4.82357	1.41014e-06	-0.82189	4.26071e-07	52
ADCY4	3.34386	2.69332	0.650543	8.34097e-07	5.14608	2.65993e-07	0.777809	4.28249e-07	33
ACAD8	3.61047	3.70015	-0.0896755	0.206164	-5.06734	4.03415e-07	-0.619311	4.29003e-07	164
HDAC4	4.87759	4.4926	0.384994	0.00187607	4.80799	1.52457e-06	0.713461	4.29283e-07	153
HAT1	4.91847	5.15203	-0.233557	0.000614044	-5.13481	2.82426e-07	-0.6426	4.31452e-07	160
TP73	1.40214	1.69707	-0.294925	0.213203	-4.89816	9.67394e-07	-0.620197	4.31811e-07	65
RRAS	5.91933	5.32504	0.594291	4.66035e-05	4.93087	8.18647e-07	0.695633	4.33026e-07	82
SCG2	1.49456	0.0704668	1.4241	1.83715e-06	4.99125	5.99883e-07	0.734976	4.41489e-07	16
CACNB4	0.158704	-0.364392	0.523096	0.0177281	4.99167	5.98609e-07	0.741108	4.42129e-07	33
TCF20	5.9413	6.22603	-0.28473	0.00108796	-4.95833	7.11019e-07	-0.663315	4.42309e-07	128
F2R	6.28626	5.68073	0.605531	6.32205e-06	4.68904	2.74484e-06	0.612638	4.49036e-07	42
PNN	5.84712	6.14213	-0.295009	0.000202712	-4.9976	5.80476e-07	-0.808174	4.49649e-07	171
TBC1D32	1.76603	2.02777	-0.261743	0.0297552	-5.08231	3.72874e-07	-0.781483	4.5272e-07	37
ZNF280D	4.82922	4.59144	0.237782	0.00115106	4.78414	1.71719e-06	0.683733	4.58607e-07	109
ZHX3	5.09344	4.83489	0.258545	0.00924696	4.73291	2.21325e-06	0.692283	4.59497e-07	75
RAPGEF3	3.37057	2.83365	0.536919	3.08867e-05	5.24048	1.60163e-07	0.620641	4.60263e-07	53
CD3E	4.30417	3.44479	0.859373	3.0582e-05	5.00525	5.57884e-07	0.759985	4.61567e-07	14
TGS1	4.53098	4.7615	-0.230527	0.0101329	-5.08076	3.75935e-07	-0.570504	4.61689e-07	91
TRAK2	5.54452	5.23451	0.310015	6.26995e-05	4.85307	1.21563e-06	0.760108	4.63376e-07	207
IL5	-3.75115	-4.10145	0.350297	0.0126946	4.77997	1.75319e-06	0.798715	4.66523e-07	107
BAK1	5.09839	5.42477	-0.326377	0.00331608	-5.02351	5.07357e-07	-0.760716	4.70767e-07	102
ZNF658	1.65769	1.24589	0.411809	0.00187325	4.80564	1.54258e-06	0.6343	4.70953e-07	56
STK36	3.90721	4.24918	-0.341971	0.000281529	-5.09391	3.50761e-07	-0.658251	4.72688e-07	167
ATP8B1	6.42508	6.94532	-0.520244	0.00071755	-4.80317	1.56173e-06	-0.765968	4.793e-07	251
SIT1	1.90929	0.616027	1.29327	2.77063e-08	4.87248	1.10207e-06	0.798498	4.83422e-07	17
KEL	-1.45934	-1.87483	0.415487	0.106056	4.62294	3.78342e-06	0.752024	4.88247e-07	28
PALB2	3.77548	4.02408	-0.248601	0.00219372	-5.09794	3.43375e-07	-0.590311	4.90029e-07	49
ZNF442	0.24514	-0.0678223	0.312962	0.019507	4.85965	1.17594e-06	0.704899	4.90413e-07	29
TGM2	8.10439	7.67906	0.425324	0.0329406	4.80385	1.55641e-06	0.792309	4.92305e-07	55
CEBPD	6.50817	6.17813	0.330044	0.0188574	5.02686	4.98567e-07	0.647479	4.94549e-07	71
MYLK2	-2.505	-2.18501	-0.319995	0.0300996	-4.98025	6.35014e-07	-0.547551	4.94619e-07	49
ARFIP2	5.01752	5.36037	-0.342853	1.87243e-05	-4.8679	1.12788e-06	-0.763675	5.02167e-07	120
RAD21	7.29254	7.70643	-0.413887	2.56388e-06	-4.99719	5.81705e-07	-0.69714	5.02826e-07	64
RAB34	4.78165	4.21706	0.564593	0.007688	5.00228	5.66557e-07	0.83017	5.06288e-07	16
STMN2	0.363189	-1.64041	2.0036	7.2606e-10	4.7312	2.23191e-06	0.7059	5.12878e-07	21
ZNF559	2.73889	2.10984	0.629049	0.000242278	4.86625	1.13735e-06	0.748604	5.15417e-07	28
ITGB5	6.47213	6.4104	0.0617308	0.559433	4.82744	1.38301e-06	0.668239	5.1803e-07	51
FOSL1	3.29288	3.9263	-0.633413	0.00631573	-4.76024	1.93363e-06	-0.67018	5.20485e-07	140
RUVBL2	5.77735	6.18628	-0.408929	0.000141916	-5.02307	5.08531e-07	-0.788744	5.23606e-07	203
CYP26C1	-3.7732	-3.88356	0.110361	0.415554	4.85902	1.1797e-06	0.826601	5.27828e-07	32
MSH2	4.41594	4.74754	-0.331596	0.00127004	-4.97781	6.43066e-07	-0.62685	5.29468e-07	67
PAK3	0.911261	-0.367138	1.2784	6.08984e-06	4.56719	4.94306e-06	0.775128	5.33028e-07	13
EMX1	-0.698056	-0.000880886	-0.697175	0.0949741	-4.7797	1.75556e-06	-0.768734	5.33286e-07	97
HINFP	3.39481	3.5528	-0.157999	0.0250504	-5.10605	3.28962e-07	-0.825967	5.37935e-07	83
ABT1	4.37927	4.58315	-0.20388	0.00594802	-5.04232	4.59922e-07	-0.813801	5.38902e-07	106
FFAR2	-0.717311	-0.397279	-0.320033	0.238607	-4.87997	1.061e-06	-0.746478	5.41082e-07	48
CALR	9.05864	9.36892	-0.310277	0.000486313	-4.86511	1.1439e-06	-0.739435	5.48737e-07	109
SUV39H1	3.42218	3.70046	-0.278274	0.0144148	-4.79179	1.65302e-06	-0.707712	5.62838e-07	70
KDM5B	5.71191	6.02637	-0.314459	0.000999289	-5.27189	1.35027e-07	-0.719678	5.63703e-07	73
SOX7	3.13641	2.68315	0.453255	0.0072329	4.80638	1.53684e-06	0.720313	5.67326e-07	63
CENPK	2.50227	2.86506	-0.36279	0.00474468	-4.87546	1.08556e-06	-0.539175	5.78078e-07	105
RASGRP3	3.74864	3.30846	0.440186	0.000736844	5.17569	2.2707e-07	0.817117	5.793e-07	13
TNFSF15	3.70428	4.06733	-0.363044	0.0327862	-5.18202	2.1949e-07	-0.677117	5.79423e-07	38
GRIA1	-1.8647	-3.11226	1.24756	6.50852e-07	4.66306	3.11546e-06	0.728864	5.80727e-07	12
PDK2	5.37017	5.30836	0.0618048	0.561648	5.10433	3.31969e-07	0.514992	5.84968e-07	67
SEC31A	7.55296	7.38072	0.172248	0.0388515	5.02218	5.10883e-07	0.770377	5.85957e-07	40
ZFP36	7.88546	7.55087	0.334591	0.0248206	4.60386	4.14727e-06	0.574105	5.86997e-07	74
SNAI2	3.29392	2.50665	0.787271	1.77271e-06	4.88207	1.04977e-06	0.642939	5.89244e-07	105
TNFRSF13B	0.0890021	-1.60883	1.69783	7.51321e-08	4.60171	4.19029e-06	0.751333	6.04734e-07	20
CAMK4	2.4128	1.50814	0.904664	9.21629e-07	4.87071	1.11195e-06	0.871291	6.11016e-07	9
STOML3	-3.79097	-3.28977	-0.501195	0.0279878	-5.31068	1.0922e-07	-0.633144	6.15607e-07	41
RAB10	7.055	7.2378	-0.182802	0.00610103	-4.77009	1.84144e-06	-0.627686	6.17224e-07	79
NAA15	5.49598	5.80736	-0.311371	8.36274e-05	-4.95082	7.39001e-07	-0.575451	6.22833e-07	119
ZNF829	0.983974	0.178146	0.805828	8.98349e-05	4.9794	6.37832e-07	0.69329	6.26464e-07	31
KCNH2	3.31438	2.71609	0.598283	0.0489933	4.61268	3.97507e-06	0.707304	6.28989e-07	27
LPAR2	3.67928	4.19439	-0.515111	5.03768e-06	-4.86944	1.11916e-06	-0.699308	6.29831e-07	75
PDE6B	-0.0709992	-0.819778	0.748779	0.000188106	4.83967	1.30054e-06	0.773886	6.29919e-07	16
PLXNC1	4.67297	3.8419	0.831074	1.61629e-06	4.91068	9.07605e-07	0.546409	6.34294e-07	26
TRAT1	0.893294	-0.339745	1.23304	4.61655e-07	4.99247	5.96106e-07	0.813673	6.43476e-07	8
GRIN1	-0.49153	-0.209139	-0.282391	0.264338	-4.89315	9.9236e-07	-0.760026	6.45826e-07	36
PTGER2	2.82454	2.65709	0.167452	0.438759	4.83592	1.32532e-06	0.725134	6.47883e-07	45
FOXD4L1	-2.43377	-2.27015	-0.163614	0.352394	-4.53761	5.68951e-06	-0.721601	6.65319e-07	47
PRKDC	7.60955	7.97858	-0.369029	0.000313333	-5.03605	4.75233e-07	-0.517038	6.67339e-07	120
LEO1	4.37006	4.5881	-0.218046	0.00670407	-4.88488	1.03492e-06	-0.746917	6.69027e-07	60
GRM6	-2.35965	-3.09152	0.731874	0.0001912	4.76213	1.91559e-06	0.813753	6.72966e-07	55
ZSCAN31	2.43928	2.27341	0.165872	0.237463	4.85127	1.22671e-06	0.49834	6.73446e-07	73
HOXC8	-0.709053	0.0103227	-0.719376	0.0104755	-4.77135	1.82998e-06	-0.41806	6.73577e-07	127
APBB2	5.44151	5.21261	0.228906	0.0282824	4.71358	2.43404e-06	0.731599	6.75351e-07	35
GNAI1	3.75946	3.16647	0.592983	0.000664431	4.80248	1.5671e-06	0.728194	6.80078e-07	42
GABRA3	-3.20072	-1.39517	-1.80555	0.000186275	-5.88362	4.01397e-09	-0.812062	6.85656e-07	127
SLC1A2	0.487233	-0.380919	0.868152	0.00208233	4.71041	2.47218e-06	0.628058	6.91485e-07	89
MCTP2	4.09358	4.29218	-0.198603	0.146619	-5.08	3.77434e-07	-0.615127	7.00554e-07	58
TNK1	3.29809	3.88599	-0.587894	4.29444e-07	-4.67246	2.97616e-06	-0.707101	7.10807e-07	116
TCEAL4	5.11801	4.56832	0.549689	7.43229e-06	4.82566	1.39539e-06	0.648256	7.1734e-07	115
DUSP19	2.13697	1.75909	0.37788	0.00304758	4.70662	2.51853e-06	0.690552	7.21271e-07	81
OR1Q1	-4.52454	-4.27476	-0.249779	0.0662487	-5.56007	2.69671e-08	-0.7083	7.21582e-07	41
CASP3	4.91795	5.24935	-0.331401	0.000905467	-4.88788	1.0193e-06	-0.738932	7.33921e-07	50
GPR20	-0.523458	-1.29227	0.768809	3.39669e-05	4.78152	1.73971e-06	0.631412	7.34239e-07	26
TNFRSF10B	5.57141	5.94702	-0.375603	0.00101209	-4.98892	6.07192e-07	-0.489038	7.37376e-07	70
TIE1	4.50282	3.75731	0.745501	7.06866e-07	4.74723	2.06217e-06	0.832467	7.38779e-07	38
MYO9A	5.1321	4.61434	0.517763	1.73336e-07	4.85535	1.20173e-06	0.776818	7.44532e-07	137
FOXS1	2.21155	1.20077	1.01078	7.31401e-07	4.76899	1.85154e-06	0.616029	7.47539e-07	118
RIPK2	4.31897	4.58639	-0.267421	0.0106843	-4.94952	7.43962e-07	-0.492439	7.50044e-07	131
ITPKA	2.02762	3.05638	-1.02876	3.5515e-06	-4.81736	1.45467e-06	-0.687932	7.62605e-07	111
DCC	-1.80373	-2.36875	0.565018	0.0147554	4.60709	4.08342e-06	0.783045	7.63046e-07	203
ATP2A2	8.32901	8.55703	-0.228011	0.00262352	-4.74822	2.05217e-06	-0.468282	7.64882e-07	92
MTDH	7.55068	7.67199	-0.121313	0.104869	-4.88431	1.03793e-06	-0.605014	7.65552e-07	151
SH2D3A	3.99448	4.37463	-0.380149	0.00359418	-4.68336	2.82213e-06	-0.656007	7.96236e-07	70
OR52N4	-3.27705	-3.86422	0.587168	0.00205284	4.8263	1.39094e-06	0.805604	8.01546e-07	43
CEBPZ	5.21245	5.4702	-0.257757	0.00100623	-4.88128	1.05399e-06	-0.725551	8.05041e-07	85
GTF2IRD2B	3.94933	3.61352	0.335807	0.00154757	4.73368	2.2048e-06	0.607353	8.05044e-07	68
SMARCC1	6.54191	6.82801	-0.286098	0.000527083	-4.94371	7.66501e-07	-0.657005	8.11358e-07	75
ILF3	7.46627	7.65395	-0.187674	0.00274049	-4.89715	9.72389e-07	-0.658225	8.12507e-07	110
SUMO1	5.88435	6.06344	-0.179093	0.00768476	-5.06049	4.18182e-07	-0.762912	8.14324e-07	137
TAS1R1	-3.16838	-3.33082	0.162447	0.359582	4.6753	2.93521e-06	0.657528	8.21733e-07	72
ITGB2	6.00119	4.99501	1.00617	1.40305e-06	4.94792	7.50117e-07	0.739755	8.24398e-07	19
RPS6KA5	3.77172	3.49524	0.276482	0.0280134	4.67353	2.96062e-06	0.586631	8.30241e-07	48
MYO1E	6.45106	6.41005	0.0410169	0.689303	-4.76053	1.93089e-06	-0.660318	8.33169e-07	60
ZNF641	4.23708	3.91717	0.319905	2.68083e-05	4.88908	1.0131e-06	0.769894	8.57434e-07	42
ZNF43	2.85861	2.33031	0.528298	0.0249498	4.77416	1.80461e-06	0.856845	8.71957e-07	17
LILRA1	0.174903	-0.653457	0.828361	1.3662e-05	4.81428	1.47732e-06	0.772007	8.76957e-07	24
TGFBR1	5.88533	5.52559	0.359738	0.00146896	4.71037	2.47262e-06	0.692488	8.79218e-07	31
ARHGAP18	4.97256	5.15877	-0.186213	0.0354208	-4.74037	2.13331e-06	-0.611616	8.94114e-07	79
PITX2	-1.28435	-1.11426	-0.17009	0.673338	4.63321	3.60038e-06	0.738451	8.992e-07	67
ALX4	-3.03295	-3.32896	0.296009	0.115039	4.74987	2.03549e-06	0.744726	9.00814e-07	64
PYGO2	5.37458	5.57163	-0.197047	0.0031632	-5.07601	3.85451e-07	-0.75919	9.14374e-07	89
ACOT11	4.10456	4.57863	-0.474068	0.00141753	-4.78167	1.73844e-06	-0.655794	9.16717e-07	79
CCR9	-2.05177	-2.70447	0.652699	0.00101395	4.81375	1.48127e-06	0.765011	9.26725e-07	39
GPR12	-4.06634	-4.43251	0.366173	0.0107697	4.59277	4.37406e-06	0.656116	9.29557e-07	25
ELP3	4.36903	4.31281	0.056219	0.48868	-4.98111	6.32195e-07	-0.644785	9.48929e-07	145
APC2	0.585896	0.305026	0.28087	0.121102	5.25603	1.47199e-07	0.607093	9.52428e-07	73
ATXN7L3	5.55627	5.7989	-0.242627	0.0014769	-4.81717	1.45611e-06	-0.730304	9.5244e-07	135
ZNF585B	3.56703	3.05974	0.507295	0.00308876	4.81591	1.46528e-06	0.755573	9.53754e-07	40
GNG13	-3.43963	-3.78574	0.346117	0.0940333	-4.91668	8.80226e-07	-0.671973	9.68267e-07	22
DAPK3	5.30179	4.93421	0.367581	0.000119398	4.64769	3.35671e-06	0.716839	9.7063e-07	124
ZNHIT3	3.93048	4.12498	-0.194497	0.00460596	-5.04019	4.6506e-07	-0.795217	9.74637e-07	129
ZDHHC20	6.53308	6.93563	-0.402549	3.4069e-05	-4.72317	2.32194e-06	-0.693495	9.76837e-07	87
TRIM5	4.20011	4.01616	0.183943	0.052581	5.08116	3.75143e-07	0.825011	9.88085e-07	51
CDKL2	-0.899398	-1.21771	0.318312	0.213472	4.71686	2.39517e-06	0.717488	9.91506e-07	31
ALDH1A2	-0.213811	-1.27999	1.06618	0.0004219	4.74374	2.09809e-06	0.673807	9.98529e-07	22
DMRTA1	-0.724626	-1.33013	0.605506	0.0750021	4.74357	2.09987e-06	0.48257	1.00109e-06	160
CERS5	4.29529	4.25295	0.0423385	0.411939	4.60659	4.09334e-06	0.759834	1.00525e-06	91
HTR1E	-4.0049	-4.65509	0.65019	4.5268e-06	4.65224	3.28353e-06	0.410231	1.01074e-06	42
LHX1	-3.83981	-2.89851	-0.941293	0.00318541	-5.49833	3.83407e-08	-0.555215	1.01897e-06	60
SP140	2.66367	1.50814	1.15552	2.30814e-08	4.73511	2.18938e-06	0.755715	1.03834e-06	84
APEX1	6.50959	6.74987	-0.240277	0.00969748	-4.95027	7.41118e-07	-0.807674	1.03896e-06	196
TEAD1	5.96693	5.64835	0.318582	0.0100586	4.55994	5.11686e-06	0.684963	1.04095e-06	112
LILRB1	2.95449	2.0613	0.893185	1.54511e-06	4.82707	1.3856e-06	0.706702	1.04412e-06	17
GDF3	-3.07109	-3.54123	0.470144	0.00319573	4.4606	8.17319e-06	0.796997	1.04622e-06	18
STK17A	4.6913	4.37284	0.318461	0.000131987	4.80624	1.53792e-06	0.757043	1.05975e-06	36
DAP	7.25351	7.48351	-0.230005	0.0124297	-4.78428	1.716e-06	-0.723396	1.06773e-06	60
CD5	3.1643	2.34441	0.819896	0.000198242	4.83588	1.32557e-06	0.74515	1.07624e-06	9
SLC20A1	5.11996	5.38558	-0.265617	0.00625287	-4.76483	1.89011e-06	-0.566091	1.08408e-06	43
MED8	4.72231	4.82273	-0.100421	0.110143	-4.77915	1.76036e-06	-0.729963	1.08459e-06	125
DPYSL2	6.52359	6.1654	0.358185	0.00343473	4.66102	3.14651e-06	0.634221	1.09235e-06	30
AFAP1L2	3.92699	3.67063	0.256359	0.0953343	4.80402	1.55515e-06	0.762986	1.09384e-06	29
STC1	4.81552	4.51111	0.304412	0.104056	4.80048	1.58288e-06	0.707833	1.09978e-06	49
MXD4	5.9258	5.517	0.408805	6.22166e-05	4.83793	1.31198e-06	0.621116	1.10532e-06	166
JAK3	4.6968	3.91288	0.783924	2.89309e-06	4.70861	2.49414e-06	0.81561	1.10686e-06	17
TACSTD2	5.41659	6.35092	-0.934331	0.00422616	-4.75664	1.9684e-06	-0.682109	1.12429e-06	75
POU2AF1	4.03832	3.07562	0.962702	0.00147712	4.53765	5.68848e-06	0.740915	1.13061e-06	279
RTKN2	2.46618	3.16552	-0.69934	2.14373e-05	-5.07559	3.86289e-07	-0.64804	1.13232e-06	46
REM2	-1.17104	-1.03812	-0.132921	0.329589	-4.77452	1.80138e-06	-0.804698	1.13748e-06	39
CERKL	3.20716	2.55969	0.647468	6.44499e-07	4.6816	2.84649e-06	0.784695	1.1463e-06	18
YWHAG	6.99465	7.15777	-0.163112	0.0372973	-4.72246	2.33008e-06	-0.520378	1.14717e-06	70
CERS4	2.79012	2.15877	0.631357	0.0123076	4.75426	1.99178e-06	0.652113	1.15048e-06	139
GRPR	-1.36787	-2.5451	1.17723	8.00976e-05	4.40226	1.07128e-05	0.7553	1.15918e-06	15
CDCA7L	4.15337	4.29962	-0.146254	0.365258	-4.70073	2.59232e-06	-0.715895	1.16299e-06	126
TENM2	0.304013	-0.825112	1.12913	0.000902633	4.66545	3.07944e-06	0.704164	1.16593e-06	20
NR5A1	-4.34922	-4.00632	-0.342898	0.0631118	-4.93007	8.22006e-07	-0.725368	1.16849e-06	85
TPM3	8.24228	8.59949	-0.357213	1.02823e-05	-4.85297	1.21625e-06	-0.662687	1.17861e-06	40
ZNF474	-2.12311	-2.52305	0.399937	0.0342216	4.94343	7.67589e-07	0.614946	1.17877e-06	79
PNRC2	6.32406	6.46336	-0.139297	0.0531577	-4.77912	1.76062e-06	-0.765909	1.18705e-06	87
CXCL3	3.26569	4.42516	-1.15947	0.000136192	-4.61047	4.01751e-06	-0.663377	1.18893e-06	42
RGS8	-3.09374	-3.85118	0.757441	3.23093e-05	4.88443	1.03726e-06	0.649097	1.19138e-06	52
CCNC	5.13728	5.45522	-0.317938	0.000402808	-4.74436	2.09167e-06	-0.715771	1.19197e-06	159
CEACAM6	6.89483	7.77446	-0.879632	0.0543313	-4.74818	2.05252e-06	-0.569273	1.19518e-06	73
CREB3L4	2.68631	3.09363	-0.407317	0.0033365	-4.76761	1.86427e-06	-0.601867	1.19638e-06	129
ARFGEF1	6.03854	6.33797	-0.29943	0.00216647	-4.79112	1.65856e-06	-0.731007	1.19771e-06	77
AEN	4.43597	4.76585	-0.329881	0.00344219	-4.79277	1.64492e-06	-0.703209	1.20026e-06	51
HDAC10	4.33627	4.60445	-0.268183	0.00309036	-4.73879	2.14996e-06	-0.688569	1.20891e-06	285
POLR3F	2.8948	3.15388	-0.259075	0.00286993	-4.95712	7.15463e-07	-0.762213	1.21031e-06	175
SIGLEC8	0.898913	-0.659074	1.55799	2.7869e-08	5.02788	4.9592e-07	0.683347	1.2197e-06	12
P2RX3	-2.80646	-2.00481	-0.801646	0.00630215	-4.83077	1.36008e-06	-0.629849	1.22436e-06	79
PPP1R12A	6.47518	5.96352	0.511658	2.14339e-07	4.59122	4.40662e-06	0.70231	1.28455e-06	59
PDE9A	1.87382	1.48229	0.391535	0.106667	4.63615	3.54952e-06	0.660468	1.31868e-06	33
ABCA1	5.64996	4.82892	0.821033	5.50984e-09	4.80343	1.55973e-06	0.782995	1.32365e-06	51
GKAP1	1.65601	1.30403	0.351979	0.00181115	4.62426	3.75932e-06	0.633329	1.33391e-06	82
DFFB	2.66926	2.76959	-0.100336	0.294616	-4.98249	6.27713e-07	-0.770686	1.33962e-06	55
TADA2A	3.32281	3.47286	-0.150052	0.0689985	-4.91407	8.92027e-07	-0.757283	1.34541e-06	75
DIRAS1	0.241938	-0.851361	1.0933	0.000263502	5.00762	5.51084e-07	0.603469	1.35702e-06	41
MYCN	0.986512	1.44159	-0.455079	0.112728	-4.89965	9.60073e-07	-0.606966	1.36147e-06	136
ELF4	5.85179	6.02105	-0.169265	0.0780122	-4.62797	3.69261e-06	-0.692849	1.37657e-06	116
ZNF516	4.13386	3.77054	0.363327	0.00562654	4.60419	4.14077e-06	0.621572	1.38204e-06	79
PBX1	5.73204	5.07705	0.65499	0.000288774	4.73487	2.19197e-06	0.673319	1.38509e-06	63
SDHC	6.17893	6.26412	-0.0851846	0.229377	-5.05102	4.39455e-07	-0.755669	1.39531e-06	61
CLNK	-0.423412	-1.26359	0.840176	4.03145e-05	4.94221	7.72417e-07	0.749757	1.40262e-06	14
MAML2	4.94209	4.59798	0.344112	0.00269223	4.7129	2.4421e-06	0.739148	1.41313e-06	71
STARD13	4.69359	4.15325	0.540336	5.38203e-05	4.5497	5.37224e-06	0.676515	1.4202e-06	26
PSEN1	5.99639	6.24782	-0.251425	0.000137299	-4.71792	2.38268e-06	-0.662387	1.42282e-06	58
POFUT1	6.14058	6.56467	-0.42409	0.000190618	-5.07026	3.97269e-07	-0.749797	1.43604e-06	158
FH	5.36451	5.68094	-0.316426	8.60358e-05	-5.00138	5.69211e-07	-0.796268	1.43844e-06	96
TAF9B	4.31459	4.16519	0.149408	0.133345	4.55423	5.25771e-06	0.668027	1.43879e-06	64
AGFG1	6.23962	6.47472	-0.235095	0.000877624	-4.61597	3.91257e-06	-0.610772	1.44368e-06	56
TXNDC12	6.05676	6.3121	-0.255339	0.000232987	-4.55316	5.28464e-06	-0.654665	1.46413e-06	44
HUS1	3.94081	4.08213	-0.141314	0.0274753	-5.01709	5.246e-07	-0.613364	1.47283e-06	55
RPS6KA1	5.73404	5.99848	-0.264444	0.0323234	-4.66187	3.13344e-06	-0.697645	1.47795e-06	94
FOXP1	6.56042	6.1388	0.421613	1.73992e-05	4.5912	4.40703e-06	0.740453	1.50854e-06	106
RAB3C	0.979397	0.110435	0.868962	0.00638334	4.73782	2.16025e-06	0.626483	1.50974e-06	12
GP1BA	0.497162	-0.282913	0.780075	0.000156038	4.67655	2.9174e-06	0.747622	1.51955e-06	26
ROPN1L	-2.92119	-3.04166	0.12047	0.486059	5.01394	5.3327e-07	0.789071	1.52332e-06	34
YEATS4	3.54834	3.94743	-0.399084	0.000396478	-4.81528	1.46991e-06	-0.692069	1.54297e-06	181
MAP2K6	2.49646	2.58169	-0.0852323	0.641845	-5.27116	1.35566e-07	-0.774051	1.58117e-06	33
ZNF35	2.63151	2.76136	-0.129843	0.058093	-5.02388	5.06372e-07	-0.605681	1.59492e-06	70
IHH	2.70093	3.7723	-1.07137	0.00424619	-4.57644	4.72962e-06	-0.69092	1.59806e-06	86
ZC3HC1	3.24091	3.2621	-0.0211865	0.778003	-4.85384	1.21095e-06	-0.82311	1.61907e-06	128
EPHA2	5.90531	6.82065	-0.91534	2.74122e-07	-4.58658	4.50559e-06	-0.617283	1.62153e-06	65
KCNIP2	-0.377446	-0.795478	0.418033	0.00306206	4.50431	6.65904e-06	0.526753	1.65807e-06	62
PA2G4	6.9005	7.21542	-0.314915	0.00169901	-4.83485	1.33244e-06	-0.653084	1.66094e-06	120
ZNF749	2.10017	2.25642	-0.156246	0.0721084	-4.89584	9.78863e-07	-0.577794	1.66381e-06	55
SMURF1	5.76309	5.98621	-0.223121	0.0271259	-4.59822	4.26109e-06	-0.68527	1.66433e-06	65
PPP3CB	5.3809	5.01927	0.361628	8.84373e-06	4.665	3.08611e-06	0.623961	1.67524e-06	23
TNFRSF21	6.91963	7.38453	-0.464899	0.00183005	-4.58152	4.61606e-06	-0.717885	1.68301e-06	37
AATF	5.45986	5.79642	-0.336561	0.00302967	-4.98222	6.28605e-07	-0.767707	1.68311e-06	68
ZNF407	3.62802	3.46389	0.164131	0.0316098	4.76809	1.8598e-06	0.738828	1.68929e-06	127
CKS2	4.59664	5.20653	-0.609897	4.72733e-05	-4.97571	6.50073e-07	-0.617737	1.69066e-06	114
NLRC3	3.28088	2.26781	1.01307	2.468e-08	4.61038	4.01943e-06	0.852976	1.69149e-06	18
SH3BGR	0.772343	-0.0140891	0.786432	1.84681e-05	4.32891	1.49852e-05	0.656025	1.69217e-06	11
GPR173	0.452861	0.0405418	0.412319	0.0190212	4.55747	5.17742e-06	0.748507	1.69976e-06	41
PAK1IP1	3.54173	3.93474	-0.393008	9.358e-05	-4.90061	9.55416e-07	-0.64331	1.70018e-06	58
ARHGEF26	2.6884	1.75043	0.937963	0.000779738	4.49468	6.96752e-06	0.649591	1.71723e-06	30
ZFHX3	6.35397	6.08062	0.273348	0.0166107	4.39707	1.09721e-05	0.710203	1.74046e-06	75
RASL11B	0.638837	0.18283	0.456008	0.0569403	4.41941	9.89691e-06	0.568964	1.74236e-06	36
ZNF22	4.15648	3.97211	0.184368	0.038961	4.46016	8.18998e-06	0.662868	1.74998e-06	99
TAF1D	5.2417	5.63867	-0.396969	9.75803e-05	-4.79562	1.62171e-06	-0.753752	1.75575e-06	165
ZNF711	2.50688	2.97896	-0.472078	0.0034308	-4.78868	1.67881e-06	-0.783178	1.76122e-06	92
DEPDC4	-1.18802	-0.805121	-0.382896	0.000256065	-4.93142	8.16323e-07	-0.758029	1.76329e-06	49
MAP3K13	5.272	5.4908	-0.218796	0.026794	-4.43789	9.08436e-06	-0.746679	1.79271e-06	45
PREX1	5.54561	4.95726	0.588351	4.43437e-05	4.6794	2.87718e-06	0.791834	1.8016e-06	30
ZNF726	-0.979724	-1.05996	0.0802333	0.76491	4.80742	1.52887e-06	0.813921	1.8045e-06	77
CXCL16	6.84038	7.21647	-0.376089	0.00663872	-4.50207	6.72936e-06	-0.540998	1.8083e-06	55
EFCAB6	-0.423415	-0.533252	0.109836	0.524256	4.7338	2.20356e-06	0.556939	1.8125e-06	214
SMAD6	4.18681	4.72368	-0.536874	0.000132395	-4.67761	2.90241e-06	-0.679244	1.81257e-06	93
ZNF334	0.363445	-0.0329644	0.39641	0.223531	4.87479	1.08923e-06	0.623055	1.82557e-06	55
NCOA1	6.19913	6.00237	0.196768	0.00568143	4.75659	1.96886e-06	0.670907	1.82834e-06	75
ERRFI1	5.85879	5.64722	0.211561	0.16602	4.54038	5.61516e-06	0.532082	1.84216e-06	53
RAB36	2.57294	2.437	0.135941	0.514712	4.6142	3.94613e-06	0.744114	1.8461e-06	34
LPIN2	6.12459	6.52264	-0.398048	0.00124665	-4.57813	4.69141e-06	-0.647776	1.85777e-06	124
PIK3CB	5.36664	5.75218	-0.385532	2.96997e-05	-4.64359	3.42404e-06	-0.549248	1.88014e-06	35
GPR153	4.33611	4.08368	0.252424	0.199935	4.42259	9.75238e-06	0.728174	1.88732e-06	38
RAP1GAP	3.52978	4.61668	-1.0869	6.36594e-05	-4.39199	1.12316e-05	-0.636525	1.89343e-06	86
DST	7.19724	6.67507	0.522169	0.0022457	4.54535	5.48447e-06	0.682004	1.89739e-06	70
ZNF296	2.44888	2.74671	-0.29783	0.047202	-4.80162	1.57384e-06	-0.7036	1.91067e-06	62
ZNF426	3.5745	3.44054	0.133955	0.310887	4.70921	2.48678e-06	0.656498	1.91425e-06	99
ZNF660	0.741657	-0.0823698	0.824027	9.09892e-06	4.69297	2.69273e-06	0.747149	1.93097e-06	73
HOXC4	2.20605	1.97452	0.231529	0.257291	4.44233	8.89896e-06	0.641635	1.9487e-06	95
NEK4	4.42568	4.72101	-0.29533	0.000373131	-4.65638	3.21822e-06	-0.732211	1.96501e-06	51
ZNF418	0.0416228	-0.541293	0.582916	0.0134434	5.02548	5.02185e-07	0.625683	1.96518e-06	20
ZNF189	3.95694	4.19434	-0.237399	0.0150632	-4.64594	3.38535e-06	-0.760374	1.99332e-06	68
MED12L	-0.309461	-0.810511	0.50105	0.0741895	4.58688	4.49925e-06	0.736657	2.03724e-06	165
GPR52	-3.52439	-4.00137	0.476971	0.000343063	4.441	8.95411e-06	0.718092	2.04433e-06	40
PRDM10	3.64648	3.8106	-0.164121	0.0149253	-4.6602	3.15908e-06	-0.671677	2.09121e-06	110
ASAH2B	2.21359	2.52063	-0.30704	0.0284194	-4.18998	2.78978e-05	-0.619338	2.0992e-06	27
RHOXF1	-4.05008	-4.17383	0.123747	0.390817	4.52539	6.02856e-06	0.640188	2.1047e-06	73
LRP12	2.7677	2.51607	0.251626	0.0899416	4.69123	2.71565e-06	0.710577	2.10555e-06	43
PPP1R1B	5.07405	5.92544	-0.85139	0.065492	-4.47122	7.77739e-06	-0.642459	2.12126e-06	58
PLAA	4.60739	4.67913	-0.0717427	0.555289	-4.67555	2.93167e-06	-0.62031	2.12513e-06	47
PASD1	-4.73368	-4.09593	-0.63775	0.0228198	-5.21053	1.88307e-07	-0.770326	2.13166e-06	35
INPP4B	4.73909	4.27132	0.467768	0.0038388	4.86505	1.14428e-06	0.73751	2.13932e-06	34
ITGA2	5.5824	6.15627	-0.573872	0.000478281	-4.70495	2.53933e-06	-0.438984	2.18622e-06	66
ZNF440	3.79191	4.03504	-0.243134	0.0177842	-4.58619	4.51406e-06	-0.695955	2.19005e-06	78
ZNRD1	3.56425	3.91569	-0.351434	8.70913e-05	-4.88341	1.04265e-06	-0.749436	2.2459e-06	172
CD3G	2.58686	1.71294	0.873927	2.88527e-05	4.59003	4.43179e-06	0.778628	2.26804e-06	12
ZAP70	2.60193	1.78888	0.813048	0.000184475	4.54673	5.44857e-06	0.777741	2.29432e-06	31
PRKCQ	1.66901	0.932716	0.736296	0.00197136	4.85802	1.18566e-06	0.769982	2.30044e-06	12
RAB26	-0.20109	0.164696	-0.365786	0.0895669	-4.73635	2.17603e-06	-0.530537	2.30174e-06	96
HSFX2	-2.18244	-2.73099	0.548545	0.0185303	-4.5917	4.39654e-06	-0.810359	2.30545e-06	56
CAD	6.00824	6.38419	-0.37595	5.49168e-05	-4.72499	2.30125e-06	-0.521257	2.30748e-06	115
APOL3	4.70636	3.94347	0.762887	1.73473e-05	4.83663	1.32061e-06	0.708406	2.31684e-06	21
ESRRB	-2.37561	-2.72888	0.353262	0.1087	4.43482	9.21494e-06	0.491426	2.32881e-06	150
TIPIN	2.29099	2.62876	-0.337763	0.000638486	-4.80189	1.57177e-06	-0.56932	2.34904e-06	45
TAB1	4.37088	4.37818	-0.00730125	0.921189	4.69469	2.67014e-06	0.516579	2.38694e-06	84
KLF7	4.79019	4.2705	0.519692	0.000432315	4.6302	3.65318e-06	0.724005	2.39617e-06	63
PLEKHM3	2.04557	1.79502	0.250546	0.00690834	4.67857	2.88881e-06	0.724757	2.41887e-06	129
ID2	5.62715	5.64047	-0.0133176	0.912828	4.54492	5.49557e-06	0.607892	2.42614e-06	99
HSPB1	8.76605	8.27452	0.491525	0.00864087	4.67853	2.88939e-06	0.673037	2.47254e-06	63
[truncated: 1,610 more rows]
