# Supplementary material for: Gene Regulatory Network Characterization of Gastric Cancer’s Histological Subtypes: Distinctive Biological and Clinically Relevant Master Regulators
Source: Cancers (Basel). 2022 Oct 10;14(19):4961. doi: 10.3390/cancers14194961 (PMC9563962; doi:10.3390/cancers14194961)
Supplement: Supplementary file 1 [file cancers-14-04961-s001.zip › FileS5.xlsx]

## Sheet: Sheet1
row.names	microsatellite	histological_type4	pathologic_T	ageD	primary_therapy_outcome_success2	anatomic_JGCA	gender	followup_treatment_success	primary_therapy_outcome_successBIN2	pathologic_stage3	anatomic	pathologic_N	pathologic_M	h_pylori_infection	pathologic_stage2	Fpval
MLH1	4.28095e-29	0.000105317	0.00464105	0.0332131	0.0579542	0.141884	0.996864	0.467695	0.486833	0.0605014	0.482543	0.377748	0.555125	0.161104	0.124823	1.73515e-26
RCVRN	3.63685e-06	1.41494e-14	0.000438121	0.00391757	0.0136642	0.0451238	0.100227	0.319067	0.671467	0.00656728	0.0562992	0.478498	0.150944	0.0427228	0.0689939	1.35544e-21
GPR88	3.22279e-07	5.45035e-15	0.000173272	0.0033649	0.0464622	0.237132	0.132616	0.363055	0.90558	0.0185349	0.268606	0.465104	0.222254	0.13621	0.0320243	1.08118e-20
EGR2	0.00240348	1.00958e-13	1.00786e-06	0.00956349	0.010425	0.215318	0.142675	0.390526	0.968253	0.00114816	0.0398704	0.575899	0.158068	0.0385098	0.0684411	2.55973e-20
BHLHE22	2.06674e-05	3.07736e-14	5.06584e-05	0.0066194	0.0559874	0.102214	0.16712	0.444436	0.543247	0.0119928	0.0329107	0.695403	0.566533	0.0335856	0.0612037	9.82456e-20
TENM4	0.0201835	1.59296e-11	2.62541e-08	0.0201177	0.000846858	0.238164	0.313365	0.666972	0.991595	0.000515795	0.0972432	0.639634	0.145337	0.059739	0.0256029	2.58029e-19
DCLK1	0.000105242	6.01527e-15	8.72569e-05	0.0209868	0.0849882	0.029447	0.0848503	0.654292	0.473925	0.0474773	0.015747	0.847321	0.215558	0.0426525	0.282291	5.45406e-19
PRDM6	2.72605e-05	1.41542e-13	2.32929e-05	0.00628702	0.00919708	0.2667	0.174758	0.484725	0.943559	0.012613	0.153428	0.689917	0.208437	0.0774243	0.0897709	8.46943e-19
ZIC5	5.32119e-19	0.000549615	0.0651311	0.0295531	0.0131138	0.028977	0.839019	0.144791	0.50277	0.136166	0.138138	0.41034	0.461204	0.0851185	0.0809266	1.17869e-18
GLI1	9.75426e-06	3.07191e-12	3.87859e-06	0.0320171	0.0176481	0.260674	0.316959	0.27836	0.866612	0.00356162	0.19797	0.310275	0.257728	0.129884	0.0337656	1.18857e-18
RGS4	0.00257073	6.13343e-13	2.53761e-05	0.000875832	0.00879958	0.0528887	0.0665051	0.378996	0.778542	0.0106429	0.104414	0.832591	0.2349	0.05437	0.115345	1.51854e-18
RSPO1	4.25954e-05	1.1762e-14	0.00195906	0.00438116	0.112457	0.0317446	0.0387004	0.490946	0.353238	0.102033	0.0337813	0.89133	0.364431	0.0198561	0.234982	1.80421e-18
PTHLH	0.0122807	3.54247e-12	6.20827e-07	0.00887267	0.0260103	0.1174	0.18994	0.486857	0.832676	0.00208447	0.085229	0.780553	0.049978	0.0577288	0.0278057	2.04438e-18
JAZF1	1.41092e-08	1.60925e-15	0.00347185	0.0173465	0.211853	0.208472	0.130247	0.237327	0.877029	0.108943	0.468653	0.749449	0.755198	0.206315	0.17073	4.5516e-18
AXL	0.000222654	6.35759e-15	8.57708e-05	0.00531394	0.028281	0.442625	0.210672	0.257353	0.715932	0.0254482	0.0959999	0.806836	0.251377	0.0412054	0.266027	4.63228e-18
PTGDR	0.00472739	3.51634e-17	0.000784337	0.0158792	0.30973	0.0687602	0.0579182	0.304408	0.909143	0.0333419	0.0144763	0.601139	0.294589	0.0976556	0.33791	5.26919e-18
IGF1	8.77347e-07	6.1707e-14	0.000418286	0.0135238	0.0733669	0.106763	0.117737	0.574177	0.625916	0.0586488	0.0860634	0.658482	0.443174	0.0908158	0.163303	5.74776e-18
MDFIC	8.84769e-07	1.64663e-14	0.000202084	0.020664	0.0619549	0.282343	0.209815	0.391981	0.864744	0.0235422	0.319052	0.465249	0.481213	0.138583	0.146032	6.49589e-18
GRHL2	7.36408e-07	1.35121e-15	0.0167903	0.00709123	0.0578649	0.266467	0.0231129	0.35414	0.471236	0.291636	0.126597	0.882186	0.447496	0.0359399	0.698745	6.50262e-18
DOK5	0.000338387	1.1838e-11	1.37737e-05	0.00170432	0.00502471	0.369677	0.493246	0.274734	0.649769	0.00719754	0.216921	0.743679	0.124536	0.0350393	0.034166	6.67385e-18
TWIST2	0.000138742	1.82954e-13	9.5442e-05	0.00165948	0.040791	0.182609	0.110154	0.480549	0.736989	0.0172856	0.252706	0.802875	0.250236	0.019998	0.132292	6.77595e-18
NMUR1	3.10835e-08	4.28533e-13	0.00368372	0.0070923	0.0446138	0.388917	0.0825698	0.426351	0.42327	0.145033	0.100118	0.846565	0.360897	0.0262549	0.282725	7.28241e-18
SOX9	0.000430425	5.66126e-19	0.0126769	0.0726353	0.139989	0.202071	0.00819369	0.625604	0.91354	0.248126	0.110821	0.9157	0.129156	0.0511893	0.625732	7.54836e-18
GAS7	6.22292e-06	7.75207e-14	0.000103265	0.0168122	0.0375401	0.365226	0.246654	0.608808	0.847893	0.0225607	0.192904	0.345434	0.326563	0.0705443	0.0972945	1.10238e-17
BNC2	0.000420663	4.94137e-14	6.34034e-05	0.0109888	0.0371288	0.0286231	0.109505	0.700825	0.76997	0.0428498	0.0281527	0.901918	0.297963	0.0805125	0.215078	1.13494e-17
MRAS	4.37785e-05	6.42836e-14	0.00110017	0.00201701	0.0179088	0.367848	0.0882781	0.388478	0.921354	0.193535	0.0223146	0.674798	0.0970764	0.0572242	0.283259	1.28754e-17
CPE	1.20192e-06	6.51838e-13	0.00108248	0.00307894	0.0368824	0.147691	0.0432977	0.390937	0.489886	0.0821221	0.111937	0.880642	0.403357	0.0835636	0.196763	1.35249e-17
CHKA	0.0221238	1.67111e-14	0.00211798	0.728036	0.0997645	0.000140722	0.0194731	0.546056	0.170216	0.340308	0.000214572	0.163826	0.325067	0.203925	0.690869	1.62534e-17
GREM1	0.00751969	7.98743e-11	7.86782e-07	0.0127003	0.00433959	0.0739355	0.343684	0.708606	0.744299	0.000972904	0.0627027	0.735635	0.386516	0.0586719	0.0248461	1.77208e-17
RAB32	8.39828e-06	3.29294e-11	3.3866e-05	0.0106257	0.0305076	0.964561	0.0523393	0.473046	0.456344	0.0191503	0.0453847	0.609517	0.350761	0.0230624	0.0633284	1.79707e-17
TCEAL7	3.15459e-05	2.01002e-14	0.000582049	0.00537969	0.070391	0.0713409	0.0705119	0.528781	0.610079	0.123702	0.0616782	0.967061	0.306817	0.0521467	0.361208	1.90885e-17
KCNIP1	7.26962e-05	3.12581e-13	0.000611444	0.0110372	0.0647713	0.0277069	0.0861484	0.559888	0.348271	0.110073	0.0143388	0.863583	0.320309	0.0162978	0.294819	1.91318e-17
GDF6	0.00052618	2.27836e-13	7.89704e-05	0.0073675	0.0120285	0.105875	0.121894	0.608987	0.821531	0.0384721	0.0588403	0.852155	0.155255	0.051203	0.205583	3.02976e-17
OMD	4.90896e-05	1.12137e-12	9.811e-05	0.00764525	0.0181858	0.0718634	0.116415	0.593945	0.724423	0.0524868	0.0727042	0.797652	0.212505	0.051577	0.198621	3.14915e-17
CDC42EP3	7.85481e-08	2.15223e-12	0.00268787	0.00861229	0.00360227	0.265927	0.0657486	0.59539	0.367115	0.103949	0.201445	0.952467	0.750174	0.0470124	0.536304	3.48926e-17
DTX3	1.66612e-12	3.94137e-07	0.00334847	0.00300605	0.00152896	0.685989	0.126237	0.563512	0.85904	0.0352743	0.473554	0.686714	0.470567	0.0670225	0.153432	3.92775e-17
P2RY14	5.93994e-07	4.50579e-15	0.00626702	0.0134602	0.124597	0.316748	0.0649847	0.548509	0.394485	0.138001	0.291899	0.754627	0.596455	0.027142	0.390738	4.00542e-17
FGF7	0.00201955	1.90226e-12	9.35802e-06	0.019059	0.0708628	0.0404677	0.151785	0.832728	0.454976	0.0141956	0.0411803	0.906112	0.162069	0.04762	0.0523265	4.0161e-17
ZIC2	1.15937e-16	0.00650293	0.812236	0.00815498	0.180131	0.0111913	0.660716	0.0737696	0.560645	0.0166832	0.036969	0.436392	0.239452	0.719985	0.00212205	4.40476e-17
GUCY1A1	0.000102036	1.10938e-12	1.72955e-05	0.0490622	0.030551	0.0609937	0.178829	0.718622	0.497501	0.0115435	0.0602277	0.705702	0.566344	0.0661402	0.148828	4.95205e-17
EYA1	4.31791e-05	4.34632e-14	0.000138085	0.00826191	0.0218307	0.163951	0.130255	0.600909	0.945929	0.0414699	0.147128	0.741027	0.183922	0.234355	0.291815	5.0755e-17
PDE1B	0.000288976	1.17735e-15	0.00111235	0.00692472	0.0484826	0.225885	0.069525	0.63855	0.62117	0.0912362	0.116126	0.887764	0.411983	0.0289432	0.386791	5.33746e-17
PCSK6	0.00661659	1.73823e-16	0.0524541	0.0696538	0.246267	0.00156589	0.000833248	0.629383	0.77271	0.436457	0.00508304	0.667458	0.115779	0.656554	0.594562	6.51815e-17
DDR2	0.00015115	9.22457e-14	6.1588e-05	0.0158491	0.0180021	0.0830166	0.241816	0.761191	0.705615	0.0279409	0.0845755	0.74765	0.462218	0.0987624	0.216842	6.78747e-17
DACT1	0.000440274	9.90005e-11	2.77987e-06	0.00780426	0.00563971	0.11557	0.34864	0.543179	0.92997	0.0058152	0.0826295	0.759955	0.206366	0.0746345	0.0788555	7.01702e-17
CABYR	8.71052e-14	0.00308096	0.0023234	0.226915	0.00520292	0.875828	0.112728	0.0898232	0.0689829	0.00360901	0.626437	0.232371	0.0329059	0.97806	0.00674101	7.39065e-17
ELANE	1.074e-05	3.55053e-16	0.0119006	0.00706018	0.262957	0.0942266	0.0896308	0.541813	0.526886	0.331064	0.0583238	0.902059	0.337151	0.134445	0.386627	8.6108e-17
PRMT2	0.000121142	2.19997e-16	0.018262	0.00337184	0.05427	0.104481	0.0395913	0.314345	0.6998	0.427551	0.178069	0.939309	0.53755	0.0316823	0.706015	9.46314e-17
SMARCD3	2.1723e-07	2.01661e-11	0.00158616	0.00160522	0.0088671	0.602672	0.065219	0.423234	0.754108	0.0912639	0.159734	0.836204	0.360231	0.0347311	0.456476	1.12557e-16
GPHN	8.42147e-14	4.05333e-07	0.0193007	0.00493559	0.0441116	0.573338	0.573149	0.0071388	0.516889	0.0386812	0.800874	0.609032	0.894555	0.695358	0.0430938	1.14224e-16
CRHBP	7.5808e-06	3.65966e-17	0.0143382	0.0307706	0.285648	0.28838	0.0556417	0.465748	0.406876	0.235974	0.178101	0.770922	0.398969	0.0968116	0.676993	1.16429e-16
GNB4	0.000197818	9.88405e-16	0.000107573	0.0555571	0.0887876	0.0881029	0.192831	0.728	0.752779	0.0406339	0.104231	0.870059	0.553845	0.202203	0.22701	1.16869e-16
PKIA	3.10728e-08	3.05724e-13	0.00243889	0.0393807	0.0685787	0.201037	0.044865	0.692472	0.695239	0.12332	0.229308	0.699648	0.442819	0.125413	0.308878	1.18656e-16
NDN	2.53492e-06	2.25485e-12	0.000896172	0.00268255	0.0149283	0.226229	0.0754192	0.446111	0.939838	0.0824039	0.110379	0.856289	0.374829	0.0627348	0.347184	1.19794e-16
MAP3K21	6.42114e-06	2.70077e-14	0.043914	0.0039014	0.0150397	0.412351	0.0249806	0.240253	0.686674	0.285977	0.246951	0.632647	0.252454	0.0132273	0.834101	1.21028e-16
MAPK10	2.85497e-06	7.25551e-14	0.00142357	0.0143933	0.113557	0.0959077	0.0826141	0.483862	0.499354	0.125885	0.08967	0.793387	0.404262	0.105863	0.285791	1.27778e-16
ERBB3	1.71034e-05	2.18191e-15	0.0390277	0.012322	0.0335831	0.217955	0.00460972	0.767539	0.471227	0.309707	0.227403	0.752986	0.265074	0.0419228	0.857775	1.37527e-16
DDIT4L	4.20487e-05	1.4689e-10	1.43297e-05	0.0114377	0.0203162	0.0523286	0.214851	0.385484	0.92752	0.018672	0.0642285	0.821784	0.259033	0.0414993	0.129344	1.40103e-16
VEGFA	0.000481658	1.01951e-17	0.245261	0.0253363	0.317074	0.0435557	0.00349624	0.531245	0.464725	0.911212	0.00583248	0.610625	0.528512	0.210222	0.93943	1.49921e-16
CSDC2	0.000264672	8.68498e-11	8.81628e-06	0.00526273	0.00520143	0.181692	0.295469	0.498114	0.953925	0.00606561	0.145744	0.768484	0.24212	0.0846056	0.0626466	1.50079e-16
NKX3-2	0.0144051	4.17376e-09	7.5453e-05	0.0855202	0.0548736	0.000217139	0.061256	0.71893	0.462838	0.0417095	1.00805e-06	0.777908	0.730381	0.108445	0.597422	1.71746e-16
ZFP64	0.000246944	3.24366e-17	0.04066	0.0129345	0.819061	0.0449515	0.0130695	0.201149	0.795257	0.437087	0.0794762	0.991857	0.245197	0.0995564	0.537609	1.72499e-16
CHRDL1	2.51621e-05	3.81958e-13	0.000695196	0.0108562	0.0563068	0.079491	0.0584363	0.532865	0.527202	0.0702694	0.0983905	0.742554	0.463853	0.0669877	0.181516	1.79769e-16
PRDM8	8.1829e-06	4.04286e-14	0.0082446	0.00808229	0.0270752	0.142984	0.0761115	0.623524	0.314929	0.22855	0.077417	0.889048	0.88032	0.0256331	0.3523	1.84613e-16
TGFB3	0.027028	5.33847e-14	0.000106207	0.016944	0.0274165	0.0685309	0.182199	0.616683	0.652683	0.0166844	0.0775852	0.892971	0.0458946	0.138814	0.0609353	1.85585e-16
EVL	8.62747e-08	9.98522e-12	0.00156118	0.0393975	0.0569564	0.439318	0.191859	0.265278	0.674918	0.0113465	0.40214	0.492555	0.961064	0.065157	0.0267804	1.9586e-16
OR4A47	5.80498e-12	0.000763381	0.000618221	0.0167697	0.012221	0.0168437	0.894797	0.0809502	0.653533	0.000673501	0.0891081	0.585627	0.55525	0.391519	0.0517059	2.00633e-16
EFNA1	6.15488e-06	5.93432e-16	0.00393689	0.0335937	0.132756	0.139872	0.0947448	0.803925	0.409298	0.0995449	0.167751	0.569662	0.773938	0.207236	0.419037	2.02389e-16
MAF	8.91815e-05	4.6401e-14	0.000637203	0.0102109	0.0746788	0.374484	0.162641	0.438246	0.26847	0.0620401	0.0298406	0.849505	0.498941	0.037767	0.483811	2.27378e-16
DFFB	1.36372e-11	1.33962e-06	0.00807217	0.00493751	0.00741907	0.210275	0.212556	0.0133285	0.308371	0.0605659	0.37812	0.565318	0.521263	0.355336	0.105099	2.65199e-16
GAS1	0.00654527	1.07255e-12	1.5931e-05	0.00519284	0.00834638	0.149004	0.237628	0.673177	0.854573	0.0189698	0.0941984	0.959754	0.17179	0.0596962	0.146678	2.6912e-16
PNRC1	0.000342758	1.75274e-16	0.0291973	0.00789649	0.183504	0.0888851	0.0298286	0.224181	0.411066	0.241923	0.0686804	0.914868	0.929147	0.0579918	0.502182	2.69742e-16
ZFP82	1.26324e-07	4.2527e-12	0.000749636	0.0532723	0.00824127	0.996188	0.0291535	0.825076	0.964311	0.0824097	0.222297	0.723303	0.139279	0.0887503	0.384697	2.71428e-16
TRIM24	0.0636695	1.88139e-16	0.0486789	0.0245178	0.331352	0.0104027	0.00864348	0.167758	0.593806	0.146226	0.0150093	0.851163	0.161158	0.182966	0.123131	2.96901e-16
CREM	1.4478e-05	7.64534e-14	0.0017707	0.013481	0.0449922	0.390541	0.0346006	0.603376	0.454231	0.0895877	0.199975	0.94815	0.203316	0.0310504	0.61497	2.99023e-16
FABP4	0.000287692	6.58351e-15	0.00434263	0.00858849	0.142532	0.0325353	0.0211739	0.328991	0.804411	0.230477	0.0401333	0.979753	0.289938	0.123094	0.491723	3.00344e-16
IL31RA	6.4256e-05	2.41114e-13	0.000150336	0.0893773	0.0430039	0.0598262	0.162516	0.887162	0.203181	0.042911	0.0319327	0.884936	0.965906	0.0938072	0.17132	3.03141e-16
RAP1GAP2	9.46955e-09	1.44148e-11	0.00162423	0.0312941	0.0267854	0.820372	0.111626	0.175532	0.986574	0.0243115	0.903878	0.749788	0.178692	0.23538	0.155372	3.21176e-16
FLRT2	1.78484e-05	1.77919e-12	0.000215462	0.00746751	0.0418661	0.120764	0.184405	0.547759	0.853914	0.0586191	0.126652	0.676354	0.194217	0.0959768	0.165084	3.42938e-16
TNFRSF19	5.69935e-17	4.39366e-06	0.0374041	0.0377905	0.153591	0.149655	0.393132	0.123684	0.921646	0.275472	0.333462	0.472548	0.728254	0.114964	0.260816	3.43984e-16
CCL2	0.0271705	7.74218e-13	3.94143e-05	0.0226093	0.0711624	0.467234	0.152742	0.517336	0.694427	0.00538354	0.0559171	0.927019	0.0898828	0.0041992	0.104688	3.68982e-16
MCC	1.74293e-06	1.08559e-12	0.000412926	0.0173424	0.0669073	0.107171	0.104988	0.639898	0.78619	0.0500797	0.203371	0.615745	0.385603	0.131562	0.231645	3.69813e-16
IRX1	1.0231e-05	4.54297e-11	7.7335e-05	0.00806241	0.0023727	0.283096	0.251121	0.561363	0.760257	0.0355927	0.262163	0.84996	0.197689	0.0600303	0.205522	3.89622e-16
AVPR2	2.76344e-07	9.29334e-13	0.0495383	0.00329714	0.091359	0.181467	0.104755	0.4057	0.278619	0.239431	0.0918916	0.687048	0.900926	0.0288067	0.125312	3.90599e-16
CITED2	0.000242899	1.01321e-17	0.0529259	0.00428185	0.255872	0.254778	0.0111655	0.376429	0.769357	0.573495	0.176579	0.930607	0.48418	0.11183	0.690716	3.97992e-16
ZNF626	1.82768e-09	2.02997e-13	0.0139124	0.014304	0.396863	0.581685	0.063384	0.329931	0.578733	0.166362	0.333141	0.677393	0.663165	0.270845	0.304437	4.04992e-16
ZCCHC24	2.30367e-05	1.71602e-12	0.00116499	0.00410015	0.0159376	0.107931	0.116225	0.596954	0.513095	0.108126	0.0566879	0.912973	0.594196	0.0449199	0.254219	4.16928e-16
ARHGEF25	5.29595e-05	1.94371e-12	0.000301715	0.00749866	0.0171044	0.0920492	0.0822069	0.585709	0.725342	0.0570197	0.0722924	0.857649	0.681865	0.0702985	0.206104	4.23177e-16
ZFPM2	0.000242979	3.51503e-13	0.000145382	0.011878	0.0166069	0.10508	0.0878175	0.639032	0.96295	0.0935154	0.118192	0.911104	0.150259	0.0780625	0.287236	4.41773e-16
GNG11	4.60424e-06	4.77934e-14	0.013989	0.00455818	0.175381	0.389114	0.0282128	0.458465	0.735845	0.260818	0.151699	0.80575	0.2102	0.0234784	0.329332	4.4204e-16
PRKAR2B	2.57197e-07	1.36594e-12	0.00232425	0.0373196	0.197012	0.0780438	0.0548505	0.446075	0.481531	0.0756309	0.152731	0.78583	0.969326	0.0367285	0.285425	4.69606e-16
EYA4	0.000172064	6.35002e-11	5.54476e-06	0.0348294	0.0114487	0.102924	0.182902	0.593361	0.89009	0.0119023	0.112036	0.817732	0.128373	0.128157	0.123467	4.86412e-16
ELOVL4	6.26923e-06	1.93353e-12	0.000405158	0.0162975	0.0426152	0.122319	0.0431189	0.459266	0.972008	0.0942321	0.153657	0.781335	0.217929	0.092922	0.302503	5.04368e-16
MAP3K12	4.5231e-15	6.60462e-06	0.0017387	0.0141649	0.071675	0.985711	0.345127	0.27357	0.560794	0.0642685	0.979236	0.440298	0.332259	0.0931228	0.256711	5.39828e-16
MACC1	1.51579e-05	2.91869e-15	0.0572487	0.00795755	0.0228034	0.678819	0.0128704	0.474773	0.555806	0.318597	0.204878	0.757586	0.438247	0.0365869	0.756653	5.61118e-16
S1PR3	2.59999e-06	9.13993e-12	0.000147913	0.0377128	0.00541939	0.10751	0.173544	0.823473	0.592035	0.0613531	0.127489	0.825021	0.581571	0.0653188	0.403333	5.68479e-16
LBH	1.35774e-07	5.89335e-11	0.000792751	0.0051185	0.00852122	0.789421	0.356083	0.471145	0.900463	0.0468738	0.289006	0.507627	0.358573	0.0779965	0.105469	5.84774e-16
RFX3	2.61115e-14	0.000140114	0.00104157	0.00233571	0.214898	0.395434	0.775946	0.131244	0.896348	0.0438854	0.842638	0.123206	0.29668	0.0410785	0.180186	5.99792e-16
HHEX	3.17857e-11	2.54152e-05	0.000244115	0.072179	0.00739042	0.294798	0.147923	0.187411	0.466379	0.0213245	0.40975	0.518519	0.0842723	0.0897166	0.0703061	7.84492e-16
PRKD1	0.000421265	1.5864e-12	4.38738e-05	0.0201622	0.0163824	0.0811424	0.140893	0.573762	0.840814	0.0548048	0.0421482	0.941148	0.236795	0.128402	0.277396	7.93444e-16
ARHGAP20	5.42383e-06	5.45799e-14	0.00118645	0.0170506	0.0381464	0.261826	0.0761073	0.710475	0.62616	0.119525	0.242363	0.889819	0.418389	0.0958295	0.473841	8.01433e-16
CNTNAP1	2.09849e-06	3.00159e-11	0.000724894	0.00743246	0.0128149	0.047812	0.181684	0.699988	0.627065	0.0858341	0.0624325	0.883729	0.53749	0.107158	0.244701	8.7505e-16
ZSCAN5A	8.11454e-05	1.83457e-14	0.00332172	0.0347928	0.0948771	0.0374946	0.0863675	0.724385	0.458837	0.158007	0.0706288	0.808979	0.694805	0.0315692	0.318181	8.75208e-16
HOXA11	1.43641e-10	2.90751e-09	0.233173	0.00284692	0.0514671	0.0658565	0.468444	0.537295	0.270598	0.127361	0.146895	0.894957	0.248297	0.0999363	0.0478525	9.78371e-16
MAP3K3	6.50631e-08	2.55472e-12	0.020386	0.00106223	0.0119487	0.53579	0.235757	0.540216	0.453772	0.259154	0.399187	0.6601	0.871353	0.059682	0.281654	1.01489e-15
CLEC1A	1.13088e-05	4.18675e-13	0.00200101	0.00839326	0.10684	0.528751	0.134714	0.744286	0.633239	0.105873	0.19736	0.778884	0.168558	0.00621935	0.29825	1.08699e-15
STAC	0.0013644	2.43111e-13	0.000977476	0.0283292	0.0122854	0.095056	0.0781664	0.924763	0.283004	0.0673678	0.0130718	0.922714	0.806993	0.0243237	0.427838	1.11447e-15
HDAC9	8.88868e-09	1.94241e-13	0.0201291	0.0174588	0.284843	0.40574	0.183246	0.245292	0.769107	0.114176	0.50608	0.732579	0.746945	0.190905	0.105175	1.13919e-15
NRK	0.00188282	4.3724e-10	2.38324e-06	0.0281362	0.00499028	0.0544551	0.242459	0.913503	0.730751	0.00402467	0.053888	0.759371	0.213122	0.0661457	0.285423	1.18038e-15
ZNF826P	6.51114e-08	1.3044e-10	0.000427056	0.038105	0.110651	0.618607	0.304425	0.10999	0.674252	0.0331073	0.238313	0.415473	0.401074	0.0400263	0.143155	1.18041e-15
ACTR5	0.000230949	5.58276e-18	0.0337054	0.00947334	0.358543	0.148772	0.0847901	0.381645	0.610341	0.40071	0.126391	0.913946	0.779587	0.170903	0.625693	1.21816e-15
FNBP1	5.13389e-08	2.74162e-13	0.0078696	0.0294103	0.072538	0.330596	0.0398339	0.854095	0.409248	0.266409	0.160703	0.748387	0.630908	0.225071	0.342102	1.22943e-15
DTX1	6.59403e-08	3.73976e-13	0.0210171	0.00564298	0.0947066	0.387261	0.274164	0.513315	0.87558	0.115191	0.334813	0.461402	0.6621	0.0816247	0.15424	1.38242e-15
DPYSL3	0.000446179	7.74941e-12	9.72066e-05	0.0154262	0.0158501	0.0442913	0.104994	0.819859	0.66699	0.0518893	0.033784	0.915057	0.44137	0.0518709	0.266497	1.42994e-15
CLIC2	0.000104345	2.29865e-15	0.0034529	0.0257612	0.412668	0.149001	0.182652	0.657199	0.532204	0.0949404	0.0784863	0.49753	0.457353	0.0760418	0.209105	1.54832e-15
PTCH2	5.3717e-07	1.50135e-11	0.00233228	0.00358186	0.152223	0.0380398	0.201683	0.38589	0.685489	0.201208	0.0673259	0.713797	0.32303	0.192371	0.187259	1.5932e-15
RASGRP2	2.06454e-08	2.51085e-13	0.0251725	0.0244975	0.157037	0.344454	0.0577698	0.468117	0.77525	0.212521	0.196995	0.580594	0.563601	0.106133	0.453408	1.6192e-15
IRF6	3.39068e-07	3.59652e-13	0.0200224	0.0230394	0.021841	0.27548	0.0387556	0.803138	0.371979	0.204644	0.184347	0.589944	0.607608	0.0852084	0.533257	1.62902e-15
BACH2	1.181e-05	6.075e-13	0.000912294	0.033803	0.112783	0.220156	0.0730386	0.255893	0.785936	0.062166	0.148737	0.471348	0.579066	0.189401	0.0626737	1.63416e-15
PRKCB	3.82771e-07	1.37313e-13	0.00695368	0.0495752	0.244631	0.138105	0.0549647	0.815644	0.402183	0.11004	0.157365	0.749034	0.974765	0.139158	0.125801	1.64787e-15
HTR7	3.7761e-06	7.78639e-16	0.0371634	0.0108537	0.115315	0.541122	0.0678044	0.345691	0.571137	0.210829	0.257683	0.765527	0.739253	0.152125	0.576458	1.76957e-15
MSC	0.000312442	1.78691e-10	6.82642e-05	0.00364316	0.0158362	0.90715	0.546706	0.177452	0.771225	0.00473352	0.27095	0.675905	0.0900556	0.0419007	0.0558872	1.79977e-15
PTGER3	0.000252712	3.93377e-12	3.24195e-05	0.0110798	0.0624861	0.0967921	0.203019	0.403817	0.977269	0.0342504	0.125372	0.883481	0.209879	0.109117	0.183467	1.81546e-15
GEM	5.02234e-05	5.6688e-13	0.000358861	0.0180489	0.0382988	0.167165	0.168197	0.546039	0.560992	0.0356098	0.307325	0.858158	0.530273	0.0758239	0.126693	1.89479e-15
MEOX2	0.00779824	1.80299e-13	0.00160559	0.00395572	0.146119	0.00583633	0.10377	0.581027	0.557949	0.302537	0.00703921	0.88563	0.181515	0.0804714	0.420102	1.9233e-15
GPR1	0.0836367	3.34808e-07	2.40252e-07	0.0466104	0.000436678	0.193863	0.448054	0.242289	0.161201	0.000198301	0.377452	0.767529	0.0229619	0.26315	0.018793	1.95714e-15
LRRK2	1.11187e-05	7.27712e-15	0.00188611	0.0282392	0.136989	0.260739	0.0827699	0.758878	0.669592	0.053583	0.307939	0.624395	0.530642	0.178257	0.486515	1.97721e-15
NTRK3	5.58179e-05	1.16484e-13	0.00208571	0.0105959	0.0950387	0.0406467	0.048388	0.370896	0.723782	0.169158	0.0530262	0.985007	0.573485	0.206582	0.423142	2.04067e-15
FOXH1	1.29508e-05	1.67827e-12	0.00549084	0.000970708	0.0310121	0.385286	0.142018	0.379466	0.960807	0.168357	0.0545807	0.40722	0.559846	0.0702247	0.362705	2.35607e-15
ELL2	3.34734e-07	2.66742e-14	0.0111685	0.0240914	0.152892	0.503795	0.0528657	0.465093	0.654521	0.191007	0.419243	0.75986	0.690489	0.110156	0.292393	2.45646e-15
ZFP36L1	0.00292758	9.9391e-14	0.00117162	0.00613326	0.0579769	0.112201	0.0279065	0.535675	0.426541	0.059269	0.146909	0.836301	0.326431	0.0330601	0.593823	2.46477e-15
TCEAL3	1.48751e-10	9.15924e-11	0.0471272	0.00238923	0.0610621	0.444351	0.136386	0.156783	0.737433	0.273202	0.559039	0.843563	0.715479	0.19257	0.36606	2.56993e-15
GADD45B	6.66236e-05	2.50314e-13	0.0139975	0.000897525	0.0214372	0.304554	0.0485345	0.206581	0.695166	0.0996942	0.330571	0.973341	0.84125	0.0358235	0.508127	2.7687e-15
HOPX	0.00300852	6.83013e-11	3.46409e-05	0.00501848	0.00711378	0.380755	0.245832	0.206393	0.510997	0.00878172	0.406975	0.457767	0.136218	0.112555	0.0751739	2.79092e-15
ESR1	4.71495e-06	9.73778e-15	0.00682419	0.0184971	0.2644	0.359277	0.0973111	0.466369	0.517335	0.136824	0.161435	0.46269	0.495537	0.201144	0.365122	2.82709e-15
PRRX1	0.0991562	3.176e-09	7.87274e-08	0.0945423	0.00773561	0.095512	0.466686	0.836452	0.723913	0.000769527	0.0802744	0.935854	0.0312917	0.137395	0.0412438	2.92465e-15
RUNX1T1	1.39898e-06	1.18393e-12	0.00473586	0.00514253	0.0620514	0.0483537	0.118327	0.680822	0.637978	0.39139	0.0553609	0.928768	0.592412	0.150813	0.471657	3.04391e-15
SLIT2	4.42898e-05	3.23366e-12	6.37689e-05	0.0128197	0.0128851	0.24461	0.301621	0.696884	0.594386	0.0477231	0.180221	0.867923	0.326623	0.134291	0.354186	3.07672e-15
RORB	5.21735e-06	3.90459e-14	0.000321726	0.0700026	0.357076	0.579763	0.135617	0.718615	0.516667	0.0081269	0.633155	0.750674	0.920186	0.256151	0.12749	3.17011e-15
EID3	2.14456e-09	1.23003e-11	0.00834857	0.0713403	0.0756678	0.315	0.0303016	0.390832	0.782422	0.171948	0.297056	0.790221	0.512529	0.232231	0.354055	3.32862e-15
PKNOX2	1.59297e-05	5.34508e-14	0.0103206	0.00478482	0.193327	0.133406	0.0394173	0.402309	0.629275	0.260111	0.108038	0.9166	0.457949	0.11552	0.401213	3.33494e-15
ROR2	9.32219e-06	1.5166e-11	0.000382631	0.00379732	0.00399394	0.406783	0.110737	0.558858	0.737064	0.112255	0.181117	0.980272	0.255719	0.180868	0.439908	3.44963e-15
VGLL3	0.00307198	7.31525e-13	2.46903e-05	0.0193192	0.0233032	0.0950359	0.259793	0.858623	0.817126	0.036255	0.0863988	0.929826	0.208517	0.0960455	0.253266	3.54669e-15
CHD3	2.85972e-07	1.81522e-13	0.0482658	0.00274558	0.0266513	0.434846	0.290848	0.706032	0.412378	0.199702	0.348525	0.677745	0.780874	0.159904	0.16425	3.60784e-15
TCEA2	9.63134e-14	8.02761e-05	0.00868533	0.00858698	0.00360733	0.252803	0.364878	0.297021	0.789578	0.0329349	0.389904	0.502573	0.450896	0.140344	0.355767	3.61086e-15
RALGPS1	0.097536	3.66789e-11	0.00033003	0.00454416	0.00195627	0.437093	0.0220567	0.202956	0.513414	0.00967802	0.0678002	0.736219	0.0717031	0.137364	0.130413	3.61291e-15
SSBP2	2.18563e-05	1.25341e-14	0.0143809	0.0161351	0.118153	0.0524426	0.033065	0.602531	0.625449	0.359962	0.0732416	0.927567	0.674358	0.129868	0.627256	3.63504e-15
ITGBL1	0.0046353	2.708e-08	5.71711e-08	0.0742483	0.00160936	0.235946	0.563624	0.797437	0.940077	0.0010708	0.257189	0.4668	0.12516	0.165494	0.0311676	3.85341e-15
PTGIS	6.07387e-06	8.88188e-11	0.000476115	0.0105896	0.0278349	0.126293	0.102898	0.500857	0.694923	0.0726542	0.176451	0.777539	0.172751	0.07035	0.176094	3.94388e-15
ARID5A	1.88054e-05	3.53675e-12	0.00519527	0.00419081	0.00581858	0.788638	0.161607	0.211912	0.659629	0.09904	0.176446	0.727195	0.611065	0.0180319	0.347778	3.94592e-15
RGS22	5.82539e-06	4.96655e-11	0.000257991	0.0208382	0.0151901	0.178638	0.108523	0.461246	0.753606	0.0763693	0.242059	0.881958	0.127653	0.0696046	0.321725	3.99326e-15
PLPP1	2.21836e-08	2.27281e-12	0.0111976	0.0035191	0.114913	0.743127	0.209533	0.279709	0.572003	0.182867	0.516708	0.904008	0.683396	0.077712	0.298833	4.11694e-15
FOXA2	0.0681117	2.47518e-15	0.00047015	0.140111	0.0761738	0.00437026	0.120453	0.779235	0.841538	0.112306	0.00845127	0.699451	0.262626	0.215267	0.736639	4.27024e-15
FCGR2B	0.0128456	1.27057e-13	0.000926102	0.0123735	0.171081	0.280643	0.0602083	0.279725	0.600025	0.0285557	0.0464818	0.826609	0.218475	0.0138421	0.269847	4.2918e-15
GPR68	0.00240612	1.70835e-11	9.72736e-05	0.01097	0.00714165	0.855037	0.345857	0.424731	0.676523	0.00607784	0.142403	0.452987	0.203265	0.229265	0.0167641	4.30353e-15
ZEB2	3.62975e-05	5.99644e-15	0.00154795	0.0269646	0.24881	0.200256	0.185848	0.7943	0.494953	0.0856299	0.125788	0.522808	0.515791	0.178439	0.492492	4.42445e-15
SIRT5	0.0263196	7.3761e-16	0.000807607	0.0210773	0.0242606	0.269325	0.0845954	0.819806	0.806614	0.0819451	0.0521921	0.508834	0.398052	0.136718	0.59615	4.46021e-15
MAPKAPK5	3.59674e-08	1.80563e-12	0.0952564	0.000558698	0.0401939	0.535029	0.0860237	0.583268	0.550945	0.272486	0.904016	0.485076	0.933552	0.215733	0.178368	4.58092e-15
MRGPRF	8.95682e-05	2.60604e-12	0.00167207	0.0100046	0.0354037	0.048323	0.107361	0.629324	0.449351	0.121325	0.0278929	0.925084	0.905332	0.0619856	0.251145	4.63404e-15
MKX	0.00060432	2.8135e-10	0.000184188	0.0159052	0.0164742	0.0107839	0.0388716	0.77466	0.367151	0.0817182	0.00942466	0.704088	0.490552	0.0747507	0.460208	4.63576e-15
L3MBTL4	1.08947e-06	3.56856e-15	0.0220409	0.0324328	0.286784	0.91185	0.161422	0.419329	0.531961	0.149181	0.22576	0.284135	0.858705	0.109272	0.382398	4.64938e-15
MAMLD1	1.60887e-06	1.05741e-12	0.00136037	0.0155065	0.0469178	0.260723	0.139216	0.782378	0.648358	0.157332	0.232755	0.787991	0.445268	0.0654027	0.352447	4.72971e-15
MSN	0.000389564	1.19877e-15	0.00704311	0.00482127	0.122927	0.795506	0.169112	0.637846	0.793433	0.213159	0.0744369	0.638765	0.49596	0.0634124	0.222514	4.82433e-15
ZNF165	1.56461e-08	8.69496e-14	0.0900527	0.0142724	0.04103	0.382595	0.222672	0.446575	0.245064	0.523159	0.302301	0.882043	0.878862	0.155419	0.743315	4.84874e-15
RGS9	9.64735e-09	2.56616e-11	0.0240621	0.0148132	0.110315	0.482331	0.0318748	0.364051	0.307634	0.215721	0.331021	0.699145	0.909317	0.0832617	0.202295	6.16344e-15
CCN2	0.0213553	3.03704e-10	2.93744e-06	0.00653377	0.000777259	0.537584	0.309602	0.620658	0.912472	0.00428299	0.526777	0.756791	0.349737	0.0307892	0.0818154	6.50513e-15
ASB2	4.77216e-06	9.17011e-14	0.0466339	0.0114658	0.0992576	0.152335	0.0413113	0.651637	0.323149	0.316233	0.0648574	0.821309	0.727492	0.142221	0.267597	6.74323e-15
OPRL1	2.07622e-06	2.76576e-09	0.000325541	0.00224963	0.00768835	0.66979	0.524302	0.263533	0.657105	0.02016	0.169538	0.395488	0.596893	0.101055	0.0901506	6.77974e-15
HOXA9	1.55754e-09	7.19483e-09	0.550726	0.00149595	0.0780264	0.0102393	0.841075	0.305047	0.160464	0.271561	0.0407626	0.813973	0.408652	0.115059	0.112575	6.79113e-15
RGL1	2.23013e-07	5.46431e-13	0.0141499	0.0423359	0.0530593	0.664693	0.083409	0.652957	0.29857	0.204937	0.178112	0.626241	0.65427	0.0505443	0.460579	6.82571e-15
MAP3K9	0.00482921	3.22772e-12	0.00112794	0.0315124	0.362299	0.0458207	0.00378518	0.222249	0.579352	0.0249033	0.0177222	0.983846	0.314448	0.0739493	0.322661	6.83607e-15
KCNK2	0.00258068	1.02037e-11	0.000259495	0.0418887	0.117667	0.0162352	0.0849091	0.432993	0.716602	0.0403985	0.0109665	0.730033	0.310885	0.0603884	0.167184	6.84347e-15
ZNF385D	0.000131285	1.45936e-13	0.00617816	0.00682854	0.276208	0.0591911	0.135775	0.584713	0.51864	0.177366	0.0581828	0.890317	0.425825	0.0503396	0.158715	7.71391e-15
AKT3	5.897e-05	6.61964e-13	0.000866963	0.0443916	0.0149051	0.0522775	0.0771285	0.769086	0.837217	0.108941	0.0952923	0.891609	0.60496	0.109461	0.490743	7.88548e-15
RRBP1	0.00973744	2.82423e-15	0.00581658	0.189277	0.21844	0.0160435	0.000790963	0.592524	0.888085	0.13659	0.0489274	0.900752	0.169439	0.630998	0.621877	7.95292e-15
HTR2A	1.40773e-06	8.39061e-12	0.000528326	0.00940425	0.207082	0.212299	0.302534	0.542567	0.807588	0.0813964	0.336974	0.667669	0.287581	0.0683045	0.147656	8.12738e-15
TAF4	0.0164325	3.73013e-17	0.0348237	0.00400289	0.224732	0.548956	0.046346	0.173853	0.983406	0.340606	0.0747032	0.863721	0.386191	0.044603	0.601597	8.42892e-15
RASSF2	1.52566e-06	8.21787e-15	0.0179307	0.0193679	0.309731	0.826737	0.144756	0.634734	0.878059	0.174265	0.234206	0.399409	0.286893	0.12445	0.380245	8.73825e-15
PLPP3	1.40576e-11	4.39546e-09	0.0110183	0.0208804	0.117607	0.738068	0.287209	0.356034	0.569811	0.143689	0.426267	0.510709	0.870466	0.0416943	0.246725	8.81885e-15
GRB7	0.00278367	9.08289e-16	0.107908	0.131549	0.124746	0.0692423	0.00307933	0.867341	0.0344854	0.567491	0.0635651	0.74156	0.38242	0.0762499	0.929076	9.01034e-15
ZFHX4	0.000494267	5.30469e-10	1.59861e-05	0.0150952	0.00820312	0.0607267	0.223892	0.810684	0.81899	0.0267758	0.0255602	0.839969	0.386704	0.0722808	0.280651	9.16027e-15
VIPR2	3.11266e-06	8.6901e-12	0.00534961	0.0200805	0.0448217	0.0728143	0.0881541	0.699335	0.272616	0.117232	0.0540006	0.937115	0.93822	0.101857	0.240055	9.35284e-15
LMO3	1.41343e-06	2.00355e-11	0.00110126	0.0203384	0.0626873	0.0811618	0.0818959	0.653346	0.631723	0.143134	0.0949392	0.792976	0.477423	0.133936	0.304168	9.75034e-15
ZNF664	5.79288e-05	8.88016e-15	0.0237719	0.00562201	0.20277	0.636136	0.125686	0.113345	0.788898	0.225043	0.400295	0.902092	0.396342	0.0318537	0.226708	9.85787e-15
PTGFR	3.45857e-06	5.19957e-13	0.000410149	0.0416866	0.199855	0.135316	0.238731	0.811126	0.513192	0.0811797	0.161425	0.843372	0.363451	0.213224	0.336202	1.00637e-14
BASP1	8.11832e-05	1.7448e-12	0.000942697	0.0135545	0.081871	0.76785	0.266231	0.274854	0.814969	0.0458146	0.178724	0.518826	0.212219	0.041097	0.103559	1.08069e-14
LPAR4	0.000273481	3.79872e-14	0.003666	0.0143446	0.221461	0.0182583	0.101365	0.792463	0.328902	0.395618	0.0209502	0.779843	0.170825	0.558237	0.727469	1.08508e-14
TCF21	2.62025e-08	2.38412e-12	0.0172818	0.002454	0.27699	0.609824	0.225468	0.130651	0.813559	0.330581	0.409499	0.773113	0.639847	0.124703	0.299458	1.10636e-14
ZHX2	6.32671e-12	2.70966e-09	0.0169184	0.0220434	0.176498	0.945794	0.0473934	0.168461	0.978259	0.249027	0.613004	0.959197	0.159234	0.203766	0.68457	1.11585e-14
PDE1A	2.62977e-06	5.8486e-12	0.000371063	0.0580277	0.168366	0.184784	0.138698	0.401763	0.858075	0.0710644	0.135976	0.665933	0.303892	0.122529	0.232686	1.12743e-14
CELSR3	0.000199065	4.1856e-17	0.0552025	0.00787311	0.169019	0.641447	0.0212904	0.451244	0.665309	0.274244	0.4488	0.828672	0.708149	0.233359	0.683241	1.17364e-14
ISL2	4.74442e-05	2.96996e-11	0.0067568	0.0129606	0.012715	0.0624288	0.0540847	0.648622	0.232775	0.100811	0.046701	0.861452	0.717566	0.0355758	0.349822	1.17591e-14
RGMA	2.84266e-06	1.95463e-11	0.00477363	0.00645053	0.0565941	0.0609115	0.166876	0.435432	0.506741	0.123596	0.0880086	0.815463	0.965984	0.0773222	0.201366	1.17605e-14
REM1	4.00406e-07	8.48278e-12	0.0164903	0.00391968	0.0525541	0.684053	0.197919	0.327769	0.321642	0.221994	0.141805	0.852374	0.79391	0.0360184	0.231154	1.18358e-14
ID4	5.97446e-05	1.94003e-12	0.00260114	0.00396716	0.0567502	0.15253	0.0433297	0.408961	0.96836	0.201091	0.189269	0.921371	0.296554	0.0472139	0.340494	1.19935e-14
ZNF582	1.74945e-08	1.59163e-12	0.0287082	0.0130652	0.102715	0.377615	0.0604513	0.624854	0.446728	0.382078	0.350851	0.840018	0.889647	0.113397	0.385555	1.20696e-14
CAVIN1	0.000111738	4.27474e-12	0.00112322	0.0040467	0.0132522	0.154344	0.193499	0.67807	0.68016	0.125636	0.0955889	0.847377	0.577995	0.0447167	0.287685	1.20847e-14
DCLK2	0.000145232	2.79265e-12	0.00249574	0.0157632	0.0167127	0.0488839	0.101768	0.91815	0.258283	0.188991	0.019782	0.883179	0.943178	0.107244	0.286073	1.21073e-14
SEPTIN6	1.52907e-06	3.75887e-13	0.0428015	0.0362521	0.0904727	0.254755	0.0191416	0.671947	0.348248	0.221448	0.171422	0.353389	0.74923	0.082287	0.421699	1.27568e-14
POU6F1	1.26978e-07	3.21418e-12	0.0109238	0.0295835	0.0216185	0.196942	0.125508	0.642578	0.40855	0.205387	0.26173	0.793246	0.972418	0.089907	0.480148	1.30725e-14
FCER1A	1.06781e-07	3.82132e-13	0.1326	0.00102385	0.540014	0.488728	0.0456495	0.18408	0.848063	0.560437	0.374585	0.700015	0.580764	0.0791759	0.488887	1.34766e-14
NGFR	0.00012702	2.91932e-12	0.00544957	0.0211908	0.115885	0.00970898	0.0298806	0.528675	0.47147	0.220117	0.0166267	0.819713	0.570243	0.102979	0.550184	1.35877e-14
ELP3	7.70832e-15	9.48929e-07	0.024419	0.0128135	0.19451	0.920473	0.50837	0.189775	0.581049	0.223777	0.958619	0.574903	0.877929	0.146348	0.0972705	1.37802e-14
HEXIM1	9.90354e-08	2.25114e-10	0.00342022	0.00559579	0.0809614	0.29061	0.280098	0.120493	0.826388	0.0919242	0.427217	0.602582	0.494788	0.0898726	0.120597	1.38197e-14
ABCC9	0.000216553	2.68457e-12	0.000559131	0.01563	0.0429706	0.0408695	0.0801865	0.848247	0.514782	0.15682	0.0720209	0.913676	0.431083	0.0594602	0.45041	1.43356e-14
EBF1	1.1417e-07	9.37511e-13	0.0140673	0.0233252	0.240435	0.0812019	0.115445	0.696568	0.399734	0.373902	0.192273	0.7861	0.473465	0.182456	0.356195	1.4672e-14
TCEAL5	7.54795e-07	9.54792e-12	0.0053245	0.00595361	0.0645373	0.160612	0.0590365	0.363977	0.723627	0.232943	0.167075	0.924766	0.492209	0.139479	0.433078	1.49954e-14
POMC	3.32255e-08	1.12007e-09	0.0057726	0.0045091	0.0110059	0.887232	0.231644	0.194984	0.82354	0.0696487	0.225222	0.57051	0.580044	0.132108	0.1636	1.5017e-14
ANK2	1.21536e-06	5.49844e-12	0.00449539	0.0265736	0.0941545	0.0683457	0.0744652	0.642522	0.531041	0.168135	0.0902475	0.734681	0.790953	0.115336	0.305959	1.53581e-14
RASL12	1.46037e-07	2.14182e-11	0.00206013	0.00301058	0.0296618	0.455665	0.345423	0.46159	0.702369	0.178235	0.395772	0.902622	0.62433	0.0964849	0.370927	1.57044e-14
LMO2	1.02657e-08	1.97016e-12	0.124489	0.00265603	0.281229	0.935427	0.162791	0.236264	0.669054	0.42333	0.461259	0.762981	0.603569	0.0363773	0.319497	1.73263e-14
MEIS3	0.00272893	1.25658e-09	2.18797e-05	0.00255111	0.00442014	0.390286	0.44469	0.494977	0.710325	0.00784771	0.211306	0.788649	0.0862572	0.0946805	0.086349	1.74131e-14
BCL2	6.18296e-06	6.23066e-15	0.103462	0.0307598	0.281673	0.112508	0.060846	0.403178	0.163444	0.542937	0.171885	0.861692	0.492611	0.211375	0.380596	1.79973e-14
ZNF667	6.92705e-05	4.10876e-12	0.000737464	0.0365726	0.0462619	0.0286004	0.047786	0.764801	0.971716	0.108005	0.0415756	0.86596	0.430663	0.185053	0.446604	1.80757e-14
ZNF812P	1.57913e-10	4.26557e-12	0.0955868	0.0116933	0.13035	0.908398	0.0777827	0.520502	0.585369	0.399367	0.997652	0.877819	0.369167	0.316837	0.582509	1.81974e-14
COLEC12	2.13074e-05	1.46636e-12	0.00225195	0.0173658	0.0287359	0.201767	0.165359	0.485377	0.916925	0.0759001	0.122883	0.78305	0.360927	0.0684864	0.570834	1.9155e-14
ELN	2.52887e-07	5.92782e-10	0.00121611	0.00347178	0.0377937	0.46252	0.401404	0.429224	0.884803	0.0582401	0.469097	0.390529	0.477939	0.0888347	0.0713397	1.93732e-14
NRIP2	5.78356e-08	3.81439e-13	0.0366537	0.00666516	0.184354	0.259399	0.235528	0.607785	0.502736	0.357781	0.321689	0.733508	0.715429	0.140605	0.357552	1.98807e-14
CYSLTR1	1.7329e-06	1.0768e-13	0.00952641	0.0454693	0.279711	0.519819	0.05598	0.555439	0.44278	0.123771	0.186042	0.601207	0.877158	0.0868876	0.331986	1.9979e-14
RTL3	0.0056032	3.90118e-11	0.00125034	0.00174286	0.0103855	0.0354765	0.0946583	0.871939	0.286754	0.170242	0.0181096	0.682306	0.55681	0.0197977	0.591971	2.0075e-14
CTBP2	5.10536e-11	1.03911e-10	0.0096504	0.0161138	0.24274	0.971619	0.277608	0.177877	0.553874	0.126599	0.772472	0.830902	0.536882	0.488108	0.514343	2.0425e-14
SREBF1	5.5217e-13	7.55597e-09	0.0241161	0.179982	0.0513263	0.867693	0.117276	0.62978	0.163334	0.0967627	0.656173	0.956286	0.532882	0.389658	0.476185	2.046e-14
WWTR1	7.59611e-05	4.71397e-13	0.00244589	0.018995	0.0433159	0.03996	0.087388	0.809267	0.611907	0.23426	0.0521597	0.943902	0.65473	0.113031	0.577627	2.12916e-14
MEF2C	5.27881e-07	1.67705e-14	0.0213625	0.0399659	0.329775	0.393301	0.0763995	0.699914	0.470599	0.414842	0.275875	0.763658	0.439363	0.137622	0.47296	2.13519e-14
IKZF4	8.89129e-08	5.86009e-11	0.00114471	0.0621444	0.0181915	0.13069	0.285133	0.692704	0.490067	0.0616165	0.286345	0.701467	0.850299	0.300969	0.23547	2.18844e-14
TDG	2.84368e-06	2.73182e-12	0.019739	0.00118591	0.0256109	0.864456	0.186176	0.165832	0.39671	0.232857	0.2329	0.935026	0.605667	0.05581	0.754162	2.19196e-14
EFS	5.77288e-05	5.02524e-11	0.000344048	0.00765815	0.0111028	0.345111	0.207866	0.295655	0.955832	0.0568688	0.386716	0.804927	0.155444	0.0936981	0.152873	2.30145e-14
RALGAPA2	0.00153666	1.52193e-09	0.000572317	0.0767858	0.0271796	0.13999	0.00752576	0.159633	0.884943	0.00310936	0.18927	0.873241	0.0733593	0.02167	0.200349	2.3078e-14
PLP1	0.000141465	2.14185e-12	0.00854747	0.00805869	0.113037	0.0406127	0.0333491	0.600784	0.303757	0.273312	0.0304637	0.987283	0.581767	0.0432804	0.573197	2.33803e-14
GPBAR1	2.58344e-06	1.1037e-11	0.00165214	0.00390746	0.0312794	0.810727	0.381125	0.191111	0.671811	0.0779289	0.266583	0.923482	0.370128	0.195476	0.219194	2.34645e-14
ARHGAP22	3.0328e-07	3.06281e-10	0.00109844	0.00588912	0.00525167	0.867295	0.515774	0.263923	0.968707	0.0586705	0.189751	0.781021	0.403248	0.119136	0.468579	2.37683e-14
ACKR1	2.10459e-05	1.03368e-13	0.0514019	0.0138802	0.399182	0.124031	0.0818867	0.312118	0.474606	0.379109	0.0764344	0.805009	0.729088	0.0182894	0.244695	2.38506e-14
EDA2R	1.55319e-05	6.73787e-12	0.00150352	0.032838	0.117109	0.166524	0.109792	0.221911	0.803453	0.200264	0.0808128	0.898531	0.0666697	0.110992	0.335592	2.39245e-14
EID2B	1.45536e-07	9.73951e-13	0.047435	0.062367	0.0519897	0.169338	0.0157759	0.777673	0.341667	0.315368	0.245053	0.766747	0.77579	0.221377	0.488874	2.54362e-14
DMBX1	2.87986e-06	2.10795e-15	0.254878	0.0149816	0.191361	0.555819	0.0339573	0.522827	0.321744	0.23752	0.54521	0.883446	0.847699	0.248438	0.24253	2.68075e-14
EGR1	3.92863e-05	1.57778e-14	0.0183257	0.00234919	0.0676172	0.282882	0.0907436	0.487979	0.592875	0.34807	0.405599	0.927607	0.624627	0.139091	0.553501	2.73424e-14
ARHGAP31	3.11557e-05	1.94622e-14	0.00522852	0.00932463	0.162634	0.48306	0.372356	0.787204	0.582077	0.193653	0.231122	0.692882	0.323093	0.0631427	0.348234	2.80834e-14
ZDHHC23	0.000459251	1.95814e-13	0.0319382	0.00105122	0.0688382	0.394236	0.0571813	0.128398	0.647261	0.352197	0.134375	0.875567	0.527725	0.0128243	0.816028	2.854e-14
NR3C1	2.35382e-07	1.03566e-13	0.0117453	0.0328922	0.286943	0.300335	0.125855	0.412648	0.692824	0.217846	0.342504	0.727565	0.596809	0.240139	0.406526	2.9357e-14
LANCL2	0.000388387	6.83199e-14	0.0215235	0.0253323	0.139128	0.00941401	0.0416229	0.628525	0.447427	0.312068	0.0392069	0.795	0.89997	0.0950504	0.505404	2.95854e-14
WNT1	2.09251e-09	1.71177e-09	0.00384897	0.0190137	0.0676553	0.80323	0.382943	0.443807	0.828413	0.0251183	0.370711	0.395924	0.587846	0.253562	0.0860262	2.99681e-14
ADGRB1	5.15234e-06	3.9286e-11	0.00151956	0.0217087	0.0793436	0.0212678	0.242283	0.356767	0.958119	0.0797734	0.0822901	0.732763	0.648104	0.236991	0.143567	3.1001e-14
MAP3K14	6.0752e-11	1.04071e-07	0.0863746	0.00891476	0.0811929	0.567251	0.767554	0.283912	0.321317	0.0595185	0.920329	0.439697	0.175929	0.0929583	0.0160432	3.10581e-14
HMGCR	2.13258e-09	3.37294e-11	0.0959787	0.00962483	0.0539962	0.332445	0.240255	0.18883	0.400774	0.241803	0.453105	0.737117	0.86772	0.173551	0.378985	3.12424e-14
ARL4D	3.01754e-08	3.50875e-11	0.0506349	0.00386045	0.0233996	0.321979	0.0145798	0.487377	0.627131	0.154986	0.525911	0.810314	0.78658	0.409549	0.677243	3.1283e-14
ADAMTS1	0.00053371	1.52095e-15	0.00609067	0.0331158	0.161588	0.344018	0.0909994	0.532984	0.546405	0.127953	0.338172	0.854512	0.547623	0.0584347	0.351265	3.13126e-14
NGF	0.0246192	3.76947e-12	0.000766227	0.00370242	0.0175996	0.0676447	0.0437018	0.621665	0.562355	0.0928502	0.0749287	0.608982	0.166787	0.10377	0.296285	3.22398e-14
ZDHHC15	9.07543e-06	1.32435e-11	0.00171282	0.0126788	0.0427322	0.112199	0.0570003	0.554598	0.807147	0.156801	0.12647	0.899107	0.357565	0.125629	0.411794	3.25513e-14
FSTL1	0.00676997	6.90817e-12	1.75219e-05	0.0193137	0.017348	0.141063	0.465191	0.703988	0.941811	0.0275609	0.107916	0.936045	0.165336	0.107994	0.182241	3.32559e-14
NELFCD	0.00143494	3.76873e-17	0.0949966	0.0150383	0.544888	0.0361811	0.0244995	0.535957	0.789088	0.7166	0.0687113	0.849525	0.731329	0.329887	0.715742	3.4642e-14
ZNF423	3.23578e-05	2.61252e-10	0.000357491	0.00849806	0.0158481	0.128667	0.19874	0.555311	0.979387	0.0540994	0.150811	0.584647	0.306356	0.0942792	0.158053	3.68391e-14
ZEB1	1.17207e-05	2.49702e-12	0.00215197	0.0207663	0.0791998	0.0483302	0.119201	0.79044	0.395263	0.212337	0.0675519	0.95639	0.805575	0.149158	0.406213	3.72106e-14
ADRB2	1.54719e-09	7.48037e-13	0.137923	0.0148458	0.390294	0.723882	0.0966575	0.238423	0.71829	0.433353	0.770754	0.815411	0.813894	0.127764	0.398833	3.72912e-14
SIM2	4.6715e-09	5.69602e-12	0.0123779	0.222794	0.178409	0.259749	0.0486734	0.816343	0.332174	0.131306	0.529619	0.957846	0.263574	0.239671	0.663899	3.73381e-14
GRHL1	1.02937e-05	3.96242e-15	0.387738	0.0386764	0.323314	0.261118	0.0328215	0.619064	0.155267	0.841407	0.0253345	0.787764	0.939438	0.0918638	0.533988	3.74985e-14
FADS1	2.50249e-07	2.67716e-09	0.000312681	0.0261548	0.00596407	0.845741	0.229182	0.721761	0.998098	0.0403154	0.241242	0.659098	0.200933	0.0977463	0.221359	3.77529e-14
NR2F1	2.84788e-09	1.26349e-09	0.00874529	0.00280424	0.0428344	0.561354	0.394373	0.494277	0.663451	0.135996	0.674176	0.640635	0.731069	0.0463736	0.245265	3.93454e-14
TCEAL2	3.03251e-05	2.92403e-11	0.00515226	0.0136156	0.0427203	0.0373494	0.0481287	0.651001	0.330315	0.170984	0.0315117	0.943296	0.940479	0.0799109	0.352726	4.0351e-14
ZNF311	2.73121e-07	3.95967e-13	0.0126474	0.0134571	0.212144	0.550918	0.170669	0.0886497	0.894916	0.372412	0.436754	0.82251	0.580326	0.136947	0.48856	4.32792e-14
FGF10	7.72985e-06	2.83313e-10	0.0026954	0.034614	0.14778	0.018679	0.138901	0.676182	0.385996	0.0885523	0.0255532	0.737225	0.844484	0.0610486	0.0862123	4.3348e-14
FGF14	8.80917e-06	1.48681e-09	0.000244129	0.0193849	0.0150717	0.142308	0.0459974	0.377652	0.95607	0.06717	0.108152	0.889114	0.492283	0.0659283	0.336506	4.4276e-14
S1PR2	0.00103213	8.21225e-15	0.0136122	0.0119879	0.0509424	0.805729	0.180075	0.474318	0.799795	0.112663	0.125668	0.51035	0.452173	0.0626613	0.19656	4.43467e-14
FGFR1	2.25884e-05	9.43791e-11	0.000631972	0.0085238	0.00769585	0.169721	0.132475	0.833676	0.625744	0.138149	0.137348	0.832034	0.367914	0.0529234	0.504619	4.53995e-14
ZNF256	5.14131e-10	6.56397e-10	0.00618927	0.0440641	0.257377	0.821846	0.24213	0.691457	0.509556	0.0669043	0.598794	0.521292	0.766969	0.065176	0.0946383	4.61271e-14
TSC22D3	4.97113e-06	1.12627e-15	0.0768607	0.00664761	0.206315	0.76973	0.107722	0.456513	0.687431	0.595046	0.439657	0.91054	0.735965	0.116998	0.534423	4.70653e-14
EPHA4	1.01126e-08	9.98723e-11	0.00355039	0.07272	0.038292	0.468584	0.178926	0.785373	0.5655	0.0409011	0.81906	0.43683	0.906214	0.337673	0.101573	4.72335e-14
CNKSR2	6.67045e-06	2.7819e-11	0.00674231	0.0367957	0.0772519	0.0235406	0.0425308	0.762861	0.363637	0.23213	0.0250285	0.889699	0.902516	0.0999767	0.370128	4.754e-14
ADCYAP1R1	0.000194257	2.35482e-13	0.0166803	0.00979532	0.200335	0.0882511	0.0387957	0.395773	0.554247	0.283924	0.0444048	0.967108	0.445063	0.0416684	0.698164	4.9068e-14
GLRB	2.13225e-05	4.1263e-12	0.000982286	0.0186531	0.0690435	0.0864302	0.136372	0.48791	0.970365	0.12649	0.104196	0.839506	0.61749	0.1792	0.233892	4.91415e-14
PCSK9	3.29257e-07	5.27458e-14	0.261591	0.0133974	0.182992	0.161705	0.0448987	0.324183	0.405299	0.797323	0.389165	0.824304	0.788593	0.128544	0.673839	5.0817e-14
SETDB1	0.00621915	2.33077e-15	0.0307153	0.00125237	0.337105	0.147258	0.0871007	0.188951	0.663268	0.297893	0.171014	0.990157	0.704498	0.0695594	0.260213	5.26818e-14
PTGIR	0.000102298	1.03333e-10	0.00306714	0.000339739	0.0320726	0.711914	0.381771	0.503763	0.768048	0.0431287	0.185011	0.783878	0.340048	0.0358295	0.0702896	5.36686e-14
PLA2G4C	2.94868e-05	5.9948e-14	0.0987553	0.00360785	0.0811312	0.799525	0.192802	0.56498	0.325773	0.445813	0.0470784	0.564725	0.951126	0.0328447	0.376483	5.43224e-14
LYL1	2.24705e-07	2.33187e-11	0.0281291	0.00976133	0.0876633	0.958773	0.163957	0.139985	0.76433	0.145951	0.228759	0.652534	0.61276	0.0533267	0.134202	5.44442e-14
RIN3	4.11519e-06	7.23718e-13	0.0207288	0.00263559	0.0501175	0.529132	0.333003	0.582237	0.337313	0.33185	0.300548	0.891294	0.484848	0.0235213	0.717139	5.49686e-14
PLEKHG2	5.01586e-07	1.19588e-10	0.000344265	0.0374076	0.0154137	0.292733	0.419108	0.88239	0.759562	0.0545321	0.400331	0.666086	0.440353	0.0941239	0.357629	5.61989e-14
NPR1	5.36933e-06	1.80468e-13	0.02925	0.00400584	0.092771	0.389019	0.166492	0.696475	0.631529	0.403298	0.305974	0.68856	0.421212	0.0488868	0.409926	5.707e-14
ARHGEF5	1.56922e-05	8.05223e-12	0.0859587	0.0437529	0.00315497	0.973204	0.014049	0.739675	0.290699	0.0956657	0.209207	0.847005	0.215418	0.0756864	0.179723	5.78467e-14
ITGA9	9.72719e-06	2.94885e-12	0.00263266	0.0404929	0.0562725	0.141947	0.188289	0.905764	0.257447	0.149608	0.108065	0.760675	0.802737	0.0573752	0.362399	5.80918e-14
SPARCL1	2.68234e-05	2.78211e-12	0.00899098	0.00864574	0.0712174	0.0553964	0.10109	0.787062	0.369464	0.302635	0.0547145	0.929861	0.994331	0.0474479	0.469726	6.00324e-14
TGM2	2.33505e-06	4.92305e-07	0.000363731	0.00258157	0.000566939	0.302695	0.829946	0.331843	0.893492	0.0449951	0.141568	0.593459	0.648838	0.0133404	0.15436	6.01719e-14
PLXNA4	4.16696e-06	4.19455e-08	0.000828087	0.0118163	0.0232961	0.055314	0.237201	0.809646	0.42355	0.0323833	0.0581099	0.636281	0.902917	0.023884	0.0518663	6.21807e-14
ELMO1	4.32798e-07	2.49737e-13	0.0310195	0.00994734	0.142781	0.819612	0.22332	0.69318	0.54278	0.24835	0.232474	0.49051	0.751201	0.129494	0.270819	6.31082e-14
ZNF257	1.00171e-06	5.8396e-12	0.00438916	0.150007	0.265836	0.174479	0.0263657	0.782676	0.316362	0.0702486	0.119393	0.734359	0.718801	0.152251	0.316257	6.39059e-14
ADCY2	1.22562e-05	2.4475e-10	0.000778069	0.018375	0.0256212	0.0429844	0.0910221	0.638015	0.574241	0.156463	0.0424879	0.946842	0.597831	0.111297	0.392775	6.60109e-14
GRHL3	0.00740839	3.72912e-15	0.114254	0.329567	0.345472	0.0104582	0.0948587	0.990057	0.089009	0.392688	0.000459064	0.284828	0.908479	0.318124	0.56751	6.71044e-14
PRKG1	6.12806e-05	1.13607e-12	0.0017796	0.0261713	0.128207	0.0303021	0.154926	0.743584	0.494875	0.248553	0.044304	0.961911	0.798244	0.10481	0.432539	6.9219e-14
GGCT	6.76297e-06	9.59805e-15	0.0546435	0.00864084	0.153324	0.328456	0.109037	0.647318	0.527695	0.460158	0.190028	0.766575	0.750915	0.158768	0.628204	7.18324e-14
SFMBT1	2.71376e-07	2.1644e-10	0.0135897	0.00529726	0.109471	0.482901	0.166523	0.0788042	0.419365	0.14222	0.366705	0.784603	0.355308	0.0302257	0.537375	7.21991e-14
EMX1	3.39685e-11	5.33286e-07	0.0165653	0.020179	0.00570885	0.604685	0.226279	0.66352	0.227939	0.0390142	0.700257	0.971313	0.672767	0.258811	0.0978432	7.8532e-14
AFF3	1.53642e-08	1.07958e-12	0.0967629	0.0268398	0.327592	0.250872	0.100848	0.525627	0.503792	0.348842	0.337708	0.81664	0.754698	0.191504	0.248939	7.92621e-14
SYDE1	0.000156519	2.19254e-10	0.000278146	0.00217684	0.00540373	0.5578	0.491072	0.52165	0.883809	0.0426289	0.279637	0.890309	0.286453	0.0293074	0.263054	8.0226e-14
RAP1A	0.000257474	2.16246e-14	0.24507	0.0170782	0.504774	0.0179602	0.00840565	0.395039	0.20016	0.774135	0.0210595	0.975518	0.970594	0.189626	0.810002	8.03337e-14
SMOC2	6.99932e-06	2.65756e-08	0.000514111	0.0323036	0.00336754	0.147618	0.0446056	0.660616	0.570779	0.0237463	0.0879402	0.782167	0.917086	0.0382856	0.225604	8.05729e-14
SH3BP5	1.85036e-06	4.68861e-14	0.146855	0.000980935	0.394572	0.250604	0.184228	0.552942	0.691316	0.683738	0.341961	0.620866	0.602149	0.0905091	0.492182	8.14587e-14
CRYAB	2.68605e-05	1.20388e-11	0.00888498	0.00359443	0.0556364	0.130769	0.103592	0.390206	0.547364	0.177747	0.155763	0.902698	0.512241	0.0381868	0.425859	8.28155e-14
CDH1	5.73482e-06	1.6197e-12	0.0496477	0.0494321	0.0200619	0.175989	0.022918	0.787671	0.306083	0.400506	0.128108	0.508908	0.46573	0.0730958	0.89793	8.44697e-14
FGF2	0.00361828	1.9052e-13	0.015898	0.0221986	0.221365	0.00652541	0.0265219	0.60504	0.573691	0.33499	0.00418442	0.910723	0.774765	0.168376	0.666273	8.52145e-14
ARHGAP15	0.000144472	2.71147e-15	0.0241379	0.0934677	0.270328	0.370565	0.0414092	0.648005	0.382449	0.217877	0.0927355	0.633876	0.515279	0.0972329	0.618709	8.5539e-14
RAB31	0.0293077	2.00508e-12	1.73053e-05	0.0508125	0.0429291	0.138932	0.291105	0.790179	0.824341	0.0271519	0.0653886	0.987912	0.234511	0.0434711	0.349069	8.6288e-14
ELF3	2.59851e-05	5.32643e-13	0.0165526	0.102698	0.0650675	0.048227	0.0337849	0.972686	0.23412	0.26565	0.0637638	0.724806	0.544408	0.112357	0.85538	8.63143e-14
PTPRD	7.92681e-07	7.63502e-10	0.0010815	0.00338413	0.0377084	0.320893	0.427974	0.533571	0.843402	0.0145876	0.638062	0.542696	0.236848	0.134415	0.463818	9.002e-14
CCND2	0.00554538	2.80991e-09	0.102094	0.208733	0.0488263	0.000459045	0.0579872	0.430422	0.00733624	0.368812	0.000162676	0.30483	0.531423	0.0656288	0.455015	9.19338e-14
RAB34	2.86461e-05	5.06288e-07	6.0422e-05	0.00376991	0.000451486	0.821084	0.161902	0.352878	0.985788	0.0106263	0.0884271	0.959185	0.372228	0.0488808	0.354015	9.28243e-14
RCOR2	0.00188288	8.82229e-17	0.0427826	0.0260496	0.409152	0.159341	0.0568554	0.36786	0.381736	0.356094	0.172165	0.813397	0.718326	0.213832	0.546022	9.32935e-14
TSHZ2	2.15976e-07	4.00861e-09	0.00183697	0.00822092	0.0259708	0.0691012	0.320514	0.331193	0.783446	0.157239	0.110845	0.657624	0.500194	0.147037	0.250281	9.48626e-14
ARHGEF16	7.10423e-06	3.80974e-12	0.00432557	0.128569	0.0657495	0.0879661	0.0172766	0.812668	0.267177	0.108094	0.16788	0.965874	0.398046	0.282869	0.641326	9.51552e-14
ZNF835	5.4033e-07	1.16535e-12	0.0742703	0.00167741	0.0671802	0.247942	0.117387	0.594798	0.527888	0.322053	0.314055	0.85072	0.986972	0.199347	0.509643	9.5551e-14
QKI	4.14886e-06	1.77698e-12	0.00161338	0.0918668	0.133808	0.0605263	0.10608	0.756914	0.629897	0.0846101	0.177676	0.849235	0.584704	0.312448	0.412751	9.83049e-14
MN1	1.26408e-06	4.97418e-09	0.000461537	0.0111559	0.00907078	0.130541	0.290513	0.710841	0.764605	0.0590447	0.270852	0.489562	0.581166	0.0915862	0.171757	9.87258e-14
MAPRE2	1.45245e-06	2.83246e-14	0.147327	0.00354173	0.266796	0.234601	0.102109	0.780243	0.414734	0.764225	0.563431	0.859451	0.589169	0.0506096	0.889125	9.91384e-14
CAND2	3.06154e-07	3.71251e-11	0.0111711	0.010708	0.0364062	0.162477	0.0957208	0.708381	0.500737	0.300618	0.142207	0.853872	0.845229	0.126595	0.415547	1.00495e-13
ING5	0.00743121	2.62454e-12	5.46084e-05	0.0440625	0.120041	0.767817	0.228849	0.222599	0.890259	0.0130415	0.108942	0.600667	0.346624	0.0702738	0.109396	1.01007e-13
CHD7	0.00202267	8.39661e-16	0.126134	0.000350578	0.132646	0.950777	0.0987624	0.078739	0.855103	0.624171	0.247254	0.891255	0.708783	0.126783	0.579373	1.01879e-13
FYN	3.67853e-11	8.4544e-08	0.0244873	0.00478886	0.00998429	0.955701	0.132073	0.751772	0.602613	0.316178	0.651061	0.816608	0.213793	0.076866	0.795327	1.03013e-13
LRRN2	1.37855e-08	5.68211e-09	0.000533498	0.0333858	0.0125498	0.725199	0.141096	0.897605	0.838502	0.0748291	0.542187	0.615628	0.362394	0.122444	0.331791	1.09713e-13
ZNF300	3.63286e-13	2.15102e-07	0.0294763	0.00766118	0.151821	0.897717	0.465677	0.115141	0.92367	0.2451	0.954116	0.564086	0.581031	0.304951	0.179628	1.10448e-13
ADGRB3	0.000783118	2.53278e-12	0.00537376	0.0346239	0.0935228	0.0135163	0.0490707	0.654436	0.400597	0.236318	0.0138128	0.937809	0.717919	0.0736175	0.521531	1.11531e-13
CERS5	6.91593e-09	1.00525e-06	0.000888041	0.106927	0.00576034	0.380181	0.0356794	0.39573	0.977326	0.0101954	0.430203	0.832647	0.156851	0.270354	0.166049	1.12671e-13
NPR3	1.78686e-05	9.95519e-09	0.000726268	0.00808813	0.00757229	0.0856855	0.187096	0.215538	0.432865	0.0877495	0.210621	0.574159	0.153513	0.281928	0.0969672	1.15071e-13
AGTR1	0.000459639	4.21299e-11	0.00169388	0.0359963	0.0455689	0.0152903	0.0608185	0.70664	0.407417	0.135542	0.00899274	0.95461	0.926928	0.0772952	0.450151	1.17373e-13
LMCD1	8.16889e-05	5.03383e-10	8.36187e-05	0.0108046	0.00535261	0.894535	0.488224	0.482163	0.849023	0.0119848	0.445949	0.732301	0.14414	0.188448	0.149735	1.21655e-13
RELN	6.03988e-05	2.97344e-13	0.00771395	0.0319159	0.174589	0.141877	0.0944905	0.251925	0.750837	0.227259	0.136574	0.857368	0.571738	0.0603664	0.34076	1.29427e-13
AEBP1	0.0171746	1.6306e-09	1.14826e-05	0.00864306	0.0024352	0.545683	0.645676	0.589464	0.802185	0.00617478	0.228322	0.859272	0.136518	0.0755243	0.046589	1.36555e-13
GLI3	0.00147399	4.34098e-12	0.000171473	0.0161338	0.013056	0.177567	0.276845	0.774999	0.825435	0.0812286	0.136391	0.91045	0.209055	0.149263	0.288707	1.37245e-13
GRIN2D	3.21048e-07	9.07275e-13	0.237063	0.0202905	0.058384	0.963462	0.0149862	0.617363	0.241155	0.261815	0.914097	0.980871	0.839004	0.139841	0.136908	1.37671e-13
CD40	0.000102244	1.12003e-12	0.0069551	0.0224137	0.107448	0.560637	0.0801172	0.394933	0.751866	0.0275844	0.106116	0.68374	0.238016	0.129057	0.472077	1.50381e-13
ADCYAP1	3.73086e-05	2.25044e-11	0.00405242	0.0260635	0.330292	0.0556719	0.0683367	0.810208	0.135293	0.170327	0.0531182	0.791304	0.818981	0.0373676	0.287433	1.5459e-13
NPAS3	3.08976e-07	1.96542e-10	0.00556651	0.0231109	0.0524197	0.0897638	0.0690124	0.586324	0.536569	0.143371	0.135169	0.876053	0.848373	0.181325	0.370819	1.55171e-13
CEBPG	5.01853e-07	8.96573e-13	0.184581	0.0032491	0.0145751	0.594832	0.100861	0.586932	0.638615	0.439688	0.534987	0.670042	0.850974	0.12621	0.564022	1.66257e-13
MEOX1	1.24804e-05	1.02852e-12	0.0640647	0.0145721	0.553657	0.197442	0.136186	0.522629	0.380962	0.279272	0.0650996	0.717013	0.653771	0.0201029	0.142048	1.69316e-13
ZNF71	5.44161e-07	8.59153e-10	0.0518264	0.00542505	0.00370517	0.807143	0.0684081	0.795805	0.115916	0.207195	0.160769	0.726655	0.928474	0.02852	0.548664	1.70531e-13
PLCL1	9.2949e-07	5.49521e-12	0.00158543	0.100109	0.18103	0.0902363	0.126731	0.656427	0.509447	0.187548	0.199383	0.79186	0.491383	0.236547	0.472133	1.76543e-13
SH3BGRL	6.51722e-05	1.36077e-15	0.0526285	0.0395698	0.538102	0.0590377	0.0409289	0.346053	0.564346	0.627237	0.129125	0.942121	0.816754	0.427645	0.761492	1.82513e-13
HEYL	3.14229e-05	1.84074e-09	5.38844e-05	0.0242347	0.00918453	0.241979	0.353237	0.83563	0.745585	0.0620452	0.113971	0.776669	0.193812	0.0977159	0.254646	1.86499e-13
DKK1	3.09717e-10	0.0888221	0.0514258	0.011987	0.00688355	0.0483971	0.817758	0.00347227	0.00757317	0.0599289	0.135482	0.105545	0.299625	0.676157	0.0473921	1.89617e-13
GNAI2	0.000205331	1.58427e-10	0.00710395	0.00461145	0.0119441	0.991442	0.10651	0.175632	0.91198	0.052131	0.151232	0.669968	0.284547	0.0106366	0.300949	1.94948e-13
DDAH1	1.74498e-10	1.13984e-08	0.0478155	0.124646	0.00139306	0.84802	0.12469	0.604964	0.914725	0.0972991	0.834115	0.408084	0.273337	0.230146	0.524151	1.97798e-13
TUSC3	4.63228e-06	1.68921e-09	0.00119635	0.0314623	0.0261905	0.25898	0.0286602	0.53787	0.769736	0.12634	0.0684204	0.917101	0.149353	0.104179	0.364386	1.99287e-13
SHC4	9.65328e-05	9.03562e-09	3.41048e-05	0.0810464	0.00940155	0.0418168	0.267773	0.863445	0.745015	0.0500535	0.0394823	0.742873	0.234492	0.0904851	0.209762	1.99483e-13
GPR162	0.00137262	6.19194e-08	2.35407e-05	0.00288174	0.000970744	0.684762	0.621944	0.609036	0.780995	0.00443447	0.305333	0.739478	0.103969	0.0593084	0.159033	2.06214e-13
RHPN1	0.000371158	3.42613e-15	0.0791818	0.0540897	0.609819	0.0640092	0.0244787	0.568851	0.300993	0.571884	0.0871443	0.861575	0.335732	0.0900614	0.998054	2.12151e-13
TBC1D30	8.92167e-09	6.90713e-11	0.176632	0.0156681	0.331086	0.134083	0.0378438	0.268603	0.284278	0.409578	0.396183	0.783068	0.938204	0.0979037	0.454797	2.13113e-13
ZC3H10	4.16496e-06	1.81172e-08	0.00141483	0.00387104	0.00198587	0.647566	0.174894	0.40579	0.625434	0.0698599	0.0957431	0.847847	0.327383	0.0276066	0.963041	2.13556e-13
MORF4L1	0.00367473	2.06716e-10	0.00485365	0.00931238	0.0288992	0.00793297	0.0103499	0.408164	0.594952	0.163603	0.00756307	0.93031	0.579703	0.175004	0.507892	2.14841e-13
RBPMS	1.09172e-07	9.48481e-11	0.0302689	0.00747118	0.0446486	0.20312	0.140131	0.42624	0.648442	0.262784	0.330819	0.791992	0.861245	0.0497296	0.489276	2.16742e-13
PKIG	2.24101e-10	1.13741e-08	0.0176491	0.0082872	0.0468449	0.794592	0.296267	0.13378	0.698763	0.250217	0.674584	0.809368	0.768386	0.037063	0.826929	2.23784e-13
SOX10	0.000180318	3.49601e-11	0.0202701	0.0104915	0.0424763	0.0350259	0.0549269	0.611778	0.23407	0.268337	0.0176482	0.93671	0.933003	0.0449437	0.425419	2.24479e-13
TCF4	8.93971e-08	4.76131e-11	0.00176388	0.0263705	0.08278	0.327206	0.298083	0.915481	0.613736	0.284224	0.23897	0.764415	0.45909	0.215797	0.271101	2.26029e-13
SPOP	0.00199415	7.15162e-13	0.107354	0.00298315	0.100272	0.0255197	0.0203423	0.622662	0.383495	0.46495	0.0135834	0.774673	0.840507	0.0806689	0.680967	2.30228e-13
TGFBR2	5.29677e-11	7.76425e-10	0.0286082	0.0227303	0.0918524	0.891067	0.573188	0.56973	0.30741	0.469044	0.383432	0.854689	0.757957	0.105219	0.476109	2.30236e-13
CIAO1	3.93974e-05	6.89515e-15	0.0162002	0.0546507	0.575099	0.0366403	0.168559	0.423958	0.619989	0.230795	0.13494	0.929511	0.917217	0.539401	0.40914	2.3487e-13
PBX3	0.000154854	2.34754e-12	0.0132241	0.0228584	0.0260499	0.0441711	0.0548898	0.864358	0.299278	0.261776	0.0499294	0.782108	0.999062	0.0930008	0.824286	2.47264e-13
CAMK1	2.06447e-06	1.0629e-09	0.0143885	0.00120246	0.0261218	0.784788	0.103406	0.16884	0.453559	0.179875	0.235136	0.884223	0.635779	0.0142698	0.684273	2.50714e-13
MAGI2	0.000113931	2.06857e-11	0.000961482	0.0203448	0.0226821	0.0552687	0.0782054	0.690008	0.888214	0.133019	0.10835	0.969747	0.499471	0.134878	0.550533	2.51396e-13
PPP2R2B	0.000146076	8.2134e-14	0.00653794	0.0130559	0.110551	0.310969	0.147586	0.521336	0.671434	0.118067	0.255863	0.589989	0.766888	0.140912	0.414755	2.53717e-13
TSHZ3	0.000220073	1.49973e-12	0.00181506	0.00839299	0.0180002	0.238266	0.202526	0.887638	0.718221	0.192041	0.163019	0.855359	0.37011	0.0856665	0.63298	2.59587e-13
HOXA13	4.12673e-10	2.02503e-07	0.304294	0.00507109	0.00882022	0.0952375	0.386179	0.381025	0.348776	0.184497	0.254219	0.605198	0.810572	0.0705747	0.177231	2.73459e-13
CERS6	3.47431e-05	3.31387e-09	0.00567192	0.003607	0.00908338	0.779382	0.0760177	0.141461	0.755256	0.0327162	0.371587	0.688707	0.14229	0.0427984	0.240073	2.81124e-13
HACD3	2.34237e-07	6.04216e-10	0.00754829	0.100928	0.0262424	0.211112	0.0185856	0.569395	0.614147	0.0964575	0.392751	0.541422	0.506885	0.0732249	0.595931	2.94682e-13
DPYSL5	1.11123e-06	4.78127e-08	0.00026437	0.0202789	0.00190482	0.546395	0.329936	0.945084	0.461804	0.0102737	0.473535	0.49971	0.26047	0.282529	0.237534	3.01525e-13
RHOQ	1.8489e-05	5.16632e-13	0.0841802	0.0060239	0.142121	0.21071	0.0222333	0.643673	0.399901	0.551973	0.228191	0.983955	0.603089	0.0365672	0.808603	3.0417e-13
IDH1	8.1241e-07	1.31595e-11	0.0440999	0.0351548	0.0190558	0.0593271	0.0963194	0.739415	0.365469	0.337566	0.14988	0.427372	0.60342	0.334901	0.880201	3.09467e-13
CNIH3	0.00461937	0.000211816	1.28957e-06	0.148927	0.0010158	0.507139	0.500468	0.157175	0.103085	0.000347818	0.322242	0.170602	0.0284164	0.461205	0.00983498	3.16982e-13
BDKRB1	1.67934e-05	3.80216e-09	0.000233573	0.0901645	0.0589923	0.434485	0.0533468	0.425056	0.92063	0.00812984	0.856954	0.690674	0.0422846	0.0733091	0.182002	3.19349e-13
ZNF677	1.48898e-07	1.69122e-11	0.00651391	0.0273568	0.148594	0.180911	0.144569	0.463132	0.779583	0.185674	0.311652	0.865327	0.827019	0.236054	0.328989	3.28415e-13
LGALS1	0.00492842	8.25875e-11	0.00160378	0.00830428	0.0230757	0.326175	0.0775863	0.151898	0.917082	0.0266519	0.13174	0.929246	0.14156	0.04071	0.24544	3.29693e-13
RGS2	0.000104521	3.44245e-15	0.0374223	0.147581	0.493281	0.153391	0.0135458	0.408903	0.51429	0.280588	0.423303	0.936158	0.606502	0.0916324	0.769218	3.29795e-13
APH1B	3.73451e-09	1.87323e-09	0.00645188	0.290154	0.103381	0.377485	0.0552447	0.241873	0.989767	0.0454026	0.551954	0.900516	0.231704	0.206897	0.280735	3.31919e-13
LRRN3	4.52761e-09	1.0421e-08	0.00354478	0.0137949	0.0436145	0.0687141	0.510411	0.397289	0.737745	0.0837374	0.148225	0.992693	0.987197	0.691496	0.236488	3.32516e-13
THBS1	0.0289381	1.05659e-10	4.48723e-06	0.0907319	0.0151633	0.244443	0.282287	0.893384	0.99808	0.00864307	0.235955	0.887645	0.0689104	0.180944	0.0785126	3.32593e-13
LRPPRC	1.54647e-08	1.43547e-09	0.0100058	0.0072627	0.0622092	0.944248	0.460448	0.0594063	0.961398	0.0642586	0.681927	0.71163	0.667909	0.160999	0.249559	3.35997e-13
SETBP1	1.51287e-07	1.05895e-11	0.018102	0.0498516	0.151758	0.0922828	0.0856753	0.776046	0.417677	0.433257	0.151259	0.938583	0.882287	0.137326	0.507256	3.41017e-13
ZNF135	6.25122e-07	1.70612e-12	0.0234921	0.0159432	0.120053	0.17318	0.116019	0.596061	0.566426	0.523471	0.213997	0.924542	0.592579	0.137955	0.775761	3.42409e-13
EID1	8.69877e-06	1.49543e-12	0.0612332	0.0212048	0.0469314	0.19894	0.011659	0.471878	0.566372	0.42847	0.170301	0.967904	0.33913	0.214809	0.852837	3.44822e-13
RAB23	0.0128284	1.18562e-12	0.00425892	0.0120818	0.073674	0.0131442	0.0208649	0.698506	0.486392	0.313758	0.0133912	0.829885	0.640244	0.230906	0.807331	3.54677e-13
TREML1	1.28919e-05	3.48656e-15	0.0943092	0.097891	0.16429	0.258558	0.142384	0.22965	0.829407	0.47343	0.316394	0.731037	0.883208	0.0891336	0.555952	3.61464e-13
ZNF217	0.0122305	1.26045e-13	0.126275	0.00165503	0.191149	0.129596	0.0054781	0.394017	0.533773	0.438616	0.0306838	0.734578	0.571651	0.0477961	0.92729	3.62947e-13
GHR	6.47712e-06	1.31419e-12	0.00506657	0.0221463	0.109817	0.210285	0.100432	0.42981	0.945676	0.326421	0.26093	0.851443	0.429493	0.205372	0.400008	3.63024e-13
PDE7B	9.9924e-07	6.38245e-12	0.00696522	0.0139176	0.198499	0.160789	0.286012	0.674625	0.564718	0.203282	0.185338	0.838021	0.637797	0.145722	0.368322	3.6547e-13
GUCY1B1	8.17996e-05	4.67659e-12	0.000497195	0.0428476	0.0756064	0.126725	0.130386	0.755903	0.51078	0.173305	0.139265	0.967583	0.510355	0.109722	0.481262	3.83655e-13
KDM4C	3.68357e-06	7.70938e-08	0.000210935	0.0148372	0.0191587	0.658305	0.479	0.479331	0.848529	0.0267303	0.197777	0.748474	0.119281	0.0310067	0.0778841	3.85495e-13
TCF7L1	1.37911e-08	8.64168e-09	0.014533	0.00829626	0.0238984	0.281763	0.100349	0.554552	0.690621	0.204118	0.306931	0.667237	0.749227	0.0728691	0.293329	3.85526e-13
MPP1	0.00308918	3.17823e-13	0.00219978	0.0390548	0.254115	0.497943	0.182097	0.699467	0.367609	0.0755296	0.0492139	0.623983	0.409768	0.0105304	0.500994	3.87492e-13
ARHGEF33	4.52161e-08	4.8423e-10	0.0866886	0.0158247	0.0651385	0.0832581	0.0478988	0.706106	0.31256	0.256749	0.16651	0.769168	0.736074	0.239734	0.262993	4.02057e-13
DNAJB6	0.00108039	1.19707e-10	0.0029591	0.00876935	0.0223492	0.0212092	0.0385917	0.726636	0.514365	0.137724	0.0323652	0.849728	0.798186	0.0713052	0.535168	4.04351e-13
CBX6	3.04983e-10	1.63643e-08	0.0257771	0.00767575	0.013312	0.67375	0.485342	0.695143	0.464123	0.214926	0.59852	0.489345	0.915899	0.0909229	0.364926	4.05039e-13
GNAO1	1.32486e-06	1.63252e-10	0.0179166	0.0275361	0.0419796	0.083273	0.0758906	0.692418	0.251879	0.263471	0.0787015	0.863806	0.630892	0.14743	0.325265	4.0769e-13
HEY1	0.000485366	1.95514e-11	0.00112212	0.00632039	0.0100304	0.382553	0.491059	0.469808	0.906859	0.0916994	0.229039	0.825106	0.292656	0.0372229	0.265384	4.11405e-13
NCSTN	0.00705756	9.38945e-14	0.115288	0.384429	0.365703	0.00151477	0.00362183	0.760541	0.197851	0.798534	0.00587482	0.305163	0.96022	0.322013	0.711234	4.21351e-13
ZNF781	2.33804e-05	1.57083e-13	0.0503415	0.0749388	0.198467	0.0596583	0.0234703	0.599688	0.28878	0.548081	0.0778135	0.860056	0.753507	0.183864	0.827511	4.22807e-13
SOX2	2.11468e-15	0.00334828	0.140955	0.0222465	0.288757	0.0305166	0.660249	0.121305	0.722672	0.27294	0.104816	0.513174	0.495245	0.563392	0.0649295	4.46926e-13
VLDLR	6.28242e-05	8.17439e-15	0.0197188	0.0300717	0.067852	0.365927	0.131848	0.774576	0.889733	0.297937	0.635061	0.884612	0.225115	0.125797	0.927154	4.47772e-13
SSTR2	5.05049e-08	2.24122e-10	0.0365319	0.0235206	0.0428337	0.449166	0.134385	0.49532	0.616433	0.34563	0.356244	0.761413	0.738373	0.0155376	0.380314	4.61683e-13
TGFB1	0.000488483	2.03343e-09	0.00142409	0.00165368	0.00467288	0.529613	0.43815	0.124487	0.423732	0.0433174	0.335937	0.534588	0.21667	0.13115	0.106257	4.61911e-13
HOXB2	3.64845e-05	1.09091e-11	0.0169207	0.0162367	0.0901087	0.152642	0.057223	0.165385	0.381123	0.052632	0.472141	0.714862	0.507877	0.39404	0.163208	4.62458e-13
GPR182	3.07752e-06	1.9404e-11	0.0039481	0.0314644	0.16505	0.165299	0.166686	0.152283	0.975531	0.139806	0.135665	0.711057	0.375049	0.209224	0.610618	4.72783e-13
FRY	2.0892e-07	1.01276e-11	0.00609751	0.0182569	0.0947628	0.388828	0.172801	0.654511	0.734698	0.301944	0.309453	0.830371	0.658704	0.196559	0.459072	4.82621e-13
DIRAS3	5.81418e-06	5.40958e-11	0.000975973	0.0166319	0.339402	0.204085	0.123387	0.235885	0.648167	0.0994411	0.46422	0.811367	0.357148	0.13823	0.273812	4.88458e-13
RADIL	4.27915e-06	2.10082e-08	0.00100498	0.0155359	0.00936295	0.204449	0.079494	0.662754	0.954372	0.0330312	0.186083	0.421898	0.300856	0.156651	0.218566	5.1415e-13
CDH2	0.000123296	6.65043e-08	1.92447e-05	0.0334038	0.000957135	0.81849	0.339109	0.702627	0.934746	0.00393336	0.237575	0.718314	0.124231	0.144907	0.325726	5.15387e-13
NR4A3	0.000316696	5.20746e-13	0.00158218	0.0627136	0.0457257	0.773657	0.130148	0.859731	0.456846	0.0977365	0.313664	0.521532	0.55648	0.0257937	0.534739	5.16648e-13
NPAS2	1.04845e-05	1.92028e-12	0.0257989	0.156892	0.0960935	0.0870098	0.0308373	0.715863	0.349765	0.204057	0.0407988	0.737778	0.77394	0.245533	0.592507	5.17408e-13
GMCL1	0.000424508	9.83943e-11	0.00647023	0.00340864	0.184345	0.441905	0.0712668	0.0428732	0.689207	0.0829867	0.265266	0.914299	0.134991	0.0169313	0.521536	5.34195e-13
TBC1D9	1.24804e-09	1.57298e-11	0.0458301	0.0443586	0.264598	0.720354	0.146075	0.426824	0.869041	0.364283	0.783766	0.550169	0.695017	0.221261	0.383583	5.37215e-13
SH2D3C	6.57092e-06	4.87811e-12	0.0413436	0.00421334	0.102817	0.673304	0.228605	0.696085	0.452047	0.323602	0.116598	0.500041	0.413424	0.0403587	0.453921	5.53935e-13
CCDC47	2.17965e-07	1.03364e-07	0.000820264	0.32731	0.0355451	0.0489946	0.158332	0.283558	0.386472	0.0204565	0.155417	0.342803	0.377751	0.147848	0.360691	5.58212e-13
CNTN1	7.8202e-05	1.01446e-10	0.000386828	0.0321909	0.0299201	0.132254	0.089116	0.607805	0.437	0.161113	0.0896681	0.972905	0.664434	0.119063	0.393639	5.62195e-13
ABLIM3	0.00078834	3.90045e-12	0.00267649	0.0151804	0.0744237	0.13781	0.120642	0.492124	0.615872	0.139948	0.332871	0.857367	0.238132	0.0938703	0.1013	5.82239e-13
ZBTB16	9.01238e-07	8.40384e-11	0.0369732	0.0118513	0.0917413	0.15482	0.109298	0.648888	0.210956	0.320497	0.126832	0.892415	0.780054	0.0692784	0.313633	5.92713e-13
ZKSCAN7	2.91287e-11	4.23297e-08	0.0392891	0.088219	0.0466782	0.40802	0.114439	0.300192	0.821409	0.189384	0.309556	0.559004	0.736971	0.395083	0.214556	6.31089e-13
HOXA10	8.64858e-08	7.40078e-13	0.100307	0.0128568	0.18394	0.320449	0.161175	0.321028	0.654578	0.613882	0.383421	0.782851	0.799972	0.328995	0.594333	6.36004e-13
GPR17	4.53334e-08	3.36983e-09	0.0242872	0.0427526	0.0666733	0.0293724	0.0782237	0.411839	0.952764	0.271082	0.126407	0.629306	0.818196	0.105308	0.268109	6.36018e-13
KLHL31	0.0139952	5.51718e-15	0.00877022	0.00680125	0.14991	0.946942	0.147696	0.618997	0.926515	0.297975	0.111827	0.510822	0.626777	0.0244236	0.335588	6.45619e-13
ECEL1	1.77034e-06	9.35891e-05	1.47038e-05	0.0717122	0.00026288	0.819347	0.0906338	0.976116	0.696244	0.00660059	0.270102	0.467056	0.421186	0.0450933	0.13292	6.48679e-13
ZNF583	8.50644e-07	5.1055e-12	0.151191	0.0488246	0.0333016	0.573474	0.0299893	0.332497	0.631701	0.402552	0.127655	0.989439	0.693856	0.0991711	0.3779	6.71891e-13
VAV2	0.00905219	3.31757e-15	0.180454	0.00943146	0.611311	0.0815932	0.0030477	0.200309	0.57254	0.522829	0.244276	0.940204	0.263232	0.320579	0.576812	6.83002e-13
ZNF880	1.10937e-07	1.44049e-11	0.0188517	0.0410921	0.131485	0.221946	0.0829003	0.520989	0.797552	0.375345	0.243996	0.815129	0.674095	0.156798	0.544327	6.96804e-13
APBB1	3.53147e-10	2.78723e-08	0.0100952	0.00946295	0.0173445	0.606783	0.334292	0.49202	0.819853	0.137469	0.730943	0.649038	0.909999	0.193909	0.354502	7.06804e-13
JUP	5.96959e-06	4.42294e-13	0.0601692	0.14319	0.0606239	0.150422	0.0422645	0.90106	0.136575	0.297215	0.207451	0.849495	0.69531	0.21066	0.668078	7.15423e-13
ASH2L	5.50824e-13	0.555551	7.31785e-05	0.609806	0.132211	0.124533	0.194731	0.863993	0.699134	0.00192145	0.184159	0.150323	0.391426	0.181761	0.0558305	7.21187e-13
ITGA6	1.95856e-08	8.9565e-08	0.024924	0.00796432	0.0310268	0.869939	0.0360869	0.336593	0.704344	0.0255636	0.436007	0.655408	0.716702	0.0470178	0.288232	7.32881e-13
TNFRSF10D	4.10251e-10	4.26071e-07	0.0577232	0.0264441	0.0119247	0.720407	0.15792	0.244854	0.348715	0.0765108	0.67578	0.351974	0.635666	0.313181	0.0514628	7.38554e-13
CNOT7	6.52376e-12	2.01962e-05	0.00772729	0.0202166	0.0237397	0.250613	0.639717	0.256992	0.657185	0.0955223	0.700927	0.370052	0.942122	0.086199	0.22141	7.5157e-13
BARX1	3.4409e-05	1.87005e-09	0.0130673	0.00449556	0.0228088	0.0846959	0.0869439	0.700205	0.273355	0.206545	0.0537961	0.930611	0.790807	0.0243111	0.253523	7.74177e-13
ITPR3	0.000363514	5.52308e-13	0.0577335	0.0106841	0.0955894	0.124843	0.0129026	0.30251	0.580431	0.314393	0.230377	0.844038	0.259475	0.137306	0.884519	8.05796e-13
NFKBIA	0.000615173	6.75036e-13	0.145504	0.000317922	0.453918	0.682192	0.0541646	0.0570827	0.852339	0.478803	0.322516	0.966806	0.617238	0.00865229	0.535784	8.2947e-13
PDE6B	4.74566e-10	6.29919e-07	0.013902	0.0223128	0.0251464	0.923928	0.0759255	0.516757	0.980078	0.0449895	0.642834	0.277427	0.584714	0.181906	0.0957766	8.36602e-13
RHOJ	0.000147941	9.57608e-13	0.0217543	0.00796246	0.169759	0.195083	0.12724	0.812839	0.427127	0.41038	0.0837903	0.627684	0.408072	0.0566865	0.380683	8.41584e-13
MEIS1	0.000337879	1.37718e-13	0.0654947	0.00941319	0.20343	0.0462841	0.0554012	0.513844	0.412359	0.547558	0.0394323	0.987489	0.856494	0.223348	0.555649	8.75915e-13
ZNF28	0.000844558	1.35695e-11	0.0212268	0.00141674	0.122617	0.896984	0.0626612	0.0433319	0.910402	0.256015	0.141244	0.776794	0.376083	0.0112226	0.658275	8.87796e-13
TERF2IP	2.98446e-05	7.79318e-12	0.190046	0.0036403	0.111641	0.284432	0.0150599	0.0695635	0.768526	0.290837	0.266434	0.818918	0.694646	0.10314	0.393004	8.91342e-13
BMX	0.000396392	1.29282e-12	0.0289799	0.0461659	0.691803	0.016795	0.0355883	0.344414	0.241812	0.294951	0.0317622	0.844248	0.596738	0.14639	0.460312	9.0616e-13
LPAR1	1.46364e-05	4.96168e-14	0.0427554	0.00496093	0.418801	0.350181	0.129897	0.28399	0.865831	0.352322	0.710555	0.684822	0.462395	0.228341	0.576533	9.08105e-13
CBX7	1.63105e-06	1.44744e-12	0.181017	0.0124427	0.121399	0.176665	0.1049	0.483826	0.326886	0.612182	0.174871	0.886088	0.719573	0.120148	0.501055	9.30802e-13
ASXL3	4.66742e-06	7.86238e-12	0.00433407	0.0261515	0.135282	0.126592	0.168256	0.506381	0.804412	0.231017	0.173971	0.759967	0.687293	0.227001	0.336381	9.35499e-13
ASAH2B	1.32967e-06	2.0992e-06	0.00244811	0.00690471	0.0276853	0.242028	0.402036	0.124655	0.141565	0.0456645	0.615063	0.276613	0.83078	0.00645575	0.0862033	9.56744e-13
ARL2BP	0.00992949	1.59814e-13	0.0151258	0.00552954	0.0814617	0.776107	0.0242527	0.0965142	0.670076	0.320318	0.439374	0.885616	0.0616802	0.104353	0.782089	9.75154e-13
RASSF8	5.75996e-05	7.14139e-11	0.00100825	0.0292135	0.0150207	0.0590378	0.13759	0.864558	0.754513	0.184953	0.0842431	0.957998	0.657428	0.206208	0.429881	9.87031e-13
ZNF521	0.000237475	9.38841e-12	0.000511572	0.00566598	0.0968519	0.310472	0.411809	0.709676	0.999437	0.109271	0.302086	0.869745	0.226106	0.0946638	0.243317	9.95917e-13
MPP2	5.15571e-06	2.82755e-09	0.0016455	0.00831228	0.00334253	0.251635	0.269876	0.655761	0.550224	0.0680434	0.143782	0.860267	0.865432	0.185086	0.399152	1.02309e-12
CCN5	0.000683113	2.63155e-12	0.00218406	0.0124336	0.128582	0.336158	0.08339	0.20113	0.844283	0.0974142	0.308595	0.99779	0.147807	0.0940967	0.706705	1.02499e-12
PIP5K1A	0.00199233	1.43069e-12	0.0795681	0.000941021	0.23034	0.132161	0.0749354	0.208128	0.185432	0.610687	0.071096	0.973701	0.516959	0.0349166	0.622902	1.03595e-12
PTGER1	9.4422e-11	5.23967e-08	0.0284252	0.00785678	0.182068	0.554072	0.803608	0.146237	0.910695	0.0695845	0.808633	0.638538	0.884763	0.275715	0.08661	1.04703e-12
ABCG4	6.01767e-06	2.2894e-12	0.0311019	0.0040669	0.0847072	0.270406	0.106929	0.842869	0.651225	0.587609	0.309528	0.768304	0.496914	0.0748913	0.763591	1.06904e-12
FGD1	2.44583e-07	3.75656e-07	0.00236712	0.00561843	0.000341824	0.876951	0.52774	0.726427	0.802463	0.0236498	0.653446	0.231124	0.520396	0.18931	0.234981	1.07032e-12
IRX6	3.96731e-09	8.1313e-10	0.0421551	0.00293026	0.0322256	0.679129	0.120597	0.427095	0.859674	0.393001	0.827719	0.916597	0.248473	0.463347	0.719429	1.08969e-12
ZIK1	9.44332e-09	3.1973e-11	0.023169	0.0551001	0.136991	0.471628	0.119063	0.643599	0.867135	0.282055	0.394752	0.837914	0.746046	0.20685	0.402377	1.09407e-12
RAMP3	1.87831e-05	3.26292e-12	0.0749342	0.00643484	0.272115	0.760979	0.274219	0.292482	0.47593	0.137298	0.340114	0.573669	0.974683	0.0213344	0.0748862	1.10795e-12
PTN	1.12762e-06	9.24358e-10	0.00436259	0.021003	0.130369	0.053083	0.0357282	0.707499	0.640645	0.146992	0.0953782	0.81742	0.985572	0.322977	0.249965	1.10931e-12
SERP2	3.86933e-10	6.71712e-09	0.0170357	0.0446099	0.0912576	0.649585	0.13318	0.231169	0.30587	0.375911	0.753225	0.923922	0.729111	0.0625222	0.747796	1.1157e-12
ZNF287	5.20437e-09	6.43262e-10	0.149908	0.00619919	0.068409	0.312474	0.0398918	0.405901	0.549026	0.628583	0.298895	0.958541	0.830963	0.21211	0.54662	1.15271e-12
ZBTB46	1.36263e-09	1.43208e-07	0.0162283	0.0105066	0.0114869	0.584601	0.94075	0.363367	0.901986	0.0635333	0.596508	0.381073	0.730276	0.193376	0.0749501	1.17625e-12
FGF13	3.27949e-08	3.80156e-11	0.0640308	0.0344815	0.129618	0.49168	0.033415	0.456897	0.747974	0.408662	0.705615	0.853194	0.270195	0.138171	0.625778	1.26004e-12
ZNF853	3.41507e-07	1.1295e-09	0.0146746	0.00534365	0.00776328	0.346098	0.22207	0.602789	0.656987	0.262416	0.271563	0.707345	0.919477	0.0896602	0.396181	1.28133e-12
ERO1A	6.88976e-12	4.98247e-08	0.0704287	0.087431	0.12948	0.769148	0.216254	0.377154	0.181227	0.291774	0.404173	0.777729	0.95053	0.0709402	0.633846	1.31726e-12
ZDHHC13	0.00722937	1.30214e-12	0.0111789	0.00546105	0.0144627	0.395733	0.07701	0.529465	0.795828	0.340774	0.0460333	0.468571	0.654714	0.026048	0.921053	1.32769e-12
OPN4	1.6732e-09	1.34692e-07	0.0419066	0.000533775	0.0148552	0.86086	0.127932	0.158695	0.309511	0.226462	0.959113	0.869153	0.378153	0.482986	0.898024	1.34594e-12
FOXP2	2.1936e-05	9.66322e-10	0.00798728	0.0281066	0.077337	0.0120921	0.0522725	0.860589	0.351081	0.295394	0.0225908	0.964431	0.856414	0.0682914	0.479415	1.35746e-12
GATA1	7.97849e-09	5.02418e-09	0.0143191	0.00717212	0.287932	0.775826	0.131537	0.160815	0.977401	0.188802	0.414413	0.55597	0.2646	0.127428	0.456678	1.36177e-12
GNG7	4.50464e-09	7.20875e-12	0.309368	0.0272883	0.342276	0.8248	0.124033	0.310886	0.601068	0.56878	0.578208	0.851791	0.639211	0.136701	0.292684	1.37129e-12
MAPK13	0.000147974	4.11385e-14	0.0240239	0.0932418	0.512791	0.0264558	0.0287894	0.779381	0.386151	0.506447	0.0881112	0.863834	0.561727	0.452426	0.820157	1.37352e-12
IL1R1	4.0885e-06	1.3402e-13	0.0465351	0.016365	0.380676	0.282166	0.0704916	0.436689	0.932565	0.490688	0.304268	0.92767	0.491946	0.205548	0.717088	1.37715e-12
SMO	1.69556e-08	0.00019064	0.000826969	0.0387952	0.000728463	0.928323	0.197089	0.611739	0.620407	0.014452	0.640459	0.312382	0.15276	0.0989901	0.0563969	1.3782e-12
RTN1	4.22538e-06	1.35843e-12	0.0251173	0.0181447	0.0588132	0.831745	0.216506	0.522651	0.395176	0.451773	0.126764	0.868592	0.665791	0.0768991	0.887875	1.37854e-12
GPR135	4.9305e-05	3.15699e-12	0.084323	0.0334519	0.017982	0.0472312	0.127587	0.868824	0.140777	0.41215	0.0951792	0.412631	0.713263	0.279714	0.693201	1.38575e-12
SLC22A17	1.40552e-07	1.13272e-09	0.0192601	0.00305786	0.0237841	0.667697	0.145953	0.309628	0.911028	0.276504	0.431866	0.789033	0.713341	0.0856505	0.388683	1.4419e-12
ZNF362	4.10578e-10	1.66354e-08	0.144256	0.00240629	0.0190572	0.922882	0.690116	0.154838	0.597483	0.191076	0.763158	0.663464	0.823506	0.196746	0.330394	1.4476e-12
ROR1	1.38117e-09	3.04495e-10	0.090452	0.00436686	0.051325	0.626698	0.226194	0.317627	0.924776	0.534032	0.762646	0.870552	0.695105	0.315477	0.501064	1.45107e-12
SNX29	6.4361e-09	6.19802e-11	0.0481417	0.0328725	0.0534814	0.329021	0.145523	0.944732	0.687152	0.46441	0.610009	0.458061	0.686237	0.249982	0.639869	1.54051e-12
CSF1	1.55101e-05	5.14292e-10	0.0064507	0.00253114	0.0196695	0.618582	0.775875	0.244275	0.784794	0.224392	0.15072	0.603711	0.885992	0.0063509	0.559258	1.55604e-12
IGF2	0.000760351	5.66795e-10	0.000183695	0.00656372	0.0128005	0.245997	0.422444	0.777909	0.674309	0.0746497	0.143426	0.834989	0.338827	0.0617178	0.223499	1.55646e-12
PDE3A	2.11713e-05	1.25859e-11	0.00371037	0.0495234	0.0884642	0.0312034	0.0808833	0.937303	0.59569	0.328464	0.084512	0.901903	0.638261	0.230758	0.681899	1.57206e-12
TFRC	1.74693e-06	2.86336e-11	0.264428	0.00308498	0.0688329	0.323139	0.08734	0.134764	0.683589	0.266042	0.4791	0.675554	0.980066	0.0744739	0.340493	1.59409e-12
TXNRD1	1.22166e-08	1.08482e-10	0.101461	0.0187124	0.0593504	0.285317	0.240952	0.525186	0.319066	0.277705	0.541869	0.583399	0.959794	0.20023	0.541112	1.60022e-12
ATXN1	1.42119e-05	4.02715e-13	0.00539401	0.0196559	0.0778545	0.147946	0.323671	0.86771	0.709175	0.34698	0.274874	0.867876	0.861295	0.240612	0.668864	1.62112e-12
ZNF468	0.000194919	2.12889e-11	0.0122873	0.00666451	0.0117266	0.567043	0.296474	0.196682	0.775611	0.191636	0.215784	0.495984	0.880662	0.015491	0.569872	1.64621e-12
ZBED4	3.5571e-06	1.2517e-11	0.0629425	0.00858447	0.20079	0.574233	0.0448086	0.100063	0.554721	0.305318	0.266859	0.992901	0.605461	0.0764858	0.645172	1.67571e-12
ANTXR1	0.280773	6.29127e-08	5.06354e-07	0.091948	0.00118498	0.273651	0.832782	0.761389	0.376349	0.0022246	0.229295	0.978631	0.0363547	0.347518	0.0416386	1.67853e-12
NR6A1	0.0561991	5.53764e-15	0.032611	0.00890309	0.233594	0.822974	0.0144451	0.159614	0.60202	0.343581	0.127041	0.751187	0.428543	0.0973101	0.510085	1.68657e-12
TGFB1I1	0.000237656	1.44578e-10	0.00747026	0.00152748	0.0263462	0.195518	0.135606	0.436924	0.575541	0.179971	0.143058	0.953017	0.803388	0.0408806	0.306806	1.70285e-12
MYB	1.89946e-08	1.11398e-10	0.174507	0.00287121	0.0422763	0.813586	0.137238	0.12566	0.750819	0.441863	0.908567	0.903327	0.706196	0.284158	0.509107	1.73858e-12
CERS2	0.000716752	1.11267e-13	0.0174489	0.157594	0.425888	0.00597944	0.0924638	0.760379	0.322181	0.356054	0.0246913	0.702138	0.918487	0.360447	0.705064	1.79439e-12
NFE2L3	2.26362e-07	2.83601e-13	0.527865	0.00291204	0.386626	0.530233	0.0326285	0.333331	0.721275	0.933755	0.727947	0.942944	0.817923	0.256785	0.899632	1.86894e-12
ZNF695	7.12578e-05	6.54605e-15	0.100023	0.00600992	0.258258	0.980173	0.289908	0.0956625	0.758443	0.818437	0.305295	0.993822	0.902474	0.0649202	0.886901	1.87237e-12
ILK	0.0914853	3.92579e-12	0.000877778	0.00343265	0.0167767	0.564391	0.0906046	0.295603	0.870169	0.0515863	0.196491	0.899538	0.498807	0.0264686	0.680932	1.89551e-12
HOXA4	1.82186e-05	3.85458e-10	0.0108783	0.0093054	0.0332103	0.0533235	0.0483991	0.536671	0.634732	0.207882	0.108229	0.886276	0.908213	0.114075	0.457677	1.89913e-12
TRIM55	8.27848e-08	2.00251e-11	0.0677868	0.0294921	0.437158	0.11736	0.160871	0.467271	0.316169	0.588516	0.234519	0.942464	0.832306	0.18471	0.252227	1.95531e-12
PDGFC	0.0175594	4.91447e-10	8.76513e-05	0.0125406	0.00518883	0.267571	0.444902	0.137059	0.260135	0.046575	0.247324	0.788163	0.350971	0.239311	0.130099	1.98045e-12
E2F8	5.10003e-06	7.81257e-11	0.0258598	0.00485469	0.157443	0.207417	0.0895545	0.111094	0.836596	0.394108	0.173767	0.67443	0.44869	0.0930192	0.817354	2.03147e-12
IQGAP3	7.26953e-05	9.25114e-14	0.166564	0.00347651	0.42798	0.471257	0.0252916	0.163237	0.60569	0.689987	0.352475	0.863754	0.696415	0.0930319	0.819982	2.06753e-12
POU3F3	6.39396e-06	1.21668e-08	0.00145488	0.0141461	0.00421974	0.629007	0.0968868	0.610137	0.172507	0.0591642	0.192897	0.962035	0.939443	0.153049	0.326512	2.09777e-12
INSIG1	1.19623e-05	9.27049e-12	0.0649237	0.011521	0.110477	0.270405	0.115134	0.236001	0.723661	0.33981	0.127033	0.454016	0.770575	0.139084	0.221326	2.12042e-12
TBX1	2.36466e-06	1.01118e-08	0.00731041	0.0339625	0.00402703	0.467276	0.118008	0.272952	0.584583	0.0695256	0.384302	0.321653	0.322031	0.100648	0.398517	2.17047e-12
PKD2	2.55137e-05	1.55141e-11	0.00201166	0.0498409	0.0932163	0.0598234	0.110807	0.770036	0.568195	0.275644	0.0958297	0.944262	0.591328	0.22586	0.654108	2.17257e-12
DCX	6.20408e-06	5.59895e-12	0.0715987	0.00383681	0.172741	0.0554648	0.0913131	0.552721	0.624941	0.542004	0.100086	0.964187	0.662203	0.323955	0.732235	2.19487e-12
NKX6-3	2.1923e-12	1.17926e-06	0.0118213	0.135193	0.0839577	0.371276	0.141108	0.22319	0.87873	0.143086	0.640091	0.793899	0.411673	0.614657	0.369509	2.23309e-12
HNF4A	0.00145512	3.01865e-14	0.109544	0.0396183	0.0566827	0.118829	0.00525149	0.550511	0.793271	0.560137	0.312367	0.462332	0.374844	0.292261	0.92912	2.23414e-12
LHCGR	0.000164627	5.18436e-13	0.0260963	0.0330281	0.582333	0.0127422	0.0146041	0.643447	0.634419	0.868151	0.0780784	0.343701	0.574023	0.65873	0.874542	2.29218e-12
DLG4	1.88791e-07	1.65686e-09	0.0148425	0.00638321	0.00613705	0.461868	0.458649	0.3038	0.979134	0.312639	0.186256	0.869234	0.454039	0.104796	0.919694	2.31421e-12
NCOA6	0.00608982	6.31619e-13	0.44805	0.00173957	0.481686	0.378737	0.00738558	0.160418	0.479688	0.309929	0.110892	0.679065	0.0915772	0.214083	0.18524	2.38113e-12
TOP1	0.000320069	1.01372e-13	0.0444314	0.00643811	0.117837	0.321432	0.0461675	0.413192	0.661258	0.67432	0.160652	0.862822	0.643002	0.115947	0.85798	2.39274e-12
LDB2	8.73965e-07	3.24846e-12	0.0288508	0.0118835	0.240155	0.592639	0.202248	0.694875	0.625615	0.457734	0.355704	0.772735	0.362072	0.0878122	0.545914	2.39866e-12
L3MBTL3	8.10687e-07	5.4853e-10	0.000891922	0.126903	0.073214	0.0838709	0.154835	0.693645	0.92213	0.0905454	0.222138	0.91333	0.34035	0.388791	0.359519	2.40919e-12
TBX18	0.0631197	9.76346e-10	4.26705e-05	0.0721519	0.00717437	0.140237	0.22515	0.576332	0.520776	0.0135348	0.211242	0.935524	0.0160898	0.333718	0.146642	2.43799e-12
POU2F2	1.7119e-06	1.37088e-10	0.0137108	0.073809	0.387533	0.495828	0.111665	0.126326	0.911036	0.107682	0.337275	0.475529	0.853717	0.0841629	0.0381485	2.47878e-12
FZD8	3.04557e-05	8.58267e-08	0.00063227	0.00817162	0.00778387	0.395588	0.801438	0.221832	0.827035	0.00808683	0.297469	0.56088	0.985655	0.146076	0.023948	2.52546e-12
RGS5	5.17626e-12	2.29224e-08	0.0282014	0.0651659	0.391462	0.828919	0.130785	0.470001	0.637278	0.251836	0.700134	0.697025	0.815087	0.322774	0.317431	2.52562e-12
TNFSF4	0.0796702	9.25708e-06	3.54059e-08	0.590739	0.00157666	0.849833	0.383292	0.937965	0.561893	3.76735e-05	0.21694	0.655594	0.0620591	0.265257	0.0772696	2.52615e-12
ZNF843	9.77305e-07	1.65093e-10	0.00490467	0.00332803	0.0108331	0.619137	0.667001	0.546905	0.738789	0.180589	0.444547	0.700965	0.943659	0.339109	0.344457	2.59888e-12
MAPK15	0.000283762	6.96008e-14	0.0792739	0.00553759	0.31257	0.365454	0.188321	0.382822	0.584731	0.40178	0.112066	0.502183	0.9718	0.0831356	0.410572	2.71846e-12
MRGPRX2	0.000175351	4.30324e-13	0.677137	0.013409	0.271266	0.00954983	0.0491319	0.410381	0.167374	0.936255	0.0471095	0.784471	0.681612	0.330189	0.675973	2.73284e-12
DTNA	2.28049e-05	2.14604e-10	0.0125793	0.0446478	0.112509	0.0288318	0.0451083	0.722098	0.357509	0.359153	0.0357543	0.842367	0.913098	0.0757091	0.407882	2.74207e-12
SPOCK1	0.259925	2.41389e-07	4.71139e-07	0.139546	0.0013297	0.0840441	0.471984	0.869787	0.820156	0.00244077	0.0751797	0.97005	0.101193	0.175241	0.065589	2.77294e-12
CCL24	0.00510237	0.00334624	0.00187532	0.0904768	0.437184	4.55934e-05	0.0267931	0.49612	0.505789	0.0269608	0.000383359	0.469316	0.0611584	0.119582	0.00233462	2.77421e-12
ADRB3	5.26041e-07	6.25599e-10	0.0299033	0.00873146	0.0824773	0.245329	0.14059	0.468469	0.267871	0.194468	0.219795	0.962238	0.723722	0.131488	0.270442	2.79495e-12
ZNF34	5.29107e-06	1.42225e-09	0.0880098	0.0247109	0.0212064	0.0708584	0.267604	0.864825	0.0951026	0.308572	0.0862633	0.620882	0.28608	0.0588219	0.221078	2.84837e-12
EGR3	4.86526e-07	2.16954e-11	0.0305515	0.00660514	0.092991	0.521396	0.0529098	0.51162	0.97406	0.537173	0.497016	0.696639	0.365793	0.289216	0.660996	2.98757e-12
LZTS1	0.00300583	1.11676e-08	6.58932e-06	0.0491351	0.000693544	0.272423	0.765013	0.84115	0.972824	0.0188263	0.23826	0.702036	0.293727	0.148804	0.206075	3.05469e-12
TNFRSF10B	7.86644e-11	7.37376e-07	0.00748517	0.06272	0.051595	0.555351	0.23865	0.543954	0.487543	0.093673	0.595249	0.672618	0.969443	0.0530196	0.385573	3.07047e-12
CAV1	0.0155683	1.46949e-11	0.00122491	0.0502096	0.186023	0.026746	0.0624113	0.516199	0.938133	0.185531	0.013059	0.951829	0.371348	0.0312808	0.656971	3.10438e-12
GNG8	1.69354e-06	1.92787e-09	0.0325922	0.0145865	0.246516	0.22698	0.0401465	0.204676	0.562886	0.0892997	0.266954	0.755497	0.951226	0.0829023	0.0665156	3.14982e-12
ZSCAN18	3.49694e-08	2.56797e-09	0.0983637	0.00700994	0.0277931	0.35333	0.168338	0.821522	0.355733	0.458661	0.323453	0.636445	0.599189	0.0598467	0.378066	3.1716e-12
TCEAL1	9.18334e-08	1.23274e-10	0.10133	0.0149392	0.0777426	0.177596	0.06286	0.448045	0.304458	0.602095	0.332738	0.953771	0.680823	0.197712	0.737153	3.18272e-12
VENTX	7.97762e-05	9.9953e-12	0.010605	0.0192565	0.0326248	0.227345	0.433831	0.64707	0.518929	0.239341	0.152553	0.596957	0.30237	0.0490393	0.68326	3.20711e-12
MYOCD	9.65501e-06	1.00177e-10	0.0260729	0.0311235	0.106691	0.0461385	0.0873115	0.80901	0.305962	0.398145	0.049882	0.947132	0.66037	0.0845503	0.446873	3.22832e-12
TACR1	4.76419e-05	2.69598e-12	0.0657491	0.0280899	0.286994	0.0312103	0.0727914	0.46392	0.74613	0.589539	0.0583402	0.841223	0.675196	0.0715692	0.538196	3.29726e-12
ZNF57	9.21401e-07	4.5982e-08	0.0124178	0.00520745	0.00101783	0.863952	0.421487	0.319663	0.454097	0.0926002	0.393542	0.56746	0.794781	0.0508741	0.329032	3.31399e-12
DLX1	1.52606e-05	1.97792e-11	0.0255707	0.0245192	0.010293	0.256951	0.113116	0.678966	0.276505	0.337251	0.234753	0.823572	0.392917	0.171195	0.875319	3.32985e-12
ADGRA2	3.43666e-05	2.25304e-10	0.0016863	0.00206958	0.015867	0.659719	0.725713	0.582696	0.910631	0.0961219	0.404824	0.765304	0.514548	0.161861	0.152625	3.35648e-12
ZDHHC11	0.419173	5.52005e-08	0.00019354	0.00774099	0.00383023	0.762524	0.0844076	0.193127	0.321845	0.00700218	0.0689514	0.468413	0.100706	0.0511762	0.0699609	3.4855e-12
KLHL12	0.000126181	2.87183e-11	0.0173449	0.00601273	0.150361	0.753998	0.0944616	0.0485821	0.89697	0.191463	0.186064	0.832577	0.579599	0.0720063	0.19997	3.5065e-12
OTX1	1.1038e-05	1.03665e-13	0.432551	0.0198392	0.38172	0.157035	0.0341588	0.723511	0.228409	0.873388	0.137051	0.960204	0.755848	0.156009	0.977836	3.52971e-12
NTRK2	3.19499e-08	2.24432e-07	0.00246268	0.0249328	0.0037744	0.396597	0.138801	0.556189	0.40794	0.16811	0.690303	0.620857	0.211571	0.240897	0.590813	3.59064e-12
ZNF467	2.45133e-06	1.16183e-09	0.0235929	0.00365106	0.0371825	0.507279	0.191476	0.370299	0.890893	0.195748	0.340885	0.615084	0.447487	0.0357002	0.235076	3.59201e-12
PRDM7	0.0143868	7.70233e-15	0.0582963	0.00295762	0.131411	0.805513	0.414921	0.289556	0.83077	0.203869	0.264316	0.479315	0.790787	0.0603975	0.181785	3.60509e-12
IL1RAPL1	0.00190979	2.66082e-09	0.0107793	0.0146616	0.0990633	0.00485406	0.00363316	0.9655	0.223162	0.204245	0.00745395	0.968652	0.681915	0.299485	0.503895	3.64222e-12
ACVRL1	2.69555e-06	4.50472e-08	0.00067772	0.00653166	0.0257159	0.336959	0.866391	0.599416	0.603367	0.0938446	0.0865298	0.504328	0.40603	0.0962399	0.199717	3.68877e-12
ZBED9	7.20523e-10	3.95609e-08	0.034508	0.0419868	0.0697428	0.840794	0.043258	0.158099	0.80184	0.171458	0.682974	0.583761	0.570323	0.46903	0.19387	3.71515e-12
CALY	7.1782e-07	4.45745e-11	0.0328473	0.0103648	0.0672182	0.631708	0.0754781	0.344473	0.7233	0.279121	0.26043	0.829783	0.795176	0.217471	0.531195	3.78236e-12
CDKN2AIP	2.90699e-12	0.000106354	0.0073776	0.191266	0.00325939	0.61731	0.757795	0.863519	0.137962	0.0646341	0.442772	0.86863	0.332996	0.102321	0.718312	3.78326e-12
ZBTB4	8.92069e-06	2.97535e-12	0.0751011	0.00472316	0.0745564	0.232288	0.195085	0.441472	0.552009	0.60768	0.21287	0.867059	0.875873	0.103684	0.615159	3.80473e-12
RHPN2	2.49873e-07	4.41788e-11	0.236362	0.0293858	0.0574963	0.336529	0.0215375	0.626574	0.263367	0.480082	0.586302	0.63057	0.619356	0.123768	0.677795	3.80793e-12
GREM2	6.47403e-08	1.55382e-09	0.0095544	0.0138284	0.394767	0.346898	0.199131	0.261856	0.825603	0.102155	0.728286	0.479919	0.73748	0.221184	0.107854	3.84352e-12
ZNF157	4.21072e-09	1.71223e-09	0.12372	0.159514	0.0896036	0.127252	0.0119677	0.842099	0.745293	0.317959	0.397032	0.545064	0.560241	0.39013	0.288113	4.05558e-12
GLIS3	2.68587e-05	1.17468e-10	0.00116063	0.00960209	0.0554495	0.466917	0.415702	0.340657	0.45526	0.100355	0.424416	0.780337	0.311124	0.322463	0.270389	4.06229e-12
FZD1	0.00610861	2.22835e-09	4.7652e-05	0.014049	0.00505099	0.284787	0.92823	0.670321	0.927493	0.0146738	0.22276	0.815334	0.258371	0.103355	0.100968	4.14678e-12
IQSEC3	1.18165e-05	5.47554e-09	0.00589508	0.00460578	0.00827062	0.967514	0.361923	0.50727	0.702849	0.080108	0.11114	0.486727	0.342945	0.0462848	0.435906	4.14851e-12
TFB2M	1.87963e-06	4.58376e-11	0.0459378	0.00994472	0.0407193	0.747554	0.897318	0.0878469	0.816661	0.124939	0.716565	0.591657	0.411263	0.326648	0.104668	4.32554e-12
ARHGEF6	0.00017364	4.68982e-14	0.0225266	0.0614685	0.298024	0.653995	0.100726	0.857964	0.287449	0.256008	0.196187	0.365169	0.867576	0.141595	0.472559	4.36478e-12
MPP7	0.000429817	8.19612e-10	0.0785981	0.0748119	0.214082	0.0056978	0.0148405	0.925271	0.0683349	0.281337	0.0118307	0.877115	0.445985	0.0959623	0.199518	4.42072e-12
CD79B	6.52035e-06	1.27696e-11	0.0433759	0.0415922	0.444866	0.766844	0.0830499	0.131381	0.978905	0.216668	0.34603	0.430401	0.964092	0.0460206	0.0762232	4.45647e-12
FZD5	6.88583e-05	1.79787e-09	0.00831364	0.0523012	0.0454775	0.292555	0.0257936	0.158608	0.77227	0.0195827	0.683287	0.721953	0.0408521	0.146909	0.463144	4.51484e-12
THY1	0.0356206	6.35581e-08	1.57337e-05	0.0114343	0.00659869	0.959489	0.77202	0.370345	0.865368	0.0045885	0.147606	0.947351	0.0590848	0.0475124	0.0533697	4.54766e-12
FLI1	5.59351e-05	1.16157e-13	0.0387059	0.0279042	0.354422	0.82088	0.199693	0.565562	0.475016	0.243788	0.199956	0.483903	0.642376	0.0761192	0.494752	4.6137e-12
RUVBL1	3.22735e-07	2.48212e-10	0.0556778	0.0811155	0.340254	0.0116906	0.0859276	0.56515	0.213689	0.575714	0.0640628	0.743983	0.904373	0.356361	0.478915	4.65562e-12
TONSL	7.53279e-06	8.63457e-14	0.0917204	0.0586509	0.429409	0.286155	0.0476259	0.206474	0.735213	0.544845	0.463711	0.983945	0.368517	0.267822	0.838643	4.69555e-12
MAMSTR	2.01123e-13	7.09462e-06	0.127468	0.0163004	0.0349986	0.925015	0.367112	0.357127	0.813618	0.195267	0.846998	0.608387	0.941234	0.174576	0.379339	4.70986e-12
POU3F1	6.36581e-07	8.38493e-10	0.0121468	0.0698187	0.0213837	0.675002	0.149354	0.564695	0.3168	0.0990701	0.34546	0.509533	0.989034	0.13951	0.155379	4.76888e-12
ARHGAP24	6.12415e-07	4.61092e-13	0.108349	0.0198346	0.500414	0.564372	0.0729043	0.464286	0.674562	0.682954	0.393411	0.917533	0.503183	0.182479	0.740239	4.78563e-12
TBX20	4.98269e-05	9.58362e-09	0.000152798	0.0185379	0.0289423	0.456824	0.160075	0.763476	0.354978	0.00429418	0.463616	0.688416	0.869116	0.42252	0.170645	4.84471e-12
HNF4G	1.22175e-07	1.00813e-09	0.105926	0.0054346	0.00292352	0.910346	0.128625	0.396722	0.947216	0.255172	0.864226	0.598972	0.494621	0.156559	0.728317	4.91764e-12
GPRC5D	0.236747	1.39674e-11	0.00284109	0.211519	0.0160116	0.0228398	0.253138	0.50344	0.122809	0.18788	0.00299406	0.335717	0.582031	0.0623525	0.886523	4.98133e-12
CAP2	0.000291443	9.7042e-11	0.0131608	0.0441486	0.0334502	0.0244837	0.0343413	0.955444	0.26299	0.335812	0.0358424	0.773648	0.788004	0.119078	0.70232	5.0999e-12
NTRK1	5.87897e-05	5.24056e-11	0.00199459	0.041803	0.178153	0.439922	0.275938	0.528552	0.836921	0.0181068	0.384139	0.430643	0.890466	0.295828	0.0369843	5.12443e-12
GRIK3	1.19677e-05	1.79917e-11	0.066188	0.0336021	0.0465705	0.405659	0.22788	0.801315	0.19752	0.293537	0.0860716	0.861211	0.45853	0.0511765	0.432036	5.13885e-12
TWIST1	0.0379054	1.76247e-09	2.9682e-05	0.0116434	0.00498762	0.528015	0.411926	0.635905	0.99436	0.0229104	0.223802	0.951263	0.0966841	0.0707499	0.136583	5.14931e-12
TADA1	3.19714e-05	1.2522e-11	0.028832	0.00324875	0.125547	0.919264	0.626966	0.193501	0.86152	0.123107	0.431591	0.548688	0.964995	0.0684915	0.0873129	5.3619e-12
PTPRM	4.28033e-07	2.66149e-11	0.0109173	0.0289946	0.0983376	0.316733	0.377874	0.85296	0.821099	0.360622	0.431301	0.732885	0.431828	0.115445	0.454143	5.39478e-12
SOX3	1.33719e-06	2.38209e-12	0.151236	0.0374524	0.169429	0.201587	0.0326252	0.490207	0.674704	0.729392	0.0852889	0.838148	0.629446	0.48264	0.728777	5.39736e-12
RPL7L1	6.80049e-07	6.56626e-13	0.0598451	0.0484014	0.551576	0.761814	0.1307	0.0896828	0.992208	0.544421	0.390616	0.859215	0.511789	0.161363	0.812137	5.43505e-12
TOP2A	6.47236e-05	2.64174e-13	0.124443	0.00232756	0.277303	0.428023	0.17586	0.136707	0.60473	0.752834	0.36515	0.909838	0.79348	0.0530242	0.871484	5.48369e-12
ZNF384	4.66928e-06	2.28261e-11	0.0243529	0.00262665	0.202211	0.284583	0.136176	0.17655	0.817736	0.574949	0.407881	0.938352	0.630451	0.127855	0.580715	5.54105e-12
RAMP2	2.68516e-07	8.63978e-09	0.0309273	0.00460305	0.113949	0.682958	0.314657	0.0974771	0.797207	0.105195	0.325423	0.818952	0.601484	0.0258375	0.290366	5.54406e-12
HPGDS	6.30484e-07	5.0253e-13	0.14345	0.0304641	0.474258	0.345472	0.150325	0.242892	0.389555	0.562505	0.318822	0.928091	0.853267	0.35847	0.487075	5.57104e-12
NFATC1	2.96979e-05	1.58835e-12	0.0222308	0.0541888	0.0844128	0.353423	0.136704	0.492376	0.761523	0.234734	0.249123	0.315828	0.601957	0.274811	0.302738	5.59012e-12
TOX2	4.7838e-07	1.30616e-10	0.0628857	0.0193291	0.137021	0.61428	0.301	0.448012	0.762165	0.198035	0.339038	0.431303	0.889016	0.0622289	0.080686	5.83035e-12
KAT2B	4.34049e-05	5.80703e-15	0.177694	0.0739221	0.836501	0.196659	0.0297426	0.471487	0.578379	0.462013	0.272639	0.70649	0.91788	0.374606	0.636165	5.88587e-12
PATJ	0.000379542	8.22427e-07	0.000408859	0.0234641	0.00565461	0.349321	0.0970449	0.142118	0.50003	0.0144838	0.203933	0.951079	0.0834107	0.0248249	0.363684	5.90184e-12
ZNF365	0.00234775	2.58349e-05	1.63511e-05	0.181205	0.000303577	0.208692	0.247902	0.260784	0.0909889	0.00542188	0.23727	0.867716	0.0251454	0.594162	0.0785069	5.97417e-12
TCEAL6	6.3302e-05	3.98095e-11	0.0225262	0.00816888	0.0416039	0.207678	0.0805741	0.491127	0.467833	0.309389	0.136061	0.939063	0.701346	0.100256	0.425727	5.97861e-12
HAND2	0.00177255	1.92032e-09	0.0185423	0.0277558	0.0384163	0.00836413	0.0547293	0.795681	0.17039	0.264964	0.00339496	0.940161	0.636163	0.083079	0.472863	6.00476e-12
ZDHHC2	7.11816e-10	5.88805e-09	0.0119388	0.0839485	0.236675	0.512447	0.0883772	0.282923	0.908611	0.119822	0.710553	0.735031	0.459898	0.734521	0.361137	6.00926e-12
FOXD4	7.04169e-14	0.00731069	0.01769	0.323125	0.00631326	0.205755	0.153914	0.396122	0.621271	0.136711	0.437197	0.427642	0.523514	0.205764	0.22221	6.0206e-12
PTH1R	1.60487e-05	4.11331e-10	0.0292666	0.00231555	0.0253767	0.54856	0.0759844	0.240448	0.846267	0.185182	0.179638	0.900689	0.28412	0.120343	0.906922	6.06608e-12
ZDHHC5	1.4299e-05	1.28923e-10	0.158855	0.107843	0.322907	0.0223075	0.00254779	0.548641	0.236289	0.72889	0.045913	0.736037	0.558644	0.107756	0.806093	6.08397e-12
FOXC2	8.44074e-05	1.83971e-08	0.000193158	0.0102409	0.00183761	0.666807	0.659747	0.435368	0.644124	0.0431628	0.513376	0.794816	0.158528	0.186253	0.252323	6.16464e-12
LSP1	0.00010187	4.16112e-11	0.0239922	0.0097878	0.114581	0.811267	0.249736	0.144963	0.846633	0.258708	0.144169	0.760712	0.578588	0.00620634	0.318401	6.19707e-12
RAB29	1.50217e-12	3.7678e-05	0.0148717	0.214214	0.0170669	0.480516	0.537904	0.838219	0.518116	0.0374674	0.835267	0.385282	0.70898	0.598173	0.0524134	6.22676e-12
ZDHHC9	0.000106763	1.70196e-12	0.0857156	0.0563075	0.203775	0.0870776	0.0197917	0.582285	0.534571	0.361298	0.0403921	0.948575	0.736653	0.254103	0.382652	6.35331e-12
GPR35	3.54273e-06	1.23561e-11	0.0599604	0.09615	0.0417737	0.16002	0.0230872	0.809928	0.48715	0.31849	0.527805	0.570839	0.547042	0.245458	0.482144	6.37407e-12
ZNF124	0.0443562	4.13253e-13	0.0397013	0.00429122	0.0571157	0.417171	0.0141875	0.169786	0.624178	0.357034	0.270429	0.627768	0.499921	0.0521046	0.547081	6.43346e-12
RTF1	0.0152367	0.283725	0.000186399	0.464691	0.193009	8.44875e-06	0.109083	0.508662	0.205099	0.0179137	0.000110124	0.0829347	0.0540179	0.81298	0.00196558	6.50948e-12
ADCY5	7.29939e-07	1.83243e-10	0.0429864	0.0210069	0.14992	0.106394	0.194526	0.744889	0.263656	0.369517	0.216496	0.926066	0.579287	0.105496	0.297938	6.56737e-12
CHST11	0.00420784	9.17679e-13	0.0024603	0.0347719	0.0317946	0.66717	0.311023	0.840915	0.566729	0.0955475	0.107049	0.523277	0.796639	0.0686954	0.327749	6.58898e-12
CAMK2A	3.07891e-05	6.20901e-11	0.0255111	0.0260169	0.079536	0.0211604	0.0919972	0.757907	0.339938	0.400629	0.0515668	0.875773	0.954973	0.16063	0.710965	6.59719e-12
CNR1	2.03396e-07	3.13879e-10	0.0108213	0.161559	0.228413	0.101627	0.0273234	0.656161	0.539165	0.333648	0.147392	0.864666	0.641295	0.476721	0.312752	6.69504e-12
KHDRBS2	2.54431e-06	2.48907e-11	0.0320482	0.0807892	0.203076	0.0734174	0.044871	0.554433	0.397299	0.299008	0.0904991	0.936151	0.582236	0.323852	0.887572	6.72605e-12
GNAL	4.03354e-05	7.99817e-10	0.00940195	0.0134321	0.0287795	0.0494773	0.0298342	0.851119	0.797252	0.246141	0.0478317	0.803235	0.89266	0.184176	0.567239	6.78267e-12
PEG3	7.8441e-05	3.34647e-11	0.00934365	0.0220976	0.063757	0.0598599	0.10047	0.769276	0.409648	0.339654	0.0752194	0.988025	0.756368	0.13533	0.636513	6.98798e-12
FOXP4	0.00100738	5.41973e-12	0.00651944	0.622618	0.983665	0.00336664	0.00724786	0.939724	0.917447	0.275498	0.00750965	0.396616	0.367744	0.867184	0.919986	7.12074e-12
CX3CL1	1.52458e-11	5.71453e-05	0.0830591	0.0044721	0.02245	0.300808	0.355566	0.231118	0.993882	0.0975473	0.485999	0.701855	0.564071	0.60722	0.0554214	7.23522e-12
FANCD2	0.000146959	3.40522e-11	0.00317526	0.00118226	0.126289	0.989686	0.195465	0.0980263	0.856527	0.356958	0.472943	0.836877	0.607564	0.0410725	0.859545	7.43154e-12
ZNF774	0.109647	1.37286e-13	0.00754062	0.0589018	0.155899	0.691043	0.00946607	0.395666	0.815537	0.102994	0.195689	0.702388	0.14239	0.051011	0.52034	7.47719e-12
RERG	2.48662e-06	6.67664e-10	0.0062828	0.0209056	0.0631389	0.0914743	0.0395029	0.573287	0.712832	0.320031	0.178056	0.968699	0.615635	0.399251	0.434937	7.58627e-12
NRXN1	5.21667e-05	5.58804e-11	0.0610279	0.0102602	0.152564	0.0412544	0.056379	0.54617	0.461328	0.558001	0.0460735	0.936803	0.881557	0.0616216	0.566431	7.63267e-12
TAF4B	2.07e-10	4.56959e-05	0.00280983	0.00102245	0.139069	0.155033	0.995895	0.0344187	0.90159	0.258319	0.358739	0.918736	0.638146	0.135878	0.925062	7.76258e-12
ZNF518B	3.53666e-09	3.58513e-09	0.145403	0.0593159	0.0914366	0.740085	0.0259334	0.874387	0.350444	0.291191	0.567259	0.803583	0.474763	0.0657667	0.509573	7.78843e-12
IL16	3.19787e-05	1.0845e-12	0.0217369	0.0430618	0.347974	0.768397	0.142435	0.484974	0.704047	0.152863	0.208133	0.383827	0.851091	0.097672	0.292791	7.84907e-12
MLX	1.41096e-09	2.00044e-07	0.00734392	0.205087	0.0481312	0.0389543	0.177598	0.900732	0.249551	0.205358	0.216992	0.523179	0.947698	0.546912	0.326379	7.84998e-12
ADORA3	0.105077	5.5889e-09	6.18531e-06	0.137665	0.0374025	0.17061	0.666528	0.560519	0.748182	0.0115976	0.0144925	0.377206	0.0731553	0.064903	0.477508	7.97932e-12
PGR	1.06593e-06	1.05014e-10	0.00956043	0.0296779	0.137305	0.114667	0.124431	0.569312	0.539651	0.288413	0.17655	0.956	0.995617	0.289396	0.47991	8.00125e-12
FZD10	1.89512e-14	1.43079e-05	0.122834	0.0229534	0.403945	0.313468	0.716377	0.282335	0.660994	0.513716	0.460602	0.551275	0.435913	0.461047	0.379764	8.00947e-12
SUDS3	2.01044e-07	1.09703e-08	0.00334924	0.00898482	0.0905833	0.499699	0.653184	0.17582	0.881178	0.205737	0.560555	0.884702	0.377893	0.0127982	0.863375	8.04126e-12
FST	8.92899e-06	2.59483e-10	0.00458654	0.00516545	0.0442113	0.876242	0.0990631	0.529408	0.967672	0.207877	0.537306	0.97666	0.186749	0.113731	0.523383	8.10472e-12
CX3CR1	6.78112e-10	3.77128e-10	0.168021	0.0401118	0.387067	0.765125	0.161336	0.227506	0.703416	0.551085	0.511641	0.638201	0.979149	0.0915136	0.63983	8.34394e-12
CD72	8.10138e-05	7.37359e-12	0.00353338	0.114332	0.0855344	0.863704	0.251241	0.496961	0.917398	0.0798465	0.14465	0.215508	0.746512	0.130281	0.288851	8.66075e-12
VIP	0.00873783	1.14127e-08	0.102447	0.00515447	0.0320879	0.0160563	0.015856	0.748107	0.131422	0.407226	0.000778147	0.427044	0.824034	0.0443785	0.70202	8.85129e-12
TRIB1	1.99835e-05	8.6644e-13	0.147787	0.0734845	0.245521	0.0826508	0.0364635	0.703512	0.428524	0.45406	0.0421431	0.8471	0.830706	0.732824	0.357222	8.89353e-12
SPSB4	0.0129469	9.08795e-12	0.0210898	0.00723296	0.00784994	0.273648	0.00893323	0.738102	0.939828	0.17267	0.173169	0.860093	0.131433	0.209906	0.874358	8.91007e-12
PAWR	1.28798e-09	3.15628e-09	0.058199	0.012516	0.119298	0.902793	0.344041	0.0889206	0.824934	0.452822	0.715547	0.971995	0.823093	0.109608	0.666549	9.10193e-12
NCAM1	2.17334e-06	8.13912e-11	0.134123	0.0430871	0.262624	0.0485269	0.0358684	0.648985	0.294561	0.703865	0.0584899	0.818734	0.674136	0.141587	0.548255	9.33414e-12
ARL4C	0.593915	2.1368e-07	1.10282e-06	0.0418289	0.00128958	0.679411	0.749845	0.520468	0.659274	0.00160436	0.107138	0.948312	0.0948635	0.104049	0.075523	9.45964e-12
TNFSF18	0.000242036	1.45895e-05	0.000105721	0.167613	0.00915909	0.132888	0.653371	0.79322	0.833277	0.00119021	0.0649136	0.0686177	0.514296	0.0959573	0.0191505	9.65775e-12
FGA	1.33119e-09	0.000288498	0.0292811	0.653597	0.711326	6.48923e-05	0.307285	0.803433	0.834551	0.573955	0.000644622	0.0761393	0.688488	0.627729	0.198253	9.83227e-12
ZNF580	0.014276	5.07268e-11	0.194657	0.000916173	0.0467027	0.123006	0.0196051	0.303878	0.529355	0.262234	0.0565853	0.623825	0.476212	0.0233079	0.702139	9.83557e-12
TCEAL8	3.39892e-08	3.74603e-09	0.0204959	0.0603793	0.172229	0.81098	0.0551858	0.0521315	0.615422	0.224545	0.640774	0.628483	0.405931	0.494288	0.246903	1.00898e-11
HIC1	6.72413e-07	4.10431e-08	0.022143	0.00109143	0.0124895	0.780874	0.872178	0.137098	0.976268	0.0708446	0.528452	0.749548	0.977481	0.122855	0.0682708	1.00958e-11
NAT14	2.00398e-09	0.000302116	0.02258	0.00899656	0.00374917	0.432961	0.325797	0.303625	0.845004	0.028612	0.372764	0.449846	0.28121	0.0352852	0.220564	1.0119e-11
CAMTA2	0.0218148	8.64723e-14	0.0814501	0.00220635	0.111726	0.436508	0.132218	0.393706	0.374235	0.780906	0.0761069	0.677004	0.847863	0.0219758	0.747032	1.0344e-11
ARHGEF38	9.63488e-05	2.83229e-09	0.005175	0.0223252	0.0100508	0.709423	0.0298092	0.424244	0.591375	0.050492	0.407128	0.866975	0.109281	0.0763401	0.733735	1.0476e-11
ZBTB10	2.62109e-10	1.75243e-05	0.00190574	0.110286	0.00683646	0.647158	0.1908	0.695573	0.784169	0.073853	0.586243	0.688214	0.472789	0.203503	0.144921	1.05311e-11
HOXB4	1.31462e-06	2.00787e-09	0.0198922	0.00478766	0.0276073	0.139605	0.620082	0.206299	0.827917	0.0859138	0.300935	0.888022	0.687806	0.611922	0.190863	1.07286e-11
KLF8	7.73104e-08	4.75596e-11	0.0402431	0.116221	0.175048	0.0709634	0.0984025	0.672151	0.96295	0.41896	0.289029	0.681833	0.687939	0.365671	0.702349	1.11234e-11
PDE2A	8.52053e-07	3.03626e-11	0.0821432	0.0096579	0.223927	0.365749	0.152513	0.756921	0.369795	0.765999	0.211152	0.876004	0.602861	0.0494755	0.65607	1.11437e-11
PKN3	1.64842e-09	1.51036e-07	0.00565738	0.228058	0.245234	0.264689	0.125869	0.339405	0.425574	0.0342591	0.509942	0.8662	0.429752	0.477032	0.172481	1.13087e-11
HDX	1.73233e-05	3.42288e-10	0.000942772	0.141109	0.0141784	0.393198	0.121126	0.373797	0.747402	0.140627	0.279042	0.819443	0.539268	0.193545	0.409479	1.13795e-11
EPHB6	1.31784e-12	2.80536e-07	0.0752669	0.0932716	0.049368	0.600315	0.132037	0.658638	0.848299	0.451686	0.705838	0.477165	0.866777	0.623074	0.445902	1.15213e-11
SOCS6	1.09376e-10	0.000863525	0.0229368	0.0194363	0.00487645	0.0330632	0.752093	0.464717	0.740874	0.0359988	0.122415	0.775559	0.448955	0.228164	0.341838	1.16263e-11
RORA	7.05235e-07	2.96998e-11	0.00516771	0.176065	0.281694	0.17221	0.197815	0.907433	0.523908	0.0699384	0.465195	0.634774	0.951696	0.34057	0.369524	1.18217e-11
ZNF486	4.46846e-09	2.72507e-09	0.0193202	0.0767016	0.345638	0.730355	0.438496	0.429343	0.275649	0.262393	0.315746	0.91325	0.780072	0.0539111	0.28719	1.18621e-11
GRIK5	0.000104333	3.50068e-09	0.021467	0.0401393	0.0306393	0.00926037	0.0581809	0.83645	0.351928	0.269408	0.0145227	0.898302	0.732093	0.148733	0.374536	1.19945e-11
CD36	1.35256e-05	2.31492e-12	0.121569	0.0378272	0.530075	0.272479	0.0210269	0.427	0.288877	0.586468	0.145455	0.953099	0.477742	0.109073	0.965531	1.20544e-11
ZCWPW1	4.84991e-10	9.89215e-10	0.802031	0.00356733	0.469618	0.450283	0.229868	0.0974551	0.495691	0.688348	0.867597	0.714029	0.683266	0.303164	0.77711	1.20792e-11
ITPR1	2.77675e-06	5.07632e-13	0.0544378	0.0455932	0.181025	0.267355	0.205565	0.885845	0.31976	0.505961	0.427833	0.812684	0.981514	0.179589	0.724224	1.20862e-11
CCNK	1.21378e-07	2.49903e-09	0.175058	0.00603685	0.00783367	0.411534	0.278171	0.538822	0.396131	0.316822	0.650736	0.638257	0.608278	0.141046	0.325825	1.22634e-11
AR	0.00023644	1.79673e-10	0.00559223	0.0150409	0.0455217	0.0365283	0.14177	0.689209	0.596558	0.232037	0.0854404	0.837653	0.619325	0.0907683	0.708027	1.23959e-11
TNS2	1.06421e-08	8.73505e-10	0.165056	0.00364135	0.0558509	0.409243	0.293225	0.755577	0.488789	0.616051	0.53097	0.710587	0.880453	0.132048	0.612793	1.23995e-11
HES2	4.97714e-06	5.3517e-13	0.578149	0.0253561	0.467427	0.577262	0.0648135	0.454985	0.270212	0.239383	0.510635	0.959637	0.606064	0.286502	0.133974	1.24033e-11
EHF	9.34421e-08	4.82808e-08	0.0376997	0.0778431	0.00517725	0.487062	0.0817933	0.910798	0.309292	0.0689759	0.343611	0.661637	0.483674	0.0711823	0.559812	1.25426e-11
CBFA2T3	1.069e-07	3.66447e-11	0.128676	0.102256	0.622797	0.701953	0.0903943	0.374906	0.683313	0.225267	0.488787	0.450933	0.581446	0.17344	0.090597	1.27144e-11
UTF1	3.80513e-06	1.5533e-10	0.0134878	0.0182894	0.0638533	0.7157	0.286683	0.21844	0.958658	0.083584	0.479104	0.694268	0.66043	0.146332	0.225025	1.29236e-11
CENPU	1.77297e-06	1.67154e-11	0.0887767	0.00767533	0.0482318	0.4058	0.349863	0.501537	0.383964	0.595595	0.256025	0.864647	0.906183	0.128172	0.596137	1.29738e-11
SFMBT2	0.000342183	3.02275e-12	0.00377999	0.0267373	0.245662	0.551372	0.276501	0.854798	0.639836	0.0653029	0.146644	0.337134	0.632021	0.135715	0.413147	1.30504e-11
MRRF	3.35016e-11	1.32148e-05	0.068831	0.0123061	0.0224756	0.713486	0.73655	0.28564	0.898777	0.0661902	0.937901	0.478274	0.289974	0.759689	0.0331444	1.31119e-11
SMARCA2	1.01203e-05	2.65984e-13	0.207838	0.0618478	0.20502	0.0988164	0.0517149	0.933724	0.307221	0.736878	0.231258	0.736962	0.910363	0.318308	0.656487	1.31899e-11
GTF2IRD2	6.38519e-08	2.97882e-10	0.32086	0.0369798	0.319374	0.0287898	0.266944	0.446203	0.267925	0.541812	0.158556	0.789139	0.508938	0.444643	0.253234	1.35435e-11
SOX17	6.00747e-06	6.23928e-11	0.0927672	0.00249933	0.22173	0.678532	0.279222	0.30332	0.716269	0.239138	0.235114	0.731502	0.854254	0.0518499	0.185961	1.39973e-11
PPP1R12B	0.000242328	6.83667e-11	0.110638	0.039931	0.141618	0.00624404	0.149682	0.737771	0.225788	0.569489	0.0142897	0.821225	0.494814	0.108207	0.46918	1.40851e-11
MYH11	0.00015566	8.0935e-09	0.0400162	0.0270896	0.0487859	0.0175243	0.0635642	0.856359	0.143796	0.259263	0.0194116	0.925767	0.465022	0.0437933	0.317382	1.42538e-11
ZNF7	8.46915e-05	2.5163e-10	0.00327559	0.00255225	0.237695	0.239267	0.561113	0.0622714	0.75656	0.281759	0.287789	0.803157	0.697907	0.0751676	0.302904	1.43316e-11
NFATC4	1.12831e-06	2.46333e-09	0.0296021	0.00513622	0.00746266	0.299681	0.430062	0.710813	0.501029	0.309079	0.450377	0.556979	0.682516	0.0443766	0.819304	1.43824e-11
FOXA1	1.62642e-05	1.92506e-09	0.0217032	0.319946	0.018703	0.102351	0.0290763	0.894893	0.108807	0.128599	0.219738	0.297253	0.397777	0.0768977	0.927326	1.44702e-11
NFYA	4.36361e-05	4.68575e-11	0.0137117	0.0128989	0.214283	0.367262	0.173463	0.0542019	0.818577	0.209495	0.520911	0.938807	0.258707	0.106613	0.457232	1.45583e-11
ZBTB7B	0.00520675	3.04285e-09	8.39181e-05	0.447591	0.0284332	0.0511657	0.0385855	0.766575	0.437162	0.0167236	0.0699541	0.97876	0.225498	0.240205	0.410958	1.46493e-11
DHCR24	1.51941e-05	5.61512e-11	0.066017	0.161994	0.230968	0.0100714	0.027403	0.782428	0.161987	0.645885	0.054193	0.532393	0.716243	0.309741	0.940424	1.46983e-11
CRLF2	2.08718e-07	1.80738e-10	0.0300588	0.0203759	0.213172	0.87809	0.291739	0.281902	0.448481	0.217924	0.386901	0.592776	0.959072	0.120374	0.313652	1.47797e-11
PRAM1	0.00117078	8.39513e-09	0.00115321	0.0065676	0.0172365	0.626274	0.479574	0.327261	0.926234	0.0320044	0.0338028	0.509384	0.968185	0.0349679	0.134759	1.49734e-11
RXRG	6.30743e-07	4.58846e-10	0.0958936	0.0157108	0.100378	0.192494	0.0703015	0.536716	0.244218	0.419426	0.227898	0.990839	0.703816	0.130487	0.439003	1.50795e-11
EBF2	0.000571297	1.03496e-10	0.000676949	0.0268588	0.0254811	0.105923	0.217668	0.96595	0.420064	0.35048	0.18002	0.742091	0.236198	0.198349	0.541408	1.53832e-11
ABCG1	1.32867e-05	2.61657e-11	0.00376602	0.00982335	0.0993197	0.422716	0.879601	0.397062	0.894051	0.170208	0.397885	0.709435	0.487871	0.183084	0.426012	1.55324e-11
GRASP	8.67146e-08	3.63569e-09	0.0744915	0.00301592	0.0703669	0.969594	0.400621	0.19766	0.708319	0.184745	0.418722	0.618131	0.984231	0.115322	0.211573	1.56462e-11
PHF21A	4.62181e-07	9.31525e-11	0.047683	0.0201418	0.0901938	0.292406	0.248111	0.732945	0.4413	0.194558	0.674906	0.668112	0.783998	0.303581	0.171798	1.57485e-11
CAV2	0.0192219	1.48543e-10	0.000353887	0.150445	0.0317764	0.094023	0.0267905	0.359297	0.211603	0.1595	0.147211	0.917854	0.260744	0.205729	0.293602	1.57512e-11
FMN2	6.5688e-06	3.94369e-09	0.0200382	0.0128626	0.0367467	0.0374769	0.0586353	0.732211	0.435446	0.417696	0.0506278	0.952901	0.996434	0.171032	0.536135	1.58464e-11
ENPP2	5.2781e-06	1.28021e-10	0.0209533	0.0902963	0.123795	0.840783	0.122051	0.185485	0.62139	0.125568	0.349104	0.290829	0.21328	0.332358	0.195805	1.64015e-11
ARHGAP10	0.000826632	9.54605e-11	0.0179369	0.0108934	0.0834093	0.0320503	0.0314098	0.926392	0.291406	0.378565	0.0527151	0.862986	0.962635	0.0841947	0.679995	1.642e-11
ZNF440	1.13612e-06	2.19005e-06	0.0151031	0.00251242	0.00291428	0.470295	0.0411068	0.44224	0.677902	0.110819	0.218059	0.916928	0.318787	0.030799	0.967657	1.65689e-11
MEIS3P1	5.55782e-11	9.06341e-06	0.0163712	0.0280707	0.101035	0.663685	0.110014	0.139401	0.783828	0.193232	0.572724	0.43639	0.980795	0.240365	0.167145	1.72883e-11
CNIH2	3.75044e-11	0.000909619	0.0216456	0.00615097	0.0204144	0.201792	0.861194	0.0453645	0.883565	0.0254307	0.43368	0.569256	0.672673	0.584392	0.227363	1.75577e-11
ARHGEF2	1.29693e-05	5.36574e-08	0.000697082	0.0104072	0.0159064	0.96704	0.772304	0.709026	0.929083	0.0328025	0.594283	0.469407	0.205884	0.101502	0.0484716	1.7696e-11
HLF	0.000186819	5.46264e-10	0.119694	0.0304588	0.141309	0.0101133	0.033179	0.806233	0.163136	0.632365	0.0106548	0.908377	0.488689	0.0891744	0.62748	1.84994e-11
HNF1B	0.0305662	1.12172e-11	0.0635572	0.239767	0.0418608	0.0378779	0.00303751	0.961897	0.308274	0.157088	0.0692961	0.254364	0.179325	0.123408	0.850252	1.85152e-11
GATA2	6.46765e-06	8.70902e-11	0.126499	0.00283442	0.566987	0.253354	0.0749153	0.478124	0.45906	0.54248	0.0867479	0.83393	0.845427	0.0613637	0.404563	1.86642e-11
PIK3CD	5.95062e-05	6.65297e-13	0.0261449	0.0448908	0.177673	0.698531	0.290152	0.490958	0.822492	0.185187	0.280347	0.338596	0.982342	0.170365	0.199028	1.87614e-11
MYO6	0.00376092	2.43163e-12	0.0477474	0.0257465	0.00540552	0.760364	0.0267993	0.594435	0.763612	0.319869	0.286954	0.499221	0.242819	0.0653517	0.970967	1.88061e-11
PTPRF	0.0198904	1.0704e-11	0.085655	0.114485	0.0870522	0.0364806	0.00267814	0.60051	0.284852	0.393393	0.0564054	0.524179	0.352259	0.0351422	0.912981	1.88928e-11
TSPYL2	5.49393e-08	2.65973e-09	0.133831	0.0179671	0.0125355	0.659415	0.226067	0.733759	0.339917	0.14923	0.479524	0.724649	0.710432	0.234302	0.284376	1.89894e-11
CLU	2.5161e-08	3.22111e-10	0.25369	0.0025396	0.418982	0.863916	0.0995058	0.0950633	0.922619	0.652609	0.624756	0.911441	0.92726	0.111995	0.63491	1.90672e-11
PURA	1.42251e-06	3.9625e-09	0.224132	0.0240156	0.537154	0.00224729	0.122624	0.427373	0.456871	0.684343	0.0207418	0.615379	0.593995	0.515891	0.174617	1.92703e-11
WWC1	3.70673e-06	2.10253e-10	0.0567224	0.281307	0.0960176	0.0482257	0.0176289	0.897621	0.172412	0.316945	0.140843	0.770912	0.465326	0.23732	0.694617	1.94422e-11
FOXF1	9.61408e-08	1.11466e-09	0.0449399	0.0163344	0.113555	0.471797	0.273109	0.737069	0.37965	0.312084	0.344082	0.770743	0.580859	0.139287	0.194129	1.95831e-11
RAB12	0.000367596	4.81679e-10	0.0549439	0.0217184	0.12634	0.0178983	0.0402667	0.212386	0.495153	0.204259	0.0786772	0.389096	0.991759	0.0785307	0.432995	1.98635e-11
ADORA1	0.000449458	5.26819e-05	0.00124415	0.00198963	0.0054092	0.135014	0.656406	0.427888	0.539927	0.00745113	0.120212	0.699592	0.0472519	0.0650165	0.0353372	2.03883e-11
PLCD4	7.60294e-07	3.01296e-10	0.393841	0.0340945	0.0743553	0.0510317	0.112616	0.788318	0.19112	0.435739	0.22969	0.608806	0.472367	0.230409	0.338539	2.04929e-11
NLRP1	1.63267e-05	5.63295e-10	0.0017164	0.110086	0.388627	0.0612548	0.328226	0.646118	0.767529	0.0602543	0.13861	0.506436	0.523401	0.375958	0.0801915	2.06602e-11
GSPT1	8.84294e-07	4.95844e-08	0.0172988	0.001312	0.138653	0.988411	0.181122	0.0581427	0.794005	0.115119	0.262846	0.9098	0.506488	0.088306	0.32805	2.10484e-11
ZNF454	0.000145582	1.7447e-11	0.0724747	0.0227362	0.0766763	0.0340918	0.148032	0.834533	0.248281	0.632806	0.0412938	0.767895	0.790863	0.116258	0.745832	2.10874e-11
ARFGAP1	0.0156639	5.43113e-13	0.126664	0.561737	0.945233	0.00755483	0.000464361	0.693743	0.650293	0.436904	0.0233466	0.371578	0.257003	0.69644	0.75958	2.1255e-11
SNCA	0.000368962	5.47206e-13	0.168362	0.0253348	0.385301	0.0861665	0.0350713	0.116386	0.614525	0.773622	0.124921	0.893203	0.809717	0.100294	0.929407	2.12772e-11
NFIC	1.87647e-05	1.34895e-10	0.398893	0.000407943	0.128004	0.30061	0.255908	0.223682	0.515399	0.452185	0.291034	0.723022	0.625023	0.0699541	0.240341	2.12873e-11
TTF2	4.22101e-08	1.72837e-08	0.0508599	0.00203432	0.10294	0.660657	0.338149	0.0369371	0.827989	0.509696	0.594395	0.768543	0.726082	0.0639037	0.820902	2.13998e-11
CERS4	1.76724e-10	1.15048e-06	0.0432437	0.0780328	0.0343871	0.81034	0.129639	0.444425	0.618175	0.171921	0.427507	0.526752	0.907913	0.0831744	0.236568	2.14032e-11
GATA3	0.000160838	6.58874e-10	0.00309313	0.036372	0.0984025	0.91314	0.428031	0.331969	0.67334	0.0191987	0.241708	0.679132	0.764864	0.0565384	0.03399	2.1536e-11
SOX15	1.50362e-05	1.73482e-10	0.0508366	0.00512821	0.0571503	0.127777	0.123764	0.566268	0.539594	0.413678	0.258131	0.816259	0.812579	0.0892864	0.403741	2.16964e-11
ZNF471	1.81785e-07	4.66031e-10	0.0394845	0.0429839	0.148749	0.128982	0.0578548	0.890986	0.205981	0.396431	0.245001	0.897254	0.846091	0.350731	0.634236	2.17285e-11
EBF4	7.94777e-07	2.14476e-07	0.0146161	0.00336649	0.00270041	0.585049	0.273326	0.491286	0.554961	0.174421	0.424644	0.690502	0.881868	0.0285134	0.388854	2.21846e-11
CD69	0.000138606	2.95816e-13	0.0403437	0.0981613	0.54677	0.503077	0.0253466	0.572941	0.615599	0.261017	0.457692	0.583882	0.290931	0.0827335	0.738026	2.22168e-11
ADAP2	0.00787576	1.40688e-12	0.00592201	0.0115995	0.0707346	0.769999	0.568627	0.762562	0.782941	0.134699	0.0764794	0.327502	0.250189	0.0735202	0.56851	2.22769e-11
ZNF358	9.00462e-07	2.71228e-08	0.0296594	0.00127052	0.0290264	0.929071	0.290908	0.0904629	0.629498	0.184645	0.447145	0.721546	0.895814	0.047772	0.474733	2.23137e-11
RAB33B	0.0266566	6.43911e-10	0.00364441	0.479597	0.695912	5.59265e-05	0.0574295	0.576942	0.368362	0.515691	0.000605147	0.915191	0.790236	0.206811	0.767646	2.27528e-11
DLC1	0.000201754	1.15354e-10	0.00109649	0.0246608	0.189489	0.25665	0.721558	0.848918	0.432704	0.268092	0.074895	0.9528	0.308908	0.0285494	0.384689	2.32849e-11
ZC3H14	1.78091e-09	0.000258272	0.056994	0.025427	0.0236278	0.500958	0.39682	0.00355435	0.630582	0.0465067	0.840867	0.44858	0.543846	0.328429	0.0241354	2.3424e-11
FGFR4	0.0241193	3.34894e-13	0.100376	0.647278	0.412483	0.00451226	0.0011096	0.973343	0.423319	0.805698	0.024224	0.355673	0.403557	0.527047	0.80851	2.35048e-11
RAB2B	0.00101346	4.09584e-09	0.00550895	0.418532	0.225788	0.00118554	0.00652058	0.793855	0.134793	0.437882	0.00752499	0.457902	0.949741	0.340011	0.649484	2.45815e-11
NRG2	1.00354e-08	5.35613e-09	0.0736116	0.0214972	0.0785833	0.752468	0.0939778	0.402667	0.994125	0.376404	0.477452	0.428611	0.979732	0.0935461	0.431519	2.49327e-11
SLC7A3	2.11754e-07	1.66559e-10	0.194732	0.000817281	0.343425	0.893883	0.257326	0.311966	0.659864	0.556443	0.580924	0.688243	0.712387	0.0914273	0.441362	2.51726e-11
ZFP3	2.5446e-13	0.00233601	0.0645253	0.246414	0.0529342	0.821819	0.102506	0.682287	0.0767518	0.16167	0.951852	0.494244	0.659744	0.0162165	0.325662	2.52083e-11
TAF3	5.11907e-07	9.00752e-05	0.00135387	0.074715	0.188095	0.0279636	0.259452	0.351263	0.147949	0.0316438	0.152228	0.36851	0.847772	0.210479	0.00562954	2.53707e-11
SRPK1	3.09334e-06	3.42272e-10	0.050457	0.00223056	0.0503322	0.848601	0.290157	0.148738	0.622152	0.355386	0.310404	0.859585	0.80917	0.0722839	0.77849	2.53769e-11
CASK	0.0026061	5.03144e-12	0.216689	0.0107842	0.0445099	0.458769	0.00298521	0.311214	0.72639	0.196869	0.355946	0.560407	0.441316	0.0864858	0.971688	2.61816e-11
CXXC5	1.92609e-12	0.457599	0.0154835	0.0386248	0.0495409	0.0214101	0.151408	0.0710875	0.460603	0.1321	0.119175	0.259797	0.727797	0.125275	0.600029	2.63488e-11
MECP2	2.07804e-08	1.6295e-08	0.109859	0.00857596	0.00710685	0.684118	0.742488	0.63888	0.330975	0.26283	0.792527	0.465736	0.547831	0.148798	0.331375	2.69233e-11
KLF17	2.45703e-05	1.46453e-07	0.000490738	0.0344704	0.0200916	0.0373688	0.442027	0.405827	0.482732	0.0723339	0.130762	0.650989	0.394137	0.206258	0.325723	2.71486e-11
PLAT	1.0921e-07	1.24948e-08	0.00481834	0.00293442	0.161622	0.721667	0.697406	0.199249	0.97627	0.204663	0.754848	0.482446	0.681163	0.277777	0.153606	2.76566e-11
CREB5	0.00167296	2.07817e-11	0.000349107	0.130476	0.270318	0.0250947	0.18377	0.838929	0.841579	0.0733919	0.100399	0.96754	0.230517	0.38772	0.785678	2.87992e-11
KLF5	4.41583e-07	2.6333e-10	0.136782	0.0370513	0.0100037	0.883185	0.135706	0.743496	0.424146	0.451165	0.210549	0.738033	0.563246	0.112167	0.709429	2.88727e-11
RERGL	8.33072e-05	4.19803e-13	0.272985	0.0354103	0.547536	0.0649009	0.0298798	0.235239	0.694305	0.778461	0.17546	0.991632	0.537005	0.175344	0.940071	2.89584e-11
FHL5	6.16401e-06	2.75887e-12	0.0186432	0.0205276	0.316781	0.440771	0.230611	0.839423	0.594545	0.435222	0.406408	0.788242	0.44444	0.166183	0.653919	2.90004e-11
RBBP8	2.37504e-08	3.90073e-09	0.0249214	0.00863867	0.0598737	0.685916	0.352879	0.473637	0.588068	0.401349	0.616846	0.786331	0.591555	0.0982988	0.777344	2.91304e-11
P2RY12	9.31731e-06	1.69395e-11	0.0290522	0.07967	0.172924	0.555599	0.147483	0.453784	0.119226	0.290679	0.204206	0.645664	0.597053	0.144461	0.769998	2.92664e-11
NXN	0.000274105	1.19293e-09	0.0137372	0.00256645	0.00844206	0.354838	0.256981	0.473411	0.618653	0.170085	0.241266	0.533824	0.964165	0.0628056	0.211309	2.97515e-11
WASL	2.79764e-09	4.07984e-05	0.0161854	0.0587703	0.0147877	0.127582	0.959855	0.286911	0.65402	0.0707519	0.182861	0.33694	0.339621	0.144564	0.0939951	3.01708e-11
PRKCI	5.98476e-06	6.28211e-09	0.00277395	0.0770487	0.0765682	0.621366	0.121915	0.169356	0.71829	0.0937112	0.35742	0.451064	0.408928	0.0232689	0.916449	3.03172e-11
PHOX2A	9.31697e-07	4.25291e-07	0.0485705	0.00972019	0.021598	0.0476765	0.0905046	0.8397	0.0927904	0.282628	0.0733658	0.64376	0.715172	0.15567	0.375219	3.0637e-11
IRS1	2.52173e-07	1.45252e-07	0.000435689	0.0237295	0.0168844	0.991354	0.774093	0.911356	0.558854	0.0370233	0.681976	0.707415	0.759902	0.13506	0.16826	3.1044e-11
AFDN	0.260737	1.42099e-12	0.0711292	8.52157e-05	0.128997	0.942915	0.0483838	0.307474	0.91823	0.191261	0.137808	0.870368	0.163367	0.0984356	0.559975	3.10442e-11
S1PR1	8.91056e-06	8.50753e-12	0.0472852	0.0121381	0.327551	0.563261	0.378169	0.853314	0.37699	0.45469	0.177734	0.827012	0.683744	0.0373286	0.465627	3.11902e-11
GPR183	0.00192127	2.09144e-14	0.0525032	0.176367	0.535311	0.317883	0.071154	0.937818	0.451339	0.134288	0.185698	0.478318	0.617042	0.0651538	0.862492	3.15841e-11
ZNF26	7.01111e-07	1.16046e-10	0.0524081	0.010685	0.167284	0.877421	0.0578486	0.848009	0.498872	0.562226	0.815683	0.219662	0.745056	0.184798	0.348005	3.16218e-11
PDZD8	6.31657e-08	6.7528e-09	0.0934016	0.0394316	0.223517	0.537627	0.043639	0.111537	0.768522	0.170194	0.650475	0.645854	0.591206	0.0594249	0.46046	3.24286e-11
ZDHHC19	2.56799e-08	6.96212e-08	0.046431	0.0220973	0.0745076	0.708069	0.180739	0.318222	0.668706	0.129913	0.379326	0.442378	0.618626	0.0966313	0.172	3.29499e-11
ASB14	0.000331467	0.00183266	7.72916e-05	0.852086	0.0402234	2.11003e-05	0.047703	0.961242	0.10343	0.313329	0.00026265	0.856473	0.400467	0.366229	0.504483	3.3115e-11
ARFGEF2	0.0509808	1.68975e-11	0.0458024	0.005361	0.173784	0.436244	0.010345	0.0684246	0.763244	0.0965739	0.19368	0.860581	0.148788	0.0725368	0.567929	3.35587e-11
GLI2	0.000980224	4.43025e-10	0.00131397	0.0118178	0.00663152	0.251103	0.601382	0.680283	0.613347	0.182607	0.302575	0.797564	0.243771	0.112912	0.250727	3.36203e-11
BEX3	5.08354e-08	5.38254e-06	0.00619987	0.0235642	0.0580986	0.913357	0.131763	0.0288023	0.286616	0.0435014	0.543378	0.683267	0.218262	0.282847	0.379154	3.40742e-11
POLR3G	3.78317e-15	0.00830651	0.0452772	0.053392	0.443469	0.0175012	0.724444	0.275635	0.883445	0.550139	0.112533	0.647752	0.689335	0.535124	0.574024	3.43948e-11
ZNF662	2.37531e-08	7.17402e-10	0.0455019	0.0999272	0.260194	0.170795	0.0313038	0.260609	0.942363	0.446544	0.366791	0.943955	0.942711	0.545767	0.427721	3.49051e-11
RAB36	2.27162e-05	1.8461e-06	0.00214785	0.00526478	0.00497038	0.166542	0.0646875	0.622781	0.968657	0.0766341	0.0814696	0.525749	0.492398	0.169612	0.2157	3.50555e-11
ADRA1A	1.26302e-05	1.96074e-11	0.0125791	0.0377074	0.225889	0.287658	0.169502	0.314995	0.851895	0.295843	0.270442	0.844416	0.565141	0.197142	0.349855	3.5301e-11
POU5F1	0.00132939	8.90982e-08	0.00319929	0.0936061	0.000631125	0.590734	0.142685	0.785602	0.0878523	0.014991	0.106942	0.907596	0.223025	0.0521214	0.417834	3.54793e-11
FUBP1	3.11517e-06	9.5255e-11	0.159852	0.00300677	0.281011	0.246623	0.169945	0.128009	0.351816	0.6456	0.366804	0.760428	0.918648	0.145263	0.50726	3.55306e-11
OVOL1	3.58827e-05	1.537e-13	0.340488	0.00966446	0.156728	0.793249	0.0296642	0.694665	0.507349	0.621406	0.517105	0.779552	0.824776	0.318331	0.604431	3.59812e-11
NPAS4	0.000111703	1.51345e-10	0.0659066	0.0138384	0.0785539	0.0516262	0.0876913	0.750167	0.248116	0.411971	0.0707718	0.895208	0.688319	0.0913202	0.567705	3.6352e-11
GAP43	0.000133819	9.83507e-10	0.0350823	0.02978	0.124875	0.0283285	0.121751	0.428212	0.275464	0.302649	0.0171564	0.839212	0.940591	0.0990689	0.336804	3.6489e-11
CHP1	9.3818e-06	1.27982e-05	0.000396765	0.194745	0.000306787	0.827674	0.360074	0.938127	0.263775	0.00324183	0.366188	0.577262	0.388644	0.0412932	0.416175	3.66433e-11
GNG2	0.000157175	2.23911e-14	0.0609301	0.0268482	0.551499	0.798181	0.220306	0.688254	0.867157	0.323631	0.291465	0.415859	0.351434	0.300863	0.700455	3.68541e-11
EAF1	1.77646e-08	1.07185e-07	0.163332	0.0149698	0.0423218	0.564078	0.212428	0.153779	0.193948	0.236541	0.375513	0.567689	0.98922	0.0635417	0.447011	3.76992e-11
ADGRL2	2.11143e-09	1.03704e-08	0.0158286	0.0584809	0.135633	0.463288	0.277719	0.431576	0.9182	0.273921	0.765474	0.773404	0.379603	0.264284	0.448279	3.83958e-11
ZFP1	0.000978798	5.84712e-09	0.00119226	0.223635	0.0145485	0.0409644	0.0346598	0.815167	0.261712	0.0500477	0.140173	0.901087	0.26055	0.228411	0.41406	3.91074e-11
PHF1	2.48235e-06	3.84539e-09	0.0398143	0.00170411	0.0244692	0.857187	0.287586	0.142609	0.698549	0.222403	0.575294	0.819181	0.941253	0.0388738	0.709703	3.94367e-11
VAPB	0.00077537	6.67357e-12	0.181466	0.0820981	0.366741	0.0776114	0.0353769	0.158291	0.174517	0.146599	0.096694	0.681774	0.63898	0.898469	0.0895053	3.95945e-11
TMOD2	9.70927e-10	3.01263e-08	0.0273698	0.0947094	0.157155	0.254098	0.469409	0.573995	0.345788	0.180326	0.607258	0.781009	0.734628	0.14599	0.414014	3.97722e-11
HEY2	1.84924e-05	4.94014e-10	0.0171727	0.0027944	0.0802978	0.419209	0.259872	0.689302	0.526142	0.272711	0.267694	0.80168	0.598173	0.0946154	0.237022	4.03478e-11
RASGRF1	8.90503e-16	0.00165305	0.17603	0.0204511	0.113181	0.655653	0.830098	0.138679	0.786062	0.325437	0.707476	0.932679	0.977868	0.638456	0.230213	4.05256e-11
HMX2	5.44221e-15	0.00519202	0.103559	0.0459203	0.0204176	0.708079	0.0634814	0.566058	0.709349	0.3129	0.50349	0.737551	0.882972	0.538452	0.410105	4.11772e-11
CENPF	1.42128e-05	9.8087e-12	0.0930314	0.00188159	0.394454	0.845041	0.201466	0.0974418	0.637783	0.88232	0.470389	0.928817	0.831623	0.039492	0.880106	4.15345e-11
SIN3B	3.89239e-06	3.64396e-10	0.0278357	0.00602424	0.0105515	0.310679	0.647376	0.631299	0.745363	0.336106	0.536808	0.322753	0.991199	0.282906	0.297122	4.2016e-11
PER1	6.52164e-06	1.21869e-12	0.0860683	0.0221805	0.0791079	0.744038	0.322022	0.34835	0.85053	0.436022	0.810839	0.92073	0.941693	0.0807697	0.546819	4.20499e-11
FANCE	6.01611e-07	1.04297e-11	0.130314	0.0206099	0.804111	0.275557	0.0703478	0.068212	0.952268	0.652269	0.433353	0.950952	0.565091	0.501233	0.89365	4.22511e-11
ADIPOQ	0.00321215	8.72588e-13	0.123368	0.00183288	0.216344	0.257447	0.0286437	0.12468	0.947888	0.739168	0.202453	0.8243	0.253903	0.388241	0.812208	4.27766e-11
PPP1R10	0.233053	1.12443e-12	0.000227265	0.314242	0.446178	0.0659338	0.0748292	0.421406	0.563197	0.0315213	0.0946382	0.498869	0.418252	0.336834	0.580152	4.30245e-11
ESF1	0.00474583	3.18974e-12	0.00773151	0.0112089	0.0680155	0.398801	0.309076	0.318784	0.630825	0.409791	0.131559	0.420951	0.416245	0.0717304	0.798796	4.32373e-11
FOXI2	1.80714e-09	3.20624e-10	0.32073	0.00916376	0.310581	0.531276	0.539832	0.29116	0.780964	0.491695	0.828223	0.87407	0.652186	0.697186	0.215222	4.33556e-11
CCR10	9.32077e-07	3.25e-10	0.16334	0.00376561	0.272062	0.928361	0.309238	0.0878698	0.718741	0.235394	0.380689	0.867883	0.868701	0.176108	0.112071	4.4006e-11
SOX14	0.00180285	3.92965e-10	0.00116342	0.0815564	0.149023	0.698588	0.08	0.293055	0.976374	0.00905193	0.511523	0.375288	0.43252	0.0683427	0.150216	4.4289e-11
ZNF485	4.26426e-06	2.61261e-10	0.0244513	0.00239393	0.131877	0.999302	0.399611	0.0490857	0.921025	0.44018	0.617637	0.857882	0.739662	0.0633186	0.737999	4.47086e-11
SOX5	1.14917e-08	1.28117e-09	0.0249344	0.0691178	0.120556	0.386137	0.264881	0.76255	0.406298	0.284984	0.515148	0.942338	0.86317	0.306295	0.35652	4.50411e-11
NPY1R	2.13774e-08	1.06113e-09	0.0256028	0.116318	0.178558	0.74167	0.0613958	0.403014	0.691726	0.375069	0.397167	0.876456	0.849795	0.231511	0.325409	4.54651e-11
SATB2	5.04015e-06	6.1876e-11	0.233668	0.000629326	0.240157	0.721086	0.336433	0.0602041	0.94512	0.472195	0.88114	0.996623	0.830336	0.082108	0.29785	4.54727e-11
TNFRSF10A	4.02231e-12	1.49503e-05	0.0584181	0.123245	0.0427722	0.661356	0.148751	0.712987	0.179372	0.228811	0.691899	0.765247	0.766111	0.123975	0.486807	4.61359e-11
FOXD1	0.000186063	2.75998e-14	0.204549	0.00642705	0.480856	0.677634	0.215308	0.223103	0.990258	0.533186	0.48714	0.796144	0.968133	0.0773382	0.805584	4.61377e-11
GPR146	6.02051e-07	3.09203e-10	0.118864	0.00120032	0.16221	0.960851	0.282002	0.201754	0.704155	0.366098	0.564696	0.871066	0.801885	0.0867233	0.632595	4.63677e-11
ZNF823	0.000177519	1.49717e-10	0.053067	0.00673275	0.00955873	0.948685	0.122655	0.578115	0.661483	0.386748	0.141386	0.60527	0.632138	0.0248698	0.635248	4.69285e-11
TRIP13	4.33309e-07	3.80327e-12	0.234008	0.0107128	0.306089	0.637651	0.28972	0.245837	0.531252	0.763951	0.654141	0.943605	0.897156	0.153026	0.699075	4.81322e-11
ARFGEF3	0.258409	1.06075e-10	0.00570188	0.0614998	0.0206868	0.039577	0.0274737	0.332656	0.499999	0.167114	0.0126153	0.707046	0.408451	0.074615	0.854631	4.85339e-11
TIAM1	1.71593e-07	4.24015e-10	0.0695377	0.0310755	0.164709	0.249228	0.133307	0.71974	0.942427	0.297422	0.278753	0.75647	0.302583	0.264184	0.483662	4.90276e-11
HOXA3	1.71775e-08	1.33276e-05	0.0153646	0.0593316	0.0458879	0.0365294	0.402088	0.405506	0.233867	0.0999375	0.196069	0.598356	0.511832	0.0819137	0.219372	4.9635e-11
TGFBR3	0.000650771	3.39807e-12	0.0480892	0.0398208	0.197972	0.067556	0.0863429	0.606194	0.383222	0.431143	0.036153	0.838413	0.53303	0.30617	0.630001	5.18936e-11
DMD	2.90468e-07	5.51493e-10	0.0452888	0.0337306	0.209043	0.0997115	0.123239	0.848773	0.369394	0.595443	0.199074	0.905539	0.866408	0.149729	0.558295	5.2043e-11
SALL2	1.77517e-07	5.73313e-08	0.00945016	0.0134114	0.0114921	0.356696	0.148139	0.673905	0.685021	0.271791	0.398948	0.82573	0.664407	0.125524	0.574848	5.2549e-11
CHAF1B	7.82284e-07	7.69471e-12	0.164282	0.0177277	0.36662	0.137205	0.21244	0.377872	0.695808	0.745608	0.321474	0.97125	0.867613	0.236774	0.662709	5.27775e-11
LY96	0.000885266	2.14981e-11	0.00654889	0.0330298	0.364849	0.842399	0.196568	0.273149	0.917797	0.120889	0.157417	0.798196	0.159943	0.0283805	0.363254	5.27919e-11
PSIP1	0.0191418	1.09632e-10	0.00819304	0.535657	0.20769	0.00245915	0.00728221	0.979526	0.124414	0.519921	0.0082379	0.328756	0.642758	0.442293	0.942618	5.31342e-11
TCF23	3.04732e-07	9.89401e-09	0.0263776	0.00448367	0.0796463	0.130067	0.18474	0.258646	0.894139	0.390818	0.212929	0.934909	0.357122	0.450721	0.811908	5.38782e-11
ACAD8	0.00132421	4.29003e-07	1.46728e-05	0.0824354	0.00402085	0.152226	0.571113	0.704184	0.848215	0.0369425	0.154125	0.84589	0.098576	0.151651	0.160929	5.5327e-11
OR10X1	0.00103163	4.36368e-08	0.000618495	0.484295	0.00608171	0.0331135	0.118268	0.486583	0.231233	0.0259982	0.132718	0.437537	0.177442	0.684994	0.256107	5.62185e-11
LMO1	0.00112548	7.50928e-08	0.0797873	0.0219394	0.0197327	0.0098126	0.0283937	0.904893	0.104889	0.292015	0.00559308	0.629531	0.448007	0.0951344	0.509735	5.687e-11
EPHA1	2.27164e-06	2.18738e-10	0.182156	0.394195	0.0474363	0.207873	0.0192365	0.832693	0.110816	0.227914	0.384118	0.692697	0.96411	0.12351	0.386797	5.7361e-11
PPP2R5D	1.57647e-05	4.93753e-09	0.00297678	0.362576	0.473313	0.0257851	0.0598048	0.191631	0.346897	0.197453	0.110717	0.896808	0.075274	0.960794	0.305408	5.78745e-11
PTK2	0.000374993	1.78918e-08	0.00389963	0.066788	0.0303386	0.805887	0.589575	0.000680978	0.159103	0.0811559	0.398371	0.702427	0.391869	0.271113	0.268348	5.79166e-11
CASP3	9.75504e-10	7.33921e-07	0.0368505	0.0313101	0.00180592	0.545328	0.600981	0.551638	0.37068	0.291401	0.827418	0.631273	0.901842	0.293426	0.445621	5.85894e-11
SRC	0.062055	5.24434e-12	0.0441053	0.430249	0.115512	0.0290198	0.00180193	0.944508	0.346243	0.285748	0.0246611	0.655229	0.220463	0.215851	0.673519	5.88578e-11
LIN54	4.04233e-11	4.76192e-05	0.00649074	0.0119218	0.160142	0.307402	0.731197	0.0573391	0.929938	0.269856	0.498761	0.784991	0.507462	0.124726	0.953662	5.92956e-11
NCOA7	2.22815e-07	1.81622e-08	0.107146	0.0292855	0.0144799	0.205609	0.0853523	0.699788	0.294084	0.202362	0.230135	0.509792	0.696116	0.230474	0.721648	5.93461e-11
RHOB	0.00277698	5.82509e-10	0.0440471	0.00274855	0.0259784	0.25385	0.0818503	0.509702	0.37695	0.237138	0.203773	0.671848	0.398609	0.0282798	0.248916	5.99502e-11
POLR3C	0.000203722	3.67181e-12	0.0949356	0.0123101	0.176943	0.32214	0.322922	0.06434	0.668557	0.211062	0.684782	0.93372	0.465116	0.641342	0.0671703	6.0471e-11
ISL1	5.08267e-06	4.55378e-10	0.110589	0.00787222	0.218609	0.13289	0.202707	0.35249	0.215211	0.640363	0.17838	0.8076	0.593418	0.0639842	0.625737	6.29084e-11
HNF1A	0.00427524	1.33777e-13	0.106562	0.153209	0.235001	0.0348029	0.00643355	0.743799	0.73736	0.526453	0.167261	0.454463	0.368656	0.569826	0.884698	6.36516e-11
DNM2	1.63477e-07	1.68772e-07	0.00508305	0.329474	0.0379981	0.0955784	0.110776	0.661311	0.282086	0.0591258	0.202918	0.940271	0.636918	0.22096	0.364446	6.37091e-11
ZC3H8	7.52371e-05	5.23613e-10	0.0145942	0.00242413	0.0442071	0.178642	0.578355	0.116458	0.743523	0.386848	0.156744	0.918419	0.929415	0.0897681	0.790786	6.41543e-11
ZNF385B	0.00331632	3.54449e-12	0.00520986	0.0407713	0.0452426	0.155552	0.090636	0.539465	0.821201	0.259429	0.146582	0.992476	0.449571	0.268308	0.637874	6.47144e-11
STAMBP	6.45259e-07	1.25897e-09	0.00673536	0.133898	0.032707	0.321703	0.474191	0.783459	0.954227	0.198381	0.26675	0.675301	0.488004	0.067382	0.639157	6.48004e-11
MYBL1	2.18871e-05	2.60532e-08	0.0028776	0.195959	0.0282442	0.0374788	0.0360946	0.965472	0.285792	0.101487	0.122332	0.322883	0.695101	0.388593	0.562316	6.5072e-11
LITAF	0.0001321	5.89444e-08	0.00308342	0.00739019	0.0541093	0.227448	0.639223	0.143272	0.74478	0.0703009	0.268093	0.60052	0.243153	0.0315272	0.16074	6.53857e-11
PRKCZ	5.55475e-06	7.74634e-11	0.014092	0.271788	0.0392625	0.290093	0.0285207	0.753836	0.667684	0.256688	0.542558	0.860927	0.33703	0.336323	0.592519	6.75568e-11
GPC3	5.10552e-12	0.000192203	0.0242403	0.00728211	0.162702	0.51811	0.511221	0.464619	0.75933	0.363727	0.286748	0.511518	0.265164	0.218786	0.266548	6.76223e-11
HOXA2	3.559e-08	3.64107e-07	0.117167	0.0576487	0.0617462	0.0349727	0.0873684	0.459508	0.174831	0.342205	0.13364	0.472758	0.838171	0.126159	0.727359	6.83995e-11
LEO1	3.06162e-09	6.69027e-07	0.152268	0.00320888	0.0398444	0.960625	0.35755	0.202054	0.770605	0.111654	0.73108	0.499756	0.789221	0.201935	0.159697	6.85883e-11
ADGRD1	2.29949e-06	8.96246e-10	0.0219144	0.102866	0.0452669	0.0920112	0.324785	0.505162	0.828139	0.344774	0.235802	0.597504	0.649905	0.0597293	0.448997	6.88604e-11
MUSK	8.70155e-08	2.53654e-11	0.115417	0.153582	0.583386	0.414682	0.0803338	0.280425	0.605363	0.63268	0.247514	0.624136	0.469503	0.585095	0.657998	7.01173e-11
WASF2	8.1343e-06	1.16088e-11	0.222149	0.0134376	0.0598098	0.251786	0.33537	0.615077	0.272479	0.69838	0.531914	0.502315	0.646402	0.132687	0.597481	7.01446e-11
ZNF334	8.2777e-10	1.82557e-06	0.0249784	0.0959236	0.104688	0.718921	0.0471991	0.193216	0.961408	0.234084	0.55725	0.543267	0.46232	0.0846307	0.348165	7.07183e-11
ZNF606	6.82568e-10	1.35728e-07	0.0234425	0.266082	0.206316	0.492125	0.240039	0.955403	0.218703	0.242456	0.426941	0.749436	0.823337	0.0248387	0.495025	7.08254e-11
MAGED1	5.49322e-14	0.0101438	0.0404084	0.0593053	0.0879417	0.165746	0.501334	0.210925	0.511224	0.149768	0.306486	0.496499	0.81809	0.56898	0.209009	7.1325e-11
CALCOCO1	0.000172301	4.27293e-12	0.120988	0.0271799	0.144505	0.0944811	0.0972413	0.435932	0.379409	0.697229	0.110076	0.94034	0.751141	0.122674	0.661417	7.14483e-11
ARHGAP11A	3.56039e-08	6.50521e-08	0.0167471	0.00521592	0.17854	0.646963	0.498332	0.0241302	0.936112	0.442832	0.671059	0.646699	0.633161	0.0884286	0.831254	7.17792e-11
ATOH8	9.06473e-08	2.28495e-09	0.20771	0.00388659	0.115488	0.648857	0.24823	0.466581	0.390354	0.641407	0.451816	0.836164	0.605998	0.0512712	0.576054	7.41419e-11
EPHA3	6.48124e-08	3.56553e-09	0.0106606	0.10978	0.251991	0.115297	0.370221	0.705071	0.460219	0.303227	0.310634	0.646084	0.892462	0.125441	0.382044	7.4144e-11
FOXJ1	0.0451548	2.05358e-14	0.0251095	0.116788	0.400441	0.105304	0.24456	0.703239	0.137358	0.262109	0.0594198	0.712041	0.786978	0.129571	0.80338	7.42316e-11
TAF5L	2.53583e-08	1.68837e-09	0.110091	0.0245887	0.419362	0.295849	0.196291	0.072775	0.639254	0.428163	0.660991	0.793487	0.724562	0.239721	0.482015	7.441e-11
GSC	3.96145e-11	0.00178144	0.0196085	0.0276064	0.0243937	0.182991	0.659926	0.090364	0.360429	0.114965	0.504802	0.318832	0.952279	0.123066	0.310642	7.44144e-11
STAP1	2.40855e-05	2.14932e-11	0.0293292	0.336428	0.55387	0.699841	0.103511	0.178701	0.281135	0.124914	0.301891	0.585626	0.978979	0.0917043	0.122181	7.49842e-11
MED24	0.00446399	5.87934e-10	0.00135641	0.194158	0.521345	0.00299674	0.0294419	0.43408	0.326383	0.301842	0.0268801	0.914969	0.591178	0.204635	0.631996	7.63834e-11
GNB5	2.59487e-11	4.60812e-06	0.108012	0.0331083	0.00487786	0.710616	0.31245	0.280322	0.954853	0.38226	0.632722	0.749254	0.654835	0.242747	0.716508	7.6427e-11
ZNF382	1.51729e-07	1.39773e-09	0.0229749	0.0874487	0.109375	0.138615	0.13362	0.936276	0.354392	0.181612	0.381369	0.921319	0.967035	0.44822	0.326613	7.70689e-11
HOXD8	2.48743e-06	1.82375e-08	0.0106944	0.0221105	0.0899041	0.789146	0.156985	0.679871	0.684774	0.131015	0.242976	0.823538	0.200192	0.0225462	0.399046	7.79363e-11
GIT2	0.000826647	1.42652e-12	0.0199086	0.0190301	0.304778	0.116046	0.117033	0.969543	0.281578	0.321243	0.101785	0.62991	0.668975	0.415153	0.910474	7.80038e-11
MED20	0.000474059	1.4518e-12	0.0476705	0.0810961	0.447545	0.0151013	0.399204	0.301471	0.797534	0.247869	0.0813287	0.587148	0.660055	0.820625	0.238077	7.81163e-11
MED29	1.8786e-07	0.000216372	0.0112305	0.004936	0.00463226	0.0847415	0.72807	0.114496	0.669694	0.167054	0.231805	0.690489	0.345655	0.0302549	0.196619	7.9892e-11
PITX2	4.38026e-07	8.992e-07	0.00179676	0.0826339	0.0709952	0.0272225	0.171764	0.503723	0.977931	0.0787823	0.121334	0.563028	0.536507	0.326755	0.301053	7.99247e-11
AKAP12	6.15757e-05	1.16599e-10	0.0110982	0.0345407	0.151474	0.0460835	0.256731	0.607588	0.738602	0.322966	0.109638	0.830808	0.969042	0.118441	0.369105	8.08535e-11
ZNF761	0.000732967	6.38161e-10	0.00285174	0.000669367	0.120535	0.759641	0.402472	0.0402154	0.892041	0.278631	0.351142	0.96818	0.579365	0.0545699	0.787098	8.13769e-11
BCL6	1.25796e-05	2.02247e-10	0.013184	0.03698	0.0129068	0.462822	0.0996413	0.728813	0.576902	0.178299	0.529731	0.779815	0.656258	0.262372	0.716602	8.22204e-11
SLC30A9	6.20648e-11	0.00550006	0.00222716	0.106111	0.00498444	0.697176	0.808799	0.203701	0.530725	0.0094725	0.898919	0.517726	0.53925	0.121262	0.399496	8.22611e-11
ZNF610	8.89339e-07	1.99102e-10	0.0130153	0.0957373	0.157977	0.231168	0.196302	0.677822	0.313945	0.389257	0.407782	0.932742	0.762967	0.144601	0.513865	8.23093e-11
ELL3	2.42131e-07	4.74568e-05	0.00160057	0.0615585	0.000197705	0.431912	0.728967	0.77496	0.832866	0.00931319	0.611535	0.806208	0.706638	0.3252	0.0593395	8.2807e-11
PLCH1	0.00228804	1.46125e-09	0.0366708	0.119118	0.00887017	0.159792	0.0114645	0.70693	0.897617	0.0621795	0.314729	0.130114	0.235249	0.0372686	0.847684	8.28448e-11
ERBB2	0.0130223	1.49956e-11	0.0973024	0.192191	0.0847878	0.0419391	0.000947167	0.569364	0.208695	0.620737	0.0266836	0.546756	0.365864	0.647001	0.918424	8.34448e-11
ARHGEF9	0.000286303	2.09877e-11	0.367161	0.0149493	0.17159	0.0362024	0.0620088	0.716164	0.210648	0.789708	0.0348222	0.949566	0.497539	0.250654	0.478225	8.57606e-11
ZC3H12A	0.000753234	4.36402e-10	0.00429536	0.236209	0.066888	0.0131613	0.0570211	0.888287	0.141005	0.239846	0.0547606	0.850776	0.202029	0.832762	0.777991	8.75214e-11
SMYD1	0.00234523	2.63509e-08	0.0754746	0.0212132	0.0360995	0.00572785	0.0549851	0.888244	0.155552	0.422911	0.00289858	0.824426	0.455541	0.0788259	0.544453	8.76067e-11
ETV4	0.000670002	5.31487e-14	0.662411	0.0417648	0.528733	0.291689	0.0473164	0.558531	0.318588	0.234334	0.321587	0.884239	0.382641	0.552106	0.170877	8.77392e-11
DLX5	4.35861e-05	4.18261e-06	0.00052438	0.00692555	0.00196091	0.679553	0.228211	0.648589	0.709736	0.0199153	0.445384	0.710935	0.187609	0.132523	0.216565	8.92177e-11
WDR12	3.82611e-08	2.84096e-09	0.161632	0.00355971	0.128273	0.946237	0.591501	0.0628691	0.880104	0.226604	0.917334	0.893308	0.689767	0.485975	0.204168	8.94429e-11
MTDH	2.47154e-06	7.65552e-07	0.0034455	0.00540962	0.0130262	0.208159	0.509911	0.0765473	0.781835	0.0916317	0.24952	0.778215	0.732781	0.131869	0.635268	9.00778e-11
FCGR2C	2.79015e-05	2.58125e-10	0.00123316	0.15697	0.433311	0.113685	0.20969	0.963247	0.247228	0.0290582	0.406106	0.562568	0.88371	0.407005	0.396032	9.12467e-11
GRAP	2.26066e-08	3.62517e-06	0.0048629	0.0582431	0.0206222	0.341023	0.501906	0.281708	0.561134	0.0970899	0.159888	0.610168	0.398999	0.168995	0.392244	9.12805e-11
ZNF385A	0.000617919	6.427e-08	0.0056556	0.00299667	0.00620028	0.591211	0.56633	0.241524	0.943199	0.0632927	0.193316	0.695166	0.388085	0.0146868	0.21087	9.14808e-11
FOXN3	5.1002e-06	5.32649e-12	0.412449	0.0238641	0.270555	0.0821516	0.279557	0.597264	0.296223	0.741848	0.210034	0.966781	0.456551	0.322543	0.508744	9.28058e-11
HSPA5	2.37261e-06	7.18777e-12	0.201547	0.073365	0.133629	0.0777997	0.222564	0.555267	0.217172	0.717259	0.292163	0.588119	0.952508	0.598154	0.679817	9.36699e-11
CANT1	1.73716e-05	1.22765e-07	0.00217257	0.621927	0.251359	0.0093513	0.0674851	0.857416	0.242822	0.030505	0.038386	0.759256	0.991626	0.402523	0.102695	9.59423e-11
RTKN	0.000113528	1.75144e-13	0.26818	0.127161	0.806533	0.043876	0.0172411	0.629428	0.454456	0.587289	0.160374	0.903332	0.741112	0.667565	0.696883	9.60081e-11
PRPF6	0.0175082	1.7305e-10	0.00618949	0.571059	0.984123	0.00414857	0.00807266	0.550585	0.881606	0.0919964	0.0115154	0.52152	0.164936	0.311538	0.729435	9.75806e-11
MYO1E	3.50549e-10	8.33169e-07	0.402074	0.0510337	0.103393	0.233319	0.0336138	0.621738	0.113159	0.567889	0.514696	0.954755	0.871873	0.0868822	0.49587	9.8323e-11
HOXC4	2.67009e-07	1.9487e-06	0.214897	0.00307388	0.00135592	0.569048	0.269821	0.711863	0.228055	0.0782244	0.812761	0.504683	0.650115	0.310173	0.0478589	9.85951e-11
ATF1	3.76656e-10	0.000368762	0.00994557	0.00347362	0.0383272	0.0834381	0.305289	0.14538	0.735298	0.182257	0.311675	0.916203	0.745809	0.272255	0.68453	9.91159e-11
TBC1D4	0.00328995	1.7429e-13	0.905605	0.00418094	0.439294	0.584812	0.433317	0.00852488	0.981393	0.432448	0.229509	0.899532	0.782139	0.206667	0.124866	9.95432e-11
PDE10A	0.0110121	6.86916e-11	0.000110764	0.0308108	0.0947098	0.17329	0.349521	0.468831	0.879265	0.0357674	0.205561	0.762767	0.715731	0.332954	0.448835	9.99145e-11
TP63	0.000105927	5.64846e-12	0.0258822	0.0626919	0.174661	0.196521	0.17786	0.186875	0.418668	0.16171	0.481047	0.567502	0.749053	0.4556	0.532883	1.01155e-10
GFRA2	2.67825e-06	1.86459e-12	0.184553	0.0201456	0.343228	0.669214	0.185699	0.296439	0.448279	0.846572	0.247274	0.982339	0.930987	0.251016	0.756049	1.03193e-10
IL3RA	8.67713e-05	7.47674e-11	0.0928776	0.00304998	0.0908491	0.659344	0.466655	0.741472	0.497099	0.355259	0.149539	0.457981	0.500271	0.0590127	0.28802	1.05073e-10
GPR153	1.50869e-07	1.88732e-06	0.0107691	0.0169553	0.00590544	0.138264	0.4633	0.556606	0.4061	0.209341	0.351047	0.417656	0.620951	0.0872048	0.531633	1.0529e-10
ID3	0.000178016	2.11961e-08	0.00473466	0.00585925	0.133489	0.394198	0.17423	0.0536422	0.664996	0.172011	0.118649	0.98597	0.171045	0.0484658	0.715484	1.0843e-10
TSHZ1	4.67255e-05	3.8307e-10	0.127244	0.0511134	0.0866027	0.0317102	0.111942	0.888908	0.194423	0.64246	0.0478862	0.77795	0.484399	0.105399	0.549734	1.09789e-10
TRAF4	6.18935e-05	2.73633e-10	0.00943053	0.22219	0.148532	0.014934	0.0943739	0.967393	0.16971	0.296208	0.0719512	0.950546	0.740697	0.326781	0.724566	1.13291e-10
ZNF793	4.78245e-10	2.7787e-07	0.12603	0.0508182	0.179831	0.349104	0.160287	0.762311	0.262179	0.175842	0.54505	0.909329	0.831635	0.608394	0.059657	1.16583e-10
MNX1	0.000618867	4.42624e-11	0.0298957	0.183538	0.121863	0.0951347	0.00883099	0.221149	0.971477	0.125472	0.333551	0.896564	0.214176	0.329832	0.515931	1.16935e-10
SCTR	5.88968e-15	0.00375538	0.15648	0.0292364	0.68977	0.0508119	0.964984	0.264427	0.804027	0.503366	0.23253	0.413251	0.993065	0.332168	0.389509	1.1695e-10
MS4A2	1.03688e-06	1.25306e-10	0.0900379	0.0222537	0.937961	0.294411	0.173326	0.201598	0.618341	0.293673	0.347516	0.438389	0.586964	0.448835	0.24921	1.17732e-10
ZNF625	1.97582e-10	1.71136e-05	0.140597	0.0301773	0.0772204	0.902036	0.416425	0.708874	0.232542	0.090979	0.832836	0.223407	0.502404	0.232119	0.0337012	1.17755e-10
MAFB	0.0140551	2.99324e-11	0.00236991	0.0171115	0.075788	0.893197	0.394327	0.644319	0.772155	0.0458385	0.0941621	0.360318	0.41602	0.0668337	0.467787	1.18127e-10
ARHGAP32	6.52681e-07	5.59225e-09	0.247679	0.013742	0.0172015	0.677578	0.0959599	0.793644	0.474435	0.207083	0.260378	0.538458	0.865317	0.105218	0.333675	1.18733e-10
KL	1.13879e-09	4.6156e-09	0.0809695	0.0668791	0.301663	0.605616	0.134243	0.774054	0.314225	0.590706	0.570775	0.899671	0.937022	0.195292	0.491348	1.19042e-10
CCNC	5.40862e-08	1.19197e-06	0.0627468	0.00222161	0.00710117	0.947754	0.9798	0.193695	0.48729	0.160588	0.784987	0.414886	0.867342	0.0832925	0.219156	1.19059e-10
FOXJ2	0.00413606	5.28952e-13	0.0222747	0.0454993	0.139778	0.0923402	0.105323	0.98562	0.47473	0.60342	0.0956686	0.460069	0.901277	0.147545	0.953414	1.21302e-10
FOXF2	1.19526e-10	3.59028e-07	0.119908	0.00646898	0.306375	0.959115	0.421952	0.222976	0.788858	0.328079	0.960602	0.731101	0.365611	0.427814	0.18477	1.22919e-10
ANKZF1	0.0027885	1.60569e-12	0.0217943	0.00449327	0.264494	0.886512	0.0567063	0.307864	0.968784	0.66939	0.175253	0.802894	0.338812	0.107658	0.810255	1.23037e-10
TIGD3	0.00918818	7.2682e-14	0.0642845	0.0341782	0.306832	0.0460636	0.0320089	0.888462	0.974503	0.760782	0.215423	0.56485	0.264466	0.365594	0.952962	1.24207e-10
MAPK6	4.55474e-07	2.28181e-08	0.123389	0.0130516	0.018256	0.638039	0.193269	0.304851	0.214241	0.264458	0.276945	0.643271	0.821655	0.102111	0.506399	1.24654e-10
CXXC4	4.44084e-14	0.00195614	0.0161786	0.437101	0.134274	0.537434	0.260187	0.128933	0.48589	0.163193	0.537781	0.44172	0.698428	0.784761	0.323016	1.25285e-10
IL6R	1.75729e-07	3.67567e-11	0.060091	0.134656	0.461063	0.509312	0.232018	0.496782	0.410233	0.324227	0.375017	0.776466	0.974656	0.175493	0.53167	1.2572e-10
BAMBI	0.0249646	1.16067e-13	0.3488	0.108652	0.216509	0.0335643	0.243129	0.851483	0.0710105	0.207951	0.0475163	0.413184	0.644854	0.48874	0.338247	1.2803e-10
PTPRN	0.048897	4.08677e-09	0.000726304	0.00511499	0.00819622	0.557721	0.0983741	0.149906	0.743272	0.0588263	0.185094	0.967089	0.150093	0.209703	0.414899	1.28202e-10
NPFFR1	1.1356e-15	0.0752215	0.142597	0.0607285	0.0730956	0.221825	0.524428	0.757651	0.70594	0.195505	0.378399	0.386674	0.528307	0.933844	0.108352	1.28753e-10
GALR3	0.00813974	1.35534e-11	0.217237	0.123924	0.469048	0.00194221	0.0214155	0.226371	0.319764	0.602592	0.0086388	0.823523	0.473967	0.686646	0.920838	1.33273e-10
CDC42BPG	0.00183244	5.87758e-10	0.0186433	0.214888	0.0809099	0.102274	0.00404635	0.758137	0.198693	0.169321	0.0759638	0.876198	0.150145	0.191614	0.771144	1.34251e-10
PECAM1	0.000249248	5.13053e-12	0.134998	0.0178944	0.42463	0.292701	0.161054	0.752231	0.60176	0.596394	0.0848809	0.494905	0.312833	0.0670824	0.378343	1.36566e-10
ZNF326	0.0120054	0.00169085	2.03568e-06	0.040445	0.017597	0.0022582	0.36288	0.11659	0.34497	0.0766155	0.00473275	0.590451	0.269503	0.180142	0.574463	1.40565e-10
RNF6	2.27372e-05	1.77416e-08	0.051339	0.00321139	0.0265135	0.843656	0.0759037	0.191232	0.696793	0.142339	0.218624	0.777384	0.618638	0.0373346	0.692022	1.41105e-10
SLTM	0.00672085	1.81496e-05	1.05805e-05	0.0171774	0.00536583	0.0795767	0.860441	0.285586	0.716782	0.0430435	0.0259886	0.792819	0.139979	0.0631859	0.450166	1.42364e-10
RASGRP4	3.64305e-05	2.61999e-11	0.0623588	0.0207533	0.545193	0.800535	0.199003	0.568114	0.446387	0.46221	0.0782131	0.885289	0.443848	0.0170701	0.913582	1.44867e-10
TBX2	2.04448e-12	0.000259057	0.0667997	0.0142347	0.12994	0.179279	0.950303	0.435555	0.806366	0.204478	0.456183	0.577981	0.935048	0.121057	0.253742	1.45519e-10
FLT3LG	0.0230664	4.04292e-11	0.0705389	0.00155917	0.0290261	0.952385	0.0759022	0.0624138	0.778223	0.442309	0.142094	0.992647	0.630604	0.0219166	0.69439	1.48985e-10
RASEF	0.000396012	1.87384e-08	0.0101543	0.0808997	0.0300217	0.091898	0.0222235	0.511398	0.425155	0.0565991	0.103957	0.306797	0.394912	0.139774	0.779311	1.49904e-10
CHN1	3.01658e-05	2.42594e-10	0.00867867	0.0419261	0.0708209	0.551545	0.159231	0.77088	0.692994	0.153803	0.488684	0.731484	0.102555	0.171119	0.769162	1.54398e-10
DGKB	1.05717e-05	2.79154e-08	0.0256986	0.0408492	0.019955	0.392704	0.0692228	0.706878	0.0589338	0.124734	0.271628	0.977834	0.554088	0.159659	0.32073	1.54663e-10
SREBF2	0.00403865	8.42215e-11	0.00472054	0.337611	0.407042	0.084236	0.0701628	0.141678	0.514175	0.0940451	0.117706	0.518589	0.12212	0.312841	0.327771	1.58979e-10
RASD2	7.1184e-07	1.11448e-08	0.0439883	0.00793085	0.0360143	0.230085	0.226734	0.667421	0.44322	0.477045	0.359663	0.663281	0.710367	0.102543	0.544984	1.61054e-10
SP6	5.21451e-06	3.55447e-12	0.305002	0.0686571	0.512892	0.997537	0.0187576	0.477763	0.509556	0.265442	0.403588	0.548951	0.926922	0.372614	0.380487	1.62067e-10
PDGFRB	0.0537032	3.85235e-07	1.09057e-05	0.0230028	0.00330698	0.777837	0.749163	0.739976	0.728606	0.00797567	0.316413	0.655934	0.108573	0.105608	0.0692491	1.63428e-10
KLF12	2.59259e-05	2.55399e-10	0.00491199	0.238733	0.2864	0.0375569	0.0627001	0.751521	0.535621	0.178834	0.149078	0.855054	0.69192	0.517163	0.412247	1.63448e-10
PRKN	1.75842e-05	4.71452e-11	0.131856	0.0162675	0.222725	0.110065	0.162373	0.663526	0.368891	0.596163	0.174794	0.942724	0.693886	0.11366	0.533161	1.64613e-10
SPOCK3	5.37528e-06	3.6718e-09	0.0280341	0.0317082	0.281962	0.110188	0.0792774	0.381634	0.44681	0.158251	0.237868	0.880346	0.37845	0.448367	0.174769	1.66063e-10
COPS5	5.50431e-09	2.60085e-08	0.112224	0.00552647	0.0643525	0.613138	0.788867	0.472445	0.7483	0.255114	0.868458	0.673904	0.55201	0.465918	0.194532	1.67036e-10
NLGN1	8.54125e-06	2.10653e-09	0.0326347	0.036007	0.158441	0.0478618	0.0534485	0.576658	0.418432	0.478654	0.066294	0.965061	0.704571	0.245221	0.668063	1.6721e-10
PLCXD3	4.23231e-06	1.05802e-10	0.0338108	0.0575239	0.203597	0.476059	0.0614607	0.153505	0.50873	0.529491	0.651341	0.937837	0.197276	0.544772	0.526412	1.68988e-10
IGSF1	3.58571e-06	2.01905e-07	0.0073198	0.0982576	0.0196923	0.104148	0.0354533	0.319772	0.875125	0.170173	0.15249	0.681829	0.655628	0.220618	0.274062	1.69288e-10
MTNR1A	0.00386754	1.03913e-09	0.00401244	0.178363	0.0144597	0.0181557	0.425389	0.87137	0.0353686	0.114137	0.0641332	0.7249	0.611628	0.523916	0.447329	1.70949e-10
SMAD9	2.73793e-08	3.02287e-08	0.0372668	0.0735414	0.0589259	0.21391	0.126979	0.746772	0.513953	0.304143	0.446269	0.87422	0.746609	0.150866	0.417238	1.74998e-10
RAB17	0.0145589	5.77177e-08	0.000429917	0.663602	0.0270702	0.0107522	0.00428296	0.888143	0.35756	0.0417828	0.0321237	0.436943	0.368943	0.519188	0.739583	1.76916e-10
EML4	0.00664013	1.32468e-10	0.352709	0.00130475	0.0258131	0.535863	0.00882854	0.185256	0.626747	0.389983	0.276715	0.594495	0.768401	0.0500654	0.570107	1.80085e-10
VAX2	6.28235e-06	2.75023e-07	0.00757575	0.00491435	0.00575042	0.749496	0.12601	0.342536	0.661565	0.197366	0.214498	0.766059	0.287733	0.185251	0.593563	1.80863e-10
HDAC7	5.19428e-07	3.3409e-06	0.0916034	0.00214185	0.00360265	0.236162	0.47021	0.142992	0.49859	0.125995	0.583637	0.459605	0.930551	0.217133	0.122847	1.81257e-10
TBC1D25	0.0076474	7.28424e-10	0.0241899	0.00222714	0.00755124	0.665258	0.426818	0.116484	0.748284	0.251499	0.208126	0.468743	0.582947	0.0135356	0.767041	1.84261e-10
GPR27	4.83486e-10	1.46065e-05	0.0952588	0.102701	0.0236058	0.1573	0.395913	0.0598006	0.432203	0.257976	0.357658	0.535496	0.876677	0.32714	0.228796	1.87243e-10
MITF	0.000523751	2.91943e-13	0.143403	0.0469922	0.508979	0.0857343	0.0223554	0.594004	0.68838	0.787276	0.0638658	0.869121	0.95313	0.553148	0.9041	1.88069e-10
HOXC11	7.72451e-05	1.85419e-12	0.736892	0.00620009	0.54157	0.550365	0.029583	0.386714	0.562338	0.769395	0.238646	0.569181	0.643928	0.247824	0.409372	1.88155e-10
CNOT6	5.58053e-09	4.19401e-05	0.00138214	0.0150019	0.0976246	0.216248	0.538171	0.121883	0.853313	0.118052	0.4694	0.958686	0.601719	0.0513657	0.934473	1.91924e-10
ZFP92	0.000572815	3.5583e-10	0.00181946	0.0472674	0.0206713	0.347091	0.347689	0.901096	0.921333	0.0931426	0.17967	0.274196	0.478178	0.238596	0.463169	1.91995e-10
NSMCE3	3.20405e-05	1.00937e-08	0.0737601	0.00743888	0.0384849	0.719448	0.0231113	0.305429	0.554092	0.260889	0.170474	0.804331	0.460029	0.0414675	0.704016	1.98905e-10
ZNF692	0.0281845	3.76661e-11	0.00191102	0.00343518	0.301525	0.355278	0.199018	0.149335	0.804448	0.503269	0.0491412	0.506581	0.461875	0.10107	0.887508	1.99424e-10
FZD4	0.000122919	3.17721e-11	0.00820219	0.0321457	0.166982	0.432027	0.219737	0.799677	0.629204	0.375124	0.150046	0.779061	0.457443	0.12005	0.491044	2.06523e-10
ZNF671	6.68842e-10	5.02336e-09	0.271491	0.0490249	0.148716	0.459949	0.181392	0.832765	0.512891	0.54979	0.475693	0.763325	0.775831	0.415384	0.643273	2.08034e-10
ASB5	0.00793568	1.69844e-08	0.00934227	0.0607867	0.0347579	0.0224448	0.0661702	0.762529	0.0877558	0.188763	0.013436	0.878352	0.374766	0.116439	0.391668	2.12099e-10
MRTFA	9.99892e-06	4.53702e-08	0.111157	0.00151728	0.00354343	0.347459	0.868505	0.0360511	0.851498	0.349971	0.634628	0.60818	0.906733	0.108884	0.30404	2.13917e-10
ACTN2	5.66574e-06	8.65353e-09	0.0275844	0.0305754	0.0196386	0.162107	0.067778	0.657651	0.344651	0.305159	0.120429	0.968321	0.656404	0.274322	0.789175	2.14597e-10
ZNF473	0.000104056	8.20357e-13	0.556938	0.0394863	0.62578	0.480851	0.173952	0.11936	0.309305	0.656243	0.333508	0.990113	0.713628	0.0495424	0.371664	2.16193e-10
HIPK2	6.17436e-09	0.0171529	0.12396	0.228104	0.71497	0.00102396	0.0177779	0.904724	0.397867	0.0656768	0.00747562	0.247725	0.0891814	0.674903	0.10215	2.18699e-10
GDF7	2.65929e-10	3.03331e-09	0.222679	0.0403328	0.401251	0.739504	0.246866	0.571684	0.816434	0.652917	0.820618	0.75276	0.94167	0.245086	0.459715	2.20365e-10
AFP	0.0254582	1.25932e-05	0.367598	0.584493	0.0105931	0.000539462	0.504861	0.054404	0.00868177	0.415188	0.0049769	0.00386512	0.313935	0.828791	0.0556075	2.24168e-10
IFI16	0.0065306	3.61147e-12	0.00336169	0.132504	0.538823	0.0576419	0.105159	0.508932	0.406052	0.197315	0.113089	0.663928	0.423908	0.431852	0.565361	2.24565e-10
ZMAT1	2.51279e-06	2.95557e-10	0.0447432	0.38395	0.537585	0.0140025	0.0918299	0.901258	0.313459	0.334168	0.0940846	0.896619	0.819397	0.581385	0.34362	2.34063e-10
CCND1	2.30436e-07	1.61719e-10	0.345143	0.145119	0.160417	0.489792	0.0470731	0.90388	0.11795	0.574118	0.430684	0.886521	0.575934	0.148964	0.846178	2.37302e-10
SMAD7	1.26969e-05	3.47837e-08	0.00592313	0.0018298	0.0309357	0.527264	0.943429	0.157355	0.870207	0.211104	0.354046	0.941601	0.49598	0.0693745	0.48344	2.38729e-10
RAB10	1.08115e-08	6.17224e-07	0.0994636	0.011965	0.0154455	0.994384	0.332749	0.399891	0.317667	0.160401	0.510525	0.454256	0.84821	0.144166	0.507329	2.40083e-10
CNTLN	3.16138e-05	7.56012e-11	0.0139562	0.0926342	0.20751	0.0789623	0.0420165	0.757039	0.510062	0.372151	0.17601	0.9564	0.449357	0.727045	0.710027	2.40664e-10
DNAJA1	7.62277e-08	2.48083e-10	0.501068	0.00618492	0.335637	0.414677	0.63625	0.189286	0.655997	0.436462	0.721393	0.818736	0.573851	0.708532	0.177467	2.41413e-10
FLNA	0.0037933	1.20984e-10	0.0136735	0.0199219	0.0126407	0.115042	0.158889	0.786014	0.390036	0.3824	0.0666055	0.706874	0.848788	0.145131	0.614551	2.42649e-10
HR	0.000299638	4.65729e-08	0.000570454	0.342885	0.0421686	0.245265	0.0792	0.893462	0.378427	0.0206322	0.124236	0.953781	0.189125	0.114838	0.301493	2.43129e-10
ITGA11	0.380539	5.91019e-05	1.50203e-07	0.0549658	0.00114898	0.841297	0.730456	0.92027	0.593254	0.000760382	0.343666	0.76426	0.136716	0.333279	0.018621	2.43529e-10
ZNF138	0.000915694	9.00184e-11	0.00856507	0.00101955	0.0275424	0.880994	0.378774	0.49801	0.962655	0.41367	0.316391	0.806734	0.672816	0.0997092	0.548855	2.46523e-10
STX2	0.00286101	1.02993e-08	0.00123037	0.400581	0.0598586	0.0125359	0.013102	0.999097	0.191402	0.089072	0.0502657	0.644073	0.399912	0.472121	0.842226	2.4933e-10
FGD6	0.073213	0.000409636	2.67931e-09	0.953129	0.195418	0.00830686	0.423202	0.947387	0.879647	0.000505908	0.0474391	0.920732	0.336917	0.50259	0.0768163	2.50549e-10
NFXL1	3.24696e-07	1.53034e-08	0.0462466	0.00433086	0.154674	0.982417	0.338454	0.0471768	0.803168	0.201322	0.729369	0.886607	0.679774	0.14646	0.505616	2.52119e-10
SHANK2	9.09137e-09	0.000316028	0.857774	0.802668	0.907064	0.0142779	0.0051033	0.401993	0.629898	0.202205	0.0170166	0.208143	0.141968	0.133323	0.0289426	2.56206e-10
PTEN	0.00428635	5.53938e-09	0.00459416	0.254674	0.238846	0.00128069	0.177009	0.873519	0.10022	0.171406	0.00930571	0.416174	0.397301	0.638688	0.585924	2.56318e-10
TXNIP	2.94168e-05	4.1825e-12	0.270204	0.0443755	0.486255	0.190756	0.063547	0.417519	0.333366	0.635549	0.229643	0.957675	0.603743	0.210361	0.605904	2.56634e-10
SORCS1	6.36594e-06	1.76702e-09	0.0350272	0.10776	0.149778	0.0481863	0.0690732	0.60992	0.347271	0.468809	0.0388524	0.991711	0.976548	0.253977	0.650729	2.57393e-10
ZDHHC20	3.10091e-06	9.76837e-07	0.00181174	0.0400904	0.00557745	0.811042	0.268659	0.427679	0.624388	0.0425424	0.292911	0.670493	0.314515	0.0714598	0.983298	2.5905e-10
TRPS1	0.003619	4.24522e-11	0.00284296	0.112752	0.0342005	0.0494128	0.0602867	0.564523	0.953106	0.306137	0.214954	0.851977	0.518769	0.328778	0.513131	2.5996e-10
AIFM1	8.10384e-06	1.48649e-09	0.0134628	0.0335945	0.112636	0.135157	0.238652	0.250346	0.852434	0.134521	0.292941	0.739005	0.908562	0.677177	0.175735	2.60748e-10
HABP4	6.7365e-06	1.61795e-07	0.0492016	0.0143567	0.00174599	0.710047	0.216815	0.619488	0.252765	0.145197	0.268173	0.467508	0.556508	0.043948	0.924589	2.61305e-10
MYCN	9.23926e-06	1.36147e-06	0.279569	0.789521	0.435785	7.97393e-05	0.0503236	0.400454	0.91635	0.480956	0.00083911	0.128581	0.306443	0.939757	0.502364	2.61837e-10
CDON	7.94846e-05	4.33195e-10	0.0712494	0.136181	0.21764	0.0132327	0.173955	0.922344	0.373042	0.137413	0.0455735	0.845765	0.366573	0.295387	0.408446	2.63495e-10
GCLC	0.0497449	2.51048e-08	0.00473708	0.183703	0.127936	0.28331	0.0818119	0.547467	0.754646	0.00902042	0.00795368	0.58044	0.0638312	0.025901	0.149333	2.66361e-10
ITGA7	3.8472e-05	2.84776e-08	0.0568737	0.0254776	0.0347311	0.0324217	0.263514	0.917649	0.130932	0.521525	0.0436094	0.781343	0.48745	0.0503434	0.5562	2.66925e-10
DERL1	1.86295e-05	2.0029e-10	0.473875	0.0200755	0.189738	0.0258833	0.0704808	0.65994	0.220461	0.814455	0.0885602	0.421632	0.789393	0.471406	0.691565	2.70698e-10
MYC	4.71787e-09	3.76304e-09	0.19375	0.0272631	0.493965	0.971879	0.689774	0.273638	0.668462	0.200067	0.839805	0.687293	0.478299	0.349356	0.128099	2.71413e-10
PREX2	7.18424e-07	2.07989e-10	0.0112304	0.0356969	0.275933	0.499896	0.321883	0.908683	0.472152	0.351134	0.507053	0.702422	0.848209	0.281775	0.447169	2.8856e-10
ZNF676	1.4356e-05	5.32869e-09	0.0640913	0.0562541	0.38628	0.0154371	0.00857639	0.562324	0.467661	0.575815	0.0363598	0.935963	0.397581	0.684729	0.772849	2.89139e-10
TACSTD2	0.0438179	1.12429e-06	0.349581	0.83493	0.00218338	0.0056167	0.12483	0.369695	0.00044238	0.464525	8.4548e-05	0.779035	0.97429	0.190508	0.749606	2.89583e-10
ZSWIM1	0.00198462	1.1865e-12	0.213025	0.113949	0.801687	0.275606	0.0131853	0.557218	0.502665	0.466399	0.0550664	0.256904	0.388586	0.510614	0.2518	2.90286e-10
TRIM27	0.00162815	1.79595e-11	0.0450087	0.0245818	0.315602	0.0206204	0.152323	0.319124	0.27403	0.366731	0.123514	0.95484	0.868488	0.192198	0.761504	2.90888e-10
GPR143	1.68121e-11	0.131257	0.0846389	0.591924	0.104093	0.00991892	0.99457	0.208929	0.234464	0.046604	0.0408206	0.0837862	0.607095	0.845825	0.0339978	2.91681e-10
NCOA5	0.00165745	6.14786e-13	0.155955	0.0929888	0.805608	0.0454219	0.0236974	0.433147	0.83338	0.260869	0.157297	0.506528	0.544166	0.875893	0.341308	2.93976e-10
ZNF600	0.00135903	6.11611e-08	0.002205	0.00170281	0.0185864	0.174851	0.593471	0.0990632	0.787637	0.179154	0.0580929	0.977869	0.601934	0.0597747	0.910708	2.94286e-10
SORCS3	3.77393e-06	2.68061e-09	0.0902754	0.00669754	0.100483	0.437167	0.039593	0.556448	0.21086	0.365447	0.183361	0.832813	0.945981	0.346202	0.689403	2.95189e-10
ROBO2	4.24817e-12	3.65117e-05	0.0530669	0.0445661	0.230226	0.712987	0.601787	0.336756	0.535173	0.256637	0.89482	0.157896	0.850774	0.704475	0.110986	2.95527e-10
NKIRAS1	0.014833	8.17019e-13	0.194822	0.0430854	0.2552	0.0341965	0.00784138	0.571934	0.815437	0.881842	0.0609376	0.621004	0.753135	0.196601	0.990216	2.97372e-10
AURKA	0.000460745	2.05738e-13	0.355925	0.00714234	0.34818	0.157992	0.130267	0.243483	0.730879	0.866161	0.325764	0.86617	0.964215	0.268353	0.820677	2.98253e-10
CNKSR1	1.75126e-05	3.42846e-11	0.0312844	0.159478	0.157272	0.306268	0.0344832	0.982072	0.191637	0.253797	0.288631	0.955639	0.667394	0.633215	0.579964	2.99885e-10
RCOR1	1.35565e-11	3.15639e-05	0.0594628	0.0690732	0.0875101	0.837146	0.537749	0.404313	0.235548	0.167463	0.564388	0.62347	0.903772	0.111107	0.432422	3.10925e-10
NR2F2	1.68677e-05	5.83635e-12	0.498737	0.00933916	0.165925	0.24805	0.0915877	0.470372	0.456511	0.74365	0.238917	0.781871	0.959108	0.494796	0.707141	3.16782e-10
MYCBP	3.72537e-08	8.16907e-08	0.079996	0.0164613	0.00709008	0.717541	0.626181	0.701651	0.40433	0.255922	0.726507	0.439816	0.684219	0.213759	0.405184	3.2015e-10
NDC80	7.17607e-06	4.88744e-11	0.433675	0.000519583	0.268295	0.633283	0.16369	0.132968	0.911517	0.965952	0.493897	0.895182	0.84864	0.209259	0.868973	3.2022e-10
ANKDD1A	7.00791e-08	9.72692e-09	0.0320752	0.236067	0.249671	0.0391674	0.122713	0.862343	0.340114	0.343034	0.146962	0.878174	0.940031	0.494377	0.471881	3.21291e-10
CD2AP	5.27532e-07	8.0829e-08	0.095067	0.0413143	0.0074049	0.924369	0.137023	0.756983	0.17509	0.221851	0.414777	0.343232	0.64468	0.047234	0.896166	3.25415e-10
CMKLR1	0.032551	1.17186e-11	0.00188928	0.0200272	0.193209	0.501824	0.474212	0.858587	0.449995	0.0540604	0.074764	0.392325	0.596057	0.110276	0.676488	3.27216e-10
ZFHX3	1.85832e-07	1.74046e-06	0.0214795	0.0615322	0.00791682	0.062164	0.260505	0.949309	0.0842953	0.259463	0.195234	0.655445	0.865134	0.366337	0.393892	3.28551e-10
ITGB1BP2	0.000350917	3.30797e-08	0.153419	0.0701455	0.0622556	0.0089961	0.0790779	0.958284	0.104866	0.287261	0.02406	0.82247	0.289941	0.0708351	0.280799	3.29207e-10
NFIA	1.81e-05	1.15766e-10	0.297026	0.0805395	0.398426	0.00524329	0.237764	0.625869	0.317632	0.862576	0.0284681	0.667213	0.741537	0.4726	0.642812	3.29763e-10
ZNF549	1.08732e-06	1.36785e-07	0.0497583	0.175077	0.0207016	0.0609416	0.148135	0.687633	0.291019	0.270932	0.0724724	0.559067	0.354366	0.15989	0.63106	3.39721e-10
IGFBP6	9.0395e-07	2.8203e-07	0.0271214	0.00849024	0.0757864	0.96752	0.264017	0.0446809	0.808968	0.125104	0.426772	0.928106	0.373699	0.0373606	0.670717	3.40279e-10
HCRTR1	2.79784e-05	9.01433e-08	0.053278	0.000931607	0.0531551	0.528234	0.377571	0.0682316	0.926727	0.131238	0.34555	0.745375	0.585415	0.0567547	0.205082	3.4379e-10
SNCAIP	9.19396e-12	3.71376e-05	0.0681736	0.064096	0.266601	0.335207	0.145685	0.598388	0.914741	0.335773	0.529074	0.570095	0.349428	0.0974414	0.530028	3.45174e-10
PPARG	5.0105e-07	1.57443e-09	0.131934	0.163942	0.011487	0.476829	0.135282	0.949399	0.377415	0.237451	0.530252	0.394675	0.617724	0.237658	0.594854	3.48144e-10
TCF15	7.7508e-06	3.7529e-07	0.0237555	0.00247131	0.0062373	0.712848	0.146378	0.676979	0.347908	0.230866	0.365826	0.60875	0.433753	0.0533231	0.631723	3.48199e-10
ZNF121	1.98496e-06	0.014499	3.69688e-06	0.0359831	0.193795	0.0120498	0.556454	0.157285	0.613254	0.0345935	0.0500663	0.929907	0.276575	0.113044	0.82329	3.51187e-10
DEPDC1	6.99313e-09	3.99532e-08	0.181878	0.0023271	0.167585	0.774365	0.808076	0.0793162	0.487641	0.555385	0.746882	0.888785	0.854437	0.227067	0.581031	3.5172e-10
NFIX	0.000279033	3.40563e-11	0.396066	0.00050066	0.0808756	0.276725	0.422826	0.240996	0.496086	0.612245	0.3801	0.795793	0.493141	0.308258	0.349861	3.65485e-10
ARHGEF17	0.000178783	8.62659e-10	0.0040077	0.0110329	0.014297	0.283479	0.371659	0.908248	0.616118	0.305608	0.259947	0.735568	0.968309	0.126183	0.540764	3.80745e-10
PPP1R12A	0.016034	1.28455e-06	1.21389e-05	0.870951	0.467877	0.000182276	0.110897	0.976362	0.149307	0.156835	0.0020327	0.956384	0.784638	0.924124	0.335808	3.81946e-10
CREB3L2	3.92392e-06	8.3569e-11	0.00874846	0.0426407	0.119403	0.437694	0.50161	0.762914	0.72628	0.32696	0.415896	0.897349	0.90251	0.167277	0.682747	3.82706e-10
PRMT6	0.284195	2.06026e-15	0.0990369	0.028015	0.256122	0.209842	0.909626	0.200991	0.244706	0.655055	0.180044	0.529909	0.439164	0.267423	0.783861	3.8429e-10
GDI2	5.59453e-10	0.000109828	0.00366398	0.178932	0.0158907	0.459041	0.920948	0.477703	0.910038	0.0675597	0.752886	0.527013	0.514017	0.200694	0.0693872	3.85546e-10
TCERG1	6.64971e-05	8.00278e-08	0.00375991	0.00168657	0.0798296	0.296996	0.360988	0.060787	0.868432	0.143689	0.228289	0.99684	0.520647	0.116043	0.749753	3.85675e-10
ACVR1B	0.0114332	2.88124e-12	0.178185	0.419613	0.19318	0.0260891	0.0039372	0.791216	0.438625	0.684113	0.0708076	0.332716	0.254106	0.341825	0.964021	3.89534e-10
ZNF569	2.97672e-07	1.22803e-07	0.0260658	0.227184	0.0151442	0.979975	0.0299937	0.84711	0.161573	0.0852145	0.324785	0.989708	0.538673	0.566118	0.20872	3.90831e-10
ZNF503	2.94758e-09	0.00126634	0.178803	0.00136887	0.0172688	0.196083	0.790099	0.173804	0.986488	0.0205173	0.509548	0.232557	0.835325	0.322323	0.0842645	3.92367e-10
CRTC1	1.0378e-08	3.51582e-08	0.205035	0.0124833	0.0182711	0.824328	0.651198	0.446813	0.403232	0.405216	0.704066	0.607869	0.925353	0.16034	0.548958	3.94804e-10
GJA1	9.9252e-05	1.28336e-08	0.00283189	0.0644911	0.0750427	0.0298999	0.04168	0.850887	0.73911	0.187937	0.127971	0.897786	0.31291	0.354203	0.741899	4.07e-10
TFAM	1.46494e-06	1.27763e-09	0.0876101	0.00775569	0.0854244	0.443455	0.210803	0.207047	0.803148	0.451428	0.493684	0.792136	0.890402	0.13345	0.689013	4.0844e-10
HIF3A	1.16343e-05	2.95603e-07	0.0125419	0.0313601	0.0329127	0.134354	0.129444	0.883688	0.247718	0.147138	0.126737	0.903998	0.392547	0.0825733	0.269952	4.15725e-10
PYGO1	2.45599e-08	7.75544e-08	0.0191865	0.0395058	0.0551409	0.487036	0.0750152	0.722756	0.608884	0.456006	0.406393	0.839945	0.73131	0.358664	0.480261	4.16913e-10
FARP2	0.0176261	1.00607e-07	0.0121069	0.0254927	0.0547035	0.227617	0.00240881	0.337391	0.789024	0.00925697	0.146843	0.82769	0.0901541	0.0846868	0.67344	4.1914e-10
LOC653160	2.44899e-08	2.03624e-08	0.0652401	0.0627278	0.716695	0.0879563	0.299737	0.265516	0.639994	0.23483	0.25159	0.697512	0.743578	0.726157	0.1767	4.25032e-10
ZFP28	1.91814e-09	1.34698e-07	0.0649036	0.0522838	0.10827	0.319803	0.136708	0.640692	0.850145	0.480533	0.366528	0.742264	0.880418	0.174326	0.576395	4.29655e-10
LCORL	6.69277e-07	7.75463e-08	0.0540622	0.00360417	0.0105831	0.754372	0.129657	0.32007	0.948484	0.385845	0.535999	0.704237	0.687313	0.0858879	0.958293	4.30133e-10
FOXD2	0.0143412	1.23371e-11	0.281737	0.0647954	0.305381	0.082141	0.000358762	0.340373	0.720227	0.468638	0.302138	0.801571	0.108007	0.446173	0.672602	4.30501e-10
KDM1A	1.87614e-08	2.29895e-09	0.304204	0.0129131	0.338531	0.969911	0.571889	0.032542	0.839642	0.474084	0.878202	0.970843	0.716635	0.39118	0.266191	4.30589e-10
ING4	6.84965e-05	3.11032e-11	0.438637	0.0571798	0.178023	0.612916	0.0410449	0.112164	0.405945	0.348166	0.0891285	0.869118	0.430059	0.533307	0.390332	4.31656e-10
ADNP2	6.28301e-10	0.00012048	0.0122827	0.0189639	0.159778	0.342435	0.739238	0.0162999	0.844114	0.139016	0.466535	0.81642	0.951245	0.164321	0.32665	4.34304e-10
FRAT2	6.39072e-05	9.2501e-10	0.00724998	0.313097	0.105725	0.0874276	0.0979172	0.395387	0.657111	0.0793258	0.328608	0.99142	0.305381	0.216771	0.495023	4.36652e-10
FOXS1	0.0097346	7.47539e-07	0.00102336	0.00949106	0.00231039	0.336528	0.953312	0.187252	0.95062	0.0227635	0.120221	0.540371	0.664625	0.0560104	0.0538311	4.47593e-10
DNMBP	0.000873224	1.35727e-07	0.0123038	0.0479214	0.0061382	0.485655	0.00931408	0.648693	0.839892	0.0890237	0.403491	0.595847	0.0498617	0.0440318	0.577836	4.60296e-10
CLDN4	1.88281e-05	4.61728e-12	0.648053	0.0248988	0.406901	0.63976	0.0516476	0.682983	0.30704	0.494572	0.401526	0.852178	0.443327	0.419396	0.231504	4.6153e-10
CARTPT	0.00573295	3.83289e-07	0.214231	0.0134989	0.0725054	0.0132416	0.036144	0.754794	0.113902	0.443453	0.00637729	0.549912	0.174346	0.0146032	0.38685	4.64239e-10
GMPS	3.426e-08	1.09581e-08	0.365519	0.00782576	0.403245	0.332106	0.438803	0.0905583	0.328358	0.64917	0.556146	0.67942	0.809774	0.127788	0.619513	4.69758e-10
BNIP3	8.59938e-08	1.53065e-07	0.201769	0.00292404	0.152456	0.543913	0.10093	0.153445	0.663564	0.721284	0.835902	0.815602	0.268545	0.0575445	0.588722	4.7091e-10
MCM4	2.99917e-07	8.65316e-11	0.115098	0.0299903	0.404417	0.402719	0.157917	0.280411	0.577381	0.732147	0.550985	0.923301	0.789121	0.289745	0.932274	4.71025e-10
IRF5	4.34952e-06	1.20152e-08	0.00676141	0.0441547	0.0558941	0.848171	0.374554	0.350195	0.826636	0.129514	0.336939	0.410697	0.521313	0.135501	0.292165	4.71592e-10
GPR155	9.86718e-06	2.50859e-11	0.0755537	0.0918637	0.378093	0.168162	0.0407423	0.42485	0.438666	0.505351	0.293464	0.984816	0.926081	0.442557	0.598629	4.72239e-10
RGS6	5.66322e-07	2.41058e-10	0.361754	0.0094914	0.494985	0.251774	0.14889	0.586099	0.496001	0.730468	0.3858	0.723352	0.932664	0.147526	0.421965	4.74641e-10
SPAG5	0.00146177	8.7654e-13	0.258878	0.00471257	0.392058	0.488219	0.0826936	0.140723	0.423235	0.970775	0.377594	0.840898	0.620534	0.114658	0.928501	4.75603e-10
RASSF9	5.41916e-10	6.36371e-06	0.0798603	0.0278838	0.0855345	0.795509	0.0865779	0.152126	0.62029	0.253052	0.872551	0.410018	0.561951	0.563756	0.252568	4.86256e-10
NCOR1	0.000204155	0.239611	1.46813e-06	0.152315	0.00137228	0.0067638	0.811948	0.508845	0.599016	0.0055125	0.0324215	0.998869	0.273018	0.0572399	0.446228	4.90407e-10
SCRT2	0.000460209	0.000819407	3.67904e-05	0.240373	0.00584446	0.201767	0.762845	0.444811	0.540019	0.00146249	0.415142	0.56028	0.056165	0.0345779	0.0671212	4.98126e-10
PIGU	1.96832e-06	1.9348e-10	0.138378	0.0445541	0.231163	0.0791724	0.0641415	0.940854	0.315484	0.77958	0.188556	0.813432	0.91899	0.446074	0.800645	4.99894e-10
NPHP1	1.35335e-14	0.000327823	0.204125	0.157164	0.251121	0.620978	0.323705	0.399998	0.401399	0.39531	0.794335	0.808483	0.781785	0.925287	0.154571	5.0719e-10
HLX	0.000120305	3.83008e-07	0.00408458	0.0013662	0.0237862	0.748386	0.921128	0.262264	0.935185	0.0379811	0.288789	0.785024	0.264589	0.0614374	0.229456	5.12509e-10
CYLD	0.0181165	1.13156e-12	0.0347876	0.0715985	0.291451	0.0842203	0.0489507	0.646303	0.260138	0.299347	0.133846	0.467814	0.804989	0.262685	0.812485	5.12558e-10
ROBO1	7.44968e-07	6.71497e-09	0.00332702	0.0581106	0.0677378	0.277225	0.33277	0.780025	0.860941	0.153885	0.626872	0.762802	0.669712	0.404457	0.412762	5.14538e-10
SIRT7	1.89703e-05	8.31226e-09	0.0119902	0.251542	0.021669	0.123359	0.0978969	0.95551	0.191294	0.125858	0.195437	0.840178	0.529522	0.201178	0.66748	5.14955e-10
DDAH2	8.37776e-10	0.00659585	0.0206903	0.013464	0.00909788	0.200955	0.798912	0.0345115	0.977745	0.0265134	0.598505	0.628426	0.99795	0.186063	0.24026	5.18632e-10
KMT5C	0.00476012	7.16982e-13	0.0566993	0.214597	0.663624	0.0748984	0.0212976	0.479121	0.527555	0.305567	0.212422	0.792814	0.240932	0.282136	0.881522	5.24396e-10
OR2A7	4.43085e-05	2.85256e-06	0.0508266	0.0315744	0.0041706	0.847503	0.0128008	0.660881	0.569868	0.028066	0.373381	0.956387	0.0545178	0.0300446	0.604442	5.24774e-10
LASP1	0.00535995	1.47945e-10	0.025089	0.368802	0.265892	0.00262427	0.00854631	0.841517	0.375906	0.716891	0.0163854	0.563632	0.659897	0.59388	0.965144	5.28875e-10
SATB1	0.000735967	2.64453e-12	0.123895	0.0996495	0.29432	0.0340441	0.0904893	0.84909	0.309173	0.785812	0.103153	0.799229	0.889622	0.128553	0.83611	5.3748e-10
ZNF438	0.00933239	8.23448e-12	0.00851018	0.132459	0.453379	0.0161445	0.0658134	0.679223	0.303995	0.471543	0.0596324	0.80441	0.986626	0.298693	0.621517	5.40468e-10
RFX2	8.56612e-05	1.61235e-10	0.0303047	0.0104901	0.0365344	0.128946	0.226274	0.756553	0.820706	0.286406	0.336864	0.523392	0.948141	0.370669	0.701091	5.45584e-10
NRAS	4.50137e-08	1.10823e-07	0.169511	0.0207215	0.0176128	0.335166	0.247239	0.331351	0.441531	0.425751	0.679258	0.53695	0.961608	0.166236	0.398901	5.55431e-10
HSPD1	1.08738e-08	3.29321e-09	0.266618	0.0237766	0.276793	0.273517	0.447614	0.237258	0.565854	0.704044	0.494054	0.907473	0.734387	0.222084	0.697385	5.55782e-10
ZNF367	2.47962e-06	1.01854e-10	0.0481107	0.0112121	0.237484	0.943493	0.340896	0.200957	0.725751	0.794523	0.553295	0.976961	0.593407	0.0979065	0.985112	5.58268e-10
DDR1	0.000307733	1.395e-10	0.145019	0.558454	0.0940032	0.245748	0.0113846	0.846924	0.0544441	0.156947	0.19017	0.868014	0.384409	0.22106	0.40986	5.66363e-10
ZNF35	1.97317e-10	1.59492e-06	0.0184274	0.164303	0.278436	0.330115	0.356127	0.498168	0.284612	0.329957	0.702541	0.682841	0.932203	0.332809	0.178167	5.73458e-10
PNOC	6.40331e-06	1.39994e-09	0.125264	0.1587	0.499097	0.963907	0.228804	0.357298	0.317318	0.0806594	0.443046	0.581515	0.652081	0.0768838	0.0169264	5.79192e-10
HOXA5	2.40754e-06	2.50516e-08	0.0360131	0.0588082	0.285236	0.0132733	0.0435807	0.546231	0.677307	0.497318	0.0944804	0.625489	0.912104	0.475304	0.395692	5.80198e-10
RHOBTB2	2.138e-08	5.81663e-09	0.0927545	0.00582764	0.0366917	0.972197	0.518666	0.452506	0.751119	0.464641	0.775977	0.870377	0.895485	0.507971	0.658745	5.84954e-10
SHC3	0.0130538	2.23238e-10	0.00221786	0.067232	0.0124335	0.136538	0.166464	0.925973	0.979253	0.171742	0.153504	0.839331	0.0925095	0.261325	0.671726	5.8776e-10
ZNF134	1.65694e-12	1.11713e-05	0.217326	0.255338	0.190393	0.788396	0.161549	0.454576	0.483334	0.284086	0.899001	0.54483	0.90553	0.19732	0.304906	6.03626e-10
PIM1	0.0125286	5.41131e-11	0.0041556	0.00724227	0.0240745	0.957357	0.320509	0.23207	0.750471	0.151056	0.73197	0.845164	0.724591	0.0869825	0.270212	6.06738e-10
ZBTB22	2.04263e-10	7.63377e-05	0.122183	0.00342829	0.123402	0.253548	0.943736	0.141195	0.835573	0.215577	0.672777	0.849771	0.532786	0.122418	0.230156	6.1015e-10
NOLC1	2.85669e-08	2.77772e-09	0.253162	0.019807	0.510212	0.400547	0.351801	0.0881645	0.604604	0.460041	0.846043	0.87409	0.709168	0.324672	0.353411	6.11395e-10
ZNF512B	7.70576e-12	0.00176187	0.280684	0.0317368	0.00618356	0.136307	0.617538	0.291095	0.643887	0.368651	0.444609	0.533975	0.831483	0.148337	0.341818	6.25408e-10
DDX1	4.28379e-08	3.375e-07	0.116758	0.00577645	0.0478734	0.48829	0.96733	0.0525843	0.969824	0.208854	0.650913	0.67453	0.922799	0.212046	0.217547	6.29182e-10
GLIS2	4.43715e-06	1.52944e-05	0.0016214	0.00884598	0.000609761	0.898082	0.9421	0.539491	0.683345	0.0457476	0.621624	0.491258	0.692561	0.111979	0.227332	6.47022e-10
SMPD2	0.00103156	2.85945e-11	0.00269643	0.172426	0.424666	0.027892	0.134216	0.896626	0.288621	0.296732	0.107195	0.640324	0.949635	0.592576	0.71668	6.54814e-10
ZCCHC8	1.96478e-09	0.000104936	0.00673669	0.002972	0.0725365	0.252237	0.765166	0.1635	0.88713	0.228756	0.473228	0.99665	0.648544	0.0882832	0.922002	6.69242e-10
KLRF1	2.61716e-06	3.6999e-11	0.165168	0.24833	0.951072	0.358468	0.00135042	0.31251	0.873147	0.635014	0.644637	0.699474	0.604842	0.791965	0.697798	6.69372e-10
HCFC2	0.000123259	2.18104e-12	0.0558186	0.0976291	0.501073	0.0578436	0.118672	0.760987	0.475216	0.461966	0.17783	0.912366	0.910766	0.43228	0.896614	6.74103e-10
TACR2	0.00250451	1.18691e-08	0.451241	0.00544062	0.0292064	0.0597498	0.0379818	0.622355	0.077578	0.811097	0.0136894	0.684872	0.675662	0.0567839	0.716148	6.80076e-10
RAB9B	0.000464708	9.64629e-12	0.0561692	0.0869114	0.282131	0.0519961	0.055712	0.761982	0.295637	0.646417	0.137414	0.998648	0.938991	0.17801	0.820219	6.82139e-10
CNOT9	8.10134e-10	5.06837e-06	0.110454	0.0227532	0.27648	0.280914	0.333453	0.125494	0.4083	0.383789	0.737083	0.351518	0.622274	0.213942	0.271241	6.83908e-10
MCTP1	0.000199827	3.66522e-12	0.0585676	0.0180418	0.464478	0.822888	0.351229	0.567183	0.80654	0.388684	0.464782	0.19961	0.414486	0.118806	0.582719	6.83977e-10
NDFIP2	2.62661e-06	2.05296e-10	0.375969	0.0269304	0.0121659	0.992648	0.154209	0.94414	0.412727	0.507956	0.482686	0.643283	0.779707	0.18087	0.558173	6.84104e-10
CCL13	0.11241	8.08381e-13	0.0408643	0.0313413	0.229481	0.207027	0.0633541	0.546378	0.848108	0.458074	0.0990863	0.747915	0.139727	0.126026	0.528703	7.05536e-10
ZMYND19	5.20254e-06	5.32347e-12	0.0720653	0.0510971	0.604127	0.173607	0.327969	0.628787	0.517358	0.371977	0.415126	0.944516	0.865564	0.663696	0.54069	7.09537e-10
NACC2	0.0031291	2.09153e-09	0.213885	0.00592129	0.0299174	0.0666714	0.131238	0.889762	0.135375	0.656731	0.0406685	0.556667	0.380429	0.0647847	0.543441	7.12997e-10
TNXB	6.77937e-09	2.20376e-09	0.137414	0.0386073	0.199139	0.604642	0.553068	0.369196	0.463129	0.579031	0.621347	0.834589	0.900768	0.442468	0.482552	7.1377e-10
ITPKB	6.08357e-05	3.68787e-11	0.182405	0.00781691	0.184458	0.256127	0.283496	0.451941	0.378512	0.605075	0.511745	0.552958	0.942659	0.182555	0.24541	7.22588e-10
ARHGAP39	0.00022659	7.08305e-14	0.46507	0.0349856	0.853107	0.717355	0.0338406	0.152949	0.536289	0.846695	0.624128	0.918969	0.689881	0.419529	0.853026	7.24458e-10
RGS20	1.35745e-07	0.660599	0.0749133	0.670283	0.0168343	0.182944	0.62623	0.00490172	0.00650284	0.107647	0.00729831	0.329497	0.0122122	0.606949	0.102991	7.3956e-10
HUNK	2.0168e-11	0.00111469	0.00379803	0.0416975	0.133628	0.743823	0.670085	0.801617	0.545618	0.151774	0.628287	0.604897	0.764751	0.0550665	0.217978	7.41679e-10
ZWINT	1.13491e-06	1.6018e-10	0.0654948	0.0319295	0.221764	0.211648	0.210937	0.457375	0.533257	0.666508	0.465619	0.992874	0.760338	0.32992	0.793371	7.55283e-10
SCT	1.6423e-10	0.00180922	0.0331412	0.0126961	0.0449895	0.488483	0.773837	0.154845	0.786313	0.0436831	0.786493	0.277784	0.862973	0.202679	0.132198	7.63463e-10
IL1RL2	0.00162795	3.72652e-09	0.748386	0.321301	0.0236544	0.0716715	0.227206	0.638263	0.00352361	0.773897	0.0220402	0.11404	0.69721	0.0746588	0.447567	7.64848e-10
ITGB4	2.40265e-08	6.06512e-08	0.305148	0.453684	0.23052	0.275464	0.0126963	0.264532	0.418557	0.19702	0.626969	0.93423	0.325414	0.314128	0.270465	7.66706e-10
TMPO	8.49569e-07	6.77713e-09	0.0480936	0.00512968	0.0825004	0.636937	0.293473	0.22936	0.730359	0.504208	0.766872	0.852271	0.698679	0.0737369	0.941699	7.78501e-10
YBX2	0.00389982	2.10664e-12	0.00747543	0.0634234	0.702839	0.531882	0.154125	0.182223	0.713606	0.0621623	0.808803	0.480056	0.872428	0.613176	0.157927	7.86661e-10
OR5K2	8.30528e-07	2.85752e-10	0.083457	0.027783	0.381533	0.0786278	0.438823	0.678861	0.478124	0.49893	0.337064	0.976253	0.748341	0.603261	0.344542	7.9187e-10
MYO10	0.200514	1.52696e-10	0.0168701	0.26729	0.572487	0.0271992	0.00150426	0.648179	0.90127	0.148224	0.0458527	0.596307	0.0618049	0.228938	0.565232	8.0334e-10
PTCH1	3.03642e-11	7.37012e-08	0.419854	0.036118	0.542927	0.606887	0.372535	0.647677	0.771342	0.372654	0.916347	0.607016	0.680721	0.930451	0.229243	8.16767e-10
ZFYVE27	0.016692	2.49094e-10	0.0551985	0.102318	0.170986	0.259381	0.000561392	0.309266	0.770121	0.106958	0.520406	0.794482	0.115755	0.162435	0.541774	8.17702e-10
ZSWIM3	4.78033e-12	0.000139454	0.0215427	0.795288	0.949636	0.105468	0.0340698	0.983996	0.836005	0.320276	0.309014	0.0677477	0.95562	0.509559	0.603196	8.21601e-10
SORCS2	1.15689e-05	9.78023e-08	0.00116879	0.0358326	0.00217802	0.779932	0.984842	0.942934	0.718537	0.0806543	0.379541	0.560076	0.356613	0.704492	0.279655	8.36433e-10
MEIS2	0.000153348	1.06543e-11	0.891384	0.00168828	0.454806	0.636778	0.175448	0.301436	0.385959	0.317011	0.549478	0.992344	0.211395	0.743429	0.169073	8.55857e-10
ZRSR2	0.00233209	0.000606396	0.00164099	0.149041	0.474022	0.00185504	0.0191063	0.240083	0.418094	0.0419074	0.0192639	0.213141	0.359474	0.413571	0.00457139	8.69448e-10
SMAD5-AS1	6.31731e-07	1.43783e-09	0.450629	0.0283729	0.443034	0.124827	0.400251	0.210947	0.430382	0.403755	0.482082	0.914413	0.157504	0.975477	0.10731	8.72024e-10
LEF1	1.13063e-05	8.52998e-06	0.000101969	0.0600724	0.019121	0.975732	0.905482	0.755121	0.905687	0.0235946	0.402171	0.364815	0.144859	0.166633	0.122558	8.85171e-10
PDE8B	3.42884e-06	6.86997e-10	0.0470538	0.0284352	0.212405	0.237244	0.0512833	0.645895	0.390977	0.298911	0.526192	0.977331	0.391636	0.66724	0.847382	8.86223e-10
PRDM5	2.5478e-08	7.13357e-08	0.0161204	0.13933	0.0606535	0.399851	0.202241	0.589024	0.752264	0.291078	0.377325	0.689067	0.923916	0.421419	0.267948	8.86563e-10
BRCC3	4.68166e-08	3.67851e-08	0.193101	0.00657931	0.347927	0.57522	0.0834489	0.159688	0.819707	0.542257	0.302084	0.978816	0.680019	0.281014	0.48378	8.9443e-10
KAT2A	2.25301e-06	1.45529e-12	0.150413	0.0268824	0.774766	0.656939	0.385787	0.153294	0.945707	0.756124	0.739678	0.89054	0.901598	0.625442	0.690508	9.15504e-10
TFAP2A	4.66747e-12	1.32142e-05	0.272435	0.359888	0.108718	0.933823	0.114612	0.97001	0.0602303	0.559121	0.446817	0.955521	0.724564	0.167563	0.620461	9.22223e-10
BMP3	0.000216293	3.8368e-08	0.0538772	0.0889411	0.173994	0.00335025	0.0299741	0.738085	0.284965	0.481586	0.00652905	0.887065	0.90078	0.257824	0.793661	9.33239e-10
TMEM189-UBE2V1	8.45733e-06	2.59645e-08	0.0204184	0.236299	0.790641	0.00661077	0.0655153	0.882942	0.379699	0.259301	0.0269222	0.367793	0.610524	0.559672	0.706257	9.35329e-10
RNF138	1.48356e-12	0.000420133	0.141504	0.0214849	0.0717827	0.173165	0.731846	0.164392	0.656667	0.677364	0.497767	0.596878	0.800072	0.405958	0.635477	9.52842e-10
RRAGB	0.000441371	1.38158e-11	0.25633	0.0745994	0.307234	0.0150622	0.040967	0.741343	0.392641	0.846899	0.0399533	0.671406	0.910663	0.728625	0.798908	9.54586e-10
ZBTB9	0.00265685	5.73077e-14	0.21816	0.130108	0.818488	0.0319117	0.15431	0.363741	0.483355	0.575686	0.150865	0.953943	0.816582	0.567572	0.669203	9.65426e-10
DUSP22	1.96314e-06	2.80346e-10	0.689506	0.00665684	0.353963	0.2096	0.0554179	0.281525	0.552202	0.981085	0.221368	0.941912	0.951816	0.344738	0.728716	9.67951e-10
ALK	0.000322369	4.12173e-08	0.0312525	0.00795604	0.0170126	0.0504668	0.0310547	0.718449	0.202937	0.226793	0.0887525	0.950178	0.705899	0.612097	0.759799	9.82834e-10
TMX1	8.25581e-12	0.00175176	0.0146803	0.0960766	0.021407	0.433342	0.595815	0.0997981	0.629724	0.212277	0.637763	0.807954	0.982584	0.141053	0.770289	1.00149e-09
ZNF79	3.73785e-07	7.31339e-08	0.260856	0.0119134	0.0207762	0.526932	0.994339	0.785868	0.282749	0.161674	0.769861	0.239182	0.506539	0.16992	0.159174	1.01095e-09
ZNF726	3.96727e-09	1.8045e-06	0.0343186	0.145026	0.259876	0.862003	0.15723	0.634699	0.812858	0.0915148	0.591887	0.399418	0.772945	0.0526565	0.14766	1.01426e-09
ZNF85	4.36322e-13	0.00198261	0.154414	0.0901549	0.452413	0.596775	0.0433413	0.479566	0.337562	0.29274	0.587317	0.62356	0.97388	0.17819	0.201519	1.02607e-09
TFEB	2.02866e-11	0.00275411	0.0194007	0.0553615	0.0192639	0.243138	0.989097	0.267315	0.489031	0.161045	0.661796	0.653434	0.655281	0.0781047	0.66496	1.0314e-09
EYA2	1.35074e-09	0.00043223	0.382309	0.0589745	0.488204	0.0125335	0.673551	0.0105871	0.157224	0.535713	0.0727092	0.151457	0.970277	0.78457	0.218596	1.05335e-09
P2RX2	1.93324e-09	1.0566e-08	0.207259	0.0399973	0.554911	0.519286	0.202113	0.572513	0.745805	0.518973	0.716081	0.765252	0.92601	0.401981	0.201423	1.0632e-09
HSFX1	0.100965	6.04339e-10	0.199529	0.091953	0.0817842	0.0286694	0.0267015	0.595489	0.0331352	0.837864	0.0587722	0.226841	0.0725952	0.0832987	0.96228	1.06411e-09
HSP90AA1	2.56641e-08	1.03935e-09	0.356129	0.00685033	0.123321	0.813618	0.870633	0.206523	0.988157	0.670178	0.903358	0.932461	0.580226	0.491855	0.496647	1.08936e-09
CDCA7	0.000183007	2.35374e-11	0.0908297	0.00702173	0.184839	0.444948	0.116593	0.316414	0.794668	0.822669	0.465713	0.964714	0.566228	0.0724975	0.930794	1.09556e-09
PLCB3	1.38074e-07	2.24356e-08	0.107479	0.0999832	0.0159273	0.843137	0.117747	0.381607	0.569701	0.164963	0.705134	0.962085	0.766619	0.314234	0.305661	1.10198e-09
RREB1	1.47812e-05	1.94512e-07	0.0148387	0.0354963	0.185143	0.818701	0.0182752	0.0798639	0.925038	0.136231	0.293139	0.928527	0.127987	0.0843906	0.767213	1.10991e-09
RBFOX2	0.0122959	4.97256e-11	0.023917	0.0255751	0.0407718	0.0478742	0.271059	0.905896	0.279305	0.50178	0.0765343	0.674818	0.506055	0.190357	0.768731	1.11719e-09
TRAIP	0.000163839	5.56314e-14	0.318385	0.0221203	0.461271	0.323202	0.27846	0.312438	0.807075	0.880418	0.558252	0.977011	0.945507	0.355806	0.9047	1.13521e-09
RAB39B	8.22691e-07	1.29897e-10	0.229428	0.0885171	0.464044	0.799877	0.226368	0.761507	0.543132	0.246433	0.676947	0.3485	0.763957	0.147435	0.202901	1.15204e-09
CRY2	1.40975e-06	1.79867e-09	0.108977	0.00460473	0.092596	0.746123	0.500688	0.607716	0.497285	0.534281	0.459289	0.81475	0.532689	0.165389	0.431725	1.15996e-09
PGAP2	2.15036e-07	6.31048e-10	0.013206	0.20448	0.18005	0.149276	0.399397	0.643549	0.843667	0.290276	0.509515	0.831745	0.926321	0.817887	0.522867	1.18435e-09
CCNE1	0.000427748	1.03226e-12	0.89033	0.000634224	0.354899	0.967731	0.862843	0.199163	0.261025	0.617379	0.980267	0.861247	0.752321	0.246238	0.281444	1.18691e-09
F2RL3	3.5559e-07	1.58706e-07	0.179701	0.0067981	0.27316	0.58407	0.964754	0.204143	0.630595	0.0942557	0.642515	0.803821	0.904115	0.060517	0.0293529	1.20692e-09
BLK	0.000126395	2.57846e-09	0.038531	0.175619	0.836491	0.356274	0.0580557	0.315173	0.500829	0.0676186	0.434067	0.629272	0.638837	0.0784517	0.0191685	1.20747e-09
EPHB4	0.000902006	9.13558e-11	0.622032	0.932702	0.49745	0.0140004	0.000494189	0.545833	0.205364	0.5222	0.0297698	0.943795	0.971857	0.723498	0.567384	1.21651e-09
IL17RD	1.30933e-06	7.39449e-06	0.00108387	0.141668	0.00863619	0.109689	0.162104	0.995429	0.257391	0.130271	0.242216	0.703827	0.949291	0.181654	0.484115	1.22045e-09
CD19	3.62309e-05	1.71682e-08	0.00977232	0.227784	0.58704	0.61485	0.102052	0.30408	0.996192	0.0239058	0.668464	0.285087	0.776225	0.335379	0.00600154	1.23296e-09
SSTR3	6.67169e-09	7.23764e-08	0.203306	0.13864	0.2842	0.962322	0.243618	0.598139	0.61533	0.153403	0.352527	0.560214	0.945315	0.123649	0.0933643	1.23607e-09
TBC1D19	2.50736e-05	4.39056e-11	0.0388517	0.0899506	0.199251	0.225368	0.0690317	0.293886	0.958653	0.510132	0.453336	0.962227	0.384054	0.677923	0.571139	1.24287e-09
PRKACA	0.000128578	1.34041e-08	0.0412185	0.00273775	0.0279756	0.520471	0.499381	0.0581029	0.967761	0.140324	0.394741	0.76171	0.924844	0.102976	0.357377	1.26734e-09
PLEKHG4	0.000876002	1.53777e-12	0.50976	0.00738808	0.769814	0.965409	0.0740887	0.220861	0.54488	0.855443	0.359772	0.930976	0.747858	0.0263144	0.602903	1.2681e-09
P2RY8	3.97393e-05	2.13702e-11	0.066575	0.0415211	0.40877	0.980387	0.537433	0.445484	0.959625	0.16439	0.5198	0.261014	0.847027	0.122568	0.234275	1.29207e-09
DIXDC1	0.000481867	2.83321e-10	0.0817196	0.0879836	0.206324	0.0173031	0.112972	0.883209	0.225605	0.615399	0.0308532	0.982348	0.556735	0.2667	0.537671	1.29376e-09
SMARCA1	2.57917e-08	1.13771e-05	0.0344557	0.0613056	0.0126349	0.522675	0.0962515	0.192785	0.596374	0.172156	0.610002	0.607038	0.573403	0.58933	0.121979	1.30631e-09
CARD11	7.32761e-11	0.1738	0.0220282	0.0850727	0.291477	0.0329185	0.188588	0.127793	0.549934	0.220463	0.0440324	0.0952772	0.193363	0.677661	0.326583	1.31511e-09
ARID5B	1.43189e-06	2.6619e-07	0.000279167	0.160926	0.391466	0.0399479	0.748329	0.93743	0.30498	0.0786581	0.209395	0.826502	0.969814	0.718409	0.223181	1.32424e-09
CYCS	2.51526e-06	1.12386e-09	0.0633054	0.00649348	0.029781	0.705459	0.8267	0.387192	0.621148	0.507368	0.481244	0.520437	0.937552	0.283543	0.743813	1.32974e-09
OR1J2	0.028455	4.28716e-11	0.565764	0.00331386	0.369788	0.0708142	0.153923	0.735346	0.190233	0.841395	0.045082	0.508198	0.486693	0.0215475	0.471891	1.33816e-09
P2RX3	0.00791105	1.22436e-06	0.0494007	0.366978	0.153512	0.000184525	0.131978	0.441653	0.652509	0.513847	0.00168398	0.0247872	0.283062	0.318505	0.338431	1.34439e-09
RPS6KA2	1.69342e-07	1.00736e-09	0.1865	0.00517076	0.183609	0.941677	0.223196	0.770097	0.474028	0.570683	0.775736	0.934919	0.743095	0.297561	0.588401	1.3522e-09
PDIA3	1.53109e-06	2.71468e-10	0.0905103	0.109162	0.141648	0.131975	0.181154	0.739475	0.368504	0.517081	0.463755	0.663188	0.760156	0.391064	0.705063	1.36423e-09
OR2A25	2.95981e-06	0.000215959	0.00240399	0.00310029	0.108708	0.0300423	0.547211	0.694265	0.262739	0.681569	0.135477	0.74056	0.952293	0.00140729	0.970399	1.45592e-09
NKX6-1	3.99558e-07	0.223566	0.0151226	0.155025	2.62575e-05	0.117496	0.851051	0.408596	0.0253431	0.0441707	0.0363887	0.54228	0.247429	0.453401	0.249392	1.46164e-09
TTK	0.000137691	9.37362e-11	0.13419	0.00224861	0.221921	0.942597	0.530125	0.0770378	0.596604	0.77676	0.393222	0.846838	0.860939	0.0442733	0.714467	1.46906e-09
NCS1	0.00689758	5.08966e-08	0.0449803	0.0262117	0.0089363	0.0251639	0.0760976	0.875899	0.335911	0.339696	0.0245044	0.55678	0.555961	0.0375051	0.701437	1.48012e-09
ARHGAP27	0.000192609	1.44633e-10	0.0635977	0.0617528	0.0824392	0.40589	0.0208401	0.527536	0.676879	0.242713	0.285513	0.823492	0.298992	0.367553	0.853925	1.5153e-09
ADGRV1	1.46637e-05	5.59646e-06	0.595939	0.196984	0.0971432	0.0139427	0.890086	0.218329	0.10721	0.0832354	0.0355717	0.0937904	0.395025	0.447235	0.0110031	1.52178e-09
PTGES2	8.68454e-06	6.19139e-10	0.0026712	0.273567	0.566569	0.0507413	0.266638	0.710449	0.679655	0.148011	0.221841	0.941751	0.817521	0.746758	0.535609	1.52406e-09
ENPP1	8.45774e-12	0.000559957	0.00220321	0.138426	0.0663391	0.870971	0.538175	0.447068	0.578568	0.245296	0.50897	0.596956	0.779093	0.654658	0.336567	1.53598e-09
YPEL5	4.93497e-05	1.02219e-11	0.278045	0.0689744	0.598705	0.140241	0.0259768	0.20247	0.460984	0.883728	0.430594	0.997373	0.880954	0.259279	0.87158	1.53728e-09
MAP4K4	0.000107286	0.028903	1.9447e-05	0.582552	0.000467624	0.702323	0.763468	0.555744	0.120171	0.00266472	0.779848	0.31656	0.108717	0.585805	0.00622144	1.57122e-09
ZBTB47	0.000113332	4.55818e-10	0.278203	0.00177523	0.043576	0.270328	0.311217	0.539115	0.473506	0.617355	0.303121	0.585304	0.573892	0.199994	0.515406	1.58145e-09
ATN1	0.00686615	1.46729e-08	0.0171658	0.00037604	0.0101467	0.465841	0.485528	0.139971	0.863589	0.186879	0.39542	0.703236	0.925601	0.0327496	0.549821	1.59296e-09
CCN4	0.453907	3.70438e-06	1.54439e-06	0.475357	0.00821232	0.0505575	0.705525	0.973202	0.917772	0.0108942	0.0299293	0.863332	0.0482917	0.206038	0.175199	1.60951e-09
SNW1	8.87598e-11	0.000851643	0.18195	0.00449094	0.126649	0.425762	0.255004	0.0651445	0.804705	0.267589	0.856177	0.6318	0.527417	0.323994	0.145052	1.61882e-09
ZNF208	4.57358e-07	4.35221e-09	0.025332	0.161686	0.405579	0.089514	0.0654802	0.677131	0.684217	0.276776	0.320249	0.885203	0.888713	0.673596	0.380651	1.62473e-09
RAD21	7.83661e-08	5.02826e-07	0.102	0.00157193	0.196552	0.350556	0.637085	0.0384016	0.765508	0.272736	0.554318	0.96835	0.830759	0.54174	0.305061	1.64916e-09
ZSCAN1	3.6e-07	8.27815e-09	0.0510324	0.0212904	0.0938791	0.28571	0.17365	0.539987	0.594957	0.595198	0.452458	0.810845	0.282538	0.631617	0.872195	1.65505e-09
WLS	0.000454566	1.33503e-10	0.0502355	0.0108364	0.307597	0.138138	0.11892	0.513944	0.744025	0.589124	0.347252	0.96835	0.655176	0.0268788	0.744883	1.66381e-09
YWHAZ	5.59096e-07	4.00703e-09	0.0894854	0.0254913	0.0537987	0.642375	0.373888	0.890423	0.396801	0.154306	0.361061	0.856684	0.713162	0.583929	0.358044	1.66498e-09
TFG	2.564e-08	4.38328e-08	0.381656	0.106637	0.0354281	0.284802	0.194255	0.864981	0.0634617	0.589669	0.5237	0.613338	0.972648	0.3582	0.511522	1.66559e-09
POGK	0.00139159	6.59183e-12	0.277858	0.0127384	0.52983	0.921462	0.461801	0.162296	0.311244	0.386183	0.169927	0.887056	0.928885	0.0335219	0.248101	1.66683e-09
FSTL3	0.612252	0.00140522	1.70682e-05	0.0211598	5.10502e-05	0.89875	0.371303	0.551457	0.252416	0.000872829	0.39187	0.780874	0.0500348	0.200883	0.0847578	1.6768e-09
VN1R4	1.70869e-05	7.59185e-08	0.412573	0.180971	0.0925007	0.0739797	0.157368	0.0667678	0.0399791	0.401325	0.245142	0.270826	0.276843	0.236025	0.346866	1.68029e-09
NR2E1	0.229715	1.11674e-08	0.0075496	0.130311	0.084904	0.0283591	0.25449	0.265718	0.0299434	0.481363	0.0154889	0.325047	0.644017	0.0144803	0.628342	1.72803e-09
ERG	0.000104924	7.94838e-11	0.0641524	0.0108238	0.376097	0.744812	0.392575	0.816913	0.625686	0.383145	0.287594	0.646994	0.44743	0.0591587	0.288451	1.7456e-09
HSP90AB1	1.98383e-06	1.50054e-10	0.150181	0.0849146	0.73683	0.0672393	0.366861	0.33789	0.445251	0.605297	0.219491	0.936853	0.664895	0.543404	0.380075	1.7474e-09
SP5	4.28483e-06	7.93376e-08	0.0208257	0.385309	0.649428	0.0169295	0.0136798	0.996776	0.276906	0.241066	0.0476315	0.313041	0.483037	0.997939	0.927507	1.77996e-09
KCNH2	2.99073e-05	6.28989e-07	0.0589575	0.0400582	0.0527214	0.0444623	0.168264	0.582414	0.248533	0.147278	0.0650476	0.703625	0.335958	0.109641	0.288997	1.78013e-09
PPFIA1	1.85907e-08	1.70453e-07	0.0827278	0.240576	0.103491	0.773528	0.29323	0.214213	0.35178	0.162926	0.728586	0.565639	0.700848	0.314766	0.110723	1.78691e-09
KCNH3	1.43411e-10	0.0012579	0.0129421	0.111139	0.0443304	0.545233	0.423512	0.240678	0.855191	0.0775	0.44998	0.336877	0.318465	0.975538	0.0938717	1.81766e-09
CHRM2	0.000820331	9.7287e-08	0.0239559	0.0676118	0.0213	0.148642	0.0341429	0.741433	0.115339	0.167538	0.00971959	0.778867	0.852323	0.162012	0.906013	1.83387e-09
PUF60	1.20251e-05	1.01397e-10	0.0144779	0.183608	0.732535	0.0632487	0.208568	0.46474	0.643246	0.262206	0.226072	0.992391	0.730567	0.731376	0.644542	1.83448e-09
ZDBF2	1.77113e-07	3.87142e-07	0.0157207	0.506144	0.115504	0.138725	0.0273263	0.461422	0.957413	0.155191	0.217686	0.698786	0.460619	0.614195	0.274842	1.8627e-09
CYTL1	0.00331292	5.67405e-10	0.00822031	0.0271078	0.0957943	0.86125	0.114071	0.544124	0.563701	0.1509	0.265885	0.894326	0.338009	0.0391985	0.337518	1.86483e-09
BRSK1	4.44534e-09	0.000249143	0.00454656	0.0324121	0.00593648	0.524132	0.750501	0.164995	0.930425	0.0832818	0.594516	0.710007	0.719988	0.30318	0.433426	1.86883e-09
RARB	3.64887e-09	4.35204e-08	0.0619134	0.0634668	0.260315	0.94164	0.178198	0.268423	0.819069	0.268764	0.974868	0.684045	0.818178	0.687217	0.333907	1.91779e-09
MAP3K13	2.47885e-05	1.79271e-06	0.00614757	0.199771	0.00161404	0.817282	0.202323	0.706434	0.181798	0.0696696	0.538287	0.273647	0.276945	0.0426549	0.930059	1.98152e-09
EBF3	4.77441e-05	1.9893e-11	0.142745	0.00931061	0.404621	0.386638	0.389093	0.927832	0.490766	0.576043	0.441372	0.691199	0.678697	0.123226	0.42382	2.02924e-09
BTK	0.000552603	7.98471e-12	0.0457352	0.0888833	0.44984	0.812229	0.137307	0.483944	0.729941	0.268944	0.252209	0.306206	0.730404	0.0979076	0.46947	2.05433e-09
GFRA1	4.56867e-08	2.13209e-09	0.252306	0.0170257	0.528748	0.844861	0.166846	0.395162	0.677979	0.694072	0.518098	0.920181	0.728668	0.256325	0.437792	2.08399e-09
GPR21	9.66975e-07	1.08693e-09	0.0435181	0.018724	0.230728	0.166054	0.590695	0.699005	0.949103	0.601591	0.413482	0.909882	0.442252	0.216968	0.811855	2.08829e-09
TNNI2	0.00307598	2.23942e-11	0.0297895	0.0451757	0.394621	0.762942	0.249617	0.24493	0.937804	0.14206	0.208972	0.345126	0.664481	0.0887409	0.235713	2.0961e-09
FGFR3	0.102011	7.80801e-13	0.148942	0.495145	0.426367	0.0322225	0.0204872	0.924666	0.165463	0.833309	0.0448043	0.276229	0.275634	0.349098	0.916251	2.11027e-09
RPN1	4.78495e-06	2.5096e-07	0.0358204	0.235715	0.214716	0.00297053	0.15525	0.983792	0.121386	0.483128	0.0273715	0.432346	0.912641	0.571202	0.649579	2.12434e-09
RAB2A	1.7113e-08	3.38668e-05	0.0194895	0.0444092	0.0149482	0.589377	0.602936	0.177595	0.822786	0.0849979	0.846438	0.294169	0.635734	0.518043	0.0859948	2.13269e-09
TGFA	0.000858654	8.63891e-10	0.342409	0.443145	0.0875916	0.0378316	0.00986311	0.920848	0.0550206	0.488113	0.0283878	0.648884	0.820462	0.339562	0.503872	2.1451e-09
AGTR2	0.000798179	6.8461e-10	0.0788708	0.0432031	0.121505	0.0756964	0.0416923	0.861429	0.1382	0.352571	0.089782	0.833548	0.994531	0.164262	0.644503	2.15101e-09
ASAP2	8.13014e-08	0.00121548	0.0122854	0.0273969	0.0251439	0.260728	0.187558	0.485399	0.542768	0.0279217	0.170351	0.644362	0.202944	0.041258	0.860987	2.16374e-09
PBXIP1	7.88102e-08	1.3723e-07	0.219253	0.00225741	0.0864713	0.736926	0.720453	0.189737	0.62469	0.347873	0.732351	0.794121	0.456684	0.216443	0.409079	2.16517e-09
ARFGAP3	5.77729e-07	1.62271e-05	0.0176544	0.042943	0.00128809	0.427389	0.408503	0.29861	0.322512	0.0783046	0.585549	0.50657	0.852108	0.163031	0.491054	2.20208e-09
NPR2	0.000611964	3.92937e-10	0.00579721	0.0553577	0.0791387	0.0914179	0.102725	0.561591	0.935951	0.539741	0.211128	0.9724	0.361936	0.289696	0.700884	2.21243e-09
TIMELESS	2.46486e-05	2.04368e-11	0.437374	0.0137226	0.63434	0.264927	0.190211	0.0988194	0.504754	0.939187	0.48988	0.84504	0.887948	0.173145	0.854652	2.21759e-09
SP8	0.00408054	2.63644e-12	0.091906	0.00224134	0.092987	0.763288	0.508183	0.145676	0.906365	0.866895	0.52534	0.942411	0.624864	0.167155	0.520805	2.21843e-09
OVOL2	0.000412632	1.24013e-07	0.00495386	0.70107	0.0275504	0.111698	0.0530458	0.961647	0.196091	0.0221575	0.239332	0.658425	0.300511	0.0787486	0.545864	2.2207e-09
PPP1R1C	0.0155553	0.153539	0.158421	0.472248	0.0101698	0.00261343	0.795476	0.0166182	0.00112647	0.0718672	0.00131318	0.0299326	0.0575001	0.435965	0.0496737	2.23386e-09
PNN	0.00116102	4.49649e-07	0.0011303	0.00159709	0.0633786	0.100558	0.763303	0.0835698	0.792907	0.367194	0.0835328	0.887553	0.894908	0.0436294	0.786573	2.26782e-09
MAPK11	0.000234966	2.58775e-07	0.0813754	0.00152733	0.011746	0.640911	0.360276	0.749357	0.270812	0.201553	0.0343567	0.232003	0.839483	0.107603	0.421985	2.27256e-09
MCM3	3.0358e-05	3.76233e-11	0.154716	0.0355844	0.812971	0.0712757	0.127734	0.232505	0.708422	0.698206	0.241902	0.987449	0.848875	0.263846	0.899795	2.29159e-09
AGO2	2.63775e-05	2.74447e-10	0.13975	0.0748389	0.848446	0.565724	0.0515548	0.0217732	0.58533	0.515991	0.47925	0.926555	0.541842	0.149519	0.598798	2.34139e-09
SLC1A2	1.25055e-11	6.91485e-07	0.321266	0.0639638	0.45212	0.979667	0.325175	0.351027	0.961428	0.422309	0.887686	0.546985	0.905785	0.627638	0.265089	2.35106e-09
CDKN1B	0.00478635	6.86821e-08	0.0869564	0.12497	0.198108	0.00572744	0.142701	0.950984	0.0371841	0.121642	0.0114801	0.883351	0.30459	0.422093	0.0826744	2.35913e-09
NKX2-8	0.000340039	0.0189841	0.11862	0.431644	0.00232247	0.103315	0.941855	0.18675	0.00234229	0.046676	0.000221562	0.0912324	0.231863	0.742404	0.0507146	2.36509e-09
MS4A6A	0.0282332	3.3245e-12	0.0212136	0.0819585	0.327001	0.876734	0.196433	0.53735	0.533852	0.344042	0.0560352	0.339321	0.424526	0.0384534	0.956607	2.36633e-09
GFI1B	1.49701e-13	0.00766236	0.144295	0.0234386	0.372386	0.226597	0.737257	0.538606	0.159992	0.64283	0.67497	0.541214	0.631406	0.279252	0.314586	2.3764e-09
ARID4A	0.0237434	0.0181496	8.26341e-06	0.928785	0.0724427	3.72173e-05	0.413656	0.69732	0.198414	0.0983382	0.000283289	0.853253	0.316898	0.554253	0.128993	2.40151e-09
EPHA7	7.69434e-06	4.58434e-08	0.0755213	0.0576025	0.138887	0.0552387	0.17614	0.710231	0.362711	0.323077	0.123093	0.960224	0.30571	0.19478	0.228849	2.42126e-09
GNGT2	0.0108058	8.87845e-11	0.08519	0.0118239	0.198835	0.49145	0.434278	0.56046	0.48409	0.229649	0.150949	0.556766	0.338124	0.00745699	0.516532	2.43206e-09
LECT2	7.38734e-06	0.000216283	0.000395987	0.563759	0.00487474	0.63587	0.428337	0.790768	0.214614	0.00420015	0.747572	0.300915	0.069562	0.133856	0.401589	2.45897e-09
ZMYND8	0.000330081	9.92676e-06	0.0336738	0.108356	0.310214	0.661396	0.0102238	0.539537	0.963287	0.0349046	0.119245	0.232962	0.0198366	0.0541258	0.0212842	2.48944e-09
HELLS	4.0529e-05	8.00627e-10	0.0243206	0.00331933	0.207732	0.974477	0.294719	0.179562	0.692446	0.650748	0.562535	0.871005	0.805282	0.0600101	0.965557	2.49115e-09
RAB14	1.02189e-08	0.000451577	0.164309	0.00862137	0.00150572	0.970599	0.891156	0.32021	0.224179	0.101912	0.75176	0.620186	0.481868	0.216792	0.0995392	2.57098e-09
CASP10	1.90614e-05	9.82961e-08	0.0838406	0.0309784	0.0139536	0.301916	0.0573028	0.50272	0.663422	0.126436	0.431648	0.434577	0.162036	0.393818	0.50957	2.57232e-09
TNFRSF11A	3.76128e-06	2.06348e-07	0.11179	0.147371	0.0121967	0.174021	0.0290405	0.54823	0.404135	0.126245	0.271262	0.811023	0.442812	0.226222	0.629512	2.59491e-09
ZNF330	7.76747e-09	0.00546119	0.029842	0.00921275	0.183137	0.124166	0.341134	0.0408081	0.933716	0.0615437	0.279023	0.562408	0.464005	0.268979	0.0742739	2.61193e-09
EN1	0.020297	0.000175487	0.000387089	0.105279	0.000311886	0.820845	0.190759	0.370206	0.231313	0.0115804	0.241424	0.484576	0.0178774	0.191442	0.111162	2.63811e-09
ZDHHC6	7.37793e-06	3.84674e-09	0.174156	0.00559255	0.0994275	0.546115	0.321922	0.489411	0.743906	0.230713	0.706771	0.358358	0.799841	0.17528	0.218964	2.65446e-09
SGSM2	1.18441e-06	1.00186e-07	0.3357	0.0424839	0.0253982	0.239035	0.397667	0.938811	0.129034	0.328984	0.504664	0.567296	0.220275	0.185809	0.165716	2.65825e-09
HOXD1	2.74084e-12	0.000278359	0.0196266	0.162686	0.17499	0.785349	0.785893	0.577003	0.668137	0.287856	0.931576	0.522717	0.730396	0.0688349	0.444954	2.66968e-09
ZNF185	8.78069e-05	0.00907349	0.298331	0.386218	0.000540831	0.520725	0.763263	0.657369	0.00027373	0.0590027	0.00104333	0.81955	0.199718	0.302031	0.0296165	2.68162e-09
KLRG1	0.000264863	8.16186e-11	0.0578415	0.123012	0.745012	0.216492	0.157654	0.560709	0.608649	0.10151	0.155815	0.489866	0.437392	0.11295	0.628784	2.68917e-09
TLR6	0.00102731	9.34047e-13	0.0438942	0.15768	0.634027	0.300701	0.179125	0.7118	0.511413	0.230887	0.296184	0.525921	0.597997	0.226524	0.800871	2.69442e-09
ELK3	4.89275e-06	4.05139e-10	0.0105732	0.00807443	0.097413	0.856061	0.984071	0.746295	0.927524	0.358656	0.950719	0.66035	0.590119	0.495652	0.518108	2.73e-09
GDF3	1.61461e-06	1.04622e-06	0.00684969	0.0472376	0.25406	0.181154	0.314764	0.422348	0.645553	0.274855	0.17186	0.904061	0.0753896	0.192827	0.251402	2.78352e-09
ZDHHC1	2.54193e-09	0.0860195	0.0256159	0.00216967	0.00826324	0.216216	0.420804	0.0246277	0.734113	0.0831835	0.517606	0.622331	0.704133	0.222961	0.499345	2.84342e-09
DEPDC1B	2.43169e-06	7.82262e-11	0.144841	0.0239066	0.395068	0.517949	0.204145	0.32667	0.713039	0.905832	0.799459	0.889534	0.901505	0.107085	0.875861	2.85586e-09
OR8U8	0.000204731	6.62585e-06	0.288106	0.0485544	0.249813	0.00758638	0.0116823	0.225071	0.64589	0.272955	0.00494925	0.123965	0.651182	0.771858	0.0684833	2.87348e-09
ZNF25	5.5878e-05	5.48172e-11	0.0331807	0.241854	0.327564	0.0646818	0.0921601	0.811506	0.279767	0.406297	0.233614	0.910051	0.880067	0.482062	0.890126	2.89351e-09
ARAP3	1.93204e-11	0.432149	0.143149	0.0328362	0.00531123	0.076202	0.0872497	0.674868	0.303823	0.241477	0.261349	0.338145	0.897981	0.790423	0.0832123	2.90939e-09
GMEB2	0.0165446	8.78078e-11	0.0666636	0.479093	0.892563	0.0218705	0.0136502	0.401979	0.828763	0.19693	0.0346485	0.546613	0.151839	0.394329	0.393756	2.93298e-09
GLIS1	7.94502e-06	2.15543e-08	0.00520844	0.015598	0.294973	0.969237	0.497909	0.219236	0.765394	0.110567	0.691014	0.536279	0.690212	0.304683	0.129266	2.97965e-09
GPR173	1.52635e-06	1.69976e-06	0.00807411	0.0454833	0.00619993	0.244776	0.206288	0.602538	0.847089	0.170686	0.342762	0.741276	0.528232	0.305833	0.353211	3.01792e-09
ROPN1L	0.00140879	1.52332e-06	0.00417156	0.0116591	0.229498	0.265188	0.106711	0.185299	0.77575	0.0535488	0.335898	0.988938	0.0261086	0.0297923	0.28189	3.03702e-09
NSD2	4.54503e-07	2.65207e-08	0.0496003	0.011489	0.392973	0.574545	0.328154	0.0360009	0.886619	0.593629	0.462203	0.919312	0.373905	0.329808	0.766289	3.07828e-09
KLF3	2.03108e-07	0.000160941	0.00821024	0.111701	0.00214321	0.729251	0.364345	0.518616	0.406529	0.0269559	0.390902	0.602363	0.270549	0.0754637	0.839124	3.10227e-09
IL11RA	1.45963e-05	5.83644e-11	0.188901	0.219461	0.416866	0.0508219	0.0535607	0.583428	0.76329	0.707654	0.138226	0.922573	0.681508	0.422618	0.844198	3.1035e-09
INHBA	0.378189	7.96883e-05	2.9525e-06	0.102674	0.000739963	0.335459	0.803499	0.818016	0.755349	0.00284816	0.195144	0.951099	0.0956633	0.126719	0.0555043	3.15423e-09
ZBTB20	1.77319e-08	1.26617e-07	0.209461	0.0331786	0.44659	0.0663118	0.555798	0.355933	0.321618	0.550299	0.305495	0.93879	0.462492	0.926085	0.204527	3.1883e-09
TLR4	0.00603731	3.08896e-12	0.0361518	0.102695	0.413237	0.417917	0.117495	0.847263	0.39724	0.392527	0.0903243	0.245158	0.367881	0.299961	0.901031	3.20074e-09
P2RX7	0.000417673	1.34688e-10	0.037045	0.0311046	0.167866	0.428943	0.314	0.756718	0.355109	0.226772	0.107523	0.488412	0.688833	0.158194	0.800887	3.20454e-09
G3BP1	1.47622e-10	2.05544e-07	0.485785	0.0643566	0.460873	0.384191	0.507872	0.165138	0.625417	0.62912	0.850084	0.860633	0.543362	0.442331	0.422037	3.21594e-09
TGS1	5.61195e-08	4.61689e-07	0.077672	0.0041703	0.0773897	0.277734	0.839254	0.0743477	0.620238	0.536876	0.602127	0.98827	0.820354	0.366634	0.613772	3.21814e-09
BTG2	0.000496332	4.01159e-12	0.612514	0.0176308	0.144517	0.905528	0.071127	0.603523	0.36132	0.563191	0.748782	0.704795	0.359157	0.378617	0.233955	3.22352e-09
LATS2	0.000239776	3.96907e-09	0.000538739	0.0299792	0.0777147	0.18085	0.334519	0.691262	0.850593	0.141562	0.453226	0.946854	0.604672	0.472729	0.564361	3.24467e-09
ZNF585B	5.53843e-08	9.53754e-07	0.00235657	0.231865	0.167858	0.175553	0.289589	0.744094	0.484024	0.119402	0.518382	0.904276	0.969747	0.86089	0.101125	3.26012e-09
KIFAP3	1.61935e-09	0.000686443	0.0142329	0.498133	0.041759	0.50235	0.10658	0.338839	0.50485	0.0246413	0.5378	0.83609	0.192489	0.524116	0.12738	3.31627e-09
ETS1	0.00297344	1.09767e-10	0.00424353	0.0406902	0.230111	0.964755	0.462109	0.676726	0.998813	0.101313	0.306754	0.405115	0.400962	0.074087	0.302155	3.38548e-09
CBX8	0.000161323	8.17026e-13	0.0803766	0.236964	0.669279	0.113373	0.0742825	0.764867	0.684462	0.389321	0.376701	0.830874	0.916486	0.698735	0.800813	3.50258e-09
BAG1	5.27874e-06	2.36498e-05	0.000190006	0.311978	0.00181877	0.262239	0.933537	0.931257	0.422101	0.0287152	0.323431	0.514914	0.67058	0.275554	0.411598	3.5472e-09
RGS13	4.4383e-05	1.94169e-10	0.106579	0.32537	0.83338	0.0372117	0.0161699	0.518815	0.559874	0.534281	0.133881	0.575232	0.980763	0.475055	0.564536	3.54727e-09
CREBL2	0.00207115	2.3396e-12	0.0851957	0.144545	0.695371	0.153071	0.0562279	0.669722	0.292943	0.465065	0.119565	0.883969	0.566672	0.247859	0.975636	3.55188e-09
CBLC	0.000469652	5.46716e-10	0.130148	0.384384	0.056224	0.138622	0.0237555	0.638652	0.119942	0.31958	0.31594	0.675439	0.473035	0.185503	0.436985	3.57608e-09
SNAPC2	0.0220943	3.63347e-08	0.024861	0.00153292	0.0296462	0.717493	0.194301	0.0781054	0.876094	0.128077	0.142637	0.825642	0.348467	0.0229858	0.459528	3.59747e-09
MUTYH	0.203389	1.3666e-13	0.00724407	0.140265	0.289838	0.117383	0.0923687	0.858531	0.566443	0.350984	0.211345	0.489577	0.583505	0.53318	0.998585	3.6332e-09
MTA2	8.61889e-09	2.86558e-08	0.0845691	0.114684	0.553605	0.292725	0.101683	0.180028	0.621421	0.659903	0.638693	0.950831	0.655157	0.492103	0.90057	3.77674e-09
STMN2	2.02868e-05	5.12878e-07	0.0126025	0.0469075	0.0234768	0.305439	0.0371985	0.480403	0.536088	0.110442	0.0873002	0.998238	0.629249	0.366268	0.557148	3.82112e-09
TNFSF14	0.00068922	1.89555e-09	0.00971472	0.0287736	0.534758	0.136531	0.462759	0.369433	0.855556	0.141867	0.0818465	0.601764	0.656875	0.0534486	0.554482	3.86472e-09
ZFYVE1	4.39867e-05	4.73481e-11	0.110088	0.00475528	0.112943	0.611427	0.407799	0.338004	0.977026	0.760415	0.563342	0.846822	0.967953	0.157528	0.951801	3.88233e-09
ZNF346	1.02725e-06	1.28264e-09	0.411457	0.0635328	0.0584889	0.352345	0.0510253	0.78247	0.798945	0.604383	0.308754	0.593982	0.749437	0.61379	0.463271	3.88754e-09
STAT5A	0.0148195	1.9535e-11	0.0325756	0.00772121	0.134001	0.669806	0.732175	0.54309	0.518967	0.239791	0.100446	0.305601	0.804399	0.0855475	0.788532	3.90778e-09
HSF5	4.05167e-05	1.0555e-09	0.0122007	0.184828	0.757464	0.148796	0.162654	0.316542	0.908957	0.118985	0.20363	0.65019	0.924309	0.287761	0.253088	3.91174e-09
ID1	0.0410317	7.14702e-09	0.00100897	0.296462	0.0202863	0.0125569	0.493708	0.795376	0.137493	0.162611	0.0260396	0.733363	0.5066	0.322341	0.887681	3.93068e-09
HTATSF1	9.45152e-05	4.02616e-09	0.0986619	0.00285261	0.257705	0.96397	0.161515	0.15602	0.845466	0.479018	0.176165	0.93012	0.54478	0.0451209	0.500285	3.95193e-09
HTR3A	1.16262e-06	8.83225e-10	0.083631	0.0348259	0.0778601	0.781541	0.117114	0.693643	0.992675	0.484155	0.623758	0.689097	0.734913	0.542237	0.453153	3.97474e-09
PSD	0.00377402	3.30063e-08	0.0577882	0.0330944	0.020299	0.096295	0.0648422	0.834052	0.129916	0.249674	0.0231733	0.800458	0.430001	0.290431	0.293878	3.99869e-09
ZBTB5	0.0314516	2.24859e-08	0.00632406	0.0158523	0.122285	0.850807	0.298748	0.0551473	0.897323	0.046991	0.208137	0.801359	0.404425	0.0233902	0.0691396	4.01365e-09
PLAA	3.48822e-08	2.12513e-06	0.0451839	0.0203228	0.0691593	0.601137	0.92474	0.0748182	0.72561	0.144619	0.68993	0.707187	0.354619	0.286142	0.560096	4.06916e-09
CLP1	2.0557e-06	1.571e-07	0.0537177	0.188125	0.508015	0.00589018	0.548015	0.457039	0.493063	0.371001	0.0460574	0.74086	0.273678	0.971956	0.14086	4.08104e-09
TAS2R39	0.131622	1.03408e-09	0.227925	0.035213	0.10043	0.217467	0.00516405	0.358326	0.769223	0.241982	0.116486	0.567049	0.538185	0.00802405	0.250257	4.15567e-09
RAB37	1.41732e-09	3.12576e-06	0.11389	0.0359045	0.602937	0.502445	0.476263	0.56628	0.647729	0.242557	0.393276	0.311832	0.356631	0.215286	0.269796	4.17674e-09
IL6ST	8.04888e-05	8.70201e-12	0.028971	0.173734	0.686839	0.117937	0.170184	0.691423	0.592622	0.35363	0.319506	0.878764	0.837614	0.457433	0.785146	4.19745e-09
NFIB	0.00369047	3.47222e-08	0.00435529	0.434638	0.576042	0.000824214	0.214205	0.871544	0.348946	0.144854	0.00662076	0.91194	0.380987	0.960016	0.247967	4.199e-09
ZC3H12C	4.76521e-06	4.56077e-10	0.0739634	0.0837205	0.407462	0.275365	0.119289	0.443342	0.73757	0.534379	0.354409	0.654493	0.857046	0.153318	0.629896	4.24554e-09
FLT3	3.98275e-06	2.4142e-09	0.0602342	0.0510407	0.490727	0.961936	0.184063	0.652265	0.462583	0.218115	0.346528	0.280879	0.458603	0.158296	0.510239	4.27151e-09
HCAR1	0.328679	5.81504e-11	0.0742301	0.00930628	0.109971	0.564079	0.158279	0.703041	0.0644689	0.75147	0.0399267	0.932666	0.723846	0.014652	0.353426	4.30634e-09
YOD1	5.70137e-07	0.000173028	0.0100024	0.0167429	0.0319163	0.393869	0.762338	0.0763704	0.375745	0.113746	0.073085	0.764769	0.588285	0.0420236	0.868208	4.3247e-09
ADAM9	3.00422e-10	1.65185e-05	0.0841987	0.150986	0.0687341	0.842049	0.475335	0.67628	0.109601	0.274862	0.749482	0.355518	0.871136	0.119467	0.635409	4.34023e-09
TLR7	0.00927988	9.24775e-12	0.0160313	0.0578752	0.262656	0.941979	0.331923	0.703601	0.495112	0.224191	0.111136	0.20472	0.672938	0.105508	0.757417	4.34922e-09
SOX18	1.58543e-05	6.86206e-08	0.248271	0.00158332	0.162215	0.598478	0.600432	0.266531	0.683254	0.195457	0.260472	0.619289	0.759968	0.0377154	0.152831	4.36005e-09
ACVR1	0.000156188	1.4545e-08	0.0279478	0.00317769	0.0999882	0.9313	0.867009	0.0611953	0.294253	0.277293	0.611616	0.341512	0.952438	0.166283	0.236504	4.40665e-09
RHOV	1.3524e-07	1.14754e-07	0.313413	0.381733	0.158412	0.0852841	0.169822	0.889268	0.0531707	0.19351	0.283151	0.993032	0.663808	0.298701	0.297695	4.45944e-09
CDK11B	0.19184	2.6783e-09	0.00247921	0.139317	0.00312816	0.603782	0.0742539	0.241091	0.628255	0.0273412	0.215059	0.337477	0.473198	0.374498	0.520058	4.66872e-09
ASAP3	4.73483e-08	1.80105e-07	0.0778743	0.0175905	0.103428	0.510762	0.373648	0.477982	0.82607	0.208949	0.737797	0.413129	0.702202	0.336832	0.509308	4.71296e-09
H2BC11	4.73215e-06	3.64798e-08	0.016881	0.0546443	0.234391	0.163231	0.067526	0.991809	0.292966	0.304262	0.282608	0.693806	0.873333	0.549978	0.206556	4.75674e-09
GSN	5.31505e-05	6.73836e-10	0.0627139	0.00253932	0.144797	0.902208	0.242393	0.202134	0.86807	0.587495	0.439389	0.768447	0.776484	0.206379	0.711106	4.79934e-09
CHRNA1	0.0037624	1.11436e-11	0.952856	0.0057504	0.647961	0.189772	0.00735879	0.699743	0.478079	0.915825	0.369594	0.329701	0.334449	0.663494	0.431278	4.92592e-09
SAV1	0.0156736	2.34968e-09	0.0284402	0.175065	0.323137	0.012412	0.00200559	0.97376	0.636308	0.367815	0.0360685	0.179456	0.496841	0.737254	0.941684	4.96304e-09
RHOU	1.97594e-11	0.00361817	0.335342	0.0494712	0.415217	0.238214	0.513831	0.501335	0.141955	0.160554	0.477333	0.507061	0.127882	0.613434	0.0574835	4.96894e-09
ILF2	8.34899e-07	9.38625e-10	0.351614	0.0163695	0.18872	0.367959	0.771914	0.539683	0.331092	0.628333	0.62544	0.799509	0.413997	0.328126	0.416892	5.04939e-09
ZNF829	1.53347e-09	6.26464e-07	0.0841033	0.156213	0.181435	0.569732	0.0804002	0.786734	0.470727	0.537521	0.278458	0.949883	0.46186	0.763939	0.402655	5.12454e-09
PTPN14	0.000131743	1.60781e-09	0.0172413	0.02956	0.0173606	0.155149	0.311982	0.961375	0.394517	0.513237	0.356408	0.814952	0.837993	0.274482	0.665342	5.12586e-09
PARP15	3.3707e-05	1.10559e-09	0.0125338	0.116164	0.794805	0.132301	0.19006	0.732207	0.734734	0.0750978	0.23711	0.615933	0.888841	0.405543	0.342524	5.14951e-09
CAPN15	0.00384127	7.91732e-10	0.047837	0.170724	0.297344	0.0717354	0.0102894	0.150191	0.596222	0.196508	0.200468	0.911736	0.197576	0.410338	0.557785	5.16297e-09
PRKACB	0.000122955	3.77061e-10	0.0168232	0.318188	0.31528	0.156594	0.0239627	0.446013	0.770751	0.162719	0.330268	0.965489	0.595667	0.67632	0.381038	5.21468e-09
TNFSF9	5.161e-16	0.0220498	0.977728	0.684902	0.661902	0.90552	0.280623	0.351232	0.401736	0.321788	0.950101	0.611322	0.627212	0.816924	0.0464495	5.21747e-09
TNK1	4.70865e-05	7.10807e-07	0.00238165	0.461972	0.0311069	0.0489523	0.0544953	0.992152	0.13934	0.0962825	0.177435	0.880764	0.849475	0.372218	0.401757	5.2315e-09
CHRNB4	1.12081e-05	4.4597e-08	0.16943	0.0163087	0.0210096	0.11542	0.0445463	0.597104	0.435397	0.562964	0.125595	0.936632	0.98328	0.344412	0.928832	5.23382e-09
SORBS3	4.7919e-05	1.05379e-05	0.0161842	0.000891019	0.00596399	0.750494	0.261599	0.190938	0.818647	0.0947415	0.438118	0.806754	0.68654	0.0617347	0.431672	5.27352e-09
RTKN2	3.2485e-06	1.13232e-06	0.00526215	0.00123456	0.242739	0.218432	0.364429	0.245953	0.86665	0.89546	0.236004	0.976675	0.595984	0.0689869	0.989348	5.31901e-09
OMP	0.001052	2.73123e-08	0.119503	0.053802	0.0365203	0.189893	0.0117866	0.406567	0.679179	0.158963	0.314538	0.807881	0.103751	0.143685	0.335684	5.39528e-09
TOM1L1	1.23396e-07	7.25848e-05	0.0339721	0.0864755	0.00153129	0.623597	0.276803	0.534703	0.308644	0.122274	0.462517	0.346573	0.81014	0.100928	0.465799	5.45943e-09
ATAD2	2.73466e-05	6.54215e-10	0.159985	0.00265284	0.37313	0.9211	0.304887	0.0369926	0.784044	0.793648	0.563966	0.920736	0.888711	0.131182	0.776904	5.48027e-09
AMBP	0.012082	2.7516e-08	0.00345845	0.346594	0.162701	0.00509096	0.0620175	0.836298	0.121094	0.753357	0.0274591	0.135862	0.473876	0.32256	0.99268	5.58373e-09
ZNF804A	0.00145018	2.12659e-10	0.00647794	0.0707193	0.384994	0.969592	0.222669	0.820602	0.784953	0.0650752	0.116326	0.227869	0.683558	0.169959	0.60527	5.73471e-09
KRBA2	1.55413e-08	4.35903e-08	0.189896	0.0864764	0.314919	0.124693	0.392033	0.80951	0.444148	0.412824	0.434418	0.814192	0.559765	0.76585	0.242708	5.81531e-09
PDCD1LG2	0.0964712	7.87005e-10	0.000411383	0.0787177	0.185932	0.669582	0.407744	0.864054	0.545211	0.0283267	0.115531	0.550109	0.393473	0.0544367	0.415532	5.84481e-09
FOXQ1	0.20153	4.68255e-08	0.0525804	0.917564	0.135651	0.00416882	0.0427372	0.580807	0.191832	0.0133268	0.00596838	0.496704	0.20225	0.167324	0.577425	5.86421e-09
ARID3C	3.34612e-07	4.22806e-09	0.194405	0.0843164	0.632951	0.341557	0.103622	0.384486	0.777097	0.765803	0.590068	0.676145	0.337804	0.100544	0.59387	5.90918e-09
GPR89A	0.320762	4.48248e-08	0.000230029	0.13217	0.00278621	0.523592	0.197486	0.506305	0.61018	0.0326521	0.225806	0.212336	0.283209	0.132858	0.417764	5.91316e-09
NEK4	8.0194e-05	1.96501e-06	0.00441531	0.0126506	0.0899942	0.589536	0.178425	0.0508043	0.832394	0.0844209	0.508642	0.709785	0.27001	0.0711671	0.464867	5.9214e-09
PLAGL2	0.000507653	5.35877e-11	0.95258	0.0659962	0.824108	0.0614872	0.0167383	0.275194	0.711156	0.473084	0.172838	0.400911	0.449688	0.945031	0.244613	5.95712e-09
MUC1	2.77945e-05	2.96964e-06	0.0192661	0.547322	0.0159266	0.0494299	0.111198	0.975736	0.091843	0.056456	0.12482	0.575962	0.403237	0.148175	0.594543	6.03243e-09
RABL2A	7.66333e-07	4.30153e-06	0.0958957	0.230045	0.0992768	0.0186928	0.0390815	0.910403	0.0701694	0.396026	0.0767145	0.604235	0.716283	0.61814	0.362303	6.06627e-09
PCGF5	1.56241e-10	0.981479	0.0245315	0.112216	0.00824314	0.0134904	0.437686	0.643729	0.626711	0.0552811	0.096701	0.548094	0.205509	0.268102	0.74156	6.06694e-09
RAB40A	5.99898e-10	2.76211e-06	0.0678067	0.089382	0.117295	0.38759	0.502783	0.39466	0.833116	0.394653	0.590032	0.719052	0.671992	0.438131	0.267101	6.07351e-09
PPRC1	4.778e-05	1.19145e-10	0.0602983	0.250503	0.835387	0.262535	0.0521726	0.0959018	0.621608	0.390222	0.507251	0.926741	0.345829	0.324176	0.825947	6.08447e-09
PITX3	0.00634792	3.07109e-05	0.00178417	0.048737	0.00420437	0.22295	0.234616	0.634841	0.421307	0.00780604	0.428754	0.457921	0.0907481	0.0551612	0.131283	6.1195e-09
PAX9	4.90328e-06	0.00293389	0.712899	0.0265993	0.0460338	0.0529529	0.246994	0.687741	0.00704845	0.150015	0.00304736	0.901	0.101902	0.612223	0.0497433	6.17796e-09
ZNF304	6.11328e-06	1.07768e-09	0.0573439	0.177575	0.0686494	0.353225	0.0885319	0.645832	0.839979	0.300757	0.561626	0.719793	0.592027	0.6263	0.291409	6.21585e-09
VHL	0.13533	0.000108581	0.00206306	0.532784	0.0456187	0.56387	0.0451442	0.0490019	0.353649	0.00394132	0.613988	0.317757	0.0132839	0.114946	0.00268986	6.21649e-09
RND2	9.90208e-10	0.00356074	0.0294002	0.0643167	0.00911638	0.829829	0.0626638	0.326685	0.935531	0.113193	0.551392	0.588823	0.817634	0.157412	0.225674	6.23636e-09
RBL1	0.000170778	7.93243e-10	0.118509	0.00206049	0.354203	0.858958	0.296638	0.0563189	0.657645	0.64776	0.461057	0.809067	0.744477	0.0714229	0.73385	6.28612e-09
TRAF3IP2	0.000260505	0.000112942	0.00010502	0.934626	0.00945419	0.0388311	0.087433	0.659654	0.911401	0.00898836	0.101945	0.691637	0.535885	0.24605	0.22597	6.32839e-09
YY1	4.28735e-05	5.1449e-11	0.0861424	0.0864335	0.450759	0.317568	0.189858	0.243252	0.568094	0.764135	0.268899	0.937518	0.555686	0.174244	0.933258	6.4203e-09
MOK	0.000771504	5.67638e-06	0.00577559	0.0514848	0.00598853	0.73339	0.0984793	0.99131	0.204606	0.0511544	0.336631	0.177787	0.928341	0.0223875	0.147906	6.42635e-09
SAP30L	0.00052664	4.0209e-11	0.124501	0.0712841	0.311026	0.0430856	0.286771	0.969852	0.25838	0.591398	0.10168	0.791592	0.42272	0.412527	0.721519	6.46419e-09
EIF2A	2.53081e-09	0.0015422	0.0243601	0.0162501	0.0348139	0.269018	0.594235	0.158085	0.71208	0.081787	0.594248	0.480577	0.670859	0.289848	0.24862	6.50274e-09
KLF10	0.000245812	2.63369e-10	0.0413718	0.0304787	0.0781277	0.167454	0.0897808	0.809377	0.569185	0.525077	0.338499	0.872863	0.988257	0.17964	0.912953	6.57845e-09
VPS36	0.000156315	0.000707233	0.00765304	0.00851425	0.00322806	0.0309647	0.945922	0.285662	0.479294	0.0454757	0.0783085	0.849203	0.340071	0.0877239	0.132232	6.58585e-09
ZNF552	0.571441	1.91796e-07	0.000908941	0.119564	0.0142151	0.162318	0.0411096	0.870978	0.845187	0.0163388	0.0636072	0.497211	0.126474	0.0644717	0.322542	6.66144e-09
HOXC5	1.32134e-07	0.0013295	0.145103	0.00191426	0.00565485	0.0899089	0.512193	0.214427	0.813923	0.0624468	0.0882343	0.827058	0.678288	0.919353	0.179784	6.67295e-09
SIPA1	4.61025e-06	1.74018e-05	0.130061	0.00274279	0.00756508	0.423917	0.756367	0.0620759	0.862872	0.0876991	0.574296	0.703901	0.501555	0.14825	0.116725	6.71985e-09
GPRC5A	1.34855e-07	1.55145e-07	0.622125	0.320768	0.0707441	0.464969	0.0683524	0.983991	0.0817236	0.245859	0.544911	0.850975	0.691394	0.189332	0.101901	6.73609e-09
ADRA1D	8.37018e-09	6.22934e-05	0.0354482	0.00360672	0.0181761	0.898327	0.359879	0.965715	0.236393	0.282513	0.628884	0.37624	0.6466	0.308597	0.962518	6.73648e-09
PDE9A	2.43701e-08	1.31868e-06	0.094556	0.051708	0.0378858	0.546137	0.20094	0.513653	0.531645	0.589476	0.420741	0.793315	0.82168	0.0605813	0.659953	6.75757e-09
ARL3	0.00641573	2.10618e-09	0.0330993	0.00266571	0.0423211	0.975319	0.0327772	0.372284	0.592246	0.465701	0.120729	0.738722	0.448396	0.185024	0.940994	6.75803e-09
TET1	3.3464e-10	2.09916e-05	0.0566577	0.0871343	0.047841	0.670802	0.373448	0.710994	0.43655	0.179348	0.780407	0.84903	0.912732	0.920138	0.0897674	6.76862e-09
RGN	3.35361e-13	0.00169315	0.159462	0.102269	0.14237	0.888165	0.177726	0.520202	0.64485	0.431271	0.992374	0.767443	0.958853	0.121704	0.434476	6.79716e-09
RIN1	2.16937e-08	1.36492e-05	0.1953	0.628308	0.0623263	0.194047	0.0717071	0.595961	0.0965202	0.107812	0.52678	0.929201	0.720738	0.105498	0.165818	6.97862e-09
C1QBP	1.17076e-09	1.6735e-07	0.153972	0.0304024	0.167025	0.738257	0.769427	0.480407	0.852197	0.438927	0.984688	0.8455	0.448851	0.639597	0.324768	7.01078e-09
CD48	0.00125393	5.77051e-11	0.0393481	0.0711067	0.528449	0.918342	0.13566	0.342106	0.836709	0.276107	0.24341	0.388799	0.601362	0.0537441	0.379765	7.0515e-09
NELFA	6.66238e-07	1.13465e-09	0.0349825	0.221949	0.630115	0.158657	0.168278	0.569151	0.492559	0.414758	0.433837	0.927437	0.610447	0.525388	0.832903	7.09443e-09
PDK4	0.000826328	2.09012e-11	0.31176	0.0350294	0.575572	0.0739857	0.0536447	0.759441	0.398914	0.814306	0.089834	0.879097	0.648636	0.355095	0.658738	7.2571e-09
MIXL1	2.76631e-10	0.00539331	0.0437849	0.171066	0.227242	0.0419916	0.639292	0.686828	0.773796	0.178794	0.0987013	0.154187	0.794335	0.178769	0.091453	7.28399e-09
TIGD2	0.000353095	1.4063e-09	0.29676	0.00212321	0.029285	0.728534	0.449475	0.191361	0.83205	0.492235	0.629341	0.381818	0.552415	0.141597	0.290116	7.2923e-09
CYP27B1	0.00111686	1.61056e-11	0.470125	0.0329364	0.66228	0.027225	0.150313	0.495693	0.347354	0.814114	0.090564	0.875156	0.53472	0.531786	0.547762	7.38993e-09
PEG10	5.41099e-08	9.88188e-06	0.015634	0.191461	0.0409681	0.262795	0.0384284	0.459898	0.970905	0.184167	0.270419	0.856289	0.580697	0.4697	0.380415	7.39824e-09
LGR4	1.05161e-07	4.42627e-05	0.0179735	0.138416	0.0100961	0.925763	0.191898	0.606157	0.350671	0.0609837	0.641024	0.480924	0.335046	0.0522246	0.901905	7.40445e-09
CDKN1C	1.3978e-10	0.000694345	0.12633	0.0238918	0.0284463	0.83358	0.253311	0.455896	0.400209	0.12416	0.963585	0.566794	0.853499	0.109236	0.651023	7.4509e-09
SEPTIN5	1.70806e-07	4.92191e-05	0.00683958	0.00967334	0.00469552	0.785768	0.357481	0.643742	0.714818	0.144546	0.496574	0.728305	0.5209	0.219797	0.665776	7.54707e-09
FANCC	9.78434e-06	4.98967e-08	0.117052	0.00400846	0.576315	0.733765	0.117787	0.0092014	0.576135	0.525449	0.83034	0.604426	0.457313	0.443203	0.417115	7.5604e-09
ASGR2	1.65801e-07	4.40802e-08	0.0217042	0.159451	0.0419192	0.623465	0.673738	0.583141	0.927484	0.2889	0.467493	0.910405	0.669359	0.0914707	0.752916	7.62796e-09
ECT2	1.85728e-06	1.17057e-08	0.244341	0.00795694	0.467123	0.817939	0.225734	0.290875	0.260262	0.823203	0.424734	0.873177	0.710285	0.0419002	0.559771	7.78074e-09
ZDHHC22	2.60887e-06	9.50387e-09	0.0903572	0.0206868	0.0286748	0.698468	0.129645	0.338284	0.794659	0.503753	0.463508	0.97491	0.87404	0.387348	0.563125	7.78179e-09
ZNF630	3.68441e-13	0.000392703	0.421692	0.195568	0.706836	0.918615	0.859081	0.311146	0.388922	0.287421	0.993544	0.559215	0.183287	0.83716	0.0737873	7.98844e-09
ASCC3	8.54843e-05	1.82975e-07	0.0374784	0.00227362	0.123325	0.781342	0.185511	0.0464035	0.938436	0.201193	0.498405	0.792504	0.684542	0.0419255	0.616628	7.99968e-09
CREB3L1	1.56876e-05	5.23339e-06	0.00322004	0.37032	0.00371367	0.36071	0.325904	0.958775	0.100955	0.0520724	0.285235	0.68484	0.622013	0.0937771	0.600767	8.06031e-09
RARA	5.61543e-08	0.000106154	0.0464816	0.00863655	0.0366911	0.420969	0.923506	0.061857	0.99911	0.0689297	0.76708	0.513962	0.799223	0.17842	0.18219	8.11811e-09
PSRC1	3.41381e-05	3.15027e-11	0.125657	0.11405	0.862919	0.0464714	0.10251	0.641018	0.740857	0.697427	0.188945	0.968922	0.812012	0.572814	0.840147	8.16431e-09
DNER	8.97764e-06	4.2588e-07	0.0450991	0.0284382	0.0404737	0.89874	0.0124238	0.185282	0.245087	0.370995	0.595509	0.947533	0.219982	0.652403	0.514111	8.36998e-09
CCNA2	2.04726e-08	6.67429e-09	0.24366	0.0268909	0.26844	0.735871	0.635814	0.289291	0.556308	0.794851	0.938273	0.881851	0.640709	0.332503	0.616345	8.40242e-09
LPAR2	0.000819008	6.29831e-07	0.0036344	0.703626	0.0585326	0.0258184	0.0466783	0.900753	0.188164	0.0280332	0.0695695	0.889363	0.564112	0.230511	0.444555	8.47386e-09
CASP7	6.05495e-05	3.13288e-06	0.0122876	0.263535	0.0031761	0.129292	0.0780204	0.871198	0.479616	0.0704504	0.413269	0.190343	0.408015	0.120206	0.709743	8.49305e-09
WNK3	4.62567e-06	1.85929e-09	0.0891005	0.036402	0.280307	0.15583	0.0860073	0.874962	0.342399	0.548361	0.261113	0.879705	0.995029	0.528107	0.765735	8.51184e-09
HRH2	4.95524e-08	7.72644e-08	0.284473	0.0667769	0.681883	0.145333	0.337201	0.246656	0.43492	0.394617	0.427641	0.26924	0.707916	0.520322	0.369702	8.59551e-09
MST1R	6.59795e-07	5.88002e-06	0.23301	0.183071	0.00803104	0.664073	0.0412471	0.953476	0.123892	0.0858217	0.349718	0.771184	0.517111	0.107987	0.291878	8.63057e-09
E2F7	4.26349e-07	4.97788e-09	0.181355	0.00991635	0.354921	0.807791	0.347795	0.163417	0.648328	0.884344	0.643643	0.857563	0.943114	0.0937758	0.93266	8.63483e-09
STMN4	8.87538e-07	7.44346e-06	0.150165	0.0301388	0.0648725	0.21238	0.0116084	0.294503	0.413147	0.244785	0.115747	0.964042	0.997598	0.171456	0.611189	8.77866e-09
PAK6	1.76406e-05	7.22114e-11	0.173517	0.0797596	0.683407	0.157915	0.158458	0.296978	0.421727	0.654787	0.375837	0.984867	0.40966	0.475306	0.936351	8.80553e-09
IL15	0.0743422	2.11717e-11	0.161089	0.321159	0.71484	0.0094604	0.0321166	0.650175	0.377014	0.333494	0.0187861	0.70684	0.673696	0.244628	0.543203	8.99405e-09
PRKCH	2.19649e-05	1.04893e-10	0.0332416	0.112612	0.632263	0.812917	0.337947	0.743585	0.925455	0.177587	0.631514	0.240589	0.785103	0.270857	0.290644	8.99597e-09
ATP8B1	0.000365987	4.793e-07	0.0138514	0.196284	0.00227245	0.500077	0.0770344	0.643263	0.630012	0.0240895	0.482269	0.530989	0.21665	0.123023	0.619288	9.00965e-09
EDNRB	7.83122e-13	0.000113562	0.410374	0.0852226	0.829489	0.517295	0.78553	0.380749	0.756771	0.357966	0.707918	0.265925	0.948457	0.497812	0.18724	9.29502e-09
GRTP1	8.02027e-05	5.18679e-10	0.0427374	0.147134	0.0699128	0.368492	0.0147983	0.782762	0.849612	0.258139	0.651831	0.797024	0.590664	0.833728	0.412494	9.32137e-09
BCAM	2.47938e-08	0.000161745	0.105438	0.00663752	0.00961998	0.854313	0.312502	0.461395	0.469067	0.186808	0.519768	0.795846	0.665263	0.0911499	0.260092	9.66726e-09
ORC2	0.0093289	1.64698e-09	0.0141017	0.00311329	0.216409	0.936303	0.198341	0.122859	0.842565	0.284775	0.191827	0.848834	0.547836	0.0442391	0.619171	9.85335e-09
EPHA6	0.000554097	6.70994e-09	0.0658519	0.0122253	0.0572588	0.0531252	0.0515936	0.5625	0.593358	0.401515	0.0948187	0.919822	0.977494	0.398062	0.934559	1.00111e-08
OPCML	1.91537e-05	6.43109e-10	0.742862	0.169094	0.990645	0.0520026	0.00531555	0.219918	0.762974	0.79612	0.154064	0.953402	0.56601	0.716302	0.593463	1.00247e-08
ZNF341	0.0169134	4.89372e-12	0.0545846	0.0374073	0.522668	0.332527	0.11303	0.534024	0.440812	0.820727	0.227414	0.873378	0.282199	0.0584672	0.955352	1.00528e-08
RAB40B	0.0182672	5.54501e-06	0.00167731	0.876617	0.35944	0.301001	0.147391	0.97089	0.544165	6.0642e-05	0.252453	0.760631	0.0435778	0.0357808	0.0897095	1.01799e-08
ZNF446	8.51838e-06	0.000366456	0.657361	0.00536691	0.0148649	0.374846	0.791926	0.0878567	0.414281	0.0107606	0.817663	0.487595	0.0491209	0.635317	0.00868538	1.02259e-08
SORBS1	0.000228082	1.27327e-08	0.252522	0.0248218	0.11096	0.0603165	0.0848754	0.93802	0.140033	0.691917	0.0559314	0.910129	0.542345	0.138764	0.573207	1.02504e-08
GRM6	6.98085e-06	6.72966e-07	0.0236297	0.06757	0.231863	0.00889913	0.0655367	0.890635	0.30587	0.410552	0.043086	0.91454	0.908211	0.739636	0.688882	1.02677e-08
FANCF	0.296603	4.48274e-11	0.00759505	0.004846	0.0323486	0.700807	0.0966593	0.769945	0.219361	0.333514	0.883519	0.831237	0.23464	0.283711	0.711869	1.03868e-08
BAZ1A	0.0113385	1.79716e-05	6.70286e-05	0.0460091	0.0016796	0.052699	0.858713	0.438994	0.584276	0.042558	0.0635523	0.516123	0.694263	0.475754	0.377658	1.0496e-08
PTPRZ1	1.68485e-09	6.76065e-05	0.771395	0.0348219	0.175981	0.453063	0.838104	0.0234072	0.438993	0.294723	0.546115	0.213783	0.453373	0.527696	0.123351	1.04963e-08
MED12L	2.96236e-09	2.03724e-06	0.0575344	0.179164	0.103683	0.324799	0.0997529	0.559999	0.996602	0.360435	0.52709	0.834747	0.495383	0.568236	0.414718	1.05871e-08
TAB1	6.56081e-07	2.38694e-06	0.101761	0.00842616	0.0287696	0.30711	0.664353	0.552748	0.444394	0.344187	0.520481	0.634667	0.344673	0.0928954	0.31178	1.07206e-08
ZNF557	0.00013486	1.98993e-07	0.0047778	0.264257	0.36819	0.00947619	0.297509	0.947391	0.198487	0.224	0.0666825	0.8575	0.323134	0.504972	0.159307	1.07364e-08
RET	1.49956e-08	1.46666e-07	0.0790616	0.0705236	0.108739	0.466447	0.204891	0.825481	0.52345	0.801276	0.430266	0.92034	0.990081	0.175171	0.752303	1.10053e-08
TBC1D22B	0.00340829	4.89385e-08	0.00740217	0.030273	0.540778	0.0471155	0.0560033	0.157462	0.715931	0.319998	0.0298072	0.964646	0.179802	0.839756	0.273616	1.10252e-08
RPS6KA1	3.12773e-07	1.47795e-06	0.0258301	0.241148	0.0359549	0.200908	0.0689279	0.393197	0.629573	0.1165	0.564874	0.951919	0.687105	0.744678	0.201491	1.10479e-08
TAF2	0.00232212	3.49064e-07	0.00726812	0.00122314	0.195695	0.187756	0.765755	0.0144732	0.996945	0.300853	0.184152	0.976117	0.556133	0.0457596	0.570247	1.10609e-08
FANCA	5.41917e-06	2.77443e-09	0.0311611	0.0193256	0.251583	0.713148	0.167725	0.336319	0.752479	0.789561	0.514949	0.97636	0.708484	0.121551	0.976258	1.10796e-08
TCL1A	1.23333e-05	1.32317e-08	0.0628398	0.224879	0.862127	0.17838	0.0519723	0.0707104	0.578377	0.269409	0.209189	0.672051	0.930544	0.353889	0.244874	1.10831e-08
HTR2B	0.00993012	1.17878e-13	0.166977	0.0617904	0.596179	0.45553	0.256712	0.200773	0.537856	0.884179	0.353783	0.846332	0.783059	0.128146	0.985313	1.13485e-08
ZNF69	0.580503	1.72817e-11	0.0266627	0.0558476	0.240952	0.232234	0.0307155	0.972969	0.957662	0.32653	0.309524	0.300433	0.416467	0.0315657	0.25782	1.16265e-08
ARFGEF1	0.000201852	1.19771e-06	0.0149943	0.0239925	0.0747205	0.742835	0.240959	0.0186581	0.868537	0.0992352	0.257941	0.800044	0.416742	0.0396009	0.390957	1.17226e-08
GRIA1	5.36798e-09	5.80727e-07	0.0460691	0.0344957	0.109723	0.60935	0.568643	0.472929	0.701607	0.3146	0.464504	0.982377	0.804439	0.467034	0.749672	1.1844e-08
UNC5CL	0.0854296	1.37994e-07	0.0367061	0.723785	0.110424	0.00239152	0.0020369	0.770798	0.774285	0.146509	0.0181798	0.300832	0.120991	0.456534	0.579687	1.20197e-08
TRIM23	0.0049875	1.01548e-10	0.0255207	0.214298	0.330236	0.022328	0.0240258	0.619391	0.45286	0.617787	0.105237	0.96061	0.806969	0.471878	0.811937	1.22778e-08
ARHGAP18	1.1702e-05	8.94114e-07	0.11016	0.0716731	0.00823899	0.113138	0.131154	0.441227	0.514439	0.110445	0.415524	0.204253	0.755577	0.444241	0.368917	1.22883e-08
DGKI	0.000303589	9.58055e-08	0.000291999	0.0968938	0.0110122	0.108613	0.84999	0.945756	0.688095	0.128676	0.215768	0.711905	0.823121	0.619318	0.486449	1.23135e-08
SUZ12	0.000229042	3.62071e-09	0.0994477	0.00169844	0.363421	0.844895	0.310101	0.0660183	0.657732	0.40245	0.320605	0.837832	0.988452	0.107652	0.414895	1.26258e-08
DAPK3	0.00171958	9.7063e-07	0.0567149	0.00120478	0.0114433	0.837984	0.530944	0.0410922	0.978573	0.100771	0.555647	0.521438	0.567747	0.0502563	0.14344	1.27106e-08
RSU1	0.00343259	1.11899e-08	0.0434018	0.00900677	0.10245	0.27278	0.0241261	0.504977	0.542187	0.19045	0.116522	0.448117	0.323386	0.320238	0.985394	1.27841e-08
MS4A7	0.0979672	4.86364e-11	0.0120191	0.105715	0.221947	0.796868	0.372715	0.639542	0.582716	0.132438	0.0809861	0.237829	0.306732	0.0282392	0.857304	1.27985e-08
KLF2	0.000749464	2.05276e-09	0.47921	0.00428179	0.427153	0.897374	0.188918	0.0497888	0.640104	0.146265	0.689479	0.920517	0.618362	0.2618	0.0258207	1.28301e-08
XPR1	0.00174295	1.84397e-09	0.817933	0.0460311	0.498133	0.0231052	0.0236467	0.17046	0.944494	0.263655	0.0686604	0.805554	0.987393	0.708008	0.0550444	1.33058e-08
LIFR	3.21983e-06	1.5581e-10	0.390101	0.0895041	0.440265	0.811532	0.119786	0.693383	0.546121	0.257755	0.702692	0.739936	0.853492	0.912842	0.102214	1.34788e-08
ZNF831	0.000601095	7.28838e-10	0.0289064	0.075273	0.605262	0.524017	0.324169	0.470253	0.880118	0.074568	0.236999	0.362231	0.640332	0.115806	0.157375	1.34807e-08
RASSF7	0.000305611	6.07631e-10	0.0471675	0.361832	0.208038	0.0946232	0.0816632	0.899975	0.36406	0.204353	0.233257	0.812333	0.376508	0.279423	0.460341	1.37959e-08
FAM126A	0.000298638	8.59121e-08	0.00473139	0.296373	0.299959	0.0410623	0.140007	0.796901	0.545408	0.0205937	0.187135	0.776159	0.175936	0.263363	0.870881	1.41837e-08
GRIP1	1.61738e-05	6.91568e-08	0.0415719	0.117081	0.10187	0.0822483	0.0670887	0.2455	0.436015	0.498938	0.240497	0.835056	0.523835	0.489557	0.39075	1.42901e-08
ZNF415	3.35719e-10	5.3281e-06	0.287877	0.0773297	0.281584	0.762025	0.0885613	0.404415	0.276797	0.662306	0.822998	0.877231	0.633778	0.239497	0.537155	1.4331e-08
BCL10	7.54301e-06	3.15181e-06	0.0578512	0.0365177	0.000546807	0.819939	0.330435	0.935898	0.177063	0.116393	0.435911	0.64793	0.942327	0.169301	0.519232	1.45018e-08
DAP3	2.95259e-07	1.20829e-08	0.322765	0.00492174	0.258966	0.718324	0.736677	0.320056	0.904021	0.362779	0.938645	0.896584	0.390914	0.644262	0.195288	1.45524e-08
RASL11A	3.47398e-08	8.05192e-05	0.0336095	0.0318187	0.534693	0.324729	0.254212	0.390732	0.229183	0.414137	0.159504	0.441128	0.780087	0.0148682	0.848682	1.46049e-08
CACNB4	2.29366e-09	4.42129e-07	0.0920408	0.392138	0.518344	0.284231	0.0931498	0.556472	0.461589	0.382723	0.66637	0.718928	0.726915	0.589595	0.346328	1.49705e-08
DIRAS1	3.60272e-08	1.35702e-06	0.15076	0.029096	0.129856	0.812738	0.175744	0.250984	0.68274	0.521258	0.872707	0.274209	0.399268	0.316479	0.327171	1.49813e-08
IMPA1	2.51256e-08	0.000766937	0.0167062	0.0187377	0.0126666	0.348707	0.7979	0.182066	0.772175	0.0715368	0.442975	0.714621	0.968867	0.129168	0.416013	1.50078e-08
NPY5R	1.79127e-07	5.01358e-10	0.355219	0.0824282	0.0794955	0.766772	0.407325	0.745028	0.401653	0.752751	0.946551	0.781553	0.721652	0.83906	0.537711	1.50639e-08
FEZF1	0.000311387	2.86548e-09	0.30753	0.00245689	0.202958	0.365216	0.14706	0.505521	0.295237	0.306708	0.244303	0.999501	0.903644	0.161448	0.299678	1.5212e-08
AZI2	0.000100446	5.19344e-06	0.119646	0.59103	0.631459	0.0116666	0.000754048	0.0526712	0.394898	0.461451	0.0330713	0.513822	0.342204	0.977152	0.322286	1.52436e-08
GDNF	2.849e-11	2.79261e-05	0.180729	0.0312211	0.337525	0.953622	0.198189	0.524779	0.644181	0.658587	0.749228	0.791784	0.661386	0.410134	0.360845	1.55444e-08
GHSR	0.000215972	9.38383e-07	0.0313981	0.000931362	0.0323077	0.0938217	0.0497552	0.362899	0.555828	0.320166	0.279873	0.788386	0.879375	0.457421	0.723429	1.55565e-08
TCEAL4	3.68723e-07	7.1734e-07	0.387093	0.0224731	0.0596681	0.189515	0.0388632	0.441739	0.335606	0.654995	0.450667	0.754829	0.764909	0.24469	0.593636	1.55712e-08
CALCR	2.03422e-07	1.06301e-05	0.00115128	0.49652	0.0426913	0.628452	0.292748	0.470545	0.93262	0.0132499	0.945238	0.796991	0.515068	0.749247	0.227144	1.56209e-08
BARX2	0.0179122	8.86187e-09	0.00511287	0.296542	0.0112991	0.31863	0.0527992	0.897557	0.372886	0.0399529	0.0835921	0.561345	0.545077	0.387618	0.619914	1.57158e-08
GID4	0.0199904	9.77224e-10	0.183407	0.127834	0.213984	0.0062541	0.00866863	0.916309	0.421805	0.777105	0.017157	0.631451	0.719729	0.333867	0.911149	1.57921e-08
ZNF207	1.31368e-06	2.40287e-08	0.334454	0.00986296	0.103733	0.497437	0.697437	0.181928	0.523311	0.425215	0.794847	0.730464	0.55732	0.303431	0.254495	1.58074e-08
PCM1	0.000922371	5.81215e-05	0.00209662	0.580289	0.515512	0.000508555	0.0260321	0.812361	0.210034	0.139639	0.0028366	0.556435	0.513055	0.653061	0.682211	1.59131e-08
BMPR1B	0.000331088	1.6164e-08	0.026764	0.0214899	0.045008	0.0910313	0.0579199	0.82779	0.896926	0.472325	0.0968278	0.974299	0.479478	0.421118	0.78699	1.59536e-08
RASGEF1C	0.000124508	7.74923e-08	0.163422	0.0786374	0.0132363	0.0570396	0.0458547	0.217003	0.980013	0.406113	0.150487	0.598237	0.730165	0.198399	0.79474	1.59611e-08
TBC1D31	0.00155769	7.5094e-09	0.0214098	0.00184475	0.372951	0.945348	0.386745	0.0220673	0.896872	0.366837	0.257535	0.772557	0.918823	0.0881849	0.522745	1.59956e-08
CARD8	4.93761e-05	3.31417e-10	0.0198875	0.455505	0.735631	0.061498	0.122951	0.776468	0.514076	0.220932	0.201469	0.731347	0.760334	0.699342	0.709861	1.65512e-08
LPAR6	2.99435e-05	1.93122e-09	0.00691165	0.151196	0.727157	0.282885	0.266577	0.205567	0.951992	0.242627	0.42803	0.913342	0.411725	0.312308	0.517999	1.67048e-08
ZNF77	0.0738494	5.75094e-10	0.0148272	0.0192492	0.216461	0.697747	0.522271	0.0820255	0.88728	0.166339	0.151951	0.840399	0.730117	0.0299535	0.126815	1.6712e-08
FZD2	0.000559078	0.000212455	0.00884761	0.00307916	0.000154899	0.414634	0.576807	0.775875	0.729429	0.0201398	0.226916	0.639155	0.399941	0.288501	0.180072	1.6764e-08
FZD7	4.02504e-07	1.12691e-05	0.0881933	0.00396765	0.0450967	0.208303	0.326841	0.751286	0.64623	0.574132	0.336688	0.439994	0.779393	0.0822398	0.322424	1.68827e-08
FEZ2	0.0441892	8.04626e-12	0.0180913	0.152205	0.664198	0.145645	0.0163612	0.401234	0.915658	0.56251	0.276944	0.657269	0.288952	0.272178	0.913906	1.69725e-08
STAT5B	8.08424e-06	3.99325e-10	0.0649181	0.0526171	0.059053	0.304085	0.55225	0.952934	0.401438	0.475259	0.702488	0.664987	0.932924	0.656912	0.738141	1.70056e-08
NIN	0.000471768	2.97076e-09	0.00413418	0.367868	0.245744	0.0168542	0.124211	0.995763	0.509662	0.41215	0.1027	0.511757	0.797591	0.525549	0.862645	1.74561e-08
PALB2	2.21305e-05	4.90029e-07	0.112062	0.00896676	0.15091	0.669431	0.149374	0.234702	0.483311	0.196672	0.226697	0.762492	0.54824	0.0575507	0.218519	1.74932e-08
BAIAP2L1	3.65743e-05	8.96044e-08	0.076474	0.24834	0.111701	0.177915	0.020398	0.99214	0.327195	0.170371	0.278685	0.405141	0.340841	0.190192	0.429687	1.754e-08
GPSM2	2.57226e-05	3.29671e-06	0.0133241	0.00682718	0.525843	0.135415	0.481387	0.0292857	0.999625	0.33737	0.0394937	0.93482	0.633101	0.148464	0.484709	1.75516e-08
EVI2A	0.00336616	8.54267e-10	0.00530612	0.138577	0.513882	0.784253	0.298086	0.650713	0.500598	0.0610002	0.275737	0.23409	0.379215	0.075872	0.478164	1.78048e-08
HIVEP3	0.000372108	8.17835e-09	0.0114554	0.0351488	0.0430836	0.786727	0.681517	0.500323	0.777222	0.160303	0.400062	0.242504	0.723649	0.153115	0.236844	1.78332e-08
VGLL4	0.238189	4.25507e-07	0.00131512	0.00432273	0.0102452	0.138873	0.64129	0.496355	0.518533	0.118824	0.109987	0.81456	0.219228	0.105378	0.138849	1.81924e-08
ITGA8	3.72432e-08	6.30785e-08	0.239636	0.0209367	0.453928	0.978433	0.176116	0.746894	0.314338	0.72021	0.687744	0.911687	0.439192	0.344	0.315147	1.82864e-08
TLE4	4.32058e-05	1.34999e-11	0.628309	0.0785033	0.786476	0.129123	0.302507	0.508951	0.739066	0.463006	0.425722	0.970258	0.480294	0.892492	0.170881	1.82954e-08
ERV3-1	0.0137494	1.22109e-08	0.0212714	0.148033	0.270434	0.234182	0.113126	0.482525	0.0535449	0.227475	0.00462548	0.544345	0.598346	0.214894	0.658713	1.85455e-08
LIF	1.83535e-08	5.48168e-08	0.885429	0.30124	0.521535	0.699292	0.0104682	0.349889	0.461041	0.481767	0.9065	0.907203	0.797097	0.713624	0.129027	1.87072e-08
EDA	0.000108282	0.00799307	0.0011015	0.258819	0.0050459	0.782567	0.0497252	0.242463	0.654944	0.00114565	0.757695	0.262739	0.709836	0.239824	0.0161224	1.87358e-08
SP100	0.00129516	1.90497e-08	0.0224424	0.448013	0.639613	0.0228833	0.0697088	0.367627	0.450569	0.108853	0.0273842	0.778992	0.468128	0.567976	0.187992	1.88734e-08
CCDC88C	0.000209384	3.29046e-06	0.00897715	0.000779532	0.0681011	0.413283	0.0765763	0.10747	0.861342	0.197741	0.373298	0.796368	0.423178	0.304131	0.673292	1.89665e-08
CIT	0.00259921	1.53182e-10	0.216313	0.00759299	0.762154	0.397368	0.0387539	0.0537057	0.826015	0.823661	0.383207	0.665606	0.401844	0.194651	0.893961	1.92458e-08
SLC7A1	4.75982e-09	1.45234e-07	0.390818	0.0667215	0.285623	0.501424	0.36138	0.202298	0.579711	0.504635	0.585212	0.829209	0.958356	0.339764	0.578368	1.93652e-08
SEMA4C	7.34077e-06	3.68811e-06	0.061433	0.0180245	0.000573893	0.691354	0.640433	0.526139	0.823238	0.126657	0.784044	0.420519	0.579683	0.208439	0.30525	1.94632e-08
CHRNA3	0.0139305	2.21413e-05	0.0702836	0.0232082	0.023517	0.014238	0.0635855	0.737544	0.106555	0.295038	0.00610662	0.52865	0.428147	0.0321807	0.460721	1.94845e-08
TERT	0.0580741	5.91829e-12	0.0821834	0.0258775	0.663396	0.0640753	0.0957357	0.231152	0.697728	0.832877	0.0837078	0.914545	0.736111	0.232083	0.980593	1.95784e-08
OR51E2	3.27521e-05	5.86073e-06	0.000108783	0.196313	0.0168309	0.718771	0.626164	0.992613	0.331521	0.0228452	0.343806	0.926527	0.496504	0.428745	0.327036	1.97204e-08
SH3GL2	1.76394e-05	3.61001e-09	0.289483	0.0177913	0.0840159	0.870761	0.0573109	0.208003	0.560678	0.758481	0.783339	0.974263	0.547234	0.125759	0.814565	1.97929e-08
EZH1	2.38035e-05	1.05569e-09	0.150499	0.160283	0.174229	0.0471092	0.213286	0.985702	0.244377	0.590703	0.179043	0.801523	0.66471	0.509183	0.710662	1.98152e-08
ZNF418	2.87791e-08	1.96518e-06	0.120501	0.136848	0.100063	0.369258	0.152632	0.394331	0.481567	0.408369	0.78537	0.851841	0.686678	0.0577275	0.484772	1.99004e-08
CLEC2D	0.00223432	1.62518e-08	0.00416372	0.116445	0.565283	0.0981379	0.227751	0.932219	0.517528	0.0172151	0.0813569	0.613356	0.787548	0.206744	0.350971	1.99663e-08
MARK2	0.000375349	1.25296e-09	0.0774709	0.312212	0.352984	0.0582155	0.017165	0.409326	0.341163	0.347046	0.204205	0.881933	0.25454	0.78407	0.761537	2.01122e-08
BAG4	5.04035e-11	0.00168652	0.0105647	0.0529736	0.46154	0.13746	0.409632	0.217173	0.998396	0.525127	0.486045	0.815612	0.543501	0.266329	0.666991	2.02868e-08
ZNF319	7.27699e-07	1.35147e-05	0.104271	0.00371711	0.00596818	0.334216	0.706531	0.372129	0.644507	0.359741	0.404645	0.514647	0.643915	0.205662	0.422531	2.03215e-08
CDS1	0.000102955	2.56429e-07	0.112632	0.063972	0.0029204	0.424029	0.0620264	0.743567	0.303126	0.342288	0.193628	0.39464	0.731684	0.0991102	0.865561	2.03366e-08
APPL2	0.0043664	5.19482e-08	0.210742	0.149987	0.00274423	0.257159	0.016211	0.859386	0.32059	0.527116	0.344742	0.234953	0.302118	0.0187294	0.990701	2.03423e-08
CENPI	0.00037006	1.82691e-10	0.402421	0.0162909	0.441115	0.513453	0.0807966	0.0791323	0.874759	0.89152	0.368829	0.900058	0.629118	0.0668409	0.784483	2.05355e-08
SCMH1	0.00101781	9.74568e-09	0.191164	0.0465075	0.0747115	0.0323373	0.0712439	0.951585	0.256468	0.629112	0.0558824	0.649333	0.480074	0.184105	0.736198	2.05918e-08
GPBP1L1	0.00133724	0.0194204	0.00107555	0.0237552	0.00206402	0.0193305	0.686037	0.213623	0.517004	0.0269653	0.0342651	0.994691	0.111885	0.0644115	0.414372	2.05988e-08
SPSB1	0.0173909	9.25317e-06	0.00133561	0.00195638	0.00709501	0.549986	0.937115	0.0436941	0.711549	0.0263821	0.436684	0.896099	0.630452	0.129005	0.137306	2.06148e-08
ZFP69B	0.000601272	2.97862e-08	0.0245464	0.00221555	0.373087	0.776561	0.186255	0.0394007	0.992363	0.319869	0.677519	0.995786	0.398901	0.0555529	0.563861	2.06949e-08
OR6N1	0.12549	0.000945156	0.00912622	0.0913871	0.00679975	0.397613	0.590113	0.0133984	0.671517	0.00841164	0.713247	0.0795325	0.62373	0.00106356	0.0126046	2.10219e-08
RNF2	0.00140028	3.43526e-08	0.315785	0.00309033	0.165638	0.924533	0.903256	0.04957	0.496681	0.29087	0.228746	0.608282	0.324447	0.0463438	0.0584913	2.10873e-08
GRPR	1.29158e-06	1.15918e-06	0.0116418	0.496141	0.0794755	0.0514156	0.212719	0.882472	0.351551	0.227633	0.0861294	0.839939	0.896922	0.234163	0.705913	2.10953e-08
TULP3	0.00355224	1.95455e-07	0.0328478	0.234705	0.0815181	0.0200737	0.0104304	0.840086	0.48134	0.056575	0.0704603	0.936081	0.526688	0.111915	0.703074	2.11464e-08
PAK3	6.65661e-10	5.33028e-07	0.267459	0.141414	0.35621	0.84174	0.457658	0.213858	0.516202	0.440472	0.973889	0.635358	0.677057	0.774281	0.196944	2.11661e-08
ATRX	0.000520557	0.000965853	0.000165419	0.849886	0.240238	0.000484139	0.5552	0.902395	0.10029	0.201577	0.00342305	0.852651	0.348679	0.580248	0.116774	2.1222e-08
AMHR2	4.79314e-11	0.0747981	0.0666487	0.315392	0.202825	0.0159638	0.61989	0.16681	0.923794	0.315065	0.0859035	0.111564	0.982833	0.562085	0.148631	2.1319e-08
ADCY1	9.96037e-11	8.5806e-06	0.340825	0.017507	0.381301	0.674021	0.558397	0.198366	0.894479	0.675291	0.580748	0.832488	0.833692	0.220391	0.743402	2.135e-08
ZNF655	0.00032024	1.15934e-11	0.327964	0.0832219	0.267914	0.501071	0.427991	0.281305	0.22045	0.33712	0.39536	0.956094	0.810863	0.59795	0.259958	2.13716e-08
AGAP11	0.000554473	1.40917e-08	0.0451447	0.0722494	0.677216	0.00457678	0.0470562	0.456894	0.796159	0.702195	0.0283562	0.85151	0.447912	0.614148	0.932374	2.15815e-08
TLR10	1.02676e-05	2.87831e-09	0.0708066	0.316517	0.919179	0.198515	0.104784	0.246314	0.97852	0.152478	0.337278	0.815771	0.77929	0.434874	0.136255	2.16678e-08
PRMT5	1.26465e-08	3.91738e-08	0.373608	0.0524163	0.475596	0.588231	0.951638	0.19462	0.535131	0.496529	0.887168	0.924085	0.324389	0.673038	0.248171	2.17197e-08
IL4R	0.000104747	0.00479821	0.00548149	0.0112545	0.00226267	0.0148153	0.150236	0.104955	0.309437	0.361871	0.0703143	0.774825	0.706269	0.0921492	0.912807	2.17374e-08
HES6	2.47602e-05	2.56232e-10	0.0185175	0.278391	0.520843	0.488265	0.27423	0.489269	0.700292	0.097879	0.878186	0.761442	0.701637	0.680913	0.244536	2.18303e-08
CALM1	0.13602	3.67677e-09	0.636285	0.0190196	0.559252	0.01429	0.00259353	0.587539	0.276026	0.732094	0.0248843	0.168419	0.640253	0.276623	0.54116	2.18482e-08
IQSEC1	2.25337e-07	8.53081e-09	0.265166	0.00596646	0.0655195	0.926936	0.935605	0.930597	0.468119	0.678169	0.892119	0.7053	0.807883	0.354187	0.653071	2.19008e-08
ZC3H6	9.78985e-06	1.83518e-08	0.092938	0.3982	0.498579	0.00885811	0.160748	0.880869	0.190546	0.756401	0.0642283	0.816034	0.523712	0.729024	0.503169	2.19813e-08
JUN	7.30543e-08	0.00151221	0.636677	0.00195593	0.109734	0.920529	0.509067	0.0432005	0.469502	0.148274	0.972413	0.550156	0.209124	0.135623	0.0188044	2.20743e-08
BHLHE41	0.00280466	2.39016e-10	0.0362477	0.0379751	0.452191	0.0377319	0.393996	0.3328	0.834517	0.599443	0.114846	0.975002	0.91091	0.148842	0.395617	2.24138e-08
FOXD4L6	0.0635327	3.90574e-06	0.000355009	0.00405198	0.00286443	0.98499	0.0867347	0.832769	0.567413	0.0837041	0.436111	0.511574	0.65067	0.0194094	0.640924	2.25072e-08
SNAI2	0.451618	5.89244e-07	8.28932e-06	0.145015	0.0367496	0.682151	0.843191	0.760419	0.498991	0.0115418	0.383093	0.992505	0.032178	0.159335	0.10811	2.25117e-08
LEPR	3.21165e-05	4.3645e-11	0.168246	0.185485	0.66837	0.112762	0.122471	0.384141	0.574565	0.783098	0.29732	0.996255	0.942867	0.34467	0.933444	2.25876e-08
LPP	0.000428976	9.0321e-09	0.0238823	0.255667	0.439158	0.0112286	0.142523	0.939745	0.203727	0.319956	0.056295	0.943787	0.428464	0.570341	0.479066	2.27511e-08
BRIP1	3.90164e-07	1.98933e-08	0.0673992	0.0218089	0.384172	0.899344	0.349098	0.124941	0.924695	0.785714	0.69368	0.895274	0.660714	0.126538	0.9789	2.27866e-08
CHUK	3.24901e-07	5.00459e-05	0.0189547	0.0113078	0.0785032	0.640565	0.486302	0.0496585	0.776033	0.0798078	0.642764	0.759955	0.644826	0.140896	0.54713	2.28261e-08
KCNIP3	7.33231e-07	1.18791e-05	0.103327	0.0115053	0.0116729	0.629164	0.143885	0.65256	0.716006	0.45963	0.215092	0.694786	0.776885	0.0359659	0.651081	2.28869e-08
ZNF568	1.1912e-07	2.3485e-07	0.269417	0.135421	0.204286	0.459345	0.0382714	0.471756	0.259456	0.490245	0.31328	0.982632	0.924109	0.225896	0.460831	2.32035e-08
SOCS2	0.00287706	5.19247e-10	0.413642	0.0487148	0.490295	0.420124	0.112924	0.705592	0.190266	0.121421	0.0327688	0.246901	0.745468	0.326212	0.29095	2.32544e-08
LHX6	5.58086e-08	5.83916e-08	0.172166	0.0119512	0.221575	0.850794	0.454297	0.948291	0.596902	0.609631	0.754335	0.846093	0.817788	0.0796494	0.79873	2.33697e-08
ZFP2	0.000565869	4.48368e-11	0.426535	0.0375407	0.496831	0.110655	0.0560398	0.698739	0.350674	0.938469	0.131342	0.783576	0.828546	0.324546	0.832312	2.34947e-08
FGF1	0.00181279	2.04285e-07	0.00387211	0.00420447	0.0115226	0.153861	0.341231	0.913813	0.69847	0.225237	0.13605	0.802863	0.678551	0.230066	0.77978	2.43466e-08
NAA15	3.18214e-08	6.22833e-07	0.093484	0.0285399	0.277121	0.707517	0.623364	0.0507517	0.82291	0.394686	0.674638	0.965981	0.67047	0.322614	0.465309	2.43849e-08
DPF3	0.0051871	1.12673e-11	0.168272	0.0431915	0.856042	0.30542	0.0858804	0.688914	0.45854	0.279917	0.0984039	0.414666	0.789937	0.323017	0.803803	2.45588e-08
GRIA2	7.53028e-05	1.94539e-09	0.119115	0.00666419	0.0761873	0.751435	0.101197	0.463096	0.628163	0.551707	0.531125	0.871609	0.676184	0.292702	0.7197	2.47351e-08
RBM39	0.473274	1.11074e-08	0.00406266	0.00220714	0.0607739	0.409315	0.46844	0.0864003	0.668197	0.182768	0.0949253	0.710665	0.409667	0.136608	0.33001	2.49578e-08
TOPORS	0.000162168	1.2181e-05	0.00514904	0.0260254	0.0687744	0.349163	0.741607	0.360882	0.754635	0.0385485	0.312904	0.17924	0.798364	0.0575274	0.0580039	2.53794e-08
CCAR1	0.0510417	2.95851e-06	0.000221173	0.0042285	0.00780102	0.0420976	0.817173	0.242004	0.72364	0.104428	0.0571032	0.808794	0.787113	0.320517	0.920034	2.54663e-08
OR8B8	0.0447017	3.66688e-11	0.571689	0.201739	0.313582	0.0165947	0.075405	0.437729	0.236802	0.814998	0.0752375	0.133279	0.591719	0.631488	0.32958	2.62096e-08
PRDM12	0.000159602	5.52528e-12	0.554608	0.0304401	0.801359	0.245603	0.24456	0.238401	0.799619	0.498265	0.66196	0.907768	0.557383	0.932112	0.36695	2.63499e-08
RASL11B	2.22973e-06	1.74236e-06	0.454391	0.00272352	0.0685465	0.979142	0.0279981	0.532604	0.237435	0.426192	0.494058	0.917407	0.652058	0.205764	0.265033	2.64701e-08
LTA	0.00248041	5.3253e-08	0.114321	0.186538	0.500296	0.50359	0.122676	0.360059	0.564937	0.099425	0.0312151	0.594414	0.184324	0.05301	0.024916	2.67212e-08
H2AC6	0.000181939	5.41411e-07	0.637046	0.51424	0.617613	0.000398605	0.397733	0.728871	0.2459	0.68324	0.00157294	0.0517973	0.833205	0.83261	0.365371	2.68084e-08
SMARCD1	0.00483287	9.90388e-10	0.73608	0.0236719	0.642147	0.0183236	0.0162517	0.763523	0.230133	0.856152	0.0727799	0.666379	0.37591	0.489147	0.381318	2.72052e-08
PRDM10	0.000159941	2.09121e-06	0.0226986	0.00625223	0.129172	0.799241	0.105768	0.0797717	0.630124	0.109798	0.315316	0.888915	0.490006	0.0321569	0.652979	2.742e-08
BID	4.93484e-05	6.51795e-11	0.18368	0.109629	0.325559	0.0930708	0.187281	0.932761	0.536426	0.556393	0.370627	0.87946	0.588547	0.818593	0.516131	2.7522e-08
IRAK3	1.69621e-09	1.31669e-05	0.077259	0.147282	0.492231	0.314969	0.513465	0.603308	0.688336	0.11996	0.751616	0.12085	0.815781	0.711215	0.156179	2.75264e-08
HDGF	0.00113804	2.29439e-11	0.0688412	0.191787	0.810342	0.0263191	0.103494	0.734149	0.435318	0.637549	0.121486	0.975221	0.848295	0.651002	0.822284	2.76341e-08
FOXE3	0.00759854	2.37544e-12	0.176571	0.0327107	0.812179	0.199506	0.0859819	0.798234	0.765045	0.578494	0.300094	0.513894	0.380598	0.285878	0.968905	2.76361e-08
BCL2L1	0.0043297	3.85494e-09	0.161084	0.754898	0.250125	0.00385578	0.031108	0.875972	0.0687867	0.829655	0.0115045	0.689493	0.889684	0.554673	0.715729	2.80704e-08
AIMP1	2.38893e-08	0.000109947	0.0887018	0.0074932	0.0173158	0.497291	0.385698	0.247465	0.94587	0.212799	0.911078	0.441688	0.512819	0.625788	0.232319	2.83859e-08
RABIF	0.0126414	1.0384e-08	0.0917215	0.0103042	0.0410282	0.203054	0.403452	0.815517	0.0500098	0.314256	0.277568	0.506189	0.217474	0.192719	0.275728	2.84156e-08
FGFBP1	4.58949e-06	1.37353e-05	0.613214	0.301183	0.00810207	0.978554	0.762769	0.821803	0.00732753	0.146416	0.0275641	0.810659	0.228709	0.41078	0.0668344	2.84903e-08
FH	5.61695e-08	1.43844e-06	0.00989956	0.0464974	0.190576	0.474168	0.837082	0.36399	0.949832	0.176411	0.857893	0.823707	0.565255	0.93736	0.136447	2.86193e-08
ARHGAP25	0.00333588	7.5788e-11	0.0360827	0.067278	0.434474	0.989337	0.292644	0.457563	0.921414	0.255404	0.193189	0.314581	0.669262	0.0745029	0.348433	2.86463e-08
TFB1M	5.0335e-07	3.41509e-07	0.0246211	0.00936335	0.0440022	0.425796	0.73995	0.825196	0.90967	0.377137	0.447524	0.831463	0.622555	0.317145	0.791635	2.92614e-08
TRERF1	6.54095e-06	3.07231e-09	0.293308	0.00421091	0.248403	0.801387	0.631124	0.416197	0.681973	0.635484	0.85824	0.292808	0.615363	0.286838	0.366383	2.94778e-08
PDE3B	2.80917e-08	0.000577509	0.00303518	0.534055	0.0672363	0.23291	0.25291	0.774327	0.466897	0.0334079	0.552459	0.402357	0.425629	0.475827	0.161967	2.95494e-08
GADD45G	1.92066e-06	0.000103884	0.00176226	0.00555868	0.25755	0.285463	0.666851	0.200567	0.301686	0.207878	0.534545	0.795278	0.492913	0.101614	0.359873	2.96938e-08
GPR22	1.08685e-06	3.14347e-06	0.0724653	0.043944	0.134874	0.0797196	0.0279981	0.815929	0.323322	0.287954	0.168212	0.887758	0.876334	0.454129	0.634949	3.00381e-08
PHOX2B	0.00119187	1.44712e-07	0.180916	0.0189179	0.0353383	0.0738727	0.0524574	0.741845	0.118059	0.470736	0.0319403	0.612878	0.784214	0.211171	0.870845	3.00847e-08
CARD14	0.304594	1.07446e-11	0.486634	0.0496956	0.468185	0.190755	0.00995887	0.501263	0.340382	0.951077	0.00592762	0.488542	0.385125	0.751257	0.989474	3.0223e-08
SENP2	0.0128111	1.65657e-09	0.0484706	0.0250096	0.411678	0.361529	0.198622	0.586944	0.388148	0.208096	0.177827	0.757688	0.10278	0.0374249	0.508603	3.02989e-08
ZNF800	2.28209e-08	0.0116198	0.00481546	0.0354148	0.0605153	0.28187	0.271064	0.131334	0.948525	0.0305942	0.382499	0.959171	0.39239	0.0970383	0.854433	3.03169e-08
BUB1B	8.66422e-06	6.40036e-09	0.113009	0.00841967	0.212994	0.957973	0.529435	0.124565	0.448751	0.82269	0.559421	0.925074	0.912638	0.0925579	0.83181	3.03609e-08
MEF2D	6.13035e-06	4.30619e-09	0.152834	0.00427267	0.0643568	0.495215	0.794408	0.520154	0.910812	0.685208	0.653786	0.686163	0.817698	0.247483	0.741439	3.0372e-08
PBX2	1.86094e-08	0.00430888	0.132097	0.0131321	0.00485355	0.339236	0.986998	0.450538	0.51914	0.0720655	0.585277	0.251734	0.681714	0.125888	0.202313	3.08425e-08
NECTIN2	0.00245409	7.17037e-10	0.132567	0.477196	0.587605	0.00523987	0.0230153	0.867805	0.467384	0.72227	0.0339032	0.609121	0.841251	0.349649	0.695129	3.08671e-08
CEBPZ	0.000145113	8.05041e-07	0.0119909	0.00207722	0.0558055	0.397101	0.99007	0.0680797	0.90012	0.131754	0.333376	0.752437	0.957853	0.14952	0.529931	3.09904e-08
NODAL	1.00194e-08	3.30511e-05	0.0130509	0.220894	0.511038	0.0227213	0.566871	0.69839	0.571096	0.380605	0.139969	0.672225	0.656921	0.936982	0.177664	3.09947e-08
TFDP2	0.000666147	2.75634e-07	0.230465	0.136794	0.110395	0.00526589	0.173999	0.972363	0.0374645	0.68166	0.016408	0.684008	0.31593	0.396722	0.485101	3.12317e-08
HCAR2	2.18063e-06	2.85557e-07	0.775704	0.0714055	0.103891	0.210267	0.32972	0.87939	0.0516597	0.378044	0.178287	0.974816	0.160795	0.997225	0.0859969	3.19017e-08
TEK	0.000131159	4.72171e-10	0.106894	0.0247078	0.710155	0.408568	0.247127	0.887809	0.526398	0.529804	0.27226	0.7869	0.352449	0.110292	0.427136	3.21308e-08
SND1	8.11189e-05	3.58235e-07	0.00127809	0.667081	0.619736	0.00356177	0.151539	0.782825	0.51928	0.287816	0.024598	0.970735	0.862185	0.756743	0.692353	3.24139e-08
S100A1	2.05278e-14	0.000541416	0.685947	0.233548	0.908327	0.668844	0.335905	0.224125	0.880258	0.916924	0.94459	0.591234	0.923921	0.663042	0.481728	3.32257e-08
INPP5B	2.33715e-07	9.67553e-08	0.0695381	0.16502	0.557654	0.0710109	0.446259	0.839068	0.486923	0.361181	0.340159	0.780627	0.421749	0.791071	0.183536	3.35917e-08
CD22	5.02577e-06	1.76234e-08	0.14459	0.174977	0.977694	0.234783	0.0349975	0.342043	0.89416	0.310733	0.276822	0.679318	0.771962	0.287072	0.155463	3.37662e-08
TEF	1.04431e-05	1.38923e-08	0.1525	0.00482552	0.160157	0.818012	0.772202	0.420831	0.363368	0.551474	0.620027	0.758724	0.342031	0.168795	0.448751	3.38027e-08
BRD8	5.89742e-07	0.00614056	0.00788174	0.00435465	0.306314	0.0269313	0.519218	0.0444244	0.93183	0.190968	0.0957288	0.810888	0.912169	0.0984856	0.378675	3.38301e-08
FOXD3	1.85848e-05	5.6805e-06	0.0409292	0.00812258	0.0140442	0.275813	0.0420721	0.544481	0.579554	0.454993	0.195866	0.78685	0.948595	0.145612	0.643972	3.41386e-08
TMED4	0.00956996	1.99245e-09	0.0274307	0.446413	0.295131	0.0300423	0.0825477	0.621074	0.133764	0.420671	0.0369987	0.85368	0.227445	0.363744	0.725659	3.42817e-08
ZMIZ1	8.13454e-09	2.79207e-07	0.249257	0.0226339	0.234885	0.815266	0.60067	0.588015	0.878819	0.471051	0.955721	0.460829	0.520561	0.531156	0.260811	3.44302e-08
CREB3L4	0.272387	1.19638e-06	0.000376863	0.463915	0.1089	0.00251721	0.220903	0.439238	0.109205	0.0886772	0.0096573	0.284097	0.537078	0.551878	0.966159	3.47178e-08
MYF6	0.00224451	1.60638e-06	0.000449647	0.0130477	0.14586	0.392339	0.427248	0.384096	0.690242	0.0589453	0.0284524	0.460564	0.908709	0.588677	0.205334	3.49367e-08
TYROBP	0.184918	1.91802e-08	0.00237075	0.0638611	0.13481	0.595808	0.411713	0.203062	0.961552	0.0652282	0.0356563	0.584411	0.189109	0.0216317	0.612785	3.5316e-08
RALA	7.1221e-07	1.31996e-07	0.594565	0.0179167	0.0168243	0.916625	0.369243	0.978461	0.344999	0.411098	0.569453	0.478998	0.564938	0.345276	0.283131	3.55422e-08
JMY	0.000177024	3.05803e-09	0.0236321	0.207896	0.241693	0.0315982	0.152983	0.975159	0.328015	0.382038	0.13009	0.910096	0.771077	0.489634	0.710592	3.58353e-08
MCTP2	0.0158884	7.00554e-07	0.0947552	0.000402823	0.00493276	0.481742	0.0173745	0.291145	0.527286	0.488649	0.290058	0.933228	0.403239	0.0854056	0.98366	3.58463e-08
TAPT1	0.000671355	1.13987e-05	0.00132299	0.893116	0.156939	0.00210894	0.0809717	0.752033	0.156091	0.392256	0.0119424	0.697684	0.424488	0.645554	0.478547	3.61075e-08
FGF20	1.05494e-08	0.545239	0.0750034	0.387671	0.00664905	0.0235923	0.457915	0.467234	0.792844	0.00816952	0.0350761	0.961138	0.632587	0.593032	0.0269132	3.64892e-08
ASB16	3.15239e-08	1.8067e-05	0.753483	0.0157734	0.104553	0.603201	0.929104	0.750505	0.42082	0.147067	0.899552	0.287705	0.156651	0.782642	0.0212683	3.66079e-08
HCLS1	0.00270779	1.73875e-10	0.0476105	0.0555087	0.372627	0.807917	0.298884	0.487584	0.744613	0.286632	0.193207	0.336897	0.664571	0.0540992	0.456151	3.66181e-08
OR1L8	0.0322934	1.15127e-08	0.00526058	0.0044504	0.608387	0.347844	0.0264083	0.286041	0.773761	0.0355377	0.695678	0.568217	0.666377	0.283666	0.436008	3.66755e-08
RAB25	1.54562e-05	1.41398e-07	0.00553901	0.283874	0.130264	0.0739837	0.344642	0.992302	0.197632	0.108097	0.311918	0.692093	0.698103	0.846995	0.412726	3.72575e-08
ZNF229	6.21152e-08	3.10964e-07	0.256515	0.0547468	0.27145	0.915713	0.0523384	0.661115	0.435709	0.739283	0.587656	0.966738	0.736878	0.0627126	0.653399	3.7553e-08
SGPL1	0.000160836	1.12837e-07	0.238905	0.0248729	0.0602299	0.484167	0.00420014	0.746716	0.118834	0.627999	0.373861	0.67787	0.9777	0.0862361	0.820971	3.75953e-08
E2F2	3.9356e-05	3.50284e-10	0.144088	0.051994	0.528646	0.126995	0.124863	0.376078	0.736065	0.913463	0.319833	0.981222	0.637122	0.303155	0.978771	3.7751e-08
GRIK4	8.89561e-12	0.000117718	0.0280826	0.242708	0.266166	0.612455	0.839945	0.469168	0.959488	0.232313	0.902524	0.571315	0.952356	0.717948	0.360747	3.77722e-08
CSRNP3	5.41434e-08	9.31286e-08	0.0679354	0.19561	0.445925	0.212733	0.160515	0.525052	0.695103	0.427388	0.619549	0.905778	0.624977	0.424561	0.554062	3.80406e-08
URI1	0.000290301	5.88462e-08	0.173488	0.0031121	0.227071	0.277802	0.537444	0.16974	0.66964	0.280255	0.307355	0.547569	0.713632	0.0670612	0.163842	3.80706e-08
MCM6	8.27161e-07	6.77995e-09	0.300874	0.00847429	0.324805	0.579955	0.617864	0.14557	0.6687	0.825685	0.840402	0.735769	0.93768	0.230789	0.735364	3.81067e-08
CACNA1I	1.9973e-13	0.132111	0.159154	0.425036	0.151308	0.267564	0.789951	0.568137	0.629317	0.166811	0.465167	0.193946	0.948767	0.371654	0.121928	3.81941e-08
FOXO1	0.00734181	6.15587e-09	0.00278565	0.637842	0.202755	0.0202326	0.0364499	0.62405	0.773452	0.17532	0.107666	0.653015	0.511589	0.500653	0.722663	3.823e-08
PLCL2	0.000110583	3.067e-12	0.153836	0.0544375	0.847495	0.970291	0.285163	0.519139	0.993301	0.484232	0.530479	0.430794	0.975397	0.449661	0.800235	3.84655e-08
PRKD3	0.000948285	2.42365e-08	0.00198232	0.422582	0.352854	0.0903586	0.0741046	0.668821	0.541987	0.0331445	0.361354	0.777765	0.39243	0.739142	0.299437	3.84697e-08
PDPN	0.274074	6.69933e-05	4.95033e-06	0.0489564	0.0461591	0.995659	0.744486	0.824318	0.544756	0.00413398	0.407976	0.790982	0.0669627	0.112702	0.0194204	3.85236e-08
ZNF554	9.79403e-08	3.32822e-07	0.98847	0.0715172	0.120599	0.175425	0.193141	0.91015	0.0759849	0.743253	0.361875	0.751556	0.477271	0.678233	0.315618	3.8686e-08
CACNA1A	1.34061e-10	8.61435e-05	0.102488	0.124385	0.520835	0.431339	0.986643	0.21802	0.980325	0.17101	0.784383	0.631215	0.154947	0.955378	0.153946	3.87052e-08
ENG	8.14356e-05	6.57875e-08	0.200729	0.000716556	0.159666	0.38095	0.95477	0.42018	0.740916	0.248663	0.326646	0.797111	0.705401	0.116529	0.182208	3.88108e-08
PAX5	0.000132301	2.29796e-09	0.0576126	0.278413	0.858771	0.303628	0.0640617	0.160829	0.991188	0.240596	0.219503	0.651809	0.903273	0.308114	0.109346	3.89987e-08
FLRT1	1.03027e-05	5.73093e-08	0.139701	0.0575349	0.0527652	0.227106	0.11565	0.861181	0.269873	0.511764	0.147173	0.912655	0.717645	0.327712	0.554939	3.92202e-08
EDNRA	0.0178201	1.29239e-08	0.000165746	0.0918975	0.0517295	0.404107	0.675572	0.986323	0.800764	0.182508	0.242354	0.859083	0.128633	0.235371	0.304957	3.92494e-08
ARHGAP11B	0.0204206	1.13643e-05	0.000367678	0.00981439	0.233801	0.11458	0.255618	0.0955697	0.815277	0.139907	0.0808816	0.971703	0.175875	0.0187102	0.851306	3.93204e-08
RUSC1	0.000168642	1.21188e-09	0.035471	0.19515	0.709107	0.0259647	0.165145	0.934532	0.296878	0.363787	0.12581	0.913652	0.586746	0.616592	0.763121	3.93507e-08
PTPRC	0.00347434	6.43983e-11	0.034436	0.0886254	0.739769	0.445623	0.212789	0.731217	0.851472	0.0941871	0.224302	0.207718	0.880311	0.169154	0.707325	3.93632e-08
IL22	0.00167951	4.54027e-08	0.00805323	0.0216487	0.0414441	0.027489	0.392528	0.623246	0.853635	0.330759	0.0730051	0.99485	0.991251	0.403303	0.455412	3.94621e-08
ADH1A	1.32505e-05	1.49157e-10	0.146835	0.0365571	0.843377	0.295425	0.230933	0.60441	0.478455	0.645131	0.435375	0.623306	0.875396	0.708387	0.723499	3.9526e-08
DUSP9	0.153072	0.000124001	0.547322	0.0775087	0.00239507	0.140934	0.816728	0.281407	0.0203383	0.00601535	0.157994	0.161879	0.094344	0.658178	0.00115091	3.97335e-08
AHCTF1	0.00039782	1.41272e-07	0.0105886	0.0085255	0.218447	0.28739	0.413454	0.0403374	0.802358	0.233417	0.242315	0.981525	0.715833	0.154172	0.53998	3.99956e-08
ZNF16	0.00260249	1.09775e-09	0.00448863	0.207193	0.60358	0.979445	0.311635	0.499005	0.690959	0.0362142	0.313662	0.285179	0.31133	0.238343	0.349586	4.01582e-08
GPR20	1.26543e-08	7.34239e-07	0.30289	0.0500627	0.361586	0.35542	0.603238	0.727018	0.194727	0.690707	0.525301	0.925773	0.325934	0.292505	0.28715	4.02316e-08
SCGB1A1	0.0279935	1.04179e-05	0.00629312	0.746627	0.219413	0.000763328	0.678766	0.111874	0.103742	0.517801	0.00088715	0.281704	0.326095	0.399983	0.478247	4.09744e-08
ZNF333	2.98688e-05	9.63364e-09	0.033345	0.215777	0.133862	0.0576462	0.259506	0.980775	0.162736	0.418841	0.254188	0.637558	0.81516	0.64068	0.624306	4.1074e-08
ARL5B	0.00057498	1.62269e-07	0.0687748	0.00594214	0.0865044	0.771823	0.191552	0.118907	0.700556	0.18371	0.443704	0.563511	0.699445	0.024794	0.453655	4.11424e-08
GMNN	1.04941e-05	2.47276e-09	0.281279	0.0193768	0.0979249	0.227552	0.840423	0.594165	0.365989	0.671915	0.430043	0.798774	0.567894	0.380533	0.525468	4.19582e-08
SIX2	0.000489917	6.16348e-06	0.0355688	0.0761604	0.0215548	0.0224367	0.047129	0.946934	0.409496	0.426665	0.0115598	0.72534	0.73999	0.0943038	0.837746	4.20059e-08
PTPRT	2.06925e-13	8.23705e-05	0.647045	0.127768	0.90295	0.566184	0.399992	0.613744	0.796402	0.806587	0.876743	0.482646	0.828046	0.886268	0.440892	4.28484e-08
SRF	0.00867728	2.88211e-08	0.190471	0.00540217	0.0194765	0.269404	0.273265	0.611824	0.297657	0.399925	0.345286	0.407491	0.21129	0.0841356	0.233738	4.31513e-08
ZNF195	0.00847005	6.65184e-08	0.00458237	0.000763662	0.138681	0.272942	0.390386	0.155081	0.571674	0.516621	0.360756	0.935965	0.628189	0.0718327	0.790937	4.38622e-08
ALCAM	2.94027e-07	0.000256442	0.0157578	0.0412787	0.208802	0.553795	0.803868	0.0199124	0.790716	0.476603	0.708052	0.630853	0.524484	0.0142183	0.142957	4.42636e-08
TBC1D1	0.00690955	7.10332e-10	0.269073	0.0827768	0.0835425	0.168362	0.168656	0.846087	0.14342	0.525446	0.0281853	0.623308	0.3073	0.327956	0.557038	4.4295e-08
AHRR	0.0333472	3.97696e-07	0.00145366	0.722605	0.0644198	0.0110143	0.216421	0.994464	0.0549383	0.0279176	0.0447367	0.839936	0.304513	0.673804	0.648644	4.43141e-08
MSI2	0.0476008	2.38718e-08	0.434578	0.0507161	0.626649	0.01074	0.021216	0.0927374	0.233673	0.478726	0.0284575	0.611002	0.834304	0.109554	0.278112	4.44659e-08
RASD1	8.75133e-09	0.016718	0.0621567	0.0327416	0.112392	0.0346608	0.84561	0.319325	0.863346	0.0826223	0.139091	0.410057	0.543419	0.0770332	0.310374	4.47669e-08
BLM	0.000923557	1.26721e-09	0.0944523	0.00118589	0.13069	0.61228	0.829106	0.127417	0.456874	0.766807	0.648371	0.819465	0.898862	0.128445	0.708283	4.5357e-08
ARHGDIB	0.0197279	8.10926e-10	0.0312252	0.0387151	0.245503	0.492769	0.218569	0.335058	0.753062	0.349114	0.0794795	0.588376	0.375046	0.0242702	0.885556	4.55689e-08
GP1BB	5.41942e-05	9.85657e-05	0.0120812	0.00841282	0.00199354	0.883444	0.165648	0.871028	0.40199	0.100159	0.417718	0.461454	0.500811	0.0377969	0.84784	4.59512e-08
ADAP1	0.000237067	6.94578e-10	0.0703263	0.485079	0.300791	0.16826	0.0294355	0.446736	0.422964	0.174955	0.434379	0.852651	0.508512	0.640445	0.515803	4.60045e-08
ZNF765	0.000258856	8.72621e-05	0.000821053	0.00155708	0.183039	0.144183	0.710889	0.0366274	0.87358	0.113185	0.31719	0.920504	0.867435	0.0527023	0.669209	4.65929e-08
FOXD4L1	0.00246614	6.65319e-07	0.00269503	0.0667872	0.043925	0.211242	0.137618	0.369897	0.531844	0.130184	0.0560843	0.971346	0.53752	0.0835475	0.74261	4.66308e-08
RIPK2	1.75676e-09	7.50044e-07	0.224927	0.0282813	0.355862	0.953039	0.4613	0.540112	0.417902	0.769735	0.765807	0.881765	0.654653	0.28714	0.610191	4.68162e-08
DMRTA1	2.25347e-08	1.00109e-06	0.588176	0.0654742	0.664659	0.834871	0.115564	0.0317286	0.447453	0.478121	0.997193	0.328304	0.996545	0.846096	0.170256	4.70508e-08
TRIM25	0.000265519	2.48336e-07	0.0364088	0.0516717	0.0779176	0.435161	0.0254425	0.104956	0.815427	0.286016	0.495599	0.933314	0.138945	0.161002	0.663796	4.74581e-08
GNAI1	4.31147e-07	6.80078e-07	0.0944533	0.0246455	0.171476	0.425429	0.122731	0.29444	0.851456	0.574183	0.671205	0.629814	0.491131	0.222036	0.44475	4.75382e-08
RAP1GAP	0.0109903	1.89343e-06	0.0157146	0.79719	0.190041	0.000400115	0.353651	0.737995	0.108599	0.470111	0.000958541	0.093675	0.966765	0.802551	0.983177	4.76407e-08
CHEK2	7.39629e-07	7.03105e-08	0.312449	0.00831097	0.0181531	0.608139	0.710816	0.237469	0.602472	0.659988	0.950545	0.967367	0.462373	0.960584	0.443494	4.76994e-08
MXD4	0.00194422	1.10532e-06	0.0574393	0.0010506	0.0700997	0.270036	0.735607	0.0480301	0.897388	0.141543	0.186812	0.854861	0.508019	0.060921	0.33466	4.78816e-08
RCHY1	4.81345e-11	0.160285	0.0582691	0.0961838	0.0469139	0.147546	0.197622	0.169751	0.658273	0.152775	0.542331	0.60508	0.592374	0.410812	0.226648	4.7982e-08
MCF2	6.84404e-05	5.77325e-09	0.00992507	0.27256	0.444005	0.0598819	0.117567	0.934394	0.501343	0.259247	0.227219	0.706742	0.598419	0.64223	0.731361	4.8053e-08
FGFRL1	0.00760136	7.19117e-10	0.0395866	0.405475	0.263277	0.0327444	0.111155	0.628737	0.0535778	0.128675	0.142072	0.97606	0.896831	0.65916	0.620909	4.84841e-08
ADIPOR1	0.000473205	7.17854e-05	0.00172172	0.196792	0.218314	0.0122975	0.765205	0.7465	0.0487708	0.0149098	0.0790712	0.691269	0.31279	0.558697	0.151812	4.85975e-08
DOT1L	9.01603e-06	3.27879e-08	0.0796303	0.356182	0.389316	0.212018	0.0671623	0.0970994	0.553315	0.324168	0.481641	0.982872	0.247026	0.258576	0.762272	4.86845e-08
SRSF10	1.18013e-06	2.26231e-05	0.00639467	0.0146982	0.525453	0.118739	0.814716	0.0790485	0.716685	0.226143	0.290295	0.903746	0.582628	0.123523	0.608259	4.88825e-08
ZDHHC14	3.74308e-10	0.0838656	0.203505	0.00852561	0.747768	0.00886183	0.0899819	0.30171	0.841952	0.374804	0.0660774	0.497685	0.622152	0.953676	0.311801	4.89621e-08
CHAF1A	4.17132e-06	5.38075e-10	0.192317	0.0659614	0.385053	0.355343	0.246738	0.389966	0.542576	0.836374	0.731318	0.999947	0.862792	0.1991	0.886252	4.91925e-08
ZNF398	4.85086e-05	3.48917e-08	0.0502282	0.092222	0.673739	0.844586	0.114823	0.145718	0.902322	0.216841	0.269825	0.474725	0.665064	0.117045	0.130151	4.92211e-08
WDR77	3.71504e-05	3.20192e-09	0.0642668	0.220815	0.611002	0.0175054	0.191166	0.64247	0.448189	0.559319	0.088417	0.912712	0.714112	0.902991	0.665095	4.97398e-08
SOX8	1.62332e-07	1.25657e-07	0.167206	0.118055	0.448309	0.338782	0.286634	0.156985	0.591256	0.472444	0.587426	0.53738	0.881572	0.442546	0.20383	4.98415e-08
GPR39	0.00102935	3.44891e-08	0.185371	0.646768	0.0377758	0.0413619	0.0300844	0.889626	0.249814	0.189085	0.216233	0.223681	0.381332	0.255068	0.492103	5.01465e-08
BTLA	0.00175711	1.92248e-09	0.030263	0.142854	0.717663	0.610622	0.231291	0.455574	0.597253	0.0401053	0.458007	0.349769	0.519036	0.0794545	0.182517	5.01684e-08
CRTC3	1.08268e-06	2.87812e-07	0.0225736	0.021253	0.00861405	0.571022	0.987408	0.853505	0.599902	0.485863	0.675033	0.73103	0.816655	0.334828	0.80076	5.02417e-08
ACSL6	1.49246e-07	3.83008e-06	0.130789	0.148727	0.383524	0.240288	0.0495127	0.880264	0.0823032	0.623761	0.209068	0.558743	0.472705	0.17457	0.90292	5.10304e-08
ZNF790	1.45544e-11	0.000977114	0.0566923	0.394393	0.311071	0.893499	0.140071	0.730513	0.336166	0.181681	0.949361	0.87295	0.845963	0.3597	0.144649	5.13723e-08
GPR87	0.00174304	0.756125	0.222951	0.215074	0.00605713	0.0443651	0.867618	0.00846464	0.00123874	0.44995	6.77435e-05	0.418112	0.154899	0.403016	0.167556	5.21711e-08
WNT3A	0.282926	2.15914e-11	0.164882	0.0635468	0.146525	0.0792466	0.523441	0.93698	0.0426229	0.354683	0.072372	0.43972	0.879561	0.226203	0.592366	5.22986e-08
HMX1	9.32227e-08	5.77793e-06	0.0458299	0.0643973	0.00804428	0.805105	0.172472	0.398655	0.456321	0.504685	0.323434	0.957763	0.956864	0.610558	0.724449	5.35432e-08
PROKR2	2.36673e-05	6.34116e-09	0.082834	0.0707149	0.102299	0.199705	0.280971	0.551147	0.951227	0.443309	0.205447	0.669721	0.911598	0.469008	0.31071	5.36527e-08
ZSWIM6	3.29397e-05	1.68268e-11	0.203165	0.0556873	0.596266	0.263824	0.342408	0.565928	0.676196	0.795201	0.563427	0.998093	0.872927	0.504728	0.844599	5.37806e-08
IL10	0.0118811	4.72609e-11	0.0354926	0.0458626	0.463515	0.988064	0.32945	0.712002	0.676247	0.262755	0.135083	0.337492	0.511729	0.0661036	0.803167	5.39573e-08
ZFP91	1.53428e-09	0.133336	0.00095892	0.170003	0.129426	0.0394697	0.890283	0.087874	0.847633	0.163868	0.176103	0.823148	0.461843	0.196944	0.886989	5.4027e-08
STAC2	1.16921e-10	0.000782719	0.0698641	0.0389047	0.0919309	0.93779	0.923028	0.622831	0.284824	0.213989	0.976333	0.720022	0.913912	0.124918	0.361962	5.43362e-08
CDKL2	2.61585e-05	9.91506e-07	0.0595578	0.0344766	0.101974	0.0396342	0.0300872	0.887708	0.647566	0.425833	0.0462304	0.903771	0.997666	0.4781	0.699745	5.48226e-08
WDR90	0.1434	2.25902e-09	0.0356016	0.0586066	0.502736	0.660894	0.0075109	0.0588094	0.824655	0.393621	0.365487	0.66897	0.0988957	0.05042	0.572408	5.54508e-08
PHF12	5.63694e-12	0.000730692	0.4251	0.113823	0.0349318	0.992998	0.900354	0.982907	0.416862	0.299268	0.973168	0.377288	0.651352	0.606794	0.205803	5.6008e-08
CHL1	2.80991e-09	3.95954e-07	0.199992	0.1098	0.091446	0.792883	0.544329	0.507415	0.619764	0.520472	0.805995	0.592624	0.771608	0.81847	0.48818	5.67757e-08
RGS9BP	1.28141e-07	2.51152e-05	0.513549	0.0186961	0.00844364	0.411106	0.236986	0.779916	0.486919	0.411599	0.673174	0.495265	0.277268	0.379641	0.166755	5.67933e-08
ARFIP2	0.000304526	5.02167e-07	0.00139511	0.559027	0.268262	0.00610941	0.225297	0.974055	0.179364	0.253138	0.0404955	0.739196	0.799373	0.671071	0.750143	5.71485e-08
PHLDA3	0.00697926	1.5594e-07	0.112499	0.000321075	0.0153571	0.763846	0.351327	0.113282	0.865185	0.227336	0.602325	0.796828	0.828154	0.0545371	0.300355	5.72209e-08
IL5RA	2.41788e-06	2.28152e-08	0.0934948	0.118474	0.560644	0.266648	0.167569	0.283301	0.673095	0.549731	0.609019	0.691694	0.366312	0.16501	0.587311	5.80581e-08
E2F3	0.00249535	5.59991e-10	0.0890422	0.00347798	0.691453	0.86827	0.111848	0.080501	0.785319	0.808797	0.370333	0.961402	0.999105	0.0611265	0.747265	5.83056e-08
AGFG2	1.56253e-06	0.361174	0.0270562	0.0209993	0.103233	0.0378924	0.128561	0.0101391	0.613661	0.0494792	0.191227	0.810269	0.308402	0.170552	0.0597311	5.83451e-08
BRCA2	0.0741933	3.41213e-09	0.0114073	0.000933657	0.274592	0.770019	0.206137	0.0743754	0.796542	0.392526	0.258921	0.796919	0.80687	0.0834152	0.645025	5.88751e-08
RAP1GDS1	2.09912e-09	0.977468	0.222743	0.131624	0.213253	0.0882774	0.158804	0.104598	0.443061	0.045611	0.368379	0.35901	0.0589568	0.714362	0.0118576	5.99244e-08
HMGXB4	0.00149047	4.71158e-06	0.00432899	0.00366499	0.0383156	0.0409681	0.862055	0.160785	0.647661	0.391944	0.0519898	0.915025	0.521648	0.172548	0.953981	5.9973e-08
H4C12	0.0321649	1.76295e-07	0.0957821	0.0610276	0.538042	0.0887237	0.0110434	0.265468	0.176403	0.36013	0.0968592	0.18437	0.013451	0.901901	0.395935	6.0209e-08
ZNF747	1.94131e-08	0.000117855	0.0632314	0.00336194	0.256626	0.171621	0.844316	0.237468	0.818324	0.276106	0.347262	0.701482	0.500952	0.528146	0.406318	6.04326e-08
CCL16	1.16122e-07	2.71614e-07	0.067226	0.104312	0.855443	0.0286839	0.47004	0.696541	0.66359	0.548236	0.168748	0.857857	0.90324	0.77141	0.39312	6.07973e-08
RERE	1.98735e-08	4.47645e-06	0.544036	0.0148781	0.056029	0.460499	0.91998	0.545629	0.298303	0.569426	0.859349	0.228279	0.364343	0.495578	0.463914	6.14572e-08
RAB6B	9.73369e-05	8.26705e-08	0.0423096	0.0621055	0.330742	0.0877221	0.0186382	0.401972	0.906198	0.578633	0.138795	0.898222	0.607728	0.213769	0.681738	6.24095e-08
RCAN2	0.0040903	8.84536e-08	0.0258565	0.082958	0.0413422	0.0166537	0.0900622	0.972194	0.31393	0.474617	0.0513975	0.669256	0.685143	0.190177	0.865005	6.30876e-08
H2BC4	0.0127398	7.03104e-06	0.0363806	0.633703	0.229266	9.39069e-05	0.185285	0.976052	0.0867145	0.536994	0.000919718	0.360409	0.505504	0.533039	0.810512	6.3217e-08
IRX4	1.40235e-06	0.0401993	0.00586161	0.503373	0.00742275	0.687444	0.106098	0.548423	0.114827	0.0106824	0.120717	0.565134	0.0720719	0.892144	0.103305	6.3781e-08
KDSR	2.13714e-05	0.0221001	0.000337011	0.489595	0.985779	0.000107153	0.191596	0.935828	0.888181	0.159795	0.00162697	0.309901	0.569984	0.852783	0.539311	6.41632e-08
SPRY4	0.021456	2.42718e-07	0.416206	0.122388	0.700473	0.00208914	0.000751386	0.471444	0.365321	0.432855	0.013213	0.960717	0.467174	0.920006	0.243238	6.60452e-08
ZNF331	0.000357576	9.44448e-08	0.028468	0.191526	0.159998	0.336899	0.0235297	0.230751	0.307413	0.101364	0.492218	0.972322	0.589065	0.185809	0.334241	6.69116e-08
STK39	0.000426247	3.73423e-06	0.0652646	0.070305	0.00239108	0.342977	0.161536	0.516021	0.933617	0.117473	0.152621	0.339381	0.123022	0.226007	0.375796	6.72796e-08
FURIN	0.00717623	8.48396e-05	0.000950616	0.815142	0.657395	5.21746e-05	0.017228	0.903217	0.423325	0.532859	0.000696247	0.883899	0.914423	0.989479	0.937163	6.72888e-08
TUT7	0.000325518	0.000439942	0.00741527	0.00909232	0.00192794	0.355055	0.347757	0.341324	0.808323	0.0506553	0.193941	0.825636	0.39106	0.0173777	0.851186	6.74689e-08
CD27	0.00194574	8.10907e-09	0.109855	0.0736088	0.361025	0.902139	0.343467	0.0403785	0.882436	0.193669	0.196005	0.468922	0.474332	0.0827058	0.0841682	6.76856e-08
AGPAT1	0.00245817	0.142498	8.98483e-07	0.0356108	0.0727387	0.00210462	0.961602	0.364417	0.443217	0.0594002	0.00830339	0.984194	0.77996	0.348904	0.853356	6.79215e-08
RNF141	3.97945e-08	0.0208902	0.0180958	0.0439429	0.00427839	0.152367	0.973665	0.730373	0.227717	0.109922	0.150791	0.645319	0.743284	0.087204	0.632882	6.8834e-08
PIK3CB	0.000168322	1.88014e-06	0.024885	0.0710835	0.0539333	0.670416	0.0634979	0.410402	0.492243	0.161063	0.337698	0.740929	0.168167	0.0175287	0.997252	6.9054e-08
GALR1	0.000909108	7.86133e-08	0.167587	0.0114387	0.11775	0.0510285	0.0569986	0.578311	0.232026	0.629512	0.05959	0.742821	0.916042	0.200733	0.96437	6.96019e-08
ZNF711	0.0319843	1.76122e-06	0.0678279	0.00213729	0.00651294	0.0498985	0.700693	0.0899684	0.411093	0.106993	0.104253	0.789052	0.648599	0.126378	0.627808	6.96651e-08
DAP	0.0126694	1.06773e-06	0.00132779	0.715652	0.335158	0.00172382	0.0482037	0.998777	0.197192	0.1631	0.0117106	0.507082	0.844546	0.649431	0.850212	7.07424e-08
RRAD	0.000696102	0.000154514	0.0173757	0.00937712	0.0353915	0.232207	0.0890185	0.0445511	0.465915	0.146303	0.408586	0.891062	0.552586	0.043136	0.0943838	7.08137e-08
ASCL4	8.49388e-07	3.28271e-08	0.171627	0.0168393	0.60799	0.981838	0.65955	0.218998	0.610364	0.48444	0.448562	0.509062	0.540263	0.156745	0.815097	7.15741e-08
SCARB1	0.000954242	1.81972e-10	0.0509618	0.108339	0.67996	0.0322179	0.109615	0.609042	0.66229	0.64255	0.179095	0.917695	0.730223	0.655853	0.705308	7.27167e-08
FCRL2	3.74497e-06	2.5858e-07	0.0588936	0.0642684	0.356543	0.493245	0.150951	0.567795	0.777137	0.203472	0.561827	0.295725	0.695712	0.588678	0.0558808	7.28575e-08
ZCWPW2	0.00115538	8.31321e-11	0.561832	0.127767	0.661796	0.0465609	0.0507145	0.426439	0.287884	0.929114	0.159254	0.902476	0.81277	0.305756	0.771516	7.38441e-08
SLC4A11	1.47869e-05	4.06859e-08	0.417483	0.0906927	0.124364	0.303192	0.11122	0.817475	0.0896527	0.594051	0.326559	0.971506	0.947438	0.0478122	0.573413	7.44625e-08
TSHB	6.25035e-05	1.20711e-09	0.220693	0.0977168	0.341639	0.0781772	0.580153	0.1064	0.796275	0.199315	0.255431	0.732491	0.6245	0.814849	0.852021	7.48611e-08
ZNF22	0.000339347	1.74998e-06	0.00245757	0.778	0.0904196	0.102808	0.0135937	0.505068	0.234653	0.113839	0.244472	0.998828	0.21042	0.899164	0.386891	7.49583e-08
SMARCD2	0.000317994	6.74498e-09	0.00487756	0.527569	0.653364	0.0447943	0.0748611	0.604317	0.618152	0.214059	0.19433	0.969349	0.546338	0.45525	0.772292	7.5542e-08
FLNB	2.68167e-09	0.000250761	0.352757	0.141578	0.0129419	0.635369	0.166354	0.844321	0.310709	0.158527	0.780786	0.773509	0.85045	0.258291	0.138976	7.58986e-08
ANXA9	4.60635e-09	2.09219e-05	0.432703	0.865123	0.586178	0.245071	0.0618003	0.464284	0.167688	0.530732	0.0894041	0.125496	0.645214	0.597597	0.619182	7.62356e-08
ALDH1A2	9.30617e-05	9.98529e-07	0.0110756	0.0752754	0.126291	0.10186	0.0236704	0.59064	0.93295	0.263808	0.288926	0.945242	0.200908	0.466242	0.404098	7.62367e-08
HUS1	0.0153232	1.47283e-06	0.0090612	0.0121364	0.237868	0.197666	0.192885	0.0387067	0.872583	0.544987	0.0133306	0.98851	0.757597	0.012827	0.67228	7.65605e-08
ZNF670	0.0038168	1.42716e-07	0.173852	0.00232775	0.252766	0.830063	0.845809	0.0162237	0.88554	0.208253	0.532905	0.909391	0.373292	0.0261956	0.064489	7.6712e-08
AGRP	1.03229e-07	3.54181e-05	0.00552784	0.392693	0.929718	0.110057	0.974735	0.577574	0.851659	0.0129194	0.325103	0.51959	0.908809	0.858991	0.0541055	7.68955e-08
RAB22A	0.234469	7.33032e-14	0.689058	0.0258011	0.417172	0.947293	0.0823523	0.356993	0.791443	0.653633	0.135478	0.51606	0.726659	0.594356	0.653854	7.74437e-08
NCLN	1.02456e-06	4.26253e-08	0.10774	0.417766	0.479036	0.108527	0.0731018	0.37981	0.560091	0.366878	0.395859	0.985545	0.855119	0.368725	0.50582	7.74712e-08
FOXM1	3.85189e-05	2.88451e-10	0.382277	0.028741	0.462401	0.281731	0.229404	0.265875	0.558672	0.965991	0.556856	0.911552	0.832947	0.169458	0.973093	7.77959e-08
YARS1	2.44781e-06	3.50085e-08	0.0733382	0.139335	0.465957	0.0587009	0.258001	0.721805	0.296699	0.481862	0.243818	0.953389	0.749551	0.570149	0.576705	7.78513e-08
CHN2	1.26099e-13	0.313417	0.363236	0.493136	0.4842	0.141903	0.0669542	0.680879	0.178476	0.717063	0.440172	0.202197	0.673276	0.551111	0.390585	7.79566e-08
RAPGEFL1	0.00153558	7.97148e-08	0.165729	0.06763	0.00140039	0.955587	0.0581431	0.8506	0.127907	0.281475	0.44274	0.786684	0.648363	0.0864749	0.579337	7.85189e-08
ZFP90	0.00795542	8.63656e-10	0.0117242	0.322644	0.271628	0.017279	0.235251	0.895663	0.263854	0.265975	0.062472	0.697376	0.681297	0.974439	0.741537	8.10184e-08
RPS6KA6	5.15543e-07	1.45792e-07	0.118337	0.0538797	0.36941	0.269721	0.0514845	0.322583	0.851504	0.5825	0.502791	0.970161	0.784643	0.357034	0.725136	8.144e-08
RFC4	0.00302155	4.57669e-10	0.0976955	0.00142129	0.272018	0.928378	0.543902	0.288299	0.683401	0.776918	0.337739	0.873417	0.796823	0.0505144	0.817714	8.17616e-08
F2R	0.000584334	4.49036e-07	0.000353453	0.0690815	0.0284412	0.817675	0.909412	0.908345	0.507169	0.112286	0.467197	0.408858	0.641708	0.162854	0.297114	8.51749e-08
BAIAP2L2	0.000302904	6.32517e-10	0.282619	0.308386	0.18168	0.198893	0.00452574	0.542986	0.473624	0.577179	0.520812	0.687059	0.867944	0.765379	0.440902	8.64704e-08
CDK12	0.020279	5.32355e-08	0.0691478	0.00869782	0.625237	0.64332	0.0157318	0.0405447	0.930078	0.12745	0.304487	0.840266	0.38695	0.0514607	0.423013	8.65734e-08
OR56A4	2.78742e-05	5.12453e-07	0.0331355	0.0151029	0.382821	0.853207	0.428325	0.19375	0.895344	0.193411	0.749594	0.444713	0.620627	0.0284728	0.217611	8.72194e-08
MCM2	1.82907e-05	8.1576e-10	0.305772	0.0604147	0.713709	0.119119	0.164402	0.232626	0.669356	0.970699	0.413951	0.954271	0.785721	0.258057	0.927387	8.75578e-08
ADAM10	1.25321e-07	0.000452131	0.0173171	0.0284403	0.188622	0.78592	0.219742	0.136932	0.510073	0.0779144	0.634443	0.617672	0.997029	0.0397087	0.566003	8.78229e-08
CXCR4	0.000495408	5.18917e-09	0.036235	0.0843588	0.167199	0.194143	0.142197	0.983251	0.374768	0.279903	0.502472	0.922258	0.325822	0.10506	0.742558	8.87006e-08
TNFRSF21	0.00376499	1.68301e-06	0.557538	0.934297	0.121595	0.0264107	0.000896591	0.995994	0.0277401	0.551784	0.00934786	0.379861	0.559227	0.178441	0.858959	8.87457e-08
SLC35B2	0.00120214	4.77319e-05	0.0006028	0.82332	0.452735	0.000515383	0.177697	0.967845	0.210855	0.252588	0.00545474	0.909038	0.564966	0.733427	0.353132	8.88318e-08
RAP1B	0.187987	3.08679e-11	0.0873845	0.076252	0.964419	0.247831	0.00924292	0.189571	0.618501	0.569007	0.141937	0.361395	0.343272	0.508418	0.894081	9.08542e-08
CEBPD	0.00260483	4.94549e-07	0.126346	0.00378652	0.125708	0.86176	0.171801	0.188628	0.726883	0.113455	0.571335	0.528436	0.704153	0.00764537	0.159278	9.16533e-08
PDE4B	0.00720639	1.27937e-10	0.018008	0.125426	0.412477	0.889154	0.269086	0.878813	0.578868	0.19031	0.349786	0.491862	0.387579	0.0424727	0.824325	9.20091e-08
SSRP1	2.38724e-07	2.59405e-08	0.232905	0.101964	0.620936	0.101781	0.467728	0.272611	0.685709	0.729503	0.415409	0.973244	0.615334	0.680972	0.464725	9.23137e-08
RHBDL3	1.82018e-09	3.23456e-05	0.102113	0.0478369	0.121744	0.176257	0.311374	0.797225	0.720342	0.375425	0.443982	0.877309	0.932922	0.655753	0.473265	9.23796e-08
TBXA2R	1.21916e-05	4.49697e-05	0.103902	0.00276826	0.0335447	0.438501	0.913365	0.0786639	0.746412	0.0877638	0.562302	0.645731	0.780884	0.195801	0.0775627	9.27789e-08
TMED7-TICAM2	2.70622e-12	0.758922	0.0376868	0.320405	0.0122965	0.177531	0.618317	0.439011	0.400676	0.131993	0.608944	0.429197	0.417022	0.559408	0.994775	9.29545e-08
IKZF1	0.00116279	4.88427e-10	0.0433101	0.0649879	0.593581	0.823784	0.23144	0.672376	0.779474	0.161645	0.223704	0.279447	0.961916	0.121301	0.422443	9.3073e-08
ZNF461	1.25587e-09	5.07036e-06	0.138856	0.362251	0.203392	0.66612	0.272787	0.39115	0.173871	0.522925	0.72477	0.833791	0.918531	0.397431	0.511318	9.34323e-08
IL10RA	0.00830105	2.55989e-10	0.040624	0.0393574	0.345873	0.934456	0.272468	0.779494	0.767259	0.189372	0.11706	0.301186	0.934251	0.0814401	0.527731	9.40922e-08
FGD4	2.30483e-06	0.0136799	0.00443565	0.0824295	0.00214779	0.520391	0.649548	0.153416	0.574231	0.0122912	0.478111	0.539041	0.396059	0.0956341	0.542568	9.41287e-08
HDAC6	0.0488664	3.92687e-07	0.00258866	0.0690056	0.974198	0.00942929	0.000490542	0.816802	0.740969	0.336648	0.048457	0.70521	0.632584	0.848042	0.833256	9.42305e-08
TLX1	0.00021476	2.63307e-09	0.209437	0.00485401	0.0416258	0.668507	0.347959	0.221121	0.700535	0.633354	0.889432	0.624868	0.525842	0.43736	0.692203	9.45632e-08
EOMES	0.00338811	5.69014e-08	0.00488089	0.0799127	0.251679	0.448115	0.259442	0.730935	0.620172	0.0373585	0.089748	0.489364	0.976189	0.0933324	0.325805	9.49167e-08
TYMS	3.02428e-07	1.72393e-08	0.352519	0.0305183	0.497105	0.232603	0.382514	0.572334	0.60406	0.859438	0.64265	0.979659	0.630546	0.241772	0.691064	9.53421e-08
PLEK2	7.60015e-09	2.80386e-05	0.579789	0.152973	0.0633596	0.708458	0.414676	0.891148	0.147174	0.135115	0.968418	0.629639	0.618045	0.530978	0.0393224	9.55621e-08
OR2W3	0.00328155	8.63906e-10	0.128147	0.030175	0.0403308	0.352098	0.0216014	0.410071	0.770783	0.624485	0.293666	0.787703	0.460176	0.820239	0.86155	9.67437e-08
ASF1B	3.25922e-05	1.04653e-09	0.143863	0.0853275	0.403365	0.0934198	0.210945	0.686542	0.44812	0.768905	0.295515	0.94534	0.866594	0.342924	0.765876	9.69182e-08
STOML3	0.00787189	6.15607e-07	0.205887	0.0347558	0.0738368	0.114683	0.659386	0.510007	0.0508867	0.323196	0.206265	0.13413	0.0918352	0.167759	0.0725467	9.71321e-08
RACGAP1	3.52994e-05	6.24836e-10	0.319407	0.0391059	0.478162	0.30086	0.296403	0.115787	0.517885	0.893831	0.595951	0.858434	0.954647	0.197422	0.842444	9.83712e-08
SYNGAP1	2.85081e-07	4.41302e-06	0.104023	0.0292775	0.13353	0.158473	0.973695	0.807523	0.459079	0.33391	0.557285	0.293818	0.474601	0.375974	0.182018	9.94717e-08
MKNK2	0.629634	1.33559e-12	0.210412	0.0421316	0.0995565	0.770287	0.49799	0.184038	0.830223	0.262406	0.27615	0.629979	0.182313	0.427784	0.335663	9.94922e-08
UNC5C	6.79718e-11	1.23886e-05	0.104164	0.0585775	0.717172	0.628676	0.878323	0.579494	0.872818	0.458532	0.940351	0.437593	0.869417	0.892868	0.348673	1.00253e-07
ADGRG1	0.00932804	2.06543e-08	0.0246412	0.836989	0.472191	0.0129262	0.00843324	0.850776	0.124847	0.367533	0.0243109	0.362951	0.94197	0.902055	0.900013	1.01995e-07
RAB3D	0.191689	0.0901436	0.000227382	0.142236	0.166775	0.0349252	0.0166767	0.56205	0.645619	0.000135695	0.0616026	0.736897	0.0231815	0.49023	0.0391508	1.02135e-07
NUFIP1	0.00101313	2.03303e-11	0.186819	0.0079319	0.377253	0.982465	0.512727	0.253467	0.654975	0.614322	0.550479	0.542393	0.933692	0.476185	0.716321	1.05089e-07
TRIM22	0.00737037	3.09761e-09	0.0204397	0.0635553	0.537192	0.267183	0.359697	0.432959	0.940844	0.0525475	0.103126	0.548645	0.647729	0.241783	0.196679	1.0621e-07
NPBWR1	3.91576e-09	0.000117636	0.0143141	0.0412871	0.117333	0.971511	0.96123	0.561441	0.566612	0.1651	0.93241	0.55657	0.77415	0.320782	0.289211	1.07846e-07
RASSF4	0.000414056	2.3435e-07	0.0128295	0.281004	0.0634413	0.819976	0.335378	0.783456	0.124562	0.0403793	0.045195	0.938809	0.885892	0.0772751	0.840586	1.08266e-07
NKRF	0.00014879	4.38183e-09	0.106937	0.0038458	0.558862	0.65049	0.463299	0.0432134	0.947692	0.637561	0.311418	0.998255	0.895897	0.259905	0.688179	1.0829e-07
GLP1R	2.94672e-09	6.0186e-05	0.347699	0.104327	0.842105	0.548449	0.310249	0.0414694	0.819376	0.400532	0.529483	0.179613	0.574306	0.682058	0.129383	1.10492e-07
TBL1XR1	0.000462639	1.06455e-05	0.0186405	0.00511416	0.0733393	0.197611	0.522946	0.0489573	0.943621	0.066934	0.183505	0.782692	0.995533	0.126627	0.304911	1.1084e-07
JAK3	0.000177157	1.10686e-06	0.00771078	0.0812673	0.458478	0.292004	0.76752	0.764382	0.486998	0.0314745	0.570292	0.328937	0.315347	0.616547	0.0112993	1.1112e-07
ACKR3	0.011897	3.03051e-08	0.0010044	0.0185092	0.0604854	0.784642	0.774572	0.829305	0.898074	0.107381	0.721047	0.897173	0.139866	0.139494	0.24544	1.11219e-07
WWOX	1.6497e-09	0.0175227	0.0379806	0.0467004	0.0130983	0.453425	0.789098	0.132672	0.363258	0.212255	0.894993	0.795961	0.504186	0.139665	0.498267	1.1172e-07
TARDBP	6.5462e-07	3.44431e-08	0.37412	0.00907326	0.491819	0.872732	0.613697	0.0487952	0.683401	0.805469	0.788179	0.980171	0.746692	0.322777	0.611977	1.12053e-07
LAT2	0.0212473	2.28912e-10	0.0365229	0.0493658	0.279272	0.937654	0.322344	0.414374	0.645426	0.347772	0.0922031	0.541888	0.514199	0.0819604	0.430405	1.12922e-07
PSPC1	0.000345901	7.69952e-10	0.0487981	0.0464295	0.481311	0.223891	0.0685573	0.610642	0.85982	0.745146	0.413863	0.96664	0.505601	0.18835	0.940763	1.13063e-07
HNRNPK	9.38138e-10	9.11844e-06	0.0536273	0.0846599	0.197703	0.806859	0.595082	0.22732	0.755645	0.578557	0.963009	0.992653	0.719352	0.280127	0.886313	1.13119e-07
PGBD1	6.84467e-05	7.99635e-06	0.0269636	0.456516	0.0182365	0.0822796	0.0328222	0.803009	0.31454	0.0974004	0.135759	0.597542	0.569597	0.37439	0.443152	1.13149e-07
PPP1R1A	1.27145e-06	2.79583e-05	0.0941958	0.0348092	0.0330232	0.246624	0.160213	0.547001	0.40106	0.423871	0.327834	0.691149	0.909203	0.0417064	0.51604	1.13307e-07
RASAL3	0.000297319	3.73843e-08	0.0667957	0.0373683	0.370693	0.902778	0.323056	0.389309	0.813466	0.141461	0.293043	0.177761	0.76327	0.145107	0.0815345	1.1394e-07
MSTN	0.00315306	3.7283e-09	0.0490717	0.874195	0.980336	0.00326555	0.0075943	0.567907	0.828962	0.898056	0.0265849	0.795369	0.785141	0.795137	0.93471	1.14872e-07
ZNF541	1.82639e-12	0.00172393	0.172603	0.107899	0.326399	0.814049	0.258844	0.471176	0.593888	0.450865	0.600481	0.946004	0.660205	0.494311	0.692735	1.16589e-07
SUV39H2	3.97041e-06	3.75816e-08	0.150524	0.00604377	0.335859	0.655951	0.717657	0.0789211	0.822283	0.807198	0.705341	0.928133	0.955195	0.117857	0.795714	1.17314e-07
LHX4	0.250627	4.19863e-06	0.000832398	0.00144495	0.184555	0.169506	0.124349	0.072003	0.554276	0.243033	0.0562125	0.981219	0.289509	0.119968	0.736363	1.19077e-07
ZNF169	0.730271	0.00031676	7.94869e-05	0.0146203	0.0397674	0.0273181	0.118581	0.279107	0.341032	0.0972046	0.0198238	0.859367	0.330635	0.0569586	0.661003	1.19793e-07
APPL1	2.1001e-07	0.0187489	0.00289692	0.0354524	0.121796	0.154721	0.955268	0.0658128	0.892171	0.021077	0.46236	0.707564	0.421904	0.0996936	0.548867	1.19903e-07
CSRNP2	8.26258e-05	4.71554e-05	0.000589565	0.181842	0.00110772	0.562256	0.565513	0.991623	0.231478	0.0408578	0.736587	0.737937	0.996535	0.27163	0.34017	1.21144e-07
FGG	4.57225e-06	0.211498	0.195248	0.856244	0.453966	0.000163758	0.862489	0.100795	0.249697	0.22937	0.00147022	0.0267033	0.889625	0.324249	0.102275	1.21447e-07
ZNF691	0.000430395	0.000173682	0.00729722	0.0198665	0.0670402	0.448834	0.066551	0.0949759	0.982233	0.0272285	0.267668	0.967788	0.120796	0.052481	0.779272	1.22939e-07
CBX3	7.87704e-05	2.52084e-09	0.177618	0.00389555	0.142359	0.655869	0.420301	0.468395	0.76326	0.782606	0.349385	0.662921	0.674565	0.374358	0.799753	1.22966e-07
GMFB	5.09256e-07	0.000308961	0.0464888	0.0238748	0.0288878	0.33764	0.505054	0.0957736	0.697674	0.140711	0.545675	0.560348	0.845141	0.0521666	0.647717	1.23038e-07
CNOT8	5.36706e-11	0.742409	0.0353537	0.11329	0.0246297	0.0486516	0.527941	0.760919	0.898569	0.30447	0.207954	0.276138	0.740832	0.153265	0.516029	1.23147e-07
UBE2D3	1.69592e-11	0.312698	0.0273487	0.148793	0.0237605	0.371425	0.0752883	0.827895	0.469629	0.216614	0.807057	0.440171	0.772951	0.675137	0.318354	1.23814e-07
PIAS2	2.3086e-06	0.036523	0.00375291	0.780377	0.931706	0.00192788	0.158015	0.178703	0.537662	0.0729986	0.0163038	0.332313	0.47448	0.249652	0.230791	1.25663e-07
OR10C1	0.00403408	3.31023e-08	0.0561129	0.017264	0.0139675	0.525635	0.232502	0.661772	0.322492	0.424445	0.566553	0.0914542	0.9086	0.329065	0.235208	1.25749e-07
HDAC1	9.96408e-07	4.53721e-08	0.269159	0.134946	0.0984366	0.206825	0.154638	0.68311	0.431403	0.729473	0.230056	0.873398	0.785475	0.487569	0.884217	1.28995e-07
RNF43	0.0194256	1.78074e-11	0.315634	0.0233003	0.153795	0.658422	0.0127513	0.776874	0.946795	0.425079	0.510342	0.642817	0.835935	0.383928	0.708489	1.30165e-07
PLEKHB1	5.42808e-13	0.639812	0.0129581	0.383033	0.114589	0.13065	0.913017	0.286215	0.808948	0.348554	0.324863	0.385217	0.891621	0.480248	0.759118	1.31028e-07
ZNF189	0.0108556	1.99332e-06	0.168367	0.000492494	0.0360116	0.873741	0.12883	0.109958	0.533031	0.112524	0.440737	0.895281	0.44478	0.0430814	0.21723	1.32707e-07
SLC9A3R1	0.00138886	6.49023e-08	0.0171289	0.620694	0.0804032	0.0260352	0.0247412	0.873142	0.353479	0.428085	0.14003	0.527301	0.536895	0.5067	0.600274	1.33041e-07
GPR12	5.56366e-08	9.29557e-07	0.396316	0.017679	0.414163	0.426819	0.10488	0.428767	0.147003	0.849838	0.636591	0.76547	0.967349	0.565041	0.828364	1.33417e-07
CREBRF	6.725e-05	3.73462e-09	0.0388435	0.375543	0.634798	0.0292739	0.237433	0.745967	0.279983	0.529788	0.165184	0.98888	0.708944	0.532034	0.72091	1.33475e-07
PKN2	2.43343e-05	0.00442146	0.00105031	0.0325782	0.0346729	0.0926338	0.584955	0.109438	0.72308	0.0268874	0.217109	0.86488	0.259893	0.143657	0.774196	1.33976e-07
CALR	8.58884e-05	5.48737e-07	0.0345618	0.553393	0.389212	0.00387356	0.175701	0.992078	0.132266	0.502958	0.0331362	0.693145	0.557505	0.738602	0.542098	1.35039e-07
ZNF347	1.70577e-08	5.52713e-05	0.0337532	0.230991	0.0690123	0.689718	0.248185	0.690323	0.226389	0.0849289	0.969023	0.810669	0.949981	0.390066	0.242322	1.35621e-07
NFATC3	0.0804688	0.0591922	1.16796e-05	0.540392	0.195963	0.000405536	0.463954	0.247528	0.130281	0.00504245	0.00566034	0.613281	0.983408	0.760354	0.177371	1.37555e-07
CD81	0.16393	1.90871e-05	0.0338225	0.00279743	0.00100893	0.534108	0.342273	0.138145	0.930147	0.200416	0.00846472	0.680096	0.847348	0.0127293	0.957998	1.38316e-07
MS4A14	0.0128631	7.02529e-11	0.0127561	0.165137	0.668577	0.290563	0.490979	0.664761	0.731096	0.151514	0.238048	0.201104	0.551275	0.290518	0.817478	1.38485e-07
SMAD4	0.0915798	9.7865e-10	0.362538	0.892309	0.856704	0.000865723	0.192607	0.852013	0.498884	0.471694	0.00171468	0.444232	0.358355	0.704079	0.534233	1.40152e-07
PRSS8	0.0381181	2.72111e-08	0.002322	0.587565	0.204985	0.0115349	0.0347278	0.904325	0.368504	0.326222	0.0646097	0.361406	0.420803	0.818215	0.842207	1.40466e-07
CCR4	0.000215685	3.87094e-09	0.0583628	0.0624934	0.673199	0.677123	0.237521	0.602768	0.882273	0.185453	0.372499	0.307904	0.878726	0.0879774	0.296745	1.4049e-07
CD14	0.445032	1.97021e-07	0.00169018	0.00759554	0.0941335	0.317947	0.539976	0.614197	0.780322	0.0848539	0.0378881	0.817087	0.191741	0.0425079	0.45879	1.40588e-07
TMPRSS2	0.0229604	2.10912e-07	0.0287282	0.468816	0.0221485	0.013136	0.0531723	0.818542	0.646396	0.119177	0.0642216	0.360169	0.308226	0.275669	0.685217	1.40632e-07
CCR7	0.000232221	1.79009e-09	0.0881243	0.110399	0.575724	0.858893	0.172843	0.442407	0.876585	0.269621	0.396068	0.303229	0.966351	0.0571811	0.366139	1.43045e-07
ITGB5	0.15585	5.1803e-07	0.000373219	0.0112199	0.00889421	0.44956	0.595191	0.276822	0.504744	0.0724861	0.676879	0.961122	0.576751	0.100724	0.28583	1.43277e-07
RGS7BP	3.88669e-07	2.26621e-08	0.0416101	0.098164	0.470532	0.212087	0.733846	0.664636	0.805744	0.528736	0.55452	0.733971	0.909808	0.562456	0.567876	1.43514e-07
MAML2	1.06496e-06	1.41313e-06	0.00343967	0.131148	0.245549	0.199542	0.702376	0.652015	0.937951	0.219539	0.538218	0.893482	0.429993	0.841917	0.161883	1.43701e-07
ZCCHC7	2.62943e-07	0.00322064	0.11048	0.00543552	0.0547308	0.103125	0.103851	0.197798	0.891475	0.24878	0.345647	0.749255	0.238092	0.618044	0.180353	1.45347e-07
SCG5	1.61593e-05	1.56155e-07	0.108032	0.0194497	0.620941	0.280489	0.380498	0.0605443	0.673784	0.513341	0.739749	0.486854	0.168231	0.6223	0.329438	1.47043e-07
TIAL1	6.12182e-08	8.00661e-06	0.10578	0.00627526	0.101511	0.577187	0.952015	0.236385	0.784895	0.450443	0.432683	0.904301	0.924856	0.321667	0.518816	1.47268e-07
TMEM9B	6.76904e-06	5.28675e-05	0.00542122	0.427377	0.00355851	0.0841401	0.295089	0.93141	0.252191	0.154124	0.343363	0.414455	0.664338	0.808711	0.453867	1.47748e-07
RHOXF2B	0.000561393	1.48102e-07	0.0416875	0.16984	0.0870112	0.0205218	0.132574	0.686834	0.158631	0.331921	0.0597045	0.693822	0.642886	0.998854	0.703097	1.50204e-07
TGIF2LY	0.000447062	0.0123134	0.000465526	0.344654	0.000413783	0.760092	0.891018	0.66744	0.48429	0.00129419	0.337799	0.753855	0.351079	0.228312	0.0446256	1.5027e-07
IRF2BP2	0.0570529	6.46997e-11	0.0379131	0.175906	0.687111	0.672391	0.134091	0.465985	0.906798	0.157755	0.103836	0.378871	0.529856	0.13466	0.331794	1.50674e-07
NDP	1.81205e-12	0.00124028	0.286208	0.163535	0.296848	0.84446	0.1422	0.334446	0.879721	0.898111	0.991193	0.856017	0.429347	0.291353	0.902489	1.50923e-07
AMFR	0.743437	1.07652e-10	0.170998	0.00739127	0.325711	0.700927	0.163545	0.0845181	0.349546	0.74417	0.257394	0.234491	0.915554	0.073931	0.280483	1.51181e-07
CORO2A	0.0233387	1.91674e-09	0.168258	0.0970584	0.00648995	0.295469	0.0356338	0.883806	0.460407	0.298892	0.36128	0.407635	0.681753	0.231448	0.68031	1.52096e-07
RAPGEF4	6.08377e-12	0.00144224	0.146803	0.165184	0.283215	0.360485	0.691637	0.395774	0.819737	0.425193	0.573947	0.751958	0.52805	0.392484	0.531392	1.54851e-07
ZNF335	0.0451479	2.29312e-07	0.465705	0.153654	0.913357	0.0114691	0.00141041	0.168599	0.942538	0.577129	0.0220354	0.358311	0.0797807	0.523323	0.300104	1.55715e-07
RASIP1	6.80248e-05	2.86311e-07	0.469565	0.00560718	0.126321	0.597344	0.640464	0.410525	0.589217	0.256274	0.1775	0.449348	0.638328	0.0817341	0.155624	1.55908e-07
RAB26	0.276577	2.30174e-06	0.000522648	0.617332	0.0476108	0.00648911	0.136324	0.45506	0.321111	0.059982	0.0131871	0.321997	0.585454	0.565132	0.956971	1.58553e-07
TBC1D17	0.00169564	8.04816e-06	0.0398276	0.00565304	0.00478886	0.372899	0.368877	0.109902	0.789304	0.0549106	0.500599	0.691871	0.376296	0.285326	0.287237	1.59661e-07
GSX2	3.21787e-06	3.66955e-07	0.243397	0.100091	0.46985	0.304581	0.0198959	0.106537	0.631504	0.22032	0.200839	0.926532	0.771574	0.896418	0.663715	1.60446e-07
CEACAM1	0.00866287	1.91971e-11	0.858434	0.0795964	0.245857	0.115561	0.0532901	0.971734	0.346697	0.822674	0.208148	0.475418	0.938431	0.251349	0.934934	1.60815e-07
ADCY4	1.96122e-07	4.28249e-07	0.216379	0.0134267	0.307913	0.481362	0.631492	0.840353	0.572759	0.420687	0.763856	0.562368	0.752907	0.313477	0.22389	1.61791e-07
ZNF875	2.31791e-08	0.000193811	0.238824	0.246313	0.0345655	0.369578	0.409878	0.511113	0.655357	0.167847	0.610584	0.49959	0.360017	0.129207	0.0955849	1.62364e-07
ZBTB25	5.19399e-05	0.000210807	0.0286945	0.695642	0.630768	0.0018996	0.176303	0.146688	0.258714	0.214179	0.00933616	0.139035	0.356054	0.891252	0.684296	1.62648e-07
EPHA10	0.0199313	8.69296e-09	0.123794	0.03796	0.0758442	0.514087	0.0019359	0.65572	0.882844	0.198685	0.819141	0.94387	0.133873	0.353484	0.411999	1.63466e-07
ZFPM1	0.105594	4.13946e-06	0.00205307	0.941452	0.37487	0.0190533	0.0240153	0.405964	0.693948	0.00475182	0.122173	0.616691	0.0914572	0.364605	0.220901	1.6464e-07
ADRA1B	1.6713e-09	0.00145206	0.0738615	0.0358956	0.0037075	0.485303	0.371627	0.447593	0.754308	0.574571	0.688465	0.854288	0.641428	0.67814	0.506803	1.65212e-07
MSH2	0.000105305	5.29468e-07	0.0413159	0.00529582	0.155309	0.456604	0.649444	0.0256958	0.495111	0.333671	0.628007	0.963861	0.528508	0.224831	0.634274	1.65843e-07
PLEKHG6	0.00625579	1.07619e-09	0.0572879	0.305631	0.205846	0.0829172	0.00592857	0.780188	0.546599	0.907406	0.254649	0.206136	0.597746	0.786594	0.956943	1.66059e-07
GPR18	3.83005e-05	9.17116e-08	0.0519474	0.0854342	0.944545	0.224447	0.178591	0.320306	0.855054	0.123554	0.208398	0.614047	0.686555	0.281508	0.22071	1.66067e-07
ZNF658	0.00386254	4.70953e-07	0.285653	0.567135	0.288423	0.00164291	0.132415	0.779172	0.0746014	0.441365	0.0105942	0.557205	0.187186	0.974752	0.218514	1.68817e-07
FOSB	0.000411251	2.47895e-08	0.247826	0.0155477	0.0695918	0.568295	0.0184637	0.738204	0.732203	0.629767	0.847565	0.791828	0.49523	0.0467637	0.736068	1.68869e-07
E2F1	0.00171901	2.9331e-11	0.331049	0.074334	0.758982	0.0865308	0.103217	0.400239	0.504278	0.955719	0.276738	0.97429	0.730667	0.352238	0.997079	1.69442e-07
YEATS4	3.15978e-07	1.54297e-06	0.318915	0.00598709	0.0656805	0.66611	0.525551	0.293924	0.942029	0.491364	0.963671	0.813003	0.275197	0.65435	0.284091	1.74057e-07
ZNF483	2.88489e-07	2.82869e-07	0.24483	0.112863	0.226945	0.075438	0.133511	0.867835	0.497035	0.647343	0.296269	0.960846	0.774467	0.619892	0.599178	1.75218e-07
GATA4	0.00116576	1.04073e-05	0.00296016	0.943382	0.0435199	0.159027	0.0525164	0.849413	0.561403	0.0106105	0.30947	0.109781	0.280755	0.269376	0.739363	1.75746e-07
ZC3H15	1.86857e-07	1.93588e-07	0.276264	0.0051413	0.117054	0.620783	0.640556	0.391858	0.984019	0.630525	0.832333	0.710023	0.763626	0.557196	0.818586	1.77089e-07
OPN1SW	0.00575585	2.65762e-08	0.0348497	0.479538	0.201996	0.0401457	0.0742318	0.397302	0.406816	0.0810112	0.175104	0.682116	0.240203	0.349027	0.594872	1.7744e-07
GABRA5	0.000193923	1.92296e-07	0.0124338	0.0666288	0.0537667	0.319572	0.0208922	0.403933	0.665061	0.410928	0.231724	0.958727	0.988366	0.7041	0.635589	1.77718e-07
PLRG1	6.4347e-11	0.315298	0.220089	0.0367146	0.121142	0.0864491	0.206073	0.202683	0.897854	0.235451	0.392792	0.576143	0.434028	0.596312	0.135557	1.77783e-07
AKAP4	0.0462998	7.22593e-10	0.306935	0.00670012	0.334447	0.256411	0.139017	0.00635732	0.251356	0.664945	0.481923	0.857806	0.801648	0.791576	0.529218	1.78423e-07
GPSM3	0.000253079	0.000857381	0.00700874	0.030952	0.0555345	0.049036	0.793629	0.0369788	0.413936	0.143343	0.0528941	0.68614	0.456046	0.0693309	0.474275	1.78916e-07
BNC1	0.00103517	0.0286154	0.0180059	0.296097	0.0261928	0.927548	0.18298	0.00389465	0.00857106	0.0805215	0.00259132	0.78257	0.0966078	0.705084	0.467534	1.79315e-07
TBC1D10C	0.00149616	8.22351e-08	0.044874	0.0686712	0.418197	0.983827	0.441143	0.259735	0.742402	0.0516052	0.391763	0.552422	0.53506	0.0700618	0.0220118	1.79735e-07
ZC3H3	0.00362374	2.14836e-10	0.182541	0.298321	0.845397	0.0906736	0.0543593	0.21814	0.57674	0.493866	0.205588	0.902094	0.162332	0.468376	0.800529	1.81364e-07
NSD3	3.47744e-08	0.285837	0.000116274	0.371586	0.159515	0.11721	0.528891	0.0936557	0.794429	0.0806196	0.340685	0.634883	0.463201	0.0694855	0.698764	1.81379e-07
KIT	1.875e-05	2.24251e-09	0.396938	0.0792661	0.628407	0.434518	0.131546	0.324278	0.807286	0.868094	0.138742	0.91209	0.678642	0.207909	0.64436	1.81709e-07
NR0B1	3.95417e-07	3.88919e-08	0.171943	0.132806	0.537581	0.680136	0.0958619	0.170555	0.545998	0.747291	0.558743	0.939663	0.984734	0.362868	0.783834	1.8343e-07
TRPC3	4.49884e-06	3.98619e-05	6.97724e-05	0.197785	0.362546	0.300181	0.717981	0.955946	0.503579	0.0699886	0.669587	0.734594	0.661268	0.536559	0.110834	1.83495e-07
MATK	0.0120983	3.8131e-09	0.257432	0.00139664	0.292688	0.48358	0.649706	0.0650104	0.723937	0.298762	0.0994524	0.697417	0.761264	0.549022	0.20332	1.83879e-07
TRIB3	0.00149557	3.83438e-11	0.169207	0.151104	0.919611	0.0722067	0.0860715	0.393348	0.618879	0.530268	0.225139	0.680092	0.983298	0.862522	0.917039	1.86288e-07
GPR85	0.0176712	2.69739e-05	1.82158e-05	0.326778	0.0763107	0.637151	0.758481	0.249648	0.889391	0.00221969	0.847955	0.208863	0.0850568	0.832167	0.20098	1.87391e-07
TRAPPC2	0.00054877	0.249422	0.00437386	0.237081	0.202371	0.000183179	0.000176852	0.717544	0.388838	0.560518	0.00232313	0.752359	0.713222	0.790599	0.915057	1.88688e-07
THOC1	0.000151434	0.000616157	0.00398509	0.00518016	0.0771343	0.00739685	0.3572	0.147152	0.394913	0.514383	0.0306054	0.937142	0.828321	0.614295	0.767999	1.88969e-07
ZNF177	2.09228e-06	1.70603e-05	0.0434426	0.732731	0.0774557	0.14738	0.0878269	0.537858	0.0600718	0.242665	0.413594	0.698837	0.539504	0.63023	0.150633	1.8966e-07
ITGA2	8.45632e-07	2.18622e-06	0.224461	0.107297	0.111223	0.961253	0.114489	0.913498	0.120344	0.44298	0.585155	0.792107	0.278019	0.173895	0.225978	1.91804e-07
ZNF785	3.09137e-06	0.00603126	0.209348	0.0514291	0.183731	0.149512	0.330847	0.154425	0.492494	0.0680996	0.424209	0.183944	0.0544946	0.572437	0.00589575	1.92983e-07
RGMB	0.00289227	5.8467e-08	0.0273378	0.136137	0.0866932	0.0171856	0.091193	0.724454	0.548341	0.579716	0.0540634	0.992214	0.821257	0.185108	0.844961	1.93062e-07
NMBR	9.97018e-05	5.77288e-09	0.384402	0.0581552	0.0910579	0.174159	0.0668981	0.645386	0.364521	0.461022	0.491303	0.960381	0.755764	0.491911	0.523002	1.93201e-07
RAD51	4.68649e-06	2.57973e-09	0.510179	0.0234211	0.348489	0.379543	0.307843	0.319527	0.527645	0.900863	0.662041	0.934383	0.703239	0.487011	0.720834	1.93797e-07
NAB1	9.54266e-08	0.299477	0.00188327	0.040831	0.341365	0.0155732	0.227532	0.488375	0.139547	0.314254	0.0350068	0.851372	0.774942	0.205827	0.504569	1.93911e-07
PRDM4	8.72345e-06	2.89645e-06	0.173524	0.00717183	0.313067	0.634628	0.0815108	0.0732785	0.865513	0.241345	0.695615	0.76511	0.911204	0.13038	0.280085	1.95365e-07
INPP1	3.96958e-10	0.0474012	0.592392	0.359227	0.00902687	0.457206	0.672124	0.876161	0.0221673	0.0908791	0.615865	0.79359	0.670463	0.475191	0.0453445	1.95738e-07
PDE5A	0.000127962	8.8516e-09	0.0659094	0.171408	0.630572	0.0117174	0.290198	0.818196	0.349677	0.615771	0.0815972	0.950392	0.787558	0.504312	0.934339	1.96399e-07
PDK1	1.30382e-08	0.00153534	0.0310076	0.00874936	0.109218	0.670892	0.980761	0.337846	0.869985	0.0632247	0.924279	0.242429	0.857686	0.423392	0.236879	1.97064e-07
TAL1	7.79307e-06	7.78807e-09	0.311645	0.0142893	0.468997	0.699353	0.527364	0.970804	0.280416	0.76152	0.485133	0.658315	0.800432	0.0971306	0.58456	1.97915e-07
OR4K13	0.0706223	2.63723e-09	0.0222929	0.0672949	0.079075	0.562006	0.128651	0.277298	0.593579	0.614182	0.333167	0.903384	0.796204	0.00442379	0.824437	1.98372e-07
ACAP1	0.0022599	3.23517e-10	0.107011	0.148063	0.485137	0.581807	0.260797	0.150734	0.869144	0.245012	0.243661	0.58847	0.784237	0.302969	0.154637	2.01315e-07
SMARCC1	4.8498e-05	8.11358e-07	0.0361445	0.0136807	0.175771	0.643193	0.542589	0.0253155	0.659852	0.233696	0.601579	0.777011	0.766173	0.230499	0.375365	2.01485e-07
CAMK4	0.000122357	6.11016e-07	0.00588588	0.0709602	0.256101	0.746582	0.284906	0.878974	0.341737	0.0953526	0.0685229	0.635957	0.976036	0.195134	0.363082	2.03815e-07
ABRA	7.095e-05	1.43426e-08	0.0966123	0.0966393	0.291885	0.0370382	0.17499	0.442679	0.787473	0.514893	0.163318	0.922698	0.730876	0.624023	0.667001	2.04845e-07
ZNF665	2.26254e-06	2.64653e-08	0.0747549	0.234493	0.161952	0.243815	0.266214	0.683645	0.130701	0.728522	0.695204	0.935619	0.88662	0.613292	0.585878	2.05736e-07
TSPAN6	0.000470658	6.36464e-09	0.706932	0.102721	0.560375	0.10061	0.0313997	0.876294	0.289438	0.329169	0.0444467	0.411684	0.842246	0.603726	0.499965	2.06424e-07
ZFYVE21	0.230591	1.84831e-09	0.16545	0.000766738	0.61868	0.363044	0.0125366	0.216712	0.849403	0.557196	0.310504	0.610839	0.368758	0.17955	0.767247	2.07273e-07
HAT1	4.09865e-07	4.31452e-07	0.467768	0.00362682	0.147526	0.807265	0.771333	0.192463	0.981027	0.516113	0.933969	0.719712	0.460008	0.515175	0.352219	2.07488e-07
ZNF131	0.00029452	9.26537e-08	0.145295	0.00189372	0.182603	0.585293	0.708124	0.0316217	0.923892	0.394416	0.614798	0.750579	0.566638	0.233949	0.381717	2.09579e-07
USP20	1.50347e-07	0.000813242	0.482517	0.0215255	0.00774584	0.486685	0.380637	0.478003	0.316348	0.276274	0.876558	0.46779	0.112049	0.310495	0.141378	2.10186e-07
TDRD3	3.95345e-08	0.570124	0.0613019	0.0427159	0.00923976	0.0155535	0.110425	0.289656	0.368475	0.191667	0.0973978	0.604998	0.995577	0.490137	0.279228	2.10463e-07
CD79A	1.49315e-05	8.1386e-08	0.151997	0.140322	0.927704	0.79347	0.169308	0.127452	0.812364	0.241225	0.503245	0.438425	0.729903	0.17971	0.0664347	2.11667e-07
DZIP3	1.31927e-05	2.36079e-07	0.019018	0.287778	0.39353	0.22573	0.358849	0.678956	0.42415	0.0345367	0.648562	0.795383	0.818863	0.987162	0.0700279	2.14183e-07
HOXC10	0.373869	1.8161e-07	0.108611	0.0140871	0.0591226	0.3564	0.463823	0.652093	0.00912241	0.427463	0.0637378	0.731102	0.451226	0.0184833	0.158383	2.15215e-07
ARAP2	7.48292e-09	0.708118	0.00506135	0.0771924	0.00795769	0.0570273	0.944713	0.845458	0.259272	0.0630543	0.235642	0.62371	0.517086	0.196178	0.872186	2.15771e-07
ZNF442	1.87394e-05	4.90413e-07	0.0189223	0.546045	0.190104	0.0719943	0.0453757	0.87478	0.402736	0.186535	0.283467	0.86019	0.671432	0.398425	0.637214	2.17221e-07
CD164	1.07211e-06	4.83102e-05	0.227295	0.0117635	0.00590084	0.729893	0.221505	0.371053	0.914414	0.406712	0.468937	0.56985	0.314679	0.119165	0.897972	2.19964e-07
HSPB1	0.00860686	2.47254e-06	0.0235762	0.00144007	0.037454	0.941432	0.212226	0.0878134	0.830273	0.0400793	0.81071	0.82392	0.995611	0.0372546	0.420585	2.20495e-07
VCP	0.00260112	3.0745e-06	0.00580414	0.453668	0.375625	0.00233157	0.0697886	0.861771	0.0870745	0.454882	0.0207721	0.809795	0.821991	0.409109	0.66714	2.2156e-07
PDGFRA	5.71385e-06	7.7973e-09	0.00913008	0.0802712	0.560948	0.702796	0.711498	0.653165	0.873174	0.326933	0.79569	0.701348	0.743829	0.597979	0.391751	2.21808e-07
DCBLD2	0.000187805	4.88811e-06	0.0070645	0.166926	0.0098782	0.0842893	0.153588	0.367765	0.764899	0.392681	0.233164	0.7668	0.254613	0.668792	0.361846	2.24009e-07
DRD4	4.91997e-06	0.153382	0.122964	0.058495	0.139736	0.508667	0.576744	0.0299069	0.160408	0.0282683	0.907237	0.0775765	0.11794	0.301266	0.00228157	2.27375e-07
PSEN2	0.00135919	0.0216698	1.81572e-05	0.510256	0.811367	0.00030367	0.109396	0.912543	0.998406	0.0864629	0.00146497	0.945106	0.663171	0.448064	0.728683	2.28761e-07
TP73	2.81897e-08	4.31811e-07	0.241726	0.170893	0.50974	0.369749	0.323793	0.652905	0.219124	0.588405	0.682891	0.909219	0.637139	0.21003	0.809525	2.28811e-07
PPP2R2C	1.1591e-11	0.29848	0.137142	0.114978	0.0432226	0.634865	0.305452	0.345857	0.782479	0.32901	0.789286	0.606389	0.47432	0.0368151	0.512546	2.29396e-07
PDCD11	1.06139e-05	8.92434e-09	0.156726	0.0952007	0.655354	0.432961	0.164834	0.0362631	0.910469	0.401991	0.823452	0.959292	0.830864	0.525178	0.579716	2.30209e-07
P2RX1	1.53554e-08	9.15531e-05	0.188807	0.264541	0.457429	0.949394	0.0689487	0.420377	0.891884	0.313267	0.463655	0.376189	0.690489	0.079612	0.0749183	2.32083e-07
ZNF184	5.6585e-07	1.64845e-05	0.0659133	0.00437058	0.21967	0.485517	0.910906	0.0584859	0.829316	0.553737	0.805154	0.932641	0.432663	0.0960539	0.814279	2.32787e-07
TADA2A	0.868859	1.34541e-06	0.026368	0.00239745	0.11769	0.528104	0.295999	0.0215568	0.155393	0.146047	0.242113	0.997882	0.321202	0.039479	0.08746	2.32823e-07
SPDEF	0.676483	9.00874e-05	0.00126989	0.957359	0.0180073	0.00203238	0.1395	0.731356	0.0841277	0.0153022	0.00656933	0.496318	0.419205	0.495937	0.740733	2.33362e-07
ZBTB33	0.0085585	2.94003e-09	0.274968	0.00369242	0.285091	0.995079	0.0325384	0.189991	0.531323	0.515717	0.15218	0.933077	0.932621	0.162704	0.680745	2.34485e-07
CSF2RB	0.00508585	1.02252e-09	0.102795	0.0178649	0.411469	0.712794	0.253468	0.785876	0.427324	0.476906	0.143196	0.480306	0.455508	0.0637107	0.795772	2.34959e-07
FPR1	0.490572	0.00021692	0.000155852	0.310614	0.17244	0.102104	0.176309	0.586507	0.6834	0.0143428	0.103311	0.716456	0.0165797	0.0264384	0.0615668	2.3766e-07
ALX4	1.0976e-07	9.00814e-07	0.108927	0.0732676	0.100588	0.272453	0.211072	0.592007	0.866732	0.564079	0.443399	0.863699	0.726268	0.842013	0.59678	2.38552e-07
FRAT1	1.64191e-05	0.255216	0.00117882	0.0795013	0.712772	0.00975761	0.131179	0.488401	0.602116	0.0150022	0.0576989	0.756515	0.0681661	0.422475	0.0929658	2.38622e-07
TBL1X	0.000703365	3.66438e-07	0.092389	0.1684	0.00412731	0.120192	0.215602	0.910593	0.312014	0.343941	0.197887	0.250096	0.764267	0.170603	0.689304	2.4012e-07
RNF14	0.00515474	7.03002e-11	0.160327	0.0108934	0.624658	0.348298	0.0294256	0.48889	0.491238	0.834006	0.441393	0.854759	0.781423	0.941353	0.851664	2.44872e-07
ZNF513	0.0507951	3.51755e-07	0.00638982	0.982768	0.865051	0.00284842	0.030129	0.547368	0.863081	0.103035	0.0105542	0.56947	0.159142	0.746563	0.671121	2.47043e-07
ANXA4	0.00360087	3.87149e-09	0.293273	0.202345	0.0411956	0.123716	0.0470294	0.934056	0.184374	0.651702	0.318621	0.183649	0.749115	0.271553	0.735813	2.47571e-07
OR51S1	0.0298266	2.84434e-09	0.033172	0.143558	0.420159	0.172451	0.23036	0.107222	0.470716	0.0540463	0.159058	0.857937	0.915526	0.121318	0.702856	2.48471e-07
APEX1	7.9379e-07	1.03896e-06	0.0456864	0.108919	0.476118	0.168601	0.979151	0.6174	0.716864	0.18154	0.549682	0.860177	0.218455	0.726558	0.101936	2.5048e-07
CSPG4	0.00121592	1.25641e-08	0.240957	0.0127274	0.0634082	0.523244	0.748829	0.912317	0.149712	0.751148	0.259807	0.353441	0.573474	0.0693451	0.455099	2.50649e-07
TAF13	0.0045272	0.000157476	0.0638184	0.0139774	0.179467	0.011014	0.082456	0.263482	0.439996	0.0812486	0.0468265	0.737552	0.517455	0.615122	0.0184927	2.50659e-07
ACTL6A	1.42074e-05	1.53355e-08	0.646677	0.00270596	0.204278	0.765382	0.916353	0.381462	0.458481	0.638399	0.693164	0.693022	0.38173	0.461324	0.385131	2.50856e-07
RAC3	0.000659767	8.25304e-12	0.274656	0.17935	0.608907	0.227955	0.370654	0.589066	0.390871	0.62573	0.532677	0.785387	0.651838	0.481546	0.77511	2.54014e-07
ARHGAP12	0.00197678	3.60735e-06	0.046779	0.0125827	0.0305777	0.616834	0.102646	0.187958	0.996896	0.189132	0.174839	0.357312	0.443199	0.0265431	0.958918	2.54514e-07
CORO1C	0.333266	1.08676e-08	0.0112183	0.389239	0.272066	0.00813563	0.0684963	0.984283	0.701513	0.163811	0.0313264	0.622294	0.337409	0.208328	0.548886	2.55403e-07
SH2B3	4.02136e-05	2.05541e-08	0.0236335	0.0156375	0.263785	0.736866	0.631858	0.599891	0.673237	0.245301	0.913797	0.284293	0.828998	0.622972	0.412474	2.56859e-07
ZNF175	0.000809735	1.28652e-09	0.0660787	0.290003	0.554301	0.0283081	0.0775036	0.636059	0.471617	0.458488	0.123891	0.90715	0.967154	0.855739	0.67149	2.59305e-07
GUCA1B	0.000140918	0.00674493	0.00118904	0.962339	0.464961	0.000282483	0.418797	0.940012	0.253809	0.1462	0.00230789	0.594294	0.520117	0.931655	0.150795	2.59803e-07
GPR82	4.17126e-05	2.29805e-09	0.137053	0.126196	0.687945	0.454541	0.658884	0.521792	0.262997	0.443429	0.320052	0.47581	0.429308	0.294322	0.526117	2.60899e-07
ARHGEF19	0.00654664	2.07226e-08	0.0213647	0.894085	0.633773	0.00791943	0.0381287	0.950242	0.499053	0.206683	0.0433665	0.267904	0.76909	0.502461	0.968037	2.61605e-07
PARP1	0.000765904	2.58657e-09	0.129625	0.0133194	0.608855	0.0896648	0.375154	0.0939675	0.981086	0.705033	0.378597	0.951752	0.97098	0.199613	0.665317	2.61865e-07
ADORA2A	7.93858e-07	2.4781e-05	0.299693	0.0291917	0.207012	0.0733947	0.607714	0.502711	0.844841	0.422628	0.217393	0.260257	0.69441	0.0809224	0.235161	2.633e-07
IL5	3.81135e-07	4.66523e-07	0.0771638	0.158809	0.586127	0.0324144	0.422791	0.986694	0.33135	0.586101	0.171192	0.88663	0.758993	0.930444	0.596376	2.64258e-07
KREMEN2	0.000838487	4.43008e-11	0.279204	0.0855611	0.843936	0.148006	0.14612	0.695166	0.462927	0.845772	0.218905	0.972331	0.960181	0.281923	0.844935	2.64436e-07
MCM7	0.00439808	8.77643e-10	0.306927	0.167985	0.845862	0.0107113	0.024162	0.333898	0.557113	0.967018	0.0673322	0.804115	0.901232	0.574191	0.98449	2.65756e-07
MIER3	2.38598e-07	0.220372	0.00855222	0.0647633	0.0142058	0.0176817	0.946134	0.0825145	0.365192	0.0678157	0.119001	0.93367	0.579385	0.281311	0.862101	2.69644e-07
DMAP1	1.99552e-08	0.000193778	0.101049	0.0735228	0.318783	0.48648	0.471177	0.127126	0.354225	0.245922	0.752142	0.666303	0.378659	0.200204	0.25003	2.69661e-07
OXSR1	4.75231e-09	0.0369182	0.0118031	0.144703	0.157695	0.13778	0.721295	0.207325	0.500675	0.0872507	0.392526	0.44875	0.771651	0.0520918	0.735389	2.70188e-07
HTATIP2	0.000136298	1.54098e-07	0.0144951	0.405086	0.077009	0.0637436	0.0837977	0.977718	0.427742	0.325464	0.23276	0.3938	0.881972	0.569759	0.699555	2.71051e-07
RRAS	0.000798484	4.33026e-07	0.0173494	0.0123677	0.350624	0.924437	0.160423	0.0252987	0.908201	0.19871	0.405612	0.910731	0.558261	0.0985513	0.626889	2.72642e-07
ETV1	0.0115596	3.65984e-08	0.00502426	0.114696	0.0356874	0.137436	0.130184	0.322516	0.593403	0.464012	0.259532	0.998169	0.130643	0.859191	0.563622	2.74432e-07
E2F5	3.33753e-06	1.90703e-07	0.363534	0.00696457	0.0457076	0.967082	0.861057	0.251155	0.894402	0.354822	0.962914	0.655219	0.40761	0.568617	0.319389	2.75891e-07
GPSM1	0.000152594	0.00214227	0.00490846	0.0274564	0.000998194	0.881426	0.437075	0.837591	0.712562	0.036896	0.248604	0.336382	0.247806	0.11313	0.262668	2.77058e-07
DNMT3B	0.0774057	1.31389e-12	0.684935	0.0304669	0.433206	0.324463	0.100288	0.176477	0.887614	0.927453	0.395896	0.675253	0.749513	0.516087	0.511371	2.77135e-07
PPP1CB	0.0110726	1.91865e-09	0.292124	0.0387283	0.408358	0.0174691	0.0198273	0.92686	0.246736	0.871682	0.10653	0.530321	0.732202	0.907801	0.915404	2.79705e-07
GATA6	0.0473898	2.21319e-08	0.029538	0.413364	0.00486247	0.135485	0.0301527	0.971595	0.341077	0.239622	0.503969	0.356711	0.205279	0.344332	0.912187	2.80683e-07
HOXB9	7.46537e-05	9.11982e-08	0.613653	0.020798	0.307349	0.246173	0.242741	0.502645	0.548446	0.14984	0.572947	0.731767	0.382604	0.7399	0.0300148	2.81252e-07
TBX3	0.018951	6.19774e-10	0.21055	0.0239756	0.00404211	0.611651	0.0982928	0.799102	0.751489	0.291226	0.920601	0.774963	0.495808	0.362059	0.751087	2.87406e-07
PSEN1	6.19877e-07	1.42282e-06	0.187081	0.267699	0.0286046	0.341031	0.106797	0.907926	0.22083	0.33009	0.56981	0.637382	0.995683	0.583418	0.378188	2.87898e-07
EPAS1	5.58172e-08	1.56294e-07	0.132711	0.0258541	0.609763	0.800115	0.422985	0.889644	0.75084	0.787787	0.888344	0.882888	0.862633	0.141409	0.785997	2.89063e-07
ARHGEF26	3.51734e-06	1.71723e-06	0.332197	0.0873748	0.166162	0.0483424	0.0286558	0.824644	0.318845	0.823317	0.1252	0.712307	0.874209	0.451145	0.80948	2.9252e-07
LPAR5	1.68054e-05	2.61795e-05	0.0669759	0.317658	0.000845565	0.761388	0.198252	0.965925	0.126878	0.0951296	0.529646	0.648551	0.897433	0.145345	0.401096	2.93797e-07
SPRY1	0.000406938	3.77418e-08	0.0478486	0.00125888	0.35947	0.600869	0.90526	0.930393	0.230163	0.615479	0.745951	0.856503	0.277722	0.0828158	0.716538	2.94374e-07
STK36	0.920994	4.72688e-07	0.0042408	0.0111111	0.812555	0.799604	0.0902824	0.0985861	0.904607	0.133749	0.144001	0.756291	0.064995	0.0307501	0.0810143	2.9602e-07
HMGA1	1.84138e-06	1.38246e-08	0.249157	0.260437	0.455534	0.198951	0.177193	0.433026	0.202887	0.679047	0.498294	0.996379	0.946466	0.511766	0.665366	2.96124e-07
IL1A	0.00473783	9.07142e-05	0.696167	0.0486656	0.214706	0.0144688	0.100636	0.815869	0.0692849	0.152674	0.0270828	0.914548	0.0183985	0.803884	0.0177712	2.98152e-07
FAT1	3.61112e-08	0.00522518	0.0159781	0.0344831	0.361142	0.203297	0.0846805	0.113488	0.991364	0.144059	0.50007	0.76367	0.836601	0.119327	0.640442	2.98162e-07
NONO	6.23645e-06	2.86181e-09	0.235541	0.0820657	0.892421	0.204046	0.218509	0.364266	0.637006	0.512074	0.544435	0.90295	0.892068	0.516665	0.694367	2.98827e-07
TEAD3	0.000817322	1.24318e-05	0.179421	0.012753	0.00553024	0.136356	0.417817	0.671263	0.305687	0.367587	0.347983	0.562606	0.245389	0.0263237	0.37013	3.00426e-07
MNDA	0.0261969	1.23417e-09	0.015023	0.0600581	0.65568	0.864058	0.266003	0.708596	0.748591	0.13082	0.119355	0.319641	0.434139	0.066926	0.765922	3.00726e-07
YWHAG	9.20363e-08	1.14717e-06	0.846943	0.0525076	0.688589	0.541069	0.106172	0.168598	0.377193	0.621803	0.853406	0.884156	0.596323	0.365529	0.214927	3.01215e-07
BRCA1	0.000460428	2.14757e-08	0.0917618	0.00613834	0.406518	0.919603	0.33282	0.0404482	0.864901	0.577018	0.443221	0.791189	0.776571	0.078772	0.876992	3.04015e-07
BHLHA15	0.000295438	0.937764	0.00409514	0.691081	0.78963	3.44048e-06	0.641673	0.268359	0.644439	0.548218	5.72955e-05	0.249435	0.755592	0.299974	0.631123	3.05411e-07
PRKCE	1.50767e-09	1.14461e-05	0.494765	0.0186259	0.331339	0.95222	0.90921	0.303552	0.761944	0.632547	0.951545	0.919396	0.336046	0.399897	0.338338	3.05844e-07
NIF3L1	3.02201e-05	1.86767e-08	0.418262	0.00344073	0.260242	0.305116	0.793775	0.801544	0.586229	0.829152	0.389323	0.53292	0.647392	0.157558	0.641648	3.10062e-07
ZNF8	0.000110501	3.20319e-06	0.0150245	0.259579	0.227111	0.0302648	0.150678	0.433053	0.506608	0.234488	0.118786	0.901247	0.610326	0.0701518	0.809153	3.11566e-07
IRX2	0.00113759	1.27254e-05	0.115081	0.243102	0.569494	0.000385018	0.429248	0.466549	0.479127	0.652398	0.00025292	0.771107	0.316063	0.993082	0.805754	3.1266e-07
MET	2.58368e-09	3.45482e-05	0.60058	0.0906388	0.306452	0.640484	0.100919	0.591853	0.208393	0.672091	0.630311	0.801555	0.664971	0.231833	0.446286	3.15103e-07
BCLAF1	8.2925e-05	0.000265038	0.00604215	0.00514071	0.0867331	0.14253	0.955489	0.0328404	0.566556	0.142799	0.306757	0.927191	0.744008	0.0990904	0.622432	3.16878e-07
CCL15	0.000193066	2.61113e-07	0.161784	0.0146342	0.597712	0.797019	0.113039	0.0414962	0.491325	0.69207	0.208319	0.859204	0.599881	0.0326579	0.88272	3.17719e-07
MRGPRD	1.16193e-05	1.04637e-05	0.0544148	0.313928	0.129197	0.0108488	0.216669	0.989451	0.0688844	0.398321	0.0793672	0.853251	0.871814	0.421444	0.661027	3.18436e-07
ZUP1	0.000192426	2.69127e-06	0.0670638	0.0016966	0.0636668	0.465006	0.859689	0.028655	0.964791	0.418514	0.415974	0.87568	0.687721	0.162385	0.401334	3.19705e-07
NFKBIZ	0.0209307	1.22372e-07	0.0101046	0.0557876	0.0375417	0.0804022	0.333317	0.626102	0.266642	0.135975	0.10004	0.759767	0.340794	0.640096	0.518333	3.19793e-07
RUNX2	0.0192013	5.65478e-06	5.27729e-05	0.154104	0.0403665	0.759673	0.868	0.93644	0.690408	0.0156825	0.569751	0.355864	0.162657	0.320059	0.113299	3.21024e-07
F10	9.51096e-14	0.0689894	0.119802	0.497205	0.442946	0.720275	0.62569	0.514946	0.704496	0.338476	0.923538	0.329548	0.8917	0.278288	0.396118	3.22265e-07
DLX4	0.000120859	3.71875e-09	0.894572	0.0397961	0.535075	0.172625	0.264352	0.585768	0.212162	0.776495	0.282176	0.844911	0.496134	0.111331	0.583506	3.24634e-07
EPHA5	0.000924369	3.09001e-11	0.378725	0.271013	0.603303	0.108048	0.173646	0.779355	0.442278	0.713543	0.223666	0.492127	0.563851	0.582287	0.994503	3.27408e-07
BAK1	3.4913e-05	4.70767e-07	0.028274	0.579769	0.35091	0.0234248	0.0521169	0.704296	0.377103	0.310799	0.12231	0.917685	0.702728	0.675349	0.595818	3.34266e-07
PAX2	0.000206956	0.102219	0.00120974	0.865997	0.0202252	0.221416	0.728004	0.624924	0.0732457	0.00107206	0.296677	0.0238261	0.650177	0.783177	0.0237862	3.35144e-07
LDB1	1.99686e-05	2.55016e-05	0.208298	0.00906563	0.0040781	0.655796	0.60382	0.371805	0.415904	0.336741	0.491211	0.241594	0.644104	0.0647119	0.767386	3.37685e-07
RPH3AL	0.36507	3.45675e-06	0.000216667	0.540649	0.185193	0.00198142	0.463169	0.81529	0.370935	0.0803915	0.0194754	0.286567	0.423465	0.323455	0.66471	3.40264e-07
NLRC3	0.000265872	1.69149e-06	0.00765045	0.0401497	0.749346	0.154772	0.38745	0.670782	0.50261	0.0716411	0.185338	0.256406	0.530414	0.4842	0.169696	3.40365e-07
ZSCAN4	1.04813e-05	0.00787461	0.0431281	0.00788499	0.00324894	0.572836	0.0406993	0.899261	0.325094	0.146585	0.58631	0.999699	0.360673	0.0283112	0.570578	3.40822e-07
SH2D1A	0.00487501	4.47822e-09	0.0434347	0.199371	0.522848	0.322471	0.171274	0.864138	0.51027	0.0672726	0.0925091	0.556903	0.591803	0.138307	0.467306	3.46764e-07
SMPD1	0.00131165	1.49268e-05	0.000793391	0.0047914	0.121514	0.152841	0.873729	0.199657	0.551191	0.161034	0.308428	0.921834	0.908392	0.0844757	0.684732	3.47238e-07
ZNF275	0.0029253	1.69328e-09	0.0699502	0.15639	0.0119883	0.655715	0.599362	0.948257	0.143682	0.145258	0.77455	0.518461	0.681265	0.416418	0.557582	3.4813e-07
FAM13B	1.90097e-05	1.46066e-08	0.0580922	0.214841	0.575377	0.0749694	0.376568	0.874785	0.3631	0.297425	0.324944	0.818247	0.515568	0.980294	0.454162	3.50786e-07
IRS4	3.68223e-06	0.000314824	0.0097026	0.0333756	0.0449961	0.992716	0.0176783	0.247113	0.668913	0.419041	0.38873	0.788938	0.469642	0.143147	0.77515	3.53434e-07
PKN1	0.0109622	3.44122e-05	0.0171599	0.00656939	0.00398178	0.0990421	0.341095	0.254498	0.863652	0.139375	0.0618879	0.727656	0.944406	0.0647705	0.681622	3.54078e-07
NKX2-3	2.45537e-07	4.45618e-07	0.459626	0.0257452	0.848703	0.575369	0.658475	0.126008	0.965536	0.435221	0.655832	0.576715	0.650705	0.498888	0.125315	3.61488e-07
PER3	0.000239899	1.23232e-10	0.615604	0.155807	0.749231	0.110817	0.170226	0.838854	0.485228	0.698398	0.403077	0.609483	0.324535	0.714957	0.531489	3.65804e-07
VGLL1	2.8499e-06	0.00259551	0.526297	0.585692	0.0794541	0.0221302	0.29087	0.0363137	0.0105684	0.703382	0.015148	0.340602	0.940797	0.316568	0.718234	3.67441e-07
INPP4A	5.13218e-06	3.00966e-08	0.0176361	0.108514	0.106046	0.451657	0.92779	0.840779	0.820136	0.269564	0.790974	0.613698	0.885781	0.569056	0.583709	3.68381e-07
KHDRBS1	7.5434e-08	5.66512e-08	0.301616	0.062523	0.513393	0.689408	0.292953	0.229354	0.669762	0.81221	0.908182	0.973856	0.965721	0.45745	0.857827	3.68883e-07
ZNF154	2.51649e-07	2.79494e-06	0.0593652	0.332236	0.61804	0.0273418	0.238163	0.919138	0.498746	0.514915	0.154056	0.756154	0.671492	0.867645	0.393903	3.70953e-07
KEL	1.04682e-05	4.88247e-07	0.00705842	0.572815	0.255932	0.425644	0.0688972	0.268586	0.660772	0.33895	0.79997	0.981594	0.200505	0.682864	0.353954	3.72916e-07
FANCG	1.4295e-05	5.90222e-10	0.290824	0.139374	0.696884	0.0849414	0.3583	0.400561	0.671225	0.91365	0.366503	0.997629	0.965671	0.688284	0.826635	3.74982e-07
SMAD6	0.295298	1.81257e-06	0.0383532	0.904543	0.589843	0.0069342	0.00984868	0.176655	0.698601	0.0528508	0.0473846	0.591743	0.0837574	0.441801	0.0707464	3.75108e-07
GRIK2	0.000792561	1.01247e-07	0.0583568	0.0780112	0.0733772	0.127884	0.0466397	0.424041	0.570531	0.295184	0.135223	0.873185	0.453302	0.676623	0.866641	3.75274e-07
PDE1C	1.63842e-08	1.83494e-07	0.834464	0.104467	0.698504	0.26127	0.352639	0.66138	0.428604	0.895391	0.524286	0.994861	0.423303	0.625624	0.606131	3.75332e-07
CD34	0.000500671	4.54601e-09	0.204452	0.00332082	0.349182	0.964888	0.749914	0.903549	0.769209	0.475381	0.300486	0.447632	0.654351	0.104721	0.304331	3.7777e-07
ZNF43	8.20288e-07	8.71957e-07	0.0565828	0.469173	0.748141	0.457557	0.196422	0.831985	0.721071	0.210209	0.153366	0.790341	0.636607	0.229251	0.128371	3.80446e-07
KMT5A	6.85481e-09	3.93336e-06	0.123047	0.0896388	0.747286	0.27178	0.582955	0.754882	0.317163	0.436567	0.52346	0.93327	0.69249	0.921048	0.319209	3.80745e-07
SMC3	0.000335155	0.0583369	0.000118542	0.0286732	0.228803	0.000887629	0.535767	0.210644	0.356386	0.269661	0.00582014	0.955386	0.931115	0.534364	0.908596	3.82109e-07
ASMTL	0.0717327	2.07381e-06	0.0588426	0.00576771	0.00911137	0.907196	0.170906	0.0315242	0.806978	0.136247	0.204477	0.497495	0.649359	0.0389253	0.579423	3.82336e-07
DGKQ	0.0159969	1.25914e-08	0.0715915	0.283402	0.187379	0.354467	0.00190253	0.187587	0.733071	0.108545	0.673495	0.857441	0.230542	0.87733	0.40994	3.82895e-07
ASB9	2.69389e-07	0.0699155	0.0371299	0.650264	0.101243	0.0037841	0.169875	0.554997	0.349254	0.0562981	0.00595026	0.525379	0.905689	0.864918	0.46801	3.83638e-07
ITGB3	1.73694e-05	8.95895e-09	0.175289	0.0158691	0.247565	0.675003	0.8187	0.920608	0.250997	0.771757	0.515927	0.791698	0.794655	0.15483	0.699313	3.84348e-07
RASAL1	0.126877	0.00134845	0.00187582	0.604511	0.00327646	0.0328256	0.137575	0.660548	0.0144405	0.0111418	0.0474021	0.773257	0.409089	0.134413	0.60463	3.8479e-07
CD33	0.187409	4.16563e-09	0.0140105	0.162159	0.136924	0.517813	0.497083	0.614175	0.972923	0.20151	0.0316889	0.184586	0.125647	0.0824611	0.817605	3.85627e-07
ATIC	2.18787e-06	2.12058e-09	0.447011	0.113684	0.826057	0.186536	0.339401	0.511139	0.589639	0.870391	0.555349	0.931536	0.698986	0.442617	0.725585	3.87506e-07
AIFM2	1.25913e-05	1.58498e-05	0.00325712	0.217838	0.127299	0.843988	0.656562	0.861537	0.300483	0.00685982	0.875568	0.967903	0.984506	0.777036	0.0328519	3.89014e-07
RGS10	0.443644	1.8814e-09	0.393991	0.00998748	0.896601	0.61827	0.0132672	0.136792	0.941111	0.49823	0.108395	0.846173	0.195277	0.0271186	0.505318	3.90755e-07
FLYWCH1	0.00652651	3.77936e-06	0.231429	0.00239831	0.00374026	0.800052	0.45895	0.0850302	0.516516	0.161076	0.600433	0.462823	0.370455	0.102122	0.272281	3.91093e-07
[truncated: 3,730 more rows]
