# Supplementary material for: Gene Regulatory Network Characterization of Gastric Cancer’s Histological Subtypes: Distinctive Biological and Clinically Relevant Master Regulators
Source: Cancers (Basel). 2022 Oct 10;14(19):4961. doi: 10.3390/cancers14194961 (PMC9563962; doi:10.3390/cancers14194961)
Supplement: Supplementary file 1 [file cancers-14-04961-s001.zip › FileS6.xlsx]

## Sheet: OS
row.names	HR	low	high	microsatellite	DiffuseVsIntestinal	pathologic_T	ageD	anatomic_JGCA	gender	pathologic_stage	anatomic	pathologic_N
CGB5	1.79	1.26928	2.52285	0.0740212	0.197852	0.0334081	0.874773	0.968059	0.298966	0.0114568	0.640474	0.770544
CYP26B1	1.61	1.15244	2.25163	0.206229	0.306427	0.415902	0.945487	0.410119	0.771519	0.097531	0.391104	0.779608
WT1	1.59	1.0576	2.40541	0.00421255	0.767044	0.000443634	0.639452	0.209209	0.822779	0.00439367	0.304154	0.794771
SNAI2	1.51	1.16792	1.96499	0.451618	5.89244e-07	8.28932e-06	0.145015	0.682151	0.843191	0.0115418	0.383093	0.992505
ANKRD1	1.5	1.03136	2.18859	0.385018	0.0550163	0.00676233	0.600129	0.58975	0.3366	0.0442943	0.891959	0.952534
WNT5A	1.47	1.08243	1.98992	0.233077	0.76048	0.0641051	0.6688	0.491711	0.362871	0.243505	0.70349	0.753799
SRGAP1	1.47	1.04621	2.05698	0.00971341	0.33707	0.00617399	0.424689	0.853606	0.0809542	0.10404	0.51625	0.338123
PDPN	1.46	1.12967	1.89664	0.274074	6.69933e-05	4.95033e-06	0.0489564	0.995659	0.744486	0.00413398	0.407976	0.790982
PRRX1	1.46	1.12169	1.90444	0.0991562	3.176e-09	7.87274e-08	0.0945423	0.095512	0.466686	0.000769527	0.0802744	0.935854
ANTXR1	1.46	1.11075	1.90804	0.280773	6.29127e-08	5.06354e-07	0.091948	0.273651	0.832782	0.0022246	0.229295	0.978631
PDGFRB	1.46	1.11282	1.91379	0.0537032	3.85235e-07	1.09057e-05	0.0230028	0.777837	0.749163	0.00797567	0.316413	0.655934
CLEC5A	1.46	1.01058	2.09914	0.000939953	0.423642	0.0543593	0.808514	0.299113	0.176543	0.053265	0.465042	0.853057
ITGA11	1.46	1.08701	1.95437	0.380539	5.91019e-05	1.50203e-07	0.0549658	0.841297	0.730456	0.000760382	0.343666	0.76426
MAP4K4	1.45	1.03821	2.02122	0.000107286	0.028903	1.9447e-05	0.582552	0.702323	0.763468	0.00266472	0.779848	0.31656
RUNX2	1.44	1.07996	1.91107	0.0192013	5.65478e-06	5.27729e-05	0.154104	0.759673	0.868	0.0156825	0.569751	0.355864
INHBA	1.44	1.06654	1.93969	0.378189	7.96883e-05	2.9525e-06	0.102674	0.335459	0.803499	0.00284816	0.195144	0.951099
LEF1	1.43	1.08726	1.88319	1.13063e-05	8.52998e-06	0.000101969	0.0600724	0.975732	0.905482	0.0235946	0.402171	0.364815
LOXL2	1.43	1.08642	1.8883	0.693095	0.0081245	0.00189179	0.137718	0.48698	0.302124	0.103744	0.424271	0.982637
PDE10A	1.42	1.05742	1.91553	0.0110121	6.86916e-11	0.000110764	0.0308108	0.17329	0.349521	0.0357674	0.205561	0.762767
COL1A1	1.42	1.06071	1.91146	0.93043	0.00148605	0.000393516	0.10908	0.680757	0.428099	0.0215957	0.41573	0.943355
TBX15	1.41	1.1344	1.75575	0.0184854	0.437426	0.021855	0.691702	0.357251	0.824574	0.00504994	0.55679	0.768621
ZNF469	1.41	1.04441	1.89219	0.945278	0.00193986	0.000577656	0.0742458	0.96403	0.327034	0.0531712	0.282088	0.844294
CNIH3	1.4	1.11507	1.75673	0.00461937	0.000211816	1.28957e-06	0.148927	0.507139	0.500468	0.000347818	0.322242	0.170602
SOX11	1.4	1.03751	1.886	0.632158	0.00231714	0.000147041	0.201589	0.251199	0.814895	0.0605255	0.419445	0.72499
HRH1	1.4	1.00351	1.95196	0.114206	0.0497786	0.0287143	0.78569	0.156085	0.596614	0.0095369	0.287884	0.939909
TNFAIP6	1.39	1.0613	1.81814	0.545497	0.000846049	0.000302338	0.520914	0.609015	0.962575	0.0296871	0.295239	0.906631
EDNRA	1.39	1.12091	1.72038	0.0178201	1.29239e-08	0.000165746	0.0918975	0.404107	0.675572	0.182508	0.242354	0.859083
ZNF365	1.38	1.05705	1.81209	0.00234775	2.58349e-05	1.63511e-05	0.181205	0.208692	0.247902	0.00542188	0.23727	0.867716
THY1	1.38	1.07389	1.76868	0.0356206	6.35581e-08	1.57337e-05	0.0114343	0.959489	0.77202	0.0045885	0.147606	0.947351
SPOCK1	1.37	1.07308	1.75291	0.259925	2.41389e-07	4.71139e-07	0.139546	0.0840441	0.471984	0.00244077	0.0751797	0.97005
MMP14	1.37	1.02543	1.84115	0.999718	0.0315094	0.00025437	0.103435	0.436346	0.255226	0.0311246	0.417962	0.84611
F2R	1.36	1.02736	1.8001	0.000584334	4.49036e-07	0.000353453	0.0690815	0.817675	0.909412	0.112286	0.467197	0.408858
LZTS1	1.36	1.05098	1.75761	0.00300583	1.11676e-08	6.58932e-06	0.0491351	0.272423	0.765013	0.0188263	0.23826	0.702036
CGB8	1.36	1.05117	1.74929	0.0454083	0.0233532	0.831934	0.485624	0.783517	0.805616	0.659761	0.0627603	0.832978
RPE65	1.35	1.04716	1.75329	0.000396447	0.0261587	0.131492	0.5238	0.490627	0.168966	0.354769	0.905704	0.854508
EN1	1.35	1.08321	1.68705	0.020297	0.000175487	0.000387089	0.105279	0.820845	0.190759	0.0115804	0.241424	0.484576
EREG	1.35	1.0272	1.7774	0.204977	0.00918549	0.336887	0.273117	0.718977	0.932916	0.0183921	0.334499	0.501303
RASGRF2	1.35	1.06533	1.7094	0.00124464	6.55731e-08	0.0318439	0.0307249	0.74126	0.741249	0.418779	0.79438	0.7822
GPR85	1.35	1.05291	1.71919	0.0176712	2.69739e-05	1.82158e-05	0.326778	0.637151	0.758481	0.00221969	0.847955	0.208863
CDH13	1.35	1.03283	1.76307	0.129578	0.0201495	0.0630971	0.0914631	0.411263	0.457271	0.611725	0.761045	0.665315
NTSR1	1.35	1.03917	1.74089	0.00715671	0.100632	0.0419077	0.417003	0.040347	0.256452	0.448531	0.179037	0.525154
GPR1	1.34	1.06006	1.70239	0.0836367	3.34808e-07	2.40252e-07	0.0466104	0.193863	0.448054	0.000198301	0.377452	0.767529
ARL4C	1.34	1.05566	1.69331	0.593915	2.1368e-07	1.10282e-06	0.0418289	0.679411	0.749845	0.00160436	0.107138	0.948312
CRABP2	1.33	1.01064	1.75434	5.44653e-05	0.418415	0.0894304	0.235188	0.305489	0.356735	0.0248986	0.681728	0.148852
SELE	1.33	1.04367	1.70307	0.323362	1.1886e-07	0.00736978	0.0730234	0.763804	0.650803	0.135923	0.640363	0.889641
RAPGEF4	1.33	1.0343	1.70085	6.08377e-12	0.00144224	0.146803	0.165184	0.360485	0.691637	0.425193	0.573947	0.751958
RGS20	1.33	1.05839	1.66339	1.35745e-07	0.660599	0.0749133	0.670283	0.182944	0.62623	0.107647	0.00729831	0.329497
NOTCH3	1.33	1.00537	1.74838	0.00398602	0.0298216	0.0130314	0.0549283	0.82362	0.140599	0.536875	0.959859	0.590583
FPR3	1.33	1.00407	1.77479	0.446379	1.82161e-05	0.00413225	0.244956	0.74707	0.634963	0.0480943	0.26037	0.0681753
PTH2R	1.32	1.0646	1.63082	4.9298e-09	0.0122234	0.194766	0.324473	0.471803	0.294065	0.16884	0.756367	0.1891
TBX18	1.32	1.05167	1.65791	0.0631197	9.76346e-10	4.26705e-05	0.0721519	0.140237	0.22515	0.0135348	0.211242	0.935524
ARHGEF2	1.31	1.07028	1.59767	1.29693e-05	5.36574e-08	0.000697082	0.0104072	0.96704	0.772304	0.0328025	0.594283	0.469407
ACKR3	1.31	1.05234	1.62018	0.011897	3.03051e-08	0.0010044	0.0185092	0.784642	0.774572	0.107381	0.721047	0.897173
GRM2	1.31	1.04049	1.66071	0.000442871	0.000157303	0.578842	0.0483466	0.832922	0.7479	0.720109	0.940366	0.47821
PLCXD3	1.31	1.00657	1.70295	4.23231e-06	1.05802e-10	0.0338108	0.0575239	0.476059	0.0614607	0.529491	0.651341	0.937837
ADRA1A	1.31	1.02688	1.65975	1.26302e-05	1.96074e-11	0.0125791	0.0377074	0.287658	0.169502	0.295843	0.270442	0.844416
ITGBL1	1.31	1.04344	1.64852	0.0046353	2.708e-08	5.71711e-08	0.0742483	0.235946	0.563624	0.0010708	0.257189	0.4668
GPR176	1.31	1.0258	1.66669	0.000184526	0.000388036	0.0270768	0.014183	0.120496	0.256724	0.495198	0.402694	0.40179
ALDH1A2	1.31	1.05408	1.63222	9.30617e-05	9.98529e-07	0.0110756	0.0752754	0.10186	0.0236704	0.263808	0.288926	0.945242
ZNF521	1.31	1.0769	1.6021	0.000237475	9.38841e-12	0.000511572	0.00566598	0.310472	0.411809	0.109271	0.302086	0.869745
C5AR1	1.31	1.03272	1.65302	0.43725	4.05123e-06	0.00552779	0.0899268	0.279121	0.644182	0.121378	0.114532	0.574903
NLRP12	1.31	1.06444	1.61271	5.62614e-06	0.00110536	0.0501487	0.283057	0.519265	0.351679	0.261197	0.33805	0.707954
SNAI1	1.31	1.01864	1.67949	0.112144	0.0193962	0.00158639	0.182705	0.599793	0.919122	0.0112687	0.718549	0.731899
TCF23	1.3	1.07002	1.5769	3.04732e-07	9.89401e-09	0.0263776	0.00448367	0.130067	0.18474	0.390818	0.212929	0.934909
DNER	1.3	1.03932	1.63703	8.97764e-06	4.2588e-07	0.0450991	0.0284382	0.89874	0.0124238	0.370995	0.595509	0.947533
FSTL1	1.3	1.04236	1.61474	0.00676997	6.90817e-12	1.75219e-05	0.0193137	0.141063	0.465191	0.0275609	0.107916	0.936045
STC1	1.3	1.03814	1.61741	0.0182559	1.09978e-06	0.000397485	0.125965	0.418551	0.892253	0.0734003	0.780963	0.906278
ENPP2	1.3	1.04338	1.63093	5.2781e-06	1.28021e-10	0.0209533	0.0902963	0.840783	0.122051	0.125568	0.349104	0.290829
GLIS3	1.3	1.0612	1.5952	2.68587e-05	1.17468e-10	0.00116063	0.00960209	0.466917	0.415702	0.100355	0.424416	0.780337
GUCY1A2	1.3	1.02171	1.65505	0.000721512	0.000242382	0.0971933	0.0205217	0.53789	0.549715	0.881761	0.653043	0.608383
RAP1B	1.3	1.01592	1.66931	0.187987	3.08679e-11	0.0873845	0.076252	0.247831	0.00924292	0.569007	0.141937	0.361395
NTS	1.3	1.0353	1.63782	9.74154e-06	0.0194265	0.197542	0.670581	0.0639596	0.178783	0.519348	0.0436138	0.582761
DLL4	1.3	1.00605	1.68864	0.151103	0.976558	0.137635	0.0380116	0.2812	0.0300702	0.243298	0.498003	0.490644
RAB31	1.3	1.0312	1.63694	0.0293077	2.00508e-12	1.73053e-05	0.0508125	0.138932	0.291105	0.0271519	0.0653886	0.987912
TPM4	1.3	1.00597	1.68728	0.269659	0.0281841	0.00670216	0.213048	0.27155	0.988122	0.0399243	0.46429	0.855426
GPR34	1.3	1.02722	1.63491	0.0107725	3.22295e-10	0.0815226	0.342691	0.561911	0.386454	0.336169	0.458086	0.401235
ACVR1	1.29	1.03913	1.61198	0.000156188	1.4545e-08	0.0279478	0.00317769	0.9313	0.867009	0.277293	0.611616	0.341512
KDR	1.29	1.03605	1.5984	0.000579031	0.000891677	0.692607	0.0176551	0.224261	0.385144	0.494614	0.503247	0.688482
EDN1	1.29	1.01401	1.64274	3.47709e-05	0.000429809	0.0218316	0.436209	0.368436	0.271344	0.290806	0.522838	0.621769
CAV2	1.29	1.07084	1.55526	0.0192219	1.48543e-10	0.000353887	0.150445	0.094023	0.0267905	0.1595	0.147211	0.917854
MS4A4A	1.29	1.02852	1.61806	0.158313	2.43365e-08	0.0130449	0.388927	0.439449	0.142328	0.0269365	0.251941	0.179731
FGF3	1.29	1.01812	1.63485	0.00915478	0.000533928	0.18761	0.129133	0.362641	0.932026	0.253995	0.80497	0.712768
DACT1	1.29	1.05229	1.58297	0.000440274	9.90005e-11	2.77987e-06	0.00780426	0.11557	0.34864	0.0058152	0.0826295	0.759955
BDKRB1	1.29	1.02733	1.62059	1.67934e-05	3.80216e-09	0.000233573	0.0901645	0.434485	0.0533468	0.00812984	0.856954	0.690674
EFNB3	1.29	1.0443	1.59723	4.24567e-05	0.012034	0.00677805	0.0476762	0.606122	0.709331	0.0985721	0.902995	0.639721
FSTL3	1.29	1.02593	1.62172	0.612252	0.00140522	1.70682e-05	0.0211598	0.89875	0.371303	0.000872829	0.39187	0.780874
CD33	1.29	1.01283	1.63124	0.187409	4.16563e-09	0.0140105	0.162159	0.517813	0.497083	0.20151	0.0316889	0.184586
PDGFRA	1.28	1.04039	1.56942	5.71385e-06	7.7973e-09	0.00913008	0.0802712	0.702796	0.711498	0.326933	0.79569	0.701348
EYA4	1.28	1.0549	1.55002	0.000172064	6.35002e-11	5.54476e-06	0.0348294	0.102924	0.182902	0.0119023	0.112036	0.817732
CALCR	1.28	1.03826	1.56699	2.03422e-07	1.06301e-05	0.00115128	0.49652	0.628452	0.292748	0.0132499	0.945238	0.796991
RGS22	1.28	1.05449	1.56219	5.82539e-06	4.96655e-11	0.000257991	0.0208382	0.178638	0.108523	0.0763693	0.242059	0.881958
DMRT3	1.28	1.01784	1.61748	0.199716	0.313348	0.00520077	0.918437	0.147726	0.774647	0.00357796	0.53313	0.497628
NFIL3	1.28	1.02035	1.61495	0.0416229	3.12792e-06	0.00247144	0.431703	0.634508	0.15925	0.0550007	0.909511	0.925381
DKK1	1.28	1.02514	1.59859	3.09717e-10	0.0888221	0.0514258	0.011987	0.0483971	0.817758	0.0599289	0.135482	0.105545
FLT1	1.28	1.01854	1.61485	0.00388661	0.0274391	0.23161	0.0173103	0.322683	0.156494	0.492514	0.678609	0.522773
FOXC2	1.28	1.04121	1.56626	8.44074e-05	1.83971e-08	0.000193158	0.0102409	0.666807	0.659747	0.0431628	0.513376	0.794816
C5AR2	1.28	1.01934	1.61813	0.000134967	0.000765013	0.00413235	0.0367255	0.0648793	0.434467	0.427322	0.295219	0.615635
DOK5	1.28	1.04792	1.5552	0.000338387	1.1838e-11	1.37737e-05	0.00170432	0.369677	0.493246	0.00719754	0.216921	0.743679
RCAN1	1.28	1.03696	1.59049	0.00570317	1.36434e-10	0.136219	0.0389377	0.86847	0.483213	0.72297	0.192294	0.867326
HEYL	1.27	1.01209	1.58443	3.14229e-05	1.84074e-09	5.38844e-05	0.0242347	0.241979	0.353237	0.0620452	0.113971	0.776669
GLI2	1.27	1.01763	1.57604	0.000980224	4.43025e-10	0.00131397	0.0118178	0.251103	0.601382	0.182607	0.302575	0.797564
LMCD1	1.27	1.04033	1.54813	8.16889e-05	5.03383e-10	8.36187e-05	0.0108046	0.894535	0.488224	0.0119848	0.445949	0.732301
VGLL3	1.27	1.04081	1.54699	0.00307198	7.31525e-13	2.46903e-05	0.0193192	0.0950359	0.259793	0.036255	0.0863988	0.929826
MGLL	1.27	1.01644	1.57619	0.0468558	0.0148301	0.326462	0.404597	0.886171	0.825589	0.76668	0.95511	0.759913
FST	1.27	1.02532	1.57594	8.92899e-06	2.59483e-10	0.00458654	0.00516545	0.876242	0.0990631	0.207877	0.537306	0.97666
ZNF300	1.27	1.01627	1.59363	3.63286e-13	2.15102e-07	0.0294763	0.00766118	0.897717	0.465677	0.2451	0.954116	0.564086
POU3F2	1.27	1.05001	1.53211	7.8271e-06	0.221112	0.015807	0.973604	0.535725	0.292479	0.0169687	0.85276	0.341479
EBF2	1.27	1.03849	1.54199	0.000571297	1.03496e-10	0.000676949	0.0268588	0.105923	0.217668	0.35048	0.18002	0.742091
PLAT	1.27	1.01622	1.59068	1.0921e-07	1.24948e-08	0.00481834	0.00293442	0.721667	0.697406	0.204663	0.754848	0.482446
OR51E2	1.27	1.00238	1.61972	3.27521e-05	5.86073e-06	0.000108783	0.196313	0.718771	0.626164	0.0228452	0.343806	0.926527
MS4A14	1.27	1.00805	1.58951	0.0128631	7.02529e-11	0.0127561	0.165137	0.290563	0.490979	0.151514	0.238048	0.201104
TENM4	1.27	1.03137	1.57613	0.0201835	1.59296e-11	2.62541e-08	0.0201177	0.238164	0.313365	0.000515795	0.0972432	0.639634
GDF3	1.27	1.04273	1.55421	1.61461e-06	1.04622e-06	0.00684969	0.0472376	0.181154	0.314764	0.274855	0.17186	0.904061
ITGA5	1.27	1.01452	1.58522	0.137456	1.25146e-07	0.00523695	0.0316248	0.173965	0.586841	0.258878	0.15052	0.66023
TGFB3	1.27	1.03748	1.55975	0.027028	5.33847e-14	0.000106207	0.016944	0.0685309	0.182199	0.0166844	0.0775852	0.892971
GPR68	1.27	1.04237	1.55574	0.00240612	1.70835e-11	9.72736e-05	0.01097	0.855037	0.345857	0.00607784	0.142403	0.452987
THBS1	1.27	1.01396	1.58275	0.0289381	1.05659e-10	4.48723e-06	0.0907319	0.244443	0.282287	0.00864307	0.235955	0.887645
GUCY2D	1.27	1.06058	1.52059	0.000632917	0.111098	0.767799	0.670458	0.0978635	0.75272	0.263264	0.409955	0.526596
PLEKHG2	1.27	1.01664	1.57423	5.01586e-07	1.19588e-10	0.000344265	0.0374076	0.292733	0.419108	0.0545321	0.400331	0.666086
MEIS3	1.27	1.04207	1.55859	0.00272893	1.25658e-09	2.18797e-05	0.00255111	0.390286	0.44469	0.00784771	0.211306	0.788649
FPR1	1.27	1.01957	1.584	0.490572	0.00021692	0.000155852	0.310614	0.102104	0.176309	0.0143428	0.103311	0.716456
RAB3B	1.26	1.01278	1.56218	4.70495e-05	0.089632	0.225206	0.296041	0.914472	0.77031	0.704235	0.975046	0.943729
CALCRL	1.26	1.00894	1.56857	0.00416791	1.33511e-07	0.026754	0.0972005	0.211181	0.681766	0.568927	0.436534	0.581249
CYTL1	1.26	1.0111	1.5585	0.00331292	5.67405e-10	0.00822031	0.0271078	0.86125	0.114071	0.1509	0.265885	0.894326
HOPX	1.26	1.03822	1.53875	0.00300852	6.83013e-11	3.46409e-05	0.00501848	0.380755	0.245832	0.00878172	0.406975	0.457767
ANXA5	1.26	1.01175	1.5669	0.213244	6.57913e-05	0.0529042	0.0450906	0.967	0.0821814	0.0337372	0.274402	0.441471
GPR63	1.26	1.01503	1.56492	0.00106689	0.00330152	0.00477353	0.495564	0.0369941	0.435621	0.0273094	0.126595	0.755599
ETV1	1.26	1.03668	1.53529	0.0115596	3.65984e-08	0.00502426	0.114696	0.137436	0.130184	0.464012	0.259532	0.998169
AEBP1	1.26	1.02757	1.54999	0.0171746	1.6306e-09	1.14826e-05	0.00864306	0.545683	0.645676	0.00617478	0.228322	0.859272
KLF9	1.26	1.01522	1.57622	0.000264973	6.82656e-10	0.0853369	0.130488	0.496733	0.295669	0.799637	0.628283	0.915431
GLI1	1.26	1.03268	1.53789	9.75426e-06	3.07191e-12	3.87859e-06	0.0320171	0.260674	0.316959	0.00356162	0.19797	0.310275
IRAK3	1.26	1.01233	1.5794	1.69621e-09	1.31669e-05	0.077259	0.147282	0.314969	0.513465	0.11996	0.751616	0.12085
HTR2A	1.26	1.03513	1.53662	1.40773e-06	8.39061e-12	0.000528326	0.00940425	0.212299	0.302534	0.0813964	0.336974	0.667669
FGF7	1.26	1.03807	1.52412	0.00201955	1.90226e-12	9.35802e-06	0.019059	0.0404677	0.151785	0.0141956	0.0411803	0.906112
CABYR	1.26	1.02162	1.56418	8.71052e-14	0.00308096	0.0023234	0.226915	0.875828	0.112728	0.00360901	0.626437	0.232371
ZNF826P	1.26	1.03282	1.53703	6.51114e-08	1.3044e-10	0.000427056	0.038105	0.618607	0.304425	0.0331073	0.238313	0.415473
TGFB1	1.26	1.0255	1.55436	0.000488483	2.03343e-09	0.00142409	0.00165368	0.529613	0.43815	0.0433174	0.335937	0.534588
NRK	1.26	1.03908	1.53649	0.00188282	4.3724e-10	2.38324e-06	0.0281362	0.0544551	0.242459	0.00402467	0.053888	0.759371
CHN1	1.25	1.0233	1.52293	3.01658e-05	2.42594e-10	0.00867867	0.0419261	0.551545	0.159231	0.153803	0.488684	0.731484
PDE1A	1.25	1.03143	1.5109	2.62977e-06	5.8486e-12	0.000371063	0.0580277	0.184784	0.138698	0.0710644	0.135976	0.665933
GHR	1.25	1.01809	1.5285	6.47712e-06	1.31419e-12	0.00506657	0.0221463	0.210285	0.100432	0.326421	0.26093	0.851443
PPIC	1.25	1.00057	1.56368	0.12888	0.397475	0.00865316	0.352907	0.478793	0.976401	0.0824585	0.657504	0.619519
ABLIM3	1.25	1.02924	1.52034	0.00078834	3.90045e-12	0.00267649	0.0151804	0.13781	0.120642	0.139948	0.332871	0.857367
ZNF311	1.25	1.00924	1.53853	2.73121e-07	3.95967e-13	0.0126474	0.0134571	0.550918	0.170669	0.372412	0.436754	0.82251
TWIST1	1.25	1.02384	1.52082	0.0379054	1.76247e-09	2.9682e-05	0.0116434	0.528015	0.411926	0.0229104	0.223802	0.951263
DLC1	1.25	1.03444	1.50944	0.000201754	1.15354e-10	0.00109649	0.0246608	0.25665	0.721558	0.268092	0.074895	0.9528
MSC	1.25	1.02287	1.52127	0.000312442	1.78691e-10	6.82642e-05	0.00364316	0.90715	0.546706	0.00473352	0.27095	0.675905
FABP4	1.25	1.01602	1.54389	0.000287692	6.58351e-15	0.00434263	0.00858849	0.0325353	0.0211739	0.230477	0.0401333	0.979753
LRP12	1.25	1.02153	1.52812	0.000864053	2.10555e-06	0.0013065	0.349967	0.255931	0.16378	0.100047	0.416778	0.973583
SHC3	1.25	1.03568	1.50958	0.0130538	2.23238e-10	0.00221786	0.067232	0.136538	0.166464	0.171742	0.153504	0.839331
EGR2	1.25	1.02775	1.51869	0.00240348	1.00958e-13	1.00786e-06	0.00956349	0.215318	0.142675	0.00114816	0.0398704	0.575899
OR51E1	1.25	1.01243	1.54328	0.00854976	4.00196e-06	0.0167709	0.0712037	0.375813	0.461626	0.299503	0.377892	0.842922
FADS1	1.25	1.0275	1.51831	2.50249e-07	2.67716e-09	0.000312681	0.0261548	0.845741	0.229182	0.0403154	0.241242	0.659098
FLRT2	1.25	1.03984	1.51216	1.78484e-05	1.77919e-12	0.000215462	0.00746751	0.120764	0.184405	0.0586191	0.126652	0.676354
SCG5	1.25	1.01235	1.55565	1.61593e-05	1.56155e-07	0.108032	0.0194497	0.280489	0.380498	0.513341	0.739749	0.486854
MC2R	1.25	1.00877	1.54217	2.30271e-05	0.000205559	0.01652	0.24594	0.612458	0.68827	0.0709557	0.484124	0.342663
ZNF578	1.25	1.01514	1.54612	0.00505264	6.88696e-06	0.0581229	0.0598503	0.0964733	0.103233	0.64289	0.213416	0.973519
EDA2R	1.25	1.04139	1.50083	1.55319e-05	6.73787e-12	0.00150352	0.032838	0.166524	0.109792	0.200264	0.0808128	0.898531
ADORA1	1.24	1.00054	1.53947	0.000449458	5.26819e-05	0.00124415	0.00198963	0.135014	0.656406	0.00745113	0.120212	0.699592
HOXD8	1.24	1.02226	1.51029	2.48743e-06	1.82375e-08	0.0106944	0.0221105	0.789146	0.156985	0.131015	0.242976	0.823538
PTPRN	1.24	1.01908	1.50193	0.048897	4.08677e-09	0.000726304	0.00511499	0.557721	0.0983741	0.0588263	0.185094	0.967089
IRS1	1.24	1.01724	1.51565	2.52173e-07	1.45252e-07	0.000435689	0.0237295	0.991354	0.774093	0.0370233	0.681976	0.707415
TGFBR2	1.24	1.01719	1.523	5.29677e-11	7.76425e-10	0.0286082	0.0227303	0.891067	0.573188	0.469044	0.383432	0.854689
MRAS	1.24	1.01651	1.52386	4.37785e-05	6.42836e-14	0.00110017	0.00201701	0.367848	0.0882781	0.193535	0.0223146	0.674798
SUCNR1	1.24	1.00052	1.52931	0.177792	0.000400401	0.0423421	0.124618	0.536786	0.784522	0.302803	0.374699	0.279372
SEC31A	1.24	1.0049	1.53391	0.0889578	5.85957e-07	0.101708	0.166955	0.493123	0.0986383	0.440258	0.71335	0.497848
INPP4B	1.24	1.00504	1.52447	6.85599e-08	2.13932e-06	0.0456495	0.127963	0.822225	0.512478	0.423486	0.872319	0.487929
PRDM6	1.24	1.02253	1.49854	2.72605e-05	1.41542e-13	2.32929e-05	0.00628702	0.2667	0.174758	0.012613	0.153428	0.689917
ENPP1	1.24	1.00366	1.52363	8.45774e-12	0.000559957	0.00220321	0.138426	0.870971	0.538175	0.245296	0.50897	0.596956
RELN	1.24	1.01195	1.51378	6.03988e-05	2.97344e-13	0.00771395	0.0319159	0.141877	0.0944905	0.227259	0.136574	0.857368
HEY1	1.24	1.01985	1.50535	0.000485366	1.95514e-11	0.00112212	0.00632039	0.382553	0.491059	0.0916994	0.229039	0.825106
ZFPM2	1.24	1.02628	1.49137	0.000242979	3.51503e-13	0.000145382	0.011878	0.10508	0.0878175	0.0935154	0.118192	0.911104
IGF2	1.24	1.02075	1.50855	0.000760351	5.66795e-10	0.000183695	0.00656372	0.245997	0.422444	0.0746497	0.143426	0.834989
PDE3B	1.24	1.00984	1.52832	2.80917e-08	0.000577509	0.00303518	0.534055	0.23291	0.25291	0.0334079	0.552459	0.402357
PTHLH	1.24	1.02199	1.50837	0.0122807	3.54247e-12	6.20827e-07	0.00887267	0.1174	0.18994	0.00208447	0.085229	0.780553
EFS	1.24	1.01549	1.51939	5.77288e-05	5.02524e-11	0.000344048	0.00765815	0.345111	0.207866	0.0568688	0.386716	0.804927
PRKD1	1.24	1.02849	1.4921	0.000421265	1.5864e-12	4.38738e-05	0.0201622	0.0811424	0.140893	0.0548048	0.0421482	0.941148
GAS7	1.24	1.01433	1.50634	6.22292e-06	7.75207e-14	0.000103265	0.0168122	0.365226	0.246654	0.0225607	0.192904	0.345434
CCL2	1.24	1.01047	1.52621	0.0271705	7.74218e-13	3.94143e-05	0.0226093	0.467234	0.152742	0.00538354	0.0559171	0.927019
HOXB2	1.24	1.01026	1.51469	3.64845e-05	1.09091e-11	0.0169207	0.0162367	0.152642	0.057223	0.052632	0.472141	0.714862
DPYSL5	1.23	1.01625	1.48351	1.11123e-06	4.78127e-08	0.00026437	0.0202789	0.546395	0.329936	0.0102737	0.473535	0.49971
LDB2	1.23	1.01213	1.49538	8.73965e-07	3.24846e-12	0.0288508	0.0118835	0.592639	0.202248	0.457734	0.355704	0.772735
PDGFC	1.23	1.00713	1.50493	0.0175594	4.91447e-10	8.76513e-05	0.0125406	0.267571	0.444902	0.046575	0.247324	0.788163
ID4	1.23	1.00145	1.50491	5.97446e-05	1.94003e-12	0.00260114	0.00396716	0.15253	0.0433297	0.201091	0.189269	0.921371
FHL5	1.23	1.0126	1.49469	6.16401e-06	2.75887e-12	0.0186432	0.0205276	0.440771	0.230611	0.435222	0.406408	0.788242
RGS17	1.23	1.0078	1.50887	4.43954e-05	0.00135266	0.0295675	0.723944	0.0586584	0.13638	0.205407	0.217873	0.920587
TEK	1.23	1.01383	1.50332	0.000131159	4.72171e-10	0.106894	0.0247078	0.408568	0.247127	0.529804	0.27226	0.7869
OMD	1.23	1.01728	1.47803	4.90896e-05	1.12137e-12	9.811e-05	0.00764525	0.0718634	0.116415	0.0524868	0.0727042	0.797652
GPR21	1.23	1.00318	1.49613	9.66975e-07	1.08693e-09	0.0435181	0.018724	0.166054	0.590695	0.601591	0.413482	0.909882
SHC4	1.23	1.01392	1.50011	9.65328e-05	9.03562e-09	3.41048e-05	0.0810464	0.0418168	0.267773	0.0500535	0.0394823	0.742873
PTPRM	1.23	1.01326	1.49463	4.28033e-07	2.66149e-11	0.0109173	0.0289946	0.316733	0.377874	0.360622	0.431301	0.732885
TCF4	1.23	1.01336	1.49358	8.93971e-08	4.76131e-11	0.00176388	0.0263705	0.327206	0.298083	0.284224	0.23897	0.764415
PTGIS	1.23	1.01873	1.48889	6.07387e-06	8.88188e-11	0.000476115	0.0105896	0.126293	0.102898	0.0726542	0.176451	0.777539
HUNK	1.23	1.0019	1.5206	2.0168e-11	0.00111469	0.00379803	0.0416975	0.743823	0.670085	0.151774	0.628287	0.604897
ERG	1.23	1.00713	1.4902	0.000104924	7.94838e-11	0.0641524	0.0108238	0.744812	0.392575	0.383145	0.287594	0.646994
CSDC2	1.23	1.01547	1.48408	0.000264672	8.68498e-11	8.81628e-06	0.00526273	0.181692	0.295469	0.00606561	0.145744	0.768484
KLF17	1.22	1.00838	1.47852	2.45703e-05	1.46453e-07	0.000490738	0.0344704	0.0373688	0.442027	0.0723339	0.130762	0.650989
PTCH2	1.22	1.01641	1.47523	5.3717e-07	1.50135e-11	0.00233228	0.00358186	0.0380398	0.201683	0.201208	0.0673259	0.713797
PTGER3	1.22	1.00924	1.47203	0.000252712	3.93377e-12	3.24195e-05	0.0110798	0.0967921	0.203019	0.0342504	0.125372	0.883481
DDR2	1.22	1.01219	1.46712	0.00015115	9.22457e-14	6.1588e-05	0.0158491	0.0830166	0.241816	0.0279409	0.0845755	0.74765
IRX1	1.22	1.00429	1.49294	1.0231e-05	4.54297e-11	7.7335e-05	0.00806241	0.283096	0.251121	0.0355927	0.262163	0.84996
MCC	1.22	1.00435	1.47885	1.74293e-06	1.08559e-12	0.000412926	0.0173424	0.107171	0.104988	0.0500797	0.203371	0.615745
ELOVL4	1.22	1.007	1.46759	6.26923e-06	1.93353e-12	0.000405158	0.0162975	0.122319	0.0431189	0.0942321	0.153657	0.781335
HEY2	1.22	1.00881	1.46482	1.84924e-05	4.94014e-10	0.0171727	0.0027944	0.419209	0.259872	0.272711	0.267694	0.80168
L3MBTL3	1.22	1.01031	1.48346	8.10687e-07	5.4853e-10	0.000891922	0.126903	0.0838709	0.154835	0.0905454	0.222138	0.91333
GLI3	1.22	1.01152	1.46333	0.00147399	4.34098e-12	0.000171473	0.0161338	0.177567	0.276845	0.0812286	0.136391	0.91045
ELN	1.22	1.00479	1.47177	2.52887e-07	5.92782e-10	0.00121611	0.00347178	0.46252	0.401404	0.0582401	0.469097	0.390529
EYA1	1.22	1.00811	1.47273	4.31791e-05	4.34632e-14	0.000138085	0.00826191	0.163951	0.130255	0.0414699	0.147128	0.741027
ZFHX4	1.22	1.01032	1.47806	0.000494267	5.30469e-10	1.59861e-05	0.0150952	0.0607267	0.223892	0.0267758	0.0255602	0.839969
GDF6	1.22	1.00811	1.46584	0.00052618	2.27836e-13	7.89704e-05	0.0073675	0.105875	0.121894	0.0384721	0.0588403	0.852155
GPR162	1.22	1.00838	1.48225	0.00137262	6.19194e-08	2.35407e-05	0.00288174	0.684762	0.621944	0.00443447	0.305333	0.739478
ZNF423	1.22	1.00085	1.48789	3.23578e-05	2.61252e-10	0.000357491	0.00849806	0.128667	0.19874	0.0540994	0.150811	0.584647
COLEC12	1.22	1.0072	1.48878	2.13074e-05	1.46636e-12	0.00225195	0.0173658	0.201767	0.165359	0.0759001	0.122883	0.78305
AXL	1.22	1.01534	1.46835	0.000222654	6.35759e-15	8.57708e-05	0.00531394	0.442625	0.210672	0.0254482	0.0959999	0.806836
ZDHHC15	1.22	1.00608	1.47166	9.07543e-06	1.32435e-11	0.00171282	0.0126788	0.112199	0.0570003	0.156801	0.12647	0.899107
KCNK2	1.21	1.01033	1.44841	0.00258068	1.02037e-11	0.000259495	0.0418887	0.0162352	0.0849091	0.0403985	0.0109665	0.730033
IL1R1	1.21	1.00448	1.46778	4.0885e-06	1.3402e-13	0.0465351	0.016365	0.282166	0.0704916	0.490688	0.304268	0.92767
PLCL1	1.21	1.00908	1.45831	9.2949e-07	5.49521e-12	0.00158543	0.100109	0.0902363	0.126731	0.187548	0.199383	0.79186
ROBO1	1.21	1.0034	1.46196	7.44968e-07	6.71497e-09	0.00332702	0.0581106	0.277225	0.33277	0.153885	0.626872	0.762802
CAV1	1.21	1.01301	1.44081	0.0155683	1.46949e-11	0.00122491	0.0502096	0.026746	0.0624113	0.185531	0.013059	0.951829
BNC2	1.21	1.00995	1.45682	0.000420663	4.94137e-14	6.34034e-05	0.0109888	0.0286231	0.109505	0.0428498	0.0281527	0.901918
GAS1	1.21	1.0048	1.46799	0.00654527	1.07255e-12	1.5931e-05	0.00519284	0.149004	0.237628	0.0189698	0.0941984	0.959754
DCLK1	1.21	1.00953	1.45537	0.000105242	6.01527e-15	8.72569e-05	0.0209868	0.029447	0.0848503	0.0474773	0.015747	0.847321
APH1B	1.21	1.00204	1.46718	3.73451e-09	1.87323e-09	0.00645188	0.290154	0.377485	0.0552447	0.0454026	0.551954	0.900516
MCHR1	1.21	1.00248	1.4688	0.692911	9.38464e-06	0.00180645	0.149851	0.681871	0.19781	0.0959604	0.0967976	0.891101
IGF1	1.2	1.00162	1.44642	8.77347e-07	6.1707e-14	0.000418286	0.0135238	0.106763	0.117737	0.0586488	0.0860634	0.658482
ZNF384	0.82	0.671774	0.996886	4.66928e-06	2.28261e-11	0.0243529	0.00262665	0.284583	0.136176	0.574949	0.407881	0.938352
RALGPS1	0.81	0.664756	0.997195	0.097536	3.66789e-11	0.00033003	0.00454416	0.437093	0.0220567	0.00967802	0.0678002	0.736219
ASB6	0.81	0.651555	0.998104	0.000195194	0.0135777	0.172037	0.869181	0.246908	0.939622	0.332874	0.593115	0.356479
SLTM	0.81	0.668641	0.992319	0.00672085	1.81496e-05	1.05805e-05	0.0171774	0.0795767	0.860441	0.0430435	0.0259886	0.792819
ANKZF1	0.8	0.654131	0.969752	0.0027885	1.60569e-12	0.0217943	0.00449327	0.886512	0.0567063	0.66939	0.175253	0.802894
ZMYND10	0.8	0.637699	0.997812	0.636423	0.000470831	0.0444807	0.462423	0.145854	0.787856	0.348041	0.144511	0.796421
KHSRP	0.8	0.646169	0.997604	0.000312414	1.80705e-05	0.446941	0.697199	0.367593	0.182534	0.51716	0.837006	0.748228
DFFB	0.79	0.644565	0.977815	1.36372e-11	1.33962e-06	0.00807217	0.00493751	0.210275	0.212556	0.0605659	0.37812	0.565318
ARID3C	0.79	0.645522	0.970014	3.34612e-07	4.22806e-09	0.194405	0.0843164	0.341557	0.103622	0.765803	0.590068	0.676145
NFATC2IP	0.79	0.625067	0.991087	4.70762e-06	0.61716	0.341501	0.387431	0.0568789	0.166291	0.270347	0.306968	0.0586816
ZNF497	0.79	0.62455	0.98816	0.02482	0.825248	0.483891	0.216632	0.110566	0.550086	0.0655039	0.379905	0.551036
ING5	0.78	0.616093	0.997034	0.00743121	2.62454e-12	5.46084e-05	0.0440625	0.767817	0.228849	0.0130415	0.108942	0.600667
VHL	0.78	0.624325	0.979828	0.13533	0.000108581	0.00206306	0.532784	0.56387	0.0451442	0.00394132	0.613988	0.317757
IKBKB	0.78	0.629572	0.966275	9.35526e-06	0.787962	0.00028761	0.477112	0.0189441	0.92313	0.673493	0.066159	0.172826
KDM4C	0.78	0.634651	0.954827	3.68357e-06	7.70938e-08	0.000210935	0.0148372	0.658305	0.479	0.0267303	0.197777	0.748474
STK11	0.78	0.629221	0.978404	0.394457	0.144975	0.105729	0.284565	0.198797	0.201227	0.012069	0.621824	0.577354
SAFB	0.78	0.623132	0.976181	0.00177291	4.6309e-08	0.399546	0.361336	0.650197	0.187168	0.79483	0.689949	0.662768
CSNK2A1	0.78	0.616765	0.989598	0.000427961	6.49413e-06	0.288326	0.912866	0.223064	0.204394	0.38816	0.603901	0.790767
PRPF6	0.78	0.629216	0.975631	0.0175082	1.7305e-10	0.00618949	0.571059	0.00414857	0.00807266	0.0919964	0.0115154	0.52152
FGF8	0.77	0.586931	0.997887	0.0150253	8.14332e-09	0.0898203	0.0297537	0.915224	0.0723181	0.477029	0.997195	0.560065
HTATSF1	0.77	0.60569	0.988116	9.45152e-05	4.02616e-09	0.0986619	0.00285261	0.96397	0.161515	0.479018	0.176165	0.93012
ZFP41	0.75	0.594302	0.955928	0.473633	4.36731e-06	0.0427275	0.960866	0.150483	0.199586	0.0939234	0.278633	0.160922
ACAD8	0.74	0.571311	0.961784	0.00132421	4.29003e-07	1.46728e-05	0.0824354	0.152226	0.571113	0.0369425	0.154125	0.84589
CASZ1	0.73	0.541817	0.975694	0.204709	0.129682	0.000779288	0.843763	0.85251	0.337374	0.00433591	0.312016	0.620927
ACIN1	0.73	0.582423	0.90936	0.105487	1.61915e-05	0.119143	0.125068	0.56951	0.00739753	0.457696	0.764301	0.946031
TAF15	0.73	0.566205	0.931912	0.0118533	0.008156	0.0409321	0.465192	0.2905	0.664062	0.0783919	0.673208	0.458864
SAFB2	0.73	0.577224	0.927146	0.798608	0.0265041	0.0442918	0.455738	0.929958	0.254202	0.00565887	0.798767	0.0324924
FOXD4L4	0.72	0.556456	0.921117	0.16161	6.32031e-05	0.0544858	0.224622	0.0244973	0.898789	0.153632	0.0939272	0.831969
RABL2B	0.72	0.56171	0.914284	0.0479669	0.00717474	0.589509	0.243265	0.601573	0.975487	0.728495	0.64629	0.945789
ZNF212	0.71	0.56647	0.898168	0.584068	0.00127809	0.40483	0.529313	0.157841	0.025991	0.142624	0.471385	0.299658
ARHGAP33	0.7	0.494529	0.991017	0.829965	0.00437012	0.237952	0.572893	0.901597	0.0844968	0.471487	0.89958	0.0780185
ZNF837	0.7	0.50365	0.984852	0.971293	0.0176272	0.00135409	0.939195	0.10797	0.256124	0.0245779	0.207175	0.435967
SFSWAP	0.66	0.486109	0.882739	0.947874	0.00127839	0.00383393	0.210428	0.741152	0.122802	0.35963	0.534312	0.193626

## Sheet: DSS
row.names	HR	low	high	microsatellite	DiffuseVsIntestinal	pathologic_T	ageD	anatomic_JGCA	gender	pathologic_stage	anatomic	pathologic_N	pathologic_M	h_pylori_infection
CGB5	2.52	1.63494	3.87501	0.0740212	0.197852	0.0334081	0.874773	0.968059	0.298966	0.0114568	0.640474	0.770544	0.00721054	0.475955
PMEPA1	2.03	1.21409	3.37853	0.00257916	0.183785	0.00196692	0.603537	0.696164	0.34595	0.0114439	0.283886	0.720859	0.248129	0.390392
MAP4K4	1.82	1.183	2.81506	0.000107286	0.028903	1.9447e-05	0.582552	0.702323	0.763468	0.00266472	0.779848	0.31656	0.108717	0.585805
ANKRD1	1.82	1.13421	2.92277	0.385018	0.0550163	0.00676233	0.600129	0.58975	0.3366	0.0442943	0.891959	0.952534	0.0699192	0.342242
SRGAP1	1.81	1.17663	2.7791	0.00971341	0.33707	0.00617399	0.424689	0.853606	0.0809542	0.10404	0.51625	0.338123	0.812806	0.32026
WT1	1.8	1.06704	3.04038	0.00421255	0.767044	0.000443634	0.639452	0.209209	0.822779	0.00439367	0.304154	0.794771	0.0130225	0.592672
CGB8	1.78	1.31513	2.41355	0.0454083	0.0233532	0.831934	0.485624	0.783517	0.805616	0.659761	0.0627603	0.832978	0.127645	0.172056
CYP26B1	1.77	1.17798	2.66628	0.206229	0.306427	0.415902	0.945487	0.410119	0.771519	0.097531	0.391104	0.779608	0.00405742	0.631793
EREG	1.69	1.21646	2.3452	0.204977	0.00918549	0.336887	0.273117	0.718977	0.932916	0.0183921	0.334499	0.501303	0.0460732	0.604366
WNT5A	1.68	1.14865	2.46178	0.233077	0.76048	0.0641051	0.6688	0.491711	0.362871	0.243505	0.70349	0.753799	0.0724336	0.518058
TLR2	1.68	1.06321	2.64439	0.00971529	0.442037	0.030322	0.216086	0.450095	0.978783	0.0179214	0.680472	0.210789	0.0162938	0.186085
CLEC5A	1.64	1.03964	2.58391	0.000939953	0.423642	0.0543593	0.808514	0.299113	0.176543	0.053265	0.465042	0.853057	0.0842028	0.351028
TBX15	1.63	1.24645	2.13128	0.0184854	0.437426	0.021855	0.691702	0.357251	0.824574	0.00504994	0.55679	0.768621	0.00739973	0.948076
CNIH3	1.59	1.19339	2.11695	0.00461937	0.000211816	1.28957e-06	0.148927	0.507139	0.500468	0.000347818	0.322242	0.170602	0.0284164	0.461205
TRPV4	1.59	1.06427	2.36083	0.0984275	0.80174	0.021953	0.269942	0.0114877	0.0483805	0.142722	0.0746821	0.722167	0.443142	0.795137
HRH1	1.58	1.04666	2.37943	0.114206	0.0497786	0.0287143	0.78569	0.156085	0.596614	0.0095369	0.287884	0.939909	0.037707	0.591909
ZNF365	1.58	1.12358	2.2168	0.00234775	2.58349e-05	1.63511e-05	0.181205	0.208692	0.247902	0.00542188	0.23727	0.867716	0.0251454	0.594162
RGL3	1.58	1.04452	2.38499	1.79299e-06	0.804489	0.41311	0.322587	0.0541486	0.749538	0.298658	0.14336	0.280857	0.983868	0.507059
RUNX2	1.56	1.0892	2.24505	0.0192013	5.65478e-06	5.27729e-05	0.154104	0.759673	0.868	0.0156825	0.569751	0.355864	0.162657	0.320059
CRABP2	1.55	1.099	2.18426	5.44653e-05	0.418415	0.0894304	0.235188	0.305489	0.356735	0.0248986	0.681728	0.148852	0.0266394	0.716715
IL1RAP	1.53	1.00685	2.3218	0.00828333	1.4937e-05	0.973742	0.442769	0.296338	0.120252	0.989883	0.0648085	0.236803	0.942983	0.748567
IRX4	1.53	1.11404	2.10027	1.40235e-06	0.0401993	0.00586161	0.503373	0.687444	0.106098	0.0106824	0.120717	0.565134	0.0720719	0.892144
SNAI2	1.52	1.10166	2.10757	0.451618	5.89244e-07	8.28932e-06	0.145015	0.682151	0.843191	0.0115418	0.383093	0.992505	0.032178	0.159335
RGS20	1.52	1.20759	1.92406	1.35745e-07	0.660599	0.0749133	0.670283	0.182944	0.62623	0.107647	0.00729831	0.329497	0.0122122	0.606949
RAB38	1.52	1.12471	2.06498	0.206401	0.000412746	0.195577	0.359236	0.619194	0.0511465	0.0201568	0.108148	0.296628	0.0698171	0.957848
MPZL1	1.51	1.0023	2.26271	0.101916	0.000962751	0.0841673	0.972187	0.0201561	0.0987407	0.155094	0.0935547	0.442268	0.274961	0.855011
APLP2	1.5	1.08408	2.07645	4.09374e-06	0.152779	0.0493604	0.364708	0.618703	0.398707	0.453455	0.63955	0.494759	0.833453	0.856902
EFNB3	1.49	1.13725	1.94942	4.24567e-05	0.012034	0.00677805	0.0476762	0.606122	0.709331	0.0985721	0.902995	0.639721	0.0539018	0.765379
MC5R	1.48	1.10104	1.99142	1.3303e-05	0.738481	0.0481398	0.9893	0.75445	0.412226	0.244649	0.644504	0.0669092	0.225534	0.668238
DKK1	1.47	1.10865	1.9525	3.09717e-10	0.0888221	0.0514258	0.011987	0.0483971	0.817758	0.0599289	0.135482	0.105545	0.299625	0.676157
IL20RB	1.46	1.10479	1.92513	0.226613	0.0020479	0.402052	0.839925	0.629379	0.763757	0.159819	0.000168566	0.674262	0.104897	0.217998
GPR87	1.46	1.12383	1.89392	0.00174304	0.756125	0.222951	0.215074	0.0443651	0.867618	0.44995	6.77435e-05	0.418112	0.154899	0.403016
PRKG2	1.46	1.14895	1.86064	0.00516075	0.032902	0.661227	0.504626	0.898419	0.894398	0.215154	0.0438577	0.615491	0.400939	0.0953635
DGKA	1.46	1.03235	2.0562	0.460272	0.000238263	0.39744	0.781382	0.166729	0.314265	0.773793	0.253286	0.666598	0.0748273	0.941248
ANTXR1	1.45	1.03592	2.02512	0.280773	6.29127e-08	5.06354e-07	0.091948	0.273651	0.832782	0.0022246	0.229295	0.978631	0.0363547	0.347518
ITGA11	1.45	1.00641	2.08881	0.380539	5.91019e-05	1.50203e-07	0.0549658	0.841297	0.730456	0.000760382	0.343666	0.76426	0.136716	0.333279
GUCY2D	1.45	1.17308	1.79674	0.000632917	0.111098	0.767799	0.670458	0.0978635	0.75272	0.263264	0.409955	0.526596	0.127914	0.351082
CABYR	1.45	1.10385	1.9093	8.71052e-14	0.00308096	0.0023234	0.226915	0.875828	0.112728	0.00360901	0.626437	0.232371	0.0329059	0.97806
CYP24A1	1.45	1.06898	1.96882	0.000618298	0.000509659	0.605767	0.461001	0.209147	0.291445	0.150107	0.0376293	0.823305	0.241783	0.400978
PDPN	1.44	1.0407	1.98996	0.274074	6.69933e-05	4.95033e-06	0.0489564	0.995659	0.744486	0.00413398	0.407976	0.790982	0.0669627	0.112702
PRRX1	1.44	1.03817	1.99521	0.0991562	3.176e-09	7.87274e-08	0.0945423	0.095512	0.466686	0.000769527	0.0802744	0.935854	0.0312917	0.137395
GPR1	1.44	1.06702	1.93271	0.0836367	3.34808e-07	2.40252e-07	0.0466104	0.193863	0.448054	0.000198301	0.377452	0.767529	0.0229619	0.26315
NLRP12	1.44	1.10763	1.88396	5.62614e-06	0.00110536	0.0501487	0.283057	0.519265	0.351679	0.261197	0.33805	0.707954	0.120154	0.337163
EN1	1.43	1.08392	1.89317	0.020297	0.000175487	0.000387089	0.105279	0.820845	0.190759	0.0115804	0.241424	0.484576	0.0178774	0.191442
KCNH8	1.43	1.01944	2.01277	1.36653e-06	0.729819	0.446695	0.811403	0.0817946	0.27737	0.58517	0.202046	0.238516	0.51947	0.883947
CDKN2B	1.43	1.0185	2.00417	0.486778	0.798775	0.0194975	0.663011	0.693413	0.812927	0.318638	0.196049	0.147107	0.266057	0.665582
CABP4	1.43	1.09691	1.87078	2.42454e-08	0.5781	0.460355	0.640545	0.164185	0.905965	0.666208	0.238447	0.513626	0.407603	0.306062
LHX9	1.42	1.03963	1.94848	0.517989	0.806473	0.000604997	0.226814	0.175792	0.425191	0.00917371	0.411008	0.921091	0.0334243	0.699754
MGLL	1.42	1.07613	1.86971	0.0468558	0.0148301	0.326462	0.404597	0.886171	0.825589	0.76668	0.95511	0.759913	0.346095	0.738682
LOXL2	1.42	1.00509	2.00751	0.693095	0.0081245	0.00189179	0.137718	0.48698	0.302124	0.103744	0.424271	0.982637	0.101978	0.252716
NTS	1.42	1.06886	1.89792	9.74154e-06	0.0194265	0.197542	0.670581	0.0639596	0.178783	0.519348	0.0436138	0.582761	0.54663	0.822025
RAB3B	1.41	1.0704	1.84781	4.70495e-05	0.089632	0.225206	0.296041	0.914472	0.77031	0.704235	0.975046	0.943729	0.206123	0.823247
ACVR1	1.4	1.06455	1.84761	0.000156188	1.4545e-08	0.0279478	0.00317769	0.9313	0.867009	0.277293	0.611616	0.341512	0.952438	0.166283
SHOX2	1.4	1.05678	1.85307	2.41046e-05	0.243778	0.0929632	0.99127	0.609755	0.30629	0.299394	0.303861	0.879659	0.253797	0.384615
FGF3	1.4	1.03265	1.9022	0.00915478	0.000533928	0.18761	0.129133	0.362641	0.932026	0.253995	0.80497	0.712768	0.453369	0.112575
MPP3	1.4	1.03258	1.90478	0.238361	0.231078	0.183302	0.177399	0.143306	0.798864	0.915586	0.0585416	0.592991	0.501871	0.308599
RPE65	1.39	1.00607	1.91166	0.000396447	0.0261587	0.131492	0.5238	0.490627	0.168966	0.354769	0.905704	0.854508	0.322241	0.241757
POU3F2	1.39	1.10464	1.74779	7.8271e-06	0.221112	0.015807	0.973604	0.535725	0.292479	0.0169687	0.85276	0.341479	0.0900362	0.868305
ZNF750	1.39	1.00219	1.91642	2.15555e-08	0.669807	0.309303	0.376908	0.959689	0.625723	0.331226	0.0917535	0.410239	0.827885	0.443897
ARHGAP40	1.39	1.00909	1.91674	2.64647e-07	0.294829	0.412206	0.764807	0.0150712	0.452896	0.659238	0.0216827	0.139086	0.48566	0.643323
LPAR3	1.38	1.0147	1.88493	4.91509e-08	0.0777529	0.944039	0.491133	0.174063	0.439383	0.860012	0.302238	0.463915	0.522003	0.623959
SEC31A	1.38	1.05841	1.79429	0.0889578	5.85957e-07	0.101708	0.166955	0.493123	0.0986383	0.440258	0.71335	0.497848	0.575904	0.95786
PPIC	1.38	1.03823	1.82298	0.12888	0.397475	0.00865316	0.352907	0.478793	0.976401	0.0824585	0.657504	0.619519	0.453265	0.448365
EDN1	1.38	1.01693	1.86629	3.47709e-05	0.000429809	0.0218316	0.436209	0.368436	0.271344	0.290806	0.522838	0.621769	0.0979874	0.224246
GLIS3	1.38	1.07374	1.77961	2.68587e-05	1.17468e-10	0.00116063	0.00960209	0.466917	0.415702	0.100355	0.424416	0.780337	0.311124	0.322463
MC2R	1.38	1.06155	1.80095	2.30271e-05	0.000205559	0.01652	0.24594	0.612458	0.68827	0.0709557	0.484124	0.342663	0.341766	0.861149
DNER	1.37	1.03966	1.8083	8.97764e-06	4.2588e-07	0.0450991	0.0284382	0.89874	0.0124238	0.370995	0.595509	0.947533	0.219982	0.652403
FOXL2	1.37	1.07821	1.73607	5.94315e-06	0.0213294	0.247776	0.577016	0.311467	0.720364	0.101262	0.663454	0.188539	0.141444	0.711964
C9	1.37	1.00091	1.86448	0.000212513	0.120096	0.297246	0.0277865	0.488169	0.75706	0.430494	0.894569	0.882407	0.523638	0.23947
CALCR	1.37	1.0559	1.76731	2.03422e-07	1.06301e-05	0.00115128	0.49652	0.628452	0.292748	0.0132499	0.945238	0.796991	0.515068	0.749247
PRRX2	1.37	1.0365	1.80449	0.000122066	0.107008	0.0119249	0.0691606	0.47565	0.509135	0.0178092	0.40883	0.649843	0.0909062	0.285014
CELSR1	1.37	1.04063	1.79832	0.00092448	0.046074	0.529774	0.952446	0.254463	0.428602	0.774149	0.218989	0.523601	0.825091	0.63383
GPR78	1.36	1.01461	1.8324	0.0268582	0.736682	0.329841	0.311066	0.283235	0.988902	0.512831	1.59619e-05	0.804593	0.202871	0.545728
RGS17	1.36	1.05646	1.74328	4.43954e-05	0.00135266	0.0295675	0.723944	0.0586584	0.13638	0.205407	0.217873	0.920587	0.188488	0.778902
GPR85	1.36	1.00474	1.8506	0.0176712	2.69739e-05	1.82158e-05	0.326778	0.637151	0.758481	0.00221969	0.847955	0.208863	0.0850568	0.832167
FGF19	1.36	1.06649	1.74495	0.000426037	0.0167334	0.0862695	0.72293	0.625693	0.542608	0.02493	0.592768	0.216141	0.125767	0.865573
SIX3	1.35	1.04896	1.73187	0.492615	0.00545506	0.739032	0.326307	0.246338	0.815411	0.831368	0.21029	0.925618	0.307393	0.216633
MARCO	1.35	1.00293	1.80803	0.0190288	0.387852	0.00752003	0.572516	0.624991	0.544366	0.105894	0.456599	0.907295	0.211679	0.134191
RASGRF2	1.35	1.00813	1.81253	0.00124464	6.55731e-08	0.0318439	0.0307249	0.74126	0.741249	0.418779	0.79438	0.7822	0.289598	0.554535
SPOCK1	1.35	1.00089	1.82639	0.259925	2.41389e-07	4.71139e-07	0.139546	0.0840441	0.471984	0.00244077	0.0751797	0.97005	0.101193	0.175241
SIX4	1.35	1.01318	1.80787	0.0201449	0.00182718	0.0122867	0.0376118	0.965071	0.473658	0.152362	0.923841	0.768951	0.205164	0.915883
FSTL3	1.35	1.01195	1.7957	0.612252	0.00140522	1.70682e-05	0.0211598	0.89875	0.371303	0.000872829	0.39187	0.780874	0.0500348	0.200883
GNGT1	1.34	1.04282	1.71443	8.82842e-08	0.361846	0.539626	0.925545	0.517951	0.944537	0.163533	0.629379	0.321654	0.48544	0.519018
CAV2	1.34	1.0723	1.68401	0.0192219	1.48543e-10	0.000353887	0.150445	0.094023	0.0267905	0.1595	0.147211	0.917854	0.260744	0.205729
FOXG1	1.34	1.05754	1.69695	0.000274836	0.668791	0.092336	0.952012	0.501919	0.499655	0.0570077	0.0040045	0.903893	0.306291	0.23479
FPR1	1.34	1.01423	1.76385	0.490572	0.00021692	0.000155852	0.310614	0.102104	0.176309	0.0143428	0.103311	0.716456	0.0165797	0.0264384
STK17B	1.33	1.03066	1.71852	0.00767596	0.000333194	0.000445382	0.471987	0.0100372	0.425364	0.0738614	0.0687997	0.667799	0.645361	0.964738
CXXC4	1.33	1.0193	1.73839	4.44084e-14	0.00195614	0.0161786	0.437101	0.537434	0.260187	0.163193	0.537781	0.44172	0.698428	0.784761
INPP4B	1.33	1.02893	1.727	6.85599e-08	2.13932e-06	0.0456495	0.127963	0.822225	0.512478	0.423486	0.872319	0.487929	0.912776	0.758596
PDGFC	1.33	1.039	1.69056	0.0175594	4.91447e-10	8.76513e-05	0.0125406	0.267571	0.444902	0.046575	0.247324	0.788163	0.350971	0.239311
TBX18	1.33	1.00123	1.75354	0.0631197	9.76346e-10	4.26705e-05	0.0721519	0.140237	0.22515	0.0135348	0.211242	0.935524	0.0160898	0.333718
HOXA1	1.33	1.0404	1.70554	2.6954e-07	0.0334155	0.546375	0.96474	0.719608	0.943843	0.209495	0.309897	0.19551	0.89689	0.728328
CHRNB1	1.33	1.02924	1.71571	0.000478566	0.10443	0.531496	0.232487	0.918007	0.851338	0.10991	0.65343	0.591923	0.15036	0.235129
ITGA2B	1.33	1.0269	1.71614	2.04248e-06	0.290749	0.0436422	0.758374	0.347152	0.143215	0.117181	0.592737	0.61718	0.168837	0.559577
PLAGL1	1.32	1.0164	1.72635	9.73536e-07	0.000173677	0.178607	0.317126	0.43962	0.126416	0.305606	0.779928	0.771583	0.458065	0.85574
ZNF530	1.32	1.0311	1.68796	0.00011517	0.756244	0.955637	0.798915	0.992598	0.129893	0.484852	0.986002	0.0981329	0.3586	0.577543
ZNF648	1.31	1.01973	1.68078	8.88511e-06	0.317956	0.601822	0.731817	0.193432	0.658422	0.349718	0.291772	0.810439	0.962079	0.500359
IL1RL2	1.31	1.01196	1.70664	0.00162795	3.72652e-09	0.748386	0.321301	0.0716715	0.227206	0.773897	0.0220402	0.11404	0.69721	0.0746588
PTH2R	1.31	1.003	1.70058	4.9298e-09	0.0122234	0.194766	0.324473	0.471803	0.294065	0.16884	0.756367	0.1891	0.189763	0.515134
TACR3	1.31	1.01201	1.70236	0.0492083	0.693589	0.253773	0.605163	0.837818	0.305233	0.452857	0.512681	0.739425	0.293745	0.536937
GABRR1	1.31	1.03532	1.66146	0.00965704	1.41785e-05	0.487687	0.0254353	0.811137	0.603727	0.281836	0.262516	0.502499	0.58971	0.392383
GPR63	1.31	1.00114	1.71742	0.00106689	0.00330152	0.00477353	0.495564	0.0369941	0.435621	0.0273094	0.126595	0.755599	0.122764	0.87382
OPRK1	1.31	1.02492	1.6691	0.444956	0.0127039	0.509232	0.491522	0.537454	0.119237	0.272839	0.43549	0.676997	0.220521	0.11546
GDF3	1.31	1.02256	1.67564	1.61461e-06	1.04622e-06	0.00684969	0.0472376	0.181154	0.314764	0.274855	0.17186	0.904061	0.0753896	0.192827
ALDH1A2	1.31	1.00456	1.71494	9.30617e-05	9.98529e-07	0.0110756	0.0752754	0.10186	0.0236704	0.263808	0.288926	0.945242	0.200908	0.466242
EN2	1.29	1.00316	1.65992	2.99014e-07	0.861079	0.176672	0.908899	0.358911	0.820783	0.528394	0.801988	0.360654	0.604468	0.883933
ZDHHC2	1.29	1.0026	1.6481	7.11816e-10	5.88805e-09	0.0119388	0.0839485	0.512447	0.0883772	0.119822	0.710553	0.735031	0.459898	0.734521
DUSP9	1.29	1.014	1.63388	0.153072	0.000124001	0.547322	0.0775087	0.140934	0.816728	0.00601535	0.157994	0.161879	0.094344	0.658178
TCF23	1.28	1.00173	1.6248	3.04732e-07	9.89401e-09	0.0263776	0.00448367	0.130067	0.18474	0.390818	0.212929	0.934909	0.357122	0.450721
DCBLD2	1.28	1.00136	1.63238	0.000187805	4.88811e-06	0.0070645	0.166926	0.0842893	0.153588	0.392681	0.233164	0.7668	0.254613	0.668792
LRP12	1.28	1.00312	1.63901	0.000864053	2.10555e-06	0.0013065	0.349967	0.255931	0.16378	0.100047	0.416778	0.973583	0.416912	0.278099
CYP26A1	1.28	1.01983	1.61782	0.00389008	0.637085	0.0270609	0.0951189	0.244731	0.337396	0.00452662	0.249634	0.511467	0.853307	0.519503
MCHR2	1.27	1.02011	1.58475	0.0220577	0.00396915	0.875364	0.402013	0.181003	0.73378	0.325261	0.545995	0.755388	0.445176	0.152508
L3MBTL3	1.27	1.00373	1.60343	8.10687e-07	5.4853e-10	0.000891922	0.126903	0.0838709	0.154835	0.0905454	0.222138	0.91333	0.34035	0.388791
EYA4	1.27	1.00559	1.61408	0.000172064	6.35002e-11	5.54476e-06	0.0348294	0.102924	0.182902	0.0119023	0.112036	0.817732	0.128373	0.128157
ETV1	1.27	1.00242	1.61983	0.0115596	3.65984e-08	0.00502426	0.114696	0.137436	0.130184	0.464012	0.259532	0.998169	0.130643	0.859191
RGS22	1.27	1.00156	1.62292	5.82539e-06	4.96655e-11	0.000257991	0.0208382	0.178638	0.108523	0.0763693	0.242059	0.881958	0.127653	0.0696046
APH1B	1.27	1.0051	1.60091	3.73451e-09	1.87323e-09	0.00645188	0.290154	0.377485	0.0552447	0.0454026	0.551954	0.900516	0.231704	0.206897
LIN28B	1.26	1.03001	1.55063	0.000199231	0.0910415	0.841889	0.933995	0.617222	0.338177	0.274926	0.940408	0.932776	0.207739	0.254993
RASGEF1A	1.26	1.00643	1.58897	4.33883e-05	0.185858	0.354157	0.987134	0.54174	0.595921	0.300259	0.485361	0.212173	0.751562	0.748466
HOXC12	1.26	1.00486	1.58633	0.0122716	6.48555e-05	0.40788	0.0898697	0.849082	0.636001	0.106805	0.539903	0.0593822	0.39519	0.427134
GRM4	1.25	1.00794	1.55075	0.000100611	0.670006	0.0712701	0.895387	0.391873	0.636225	0.0277873	0.595157	0.404218	0.169472	0.70047
STK25	0.77	0.588575	0.998635	0.00810349	0.00039362	0.00188986	0.817431	0.0767748	0.249479	0.127837	0.295465	0.514628	0.89169	0.752813
MIB2	0.76	0.57832	0.998095	0.0025342	0.00264047	0.0603297	0.931974	0.961312	0.396874	0.0544272	0.991205	0.362695	0.246072	0.797844
SDHA	0.76	0.583032	0.987361	1.64943e-07	0.000118072	0.00594469	0.583688	0.184069	0.326799	0.23508	0.460774	0.95076	0.871044	0.791075
ZNF526	0.76	0.582522	0.992962	0.0262111	0.00746219	0.143659	0.636124	0.0164337	0.14479	0.312148	0.118133	0.498067	0.951699	0.513594
PPP2R5D	0.75	0.596309	0.952797	1.57647e-05	4.93753e-09	0.00297678	0.362576	0.0257851	0.0598048	0.197453	0.110717	0.896808	0.075274	0.960794
PEBP1	0.75	0.560326	0.993636	0.000404075	0.00654113	0.00518751	0.428797	0.29983	0.82059	0.178843	0.400239	0.629445	0.471385	0.465074
KHSRP	0.75	0.576435	0.985884	0.000312414	1.80705e-05	0.446941	0.697199	0.367593	0.182534	0.51716	0.837006	0.748228	0.43035	0.486667
CSNK2A1	0.74	0.555647	0.99402	0.000427961	6.49413e-06	0.288326	0.912866	0.223064	0.204394	0.38816	0.603901	0.790767	0.0822296	0.257593
DFFB	0.73	0.561739	0.948186	1.36372e-11	1.33962e-06	0.00807217	0.00493751	0.210275	0.212556	0.0605659	0.37812	0.565318	0.521263	0.355336
SMARCC2	0.73	0.527335	0.996784	0.543876	0.286794	0.0888247	0.344656	0.524982	0.183888	0.129009	0.753644	0.460843	0.0163519	0.360632
STK11	0.73	0.561347	0.959255	0.394457	0.144975	0.105729	0.284565	0.198797	0.201227	0.012069	0.621824	0.577354	0.0232258	0.671921
SAFB	0.73	0.551709	0.965519	0.00177291	4.6309e-08	0.399546	0.361336	0.650197	0.187168	0.79483	0.689949	0.662768	0.537892	0.294455
L3MBTL2	0.73	0.54769	0.980337	0.498317	0.716696	0.0404007	0.635971	0.0096635	0.389698	0.782245	0.0187948	0.848523	0.594924	0.342465
RBBP7	0.73	0.537359	0.994333	6.92036e-06	0.00186244	0.396193	0.022074	0.50433	0.336837	0.582196	0.904938	0.665469	0.629541	0.685212
TMED4	0.72	0.533365	0.964936	0.00956996	1.99245e-09	0.0274307	0.446413	0.0300423	0.0825477	0.420671	0.0369987	0.85368	0.227445	0.363744
ZNF696	0.71	0.522717	0.958821	0.0816837	2.49417e-08	0.159413	0.31708	0.97391	0.0538928	0.498231	0.754036	0.259195	0.0871743	0.788047
ZNF497	0.71	0.536198	0.953355	0.02482	0.825248	0.483891	0.216632	0.110566	0.550086	0.0655039	0.379905	0.551036	0.0622853	0.835401
ASB6	0.7	0.537568	0.923739	0.000195194	0.0135777	0.172037	0.869181	0.246908	0.939622	0.332874	0.593115	0.356479	0.58405	0.398369
BRD7	0.7	0.519057	0.955235	0.00336741	0.0246005	0.453507	0.64596	0.988856	0.687534	0.906421	0.981433	0.919133	0.532241	0.990348
ZNF212	0.68	0.504946	0.902683	0.584068	0.00127809	0.40483	0.529313	0.157841	0.025991	0.142624	0.471385	0.299658	0.0145495	0.648003
ACIN1	0.68	0.511749	0.890414	0.105487	1.61915e-05	0.119143	0.125068	0.56951	0.00739753	0.457696	0.764301	0.946031	0.085555	0.78876
SAFB2	0.68	0.507899	0.909825	0.798608	0.0265041	0.0442918	0.455738	0.929958	0.254202	0.00565887	0.798767	0.0324924	0.0470149	0.659776
MAP3K15	0.68	0.500651	0.931768	0.000492169	0.00805929	4.99358e-05	0.4392	0.917619	0.665048	0.0307397	0.455251	0.67332	0.648031	0.622578
CASZ1	0.66	0.458523	0.955451	0.204709	0.129682	0.000779288	0.843763	0.85251	0.337374	0.00433591	0.312016	0.620927	0.0164633	0.396125
ZFP41	0.66	0.489393	0.87941	0.473633	4.36731e-06	0.0427275	0.960866	0.150483	0.199586	0.0939234	0.278633	0.160922	0.0672705	0.530944
TAF15	0.65	0.480755	0.887335	0.0118533	0.008156	0.0409321	0.465192	0.2905	0.664062	0.0783919	0.673208	0.458864	0.16094	0.565138
RABL2B	0.65	0.47443	0.885251	0.0479669	0.00717474	0.589509	0.243265	0.601573	0.975487	0.728495	0.64629	0.945789	0.591758	0.123561
SFSWAP	0.6	0.410769	0.873418	0.947874	0.00127839	0.00383393	0.210428	0.741152	0.122802	0.35963	0.534312	0.193626	0.279926	0.671405
ARHGAP33	0.56	0.359791	0.878433	0.829965	0.00437012	0.237952	0.572893	0.901597	0.0844968	0.471487	0.89958	0.0780185	0.0757173	0.75382

## Sheet: DFI
row.names	HR	low	high	microsatellite	DiffuseVsIntestinal	pathologic_T	ageD	anatomic_JGCA	gender	pathologic_stage3	anatomic	pathologic_N	pathologic_M	h_pylori_infection	pathologic_stage2	Fpval
RGS20	2.68	1.15124	6.22021	1.35745e-07	0.660599	0.0749133	0.670283	0.182944	0.62623	0.107647	0.00729831	0.329497	0.0122122	0.606949	0.102991	6.0543e-07
RAB38	2.22	1.20223	4.10706	0.206401	0.000412746	0.195577	0.359236	0.619194	0.0511465	0.0201568	0.108148	0.296628	0.0698171	0.957848	0.14301	0.000318503
RPE65	2.1	1.14344	3.84627	0.000396447	0.0261587	0.131492	0.5238	0.490627	0.168966	0.354769	0.905704	0.854508	0.322241	0.241757	0.808968	0.0150577
GNB3	1.97	1.06494	3.64454	6.33735e-07	0.000783208	0.0600198	0.443051	0.0417912	0.191368	0.573386	0.242995	0.689205	0.7369	0.722991	0.365208	4.81754e-06
EDN1	1.88	1.05831	3.35238	3.47709e-05	0.000429809	0.0218316	0.436209	0.368436	0.271344	0.290806	0.522838	0.621769	0.0979874	0.224246	0.589761	2.11047e-05
TANK	1.85	1.08634	3.16264	0.276088	0.00310063	0.127129	0.468375	0.0307856	0.0831115	0.475781	0.101083	0.230789	0.203481	0.74313	0.79348	0.00590883
LMO4	1.75	1.04748	2.92844	0.0525109	1.93709e-05	0.316482	0.155685	0.354883	0.142642	0.0879707	0.83098	0.488792	0.947402	0.55025	0.0510398	0.0004966
RAP1B	1.74	1.00743	3.01336	0.187987	3.08679e-11	0.0873845	0.076252	0.247831	0.00924292	0.569007	0.141937	0.361395	0.343272	0.508418	0.894081	1.0631e-08
ZNF599	1.74	1.00234	3.03591	1.26055e-06	0.470439	0.421803	0.967862	0.84914	0.249117	0.523426	0.656641	0.629612	0.54991	0.783732	0.226157	0.0154679
POU5F2	1.73	1.04767	2.85672	2.43914e-05	0.0136641	0.222098	0.194506	0.0649412	0.522342	0.46565	0.319568	0.753942	0.939384	0.378529	0.877662	0.001599
RGS17	1.63	1.02123	2.60212	4.43954e-05	0.00135266	0.0295675	0.723944	0.0586584	0.13638	0.205407	0.217873	0.920587	0.188488	0.778902	0.554654	3.32115e-05
BRDT	1.6	1.00895	2.54569	0.0195911	0.247112	0.790764	0.48714	0.683841	0.847543	0.120774	0.960109	0.326791	0.584691	0.0450526	0.515074	0.227516
CIR1	1.6	1.03815	2.45165	0.501	0.563524	0.0081781	0.247122	0.0008554	0.134744	0.576523	0.00583787	0.302147	0.76381	0.818107	0.683596	0.00215188
GUCA1B	1.58	1.01443	2.45357	0.000140918	0.00674493	0.00118904	0.962339	0.000282483	0.418797	0.1462	0.00230789	0.594294	0.520117	0.931655	0.150795	3.34511e-08
CRX	1.54	1.00247	2.3733	0.0953415	0.144865	0.960856	0.380358	0.867353	0.850623	0.0974367	0.997183	0.203742	0.41763	0.099273	0.239532	0.249448
YBX2	0.66	0.446206	0.990266	0.00389982	2.10664e-12	0.00747543	0.0634234	0.531882	0.154125	0.0621623	0.808803	0.480056	0.872428	0.613176	0.157927	7.78606e-11
AKAP4	0.66	0.437659	0.996618	0.0462998	7.22593e-10	0.306935	0.00670012	0.256411	0.139017	0.664945	0.481923	0.857806	0.801648	0.791576	0.529218	1.06574e-06
ETS2	0.64	0.414977	0.993645	0.204277	0.0028603	0.0771206	0.455904	0.935214	0.0606092	0.132101	0.755634	0.735055	0.554404	0.513467	0.215963	0.0336317
CAMKK2	0.62	0.398676	0.973689	0.547995	0.0783394	0.270931	0.00711821	0.908714	0.167682	0.932263	0.833502	0.229058	0.220131	0.76788	0.8346	0.187076
HIC2	0.61	0.372129	0.991298	0.147733	3.60475e-07	0.32618	0.169661	0.113086	0.0141578	0.51699	0.288958	0.278264	0.0773079	0.505416	0.261751	4.87407e-06
HTT	0.59	0.36188	0.961086	0.000329647	0.00234088	0.0845329	0.301915	0.0852043	0.00878801	0.453431	0.289452	0.38218	0.257473	0.477183	0.56131	4.29709e-05
SNAPC4	0.59	0.365713	0.965891	0.0192043	8.52306e-10	0.422333	0.18039	0.142196	0.0478389	0.825587	0.245967	0.457468	0.88211	0.630129	0.965091	1.6533e-06
PPRC1	0.59	0.358964	0.982826	4.778e-05	1.19145e-10	0.0602983	0.250503	0.262535	0.0521726	0.390222	0.507251	0.926741	0.345829	0.324176	0.825947	1.09671e-09
TRIM28	0.59	0.354735	0.967828	0.000290584	4.29204e-06	0.270775	0.783662	0.0661827	0.330805	0.839605	0.301541	0.953489	0.966574	0.669845	0.9148	0.000256613
PPP2R5D	0.58	0.381233	0.881746	1.57647e-05	4.93753e-09	0.00297678	0.362576	0.0257851	0.0598048	0.197453	0.110717	0.896808	0.075274	0.960794	0.305408	1.13563e-11
CSNK2A1	0.58	0.339776	0.996726	0.000427961	6.49413e-06	0.288326	0.912866	0.223064	0.204394	0.38816	0.603901	0.790767	0.0822296	0.257593	0.585827	5.6124e-05
MMS19	0.57	0.333923	0.975324	1.08256e-07	0.0112017	0.0373144	0.311889	0.10585	0.128657	0.336029	0.379897	0.840568	0.526198	0.400061	0.126718	1.98795e-06
DUSP8	0.57	0.338333	0.96067	0.145315	0.0879611	0.4647	0.418742	0.359625	0.208913	0.665238	0.684568	0.203099	0.443656	0.282661	0.891391	0.337434
SF1	0.57	0.340322	0.948298	9.28193e-05	1.60503e-05	0.479288	0.770941	0.243111	0.133761	0.957499	0.643877	0.903761	0.315661	0.72042	0.918952	0.000454163
GIT1	0.57	0.345901	0.941416	0.019361	8.26569e-06	0.379604	0.764525	0.0786125	0.014543	0.834762	0.291533	0.483417	0.151912	0.813694	0.829538	0.000218431
CABIN1	0.57	0.335559	0.957873	0.826996	0.463902	0.563941	0.117786	0.117814	0.0348312	0.165667	0.294552	0.303235	0.0151843	0.682921	0.0788473	0.0167577
DAB2IP	0.55	0.326388	0.927579	0.931967	0.214285	0.125589	0.203092	0.0354646	0.00273954	0.169443	0.147428	0.452315	0.0492074	0.918676	0.161284	0.00263717
ZNF142	0.54	0.313995	0.945545	0.125429	0.00626471	0.432378	0.229782	0.449809	0.043873	0.563573	0.734628	0.480736	0.229631	0.615195	0.540574	0.0663571
PDCD11	0.53	0.294688	0.956851	1.06139e-05	8.92434e-09	0.156726	0.0952007	0.432961	0.164834	0.401991	0.823452	0.959292	0.830864	0.525178	0.579716	9.75718e-08
ILF3	0.53	0.295934	0.959454	0.000378685	8.12507e-07	0.628507	0.065778	0.889242	0.242824	0.946697	0.942445	0.813504	0.712931	0.468357	0.968463	0.000219319
EHMT1	0.52	0.306158	0.876876	0.122306	0.00986233	0.345525	0.334636	0.221248	0.0405913	0.68285	0.562186	0.22512	0.118694	0.534706	0.624455	0.0305451
KDM5C	0.52	0.308464	0.877098	0.102893	0.0059308	0.882839	0.21081	0.196557	0.0117151	0.768556	0.596801	0.392475	0.152842	0.798855	0.830928	0.0321493
HCFC1	0.51	0.270278	0.980287	0.2064	0.00778715	0.565072	0.285715	0.867723	0.0506345	0.578772	0.790567	0.263925	0.0829982	0.543621	0.349621	0.0642129
AMER1	0.49	0.293618	0.834378	0.207614	0.182761	0.219626	0.720649	0.845505	0.256673	0.571931	0.894619	0.370906	0.198716	0.758012	0.660315	0.625392
ZFP41	0.48	0.266537	0.866686	0.473633	4.36731e-06	0.0427275	0.960866	0.150483	0.199586	0.0939234	0.278633	0.160922	0.0672705	0.530944	0.29668	7.25362e-05
ZNF526	0.48	0.28182	0.830101	0.0262111	0.00746219	0.143659	0.636124	0.0164337	0.14479	0.312148	0.118133	0.498067	0.951699	0.513594	0.969636	0.0088711
TBC1D14	0.47	0.269521	0.807849	0.0029159	0.501108	0.115517	0.395035	0.361399	0.246566	0.0264436	0.547422	0.45244	0.498541	0.664653	0.210188	0.024467
SMC1A	0.47	0.229108	0.982818	7.07944e-06	6.61376e-05	0.35903	0.0275553	0.672144	0.800813	0.683705	0.733703	0.49062	0.466914	0.349499	0.863206	6.06637e-05
NUP214	0.46	0.252849	0.841865	0.309019	0.0045977	0.358178	0.252354	0.71394	0.0895348	0.229278	0.610726	0.541713	0.352166	0.210531	0.271522	0.05029

## Sheet: PFI
row.names	HR	low	high	microsatellite	DiffuseVsIntestinal	pathologic_T	ageD	anatomic_JGCA	gender	pathologic_stage	anatomic	pathologic_N	pathologic_M	h_pylori_infection
CGB5	2.12	1.45981	3.07432	0.0740212	0.197852	0.0334081	0.874773	0.968059	0.298966	0.0114568	0.640474	0.770544	0.00721054	0.475955
PMEPA1	1.85	1.18824	2.88652	0.00257916	0.183785	0.00196692	0.603537	0.696164	0.34595	0.0114439	0.283886	0.720859	0.248129	0.390392
CGB8	1.75	1.34689	2.26307	0.0454083	0.0233532	0.831934	0.485624	0.783517	0.805616	0.659761	0.0627603	0.832978	0.127645	0.172056
MAP4K4	1.72	1.1893	2.49712	0.000107286	0.028903	1.9447e-05	0.582552	0.702323	0.763468	0.00266472	0.779848	0.31656	0.108717	0.585805
RAB38	1.69	1.28697	2.22461	0.206401	0.000412746	0.195577	0.359236	0.619194	0.0511465	0.0201568	0.108148	0.296628	0.0698171	0.957848
DKK1	1.58	1.21744	2.05676	3.09717e-10	0.0888221	0.0514258	0.011987	0.0483971	0.817758	0.0599289	0.135482	0.105545	0.299625	0.676157
RGL3	1.58	1.11075	2.24517	1.79299e-06	0.804489	0.41311	0.322587	0.0541486	0.749538	0.298658	0.14336	0.280857	0.983868	0.507059
IL1RAP	1.57	1.0908	2.24957	0.00828333	1.4937e-05	0.973742	0.442769	0.296338	0.120252	0.989883	0.0648085	0.236803	0.942983	0.748567
ANKRD1	1.55	1.02333	2.35068	0.385018	0.0550163	0.00676233	0.600129	0.58975	0.3366	0.0442943	0.891959	0.952534	0.0699192	0.342242
MC5R	1.55	1.1882	2.0208	1.3303e-05	0.738481	0.0481398	0.9893	0.75445	0.412226	0.244649	0.644504	0.0669092	0.225534	0.668238
KRT17	1.54	1.14457	2.08294	0.0420424	0.00227019	0.568443	0.539753	0.667156	0.415992	0.0276449	0.0437507	0.878453	0.0978559	0.665378
CYP26B1	1.53	1.08796	2.15012	0.206229	0.306427	0.415902	0.945487	0.410119	0.771519	0.097531	0.391104	0.779608	0.00405742	0.631793
PLK2	1.53	1.13247	2.05579	1.3694e-06	0.46529	0.14189	0.782354	0.537651	0.738524	0.463794	0.300757	0.894957	0.459717	0.538711
IL20RB	1.52	1.21499	1.89223	0.226613	0.0020479	0.402052	0.839925	0.629379	0.763757	0.159819	0.000168566	0.674262	0.104897	0.217998
SRGAP1	1.51	1.05402	2.15375	0.00971341	0.33707	0.00617399	0.424689	0.853606	0.0809542	0.10404	0.51625	0.338123	0.812806	0.32026
MPP3	1.51	1.15714	1.96887	0.238361	0.231078	0.183302	0.177399	0.143306	0.798864	0.915586	0.0585416	0.592991	0.501871	0.308599
HRH1	1.5	1.05262	2.13221	0.114206	0.0497786	0.0287143	0.78569	0.156085	0.596614	0.0095369	0.287884	0.939909	0.037707	0.591909
DGKA	1.5	1.11045	2.0374	0.460272	0.000238263	0.39744	0.781382	0.166729	0.314265	0.773793	0.253286	0.666598	0.0748273	0.941248
ZSWIM4	1.5	1.03957	2.16166	0.00197898	0.550333	0.0231122	0.213615	0.69698	0.375666	0.0329373	0.565014	0.293545	0.5822	0.866169
GPR87	1.49	1.21101	1.83756	0.00174304	0.756125	0.222951	0.215074	0.0443651	0.867618	0.44995	6.77435e-05	0.418112	0.154899	0.403016
ZNF365	1.49	1.11846	1.99403	0.00234775	2.58349e-05	1.63511e-05	0.181205	0.208692	0.247902	0.00542188	0.23727	0.867716	0.0251454	0.594162
EREG	1.48	1.11279	1.96255	0.204977	0.00918549	0.336887	0.273117	0.718977	0.932916	0.0183921	0.334499	0.501303	0.0460732	0.604366
TLR2	1.48	1.01188	2.17462	0.00971529	0.442037	0.030322	0.216086	0.450095	0.978783	0.0179214	0.680472	0.210789	0.0162938	0.186085
SKAP1	1.48	1.18416	1.84493	0.00360094	0.973668	0.132669	0.370443	0.854259	0.449317	0.351737	0.374608	0.727096	0.181612	0.14562
CNIH3	1.47	1.14704	1.88222	0.00461937	0.000211816	1.28957e-06	0.148927	0.507139	0.500468	0.000347818	0.322242	0.170602	0.0284164	0.461205
RGS20	1.47	1.21027	1.77422	1.35745e-07	0.660599	0.0749133	0.670283	0.182944	0.62623	0.107647	0.00729831	0.329497	0.0122122	0.606949
ANXA1	1.47	1.10452	1.96012	0.0652789	0.000375165	0.0136216	0.416908	0.20389	0.211697	0.0611295	0.194976	0.847058	0.0400964	0.920624
CYP24A1	1.47	1.13235	1.91082	0.000618298	0.000509659	0.605767	0.461001	0.209147	0.291445	0.150107	0.0376293	0.823305	0.241783	0.400978
ASB11	1.47	1.01981	2.11981	0.00571388	0.258683	0.81322	0.962613	0.0765465	0.267307	0.658799	0.332421	0.193628	0.60324	0.583445
PPP1R1C	1.45	1.14405	1.8442	0.0155553	0.153539	0.158421	0.472248	0.00261343	0.795476	0.0718672	0.00131318	0.0299326	0.0575001	0.435965
GPR78	1.45	1.15461	1.82115	0.0268582	0.736682	0.329841	0.311066	0.283235	0.988902	0.512831	1.59619e-05	0.804593	0.202871	0.545728
MDFI	1.45	1.03698	2.03811	0.0889129	0.00241774	0.606756	0.5879	0.206258	0.325063	0.0916759	0.233756	0.875524	0.272541	0.936803
TBX15	1.44	1.13358	1.83084	0.0184854	0.437426	0.021855	0.691702	0.357251	0.824574	0.00504994	0.55679	0.768621	0.00739973	0.948076
TRPV4	1.44	1.0281	2.00974	0.0984275	0.80174	0.021953	0.269942	0.0114877	0.0483805	0.142722	0.0746821	0.722167	0.443142	0.795137
OPN3	1.43	1.11007	1.83966	0.22709	0.000634276	0.0456136	0.529707	0.254492	0.848177	0.111146	0.311613	0.0669781	0.0442099	0.893763
GUCA1C	1.43	1.02823	1.99393	0.000191502	0.0626159	0.286166	0.220893	0.308608	0.631762	0.0265635	0.460944	0.571531	0.847562	0.416051
IRX4	1.43	1.09133	1.88025	1.40235e-06	0.0401993	0.00586161	0.503373	0.687444	0.106098	0.0106824	0.120717	0.565134	0.0720719	0.892144
HOMER2	1.43	1.00166	2.04386	1.12073e-05	0.0694373	0.676474	0.118609	0.423181	0.236052	0.797754	0.61714	0.454648	0.868978	0.799978
EDN1	1.42	1.08894	1.84056	3.47709e-05	0.000429809	0.0218316	0.436209	0.368436	0.271344	0.290806	0.522838	0.621769	0.0979874	0.224246
ARHGAP40	1.42	1.07362	1.86808	2.64647e-07	0.294829	0.412206	0.764807	0.0150712	0.452896	0.659238	0.0216827	0.139086	0.48566	0.643323
VGLL1	1.42	1.1065	1.82737	2.8499e-06	0.00259551	0.526297	0.585692	0.0221302	0.29087	0.703382	0.015148	0.340602	0.940797	0.316568
PPIC	1.41	1.10012	1.79657	0.12888	0.397475	0.00865316	0.352907	0.478793	0.976401	0.0824585	0.657504	0.619519	0.453265	0.448365
PXN	1.41	1.0632	1.8825	0.0796542	0.720051	0.119005	0.77024	0.680945	0.262897	0.261374	0.932764	0.815122	0.322414	0.899349
CD59	1.39	1.07896	1.78323	0.634101	0.0218259	0.647215	0.0770199	0.107297	0.587907	0.589081	0.382529	0.271468	0.356414	0.968401
WNT5A	1.38	1.00179	1.90562	0.233077	0.76048	0.0641051	0.6688	0.491711	0.362871	0.243505	0.70349	0.753799	0.0724336	0.518058
NCK1	1.38	1.01015	1.89753	0.150979	1.87243e-07	0.00213493	0.979731	0.0180932	0.0972065	0.117378	0.0182066	0.737361	0.228135	0.57432
AFP	1.38	1.02895	1.84112	0.0254582	1.25932e-05	0.367598	0.584493	0.000539462	0.504861	0.415188	0.0049769	0.00386512	0.313935	0.828791
PRKG2	1.38	1.11502	1.70768	0.00516075	0.032902	0.661227	0.504626	0.898419	0.894398	0.215154	0.0438577	0.615491	0.400939	0.0953635
CLIC3	1.38	1.08316	1.77085	0.569406	0.090172	0.444249	0.123656	0.0589123	0.765162	0.106106	0.0528034	0.632889	0.640255	0.946905
APLP2	1.38	1.04244	1.82825	4.09374e-06	0.152779	0.0493604	0.364708	0.618703	0.398707	0.453455	0.63955	0.494759	0.833453	0.856902
IL1RL2	1.37	1.09427	1.71993	0.00162795	3.72652e-09	0.748386	0.321301	0.0716715	0.227206	0.773897	0.0220402	0.11404	0.69721	0.0746588
EN1	1.37	1.08009	1.7374	0.020297	0.000175487	0.000387089	0.105279	0.820845	0.190759	0.0115804	0.241424	0.484576	0.0178774	0.191442
RARG	1.37	1.04163	1.7888	0.742381	0.4701	0.986639	0.0270053	0.196473	0.440409	0.113434	0.448825	0.94196	0.817207	0.322256
CCR3	1.36	1.01511	1.81349	0.172388	0.14733	0.0225389	0.208411	0.212711	0.826224	0.403797	0.302582	0.192943	0.0874223	0.573723
MGLL	1.36	1.07072	1.71669	0.0468558	0.0148301	0.326462	0.404597	0.886171	0.825589	0.76668	0.95511	0.759913	0.346095	0.738682
PRRX2	1.36	1.0702	1.73044	0.000122066	0.107008	0.0119249	0.0691606	0.47565	0.509135	0.0178092	0.40883	0.649843	0.0909062	0.285014
CABP4	1.36	1.08716	1.70441	2.42454e-08	0.5781	0.460355	0.640545	0.164185	0.905965	0.666208	0.238447	0.513626	0.407603	0.306062
FOXG1	1.36	1.12073	1.65872	0.000274836	0.668791	0.092336	0.952012	0.501919	0.499655	0.0570077	0.0040045	0.903893	0.306291	0.23479
CABYR	1.36	1.07945	1.71225	8.71052e-14	0.00308096	0.0023234	0.226915	0.875828	0.112728	0.00360901	0.626437	0.232371	0.0329059	0.97806
CRABP2	1.35	1.01449	1.79615	5.44653e-05	0.418415	0.0894304	0.235188	0.305489	0.356735	0.0248986	0.681728	0.148852	0.0266394	0.716715
RAP2B	1.35	1.06203	1.70371	7.54657e-05	0.681066	0.378046	0.632051	0.828532	0.881122	0.32057	0.71185	0.190208	0.768083	0.268591
PAX9	1.35	1.03556	1.75354	4.90328e-06	0.00293389	0.712899	0.0265993	0.0529529	0.246994	0.150015	0.00304736	0.901	0.101902	0.612223
TBX6	1.35	1.02047	1.79344	6.18083e-06	0.133234	0.109254	0.0393007	0.0215585	0.394577	0.271319	0.0666144	0.606464	0.927005	0.700425
IL1A	1.34	1.00743	1.79118	0.00473783	9.07142e-05	0.696167	0.0486656	0.0144688	0.100636	0.152674	0.0270828	0.914548	0.0183985	0.803884
POU3F2	1.34	1.09242	1.63275	7.8271e-06	0.221112	0.015807	0.973604	0.535725	0.292479	0.0169687	0.85276	0.341479	0.0900362	0.868305
FGF19	1.34	1.07452	1.66061	0.000426037	0.0167334	0.0862695	0.72293	0.625693	0.542608	0.02493	0.592768	0.216141	0.125767	0.865573
EPOR	1.34	1.06752	1.69337	0.000569685	0.960584	0.10053	0.335739	0.0206479	0.487611	0.023048	0.0228701	0.255933	0.593419	0.811845
CELSR1	1.34	1.0643	1.69816	0.00092448	0.046074	0.529774	0.952446	0.254463	0.428602	0.774149	0.218989	0.523601	0.825091	0.63383
TFAP2E	1.33	1.04459	1.69074	0.642247	2.76578e-06	0.294958	0.257926	0.870442	0.636523	0.557041	0.14497	0.758288	0.739923	0.679791
EGR4	1.33	1.03308	1.70675	0.0330532	0.000496157	0.0838843	0.444914	0.264409	0.852553	0.473953	0.16547	0.699402	0.914103	0.155718
KCNH8	1.33	1.00144	1.77961	1.36653e-06	0.729819	0.446695	0.811403	0.0817946	0.27737	0.58517	0.202046	0.238516	0.51947	0.883947
ANXA5	1.33	1.0452	1.69103	0.213244	6.57913e-05	0.0529042	0.0450906	0.967	0.0821814	0.0337372	0.274402	0.441471	0.00697379	0.123144
HOXA1	1.33	1.07726	1.6474	2.6954e-07	0.0334155	0.546375	0.96474	0.719608	0.943843	0.209495	0.309897	0.19551	0.89689	0.728328
PAX2	1.33	1.07694	1.65393	0.000206956	0.102219	0.00120974	0.865997	0.221416	0.728004	0.00107206	0.296677	0.0238261	0.650177	0.783177
LMO4	1.32	1.03991	1.68777	0.0525109	1.93709e-05	0.316482	0.155685	0.354883	0.142642	0.0879707	0.83098	0.488792	0.947402	0.55025
SHOX2	1.32	1.03902	1.66763	2.41046e-05	0.243778	0.0929632	0.99127	0.609755	0.30629	0.299394	0.303861	0.879659	0.253797	0.384615
GNGT1	1.32	1.06042	1.63457	8.82842e-08	0.361846	0.539626	0.925545	0.517951	0.944537	0.163533	0.629379	0.321654	0.48544	0.519018
ZNF648	1.31	1.05773	1.62855	8.88511e-06	0.317956	0.601822	0.731817	0.193432	0.658422	0.349718	0.291772	0.810439	0.962079	0.500359
ACVR1	1.31	1.03351	1.64814	0.000156188	1.4545e-08	0.0279478	0.00317769	0.9313	0.867009	0.277293	0.611616	0.341512	0.952438	0.166283
GPR1	1.31	1.02013	1.68177	0.0836367	3.34808e-07	2.40252e-07	0.0466104	0.193863	0.448054	0.000198301	0.377452	0.767529	0.0229619	0.26315
FOXL2	1.31	1.06926	1.61357	5.94315e-06	0.0213294	0.247776	0.577016	0.311467	0.720364	0.101262	0.663454	0.188539	0.141444	0.711964
BNC1	1.31	1.0589	1.61181	0.00103517	0.0286154	0.0180059	0.296097	0.927548	0.18298	0.0805215	0.00259132	0.78257	0.0966078	0.705084
CHRNB1	1.31	1.04753	1.64568	0.000478566	0.10443	0.531496	0.232487	0.918007	0.851338	0.10991	0.65343	0.591923	0.15036	0.235129
TACSTD2	1.3	1.00605	1.66966	0.0438179	1.12429e-06	0.349581	0.83493	0.0056167	0.12483	0.464525	8.4548e-05	0.779035	0.97429	0.190508
SIX3	1.3	1.0442	1.61706	0.492615	0.00545506	0.739032	0.326307	0.246338	0.815411	0.831368	0.21029	0.925618	0.307393	0.216633
EPGN	1.3	1.01831	1.67021	0.568196	0.402169	0.332557	0.242434	0.782005	0.140285	0.521171	0.000369933	0.939311	0.0854338	0.494894
PDGFC	1.3	1.04833	1.60149	0.0175594	4.91447e-10	8.76513e-05	0.0125406	0.267571	0.444902	0.046575	0.247324	0.788163	0.350971	0.239311
ANK1	1.3	1.02592	1.64485	0.00310795	4.1618e-05	0.838232	0.130908	0.614037	0.81356	0.137524	0.881794	0.696373	0.510143	0.787521
SIX4	1.3	1.01522	1.66097	0.0201449	0.00182718	0.0122867	0.0376118	0.965071	0.473658	0.152362	0.923841	0.768951	0.205164	0.915883
EFNB3	1.3	1.04202	1.62659	4.24567e-05	0.012034	0.00677805	0.0476762	0.606122	0.709331	0.0985721	0.902995	0.639721	0.0539018	0.765379
ITGB6	1.29	1.01119	1.64622	0.00201963	0.0055998	0.465464	0.896934	0.658211	0.474467	0.213437	0.187442	0.0585757	0.922319	0.13057
STK17B	1.29	1.03101	1.61655	0.00767596	0.000333194	0.000445382	0.471987	0.0100372	0.425364	0.0738614	0.0687997	0.667799	0.645361	0.964738
PTH2R	1.29	1.02973	1.62521	4.9298e-09	0.0122234	0.194766	0.324473	0.471803	0.294065	0.16884	0.756367	0.1891	0.189763	0.515134
BHLHE40	1.29	1.01064	1.64469	8.32453e-05	0.482217	0.712847	0.946801	0.70807	0.879723	0.571142	0.464977	0.83338	0.433848	0.731636
PTGES	1.29	1.00854	1.64057	0.000180838	0.000363168	0.0497721	0.0527232	0.780378	0.652582	0.114406	0.747749	0.889122	0.272171	0.212819
FOXN1	1.29	1.00513	1.64521	0.00488491	1.63115e-05	0.0326903	0.506237	0.0464569	0.409561	0.744887	0.000563017	0.445443	0.975859	0.248366
ECM1	1.28	1.03453	1.58087	0.266352	0.465347	0.0228931	0.57064	0.0933006	0.6763	0.0348923	0.00505942	0.850305	0.0478025	0.643392
DCDC2	1.28	1.00785	1.63573	4.7015e-06	0.0463809	0.16877	0.486323	0.0562184	0.812061	0.767674	0.216094	0.0149656	0.956356	0.801313
RASGEF1A	1.28	1.04512	1.57257	4.33883e-05	0.185858	0.354157	0.987134	0.54174	0.595921	0.300259	0.485361	0.212173	0.751562	0.748466
GUCY2D	1.28	1.05027	1.54922	0.000632917	0.111098	0.767799	0.670458	0.0978635	0.75272	0.263264	0.409955	0.526596	0.127914	0.351082
S1PR5	1.28	1.01117	1.62237	0.00188326	0.00364908	0.00668782	0.0182411	0.0925531	0.359292	0.0600641	0.289018	0.550242	0.237799	0.670096
SEC31A	1.27	1.01735	1.58899	0.0889578	5.85957e-07	0.101708	0.166955	0.493123	0.0986383	0.440258	0.71335	0.497848	0.575904	0.95786
KEL	1.27	1.02488	1.57939	1.04682e-05	4.88247e-07	0.00705842	0.572815	0.425644	0.0688972	0.33895	0.79997	0.981594	0.200505	0.682864
OR1Q1	1.27	1.0029	1.60209	0.293208	7.21582e-07	0.457114	0.0700138	0.576037	0.50671	0.687362	0.627589	0.761497	0.728361	0.00492334
CERS3	1.27	1.00962	1.60233	0.000966274	0.202803	0.488525	0.871564	0.63041	0.329055	0.137532	0.0362746	0.826133	0.236362	0.0703689
DUSP9	1.27	1.03281	1.56778	0.153072	0.000124001	0.547322	0.0775087	0.140934	0.816728	0.00601535	0.157994	0.161879	0.094344	0.658178
TACR3	1.26	1.00585	1.58521	0.0492083	0.693589	0.253773	0.605163	0.837818	0.305233	0.452857	0.512681	0.739425	0.293745	0.536937
RGS17	1.26	1.00719	1.56445	4.43954e-05	0.00135266	0.0295675	0.723944	0.0586584	0.13638	0.205407	0.217873	0.920587	0.188488	0.778902
NLRP12	1.26	1.00739	1.57635	5.62614e-06	0.00110536	0.0501487	0.283057	0.519265	0.351679	0.261197	0.33805	0.707954	0.120154	0.337163
PRAME	1.26	1.0243	1.55226	0.737232	0.000325781	0.737383	0.50569	0.181188	0.73042	0.117376	0.535691	0.316658	0.166451	0.219395
CALCR	1.25	1.00588	1.55952	2.03422e-07	1.06301e-05	0.00115128	0.49652	0.628452	0.292748	0.0132499	0.945238	0.796991	0.515068	0.749247
CAV2	1.25	1.02414	1.51688	0.0192219	1.48543e-10	0.000353887	0.150445	0.094023	0.0267905	0.1595	0.147211	0.917854	0.260744	0.205729
GLIS3	1.25	1.01366	1.55231	2.68587e-05	1.17468e-10	0.00116063	0.00960209	0.466917	0.415702	0.100355	0.424416	0.780337	0.311124	0.322463
GDF3	1.25	1.01244	1.54328	1.61461e-06	1.04622e-06	0.00684969	0.0472376	0.181154	0.314764	0.274855	0.17186	0.904061	0.0753896	0.192827
ITGA2B	1.25	1.0041	1.55341	2.04248e-06	0.290749	0.0436422	0.758374	0.347152	0.143215	0.117181	0.592737	0.61718	0.168837	0.559577
LIN28B	1.23	1.02803	1.46693	0.000199231	0.0910415	0.841889	0.933995	0.617222	0.338177	0.274926	0.940408	0.932776	0.207739	0.254993
DLX3	1.23	1.00318	1.5064	8.98442e-06	0.0278743	0.603985	0.601128	0.364408	0.522762	0.174276	0.552254	0.141508	0.483995	0.893256
PAX1	1.23	1.00325	1.51997	0.401705	0.000170096	0.969359	0.180177	0.478442	0.262352	0.0353639	0.291703	0.830537	0.0897686	0.163938
SOHLH1	1.21	1.0005	1.46683	0.0355623	0.000183181	0.920055	0.380984	0.617151	0.699415	0.172292	0.911243	0.354626	0.280956	0.728597
ADAMTS20	1.19	1.00132	1.42189	0.00246342	0.027224	0.96465	0.706422	0.484579	0.696111	0.242553	0.862441	0.733454	0.286705	0.149659
AKAP4	0.81	0.654845	0.994039	0.0462998	7.22593e-10	0.306935	0.00670012	0.256411	0.139017	0.664945	0.481923	0.857806	0.801648	0.791576
CAMKK2	0.8	0.641904	0.991897	0.547995	0.0783394	0.270931	0.00711821	0.908714	0.167682	0.932263	0.833502	0.229058	0.220131	0.76788
YBX2	0.8	0.650824	0.980058	0.00389982	2.10664e-12	0.00747543	0.0634234	0.531882	0.154125	0.0621623	0.808803	0.480056	0.872428	0.613176
UNC13B	0.79	0.638702	0.984042	0.0299985	0.17833	0.0127783	0.15065	0.30947	0.190106	0.0266282	0.400095	0.516233	0.0971	0.202839
ASB6	0.78	0.618336	0.987713	0.000195194	0.0135777	0.172037	0.869181	0.246908	0.939622	0.332874	0.593115	0.356479	0.58405	0.398369
SF1	0.78	0.610201	0.990281	9.28193e-05	1.60503e-05	0.479288	0.770941	0.243111	0.133761	0.957499	0.643877	0.903761	0.315661	0.72042
ADCY6	0.78	0.609145	0.99517	0.814333	0.00759542	0.260693	0.0425839	0.495462	0.00660596	0.190739	0.620653	0.729324	0.03849	0.282223
AXIN2	0.78	0.631756	0.963647	0.0012422	0.106626	0.922236	0.607921	0.698535	0.549233	0.284522	0.823217	0.399438	0.140156	0.24523
SAFB	0.78	0.60891	0.989166	0.00177291	4.6309e-08	0.399546	0.361336	0.650197	0.187168	0.79483	0.689949	0.662768	0.537892	0.294455
ZNF526	0.78	0.612308	0.98601	0.0262111	0.00746219	0.143659	0.636124	0.0164337	0.14479	0.312148	0.118133	0.498067	0.951699	0.513594
PPARA	0.78	0.614442	0.989408	0.704477	0.82882	0.133675	0.206956	0.208553	0.652078	0.0178534	0.479777	0.829693	0.141384	0.659939
LIMD1	0.77	0.602804	0.995401	0.0304358	0.71683	0.131676	0.359203	0.87873	0.169817	0.314196	0.737836	0.264327	0.086422	0.394023
SLC12A2	0.77	0.609122	0.986033	2.7635e-05	0.108636	0.142798	0.0620543	0.100986	0.329569	0.0926932	0.349916	0.910797	0.640554	0.650131
ASCL2	0.77	0.599353	0.980351	0.40271	1.34308e-07	0.0972616	0.084046	0.94223	0.0331058	0.285566	0.963784	0.264776	0.463735	0.804042
GPHN	0.77	0.60115	0.977315	8.42147e-14	4.05333e-07	0.0193007	0.00493559	0.573338	0.573149	0.0386812	0.800874	0.609032	0.894555	0.695358
PDK3	0.77	0.601377	0.989298	0.0951972	0.000243363	0.264552	0.709054	0.111171	0.977311	0.26448	0.395181	0.678107	0.730241	0.653068
PPARGC1B	0.76	0.601648	0.962735	0.0374766	0.187057	0.325313	0.635752	0.063116	0.837528	0.102473	0.100812	0.680109	0.246609	0.89492
PATZ1	0.76	0.589878	0.975035	0.454043	0.0341415	0.680047	0.140507	0.688067	0.17254	0.535546	0.553998	0.166204	0.408957	0.641776
RABL2B	0.76	0.585317	0.97535	0.0479669	0.00717474	0.589509	0.243265	0.601573	0.975487	0.728495	0.64629	0.945789	0.591758	0.123561
RBBP7	0.76	0.590127	0.988724	6.92036e-06	0.00186244	0.396193	0.022074	0.50433	0.336837	0.582196	0.904938	0.665469	0.629541	0.685212
DFFB	0.75	0.59611	0.934379	1.36372e-11	1.33962e-06	0.00807217	0.00493751	0.210275	0.212556	0.0605659	0.37812	0.565318	0.521263	0.355336
TMED4	0.75	0.582351	0.976413	0.00956996	1.99245e-09	0.0274307	0.446413	0.0300423	0.0825477	0.420671	0.0369987	0.85368	0.227445	0.363744
NRF1	0.75	0.577064	0.972956	0.873053	0.137694	0.492429	0.423728	0.784923	0.341	0.949071	0.912053	0.543766	0.512529	0.885295
RPL7	0.75	0.563921	0.993614	0.00088408	0.312692	0.672709	0.378961	0.698966	0.67566	0.537011	0.631204	0.502548	0.342006	0.842179
TBC1D13	0.75	0.580493	0.962768	0.00112023	0.0668867	0.0326469	0.101124	0.296169	0.234537	0.12928	0.450699	0.478072	0.296105	0.402895
EHMT1	0.75	0.58159	0.962682	0.122306	0.00986233	0.345525	0.334636	0.221248	0.0405913	0.68285	0.562186	0.22512	0.118694	0.534706
ZNF263	0.75	0.575614	0.97413	0.115149	0.512852	0.76169	0.432827	0.483267	0.189019	0.619956	0.858415	0.283855	0.324109	0.628717
BRD7	0.75	0.580714	0.972308	0.00336741	0.0246005	0.453507	0.64596	0.988856	0.687534	0.906421	0.981433	0.919133	0.532241	0.990348
SAFB2	0.75	0.576614	0.988531	0.798608	0.0265041	0.0442918	0.455738	0.929958	0.254202	0.00565887	0.798767	0.0324924	0.0470149	0.659776
ILF3	0.75	0.571817	0.985468	0.000378685	8.12507e-07	0.628507	0.065778	0.889242	0.242824	0.946697	0.942445	0.813504	0.712931	0.468357
CSNK2A1	0.75	0.582068	0.97374	0.000427961	6.49413e-06	0.288326	0.912866	0.223064	0.204394	0.38816	0.603901	0.790767	0.0822296	0.257593
PPP2R5D	0.74	0.605526	0.91135	1.57647e-05	4.93753e-09	0.00297678	0.362576	0.0257851	0.0598048	0.197453	0.110717	0.896808	0.075274	0.960794
ZNF212	0.74	0.575717	0.950508	0.584068	0.00127809	0.40483	0.529313	0.157841	0.025991	0.142624	0.471385	0.299658	0.0145495	0.648003
PTK2	0.74	0.580668	0.94621	0.000374993	1.78918e-08	0.00389963	0.066788	0.805887	0.589575	0.0811559	0.398371	0.702427	0.391869	0.271113
PDCD11	0.74	0.554499	0.998982	1.06139e-05	8.92434e-09	0.156726	0.0952007	0.432961	0.164834	0.401991	0.823452	0.959292	0.830864	0.525178
DUSP8	0.74	0.57863	0.942531	0.145315	0.0879611	0.4647	0.418742	0.359625	0.208913	0.665238	0.684568	0.203099	0.443656	0.282661
ZNF740	0.74	0.570859	0.962516	0.0352055	0.00569361	0.315889	0.163883	0.419639	0.449595	0.410151	0.558773	0.102898	0.46004	0.563516
TERF2	0.74	0.552263	0.995078	0.00358895	0.0210758	0.748328	0.330462	0.304715	0.106343	0.534942	0.777629	0.564813	0.37931	0.726483
TAF15	0.74	0.561923	0.981171	0.0118533	0.008156	0.0409321	0.465192	0.2905	0.664062	0.0783919	0.673208	0.458864	0.16094	0.565138
HCFC1	0.74	0.547995	0.991125	0.2064	0.00778715	0.565072	0.285715	0.867723	0.0506345	0.578772	0.790567	0.263925	0.0829982	0.543621
MAVS	0.73	0.55762	0.96018	0.0372512	0.277843	0.347634	0.6982	0.160076	0.071949	0.0978966	0.247253	0.156016	0.0157607	0.614613
HIRA	0.73	0.561525	0.940641	0.000205472	6.78371e-08	0.141073	0.330019	0.584041	0.184176	0.83152	0.654712	0.779346	0.477859	0.688802
EPHB2	0.72	0.530228	0.989795	0.100871	2.30458e-09	0.525551	0.0145112	0.555074	0.0143541	0.408443	0.936102	0.496688	0.673359	0.931754
TBC1D14	0.72	0.563037	0.91332	0.0029159	0.501108	0.115517	0.395035	0.361399	0.246566	0.0264436	0.547422	0.45244	0.498541	0.664653
ZNF517	0.72	0.532885	0.963115	0.00256873	0.618057	0.758545	0.368913	0.810722	0.320349	0.226414	0.927784	0.103924	0.0880771	0.695344
WNK2	0.72	0.555607	0.932091	0.0241304	0.149385	0.0842917	0.915082	0.506556	0.934282	0.100079	0.74154	0.057273	0.568825	0.643422
NUP214	0.72	0.548717	0.933515	0.309019	0.0045977	0.358178	0.252354	0.71394	0.0895348	0.229278	0.610726	0.541713	0.352166	0.210531
ZNF74	0.72	0.560885	0.935839	0.309964	5.21521e-05	0.85137	0.799418	0.672556	0.149614	0.925647	0.950285	0.204427	0.230338	0.946935
DEPTOR	0.71	0.536228	0.951594	0.0023166	0.0268099	0.0953313	0.279506	0.988813	0.416269	0.0932179	0.648635	0.954883	0.100589	0.624234
SMARCC2	0.71	0.540198	0.93832	0.543876	0.286794	0.0888247	0.344656	0.524982	0.183888	0.129009	0.753644	0.460843	0.0163519	0.360632
AMER1	0.71	0.555754	0.919171	0.207614	0.182761	0.219626	0.720649	0.845505	0.256673	0.571931	0.894619	0.370906	0.198716	0.758012
MAP3K15	0.7	0.536542	0.905189	0.000492169	0.00805929	4.99358e-05	0.4392	0.917619	0.665048	0.0307397	0.455251	0.67332	0.648031	0.622578
CASZ1	0.69	0.499399	0.947206	0.204709	0.129682	0.000779288	0.843763	0.85251	0.337374	0.00433591	0.312016	0.620927	0.0164633	0.396125
ZFP41	0.69	0.528817	0.893444	0.473633	4.36731e-06	0.0427275	0.960866	0.150483	0.199586	0.0939234	0.278633	0.160922	0.0672705	0.530944
ZNF696	0.69	0.530424	0.902164	0.0816837	2.49417e-08	0.159413	0.31708	0.97391	0.0538928	0.498231	0.754036	0.259195	0.0871743	0.788047
FBXO31	0.69	0.533942	0.902359	0.106489	0.00064626	0.433405	0.0114869	0.615639	0.703117	0.337537	0.215965	0.0708315	0.332023	0.0951355
THRA	0.69	0.484622	0.979161	5.96037e-06	0.485003	0.0616841	0.0895586	0.476239	0.345717	0.245541	0.640136	0.552543	0.154378	0.717699
ACIN1	0.67	0.523546	0.853761	0.105487	1.61915e-05	0.119143	0.125068	0.56951	0.00739753	0.457696	0.764301	0.946031	0.085555	0.78876
ARHGAP33	0.52	0.358281	0.768306	0.829965	0.00437012	0.237952	0.572893	0.901597	0.0844968	0.471487	0.89958	0.0780185	0.0757173	0.75382
