# Supplementary material for: Gene Regulatory Network Characterization of Gastric Cancer’s Histological Subtypes: Distinctive Biological and Clinically Relevant Master Regulators
Source: Cancers (Basel). 2022 Oct 10;14(19):4961. doi: 10.3390/cancers14194961 (PMC9563962; doi:10.3390/cancers14194961)
Supplement: Supplementary file 1 [file cancers-14-04961-s001.zip › FileS7.xlsx]

## Sheet: OS.ACRG
row.names	HR	low	high
Name
AATF	0.82	0.690109	0.980949
ABCA1	1.34	1.12582	1.58655
ABCC9	1.52	1.32011	1.75775
ABCG1	1.38	1.1673	1.63961
ABI1	0.7	0.604459	0.800036
ABLIM3	1.55	1.32669	1.80898
ABT1	0.71	0.60562	0.837396
ACAD8	0.68	0.584138	0.802425
ACKR1	1.46	1.25026	1.69869
ACKR3	1.28	1.09347	1.49564
ACOT11	0.82	0.693976	0.974843
ACTL6A	0.76	0.650703	0.889394
ACTN2	1.48	1.30938	1.67725
ACTR5	0.73	0.617241	0.862698
ACVR1	1.36	1.13136	1.63781
ACVR1B	0.75	0.63459	0.880328
ACVRL1	1.34	1.14899	1.57121
ADA	0.75	0.634832	0.893014
ADAM10	0.66	0.566751	0.762251
ADAM9	0.71	0.615284	0.817824
ADAMTS1	1.45	1.24461	1.69187
ADAP1	0.71	0.613357	0.832023
ADAP2	1.3	1.09728	1.53481
ADCY1	1.54	1.30681	1.81586
ADCY2	1.53	1.32953	1.76365
ADCY4	1.32	1.13474	1.53505
ADCY5	1.52	1.31833	1.74731
ADCY6	0.83	0.70244	0.972639
ADCYAP1	1.36	1.16235	1.60294
ADCYAP1R1	1.47	1.27911	1.68635
ADGRA2	1.48	1.27373	1.71958
ADGRD1	1.44	1.22858	1.6918
ADGRF1	0.76	0.655174	0.87861
ADGRG2	1.27	1.08769	1.49193
ADGRG7	0.74	0.628875	0.878901
ADGRL2	1.59	1.34552	1.86779
ADGRL4	1.36	1.16201	1.59074
ADH1A	1.33	1.13084	1.56853
ADIPOR1	0.8	0.679329	0.950893
ADIPOR2	0.76	0.655748	0.886584
ADNP2	0.69	0.588785	0.817064
ADORA1	1.27	1.08637	1.47411
ADORA2A	1.2	1.02275	1.40544
ADORA2B	0.78	0.660687	0.929251
ADORA3	1.32	1.11744	1.5648
ADRB2	1.48	1.2723	1.72039
AEBP1	1.41	1.21481	1.64662
AEN	0.69	0.587082	0.818694
AFAP1L2	1.53	1.28784	1.82734
AFDN	0.81	0.677451	0.964299
AFF1	1.34	1.13589	1.58421
AFF3	1.46	1.25701	1.70245
AFF4	1.32	1.10929	1.56116
AFP	0.84	0.702849	0.998217
AGAP11	1.42	1.2098	1.66388
AGAP7P	0.84	0.711149	0.98445
AGFG1	0.73	0.632004	0.838739
AGO2	0.77	0.646668	0.905205
AGPAT2	0.7	0.596058	0.810929
AGT	1.34	1.11389	1.61061
AGTR1	1.5	1.32061	1.71333
AHCTF1	0.79	0.672539	0.936764
AHR	0.75	0.654635	0.867877
AHRR	0.68	0.575304	0.798066
AIFM1	0.66	0.566942	0.769157
AIFM2	0.71	0.598789	0.830168
AIMP1	0.76	0.658982	0.885947
AJUBA	0.79	0.673732	0.934019
AKAP10	1.25	1.05982	1.4804
AKAP11	1.29	1.09331	1.53149
AKAP12	1.56	1.34834	1.80503
AKAP13	1.25	1.0606	1.47536
AKAP8	0.83	0.707917	0.981169
AKT1S1	0.83	0.701689	0.983529
AKT3	1.55	1.33668	1.79723
ALCAM	0.79	0.666837	0.924467
ALDH1A2	1.42	1.23563	1.6348
ANGPTL4	1.4	1.18479	1.66277
ANK2	1.52	1.32133	1.74425
ANKDD1A	1.51	1.31326	1.73566
ANKZF1	0.76	0.637085	0.907713
ANP32A	0.7	0.590904	0.830111
ANTXR1	1.34	1.1441	1.56351
ANXA3	0.78	0.671848	0.898544
ANXA4	0.72	0.624588	0.828431
ANXA5	1.48	1.2466	1.75503
ANXA9	1.23	1.04466	1.44602
APAF1	0.66	0.579074	0.754001
APBB1	1.56	1.36163	1.7984
APBB2	1.29	1.08261	1.53268
APEX1	0.75	0.635769	0.884437
APH1A	0.72	0.612177	0.836674
APH1B	1.55	1.31167	1.82876
APPL2	0.74	0.633538	0.854814
AR	1.5	1.31636	1.71952
ARF1	0.73	0.617016	0.852415
ARF3	0.76	0.639712	0.895308
ARF5	0.82	0.69922	0.972417
ARFGEF1	0.73	0.632461	0.849241
ARFGEF2	0.72	0.615139	0.841894
ARFGEF3	0.72	0.614636	0.846558
ARFIP2	0.71	0.604888	0.824885
ARHGAP1	1.29	1.08909	1.5223
ARHGAP10	1.48	1.29763	1.69087
ARHGAP11A	0.69	0.592657	0.806568
ARHGAP11B	0.75	0.628275	0.886772
ARHGAP12	0.69	0.593185	0.800748
ARHGAP15	1.25	1.05416	1.47915
ARHGAP18	0.69	0.605812	0.781426
ARHGAP20	1.52	1.31869	1.75512
ARHGAP22	1.44	1.2421	1.664
ARHGAP24	1.49	1.27201	1.75603
ARHGAP27	0.73	0.630022	0.855568
ARHGAP28	1.39	1.17445	1.65521
ARHGAP29	1.52	1.28295	1.80178
ARHGAP31	1.44	1.22954	1.69571
ARHGAP32	0.69	0.599041	0.806286
ARHGAP39	0.77	0.652708	0.902183
ARHGAP6	1.46	1.25976	1.6979
ARHGDIA	0.83	0.694483	0.983465
ARHGDIB	1.23	1.04489	1.45459
ARHGEF10	1.54	1.32547	1.78923
ARHGEF15	1.34	1.15633	1.54998
ARHGEF16	0.68	0.590146	0.787709
ARHGEF17	1.54	1.34028	1.77833
ARHGEF2	1.37	1.15793	1.62277
ARHGEF25	1.49	1.31063	1.69358
ARHGEF26	1.47	1.2724	1.68681
ARHGEF3	1.33	1.1237	1.56384
ARHGEF37	1.26	1.07154	1.4881
ARHGEF39	0.73	0.624708	0.857921
ARHGEF4	1.48	1.29294	1.69174
ARHGEF40	1.31	1.13231	1.52323
ARHGEF5	0.7	0.602373	0.810673
ARHGEF6	1.33	1.12562	1.57156
ARHGEF9	1.49	1.30785	1.70139
ARID1B	1.35	1.15154	1.57495
ARID3B	0.69	0.591327	0.798448
ARID4A	1.33	1.12657	1.57157
ARID5A	1.45	1.25341	1.68595
ARID5B	1.48	1.262	1.73996
ARL2BP	1.39	1.17185	1.65421
ARL3	1.45	1.26658	1.65132
ARL4C	1.29	1.10445	1.51106
ARL4D	1.54	1.35667	1.74222
ARL5B	0.69	0.592311	0.792345
ARL6	1.29	1.10025	1.52344
ARL8A	1.23	1.05013	1.4413
ARNT	1.47	1.24827	1.731
ARNT2	1.49	1.28432	1.72987
ARNTL2	0.75	0.638047	0.871007
ARRB1	1.28	1.09155	1.50957
ARTN	1.3	1.1239	1.5108
ASAH2B	0.74	0.619697	0.885982
ASAP1	1.4	1.18432	1.64479
ASAP2	0.72	0.615788	0.83254
ASAP3	1.45	1.22784	1.70489
ASB1	1.39	1.21256	1.59818
ASB2	1.45	1.24924	1.68864
ASB5	1.46	1.28816	1.64504
ASB7	0.82	0.693166	0.964984
ASB8	1.21	1.03019	1.42859
ASCC1	1.43	1.22328	1.67823
ASCC2	0.78	0.657255	0.914918
ASCC3	0.67	0.578793	0.775668
ASCL2	0.75	0.629589	0.897912
ASF1B	0.69	0.593898	0.793091
ASMTL	1.39	1.20529	1.61152
ASXL3	1.51	1.2982	1.75215
ATAD2	0.74	0.629289	0.862915
ATF1	0.72	0.617829	0.8367
ATF5	0.71	0.605314	0.839095
ATF7	1.48	1.28412	1.71355
ATF7IP	1.37	1.15896	1.60837
ATG10	1.37	1.15418	1.6193
ATIC	0.73	0.613414	0.858124
ATM	1.37	1.16026	1.61291
ATOH1	0.73	0.616908	0.857714
ATOH8	1.49	1.3063	1.70974
ATP2A2	0.69	0.596107	0.800304
ATP2C1	0.74	0.632737	0.855591
ATP8B1	0.71	0.613699	0.816214
ATR	0.74	0.632512	0.876473
ATRIP	0.74	0.629817	0.881246
ATRNL1	1.45	1.25066	1.68363
ATRX	1.44	1.24051	1.6669
ATXN1	1.51	1.30667	1.75227
ATXN3	1.44	1.25355	1.66168
AURKA	0.71	0.608336	0.818242
AURKB	0.72	0.620162	0.842557
AXIN1	0.78	0.651776	0.922331
AXL	1.46	1.24567	1.71569
B2M	0.83	0.71233	0.977932
BACH2	1.35	1.15852	1.5686
BAG1	0.72	0.622129	0.840095
BAG4	0.78	0.660755	0.916327
BAIAP2L1	0.72	0.628204	0.816211
BAIAP2L2	0.69	0.587452	0.806601
BAK1	0.69	0.595533	0.793423
BARD1	0.73	0.620912	0.859397
BARX1	1.52	1.3441	1.72629
BARX2	0.73	0.628934	0.850286
BASP1	1.3	1.10746	1.53419
BAZ1A	0.71	0.605779	0.840518
BAZ2A	0.73	0.628319	0.85669
BAZ2B	1.32	1.11601	1.55534
BBC3	0.73	0.614458	0.874872
BBX	1.43	1.21975	1.67659
BCL10	0.71	0.623589	0.811916
BCL2	1.33	1.13585	1.5539
BCL2L1	0.82	0.691477	0.967596
BCL3	0.79	0.66922	0.940582
BCL6	1.48	1.28131	1.71587
BCL6B	1.33	1.14837	1.53647
BCLAF1	0.71	0.606163	0.829686
BDKRB1	1.41	1.20845	1.64073
BEX3	1.58	1.36054	1.84022
BHLHE22	1.45	1.2398	1.69377
BID	0.72	0.624232	0.831757
BIRC7	0.83	0.706821	0.983451
BLM	0.71	0.606031	0.827359
BMP4	1.22	1.02307	1.44734
BMPR1A	1.43	1.25906	1.63206
BMPR1B	1.51	1.32198	1.72969
BMPR2	1.4	1.17965	1.65762
BMX	1.38	1.1885	1.60568
BNC2	1.49	1.27926	1.73449
BNIP3	1.53	1.31171	1.77442
BRAF	1.26	1.05884	1.48889
BRAP	0.76	0.644773	0.892709
BRCA1	0.73	0.621312	0.85837
BRCA2	0.72	0.615972	0.849569
BRCC3	0.71	0.607829	0.828952
BRIP1	0.71	0.609223	0.831029
BRPF1	0.8	0.675912	0.943115
BSG	0.74	0.62427	0.872869
BTG2	1.38	1.19436	1.59622
BTRC	1.35	1.14351	1.58629
BUB1B	0.72	0.613556	0.839253
BUD31	0.81	0.690028	0.948382
BZW1	0.78	0.673281	0.908463
C1QBP	0.69	0.59066	0.805165
CABYR	1.6	1.35745	1.88505
CACNA1A	1.31	1.11545	1.53152
CACNB4	1.36	1.16357	1.59944
CAD	0.82	0.690531	0.96269
CALCRL	1.34	1.14534	1.571
CALM1	1.38	1.20784	1.57947
CALR	0.71	0.620187	0.823266
CAMK1	1.52	1.31768	1.74514
CAMK4	1.2	1.00932	1.41708
CAMLG	1.34	1.1535	1.55828
CAMTA1	1.22	1.04558	1.43386
CAMTA2	1.36	1.16958	1.58136
CAND1	0.75	0.643242	0.872289
CAND2	1.53	1.3433	1.74787
CANT1	0.67	0.579162	0.776662
CAP2	1.51	1.33351	1.71602
CAPN15	0.7	0.598553	0.826021
CAPN3	1.19	1.00359	1.405
CAPN5	0.73	0.624457	0.849015
CARD10	0.7	0.598713	0.82626
CARD14	0.81	0.678064	0.965139
CARD19	0.83	0.699265	0.982983
CARD8	1.34	1.13584	1.57777
CARF	1.37	1.17396	1.58838
CARM1	0.83	0.702896	0.981597
CARS1	0.67	0.577316	0.773304
CARTPT	1.43	1.26146	1.62181
CASK	0.71	0.615247	0.8108
CASKIN1	0.76	0.638017	0.893494
CASP10	0.67	0.590115	0.763591
CASP3	0.68	0.590019	0.783841
CASP7	0.71	0.622365	0.81841
CASP8	0.7	0.600341	0.814499
CAV1	1.5	1.29834	1.73991
CAV2	1.53	1.30373	1.79136
CAVIN1	1.55	1.34188	1.78041
CBFA2T3	1.3	1.11198	1.52027
CBFB	0.74	0.638664	0.868275
CBL	1.33	1.13557	1.55831
CBLB	0.83	0.705075	0.985264
CBLC	0.7	0.602371	0.815405
CBX3	0.72	0.613371	0.837092
CBX4	0.84	0.703939	0.9977
CBX5	1.4	1.21746	1.60554
CBX6	1.54	1.33368	1.76693
CBX7	1.44	1.25118	1.65019
CBY1	1.44	1.24104	1.6814
CC2D1A	0.7	0.592837	0.82889
CCAR1	0.72	0.610157	0.843711
CCDC47	0.69	0.600798	0.798706
CCDC59	0.77	0.662631	0.902072
CCDC88C	0.66	0.564042	0.783983
CCKAR	1.28	1.09735	1.48673
CCKBR	1.18	1.00355	1.3835
CCL15	1.41	1.19208	1.65716
CCL2	1.34	1.14284	1.57915
CCL24	0.69	0.598255	0.802531
CCL26	1.21	1.02832	1.4224
CCL28	0.73	0.62522	0.857281
CCN2	1.54	1.30963	1.80273
CCN4	1.23	1.04795	1.45495
CCN5	1.41	1.22039	1.62067
CCNA2	0.71	0.615987	0.82164
CCNC	0.68	0.592025	0.789633
CCND1	0.7	0.601307	0.817381
CCNE1	0.74	0.626638	0.866614
CCNK	0.65	0.567896	0.747159
CCNT1	0.79	0.673613	0.929156
CCR10	1.39	1.18033	1.6462
CCR6	0.7	0.609564	0.814594
CD160	1.3	1.10722	1.53453
CD164	0.69	0.597099	0.792038
CD24	0.72	0.614406	0.832408
CD27	1.19	1.00833	1.39296
CD2AP	0.69	0.608716	0.791246
CD33	1.2	1.00864	1.42225
CD34	1.39	1.20453	1.59492
CD36	1.41	1.18866	1.6711
CD40	1.38	1.157	1.63816
CD44	1.2	1.00989	1.4373
CD5	1.3	1.10419	1.5413
CD69	1.18	1.00295	1.39523
CD72	1.29	1.0969	1.52528
CD79B	1.18	1.00907	1.38352
CDC37	0.72	0.607073	0.850974
CDC42EP1	0.69	0.599709	0.800387
CDC42EP3	1.6	1.36155	1.87792
CDC42EP5	0.72	0.616095	0.844293
CDC5L	0.76	0.642201	0.891272
CDCA7	0.67	0.577694	0.777189
CDH1	0.7	0.608788	0.796927
CDH13	1.32	1.1398	1.53394
CDH2	1.49	1.31544	1.69426
CDK11B	0.69	0.578026	0.822726
CDK12	0.7	0.599825	0.819073
CDK18	0.82	0.699095	0.970767
CDK2	0.73	0.619376	0.852619
CDK4	0.79	0.669942	0.935278
CDK5	0.68	0.582684	0.787859
CDK6	0.76	0.637691	0.897642
CDK7	0.75	0.651441	0.866781
CDKL2	1.5	1.31956	1.71369
CDKN1B	1.21	1.01424	1.43387
CDKN1C	1.5	1.2869	1.74666
CDKN2AIP	0.72	0.621921	0.825927
CDON	1.44	1.2739	1.63018
CDS1	0.71	0.618098	0.814513
CDX1	0.76	0.63646	0.89642
CDX2	0.79	0.669144	0.942871
CEACAM1	0.75	0.643817	0.878308
CEACAM6	0.78	0.664546	0.911731
CEBPA	0.78	0.65166	0.931267
CEBPD	1.42	1.21835	1.64902
CEBPG	0.68	0.586812	0.788465
CEBPZ	0.77	0.658989	0.901727
CELSR3	0.68	0.576899	0.790344
CENPF	0.71	0.613653	0.832579
CENPI	0.75	0.641791	0.874639
CENPK	0.69	0.601381	0.798881
CENPU	0.68	0.58833	0.779503
CEP290	1.29	1.09215	1.52347
CEP63	1.22	1.03849	1.44167
CERS2	0.81	0.681148	0.967569
CERS4	1.48	1.28558	1.71235
CERS5	1.51	1.30464	1.73812
CERS6	0.66	0.568355	0.755018
CFL1	0.7	0.605404	0.817456
CFLAR	1.24	1.05271	1.47181
CGGBP1	1.26	1.05734	1.49349
CHAF1A	0.68	0.58495	0.794933
CHAF1B	0.67	0.577777	0.780705
CHAMP1	0.7	0.594191	0.821128
CHD1	0.83	0.70865	0.976013
CHD3	1.5	1.29971	1.7267
CHD6	1.52	1.31145	1.75445
CHD7	0.7	0.588296	0.821366
CHD9	1.35	1.14334	1.5951
CHEK1	0.75	0.63892	0.872859
CHEK2	0.68	0.586525	0.794075
CHL1	1.34	1.13607	1.58704
CHMP1A	0.75	0.630899	0.885195
CHN1	1.37	1.18616	1.57882
CHP1	0.72	0.624006	0.834574
CHRDL1	1.5	1.3091	1.70808
CHRNA1	0.76	0.659237	0.885586
CHRNA3	1.43	1.27148	1.61598
CHST11	1.28	1.09016	1.5121
CHUK	0.73	0.627422	0.841077
CIAO1	0.73	0.62064	0.869306
CIDEB	0.81	0.674112	0.963669
CISH	0.71	0.613687	0.822495
CIT	0.75	0.637201	0.893303
CITED2	1.4	1.20161	1.62094
CIZ1	1.2	1.02299	1.4102
CKS1B	0.73	0.625625	0.847872
CKS2	0.74	0.630158	0.857503
CLCN6	1.38	1.20192	1.58909
CLDN3	0.78	0.664374	0.92297
CLDN4	0.73	0.624793	0.844497
CLEC1A	1.44	1.22979	1.67956
CLIC1	0.7	0.607592	0.806071
CLIC2	1.35	1.13691	1.60009
CLN3	0.7	0.597484	0.826784
CLP1	0.72	0.620748	0.842761
CLU	1.44	1.23639	1.67931
CNKSR1	0.71	0.622069	0.817564
CNKSR2	1.48	1.29976	1.68368
CNOT1	0.66	0.563477	0.776697
CNOT2	0.71	0.607122	0.833139
CNOT3	0.75	0.631333	0.884702
CNOT6	0.66	0.561507	0.77738
CNOT7	0.73	0.621487	0.85568
CNOT9	0.69	0.594697	0.804077
CNR1	1.54	1.3322	1.78167
CNTLN	1.47	1.2741	1.68907
CNTN1	1.44	1.25918	1.65295
CNTNAP1	1.47	1.27469	1.7025
CNTNAP2	0.82	0.693659	0.975941
CNTNAP3	1.31	1.11837	1.53289
CNTNAP4	1.53	1.29796	1.80142
COLEC12	1.42	1.20081	1.67031
COPS5	0.72	0.617154	0.841585
CORO1C	1.38	1.176	1.62487
CORO2A	0.73	0.622028	0.847783
CPE	1.46	1.26962	1.66816
CREB1	1.35	1.13351	1.59695
CREB3	1.22	1.03238	1.44218
CREB3L1	0.7	0.600293	0.82184
CREB3L2	1.49	1.27091	1.74853
CREB3L4	0.8	0.673283	0.94174
CREB5	1.45	1.2528	1.68748
CREBBP	1.35	1.16125	1.55887
CREBL2	1.25	1.05032	1.4843
CREBRF	1.41	1.19881	1.64732
CREM	1.53	1.30996	1.78728
CRK	0.8	0.692116	0.933407
CRTC3	1.47	1.26538	1.70725
CRY2	1.44	1.25995	1.65475
CRYAB	1.54	1.35346	1.74095
CSDE1	1.46	1.28552	1.65322
CSF1	1.35	1.1592	1.57095
CSF2RB	1.2	1.0214	1.41586
CSK	0.77	0.645731	0.910295
CSNK1G1	0.72	0.618283	0.838385
CSNK1G2	0.76	0.64412	0.901169
CSNK2A1	0.75	0.633167	0.888601
CSNK2B	0.84	0.707225	0.992612
CSPG4	1.52	1.31317	1.75278
CSRNP1	1.38	1.16839	1.62327
CSRNP2	1.47	1.25463	1.72509
CSRNP3	1.42	1.20866	1.67898
CTBP1	0.78	0.653105	0.923868
CTBP2	0.67	0.566988	0.79101
CTNNAL1	1.26	1.05857	1.49215
CTNNBIP1	0.76	0.640497	0.90937
CTNND1	0.77	0.668718	0.886759
CTNND2	1.49	1.25176	1.77331
CUL3	0.75	0.645907	0.861282
CX3CL1	1.4	1.20195	1.6339
CX3CR1	1.38	1.16487	1.62354
CXCL16	0.72	0.623451	0.825
CXCL3	0.67	0.581666	0.782512
CXCR4	1.24	1.05564	1.4638
CXXC4	1.44	1.22277	1.68779
CYCS	0.71	0.609963	0.816493
CYP27B1	0.76	0.652121	0.890917
CYSLTR1	1.38	1.17123	1.62867
CYTL1	1.32	1.13127	1.54335
DACT1	1.46	1.24815	1.70674
DAP	0.76	0.650445	0.893087
DAP3	0.78	0.658354	0.923421
DAPK1	1.21	1.01804	1.44132
DAPK3	1.46	1.27483	1.68218
DAXX	0.77	0.654495	0.90887
DBP	1.41	1.20732	1.64954
DCAF6	1.29	1.09313	1.51407
DCBLD2	1.48	1.28032	1.71057
DCLK1	1.53	1.30558	1.78452
DCLK2	1.53	1.33683	1.74555
DDAH1	0.67	0.575544	0.780132
DDAH2	1.46	1.25527	1.69201
DDIT3	0.8	0.677148	0.942454
DDIT4L	1.5	1.29331	1.73789
DDR1	0.74	0.631078	0.858389
DDR2	1.54	1.32244	1.78526
DDX1	0.77	0.663332	0.890075
DDX10	0.8	0.677967	0.944055
DDX20	0.8	0.678382	0.941627
DDX5	1.27	1.07462	1.50868
DDX54	0.73	0.616301	0.862812
DDX6	1.23	1.0519	1.44958
DEDD	1.25	1.06126	1.47567
DEDD2	0.75	0.635571	0.885736
DEF8	1.49	1.28911	1.72816
DEK	0.77	0.657941	0.898001
DENND4A	1.21	1.02109	1.44502
DEPDC1	0.73	0.622768	0.852509
DEPDC1B	0.71	0.613446	0.812303
DERL1	0.7	0.622481	0.796429
DERL2	0.8	0.683869	0.943382
DFFB	0.63	0.530414	0.744192
DGKE	1.31	1.1222	1.53356
DGKG	1.45	1.25617	1.67477
DGKH	1.2	1.02151	1.41578
DGKI	1.41	1.21738	1.63945
DGKQ	0.7	0.594071	0.831122
DHCR24	0.72	0.624133	0.832928
DIABLO	0.73	0.622629	0.861483
DIRAS3	1.38	1.17704	1.60679
DISP1	1.32	1.12667	1.55776
DIXDC1	1.47	1.28147	1.67646
DKK1	1.39	1.1834	1.6337
DLC1	1.43	1.21768	1.68064
DLG4	1.48	1.26554	1.71972
DLL1	1.21	1.03984	1.40466
DLX4	0.8	0.679526	0.950467
DLX5	1.59	1.37119	1.8371
DLX6	1.21	1.02588	1.43036
DMAP1	1.29	1.10018	1.50158
DMD	1.53	1.33889	1.75518
DMTF1	1.27	1.08254	1.4984
DNAJA1	0.73	0.623394	0.855425
DNAJA3	0.7	0.592557	0.830211
DNAJB6	1.52	1.3441	1.72775
DNAJC27	1.43	1.23268	1.65853
DNER	1.51	1.29244	1.76157
DNM2	0.68	0.582302	0.795439
DNMBP	0.72	0.619105	0.847005
DNMT1	0.74	0.631377	0.864195
DOK4	0.75	0.650267	0.862977
DOK5	1.42	1.20807	1.66047
DOT1L	0.68	0.579939	0.788702
DPYSL2	1.39	1.18902	1.61989
DPYSL3	1.52	1.32082	1.75608
DPYSL5	1.46	1.26192	1.68709
DST	1.42	1.22772	1.64786
DTNA	1.54	1.34473	1.75503
DTX1	1.41	1.19572	1.66671
DTX2	0.68	0.577779	0.799762
DTX3	1.59	1.39083	1.81674
DTX4	0.74	0.643026	0.852179
DUOX2	0.84	0.708676	0.984386
DUSP1	1.26	1.06136	1.48622
DUSP10	1.23	1.03376	1.46835
DUSP16	0.75	0.629358	0.883149
DUSP22	1.5	1.28854	1.74869
DUSP4	0.76	0.64134	0.890546
DVL1	0.8	0.67638	0.954148
DYRK2	0.7	0.596692	0.811772
DZIP3	1.4	1.1929	1.65049
E2F2	0.67	0.579202	0.78201
E2F3	0.77	0.657168	0.904373
E2F5	0.68	0.581149	0.78758
E2F7	0.7	0.603388	0.81188
E2F8	0.69	0.59486	0.793126
EAF1	0.69	0.60294	0.79733
EAF2	0.82	0.695665	0.974831
EBF1	1.45	1.2465	1.69449
EBF2	1.48	1.27356	1.71162
EBF3	1.44	1.23477	1.67839
EBP	0.7	0.600889	0.817563
ECT2	0.75	0.639707	0.879116
EDN1	1.25	1.05764	1.48706
EDNRA	1.46	1.25092	1.71024
EDNRB	1.39	1.17534	1.64518
EED	0.73	0.626429	0.856108
EEF1E1	0.83	0.706807	0.971259
EFNA1	0.71	0.608992	0.831203
EFNB3	1.34	1.14805	1.56253
EFS	1.46	1.24817	1.69973
EGR1	1.48	1.28184	1.69765
EGR2	1.46	1.23623	1.72641
EGR3	1.55	1.32891	1.8018
EGR4	0.72	0.613748	0.838688
EHF	0.72	0.641609	0.809168
EID1	1.52	1.32176	1.74088
EID2B	1.44	1.2525	1.65081
EID3	1.53	1.32783	1.7732
EIF4EBP1	0.73	0.615733	0.860616
EIF4EBP2	1.3	1.10519	1.52375
ELF2	1.24	1.06112	1.45423
ELF3	0.7	0.611008	0.800992
ELF4	0.76	0.651575	0.87918
ELK3	1.37	1.16818	1.60135
ELL2	1.49	1.27596	1.7336
ELL3	0.64	0.545763	0.755832
ELMO1	1.38	1.16509	1.62394
ELMSAN1	1.39	1.18815	1.63018
ELN	1.57	1.34296	1.82656
ELOC	0.76	0.64645	0.890574
ELOVL4	1.48	1.2821	1.69726
ELP3	0.66	0.560689	0.769596
EML4	0.69	0.590774	0.797597
EMSY	1.28	1.08543	1.51997
ENDOG	0.7	0.589356	0.824293
ENG	1.34	1.15499	1.55692
ENO1	0.74	0.63092	0.866202
ENPP1	1.41	1.1851	1.67014
ENPP2	1.36	1.15113	1.59926
EPAS1	1.41	1.1831	1.67299
EPC1	1.39	1.1979	1.62372
EPC2	1.34	1.13032	1.58242
EPHA1	0.71	0.619551	0.821361
EPHA10	0.64	0.555053	0.747884
EPHA2	0.81	0.684698	0.950093
EPHA3	1.53	1.29979	1.8065
EPHA4	1.55	1.33106	1.79866
EPHA7	1.44	1.26165	1.63637
EPHB2	0.74	0.620889	0.870994
EPHB3	0.68	0.579787	0.801742
EPHB4	0.8	0.674698	0.940505
EPHB6	1.58	1.33396	1.87017
EPS8	0.72	0.635615	0.817611
ERBB2	0.74	0.632879	0.857258
ERBB3	0.71	0.619459	0.820138
ERC1	1.42	1.22627	1.65019
ERCC2	0.84	0.706363	0.995965
ERG	1.4	1.20675	1.63566
ERN2	0.74	0.635918	0.85056
ERO1A	0.7	0.598126	0.809964
ERRFI1	1.29	1.10155	1.51987
ESF1	0.83	0.701166	0.984975
ESR1	1.36	1.15274	1.60257
ESRRA	0.71	0.599333	0.837698
ESRRG	1.18	1.0054	1.39041
ETS2	0.78	0.651121	0.926668
ETV1	1.47	1.25314	1.72628
ETV2	0.74	0.630418	0.869411
EVL	1.35	1.15299	1.58865
EWSR1	0.71	0.597294	0.837584
EYA1	1.5	1.28751	1.75347
EYA2	1.23	1.05333	1.4428
EYA3	0.68	0.575655	0.793817
EYA4	1.49	1.27589	1.73481
EZH1	1.44	1.25988	1.64293
EZH2	0.73	0.615735	0.861236
F2R	1.32	1.11574	1.56932
F2RL1	0.72	0.622167	0.822254
F2RL2	1.32	1.10803	1.56381
FABP4	1.51	1.3168	1.73164
FADD	0.75	0.632274	0.880457
FADS1	1.54	1.32419	1.80241
FAM126A	1.29	1.09927	1.52324
FAM13B	1.41	1.20659	1.65353
FANCA	0.68	0.58578	0.794525
FANCC	0.72	0.61657	0.851623
FANCD2	0.68	0.585091	0.789215
FANCE	0.73	0.619751	0.868238
FANCF	0.73	0.61867	0.864283
FANCG	0.7	0.598484	0.816108
FANCL	0.83	0.704792	0.980632
FARP2	0.73	0.621728	0.847782
FASTK	0.81	0.687326	0.962204
FAT1	0.69	0.591843	0.812686
FBXO6	0.72	0.618616	0.844674
FBXO8	1.27	1.07922	1.4973
FBXW11	1.39	1.17175	1.64502
FBXW7	1.28	1.08884	1.49898
FCER1A	1.41	1.20438	1.6605
FCGR2B	1.2	1.01018	1.42884
FCGR2C	1.32	1.11165	1.56501
FEN1	0.73	0.617251	0.856516
FER	1.41	1.19728	1.65254
FEZ2	1.35	1.13589	1.60546
FGD1	1.51	1.31912	1.72749
FGD3	1.31	1.1218	1.53061
FGD5	1.3	1.10448	1.52517
FGD6	1.29	1.09545	1.53018
FGF1	1.49	1.27176	1.73812
FGF10	1.51	1.30012	1.74453
FGF12	1.53	1.3265	1.76754
FGF13	1.6	1.38117	1.85263
FGF14	1.48	1.28326	1.71599
FGF18	1.45	1.2574	1.66536
FGF2	1.45	1.25247	1.67441
FGF4	0.71	0.594672	0.84165
FGF7	1.46	1.24507	1.70667
FGF9	1.49	1.2555	1.76059
FGFBP1	0.7	0.586845	0.833436
FGFR1	1.55	1.35324	1.77734
FGFR1OP	0.71	0.606026	0.841659
FGFR3	0.82	0.692102	0.979829
FGFR4	0.79	0.669721	0.92091
FH	0.72	0.615083	0.834607
FHL5	1.52	1.29497	1.77541
FLI1	1.21	1.02616	1.42247
FLNA	1.51	1.31797	1.7236
FLNB	0.71	0.612873	0.819928
FLRT2	1.46	1.25021	1.70148
FLRT3	0.77	0.653994	0.916257
FLT1	1.22	1.04666	1.42992
FLT3LG	1.24	1.04519	1.47395
FMN2	1.45	1.27659	1.64347
FNBP1	1.51	1.30733	1.74832
FOS	1.19	1.01484	1.39454
FOSB	1.24	1.05349	1.45888
FOSL1	0.76	0.64455	0.894138
FOSL2	0.83	0.704151	0.985308
FOXA1	0.72	0.628224	0.821744
FOXA2	0.71	0.610318	0.835927
FOXA3	0.76	0.655775	0.891408
FOXC2	1.51	1.29998	1.74793
FOXD1	0.76	0.638805	0.89893
FOXD2	0.69	0.592523	0.796742
FOXF1	1.49	1.29577	1.72036
FOXF2	1.48	1.25621	1.7362
FOXH1	0.72	0.60425	0.846172
FOXJ1	0.76	0.643351	0.907877
FOXJ2	1.42	1.22657	1.63514
FOXK2	0.79	0.666798	0.939471
FOXM1	0.71	0.612821	0.825534
FOXN2	0.72	0.618754	0.844364
FOXN3	1.42	1.2271	1.65003
FOXO1	1.4	1.18393	1.65986
FOXP1	1.38	1.1965	1.59731
FOXP2	1.51	1.33038	1.7075
FOXQ1	0.79	0.67673	0.929077
FOXS1	1.38	1.17805	1.62616
FRAT2	0.67	0.574959	0.792185
FRS2	1.24	1.04722	1.47736
FRY	1.55	1.33182	1.79303
FST	1.5	1.27709	1.76077
FSTL1	1.45	1.23518	1.69799
FSTL3	1.41	1.20558	1.64517
FUBP1	0.68	0.590019	0.794702
FUT8	0.72	0.627585	0.815461
FYN	1.52	1.30539	1.76953
FZD1	1.44	1.23842	1.67289
FZD10	1.44	1.21625	1.70405
FZD2	1.35	1.16131	1.55978
FZD4	1.59	1.36152	1.86226
FZD5	0.74	0.631949	0.864815
FZD8	1.5	1.28533	1.73972
G3BP1	0.72	0.614118	0.841016
GAB1	1.36	1.15421	1.60996
GABPB1	0.76	0.647321	0.892801
GABRE	1.51	1.28031	1.78631
GABRG2	1.44	1.23612	1.67794
GADD45B	1.53	1.32771	1.76334
GADD45G	1.42	1.22805	1.65051
GAP43	1.46	1.26524	1.6874
GAPVD1	0.85	0.720023	0.998825
GARNL3	1.26	1.08516	1.46772
GAS1	1.47	1.26686	1.70667
GAS7	1.44	1.22863	1.69524
GATA2	1.37	1.16816	1.60868
GATA3	1.23	1.05765	1.4341
GATA4	0.74	0.638735	0.859603
GATA5	1.22	1.03092	1.44243
GATA6	0.77	0.65264	0.901844
GATAD2A	0.69	0.59092	0.800731
GATAD2B	1.37	1.18419	1.58799
GDI2	0.69	0.594672	0.806095
GDNF	1.53	1.29555	1.80663
GEM	1.5	1.30232	1.71789
GFI1B	1.23	1.03461	1.4573
GFRA1	1.37	1.16373	1.60258
GFRA3	1.48	1.2847	1.71499
GGCT	0.71	0.608116	0.838682
GHR	1.48	1.27035	1.72099
GID4	1.43	1.25672	1.62655
GIPC1	0.8	0.679015	0.946521
GIT2	1.33	1.12249	1.56924
GJA1	1.46	1.27715	1.6793
GKAP1	1.42	1.23829	1.62614
GLI1	1.4	1.18437	1.6569
GLI2	1.49	1.28547	1.73721
GLI3	1.49	1.28406	1.72842
GLIS1	1.52	1.29475	1.79279
GLIS3	1.43	1.20896	1.68938
GLRB	1.56	1.3542	1.79352
GLRX2	0.74	0.639746	0.860186
GMCL1	0.66	0.565631	0.771267
GMEB1	0.68	0.584385	0.801306
GMIP	0.72	0.612828	0.842611
GMNN	0.71	0.610773	0.822746
GMPS	0.72	0.613134	0.845372
GNA11	0.74	0.629988	0.877274
GNA14	1.31	1.10137	1.56062
GNAI1	1.57	1.35878	1.82502
GNAI2	1.48	1.27439	1.72803
GNAL	1.56	1.36683	1.78689
GNAO1	1.55	1.36116	1.77575
GNAQ	1.2	1.01614	1.41877
GNAZ	1.41	1.22824	1.60879
GNB1L	0.79	0.667373	0.940134
GNB2	0.76	0.635155	0.900425
GNB4	1.45	1.22772	1.70955
GNB5	1.56	1.35984	1.79537
GNG11	1.44	1.22806	1.68363
GNG12	1.22	1.03493	1.44879
GNG2	1.3	1.10267	1.5368
GNG7	1.4	1.2043	1.62661
GON4L	1.18	1.01014	1.36974
GP1BA	1.19	1.00459	1.40336
GP1BB	1.44	1.2638	1.64461
GPBAR1	1.46	1.23129	1.73186
GPC3	1.54	1.29923	1.82058
GPHN	0.63	0.542908	0.735418
GPR146	1.51	1.2999	1.74613
GPR153	1.49	1.2799	1.73275
GPR155	1.38	1.19631	1.59659
GPR160	0.77	0.652099	0.898017
GPR176	1.28	1.10147	1.49217
GPR19	0.8	0.675241	0.946617
GPR27	1.42	1.21729	1.65769
GPR35	0.71	0.613004	0.823248
GPR39	0.71	0.61754	0.819677
GPR4	1.27	1.08552	1.47491
GPR68	1.35	1.15393	1.57461
GPR85	1.25	1.05366	1.47457
GPRC5A	0.72	0.631237	0.824899
GPRC5B	1.19	1.00814	1.40958
GPRC5D	0.78	0.663835	0.917589
GPS1	0.83	0.697371	0.986285
GPSM2	0.76	0.643524	0.894369
GPSM3	1.2	1.0194	1.40655
GRB7	0.77	0.657716	0.901199
GREM1	1.41	1.20062	1.65347
GREM2	1.35	1.14549	1.58249
GRHL1	0.77	0.647712	0.904085
GRHL2	0.68	0.590678	0.78276
GRIN2A	1.44	1.27411	1.62972
GRIN2C	1.27	1.09269	1.48067
GRIN2D	0.72	0.614158	0.83865
GRIP1	1.53	1.32073	1.77391
GRK3	1.27	1.07837	1.49553
GRK4	1.42	1.24322	1.61106
GRK5	1.2	1.01881	1.40509
GRK6	0.84	0.705827	0.997972
GRTP1	0.7	0.594479	0.813779
GSK3B	0.83	0.702283	0.981558
GSN	1.4	1.18644	1.6423
GSPT1	0.76	0.649974	0.898567
GTF2A2	0.73	0.62134	0.85942
GTF2E2	0.69	0.598963	0.79974
GTF2F1	0.82	0.693575	0.979145
GTF2H3	0.74	0.630259	0.86857
GTF2H4	0.82	0.691674	0.983048
GTF2IRD2	1.44	1.24953	1.66584
GTSE1	0.73	0.620772	0.847415
GUCA1B	1.38	1.18337	1.60419
GUCY1A1	1.45	1.23059	1.6994
GUCY1A2	1.44	1.23613	1.67298
GUCY1B1	1.54	1.31808	1.80143
GUCY2C	0.79	0.661618	0.937875
GZMA	0.82	0.685994	0.973166
H1.2	0.84	0.713199	0.997676
H2AC11	0.73	0.610861	0.86476
H2AC16	0.84	0.707175	0.997349
H2AC17	0.74	0.62968	0.878493
H2AX	0.74	0.632279	0.873421
H2BC12	0.78	0.651055	0.923889
H2BC4	0.78	0.658728	0.929521
H3C2	0.75	0.631779	0.902015
H4C1	0.72	0.613638	0.856492
H4C13	0.76	0.63821	0.905164
H4C14	1.24	1.04467	1.46542
H4C2	0.81	0.674837	0.965288
H4C3	0.81	0.677988	0.958695
H4C4	0.73	0.61769	0.868177
H4C5	0.81	0.673122	0.968117
H4C9	0.83	0.696041	0.999151
HABP4	1.48	1.29875	1.69749
HACD3	0.65	0.570047	0.743607
HAND1	1.46	1.2376	1.7106
HASPIN	0.71	0.609421	0.835845
HAT1	0.74	0.637493	0.865366
HBP1	1.28	1.08072	1.52301
HCFC2	1.43	1.21925	1.67631
HDAC1	0.66	0.570506	0.756021
HDAC2	0.79	0.667923	0.933034
HDAC4	1.46	1.28074	1.67202
HDAC5	1.5	1.29494	1.74708
HDAC7	1.31	1.1435	1.50725
HDAC9	1.48	1.26082	1.74227
HDGF	0.74	0.630589	0.871859
HELLS	0.71	0.608573	0.821196
HELZ	1.26	1.07379	1.48506
HELZ2	0.8	0.673144	0.942306
HES1	0.77	0.648687	0.905448
HES2	0.8	0.683316	0.940346
HES6	0.69	0.592062	0.813113
HEXIM1	1.47	1.27951	1.69917
HEY1	1.51	1.30315	1.75448
HEY2	1.48	1.27779	1.71705
HEYL	1.55	1.33103	1.80767
HGF	1.36	1.14934	1.61255
HGS	0.83	0.696778	0.98706
HHEX	1.42	1.20806	1.6721
HHIP	1.25	1.05661	1.48039
HIC1	1.39	1.2011	1.61766
HIF3A	1.5	1.32874	1.70431
HINFP	0.82	0.690284	0.982346
HIPK3	1.27	1.07116	1.50697
HIRA	0.71	0.597786	0.840277
HIVEP1	1.29	1.08212	1.53608
HIVEP2	1.43	1.21622	1.67811
HIVEP3	1.2	1.02938	1.40176
HLF	1.47	1.29539	1.66074
HLX	1.32	1.14	1.51903
HMGA1	0.68	0.586281	0.800022
HMGB1	0.71	0.60793	0.835334
HMGB2	0.74	0.629312	0.870686
HMGCR	0.69	0.600697	0.798053
HMGN1	0.65	0.558476	0.762758
HNF1A	0.71	0.609619	0.830897
HNF1B	0.74	0.640781	0.843856
HNF4A	0.7	0.598185	0.82644
HNF4G	0.67	0.579481	0.763842
HNRNPAB	0.66	0.559177	0.780835
HNRNPD	0.74	0.628563	0.881335
HNRNPUL1	0.82	0.69486	0.970638
HOPX	1.56	1.32952	1.82774
HOXA10	0.73	0.622041	0.854757
HOXA11	0.67	0.574284	0.780531
HOXA13	0.64	0.547867	0.740638
HOXA2	1.52	1.3345	1.73841
HOXA3	1.49	1.30325	1.71486
HOXA4	1.51	1.3358	1.69911
HOXA5	1.47	1.28631	1.67092
HOXA9	0.72	0.61378	0.845902
HOXB13	0.71	0.601648	0.839506
HOXB2	1.45	1.22307	1.7103
HOXB4	1.47	1.25876	1.70924
HOXB7	0.72	0.615652	0.845949
HOXB9	0.79	0.672879	0.922341
HOXC11	0.81	0.690395	0.948115
HOXC4	1.27	1.10625	1.45609
HOXC5	1.45	1.2424	1.70305
HOXD1	1.46	1.24225	1.7261
HOXD4	1.31	1.12289	1.53296
HOXD8	1.42	1.23014	1.64447
HPGDS	1.35	1.14733	1.59736
HR	0.72	0.615543	0.853833
HRAS	0.84	0.705466	0.989071
HSBP1	0.74	0.643031	0.862981
HSF2	1.3	1.11735	1.50974
HSP90AA1	0.74	0.630392	0.866553
HSP90AB1	0.74	0.627539	0.870126
HSPA5	0.7	0.60967	0.793848
HSPB1	1.49	1.27965	1.72429
HSPD1	0.68	0.591215	0.786777
HTATIP2	0.73	0.633979	0.836018
HTATSF1	0.72	0.610035	0.844531
HTR2A	1.43	1.21618	1.69231
HTR2B	1.36	1.15151	1.59874
HTR3A	1.34	1.14158	1.56447
HTT	0.72	0.614387	0.844661
HUNK	1.43	1.20343	1.70951
HUS1	0.74	0.631392	0.877375
ID1	0.77	0.656029	0.915352
ID2	1.43	1.2462	1.64906
ID3	1.53	1.29207	1.80373
ID4	1.56	1.35607	1.78578
IDE	0.69	0.596252	0.805081
IDH1	0.7	0.616963	0.799164
IDH2	0.7	0.587314	0.829403
IFI27	0.76	0.651363	0.895383
IFNG	0.82	0.688696	0.982247
IFNGR2	0.72	0.629443	0.8266
IFT88	0.82	0.691037	0.974165
IGF1	1.51	1.29747	1.76767
IGF1R	1.34	1.13831	1.57431
IGF2	1.52	1.3169	1.76417
IGFBP6	1.54	1.32905	1.77526
IGHMBP2	1.25	1.06554	1.45892
IGSF1	1.54	1.34861	1.76277
IHH	0.83	0.700883	0.975632
IKBKE	0.72	0.623873	0.823454
IKZF4	1.52	1.31216	1.75922
IL11RA	1.42	1.23752	1.62922
IL16	1.19	1.01057	1.39484
IL17C	0.74	0.626721	0.872381
IL17RD	1.55	1.35598	1.77528
IL1R1	1.51	1.2673	1.7874
IL22RA1	0.74	0.625635	0.877499
IL2RG	0.79	0.674405	0.914338
IL3RA	1.28	1.09275	1.48823
IL5RA	1.4	1.18446	1.6654
IL6	1.19	1.02103	1.39825
IL6R	1.35	1.14243	1.59264
IL6ST	1.44	1.22577	1.69829
ILF2	0.71	0.611117	0.826274
ILF3	0.81	0.681283	0.959343
ILK	1.5	1.287	1.75549
IMPA1	0.64	0.555167	0.74872
ING4	1.38	1.17194	1.61989
INPP4A	1.51	1.30209	1.74932
INPP4B	1.35	1.13931	1.60513
INPP5B	1.45	1.25205	1.67885
INSIG1	0.7	0.598148	0.822716
INSR	1.25	1.05771	1.48022
IQGAP3	0.7	0.598774	0.809001
IQSEC1	1.47	1.26778	1.71425
IRAK1	0.72	0.620102	0.844324
IRAK2	0.72	0.621891	0.831609
IRAK3	1.32	1.11726	1.57068
IRF3	0.73	0.617388	0.85316
IRF5	1.19	1.01614	1.39303
IRF6	0.69	0.60168	0.798556
IRS1	1.56	1.33507	1.81382
IRS2	1.41	1.19641	1.65075
IRX2	0.72	0.606634	0.847282
IRX5	0.83	0.699219	0.98392
ISL1	1.5	1.29756	1.72416
ISL2	1.56	1.36707	1.77332
ITGA1	1.54	1.32432	1.78681
ITGA10	1.45	1.24403	1.70015
ITGA2	0.75	0.645223	0.878338
ITGA5	1.45	1.24098	1.68625
ITGA6	0.68	0.590264	0.781798
ITGA7	1.52	1.33395	1.73319
ITGA8	1.53	1.30921	1.79079
ITGA9	1.5	1.29342	1.73367
ITGAV	1.26	1.05497	1.49391
ITGB1	1.43	1.21923	1.68495
ITGB1BP2	1.47	1.2998	1.67191
ITGB3	1.48	1.26834	1.7312
ITGB3BP	0.77	0.658252	0.898393
ITGB4	0.73	0.622712	0.85234
ITGB6	0.81	0.704608	0.920968
ITGBL1	1.43	1.22271	1.66669
ITPK1	0.65	0.554939	0.773081
ITPKA	0.77	0.651085	0.904056
ITPKB	1.38	1.18919	1.59305
ITPR1	1.4	1.19209	1.63835
ITPR2	1.31	1.10147	1.54699
ITPR3	0.67	0.583047	0.776106
ITSN1	1.52	1.31129	1.75667
ITSN2	1.4	1.18173	1.65521
JADE1	1.43	1.23763	1.64118
JAK1	1.23	1.04632	1.45181
JAK2	0.74	0.629408	0.874185
JAZF1	1.52	1.30122	1.7854
JDP2	1.33	1.13154	1.57119
JMJD1C	1.28	1.07919	1.51628
JMY	1.49	1.29792	1.70186
JUP	0.7	0.60627	0.810087
KAT2A	0.75	0.631696	0.883456
KAT2B	1.28	1.08663	1.50727
KAT6B	1.37	1.1775	1.59021
KCNH2	1.53	1.34046	1.74793
KCTD1	0.81	0.682448	0.951799
KDM1A	0.74	0.625293	0.868649
KDM4A	0.75	0.63765	0.882081
KDM4C	0.68	0.583516	0.791909
KDM5A	1.29	1.09014	1.52283
KDM5C	0.84	0.705528	0.989599
KDR	1.3	1.12032	1.50539
KEAP1	0.78	0.657742	0.925551
KEL	1.37	1.16668	1.59712
KHDRBS1	0.75	0.631462	0.886334
KHDRBS3	1.43	1.24234	1.65252
KHSRP	0.78	0.653663	0.921782
KIDINS220	1.45	1.25355	1.67316
KIF26A	1.23	1.04782	1.44903
KIF5B	0.82	0.697157	0.973121
KIFAP3	1.57	1.34845	1.83355
KISS1R	0.78	0.656443	0.928336
KIT	1.4	1.20155	1.63373
KL	1.53	1.2993	1.79139
KLF10	1.48	1.28704	1.69362
KLF11	1.45	1.25838	1.68054
KLF12	1.45	1.23248	1.69682
KLF15	1.46	1.27367	1.68279
KLF2	1.21	1.02262	1.42567
KLF3	0.71	0.618656	0.817994
KLF5	0.67	0.580501	0.769213
KLF7	1.48	1.26333	1.72845
KLF8	1.53	1.32032	1.77508
KLF9	1.47	1.25795	1.72141
KLHL12	0.75	0.64047	0.879672
KLRC2	0.82	0.684503	0.972
KLRF1	1.22	1.03157	1.4458
KLRG1	1.18	1.00214	1.39784
KMT2E	1.26	1.0717	1.48121
KMT5A	0.73	0.61602	0.867419
KMT5B	0.81	0.691299	0.948043
KRAS	0.7	0.604793	0.813724
KREMEN2	0.75	0.638317	0.879065
KSR1	1.39	1.19918	1.60906
L3MBTL3	1.54	1.31686	1.7956
L3MBTL4	1.37	1.16541	1.61992
LANCL2	0.67	0.580032	0.770837
LASP1	0.71	0.612642	0.829944
LATS2	1.45	1.24185	1.70301
LBH	1.52	1.30335	1.77431
LCORL	0.65	0.570315	0.750499
LDB2	1.5	1.28291	1.75586
LDLRAP1	0.83	0.699372	0.988366
LEF1	1.27	1.08064	1.49415
LEMD3	0.76	0.64606	0.904826
LEO1	0.72	0.622661	0.833181
LEPR	1.43	1.21782	1.66762
LGALS1	1.48	1.27313	1.71905
LGALS3BP	0.72	0.612344	0.840566
LGR4	0.69	0.597608	0.788161
LHX1	0.76	0.633609	0.905685
LHX6	1.49	1.26724	1.74097
LIF	0.75	0.645192	0.87212
LIFR	1.36	1.16801	1.58854
LIN54	0.7	0.598148	0.820062
LITAF	1.28	1.08695	1.51004
LMCD1	1.49	1.28483	1.73119
LMO1	1.45	1.27856	1.637
LMO2	1.41	1.20463	1.65584
LMO3	1.54	1.34093	1.77048
LPAR1	1.46	1.23153	1.72264
LPAR2	0.71	0.60306	0.827406
LPAR5	0.69	0.592732	0.803245
LPAR6	1.31	1.10242	1.55014
LPIN2	0.69	0.601626	0.792855
LPP	1.43	1.24435	1.64431
LRP1	1.36	1.1627	1.60066
LRP12	1.58	1.34462	1.84864
LRPPRC	0.7	0.596507	0.81561
LRRK2	1.42	1.20135	1.66864
LRRN3	1.46	1.24111	1.70613
LSP1	1.31	1.11084	1.53484
LTBR	0.73	0.623444	0.863771
LY96	1.31	1.1051	1.5551
LYL1	1.37	1.18533	1.59271
LZTS1	1.45	1.24052	1.69826
MACC1	0.68	0.591027	0.781275
MAF	1.39	1.1718	1.64402
MAFB	1.21	1.02768	1.4304
MAFG	1.23	1.05199	1.44875
MAGED1	1.47	1.22725	1.75814
MAGI2	1.51	1.32835	1.72722
MAK	1.41	1.21527	1.64454
MALT1	1.2	1.0105	1.42615
MAML2	1.43	1.21145	1.68224
MAMLD1	1.56	1.34234	1.81779
MAP2K1	0.83	0.70096	0.982315
MAP2K3	0.81	0.684314	0.948958
MAP2K5	1.25	1.05613	1.47394
MAP2K6	0.79	0.66067	0.946919
MAP3K11	0.77	0.648577	0.913485
MAP3K12	1.55	1.33348	1.81085
MAP3K13	0.71	0.603047	0.827973
MAP3K14	1.32	1.13748	1.53973
MAP3K21	0.67	0.583583	0.774534
MAP3K3	1.5	1.29885	1.73199
MAP3K4	1.26	1.07462	1.47223
MAP3K7	0.84	0.714858	0.989717
MAP3K8	1.21	1.02728	1.42868
MAP3K9	0.74	0.628801	0.87691
MAP4K5	1.27	1.07116	1.51123
MAPK10	1.49	1.28904	1.72196
MAPK11	1.39	1.20887	1.58685
MAPK13	0.69	0.597271	0.804137
MAPK3	0.84	0.707172	0.988994
MAPK6	0.7	0.607679	0.800854
MAPKAPK3	0.69	0.583401	0.807621
MAPKAPK5	0.69	0.596658	0.799706
MAPRE2	1.35	1.14196	1.5918
MARK2	0.72	0.617054	0.844768
MAX	0.8	0.682883	0.943325
MAZ	0.8	0.677205	0.95275
MCC	1.47	1.26009	1.72484
MCM2	0.7	0.60377	0.819839
MCM3	0.72	0.612411	0.841283
MCM4	0.71	0.609031	0.824283
MCM5	0.72	0.616796	0.850764
MCM6	0.73	0.624361	0.845603
MCM7	0.71	0.608557	0.839505
MCM8	0.82	0.690138	0.972784
MCTP1	1.24	1.04263	1.46842
MCTP2	0.66	0.562519	0.764225
MCTS1	0.79	0.67879	0.916753
MDFIC	1.4	1.18293	1.66022
MDM4	1.26	1.06428	1.48072
MEAF6	1.3	1.11271	1.51795
MECP2	1.45	1.26484	1.67357
MED1	0.82	0.687716	0.972108
MED10	0.72	0.61221	0.852996
MED11	0.83	0.698756	0.974738
MED13	0.71	0.613959	0.826592
MED13L	1.44	1.23866	1.67137
MED14	0.64	0.551222	0.75259
MED18	0.71	0.601676	0.841308
MED19	0.77	0.653822	0.910914
MED20	0.81	0.676982	0.965373
MED23	0.73	0.619386	0.854798
MED24	0.76	0.639457	0.90017
MED6	0.83	0.704958	0.97989
MED8	0.71	0.607394	0.820541
MEF2A	1.47	1.25541	1.72101
MEF2C	1.48	1.26108	1.73913
MEF2D	1.43	1.23547	1.65367
MEIS1	1.47	1.27855	1.69733
MEIS2	1.38	1.18258	1.61555
MEIS3P1	1.6	1.35849	1.87293
MEN1	0.78	0.658892	0.925259
MEOX1	1.39	1.18258	1.63999
MEOX2	1.46	1.25703	1.69602
MERTK	1.39	1.1625	1.66291
MESD	0.74	0.64093	0.864856
MET	0.75	0.64314	0.884298
MGST2	0.79	0.678997	0.925929
MIB2	0.82	0.688784	0.973281
MIF	0.79	0.670737	0.936882
MINK1	0.7	0.592897	0.816996
MITF	1.35	1.13984	1.60928
MKI67	0.71	0.609303	0.829788
MKX	1.5	1.30186	1.72625
MLF1	1.54	1.33199	1.77555
MLH1	1.66	1.37517	2.01236
MLST8	0.73	0.620368	0.870055
MLX	0.67	0.577421	0.770811
MLXIP	1.37	1.17209	1.59118
MLXIPL	0.79	0.662976	0.951502
MMS19	0.84	0.70026	0.998259
MN1	1.56	1.35391	1.79403
MNX1	0.68	0.575881	0.792723
MOAP1	1.44	1.26837	1.64067
MOK	0.77	0.655737	0.910084
MORC4	0.73	0.617326	0.86515
MORF4L1	1.5	1.31554	1.7162
MOV10	0.71	0.613908	0.831145
MPL	1.39	1.21704	1.58472
MPP1	1.27	1.07696	1.50881
MPP2	1.39	1.2285	1.57636
MPP7	1.31	1.11612	1.546
MRAS	1.54	1.31312	1.81499
MRGPRF	1.51	1.31476	1.73848
MRPL28	0.77	0.652077	0.918378
MRRF	0.67	0.582117	0.780175
MRTFA	1.32	1.13653	1.52476
MRTFB	1.22	1.03388	1.43556
MS4A14	1.25	1.04971	1.48978
MS4A2	1.27	1.06965	1.49936
MS4A4A	1.2	1.00281	1.42548
MSC	1.35	1.1595	1.56988
MSH2	0.75	0.632272	0.887597
MSH6	0.81	0.689212	0.963281
MSI2	0.8	0.675079	0.950219
MSN	1.34	1.13964	1.57876
MSRB2	1.41	1.21832	1.63354
MSS51	1.26	1.06743	1.48101
MST1R	0.71	0.622632	0.816639
MSX2	0.81	0.683268	0.948847
MTA2	0.69	0.589829	0.814015
MTDH	0.71	0.616396	0.829178
MTERF2	1.32	1.1213	1.5447
MTF2	0.72	0.616567	0.839428
MTOR	0.83	0.696956	0.981628
MTSS1	1.54	1.31452	1.81383
MUC1	0.72	0.623554	0.825623
MUTYH	0.83	0.694418	0.99145
MXD1	0.72	0.622224	0.840465
MXD4	1.31	1.12462	1.5309
MYB	0.63	0.547493	0.734632
MYBBP1A	0.77	0.653932	0.917204
MYBL1	1.35	1.179	1.54031
MYBL2	0.72	0.619484	0.842322
MYC	0.76	0.636179	0.896477
MYCBP	0.67	0.584745	0.767362
MYCBP2	1.27	1.06578	1.50204
MYD88	0.77	0.673966	0.88967
MYH11	1.47	1.29976	1.65214
MYO10	0.77	0.663895	0.902124
MYO1E	0.69	0.592245	0.792323
MYO6	0.7	0.604447	0.802306
MYO9A	1.47	1.26887	1.69635
MYO9B	1.23	1.06149	1.43151
MYOCD	1.49	1.3118	1.69434
NAA15	0.75	0.638447	0.880287
NACC2	1.49	1.30946	1.68437
NAT14	1.51	1.30781	1.73521
NBN	0.75	0.633741	0.880092
NCAM1	1.45	1.25936	1.67918
NCLN	0.67	0.579967	0.784656
NCOA1	1.39	1.19373	1.61707
NCOA7	0.68	0.601732	0.763452
NCS1	1.48	1.30932	1.67732
NCSTN	0.76	0.651114	0.896214
NDC80	0.72	0.614435	0.842067
NDFIP2	0.69	0.604791	0.794031
NDN	1.56	1.36122	1.78838
NDP	1.63	1.36715	1.94739
NDRG1	0.68	0.578826	0.787578
NDRG2	1.21	1.02365	1.42763
NDST1	1.38	1.19127	1.59048
NECTIN2	0.71	0.61017	0.824242
NEDD4	1.51	1.29779	1.75005
NEK4	0.73	0.623628	0.84696
NEK6	0.77	0.655745	0.9097
NELFA	0.7	0.596733	0.831814
NELFB	0.8	0.673926	0.947905
NELFCD	0.73	0.621373	0.86628
NET1	0.73	0.626513	0.843164
NFAT5	1.37	1.16319	1.61206
NFATC1	1.34	1.14095	1.57542
NFATC2	1.27	1.07806	1.50187
NFATC4	1.56	1.3594	1.79602
NFE2L1	1.38	1.1894	1.60746
NFE2L3	0.71	0.608453	0.82007
NFIA	1.39	1.20097	1.60048
NFIB	1.32	1.1155	1.55642
NFIC	1.48	1.29797	1.69066
NFIL3	1.41	1.20264	1.65907
NFIX	1.44	1.25913	1.65702
NFKBIA	1.29	1.0801	1.53825
NFKBIZ	0.73	0.618038	0.865764
NFRKB	0.75	0.628401	0.89451
NFX1	0.82	0.688284	0.978855
NFXL1	0.7	0.600379	0.825496
NFYA	0.74	0.62639	0.866769
NFYB	1.21	1.02394	1.43406
NFYC	0.83	0.697389	0.988035
NGEF	0.73	0.621618	0.861866
NIF3L1	0.68	0.585545	0.798426
NIN	1.44	1.24075	1.67768
NISCH	1.44	1.24899	1.65811
NKIRAS1	1.46	1.27167	1.67167
NKRF	0.79	0.666556	0.929055
NKX2.3	1.2	1.01779	1.4162
NKX3.1	1.21	1.0306	1.42092
NKX3.2	1.25	1.04912	1.48236
NKX6.3	0.62	0.538702	0.72146
NLE1	0.78	0.659761	0.928059
NLGN1	1.5	1.32522	1.70879
NLRP1	1.28	1.07732	1.51062
NLRP3	1.19	1.00906	1.39226
NME1.NME2	0.77	0.655501	0.907131
NMI	0.67	0.570656	0.789413
NMRAL1	0.77	0.646796	0.91001
NOC2L	0.75	0.631738	0.88459
NOCT	0.81	0.680973	0.956334
NOD1	1.37	1.16867	1.5986
NOLC1	0.74	0.626002	0.866348
NONO	0.8	0.670878	0.946564
NOTCH2	1.44	1.23517	1.68195
NOTCH2NLA	1.51	1.29806	1.74939
NOTCH4	1.35	1.17468	1.55168
NOX1	0.77	0.650144	0.913605
NPAS2	0.71	0.6176	0.82444
NPHP1	1.62	1.39348	1.89323
NPR1	1.53	1.3118	1.7759
NPR2	1.47	1.2789	1.68981
NPR3	1.54	1.33302	1.7689
NPY1R	1.45	1.25695	1.67515
NR1D2	1.31	1.10594	1.54703
NR1H2	1.4	1.20129	1.64205
NR1I2	0.79	0.670405	0.942157
NR2C2	1.33	1.12527	1.57211
NR2F1	1.56	1.33756	1.81539
NR2F2	1.49	1.29943	1.70277
NR2F6	0.73	0.620986	0.863938
NR3C1	1.44	1.22975	1.68811
NR3C2	1.18	1.00039	1.39912
NR4A1	1.27	1.07707	1.49177
NR4A3	1.43	1.21052	1.68835
NR6A1	0.77	0.644809	0.925047
NRAS	0.7	0.610434	0.809421
NRK	1.42	1.21853	1.66443
NRXN1	1.47	1.28803	1.67818
NSD2	0.73	0.617752	0.865318
NSG2	1.28	1.12271	1.4534
NSMCE3	1.48	1.29585	1.68721
NTF3	1.31	1.11036	1.54429
NTRK2	1.48	1.28504	1.70668
NUDT4	1.3	1.1002	1.5352
NUFIP1	0.78	0.65884	0.933473
NUP62	0.78	0.660592	0.914735
NUP93	0.76	0.636537	0.897592
NUP98	0.69	0.591409	0.816205
NXN	1.55	1.35081	1.78504
OCRL	1.4	1.21393	1.61121
OMD	1.48	1.27477	1.71019
OPHN1	1.27	1.07254	1.49625
OR2A7	0.7	0.605474	0.80405
OR2H1	0.82	0.676133	0.989664
OR51E1	1.27	1.07992	1.4842
ORC2	0.75	0.634247	0.880371
OVOL1	0.7	0.597479	0.822406
OVOL2	0.73	0.637567	0.844826
OXSR1	0.7	0.596878	0.828124
P2RX1	1.19	1.01293	1.40504
P2RY12	1.27	1.08206	1.49301
P2RY14	1.44	1.24482	1.66215
P2RY6	1.23	1.04421	1.44163
P2RY8	1.21	1.02285	1.42233
PA2G4	0.74	0.621894	0.86942
PAFAH1B2	0.78	0.67081	0.909403
PAG1	0.82	0.693374	0.960296
PAK1	0.72	0.61868	0.845007
PAK1IP1	0.81	0.68896	0.949748
PAK2	0.79	0.67304	0.933438
PAK3	1.41	1.19494	1.65881
PAK4	0.79	0.67472	0.933727
PAK6	0.69	0.590794	0.811912
PALB2	0.7	0.59961	0.824362
PAQR8	0.77	0.657279	0.909637
PARP1	0.7	0.585664	0.827245
PASK	0.71	0.604258	0.835426
PATJ	0.73	0.619275	0.855221
PAWR	0.68	0.583742	0.803004
PAX6	1.24	1.04876	1.45441
PAX8	0.8	0.670523	0.946461
PAX9	0.81	0.684569	0.968071
PBX1	1.45	1.2493	1.69229
PBX3	1.52	1.33602	1.73345
PBXIP1	1.43	1.23163	1.65692
PC	0.83	0.7023	0.99164
PCBD1	0.78	0.657704	0.915121
PCBP1	0.81	0.678478	0.960472
PCGF1	0.79	0.670005	0.931616
PCM1	1.24	1.04433	1.46263
PCNA	0.7	0.598066	0.81031
PCSK6	0.75	0.636744	0.884534
PCSK7	1.34	1.14284	1.56493
PCSK9	0.69	0.596503	0.793621
PDCD11	0.78	0.659249	0.92717
PDCD1LG2	1.22	1.03017	1.44955
PDCD6	0.71	0.61354	0.831146
PDE10A	1.35	1.13707	1.60461
PDE1A	1.51	1.28918	1.7697
PDE1C	1.4	1.19138	1.63465
PDE2A	1.49	1.2972	1.72011
PDE3A	1.5	1.31745	1.71512
PDE3B	1.37	1.18204	1.58633
PDE4B	1.25	1.05912	1.48396
PDE4D	1.2	1.00774	1.43906
PDE4DIP	1.38	1.17729	1.62283
PDE5A	1.32	1.12931	1.54896
PDE7B	1.51	1.29495	1.76158
PDE8B	1.45	1.25693	1.6763
PDE9A	1.59	1.38757	1.82494
PDGFC	1.45	1.2253	1.72416
PDGFRA	1.4	1.18393	1.64819
PDGFRB	1.39	1.19326	1.63053
PDIA3	0.69	0.603917	0.790839
PDK1	0.64	0.548912	0.745746
PDK2	1.33	1.1377	1.55924
PDK3	1.31	1.12686	1.5193
PDK4	1.34	1.15605	1.54835
PDLIM1	0.73	0.647663	0.831079
PDPN	1.23	1.05084	1.44344
PDZD3	0.82	0.689441	0.979993
PDZD8	0.67	0.572594	0.773506
PEBP1	0.75	0.633633	0.88799
PECAM1	1.34	1.15414	1.54628
PEG10	1.56	1.35498	1.78675
PEG3	1.49	1.31428	1.69877
PER1	1.45	1.25647	1.68446
PER3	1.24	1.05015	1.45639
PEX11B	0.76	0.654958	0.881309
PEX14	0.77	0.651142	0.916692
PFDN5	1.4	1.1987	1.64506
PGAP2	0.71	0.601546	0.831718
PGBD1	1.47	1.27417	1.6975
PGR	1.49	1.29837	1.70348
PHB	0.71	0.600222	0.832757
PHB2	0.7	0.593689	0.834405
PHF1	1.48	1.28793	1.70512
PHF10	1.4	1.22225	1.60661
PHF2	1.45	1.26279	1.66022
PHF21A	1.44	1.24287	1.65883
PHF5A	0.79	0.670463	0.938173
PHF6	0.75	0.639033	0.880111
PHLDA3	1.57	1.35577	1.81473
PHTF2	1.22	1.02929	1.44453
PIAS1	1.22	1.02472	1.45328
PICALM	1.26	1.05662	1.5088
PIDD1	0.78	0.656144	0.930341
PIGU	0.71	0.604774	0.824578
PIK3C2B	0.69	0.589957	0.803536
PIK3CB	0.66	0.566726	0.762379
PIK3CD	1.24	1.05676	1.46223
PIK3R1	1.39	1.19031	1.6341
PIK3R3	1.22	1.04304	1.42473
PIM1	1.39	1.18389	1.6343
PINK1	1.4	1.21041	1.62978
PIP4K2B	1.54	1.31691	1.80757
PIP5K1A	0.75	0.625276	0.893179
PITPNM1	0.73	0.625162	0.844042
PITX2	1.62	1.39621	1.87026
PKD2	1.54	1.3351	1.77251
PKIA	1.54	1.32569	1.78676
PKIG	1.54	1.34112	1.76695
PKN2	0.69	0.594474	0.797467
PKN3	0.7	0.592192	0.826579
PKNOX2	1.48	1.28608	1.69507
PLA2G4C	1.43	1.22504	1.67571
PLAA	0.75	0.648979	0.868213
PLAG1	1.38	1.17542	1.63109
PLAGL1	1.48	1.25397	1.75816
PLAT	1.46	1.22338	1.73364
PLCB3	0.65	0.553896	0.753224
PLCD1	1.29	1.09551	1.51384
PLCD3	0.84	0.713961	0.993917
PLCD4	1.35	1.18076	1.54774
PLCH1	0.72	0.627525	0.816693
PLCL1	1.55	1.32666	1.80089
PLCL2	1.19	1.00438	1.42066
PLCXD3	1.4	1.21161	1.6283
PLEK2	0.7	0.615887	0.797918
PLEKHA1	0.71	0.61344	0.82454
PLEKHB1	1.3	1.09832	1.54445
PLEKHG1	1.25	1.0543	1.47734
PLEKHG2	1.46	1.25478	1.69811
PLEKHG4	0.83	0.700511	0.980307
PLEKHG6	0.79	0.666282	0.943658
PLEKHM3	1.47	1.26486	1.70557
PLP1	1.46	1.28867	1.66457
PLP2	0.81	0.688992	0.960655
PLPP1	1.52	1.30079	1.77383
PLPP3	1.54	1.29473	1.84153
PLXNA4	1.54	1.32681	1.79353
PLXNB2	0.75	0.642243	0.884521
PLXNC1	1.22	1.02699	1.44438
PMAIP1	0.78	0.657785	0.929251
PMEPA1	1.32	1.11452	1.5518
PMS2	0.73	0.620748	0.868271
PNRC1	1.44	1.23283	1.67299
POGK	0.81	0.683983	0.969248
POGZ	1.44	1.23032	1.67408
POLD1	0.71	0.602133	0.830362
POLE	0.73	0.61909	0.864795
POLR2A	0.71	0.613141	0.832137
POLR2L	0.82	0.692835	0.970417
POLR3C	0.77	0.648842	0.916596
POLR3G	0.73	0.617671	0.87034
POLR3K	0.67	0.576916	0.776732
POU2F2	1.24	1.06719	1.43737
POU2F3	0.73	0.627049	0.851319
POU5F1	0.76	0.644601	0.886417
POU6F1	1.48	1.30669	1.67707
PPARD	0.84	0.709604	0.990545
PPARG	0.73	0.643453	0.82837
PPARGC1A	1.36	1.14508	1.61557
PPBP	0.76	0.637796	0.906718
PPFIA1	0.75	0.640444	0.870724
PPM1L	1.2	1.01055	1.4358
PPP1CB	1.44	1.26227	1.646
PPP1R10	0.77	0.645441	0.913081
PPP1R12A	1.42	1.21713	1.64804
PPP1R12B	1.46	1.27287	1.6733
PPP1R13L	0.79	0.672153	0.93685
PPP1R15B	0.69	0.593193	0.8027
PPP1R16B	1.22	1.03554	1.42813
PPP1R17	1.21	1.05263	1.39324
PPP1R1A	1.56	1.36716	1.78564
PPP1R1B	0.69	0.58161	0.812453
PPP1R2	1.35	1.13997	1.60246
PPP1R8	0.76	0.643029	0.890578
PPP2R2B	1.32	1.11512	1.55962
PPP2R5A	0.79	0.673387	0.919313
PPP2R5D	0.74	0.615037	0.879874
PPP3CB	1.37	1.17443	1.5894
PPP4C	0.72	0.61652	0.842517
PPP4R1	0.77	0.650177	0.909678
PPP5C	0.78	0.662461	0.926925
PPRC1	0.79	0.667244	0.938503
PPT1	1.23	1.03067	1.46355
PRAM1	1.27	1.07957	1.49327
PRDM10	0.65	0.557387	0.756944
PRDM15	0.8	0.674749	0.950105
PRDM2	1.43	1.22477	1.67017
PRDM4	0.65	0.558463	0.757128
PRDM5	1.61	1.37539	1.88438
PRDM6	1.51	1.29171	1.75953
PRDX1	0.71	0.612346	0.819623
PRDX2	0.72	0.617872	0.842931
PRDX4	0.72	0.617318	0.841083
PREB	0.74	0.632	0.866001
PREX2	1.5	1.27312	1.75695
PRKAA2	1.48	1.30082	1.68442
PRKAB1	1.2	1.01995	1.41418
PRKAB2	1.29	1.09801	1.51936
PRKACA	1.49	1.28175	1.72743
PRKACB	1.43	1.21263	1.67577
PRKAG1	0.78	0.665306	0.902792
PRKAG2	1.37	1.16859	1.60171
PRKAR1A	1.5	1.26934	1.77468
PRKAR2A	0.81	0.6875	0.944012
PRKAR2B	1.46	1.24464	1.72107
PRKCB	1.46	1.25494	1.70877
PRKCD	0.76	0.645065	0.890802
PRKCE	1.43	1.2073	1.68942
PRKCH	1.21	1.02503	1.43446
PRKCI	0.7	0.60081	0.804653
PRKCQ	1.19	1.01675	1.39075
PRKCSH	0.82	0.685151	0.973188
PRKCZ	0.7	0.59471	0.817566
PRKD1	1.49	1.27998	1.7408
PRKD3	1.4	1.19864	1.64456
PRKDC	0.74	0.62653	0.871388
PRKG1	1.51	1.31321	1.7421
PRMT1	0.77	0.654816	0.914597
PRMT2	1.52	1.31871	1.75097
PRMT5	0.78	0.659548	0.923631
PRMT6	0.75	0.629425	0.895849
PRMT7	0.78	0.654679	0.927526
PRRX1	1.35	1.15112	1.58668
PRSS8	0.76	0.645357	0.895427
PSD3	1.44	1.21289	1.71587
PSD4	0.73	0.619983	0.861324
PSEN1	0.7	0.610276	0.803128
PSENEN	0.84	0.7042	0.991543
PSIP1	1.31	1.12702	1.52327
PSMC3	0.8	0.6762	0.948152
PSMC3IP	0.72	0.616945	0.839895
PSMD9	0.67	0.571891	0.780104
PSPC1	0.66	0.572496	0.767209
PSRC1	0.73	0.620964	0.867048
PTAFR	0.79	0.677886	0.927537
PTCH1	1.42	1.20414	1.67057
PTEN	1.38	1.18473	1.61826
PTGDR2	0.83	0.700623	0.989777
PTGER1	1.45	1.22496	1.7055
PTGER2	1.29	1.09463	1.5247
PTGER3	1.53	1.31244	1.78954
PTGES2	0.7	0.590824	0.821057
PTGES3	0.73	0.633173	0.853032
PTGFR	1.42	1.21012	1.66232
PTGIS	1.53	1.33537	1.75694
PTH2R	1.29	1.0925	1.52406
PTHLH	1.37	1.16869	1.60548
PTK2	0.75	0.635129	0.893532
PTK7	1.29	1.10581	1.51187
PTN	1.56	1.35662	1.79735
PTPN14	1.55	1.34594	1.77646
PTPN22	0.8	0.675586	0.949822
PTPRB	1.36	1.1477	1.60447
PTPRD	1.49	1.26492	1.76676
PTPRF	0.74	0.632856	0.871168
PTPRG	1.29	1.08164	1.53842
PTPRH	0.77	0.664871	0.892667
PTPRJ	0.73	0.637266	0.843162
PTPRK	0.72	0.621626	0.844463
PTPRM	1.53	1.31189	1.78329
PTPRS	1.54	1.34855	1.75432
PTPRT	1.29	1.09602	1.51417
PTPRU	1.19	1.00388	1.40421
PTPRZ1	1.31	1.10503	1.56427
PTTG1	0.71	0.614509	0.827931
PUF60	0.75	0.633705	0.88761
PURA	1.44	1.25855	1.65827
PURB	1.25	1.0662	1.47311
PWP2	0.75	0.633789	0.878785
PYCARD	0.72	0.621082	0.824173
PYGO1	1.52	1.30693	1.77804
QKI	1.47	1.24964	1.72237
RAB10	0.68	0.590625	0.779357
RAB12	1.5	1.3116	1.71747
RAB14	0.68	0.587836	0.78407
RAB15	0.75	0.63525	0.894946
RAB17	0.83	0.69986	0.979662
RAB18	1.24	1.04628	1.48051
RAB20	0.72	0.62768	0.834619
RAB22A	0.8	0.670967	0.944542
RAB23	1.5	1.31126	1.7235
RAB25	0.71	0.614932	0.826503
RAB26	0.76	0.650189	0.899158
RAB29	1.55	1.32586	1.82269
RAB2A	0.74	0.643715	0.852211
RAB2B	1.44	1.24794	1.67017
RAB30	1.35	1.14064	1.58814
RAB31	1.42	1.21107	1.67645
RAB32	1.39	1.16642	1.65372
RAB33B	1.34	1.14562	1.57667
RAB34	1.54	1.32661	1.78645
RAB37	1.23	1.04122	1.45847
RAB38	1.27	1.06647	1.51564
RAB39B	1.18	1.00528	1.39269
RAB3B	1.51	1.28129	1.78771
RAB40C	0.73	0.616982	0.864287
RAB5B	1.28	1.08299	1.52334
RAB5C	0.82	0.697251	0.964878
RAB6B	1.48	1.2967	1.70046
RAB8B	1.23	1.03759	1.4586
RAB9B	1.46	1.26614	1.69376
RABEP1	1.32	1.11904	1.56418
RABGAP1	1.45	1.26	1.67544
RABIF	0.66	0.565245	0.767065
RABL2A	1.44	1.26147	1.64287
RABL2B	0.79	0.664444	0.929106
RAC1	0.75	0.655205	0.857018
RACGAP1	0.75	0.635068	0.878047
RAD21	0.78	0.658721	0.913617
RAD51	0.7	0.606614	0.81742
RAD9A	0.75	0.636186	0.893634
RALA	0.71	0.621947	0.816041
RALGAPA1	1.21	1.02306	1.4368
RALGAPA2	0.66	0.573562	0.760904
RALGPS1	0.73	0.615967	0.854709
RALGPS2	0.76	0.654935	0.878638
RAMP1	1.45	1.23156	1.69721
RAMP2	1.52	1.30713	1.77236
RAMP3	1.29	1.09264	1.51297
RAN	0.73	0.623821	0.850575
RANBP1	0.71	0.601543	0.83435
RANBP2	0.84	0.719866	0.989542
RANGAP1	0.77	0.65003	0.909165
RAP1A	1.44	1.24193	1.67028
RAP1GAP2	0.67	0.571959	0.790726
RAP2C	0.75	0.641722	0.867378
RAPGEF1	1.26	1.07974	1.47444
RAPGEF2	1.24	1.03719	1.47375
RAPGEF3	1.21	1.01756	1.42793
RAPGEF4	1.42	1.19864	1.67043
RAPGEFL1	0.71	0.605332	0.825049
RAPH1	0.71	0.621767	0.813211
RARB	1.56	1.31451	1.85573
RASAL1	0.82	0.698023	0.974132
RASEF	0.72	0.627025	0.835151
RASGEF1A	1.42	1.21078	1.67253
RASGEF1B	0.8	0.669218	0.944719
RASGRF2	1.33	1.14144	1.5485
RASGRP2	1.5	1.2868	1.75441
RASIP1	1.37	1.17841	1.58179
RASL11A	1.37	1.16507	1.60883
RASL11B	1.55	1.36069	1.77422
RASL12	1.56	1.33367	1.81608
RASSF1	0.72	0.601582	0.853037
RASSF2	1.38	1.17062	1.62951
RASSF7	0.7	0.604963	0.80919
RASSF8	1.56	1.35009	1.79421
RASSF9	1.54	1.31072	1.80196
RBBP8	0.68	0.594528	0.78713
RBCK1	0.76	0.638005	0.89668
RBFOX2	1.52	1.31963	1.74662
RBL1	0.71	0.606662	0.827695
RBM10	0.78	0.651752	0.924213
RBM14	0.82	0.692557	0.979462
RBM15	0.7	0.59845	0.82144
RBPMS	1.53	1.34723	1.74508
RBSN	1.41	1.22888	1.60978
RCAN1	1.33	1.12542	1.58026
RCAN2	1.49	1.31171	1.70151
RCOR1	0.71	0.61014	0.822309
RCOR3	1.38	1.18985	1.59916
RELN	1.38	1.17654	1.60967
REM2	0.79	0.659374	0.940135
RERE	1.41	1.20915	1.6491
RERG	1.54	1.35797	1.7435
RERGL	1.37	1.17981	1.59043
RET	1.53	1.32431	1.77047
REXO4	0.77	0.645528	0.906903
RFC4	0.73	0.621675	0.853728
RFX2	1.41	1.22678	1.61954
RFX3	0.68	0.578396	0.809503
RFXANK	0.75	0.637329	0.893139
RGL1	1.49	1.26554	1.75702
RGL4	1.2	1.02397	1.40185
RGMA	1.5	1.31126	1.70457
RGMB	1.45	1.26117	1.66155
RGN	1.57	1.32905	1.84464
RGS10	1.19	1.00531	1.41931
RGS13	1.22	1.03086	1.44854
RGS14	0.69	0.583535	0.816503
RGS17	1.34	1.13062	1.59487
RGS18	1.21	1.01353	1.43436
RGS2	1.47	1.25801	1.7151
RGS4	1.54	1.3226	1.78324
RGS5	1.5	1.28055	1.7574
RGS7BP	1.38	1.16307	1.63544
RHBDL3	1.46	1.27666	1.66502
RHOB	1.46	1.27159	1.67971
RHOBTB2	1.51	1.30273	1.75386
RHOD	0.82	0.694684	0.973002
RHOJ	1.53	1.31918	1.77875
RHOQ	1.5	1.29722	1.73053
RHOT2	0.74	0.62623	0.885199
RHOU	1.33	1.11124	1.58704
RHOV	0.67	0.571904	0.783584
RHOXF1	1.24	1.0645	1.43573
RHOXF2B	1.41	1.20438	1.6514
RHPN2	0.69	0.609467	0.787656
RICTOR	1.21	1.01991	1.44017
RIN1	0.7	0.608481	0.810809
RIN3	1.39	1.18721	1.62581
RINT1	0.75	0.644943	0.880278
RIPK2	0.69	0.595862	0.806885
RND2	1.58	1.35587	1.83043
RNF138	0.75	0.638545	0.876611
RNF14	1.42	1.21941	1.65688
RNF213	0.73	0.625257	0.863287
RNF43	0.73	0.616226	0.862104
RNF6	0.67	0.58755	0.766744
ROBO1	1.54	1.30562	1.80706
ROBO2	1.47	1.23151	1.74807
ROCK1	1.42	1.21416	1.65984
ROPN1B	1.58	1.34781	1.84252
ROR1	1.56	1.34635	1.81268
ROR2	1.5	1.31065	1.72607
RORA	1.39	1.18251	1.64188
RORB	1.23	1.04156	1.45584
RPL7L1	0.77	0.648123	0.909722
RPN1	0.69	0.601561	0.79396
RPS6KA1	0.64	0.552915	0.748923
RPS6KA2	1.43	1.21082	1.67793
RPS6KA5	1.33	1.15108	1.54175
RPS6KA6	1.52	1.30875	1.76246
RPS6KB2	0.74	0.626249	0.878075
RPS6KC1	1.48	1.26346	1.74004
RRAD	1.6	1.35744	1.8882
RRAGB	1.43	1.2436	1.64683
RRAGC	0.77	0.663588	0.904335
RRAS	1.5	1.28932	1.75126
RRBP1	0.74	0.625628	0.865193
RREB1	0.67	0.572441	0.786419
RRN3	0.77	0.652015	0.902908
RSC1A1	0.72	0.619382	0.838681
RSF1	1.38	1.17299	1.6133
RSU1	1.43	1.23486	1.66417
RTKN	0.78	0.660904	0.918333
RTKN2	0.71	0.599569	0.836882
RTL3	1.54	1.34959	1.75603
RTN1	1.37	1.16516	1.61801
RTN2	1.42	1.21235	1.66188
RUNDC3A	1.41	1.23455	1.61246
RUNX1T1	1.53	1.326	1.76513
RUNX2	1.24	1.05324	1.46673
RUSC1	0.74	0.627275	0.870139
RUVBL1	0.69	0.601836	0.795251
RUVBL2	0.71	0.599617	0.831422
RYBP	1.25	1.04911	1.48833
RYK	1.39	1.18688	1.63078
S100A10	0.76	0.656971	0.890565
S100A11	0.78	0.672173	0.901116
S100A6	0.73	0.628101	0.837174
S1PR1	1.46	1.24736	1.71529
S1PR2	1.24	1.05722	1.4628
S1PR3	1.52	1.32458	1.75392
S1PR5	1.18	1.01015	1.37958
SAFB	0.8	0.669509	0.945565
SALL2	1.53	1.34407	1.73908
SAP18	0.8	0.685216	0.936354
SAP30L	1.4	1.19953	1.62588
SARM1	1.47	1.25098	1.72819
SATB1	1.36	1.16775	1.58446
SATB2	0.73	0.620759	0.856645
SAV1	1.34	1.14027	1.58157
SCARB1	0.77	0.6503	0.919442
SCARF1	1.24	1.05794	1.45552
SCG2	1.32	1.14353	1.51351
SCG5	1.41	1.19612	1.65929
SCGB1A1	0.83	0.694934	0.993992
SCMH1	1.46	1.29554	1.64623
SCML1	0.84	0.715209	0.993555
SCML4	0.81	0.684378	0.951294
SCT	1.34	1.14732	1.556
SCTR	1.34	1.12976	1.59426
SDCBP2	0.77	0.665498	0.90197
SDHA	0.67	0.565012	0.785156
SDHB	0.72	0.619852	0.842321
SDHC	0.73	0.62376	0.85302
SEC14L2	0.7	0.607381	0.811586
SEC31A	1.35	1.13552	1.60385
SECTM1	0.7	0.592763	0.819457
SELE	1.27	1.089	1.48325
SELENOS	0.74	0.637325	0.854792
SEPTIN5	1.51	1.32609	1.71201
SEPTIN6	1.35	1.15988	1.57203
SERGEF	1.46	1.28894	1.65948
SERP2	1.58	1.34025	1.86519
SERTAD2	1.28	1.07458	1.51422
SET	0.81	0.683696	0.963758
SETBP1	1.53	1.33652	1.75772
SETD7	1.39	1.20261	1.61237
SETDB1	0.72	0.605942	0.847422
SF1	0.83	0.700008	0.98009
SFMBT1	0.68	0.580901	0.794928
SFMBT2	1.25	1.06033	1.47748
SFN	0.7	0.603475	0.814849
SFPQ	0.71	0.604034	0.844435
SGK2	0.77	0.654941	0.904864
SGPL1	0.73	0.634624	0.846979
SGSM1	1.51	1.28427	1.77555
SGSM2	1.41	1.23407	1.60898
SH2B3	1.31	1.10369	1.54925
SH2D2A	0.76	0.644316	0.888294
SH2D3A	0.73	0.637203	0.837567
SH2D3C	1.33	1.14583	1.55169
SH3BGR	1.35	1.18272	1.5503
SH3BGRL	1.47	1.26683	1.7122
SH3BP1	0.72	0.611842	0.854213
SH3BP5	1.45	1.23994	1.69864
SH3GL3	1.35	1.16477	1.55875
SH3RF1	0.75	0.640871	0.87329
SHC2	1.45	1.25206	1.68257
SHC3	1.42	1.22612	1.64751
SHC4	1.57	1.35824	1.81717
SHH	0.78	0.66136	0.911279
SIK1	1.2	1.02162	1.40219
SIK2	1.44	1.22791	1.69573
SIM2	0.69	0.594088	0.808353
SIN3A	1.39	1.19375	1.62263
SIN3B	1.43	1.24829	1.64465
SIPA1	1.38	1.19902	1.58945
SIPA1L2	1.31	1.10516	1.55882
SIPA1L3	0.75	0.631836	0.879089
SIRT1	1.45	1.25508	1.68249
SIRT4	1.22	1.04156	1.42223
SIRT5	0.71	0.597887	0.835674
SIRT7	0.68	0.592503	0.789351
SIX2	1.54	1.33784	1.76584
SKAP2	1.46	1.24729	1.70745
SLC1A2	1.42	1.20574	1.66432
SLC20A1	0.75	0.641176	0.874568
SLC22A17	1.53	1.33672	1.74893
SLC2A4RG	1.25	1.07308	1.46234
SLC35B2	0.75	0.636102	0.877563
SLC4A11	0.7	0.60204	0.816062
SLC7A1	0.7	0.594281	0.813478
SLC7A3	1.38	1.18836	1.60315
SLC9A3R1	0.72	0.610862	0.840607
SLIRP	0.79	0.671671	0.924107
SLIT2	1.55	1.33226	1.81151
SMAD5	1.2	1.01451	1.42787
SMAD6	0.75	0.636115	0.891302
SMAD7	1.46	1.24051	1.70682
SMAD9	1.49	1.30636	1.70136
SMARCA1	1.58	1.36574	1.82663
SMARCA2	1.44	1.26	1.653
SMARCA4	0.75	0.633734	0.880813
SMARCB1	0.73	0.621723	0.864596
SMARCC1	0.69	0.590435	0.814435
SMARCD1	0.77	0.655447	0.902352
SMARCD2	0.71	0.595555	0.834591
SMARCD3	1.58	1.37777	1.81855
SMC1A	0.74	0.630797	0.877094
SMC3	0.8	0.681507	0.948054
SMOC1	1.36	1.14916	1.61533
SMOC2	1.49	1.30821	1.69294
SMPD1	1.25	1.05489	1.48368
SMPD2	0.73	0.620337	0.85346
SMURF2	1.24	1.04616	1.4712
SMYD1	1.47	1.29666	1.65603
SNAI2	1.24	1.05605	1.44799
SNAPC3	1.23	1.05431	1.44423
SNAPC5	1.25	1.06729	1.4532
SNCA	1.35	1.13643	1.60113
SNCAIP	1.38	1.17448	1.63251
SND1	0.71	0.604791	0.824561
SNIP1	1.2	1.01423	1.42225
SNW1	0.8	0.686052	0.929179
SNX27	1.18	1.00945	1.38307
SNX29	1.44	1.234	1.67258
SOCS2	1.21	1.00936	1.44336
SOCS3	1.2	1.02341	1.41637
SOCS5	1.52	1.30422	1.77422
SOCS6	0.71	0.612308	0.826016
SOD1	0.75	0.6365	0.881284
SOHLH1	1.22	1.02726	1.44226
SORBS1	1.44	1.26979	1.63892
SORBS3	1.55	1.34691	1.78309
SORCS1	1.45	1.25942	1.67806
SORCS2	1.49	1.27362	1.73509
SOS2	1.35	1.13674	1.59419
SOX10	1.46	1.29183	1.65182
SOX15	1.47	1.30467	1.65741
SOX17	1.47	1.26542	1.70868
SOX2	1.38	1.17242	1.63138
SOX5	1.49	1.27133	1.73806
SOX6	1.35	1.13212	1.59909
SOX7	1.4	1.20133	1.6222
SOX8	1.45	1.24025	1.70037
SOX9	0.71	0.607026	0.819764
SP1	0.71	0.601319	0.837379
SP3	0.76	0.639528	0.901751
SP4	1.36	1.17424	1.58652
SP6	0.72	0.614963	0.854365
SP8	0.74	0.630417	0.879311
SPA17	0.83	0.696709	0.980237
SPAG5	0.73	0.625179	0.856191
SPARCL1	1.54	1.34672	1.75938
SPDEF	0.81	0.684446	0.949037
SPG21	0.73	0.620339	0.856959
SPOCK1	1.36	1.16115	1.5879
SPOP	1.5	1.32609	1.70417
SPRY1	1.51	1.2898	1.76123
SPSB1	1.34	1.14706	1.56614
SPTBN1	0.7	0.589826	0.823584
SRC	0.75	0.636967	0.876281
SREBF1	0.64	0.54866	0.756563
SREBF2	0.78	0.660291	0.926912
SRF	1.43	1.2468	1.63519
SRGAP3	1.32	1.11767	1.55498
SRI	0.76	0.656935	0.883245
SRPK1	0.68	0.583746	0.782954
SRSF10	0.72	0.601252	0.854787
SRSF2	0.72	0.621282	0.845785
SRSF3	0.74	0.627155	0.864319
SSBP2	1.5	1.30927	1.71303
SSRP1	0.71	0.606154	0.839611
SSTR2	1.55	1.32922	1.81579
SSX3	0.81	0.671975	0.981777
SSX4	1.2	1.02848	1.40786
ST18	1.24	1.04324	1.46205
STAC	1.5	1.29929	1.73028
[truncated: 607 more rows]

## Sheet: DFS.ACRG
row.names	HR	low	high
Name
ABCA1	1.33	1.10622	1.60946
ABCC9	1.53	1.3161	1.78308
ABCG1	1.32	1.10063	1.57588
ABI1	0.71	0.614253	0.83111
ABLIM3	1.58	1.33777	1.85995
ABT1	0.72	0.607983	0.859021
ACAD8	0.67	0.568033	0.79609
ACKR1	1.46	1.23971	1.71572
ACKR3	1.25	1.06187	1.481
ACOT11	0.8	0.667235	0.959717
ACTL6A	0.78	0.657884	0.916252
ACTN2	1.49	1.31032	1.70311
ACTR5	0.74	0.617067	0.881866
ACVR1	1.4	1.1422	1.70894
ACVR1B	0.74	0.614979	0.88166
ACVRL1	1.27	1.0741	1.50294
ADA	0.73	0.604103	0.871189
ADAM10	0.67	0.573799	0.788917
ADAM9	0.73	0.622182	0.855276
ADAMTS1	1.45	1.23186	1.71312
ADAP1	0.71	0.603224	0.842983
ADAP2	1.24	1.0357	1.48503
ADCY1	1.52	1.27329	1.80536
ADCY2	1.58	1.36011	1.83384
ADCY4	1.27	1.07883	1.49807
ADCY5	1.52	1.31092	1.76517
ADCY6	0.83	0.69342	0.988694
ADCYAP1	1.36	1.14975	1.61181
ADCYAP1R1	1.45	1.24668	1.68092
ADGRA2	1.5	1.28139	1.75992
ADGRD1	1.44	1.21414	1.7069
ADGRF1	0.78	0.658609	0.920599
ADGRG2	1.25	1.05872	1.48225
ADGRG7	0.7	0.585527	0.845354
ADGRL2	1.6	1.34067	1.90663
ADGRL4	1.39	1.1744	1.63943
ADH1A	1.33	1.11448	1.57906
ADIPOR1	0.83	0.68807	0.989265
ADIPOR2	0.77	0.651365	0.908368
ADNP2	0.73	0.611452	0.867669
ADORA1	1.27	1.08357	1.49458
ADORA2B	0.83	0.687928	0.994126
ADORA3	1.33	1.10922	1.59277
ADRB2	1.43	1.21311	1.67988
AEBP1	1.44	1.22881	1.69669
AEN	0.72	0.599248	0.855944
AFAP1L2	1.6	1.32738	1.93505
AFDN	0.77	0.632929	0.927367
AFF1	1.36	1.13362	1.62039
AFF3	1.45	1.23208	1.70182
AFF4	1.31	1.09054	1.57899
AFP	0.81	0.669762	0.974112
AGAP11	1.42	1.19684	1.68698
AGAP7P	0.78	0.660303	0.926787
AGFG1	0.73	0.628427	0.849111
AGO2	0.81	0.679648	0.970517
AGPAT2	0.7	0.590419	0.825146
AGT	1.36	1.11663	1.66292
AGTR1	1.52	1.32587	1.74552
AHCTF1	0.83	0.697782	0.991574
AHR	0.78	0.664188	0.916417
AHRR	0.65	0.543417	0.77743
AIFM1	0.66	0.555762	0.773255
AIFM2	0.7	0.582168	0.83454
AIMP1	0.78	0.670288	0.919163
AJUBA	0.8	0.671638	0.955193
AKAP10	1.25	1.04655	1.50297
AKAP11	1.28	1.06631	1.54047
AKAP12	1.58	1.3531	1.84164
AKAP8	0.79	0.664555	0.947771
AKT3	1.59	1.35929	1.86458
ALCAM	0.84	0.703717	0.996411
ALDH1A2	1.47	1.26119	1.7106
ANGPTL4	1.42	1.1854	1.71226
ANK2	1.52	1.31277	1.76323
ANKDD1A	1.5	1.28528	1.74037
ANKZF1	0.74	0.614017	0.896213
ANP32A	0.73	0.609139	0.883727
ANTXR1	1.41	1.19188	1.67264
ANXA3	0.81	0.687837	0.95867
ANXA4	0.73	0.620479	0.848033
ANXA5	1.43	1.18746	1.71052
ANXA9	1.27	1.0637	1.51598
APAF1	0.67	0.581712	0.77039
APBB1	1.54	1.32882	1.79133
APBB2	1.3	1.07668	1.57116
APEX1	0.76	0.637572	0.906455
APH1A	0.71	0.59923	0.840284
APH1B	1.52	1.2728	1.82172
APPL2	0.74	0.62335	0.870343
AR	1.55	1.34729	1.78566
ARF1	0.73	0.609987	0.865915
ARF3	0.77	0.640347	0.920981
ARF5	0.81	0.68219	0.971656
ARFGEF1	0.75	0.640628	0.881581
ARFGEF2	0.73	0.617739	0.865589
ARFGEF3	0.73	0.610778	0.86406
ARFIP2	0.71	0.596763	0.833263
ARHGAP1	1.34	1.11691	1.6027
ARHGAP10	1.52	1.32351	1.73998
ARHGAP11A	0.71	0.604043	0.838306
ARHGAP11B	0.75	0.624443	0.900585
ARHGAP12	0.72	0.61528	0.852534
ARHGAP15	1.21	1.01188	1.4521
ARHGAP18	0.68	0.591315	0.787715
ARHGAP20	1.53	1.31269	1.78158
ARHGAP22	1.43	1.2229	1.66562
ARHGAP24	1.47	1.23926	1.74655
ARHGAP27	0.73	0.615785	0.862573
ARHGAP28	1.41	1.17494	1.70406
ARHGAP29	1.55	1.28443	1.85989
ARHGAP31	1.42	1.20054	1.68744
ARHGAP32	0.71	0.600378	0.832506
ARHGAP39	0.79	0.667801	0.945202
ARHGAP6	1.46	1.24371	1.7058
ARHGEF10	1.58	1.34085	1.85119
ARHGEF15	1.32	1.133	1.54918
ARHGEF16	0.69	0.588438	0.806544
ARHGEF17	1.55	1.33253	1.79879
ARHGEF2	1.35	1.12284	1.61237
ARHGEF25	1.52	1.32435	1.73531
ARHGEF26	1.49	1.28564	1.73325
ARHGEF3	1.35	1.1317	1.61752
ARHGEF37	1.27	1.06274	1.51106
ARHGEF39	0.72	0.600413	0.854074
ARHGEF4	1.49	1.28518	1.72269
ARHGEF40	1.3	1.10967	1.51723
ARHGEF5	0.7	0.595499	0.821969
ARHGEF6	1.28	1.07392	1.53273
ARHGEF9	1.49	1.29772	1.71751
ARID1B	1.36	1.14775	1.60556
ARID3B	0.67	0.573043	0.791395
ARID4A	1.26	1.04643	1.51231
ARID5A	1.42	1.20993	1.6622
ARID5B	1.45	1.22383	1.7295
ARL2BP	1.42	1.18191	1.70394
ARL3	1.47	1.26506	1.70192
ARL4C	1.32	1.11317	1.55974
ARL4D	1.56	1.3629	1.77735
ARL5B	0.7	0.598878	0.816695
ARL6	1.39	1.16443	1.65873
ARL8A	1.3	1.08968	1.55595
ARNT	1.49	1.24837	1.77118
ARNT2	1.54	1.31621	1.80687
ARNTL2	0.74	0.630078	0.880513
ARRB1	1.29	1.08092	1.53194
ARTN	1.4	1.18607	1.64581
ASAH2B	0.79	0.651491	0.9625
ASAP1	1.44	1.2005	1.71657
ASAP2	0.75	0.635618	0.884668
ASAP3	1.37	1.15148	1.63423
ASB1	1.45	1.25624	1.68141
ASB2	1.43	1.21506	1.68177
ASB5	1.48	1.30104	1.67517
ASCC1	1.47	1.23842	1.73701
ASCC2	0.77	0.639065	0.917046
ASCC3	0.68	0.580444	0.793317
ASCL2	0.74	0.608127	0.894622
ASF1B	0.7	0.595668	0.813202
ASMTL	1.36	1.16481	1.59347
ASXL3	1.53	1.30442	1.78991
ATAD2	0.75	0.637615	0.891772
ATF1	0.73	0.622787	0.861636
ATF5	0.69	0.574857	0.818644
ATF7	1.52	1.30347	1.76668
ATF7IP	1.34	1.11957	1.59753
ATG10	1.35	1.12725	1.62652
ATIC	0.77	0.641745	0.917892
ATM	1.35	1.12829	1.61452
ATOH1	0.75	0.627352	0.905247
ATOH8	1.48	1.28438	1.71268
ATP2A2	0.72	0.611674	0.840908
ATP2C1	0.75	0.639246	0.881355
ATP8B1	0.72	0.611174	0.843565
ATR	0.77	0.645475	0.916569
ATRIP	0.78	0.653445	0.934835
ATRNL1	1.52	1.29466	1.77899
ATRX	1.39	1.17986	1.63485
ATXN1	1.52	1.29839	1.77639
ATXN3	1.44	1.24082	1.67916
AURKA	0.71	0.608991	0.836043
AURKB	0.74	0.624926	0.869006
AXIN1	0.78	0.649387	0.943147
AXL	1.46	1.22871	1.73683
B2M	0.82	0.69238	0.97563
BACH2	1.29	1.09537	1.52229
BAG1	0.73	0.613936	0.85824
BAG4	0.8	0.669164	0.94941
BAIAP2L1	0.73	0.629179	0.849797
BAIAP2L2	0.68	0.572547	0.80713
BAK1	0.68	0.585401	0.79544
BARD1	0.77	0.646001	0.912618
BARX1	1.53	1.33856	1.74536
BARX2	0.74	0.623896	0.871636
BASP1	1.26	1.06253	1.50236
BAX	0.81	0.670905	0.980731
BAZ1A	0.69	0.583499	0.823503
BAZ2A	0.71	0.601727	0.837663
BAZ2B	1.26	1.05491	1.51306
BBC3	0.72	0.5939	0.876136
BBX	1.47	1.23912	1.74155
BCL10	0.7	0.602862	0.811987
BCL2	1.3	1.10061	1.54018
BCL2L1	0.82	0.686995	0.989504
BCL3	0.77	0.63779	0.927451
BCL6	1.52	1.29243	1.7771
BCL6B	1.31	1.12108	1.52697
BCLAF1	0.73	0.613336	0.857613
BDKRB1	1.38	1.17159	1.61904
BEX3	1.69	1.43385	1.99174
BHLHE22	1.41	1.19599	1.66923
BHLHE41	1.22	1.00591	1.47145
BID	0.72	0.620991	0.845974
BIRC7	0.82	0.685552	0.977804
BLM	0.71	0.602844	0.840496
BMP4	1.27	1.0518	1.53059
BMPR1A	1.47	1.28994	1.68632
BMPR1B	1.56	1.35466	1.79678
BMPR2	1.41	1.17189	1.69394
BMX	1.38	1.17345	1.61315
BNC2	1.52	1.28932	1.78155
BNIP3	1.57	1.34148	1.84877
BRAF	1.29	1.06947	1.55848
BRAP	0.77	0.650612	0.921549
BRCA1	0.75	0.629957	0.888647
BRCA2	0.73	0.611275	0.860765
BRCC3	0.73	0.612002	0.859209
BRIP1	0.72	0.609799	0.847813
BRPF1	0.79	0.662628	0.950957
BSG	0.74	0.621088	0.892127
BTG2	1.4	1.20223	1.64045
BTRC	1.36	1.13914	1.63089
BUB1B	0.74	0.627627	0.878075
BUD31	0.81	0.68399	0.954836
BZW1	0.82	0.696597	0.963201
C1QBP	0.7	0.59418	0.826285
CABYR	1.68	1.40174	2.00669
CACNA1A	1.34	1.12716	1.5872
CACNB4	1.35	1.14286	1.60598
CAD	0.84	0.700307	0.998513
CALCRL	1.33	1.12298	1.57092
CALM1	1.39	1.20321	1.59941
CALR	0.72	0.616241	0.837479
CAMK1	1.49	1.28396	1.7374
CAMLG	1.33	1.13166	1.56193
CAMTA2	1.33	1.1311	1.56553
CAND1	0.77	0.65227	0.904707
CAND2	1.54	1.33959	1.77687
CANT1	0.67	0.565512	0.783099
CAP2	1.53	1.3383	1.74767
CAPN15	0.69	0.580754	0.821383
CAPN5	0.72	0.607913	0.852768
CARD10	0.71	0.595517	0.84485
CARD14	0.82	0.681797	0.9965
CARD19	0.79	0.657812	0.957771
CARD8	1.3	1.08769	1.55328
CARF	1.34	1.13884	1.58487
CARS1	0.67	0.572456	0.782317
CARTPT	1.45	1.26424	1.65567
CASK	0.7	0.602555	0.814236
CASKIN1	0.77	0.644554	0.927841
CASP10	0.65	0.564763	0.747146
CASP3	0.68	0.587265	0.793997
CASP7	0.7	0.598301	0.809866
CASP8	0.68	0.577867	0.801488
CAV1	1.54	1.31849	1.79937
CAV2	1.6	1.35296	1.89583
CAVIN1	1.56	1.34654	1.81888
CBFA2T3	1.24	1.05008	1.46961
CBFB	0.78	0.657368	0.914004
CBL	1.37	1.1485	1.62422
CBLB	0.82	0.683796	0.989755
CBLC	0.69	0.584618	0.813705
CBX3	0.74	0.624037	0.871906
CBX5	1.45	1.24851	1.6936
CBX6	1.53	1.31	1.77784
CBX7	1.41	1.21469	1.63511
CBY1	1.4	1.18875	1.65896
CC2D1A	0.67	0.559366	0.811875
CCAR1	0.71	0.597357	0.844666
CCDC47	0.69	0.587946	0.807251
CCDC59	0.78	0.659856	0.913777
CCDC88C	0.62	0.514311	0.743604
CCKAR	1.32	1.11831	1.54757
CCL15	1.33	1.11295	1.57833
CCL2	1.3	1.09631	1.54552
CCL24	0.71	0.60692	0.830024
CCL26	1.22	1.02789	1.45391
CCL28	0.72	0.60461	0.854062
CCN2	1.52	1.27915	1.79532
CCN4	1.26	1.05674	1.50169
CCN5	1.42	1.22383	1.65219
CCNA2	0.73	0.62618	0.854632
CCNC	0.68	0.587591	0.795722
CCND1	0.74	0.626035	0.873062
CCNE1	0.76	0.639379	0.907428
CCNK	0.66	0.565126	0.760515
CCNT1	0.79	0.666769	0.947509
CCR10	1.34	1.12503	1.60288
CCR6	0.66	0.567607	0.773923
CD160	1.21	1.01201	1.44768
CD164	0.7	0.600191	0.813897
CD24	0.72	0.613073	0.855862
CD247	0.81	0.665072	0.979913
CD2AP	0.7	0.603794	0.80682
CD34	1.4	1.20818	1.62109
CD36	1.35	1.12627	1.61974
CD40	1.29	1.06683	1.55033
CD44	1.27	1.04306	1.54023
CD5	1.22	1.01709	1.45681
CD72	1.23	1.03163	1.46926
CDC37	0.75	0.620901	0.894676
CDC42EP1	0.68	0.581772	0.802605
CDC42EP3	1.6	1.34526	1.90292
CDC42EP5	0.7	0.593062	0.837445
CDC5L	0.78	0.654002	0.925809
CDCA7	0.68	0.578382	0.795755
CDH1	0.71	0.607035	0.819251
CDH13	1.34	1.14662	1.56791
CDH2	1.52	1.31613	1.7535
CDK11B	0.65	0.537971	0.788592
CDK12	0.72	0.612749	0.855023
CDK18	0.8	0.667602	0.952063
CDK2	0.75	0.629532	0.886529
CDK4	0.8	0.665048	0.950661
CDK5	0.69	0.586177	0.817386
CDK6	0.78	0.650705	0.939505
CDK7	0.77	0.660459	0.898213
CDKL2	1.52	1.32252	1.74351
CDKN1C	1.51	1.28407	1.77318
CDKN2AIP	0.73	0.621375	0.85352
CDON	1.43	1.25071	1.6323
CDS1	0.72	0.615081	0.836455
CDX1	0.74	0.608495	0.8895
CDX2	0.8	0.662187	0.965899
CEACAM1	0.76	0.638566	0.899825
CEACAM6	0.79	0.666921	0.94756
CEBPA	0.73	0.602628	0.889934
CEBPD	1.41	1.20061	1.66194
CEBPG	0.68	0.583363	0.803346
CEBPZ	0.8	0.67469	0.940695
CELSR1	1.21	1.01549	1.44224
CELSR3	0.67	0.567869	0.801988
CENPF	0.74	0.624451	0.867523
CENPI	0.77	0.653179	0.911294
CENPK	0.71	0.611023	0.828482
CENPU	0.69	0.593242	0.80219
CEP290	1.29	1.07365	1.55282
CEP63	1.2	1.00596	1.44019
CERS2	0.81	0.673318	0.984864
CERS4	1.47	1.2482	1.72413
CERS5	1.54	1.31186	1.79902
CERS6	0.65	0.559546	0.762022
CFL1	0.7	0.593483	0.818811
CGGBP1	1.28	1.05688	1.54185
CHAF1A	0.69	0.586501	0.814293
CHAF1B	0.68	0.576577	0.795137
CHAMP1	0.72	0.602995	0.857335
CHD1	0.82	0.691403	0.983121
CHD3	1.48	1.27159	1.72964
CHD6	1.52	1.29162	1.78162
CHD7	0.71	0.58907	0.844254
CHD9	1.33	1.10948	1.58701
CHEK1	0.77	0.651821	0.910122
CHEK2	0.68	0.578534	0.798808
CHL1	1.44	1.19365	1.73565
CHMP1A	0.73	0.603173	0.873644
CHN1	1.37	1.17926	1.60136
CHP1	0.71	0.601672	0.828306
CHRDL1	1.5	1.30224	1.72541
CHRNA1	0.77	0.652992	0.898021
CHRNA3	1.44	1.26368	1.62956
CHST11	1.28	1.07229	1.5181
CHUK	0.73	0.627495	0.856666
CIAO1	0.75	0.62312	0.892733
CIDEB	0.76	0.628993	0.929841
CISH	0.72	0.611087	0.840512
CIT	0.78	0.648566	0.931787
CITED2	1.37	1.16863	1.61155
CIZ1	1.22	1.02985	1.45383
CKS1B	0.75	0.634935	0.879266
CKS2	0.75	0.637636	0.886502
CLCN6	1.37	1.16994	1.60311
CLDN3	0.78	0.655278	0.937223
CLDN4	0.73	0.61917	0.859439
CLEC1A	1.39	1.17432	1.63825
CLIC1	0.71	0.610003	0.827406
CLIC2	1.31	1.09517	1.5732
CLN3	0.69	0.581216	0.83015
CLP1	0.74	0.625579	0.86584
CLU	1.42	1.20311	1.67193
CNKSR1	0.7	0.60452	0.82045
CNKSR2	1.47	1.28186	1.69022
CNOT1	0.68	0.57598	0.809986
CNOT2	0.69	0.582932	0.811551
CNOT3	0.75	0.623865	0.897644
CNOT6	0.67	0.566754	0.802653
CNOT7	0.76	0.638735	0.897472
CNOT9	0.72	0.609827	0.843466
CNR1	1.52	1.29685	1.77818
CNTLN	1.49	1.28052	1.73544
CNTN1	1.46	1.25991	1.68152
CNTNAP1	1.5	1.28869	1.74998
CNTNAP3	1.39	1.17868	1.64244
CNTNAP4	1.55	1.29124	1.85571
COLEC12	1.37	1.14735	1.63405
COPS5	0.74	0.624492	0.868895
CORO1C	1.41	1.18772	1.6775
CORO2A	0.71	0.601562	0.845724
CPE	1.45	1.25444	1.68175
CREB1	1.35	1.11991	1.63768
CREB3	1.2	1.00343	1.44182
CREB3L1	0.7	0.591851	0.839245
CREB3L2	1.5	1.26344	1.77005
CREB3L4	0.77	0.644182	0.928827
CREB5	1.49	1.269	1.74364
CREBBP	1.33	1.13155	1.55355
CREBL2	1.22	1.0149	1.46765
CREBRF	1.39	1.17184	1.6512
CREM	1.51	1.28338	1.78639
CRTC3	1.48	1.26531	1.73845
CRY2	1.44	1.24848	1.66562
CRYAB	1.52	1.33166	1.74293
CSDE1	1.46	1.28083	1.6705
CSF1	1.31	1.11249	1.55218
CSK	0.73	0.605775	0.879511
CSNK1G1	0.74	0.624633	0.865242
CSNK1G2	0.77	0.640472	0.921077
CSNK2A1	0.79	0.66242	0.951488
CSNK2B	0.83	0.695293	0.997866
CSPG4	1.53	1.30771	1.78086
CSRNP1	1.34	1.12391	1.60004
CSRNP2	1.5	1.25738	1.77759
CSRNP3	1.44	1.20208	1.714
CTBP1	0.73	0.6009	0.885238
CTBP2	0.7	0.582245	0.831471
CTNNAL1	1.23	1.02103	1.48393
CTNNBIP1	0.75	0.615693	0.905566
CTNND1	0.79	0.674613	0.927929
CTNND2	1.46	1.20759	1.75817
CUL3	0.77	0.657823	0.896464
CX3CL1	1.41	1.19319	1.6559
CX3CR1	1.31	1.09876	1.56285
CXCL16	0.7	0.602971	0.81509
CXCL3	0.67	0.565716	0.782489
CXCR4	1.2	1.00848	1.42993
CXXC4	1.4	1.17202	1.66658
CYCS	0.72	0.618179	0.84399
CYP27B1	0.74	0.631559	0.876564
CYSLTR1	1.32	1.10601	1.57316
CYTL1	1.33	1.12543	1.57193
DACT1	1.52	1.28838	1.79927
DAP	0.74	0.627465	0.884342
DAP3	0.79	0.664869	0.950522
DAPK1	1.23	1.02067	1.48468
DAPK3	1.47	1.26569	1.70112
DAXX	0.75	0.631875	0.898861
DBP	1.39	1.17031	1.64068
DCAF6	1.3	1.09474	1.55386
DCBLD2	1.55	1.32733	1.82093
DCLK1	1.52	1.28993	1.79813
DCLK2	1.55	1.34553	1.7844
DDAH1	0.66	0.559503	0.78153
DDAH2	1.45	1.2354	1.69644
DDIT3	0.78	0.652714	0.925009
DDIT4L	1.51	1.29297	1.76547
DDR1	0.76	0.635928	0.897473
DDR2	1.55	1.31955	1.81734
DDX1	0.79	0.676186	0.925354
DDX20	0.82	0.68679	0.973129
DDX5	1.29	1.07385	1.5566
DDX54	0.74	0.617822	0.887624
DDX6	1.22	1.024	1.46375
DEDD	1.3	1.08471	1.54663
DEDD2	0.77	0.64591	0.929424
DEF8	1.45	1.23308	1.69759
DEK	0.79	0.672814	0.935816
DENND4A	1.24	1.02235	1.49972
DEPDC1	0.76	0.639758	0.895125
DEPDC1B	0.72	0.617601	0.837629
DERL1	0.72	0.626313	0.817969
DERL2	0.79	0.666321	0.934299
DERL3	0.81	0.681212	0.971925
DFFB	0.61	0.504355	0.734912
DGKE	1.35	1.14124	1.5957
DGKG	1.43	1.22514	1.66761
DGKH	1.22	1.01853	1.45317
DGKI	1.43	1.2202	1.67361
DGKQ	0.67	0.561371	0.807565
DHCR24	0.74	0.62926	0.863296
DIABLO	0.72	0.604949	0.851098
DIRAS3	1.4	1.19085	1.65439
DISP1	1.3	1.09596	1.55141
DIXDC1	1.48	1.28073	1.70353
DKK1	1.45	1.21277	1.72666
DLC1	1.44	1.21158	1.70381
DLG4	1.43	1.21773	1.68772
DLL1	1.27	1.07092	1.49439
DLX4	0.8	0.666477	0.953615
DLX5	1.6	1.37109	1.87344
DLX6	1.31	1.09225	1.57205
DMAP1	1.23	1.03797	1.45317
DMD	1.53	1.32262	1.76626
DNAJA1	0.75	0.629238	0.884152
DNAJA3	0.72	0.600399	0.862334
DNAJB6	1.55	1.36005	1.77045
DNAJC27	1.42	1.21177	1.67092
DNER	1.52	1.2887	1.80334
DNM2	0.69	0.582551	0.820806
DNMBP	0.74	0.622223	0.873451
DNMT1	0.74	0.627107	0.875542
DOK4	0.74	0.63464	0.871521
DOK5	1.42	1.20428	1.6847
DOT1L	0.68	0.577857	0.804024
DPYSL2	1.44	1.21803	1.70677
DPYSL3	1.55	1.33456	1.80281
DPYSL5	1.44	1.22526	1.68688
DST	1.42	1.21214	1.66109
DTNA	1.54	1.33949	1.77755
DTX1	1.41	1.18154	1.6794
DTX2	0.67	0.562551	0.799993
DTX3	1.64	1.41182	1.8953
DTX4	0.73	0.629413	0.858103
DUOX2	0.82	0.685257	0.978085
DUSP1	1.24	1.03006	1.49107
DUSP10	1.3	1.07854	1.57315
DUSP16	0.74	0.614688	0.884373
DUSP22	1.56	1.32916	1.83603
DUSP4	0.75	0.627299	0.904671
DVL1	0.82	0.680327	0.985617
DYRK2	0.68	0.57415	0.80298
DZIP3	1.39	1.16412	1.65529
E2F2	0.68	0.578139	0.799122
E2F3	0.79	0.666399	0.938409
E2F5	0.7	0.596619	0.827707
E2F7	0.72	0.61348	0.843696
E2F8	0.69	0.595902	0.809307
EAF1	0.71	0.612046	0.828663
EAF2	0.77	0.641851	0.922982
EBF1	1.45	1.23512	1.7131
EBF2	1.5	1.27959	1.75853
EBF3	1.44	1.22344	1.69583
EBP	0.71	0.600019	0.83527
ECT2	0.77	0.651659	0.912816
EDN1	1.24	1.03135	1.49129
EDNRA	1.49	1.26508	1.76454
EDNRB	1.37	1.13962	1.65705
EED	0.75	0.630901	0.881249
EEF1E1	0.83	0.700845	0.98084
EFNA1	0.71	0.599804	0.839202
EFNB3	1.37	1.1664	1.61744
EFS	1.46	1.23844	1.7208
EGR1	1.48	1.2731	1.71846
EGR2	1.43	1.19782	1.71136
EGR3	1.54	1.31028	1.81531
EGR4	0.75	0.633439	0.888213
EHF	0.72	0.629232	0.822489
EID1	1.54	1.33063	1.78734
EID2B	1.41	1.21305	1.65006
EID3	1.52	1.30043	1.77963
EIF4EBP1	0.76	0.635723	0.914472
EIF4EBP2	1.28	1.07912	1.52834
ELF2	1.25	1.04173	1.48869
ELF3	0.71	0.607954	0.823913
ELF4	0.75	0.635419	0.88114
ELK3	1.39	1.17913	1.63893
ELL2	1.47	1.25114	1.73804
ELL3	0.62	0.513721	0.737441
ELMO1	1.35	1.12951	1.61276
ELMSAN1	1.41	1.18786	1.67137
ELN	1.62	1.378	1.9129
ELOC	0.77	0.652182	0.915552
ELOVL4	1.53	1.31739	1.78355
ELP3	0.69	0.586437	0.823362
EML4	0.67	0.569879	0.788027
EMSY	1.32	1.10073	1.59438
ENDOG	0.68	0.567431	0.816825
ENG	1.33	1.13145	1.55596
ENO1	0.75	0.634658	0.891059
ENPP1	1.49	1.23727	1.80588
ENPP2	1.36	1.14239	1.62935
EPAS1	1.32	1.10385	1.58828
EPC1	1.36	1.15713	1.60759
EPC2	1.36	1.12861	1.63497
EPHA1	0.71	0.609804	0.837316
EPHA10	0.64	0.541833	0.752607
EPHA2	0.83	0.691405	0.997574
EPHA3	1.56	1.30456	1.85783
EPHA4	1.54	1.30965	1.81577
EPHA7	1.45	1.26791	1.66671
EPHB2	0.74	0.618999	0.895043
EPHB3	0.66	0.546094	0.791185
EPHB4	0.8	0.667273	0.957477
EPHB6	1.53	1.2782	1.83886
EPS8	0.72	0.622468	0.833517
ERBB2	0.73	0.619297	0.870167
ERBB3	0.71	0.605015	0.82595
ERC1	1.52	1.28826	1.78542
ERG	1.4	1.18948	1.64294
ERN2	0.73	0.618436	0.858826
ERO1A	0.73	0.620641	0.864188
ERRFI1	1.31	1.09923	1.56485
ESR1	1.32	1.10424	1.56712
ESRRA	0.69	0.579317	0.832148
ETS2	0.78	0.640491	0.942054
ETV1	1.57	1.32778	1.8682
ETV2	0.74	0.626144	0.884953
ETV3	0.83	0.692447	0.994862
EVL	1.29	1.08325	1.52685
EWSR1	0.7	0.583071	0.839271
EYA1	1.53	1.29996	1.80619
EYA2	1.23	1.04253	1.45989
EYA3	0.69	0.583798	0.822555
EYA4	1.54	1.30493	1.81266
EZH1	1.43	1.24199	1.65046
EZH2	0.72	0.606082	0.86647
F2R	1.38	1.1486	1.65778
F2RL1	0.72	0.617205	0.84343
F2RL2	1.35	1.12528	1.62051
FABP4	1.49	1.28944	1.72689
FADD	0.75	0.625537	0.893136
FADS1	1.54	1.30732	1.81604
FAM126A	1.31	1.09435	1.56491
FAM13B	1.38	1.16295	1.63514
FANCA	0.68	0.579787	0.802479
FANCC	0.73	0.612094	0.86549
FANCD2	0.7	0.591887	0.816779
FANCE	0.73	0.610757	0.876841
FANCF	0.73	0.610705	0.876807
FANCG	0.71	0.600054	0.838035
FARP2	0.74	0.623771	0.877711
FASTK	0.77	0.644195	0.931543
FAT1	0.72	0.606578	0.863007
FBXO6	0.68	0.577119	0.809743
FBXO8	1.27	1.0672	1.51924
FBXW11	1.39	1.15599	1.67776
FBXW7	1.2	1.00924	1.42667
FCER1A	1.36	1.15059	1.61674
FCGR2C	1.3	1.08367	1.56189
FEN1	0.75	0.628084	0.892398
FER	1.45	1.22026	1.72651
FEZ2	1.35	1.11988	1.62042
FGD1	1.53	1.32274	1.77678
FGD3	1.2	1.0059	1.42265
FGD5	1.25	1.05359	1.48182
FGD6	1.35	1.11879	1.61728
FGF1	1.55	1.31649	1.83469
FGF10	1.52	1.29988	1.77327
FGF12	1.58	1.35207	1.85752
FGF13	1.59	1.36031	1.86791
FGF14	1.58	1.34982	1.84682
FGF18	1.45	1.24188	1.69217
FGF2	1.47	1.26554	1.71856
FGF4	0.7	0.581642	0.847423
FGF7	1.48	1.25268	1.75047
FGF9	1.5	1.25016	1.80418
FGFBP1	0.73	0.603623	0.883182
FGFR1	1.58	1.36462	1.82715
FGFR1OP	0.7	0.584999	0.828806
FGFR4	0.79	0.665176	0.943777
FH	0.72	0.610497	0.842201
FHL5	1.52	1.28326	1.7975
FLNA	1.53	1.32176	1.76376
FLNB	0.71	0.605421	0.837664
FLRT2	1.47	1.25289	1.73323
FLRT3	0.78	0.652205	0.938179
FLT1	1.21	1.02414	1.4288
FLT3LG	1.21	1.00448	1.46766
FMN2	1.47	1.28993	1.67847
FNBP1	1.49	1.27382	1.74856
FOSB	1.27	1.0657	1.51548
FOSL1	0.79	0.662768	0.94936
FOXA1	0.72	0.621847	0.843166
FOXA2	0.71	0.59515	0.836628
FOXA3	0.76	0.640321	0.898895
FOXC2	1.56	1.33115	1.81757
FOXD1	0.77	0.639082	0.926438
FOXD2	0.69	0.586643	0.806332
FOXF1	1.51	1.29973	1.75355
FOXF2	1.52	1.27891	1.80322
FOXH1	0.73	0.608348	0.874649
FOXJ1	0.79	0.655486	0.951139
FOXJ2	1.44	1.22896	1.67796
FOXK2	0.82	0.68162	0.980285
FOXM1	0.72	0.614046	0.845536
FOXN2	0.73	0.62159	0.867332
FOXN3	1.41	1.20571	1.65426
FOXO1	1.42	1.18737	1.70662
FOXP1	1.4	1.20366	1.63652
FOXP2	1.52	1.33158	1.73284
FOXQ1	0.82	0.685991	0.978144
FOXS1	1.41	1.1878	1.67747
FRAT2	0.67	0.560223	0.792631
FRS2	1.3	1.06605	1.57761
FRY	1.55	1.32006	1.814
FST	1.49	1.25909	1.77296
FSTL1	1.5	1.26836	1.78276
FSTL3	1.43	1.20635	1.68553
FUBP1	0.69	0.590078	0.807681
FUT8	0.7	0.601965	0.80508
FYN	1.51	1.28453	1.777
FZD1	1.45	1.23775	1.70227
FZD10	1.46	1.22066	1.7487
FZD2	1.34	1.13998	1.56368
FZD4	1.58	1.33843	1.87474
FZD5	0.75	0.630211	0.887461
FZD8	1.53	1.30666	1.79974
G3BP1	0.75	0.632359	0.88405
GAB1	1.38	1.15456	1.65161
GABPB1	0.77	0.649834	0.916597
GABRE	1.47	1.22688	1.76092
GABRG2	1.53	1.29014	1.81353
GADD45B	1.5	1.28587	1.74763
GADD45G	1.37	1.16323	1.60558
GAP43	1.45	1.24419	1.681
GARNL3	1.3	1.11087	1.53239
GAS1	1.51	1.28709	1.76382
GAS7	1.43	1.2062	1.69543
GATA2	1.36	1.15	1.61055
GATA3	1.2	1.01283	1.41313
GATA4	0.76	0.643984	0.896167
GATA6	0.76	0.637833	0.906212
GATAD2A	0.69	0.5896	0.817941
GATAD2B	1.42	1.2109	1.66631
GDI2	0.69	0.587383	0.812606
GDNF	1.58	1.31944	1.88235
GEM	1.51	1.29873	1.74796
GFI1	0.82	0.677477	0.988873
GFI1B	1.2	1.00301	1.43831
GFRA1	1.38	1.16931	1.63916
GFRA3	1.49	1.27075	1.75841
GGCT	0.73	0.61402	0.865206
GHR	1.49	1.26408	1.74945
GID4	1.46	1.27632	1.67332
GIPC1	0.81	0.670756	0.966821
GIT2	1.29	1.07914	1.5512
GJA1	1.52	1.31371	1.76783
GKAP1	1.45	1.2611	1.67869
GLI1	1.42	1.18935	1.70114
GLI2	1.53	1.30431	1.79651
GLI3	1.53	1.30951	1.79717
GLIS1	1.53	1.28458	1.8152
GLIS3	1.48	1.23502	1.76425
GLRB	1.6	1.37886	1.85105
GLRX2	0.76	0.648913	0.888398
GMCL1	0.68	0.575507	0.800823
GMEB1	0.68	0.570976	0.800534
GMIP	0.7	0.584445	0.826832
GMNN	0.72	0.61179	0.841103
GMPS	0.77	0.646815	0.908941
GNA11	0.73	0.608398	0.879309
GNA14	1.3	1.07205	1.57032
GNAI1	1.62	1.38265	1.8929
GNAI2	1.44	1.2241	1.691
GNAL	1.61	1.39065	1.85776
GNAO1	1.56	1.35235	1.79275
GNAQ	1.21	1.01136	1.45196
GNAZ	1.41	1.21791	1.63863
GNB1L	0.83	0.689071	0.997662
GNB2	0.76	0.628499	0.926078
GNB4	1.47	1.23274	1.75811
GNB5	1.61	1.3785	1.87759
GNG11	1.45	1.22497	1.71114
GNG12	1.26	1.05279	1.51798
GNG2	1.28	1.07119	1.52759
GNG7	1.37	1.16813	1.61312
GON4L	1.22	1.03162	1.43243
GP1BB	1.46	1.26326	1.68901
GPBAR1	1.41	1.17826	1.69752
GPC3	1.48	1.23562	1.77457
GPHN	0.62	0.526034	0.727492
GPR146	1.46	1.24784	1.71074
GPR153	1.49	1.26686	1.7494
GPR155	1.38	1.18402	1.61068
GPR160	0.75	0.628205	0.894358
GPR176	1.29	1.09726	1.51211
GPR19	0.82	0.681527	0.984326
GPR27	1.43	1.21127	1.69073
GPR35	0.71	0.601658	0.833875
GPR39	0.71	0.602969	0.825795
GPR4	1.26	1.07586	1.48576
GPR68	1.32	1.1169	1.55503
GPR85	1.24	1.03465	1.48065
GPRC5A	0.73	0.626608	0.847871
GPRC5D	0.78	0.650822	0.924346
GPSM2	0.75	0.631737	0.899605
GRB7	0.78	0.658021	0.931685
GREM1	1.44	1.2151	1.71034
GREM2	1.45	1.2192	1.71408
GRHL1	0.8	0.671477	0.962535
GRHL2	0.7	0.603374	0.820989
GRIN2A	1.44	1.26534	1.64333
GRIN2C	1.25	1.05376	1.47553
GRIN2D	0.73	0.612552	0.860977
GRIP1	1.56	1.33602	1.82667
GRK4	1.46	1.27171	1.6858
GRK6	0.76	0.622763	0.917324
GRTP1	0.67	0.564277	0.794586
GSN	1.36	1.14503	1.62122
GSPT1	0.8	0.668593	0.947224
GTF2A2	0.71	0.600513	0.845624
GTF2E2	0.69	0.589681	0.80178
GTF2H3	0.76	0.645543	0.906377
GTF2H4	0.83	0.68347	0.997131
GTF2IRD2	1.4	1.20182	1.64134
GTSE1	0.74	0.627263	0.877879
GUCA1B	1.33	1.11816	1.57144
GUCY1A1	1.49	1.25424	1.77608
GUCY1A2	1.46	1.2404	1.70905
GUCY1B1	1.56	1.32053	1.84167
GUCY2C	0.78	0.640349	0.941539
GZMA	0.78	0.641854	0.940663
H1.2	0.81	0.678889	0.970876
H2AC11	0.73	0.600816	0.874893
H2AC16	0.79	0.656364	0.950793
H2AC17	0.75	0.625256	0.894665
H2AX	0.75	0.629236	0.891406
H2BC12	0.77	0.633551	0.924607
H2BC4	0.78	0.652888	0.943708
H3C2	0.75	0.620144	0.911094
H4C1	0.72	0.603499	0.864879
H4C13	0.67	0.557149	0.815674
H4C14	1.25	1.03634	1.49814
H4C2	0.8	0.659918	0.976437
H4C3	0.79	0.658137	0.959751
H4C4	0.75	0.623887	0.896969
H4C5	0.8	0.659392	0.977325
HABP4	1.49	1.28482	1.73382
HACD3	0.67	0.578013	0.773246
HAND1	1.44	1.20772	1.72113
HASPIN	0.72	0.611724	0.858554
HAT1	0.76	0.643373	0.890901
HBP1	1.3	1.07787	1.56598
HCFC2	1.42	1.19655	1.68405
HDAC1	0.65	0.557696	0.751015
HDAC2	0.81	0.681595	0.974216
HDAC4	1.49	1.29036	1.71693
HDAC5	1.53	1.30471	1.79461
HDAC7	1.3	1.12119	1.5047
HDAC9	1.43	1.20542	1.70543
HDGF	0.75	0.626204	0.886968
HELLS	0.72	0.616065	0.848281
HELZ	1.21	1.0117	1.44486
HELZ2	0.78	0.645058	0.933311
HES1	0.79	0.656602	0.940163
HES2	0.82	0.69455	0.979389
HES6	0.72	0.601858	0.849926
HEXIM1	1.45	1.24242	1.68103
HEY1	1.55	1.32339	1.81441
HEY2	1.51	1.2901	1.77169
HEYL	1.58	1.34091	1.85921
HGF	1.35	1.12996	1.61805
HGS	0.82	0.681028	0.993802
HHEX	1.43	1.20529	1.70471
HHIP	1.27	1.06466	1.52514
HIC1	1.39	1.18777	1.62659
HIF3A	1.52	1.33178	1.73065
HINFP	0.82	0.681867	0.990158
HIPK3	1.31	1.0863	1.56929
HIRA	0.71	0.595707	0.856804
HIVEP1	1.27	1.04822	1.53964
HIVEP2	1.42	1.19318	1.68185
HLF	1.46	1.28424	1.66986
HLX	1.29	1.11307	1.50609
HMGA1	0.7	0.592443	0.828977
HMGB1	0.72	0.608644	0.850534
HMGB2	0.76	0.641388	0.90765
HMGCR	0.71	0.609034	0.827399
HMGN1	0.65	0.554273	0.772718
HNF1A	0.7	0.592706	0.830385
HNF1B	0.74	0.629944	0.858627
HNF4A	0.69	0.583653	0.827491
HNF4G	0.66	0.570385	0.770782
HNRNPAB	0.65	0.540988	0.775377
HNRNPD	0.76	0.631997	0.90583
HOPX	1.62	1.36341	1.92599
HOXA10	0.75	0.63325	0.892837
HOXA11	0.69	0.587488	0.820315
HOXA13	0.66	0.555972	0.775383
HOXA2	1.51	1.31307	1.7435
HOXA3	1.54	1.33347	1.78095
HOXA4	1.51	1.32471	1.71156
HOXA5	1.44	1.25538	1.66279
HOXA9	0.72	0.608003	0.856103
HOXB13	0.72	0.602695	0.870572
HOXB2	1.38	1.14975	1.65028
HOXB4	1.52	1.29032	1.78378
HOXB7	0.73	0.61169	0.862198
HOXB9	0.81	0.68026	0.958622
HOXC4	1.3	1.11246	1.50862
HOXC5	1.56	1.31757	1.84951
HOXD1	1.43	1.199	1.70611
HOXD4	1.21	1.01837	1.44401
HOXD8	1.39	1.18817	1.62062
HPGDS	1.34	1.12083	1.59209
HR	0.73	0.608683	0.870508
HSBP1	0.75	0.643702	0.876844
HSF2	1.37	1.16034	1.61365
HSP90AA1	0.74	0.621694	0.869404
HSP90AB1	0.77	0.64719	0.915654
HSPA5	0.7	0.605972	0.802187
HSPB1	1.52	1.29844	1.78584
HSPD1	0.7	0.599206	0.813835
HTATIP2	0.72	0.61592	0.834214
HTATSF1	0.74	0.622039	0.880015
HTR2A	1.44	1.20695	1.7171
HTR2B	1.39	1.16628	1.65624
HTR3A	1.33	1.11504	1.57623
HTT	0.73	0.609213	0.863657
HUNK	1.48	1.21688	1.7914
HUS1	0.76	0.633349	0.907666
ID1	0.75	0.627951	0.896748
ID2	1.4	1.20431	1.6299
ID3	1.51	1.26671	1.80491
ID4	1.57	1.35997	1.81764
IDE	0.73	0.618661	0.851236
IDH1	0.69	0.599778	0.797013
IDH2	0.69	0.573591	0.835417
IFI27	0.71	0.599856	0.839956
IFNG	0.77	0.630001	0.934264
IFNGR2	0.71	0.609135	0.819378
IFT52	1.24	1.03632	1.49081
IFT88	0.78	0.639885	0.94852
IGF1	1.52	1.28943	1.79375
IGF1R	1.39	1.16134	1.66098
IGF2	1.56	1.33266	1.81528
IGFBP6	1.52	1.30838	1.77504
IGHMBP2	1.33	1.12223	1.57467
IGSF1	1.58	1.36845	1.82327
IHH	0.8	0.673062	0.961751
IKBKE	0.71	0.61583	0.828486
IKZF4	1.53	1.30601	1.79448
IL11RA	1.38	1.18602	1.60097
IL12RB1	0.78	0.642054	0.95347
IL17C	0.69	0.576009	0.818823
IL17RD	1.59	1.37951	1.834
IL1R1	1.46	1.21857	1.75632
IL22RA1	0.75	0.619938	0.896803
IL2RG	0.74	0.628629	0.872491
IL3RA	1.23	1.04658	1.45589
IL5RA	1.41	1.17319	1.68755
IL6R	1.29	1.08357	1.54131
IL6ST	1.43	1.19901	1.70057
ILF2	0.73	0.618617	0.854142
ILF3	0.83	0.688972	0.991203
ILK	1.57	1.32855	1.84717
IMPA1	0.66	0.564791	0.778439
ING4	1.41	1.1842	1.6786
INPP4A	1.49	1.26569	1.74781
INPP4B	1.43	1.18753	1.71471
INPP5B	1.39	1.18325	1.63469
INSIG1	0.73	0.610414	0.864021
INSR	1.25	1.0412	1.49597
IQGAP3	0.7	0.59789	0.825373
IQSEC1	1.47	1.25321	1.72715
IRAK1	0.72	0.611728	0.852079
IRAK2	0.71	0.608434	0.839012
IRAK3	1.31	1.09346	1.5691
IRF2	0.83	0.691376	0.98887
IRF3	0.71	0.594235	0.843437
IRF6	0.71	0.6083	0.830579
IRS1	1.58	1.33972	1.86029
IRS2	1.4	1.1774	1.66247
IRX2	0.71	0.597223	0.850854
IRX5	0.83	0.685324	0.994057
ISL1	1.49	1.28128	1.73732
ISL2	1.55	1.34675	1.78447
ITGA1	1.58	1.34966	1.85395
ITGA10	1.5	1.26977	1.7659
ITGA2	0.77	0.649811	0.912609
ITGA5	1.49	1.26596	1.7517
ITGA6	0.69	0.590172	0.80405
ITGA7	1.5	1.29843	1.72248
ITGA8	1.63	1.3756	1.91988
ITGA9	1.51	1.29607	1.76866
ITGAV	1.3	1.07365	1.56749
ITGB1	1.51	1.27325	1.7995
ITGB1BP2	1.48	1.29225	1.68773
ITGB3	1.47	1.24693	1.73866
ITGB3BP	0.78	0.660287	0.917749
ITGB4	0.72	0.605329	0.857237
ITGB6	0.82	0.703995	0.96319
ITGB7	0.82	0.688305	0.981302
ITGBL1	1.48	1.25521	1.75085
ITPK1	0.65	0.545388	0.782821
ITPKA	0.73	0.609818	0.87008
ITPKB	1.38	1.18266	1.61946
ITPR1	1.37	1.15945	1.62941
ITPR2	1.28	1.0643	1.53629
ITPR3	0.68	0.582855	0.792508
ITSN1	1.5	1.2822	1.75447
ITSN2	1.27	1.05588	1.52912
JADE1	1.42	1.21813	1.66062
JAK1	1.21	1.01961	1.44673
JAK2	0.72	0.598214	0.860648
JAZF1	1.51	1.27166	1.79021
JDP2	1.3	1.09051	1.54588
JMJD1C	1.25	1.03888	1.50982
JMY	1.51	1.30626	1.74151
JUP	0.71	0.602507	0.828469
KAT2A	0.76	0.639975	0.913867
KAT2B	1.22	1.02738	1.45974
KAT6B	1.35	1.15246	1.59308
KCNH2	1.57	1.36068	1.80293
KDM1A	0.77	0.646107	0.917842
KDM4A	0.75	0.628374	0.884233
KDM4C	0.68	0.581024	0.800415
KDM5A	1.26	1.04883	1.50971
KDR	1.29	1.10058	1.51134
KEAP1	0.78	0.647579	0.947674
KEL	1.3	1.09957	1.54327
KHDRBS1	0.76	0.633731	0.910064
KHDRBS3	1.52	1.29966	1.76828
KHSRP	0.8	0.662388	0.955069
KIDINS220	1.45	1.23825	1.6901
KIF26A	1.24	1.04675	1.47703
KIFAP3	1.62	1.36962	1.91395
KISS1R	0.76	0.626484	0.91228
KIT	1.38	1.17446	1.62805
KITLG	1.28	1.06246	1.54576
KL	1.54	1.28722	1.83292
KLF10	1.51	1.30117	1.74129
KLF11	1.48	1.26485	1.72079
KLF12	1.43	1.20299	1.70136
KLF15	1.44	1.24162	1.67557
KLF3	0.72	0.613477	0.840118
KLF5	0.68	0.580788	0.792722
KLF7	1.45	1.22358	1.71101
KLF8	1.51	1.28904	1.77428
KLF9	1.49	1.25681	1.76595
KLHL12	0.79	0.663341	0.929622
KLRC2	0.78	0.642804	0.945297
KLRD1	0.83	0.686158	0.996308
KMT5A	0.77	0.639918	0.920865
KMT5B	0.83	0.69884	0.987753
KRAS	0.72	0.613181	0.841922
KREMEN2	0.76	0.641275	0.906131
KSR1	1.36	1.16317	1.5881
L3MBTL3	1.57	1.32842	1.85447
L3MBTL4	1.34	1.12561	1.60375
LANCL2	0.67	0.578168	0.785535
LASP1	0.7	0.59599	0.824357
LATS2	1.56	1.32032	1.84785
LBH	1.51	1.27821	1.77443
LCORL	0.66	0.572516	0.768462
LDB2	1.49	1.26267	1.76363
LDLRAP1	0.81	0.668876	0.971764
LEF1	1.32	1.11492	1.57166
LEMD3	0.79	0.65865	0.9438
LEO1	0.73	0.624912	0.85235
LEPR	1.41	1.18882	1.66638
LGALS1	1.51	1.29116	1.77129
LGALS3BP	0.72	0.602263	0.849616
LGR4	0.71	0.611432	0.829465
LGR5	0.81	0.669791	0.977303
LHX1	0.78	0.646839	0.947285
LHX6	1.47	1.24443	1.74456
LIF	0.76	0.642691	0.894006
LIFR	1.34	1.12745	1.58618
LIN54	0.72	0.61089	0.856157
LITAF	1.24	1.04078	1.48033
LMCD1	1.52	1.29924	1.78247
LMO1	1.46	1.28164	1.66288
LMO2	1.36	1.14322	1.60725
LMO3	1.56	1.34854	1.80937
LPAR1	1.46	1.21776	1.74066
LPAR2	0.7	0.585348	0.827783
LPAR5	0.69	0.585254	0.817688
LPAR6	1.28	1.06427	1.53293
LPIN2	0.68	0.585251	0.795684
LPP	1.44	1.24309	1.67143
LRP1	1.38	1.16764	1.63658
LRP12	1.6	1.35011	1.90452
LRPPRC	0.72	0.610402	0.8507
LRRK2	1.43	1.19295	1.70266
LRRN3	1.52	1.28132	1.80042
LSP1	1.22	1.02927	1.4573
LTBR	0.73	0.609148	0.872006
LY96	1.29	1.0749	1.54483
LYL1	1.32	1.12233	1.5439
LZTS1	1.5	1.26923	1.76944
MACC1	0.69	0.592668	0.806501
MAF	1.36	1.13796	1.62612
MAFG	1.27	1.07556	1.51142
MAGED1	1.57	1.27891	1.91521
MAGI2	1.54	1.34126	1.7671
MAK	1.39	1.16898	1.64147
MALT1	1.24	1.02631	1.50145
MAML2	1.45	1.21757	1.72448
MAMLD1	1.56	1.32663	1.83354
MAP2K3	0.77	0.642944	0.918675
MAP2K5	1.28	1.07522	1.52563
MAP2K6	0.78	0.635627	0.949965
MAP3K11	0.74	0.617242	0.895821
MAP3K12	1.51	1.27903	1.7732
MAP3K13	0.7	0.585538	0.831582
MAP3K14	1.3	1.10236	1.52841
MAP3K21	0.7	0.599478	0.819451
MAP3K3	1.49	1.27956	1.73855
MAP3K4	1.29	1.0786	1.53497
MAP3K9	0.75	0.626895	0.893129
MAP4K5	1.34	1.10615	1.61786
MAPK10	1.48	1.26932	1.72874
MAPK11	1.4	1.21077	1.62632
MAPK13	0.7	0.595379	0.821645
MAPK3	0.82	0.686175	0.990778
MAPK6	0.71	0.612051	0.82587
MAPKAPK3	0.68	0.568165	0.812369
MAPKAPK5	0.69	0.585262	0.805777
MAPRE2	1.32	1.10689	1.58444
MARK2	0.71	0.601007	0.843183
MAX	0.76	0.635487	0.901779
MAZ	0.82	0.682562	0.98584
MCC	1.49	1.25702	1.75662
MCM2	0.72	0.606913	0.843932
MCM3	0.74	0.621712	0.873049
MCM4	0.73	0.621355	0.860557
MCM5	0.73	0.613267	0.867683
MCM6	0.74	0.627275	0.867194
MCM7	0.72	0.607569	0.860459
MCTP1	1.27	1.06202	1.52795
MCTP2	0.63	0.535232	0.744034
MCTS1	0.78	0.665891	0.912654
MDFIC	1.4	1.16365	1.67381
MEAF6	1.28	1.07805	1.50883
MECP2	1.43	1.23439	1.66682
MED10	0.73	0.610813	0.868273
MED11	0.77	0.642383	0.927547
MED13	0.74	0.629336	0.866005
MED13L	1.44	1.22316	1.68996
MED14	0.65	0.550423	0.774011
MED18	0.68	0.570108	0.818209
MED19	0.74	0.621942	0.886763
MED23	0.73	0.616288	0.869972
MED24	0.75	0.626478	0.907639
MED8	0.7	0.598515	0.82919
MEF2A	1.45	1.2225	1.72107
MEF2C	1.46	1.22848	1.73304
MEF2D	1.39	1.18416	1.6202
MEIS1	1.46	1.25154	1.69943
MEIS2	1.4	1.18721	1.65591
MEIS3P1	1.62	1.36186	1.91671
MEN1	0.79	0.656063	0.943511
MEOX1	1.35	1.13535	1.60804
MEOX2	1.48	1.26205	1.73189
MERTK	1.38	1.14046	1.67057
MESD	0.73	0.622692	0.849776
MET	0.8	0.671545	0.951525
MGST2	0.76	0.643825	0.903467
MIB2	0.82	0.678775	0.988734
MIF	0.81	0.677581	0.971397
MINK1	0.68	0.56601	0.805966
MITF	1.35	1.12249	1.62893
MKI67	0.73	0.615902	0.856754
MKX	1.57	1.35248	1.82024
MLF1	1.62	1.38169	1.90464
MLH1	1.65	1.34128	2.02055
MLST8	0.76	0.632531	0.911508
MLX	0.68	0.577629	0.793796
MLXIP	1.38	1.1671	1.62373
MLXIPL	0.77	0.626989	0.933861
MN1	1.56	1.34437	1.81584
MNX1	0.68	0.572591	0.808999
MOAP1	1.44	1.25122	1.64734
MOK	0.79	0.660502	0.94781
MORC4	0.76	0.631795	0.905366
MORF4L1	1.56	1.35436	1.79295
MOV10	0.7	0.593152	0.822893
MPL	1.4	1.21184	1.60932
MPP1	1.23	1.02555	1.46365
MPP2	1.43	1.24586	1.63676
MPP7	1.34	1.13222	1.59506
MPZL1	1.26	1.05018	1.51115
MRAS	1.55	1.30233	1.839
MRGPRF	1.52	1.31262	1.76491
MRPL28	0.78	0.646413	0.945001
MRRF	0.67	0.570308	0.77648
MRTFA	1.32	1.12794	1.54194
MRTFB	1.28	1.07304	1.52011
MS4A14	1.22	1.01179	1.46992
MS4A2	1.21	1.01291	1.44737
MSC	1.31	1.1189	1.54351
MSH2	0.78	0.650548	0.929554
MSI2	0.82	0.683926	0.990393
MSN	1.33	1.11897	1.58414
MSRB2	1.45	1.24001	1.68952
MST1R	0.72	0.616102	0.837391
MSX2	0.76	0.634262	0.900215
MTA2	0.7	0.589015	0.83319
MTDH	0.74	0.628668	0.864551
MTERF2	1.31	1.105	1.56054
MTF2	0.71	0.600919	0.833702
MTOR	0.82	0.685161	0.991344
MTSS1	1.54	1.29301	1.83039
MUC1	0.71	0.605699	0.829753
MUTYH	0.79	0.656003	0.957624
MXD1	0.72	0.607591	0.844891
MXD4	1.3	1.09826	1.53226
MYB	0.64	0.54833	0.751615
MYBBP1A	0.78	0.650456	0.932558
MYBL1	1.37	1.1817	1.59909
MYBL2	0.73	0.618996	0.860369
MYC	0.8	0.670943	0.96409
MYCBP	0.68	0.584745	0.779359
MYCBP2	1.24	1.0325	1.49826
MYD88	0.76	0.647809	0.883375
MYH11	1.47	1.29433	1.66838
MYO10	0.79	0.661709	0.931699
MYO18A	0.82	0.677782	0.99228
MYO1E	0.71	0.600526	0.837193
MYO6	0.7	0.601409	0.819611
MYO9A	1.48	1.26911	1.73092
MYO9B	1.23	1.04698	1.43641
MYOCD	1.5	1.31147	1.7197
NAA15	0.78	0.658955	0.925883
NACC2	1.5	1.3085	1.71428
NAT14	1.51	1.29318	1.76834
NBN	0.76	0.63849	0.908815
NCAM1	1.46	1.25562	1.70733
NCLN	0.67	0.572838	0.79481
NCOA1	1.35	1.14613	1.59038
NCOA7	0.67	0.588222	0.765404
NCS1	1.5	1.32061	1.71019
NCSTN	0.75	0.636349	0.895221
NDC80	0.73	0.619041	0.872575
NDFIP2	0.7	0.599228	0.810609
NDN	1.57	1.35876	1.81861
NDP	1.59	1.31203	1.92886
NDRG1	0.67	0.562283	0.787308
NDRG2	1.2	1.00199	1.42573
NDST1	1.37	1.17364	1.60198
NECTIN2	0.69	0.588887	0.814941
NEDD4	1.52	1.29269	1.78883
NEK4	0.74	0.63285	0.87581
NEK6	0.74	0.622385	0.890041
NELFA	0.72	0.602294	0.860028
NELFB	0.81	0.675689	0.976425
NELFCD	0.73	0.611776	0.871959
NET1	0.76	0.643259	0.891833
NF2	0.82	0.680694	0.991599
NFAT5	1.38	1.15383	1.65006
NFATC1	1.3	1.09547	1.5507
NFATC2	1.25	1.04958	1.494
NFATC4	1.58	1.36603	1.83682
NFE2L1	1.39	1.18115	1.62687
NFE2L3	0.72	0.610076	0.840553
NFIA	1.41	1.21137	1.63515
NFIB	1.33	1.11285	1.59338
NFIC	1.49	1.29298	1.71246
NFIL3	1.38	1.16002	1.63019
NFIX	1.45	1.25091	1.67702
NFKBIA	1.25	1.03688	1.50945
NFKBIZ	0.67	0.556279	0.802921
NFRKB	0.76	0.629392	0.917875
NFXL1	0.72	0.612573	0.857503
NFYA	0.75	0.629417	0.890525
NFYB	1.24	1.03536	1.49291
NFYC	0.82	0.677809	0.994211
NGEF	0.74	0.615874	0.881658
NIF3L1	0.69	0.58539	0.815306
NIN	1.45	1.23278	1.70754
NISCH	1.45	1.25023	1.68742
NKIRAS1	1.46	1.26068	1.69112
NKRF	0.8	0.671816	0.956516
NKX3.1	1.25	1.04956	1.49082
NKX3.2	1.25	1.03403	1.50533
NKX6.3	0.62	0.530593	0.727433
NLE1	0.82	0.685085	0.985419
NLGN1	1.52	1.32369	1.73546
NLRP1	1.25	1.04194	1.5038
NME1.NME2	0.79	0.661468	0.933877
NMI	0.67	0.559537	0.79289
NMRAL1	0.75	0.624851	0.909417
NOC2L	0.77	0.642689	0.921947
NOCT	0.81	0.675534	0.972339
NOD1	1.39	1.17339	1.64248
NOLC1	0.77	0.645581	0.911759
NONO	0.82	0.680504	0.979604
NOTCH2	1.51	1.28074	1.77924
NOTCH2NLA	1.51	1.28723	1.77321
NOTCH4	1.34	1.15644	1.55459
NOX1	0.76	0.629782	0.915257
NPAS2	0.74	0.625937	0.866565
NPHP1	1.67	1.41534	1.96655
NPR1	1.5	1.27634	1.76853
NPR2	1.52	1.31124	1.75568
NPR3	1.54	1.32697	1.78951
NPY1R	1.46	1.24597	1.70131
NR1D2	1.36	1.13183	1.62357
NR1H2	1.45	1.22267	1.72499
NR1I2	0.78	0.64767	0.942373
NR2C2	1.31	1.09415	1.5763
NR2F1	1.56	1.3296	1.83716
NR2F2	1.47	1.2747	1.70479
NR2F6	0.73	0.613168	0.878136
NR3C1	1.4	1.18092	1.65916
NR4A1	1.28	1.07446	1.5329
NR4A3	1.4	1.17559	1.67076
NR6A1	0.79	0.64865	0.954789
NRAS	0.7	0.602911	0.81436
NRK	1.47	1.24339	1.74067
NRXN1	1.5	1.3025	1.71945
NSD2	0.74	0.615455	0.880598
NSG2	1.32	1.1503	1.52016
NSMCE3	1.46	1.26503	1.6835
NTF3	1.27	1.06779	1.51316
NTRK2	1.55	1.32861	1.80667
NUDT4	1.38	1.14883	1.65468
NUFIP1	0.8	0.665267	0.965355
NUP62	0.78	0.658163	0.932162
NUP93	0.79	0.659526	0.949775
NUP98	0.72	0.609548	0.856445
NXN	1.58	1.36274	1.83907
OCRL	1.44	1.23326	1.66979
OMD	1.5	1.28337	1.74938
OPHN1	1.32	1.09984	1.57428
OR2A7	0.69	0.588929	0.806662
OR51E1	1.3	1.09918	1.53981
ORC2	0.76	0.641667	0.90811
OVOL1	0.7	0.591724	0.837589
OVOL2	0.73	0.619194	0.849439
OXSR1	0.71	0.598692	0.848088
P2RX4	0.81	0.674511	0.961685
P2RY12	1.22	1.02667	1.45118
P2RY14	1.45	1.24025	1.68513
PA2G4	0.76	0.634534	0.906817
PAFAH1B2	0.81	0.687927	0.956812
PAG1	0.79	0.667245	0.945349
PAK1	0.74	0.624356	0.874469
PAK1IP1	0.83	0.699742	0.984888
PAK3	1.49	1.24702	1.77517
PAK4	0.77	0.647393	0.920845
PAK6	0.7	0.589414	0.830131
PALB2	0.73	0.614163	0.863644
PAQR8	0.75	0.630821	0.898278
PARP1	0.7	0.582031	0.842682
PASK	0.67	0.562759	0.794144
PATJ	0.75	0.630984	0.887512
PAWR	0.71	0.602693	0.848172
PAX6	1.21	1.0187	1.4487
PAX8	0.82	0.680947	0.991943
PBX1	1.46	1.24065	1.71422
PBX3	1.54	1.34349	1.77284
PBXIP1	1.4	1.19249	1.63619
PC	0.82	0.682959	0.992514
PCBD1	0.8	0.667594	0.946874
PCBP1	0.82	0.684575	0.99217
PCGF1	0.8	0.668046	0.952462
PCM1	1.28	1.06218	1.53261
PCNA	0.71	0.60266	0.835155
PCSK6	0.79	0.662335	0.953696
PCSK7	1.36	1.14579	1.62524
PCSK9	0.69	0.595176	0.810694
PDCD11	0.81	0.677362	0.971047
PDCD1LG2	1.2	1.00249	1.4424
PDCD6	0.71	0.603751	0.832281
PDE10A	1.37	1.14413	1.65233
PDE1A	1.54	1.2999	1.82023
PDE1C	1.44	1.21177	1.70171
PDE2A	1.5	1.28664	1.74289
PDE3A	1.53	1.32532	1.75581
PDE3B	1.41	1.19261	1.66486
PDE4B	1.23	1.02988	1.47017
PDE4D	1.23	1.01552	1.49106
PDE4DIP	1.34	1.12437	1.58538
PDE5A	1.36	1.15358	1.61223
PDE7B	1.51	1.27577	1.77548
PDE8B	1.48	1.26989	1.72016
PDE9A	1.61	1.38972	1.86505
PDGFC	1.53	1.27145	1.83551
PDGFRA	1.41	1.1816	1.67401
PDGFRB	1.42	1.20254	1.68191
PDIA3	0.7	0.604729	0.808913
PDK1	0.63	0.535419	0.741257
PDK2	1.3	1.09958	1.5402
PDK3	1.34	1.13377	1.57568
PDK4	1.36	1.17059	1.59026
PDLIM1	0.71	0.619678	0.819533
PDPN	1.26	1.06736	1.49595
PDZD3	0.8	0.6633	0.974619
PDZD8	0.69	0.587713	0.810536
PEBP1	0.72	0.598537	0.859391
PECAM1	1.33	1.13659	1.55232
PEG10	1.62	1.39448	1.88412
PEG3	1.5	1.31187	1.72381
PER1	1.43	1.22408	1.67481
PER3	1.23	1.03373	1.47122
PEX11B	0.74	0.62682	0.869053
PEX14	0.77	0.634742	0.924551
PFDN5	1.35	1.13663	1.60255
PGAP2	0.73	0.608697	0.865317
PGBD1	1.5	1.28125	1.75759
PGR	1.48	1.279	1.70849
PHB	0.72	0.605397	0.8605
PHB2	0.7	0.580733	0.839914
PHF1	1.45	1.24304	1.68306
PHF10	1.43	1.23166	1.65335
PHF2	1.45	1.25444	1.68182
PHF21A	1.43	1.21971	1.66977
PHF5A	0.81	0.681364	0.974236
PHF6	0.77	0.647035	0.915176
PHLDA3	1.63	1.39472	1.9098
PHTF2	1.25	1.04012	1.50557
PIAS1	1.26	1.03562	1.52189
PICALM	1.26	1.0393	1.53487
PIDD1	0.72	0.596119	0.878903
PIGU	0.73	0.615023	0.860808
PIK3C2B	0.67	0.569597	0.796753
PIK3CB	0.68	0.575275	0.801194
PIK3R1	1.4	1.18548	1.65785
PIK3R3	1.19	1.00242	1.40454
PIM1	1.36	1.14397	1.6141
PINK1	1.39	1.18453	1.62984
PIP4K2B	1.59	1.33687	1.88456
PIP5K1A	0.74	0.616924	0.898838
PITPNM1	0.71	0.606278	0.837796
PITX2	1.66	1.42175	1.93093
PKD2	1.55	1.33221	1.80444
PKIA	1.54	1.31203	1.81567
PKIG	1.5	1.29135	1.73739
PKN2	0.72	0.612738	0.839543
PKN3	0.7	0.580392	0.83379
PKNOX2	1.47	1.26586	1.69924
PLA2G4C	1.41	1.19253	1.66455
PLAA	0.76	0.652539	0.890049
PLAG1	1.37	1.14346	1.64295
PLAGL1	1.52	1.26339	1.82682
PLAT	1.49	1.23454	1.79432
PLCB3	0.63	0.53092	0.742665
PLCD1	1.31	1.10303	1.55742
PLCD4	1.33	1.15362	1.54473
PLCH1	0.7	0.606531	0.81335
PLCL1	1.53	1.29919	1.80759
PLCXD3	1.43	1.22277	1.676
PLEK2	0.7	0.602459	0.804363
PLEKHA1	0.74	0.630813	0.87526
PLEKHB1	1.28	1.06127	1.54426
PLEKHG1	1.28	1.07001	1.53207
PLEKHG2	1.45	1.23161	1.70087
PLEKHG6	0.78	0.640364	0.93983
PLEKHM3	1.46	1.24054	1.71052
PLP1	1.47	1.28403	1.68435
PLPP1	1.51	1.27682	1.77867
PLPP3	1.45	1.20267	1.74401
PLXNA4	1.59	1.35473	1.85703
PLXNB2	0.76	0.635572	0.899308
PLXNC1	1.22	1.01879	1.46171
PMAIP1	0.83	0.689474	0.998849
PMEPA1	1.36	1.13832	1.63439
PMS2	0.75	0.62806	0.899471
PNRC1	1.4	1.19061	1.65329
POGZ	1.46	1.22715	1.72736
POLD1	0.72	0.605808	0.856978
POLE	0.74	0.622167	0.890323
POLR2A	0.71	0.599792	0.832891
POLR2L	0.82	0.678624	0.978861
POLR3C	0.76	0.634775	0.921096
POLR3G	0.75	0.626142	0.902263
POLR3K	0.67	0.573487	0.789423
POU2F3	0.76	0.641785	0.908409
POU5F1	0.75	0.630341	0.891851
POU5F1B	1.22	1.02301	1.45819
POU6F1	1.46	1.27112	1.66907
PPARG	0.73	0.629421	0.837845
PPARGC1A	1.38	1.14256	1.65767
PPBP	0.77	0.636356	0.926033
PPFIA1	0.76	0.646478	0.898504
PPM1L	1.32	1.08813	1.59254
PPP1CB	1.45	1.26152	1.67604
PPP1R10	0.74	0.614806	0.891719
PPP1R12A	1.41	1.19334	1.66232
PPP1R12B	1.44	1.24657	1.6702
PPP1R13L	0.81	0.678016	0.973177
PPP1R15B	0.68	0.577186	0.793039
PPP1R17	1.23	1.05245	1.44505
PPP1R1A	1.56	1.35061	1.79273
PPP1R1B	0.7	0.577223	0.840051
PPP1R2	1.41	1.17778	1.69918
PPP1R8	0.77	0.64791	0.916725
PPP2R2B	1.3	1.08259	1.55808
PPP2R5A	0.82	0.688302	0.96898
PPP2R5D	0.76	0.625898	0.915825
PPP3CB	1.37	1.15988	1.61882
PPP4C	0.71	0.601965	0.843655
PPP4R1	0.81	0.673392	0.971652
PPP5C	0.8	0.668671	0.961016
PPRC1	0.83	0.692181	0.993455
PPT1	1.26	1.03502	1.52595
PRAM1	1.23	1.03242	1.47222
PRDM10	0.67	0.572006	0.793148
PRDM15	0.75	0.620807	0.904309
PRDM2	1.42	1.20229	1.68422
PRDM4	0.64	0.546399	0.755947
PRDM5	1.64	1.38543	1.94792
PRDM6	1.53	1.2971	1.80382
PRDX1	0.7	0.597985	0.811454
PRDX2	0.72	0.613285	0.853453
PRDX4	0.72	0.614564	0.85494
PREB	0.74	0.623127	0.873746
PREX2	1.51	1.27572	1.79603
PRKAA2	1.54	1.34382	1.77316
PRKAB1	1.22	1.0264	1.45954
PRKAB2	1.31	1.1038	1.56542
PRKACA	1.48	1.25839	1.73691
PRKACB	1.41	1.186	1.68455
PRKAG1	0.78	0.665085	0.922677
PRKAG2	1.34	1.13212	1.57877
PRKAR1A	1.54	1.28591	1.8512
PRKAR2B	1.48	1.24495	1.76063
PRKCB	1.41	1.1922	1.66517
PRKCD	0.73	0.610347	0.863595
PRKCE	1.39	1.15719	1.65794
PRKCI	0.73	0.626312	0.855247
PRKCZ	0.68	0.574551	0.810822
PRKD1	1.51	1.27808	1.77371
PRKD3	1.48	1.24102	1.76465
PRKDC	0.77	0.644978	0.916461
PRKG1	1.54	1.32709	1.78982
PRMT1	0.79	0.659473	0.944625
PRMT2	1.55	1.32899	1.804
PRMT5	0.81	0.673501	0.963675
PRMT6	0.78	0.650745	0.946842
PRMT7	0.74	0.606462	0.898853
PRRX1	1.39	1.17129	1.65172
PRSS8	0.75	0.624213	0.89256
PSD3	1.45	1.19842	1.74359
PSD4	0.67	0.555971	0.80289
PSEN1	0.69	0.595754	0.804033
PSIP1	1.33	1.12923	1.5713
PSMC3	0.81	0.67767	0.979298
PSMC3IP	0.74	0.624261	0.867921
PSMD9	0.66	0.555449	0.775986
PSPC1	0.67	0.572424	0.784497
PSRC1	0.74	0.617358	0.881512
PTAFR	0.71	0.600057	0.850973
PTCH1	1.4	1.17919	1.67133
PTEN	1.38	1.16566	1.63179
PTGDR2	0.82	0.678545	0.982337
PTGER1	1.44	1.20661	1.7122
PTGER2	1.28	1.07484	1.53001
PTGER3	1.56	1.32377	1.84099
PTGES2	0.7	0.583314	0.830771
PTGES3	0.76	0.646388	0.889168
PTGFR	1.42	1.1991	1.68397
PTGIS	1.53	1.32071	1.76953
PTH2R	1.32	1.09666	1.58547
PTHLH	1.43	1.21019	1.68878
PTK2	0.78	0.652061	0.944071
PTK7	1.32	1.11053	1.55944
PTN	1.58	1.35714	1.83634
PTPN14	1.58	1.36145	1.83042
PTPN22	0.76	0.630997	0.914946
PTPRB	1.42	1.18505	1.70401
PTPRD	1.48	1.23553	1.76425
PTPRF	0.73	0.616348	0.863001
PTPRG	1.31	1.08039	1.59513
PTPRH	0.76	0.644555	0.894214
PTPRJ	0.72	0.622362	0.837196
PTPRK	0.72	0.614671	0.854314
PTPRM	1.55	1.31891	1.82652
PTPRS	1.53	1.32616	1.76311
PTPRT	1.28	1.08109	1.52189
PTPRU	1.23	1.0289	1.47955
PTPRZ1	1.36	1.12789	1.64245
PTTG1	0.72	0.617616	0.849788
PUF60	0.77	0.644393	0.924068
PURA	1.44	1.23821	1.6723
PURB	1.32	1.10392	1.574
PWP2	0.76	0.633324	0.901699
PYCARD	0.69	0.592794	0.804601
PYGO1	1.53	1.29875	1.80752
QKI	1.47	1.23943	1.74811
RAB10	0.7	0.600486	0.807098
RAB12	1.48	1.28582	1.71407
RAB14	0.69	0.588321	0.798406
RAB15	0.81	0.667083	0.975406
RAB17	0.78	0.650169	0.935148
RAB18	1.26	1.04179	1.52559
RAB20	0.7	0.602482	0.823404
RAB22A	0.8	0.666298	0.971223
RAB23	1.57	1.3572	1.81203
RAB25	0.72	0.614087	0.847203
RAB26	0.75	0.625504	0.89241
RAB29	1.51	1.27356	1.801
RAB2A	0.77	0.658187	0.894105
RAB2B	1.45	1.23786	1.70209
RAB30	1.37	1.14908	1.62702
RAB31	1.42	1.19534	1.68468
RAB32	1.34	1.11344	1.61538
RAB33B	1.38	1.16956	1.63973
RAB34	1.55	1.32107	1.81696
RAB38	1.25	1.03382	1.51932
RAB3B	1.56	1.30507	1.85774
RAB40C	0.72	0.599885	0.87269
RAB5B	1.3	1.08126	1.55843
RAB5C	0.83	0.696447	0.997135
RAB6B	1.48	1.27594	1.70607
RAB8B	1.22	1.01884	1.46612
RAB9B	1.44	1.23574	1.6885
RABEP1	1.28	1.06857	1.53243
RABGAP1	1.51	1.29986	1.74475
RABIF	0.68	0.576123	0.803465
RABL2A	1.44	1.23888	1.67367
RABL2B	0.82	0.685028	0.978402
RAC1	0.75	0.641183	0.870205
RACGAP1	0.77	0.647176	0.915819
RAD21	0.81	0.679248	0.964002
RAD51	0.71	0.608773	0.839225
RAD9A	0.73	0.611194	0.879289
RALA	0.71	0.615999	0.825857
RALGAPA2	0.67	0.571569	0.779297
RALGPS1	0.71	0.596992	0.847427
RALGPS2	0.76	0.64759	0.887211
RAMP1	1.47	1.24632	1.74464
RAMP2	1.49	1.26387	1.75028
RAMP3	1.28	1.07768	1.5253
RAN	0.74	0.625856	0.870019
RANBP1	0.73	0.614237	0.871874
RANGAP1	0.78	0.651574	0.932346
RAP1A	1.42	1.21032	1.66558
RAP1GAP2	0.69	0.577544	0.821254
RAP2C	0.76	0.641799	0.889308
RAPGEF1	1.24	1.05327	1.46966
RAPGEF2	1.23	1.01836	1.49547
RAPGEF3	1.21	1.01197	1.45713
RAPGEF4	1.39	1.16722	1.66712
RAPGEFL1	0.71	0.59947	0.843779
RAPH1	0.69	0.595686	0.797783
RARB	1.58	1.30916	1.89575
RASEF	0.72	0.615805	0.845213
RASGEF1A	1.36	1.14895	1.61946
RASGEF1B	0.74	0.612367	0.895001
RASGRF2	1.33	1.13793	1.56229
RASGRP2	1.43	1.20928	1.68977
RASIP1	1.36	1.16069	1.58707
RASL11A	1.29	1.09273	1.53271
RASL11B	1.57	1.36378	1.80589
RASL12	1.56	1.32193	1.83459
RASSF1	0.69	0.565083	0.840108
RASSF2	1.36	1.13813	1.61982
RASSF7	0.7	0.593197	0.816305
RASSF8	1.61	1.38427	1.87017
RASSF9	1.66	1.39489	1.9837
RBBP8	0.7	0.60536	0.815631
RBCK1	0.76	0.630952	0.913141
RBFOX2	1.57	1.35407	1.8254
RBL1	0.73	0.618398	0.86226
RBM10	0.78	0.647074	0.942732
RBM14	0.83	0.685397	0.993332
RBM15	0.71	0.602481	0.843038
RBPMS	1.53	1.32832	1.75082
RBSN	1.4	1.21144	1.62295
RCAN1	1.3	1.09095	1.5536
RCAN2	1.54	1.33989	1.75995
RCOR1	0.76	0.64625	0.895324
RCOR3	1.4	1.1964	1.64136
RELN	1.41	1.19564	1.66281
REM2	0.8	0.659652	0.96529
RERE	1.4	1.18314	1.64612
RERG	1.57	1.38021	1.79633
RERGL	1.36	1.15987	1.5922
RET	1.55	1.32444	1.80777
REXO4	0.77	0.641349	0.924134
RFC4	0.76	0.639882	0.899188
RFX2	1.44	1.24211	1.66976
RFX3	0.7	0.58671	0.838348
RFXANK	0.76	0.634551	0.918519
RGL1	1.46	1.22836	1.74527
RGMA	1.5	1.30853	1.72581
RGMB	1.45	1.24724	1.6785
RGN	1.55	1.29822	1.8449
RGS14	0.66	0.553061	0.794111
RGS17	1.35	1.11779	1.62295
RGS2	1.43	1.20538	1.68783
RGS4	1.58	1.35147	1.84598
RGS5	1.51	1.27415	1.79079
RGS7BP	1.35	1.1305	1.6236
RHBDL3	1.54	1.33196	1.78581
RHOB	1.49	1.28331	1.72616
RHOBTB2	1.5	1.27582	1.75237
RHOJ	1.55	1.32244	1.8199
RHOQ	1.49	1.27262	1.73336
RHOT2	0.72	0.592018	0.865839
RHOU	1.34	1.10579	1.61408
RHOV	0.69	0.580987	0.820115
RHOXF2B	1.37	1.1471	1.62954
RHPN2	0.69	0.600072	0.795313
RIC8B	1.22	1.01435	1.47437
RICTOR	1.25	1.03022	1.50918
RIN1	0.69	0.587089	0.814353
RIN3	1.34	1.13103	1.58498
RINT1	0.78	0.657164	0.917382
RIPK2	0.72	0.609997	0.845663
RND2	1.66	1.40757	1.95502
RNF138	0.76	0.646241	0.904815
RNF14	1.47	1.25089	1.73118
RNF213	0.72	0.603263	0.855256
RNF43	0.73	0.607459	0.884685
RNF6	0.68	0.587815	0.782938
ROBO1	1.55	1.30427	1.84798
ROBO2	1.62	1.33791	1.96562
ROCK1	1.39	1.16894	1.64614
ROPN1B	1.59	1.33519	1.88543
ROR1	1.57	1.34169	1.83886
ROR2	1.52	1.31157	1.75848
RORA	1.36	1.14189	1.62414
RORB	1.25	1.0477	1.49612
RPL7L1	0.81	0.677728	0.969444
RPN1	0.71	0.607579	0.823893
RPS6KA1	0.62	0.529352	0.734812
RPS6KA2	1.38	1.16314	1.6448
RPS6KA5	1.32	1.12782	1.54432
RPS6KA6	1.51	1.28391	1.7661
RPS6KB2	0.74	0.616493	0.88974
RPS6KC1	1.48	1.2443	1.76688
RRAD	1.62	1.35887	1.9318
RRAGB	1.46	1.25576	1.68839
RRAGC	0.8	0.674317	0.947971
RRAS	1.47	1.24474	1.72773
RRBP1	0.74	0.618075	0.877218
RREB1	0.67	0.565346	0.792678
RRN3	0.81	0.681373	0.963679
RSC1A1	0.72	0.609005	0.840288
RSF1	1.43	1.20479	1.70878
RSU1	1.49	1.27107	1.73896
RTKN	0.78	0.651134	0.927348
RTKN2	0.71	0.593641	0.846836
RTL3	1.52	1.32044	1.74905
RTN1	1.34	1.12529	1.60199
RTN2	1.5	1.27139	1.77813
RUNDC3A	1.49	1.29275	1.72748
RUNX1T1	1.54	1.3235	1.79727
RUNX2	1.22	1.01926	1.45436
RUSC1	0.78	0.65194	0.928549
RUVBL1	0.71	0.611708	0.82773
RUVBL2	0.72	0.600042	0.852352
RYBP	1.26	1.04373	1.52668
RYK	1.47	1.24098	1.74966
S100A10	0.79	0.670912	0.937002
S100A11	0.78	0.666309	0.91351
S100A6	0.74	0.63245	0.874294
S1PR1	1.45	1.22472	1.72036
S1PR2	1.2	1.01044	1.43604
S1PR3	1.56	1.33984	1.80961
SAFB	0.8	0.66717	0.962052
SALL2	1.56	1.35651	1.79258
SAP18	0.8	0.677641	0.940998
SAP30L	1.39	1.18132	1.63359
SARM1	1.44	1.21342	1.70869
SATB1	1.33	1.12878	1.57115
SATB2	0.74	0.624569	0.883038
SAV1	1.41	1.18134	1.67133
SCARB1	0.76	0.630994	0.918177
SCARF1	1.22	1.02832	1.45631
SCG2	1.43	1.21998	1.66556
SCG5	1.53	1.27665	1.83391
SCMH1	1.47	1.29859	1.67497
SCML4	0.76	0.64033	0.905739
SCT	1.31	1.11195	1.54559
SCTR	1.29	1.07195	1.54745
SDCBP2	0.78	0.660619	0.925246
SDHA	0.65	0.547363	0.781733
SDHB	0.72	0.611118	0.84328
SDHC	0.72	0.607157	0.846921
SEC14L2	0.7	0.59697	0.819974
SEC31A	1.39	1.15554	1.67983
SECTM1	0.66	0.553531	0.786995
SELE	1.26	1.07107	1.47976
SELENOS	0.71	0.608807	0.831099
SEPTIN5	1.57	1.36062	1.80276
SEPTIN6	1.3	1.10101	1.53579
SERGEF	1.47	1.28212	1.68461
SERP2	1.5	1.25373	1.78359
SERTAD2	1.29	1.07246	1.55203
SET	0.82	0.684832	0.984311
SETBP1	1.53	1.32134	1.77449
SETD7	1.45	1.23907	1.68844
SETDB1	0.72	0.600581	0.858815
SFMBT1	0.7	0.59418	0.832228
SFMBT2	1.2	1.0037	1.4316
SFN	0.7	0.593768	0.825424
SFPQ	0.74	0.616914	0.880883
SGK2	0.76	0.637027	0.903863
SGPL1	0.74	0.63738	0.869812
SGSM1	1.51	1.27024	1.80428
SGSM2	1.42	1.23094	1.64458
SH2B3	1.26	1.05114	1.50419
SH2D2A	0.74	0.618187	0.87577
SH2D3A	0.72	0.615191	0.833306
SH2D3C	1.28	1.08566	1.5084
SH3BGR	1.35	1.16716	1.55915
SH3BGRL	1.47	1.25433	1.73014
SH3BP1	0.7	0.57942	0.83466
SH3BP5	1.42	1.1953	1.67847
SH3GL3	1.36	1.15622	1.59969
SH3RF1	0.77	0.649714	0.91372
SHC2	1.49	1.27031	1.73964
SHC3	1.43	1.22321	1.67801
SHC4	1.63	1.39537	1.90834
SHH	0.79	0.659879	0.938657
SIGIRR	0.81	0.664519	0.978796
SIK2	1.41	1.18075	1.67554
SIM2	0.72	0.607726	0.854978
SIN3A	1.39	1.17271	1.64525
SIN3B	1.44	1.23926	1.66322
SIPA1	1.36	1.16778	1.57721
SIPA1L2	1.38	1.1436	1.65539
SIPA1L3	0.72	0.605801	0.861905
SIRT1	1.47	1.25673	1.71848
SIRT5	0.71	0.593978	0.849067
SIRT7	0.68	0.580248	0.794436
SIX2	1.56	1.34727	1.816
SKAP2	1.5	1.25903	1.77619
SLA2	0.82	0.681982	0.99606
SLC1A2	1.38	1.16215	1.64104
SLC20A1	0.74	0.628387	0.872503
SLC22A17	1.52	1.31815	1.75446
SLC2A4RG	1.26	1.06447	1.48538
SLC35B2	0.77	0.642703	0.91285
SLC4A11	0.72	0.608542	0.855087
SLC7A1	0.71	0.598551	0.84152
SLC7A3	1.41	1.20396	1.64263
SLC9A3R1	0.7	0.588241	0.830084
SLIRP	0.77	0.654728	0.914324
SLIT2	1.58	1.34675	1.86376
SMAD5	1.25	1.03737	1.51061
SMAD6	0.75	0.627032	0.902056
SMAD7	1.43	1.20633	1.6941
SMAD9	1.51	1.31004	1.73518
SMAP2	0.83	0.691141	0.999487
SMARCA1	1.67	1.42592	1.95646
SMARCA2	1.44	1.24115	1.66102
SMARCA4	0.76	0.637713	0.909186
SMARCB1	0.72	0.601717	0.860613
SMARCC1	0.71	0.600108	0.842877
SMARCD1	0.78	0.653724	0.926001
SMARCD2	0.72	0.601296	0.865416
SMARCD3	1.56	1.34415	1.8095
SMC1A	0.76	0.635315	0.901548
SMC3	0.82	0.682927	0.974297
SMOC1	1.35	1.12084	1.62971
SMOC2	1.49	1.30385	1.71206
SMPD1	1.23	1.02075	1.47374
SMPD2	0.72	0.609098	0.858497
SMURF2	1.31	1.09063	1.582
SMYD1	1.47	1.29336	1.67534
SNAI2	1.26	1.06957	1.49241
SNAPC3	1.29	1.08976	1.5296
SNAPC5	1.28	1.08021	1.50842
SNCA	1.34	1.11373	1.60741
SNCAIP	1.41	1.17063	1.68948
SND1	0.71	0.598372	0.837996
SNIP1	1.21	1.00782	1.46448
SNW1	0.82	0.697287	0.964551
SNX29	1.41	1.20146	1.66567
SOCS5	1.57	1.328	1.84565
SOCS6	0.72	0.60884	0.845533
SOD1	0.72	0.605155	0.856812
SOHLH1	1.21	1.00072	1.45461
SORBS1	1.46	1.27571	1.66744
SORBS3	1.52	1.30799	1.76897
SORCS1	1.47	1.26404	1.7165
SORCS2	1.47	1.24786	1.73279
SOS2	1.37	1.14095	1.64818
SOX10	1.46	1.27917	1.65885
SOX15	1.48	1.30018	1.67552
SOX17	1.44	1.22988	1.69096
SOX2	1.34	1.11819	1.60301
SOX5	1.51	1.27731	1.78163
SOX6	1.37	1.13761	1.65456
SOX7	1.41	1.20836	1.65489
SOX8	1.47	1.24651	1.7312
SOX9	0.73	0.617008	0.858985
SP1	0.73	0.613239	0.880266
SP3	0.76	0.626267	0.914866
SP4	1.4	1.18905	1.65815
SP6	0.72	0.606762	0.863521
SP8	0.74	0.62068	0.891037
SPAG5	0.74	0.629017	0.882088
SPARCL1	1.55	1.3468	1.78834
SPDEF	0.8	0.66912	0.959335
SPG21	0.72	0.609841	0.860544
SPOCK1	1.41	1.18837	1.66389
SPOP	1.49	1.30068	1.70275
SPRY1	1.54	1.30272	1.82495
SPSB1	1.35	1.13797	1.59228
SPTBN1	0.72	0.599152	0.862564
SRC	0.76	0.633571	0.90188
SREBF1	0.65	0.544466	0.774114
SREBF2	0.81	0.672726	0.966186
SRF	1.46	1.26524	1.6889
SRGAP3	1.24	1.03865	1.4923
SRI	0.77	0.654509	0.90424
SRPK1	0.7	0.595284	0.816237
SRSF10	0.74	0.616011	0.895536
SRSF2	0.74	0.627506	0.871936
SRSF3	0.75	0.633009	0.891542
SSBP2	1.49	1.29139	1.72177
SSRP1	0.73	0.612067	0.868315
SSTR2	1.5	1.2629	1.77437
SSX3	0.76	0.617233	0.932546
SSX4	1.22	1.02514	1.45137
SSX4B	0.76	0.613906	0.94836
ST18	1.27	1.05937	1.53314
STAC	1.49	1.27647	1.73371
STAMBP	0.72	0.614138	0.844062
STARD13	1.48	1.27888	1.7213
STARD8	1.33	1.13142	1.57383
STAT3	1.24	1.03677	1.49177
STAT5B	1.5	1.28714	1.73851
STC1	1.35	1.14608	1.5879
STK24	0.76	0.645856	0.902577
STK26	0.79	0.663206	0.929944
STK38	0.81	0.686639	0.96581
STK38L	1.25	1.03608	1.51927
STK39	0.75	0.638271	0.882865
STK4	0.77	0.636325	0.922258
STMN1	0.8	0.664934	0.96094
STMN2	1.28	1.0764	1.522
STMN3	1.48	1.24503	1.75234
STRADB	0.69	0.571846	0.825731
STRN3	1.39	1.15634	1.66258
STX2	1.47	1.27133	1.7088
STXBP4	1.4	1.18049	1.65802
STYXL1	0.69	0.585713	0.819561
SUDS3	0.73	0.60703	0.871466
SUMO1	0.79	0.667945	0.929705
SUPT16H	0.81	0.678051	0.964794
SUV39H1	0.74	0.623586	0.88902
SUV39H2	0.76	0.64415	0.906331
SUZ12	0.74	0.621621	0.878468
SYDE1	1.5	1.28381	1.75246
TAB2	1.28	1.06685	1.54062
TACR1	1.46	1.2616	1.68326
TACR2	1.45	1.26242	1.6678
TADA1	0.8	0.677347	0.949686
TADA2A	0.81	0.66559	0.987974
TAF12	0.77	0.646963	0.90765
TAF1D	0.82	0.690723	0.984322
TAF2	0.76	0.636733	0.914612
TAF3	1.47	1.24217	1.74709
TAF4	0.79	0.649815	0.949397
TAF4B	0.73	0.61123	0.873645
TAF5	0.71	0.601554	0.846776
TAF5L	0.75	0.629372	0.883045
TAF9B	1.5	1.27453	1.76489
TAL1	1.46	1.24489	1.72385
TAOK1	1.44	1.20176	1.73075
TARBP2	0.7	0.598176	0.826304
TARDBP	0.75	0.626784	0.887433
TBC1D1	1.51	1.31241	1.74555
TBC1D19	1.5	1.27751	1.76424
TBC1D2	0.72	0.602659	0.850391
TBC1D20	1.54	1.28787	1.8306
TBC1D22B	0.72	0.598658	0.857168
TBC1D24	0.77	0.646048	0.92734
TBC1D2B	1.32	1.12512	1.54789
TBC1D30	0.7	0.594126	0.813734
TBC1D31	0.75	0.634577	0.891742
TBC1D32	0.78	0.638181	0.952683
TBC1D5	1.23	1.02011	1.47155
TBC1D7	0.76	0.642539	0.90983
TBC1D8B	0.71	0.611709	0.835724
TBC1D9	1.51	1.25784	1.80505
TBCK	1.33	1.10808	1.59039
TBL1X	1.53	1.32359	1.76385
TBL1XR1	0.73	0.624227	0.86449
TBL3	0.81	0.669737	0.977113
TBPL1	0.74	0.632306	0.875338
TBX1	1.5	1.28555	1.7584
TBX2	1.45	1.21234	1.72559
TBX3	0.75	0.620633	0.909867
TBXA2R	1.32	1.12775	1.53498
TCEA2	1.64	1.4011	1.92989
TCEAL1	1.55	1.3537	1.77447
TCEAL2	1.49	1.3085	1.69719
TCEAL3	1.57	1.35314	1.81339
TCEAL4	1.54	1.34231	1.77529
TCEAL7	1.53	1.31227	1.79085
TCEAL8	1.55	1.29534	1.84601
TCERG1	0.72	0.604613	0.865876
TCF12	1.35	1.12929	1.6231
TCF15	1.6	1.37972	1.8575
TCF19	0.71	0.602653	0.836347
TCF20	0.74	0.622943	0.879709
TCF21	1.48	1.24261	1.7539
TCF25	0.74	0.608246	0.898273
TCF3	0.76	0.637774	0.907973
TCF4	1.52	1.28742	1.79691
TCF7L1	1.59	1.37539	1.84426
TCF7L2	0.77	0.65602	0.902919
TCL1A	1.19	1.00402	1.40346
TDG	0.68	0.584042	0.793273
TEAD1	1.58	1.36655	1.8191
TEAD3	1.51	1.3273	1.72671
TEF	1.37	1.1724	1.61233
TEK	1.37	1.15774	1.62536
TENM2	1.45	1.21389	1.73251
[truncated: 494 more rows]

## Sheet: OS.GSE15459
row.names	HR	low	high
Name
ACAD8	0.7	0.573167	0.848458
ACSL6	0.75	0.598822	0.931485
ACTB	1.27	1.03216	1.55336
ACVR1	1.33	1.04056	1.70728
ADAP2	1.39	1.1253	1.71214
ADGRF4	1.39	1.12154	1.71223
ADM	1.26	1.02103	1.55544
ADNP	1.27	1.02334	1.57025
ADORA2B	1.38	1.1198	1.712
ADRA2A	0.74	0.595084	0.920931
AEBP1	1.41	1.15587	1.72724
AHR	1.32	1.061	1.64685
AJUBA	1.5	1.22405	1.82596
ALS2	1.27	1.05087	1.54441
ANKRD1	1.5	1.22706	1.83998
ANTXR1	1.52	1.23787	1.87219
ANXA5	1.33	1.06411	1.6631
ARF3	1.27	1.0302	1.55542
ARFGEF3	0.82	0.684655	0.988352
ARHGAP44	0.74	0.606007	0.911997
ARHGEF37	0.73	0.580851	0.906859
ARNTL2	1.27	1.02485	1.56193
ARRB1	0.73	0.582254	0.908802
ASAH2B	1.28	1.01875	1.60255
ASB8	0.78	0.637055	0.950521
ATP2A2	1.34	1.09258	1.64734
ATP2C1	1.37	1.08473	1.72424
ATR	1.28	1.03055	1.60115
AXL	1.24	1.01185	1.50747
BAG1	0.81	0.661874	0.980831
BCL9L	1.3	1.07485	1.56582
BDKRB1	1.22	1.00309	1.47363
BIRC7	1.22	1.0164	1.47398
BLOC1S2	1.29	1.02463	1.61987
BMX	0.81	0.663968	0.996221
BRF2	1.28	1.01222	1.60713
BTG1	0.74	0.593506	0.926391
BZW1	1.33	1.05193	1.69284
CAD	1.32	1.0662	1.63591
CAPN3	0.82	0.676151	0.99822
CAT	0.77	0.637213	0.934141
CAVIN4	1.23	1.02106	1.4886
CBFA2T3	0.76	0.612635	0.936866
CBFB	1.28	1.03441	1.57737
CBX2	1.25	1.01147	1.54303
CCDC88C	0.8	0.652827	0.972447
CCKAR	0.75	0.60033	0.926015
CCL13	1.29	1.04655	1.58294
CCL15	0.8	0.647426	0.986341
CCL16	0.8	0.634012	0.997321
CCL18	1.27	1.03317	1.56064
CCL2	1.22	1.00115	1.47955
CCL25	0.8	0.65259	0.991202
CCL28	0.83	0.689174	0.995463
CCN2	1.28	1.06159	1.5502
CCND1	1.28	1.02869	1.58571
CD3EAP	1.37	1.11791	1.68958
CD72	1.25	1.02584	1.52656
CD79A	0.8	0.650259	0.983958
CDA	1.34	1.06736	1.68698
CDH2	1.28	1.04329	1.57368
CDKN2B	1.37	1.11701	1.67012
CERK	0.76	0.618222	0.937963
CHRNA5	1.46	1.18051	1.80759
CHST11	1.28	1.04193	1.56129
CLDN4	1.24	1.00493	1.52204
CLEC5A	1.41	1.17864	1.69024
CLEC7A	1.23	1.01397	1.50276
CNTFR	0.73	0.594098	0.89752
COMMD7	1.26	1.01685	1.56203
CORO1C	1.23	1.03426	1.47323
CSDC2	1.29	1.06116	1.57906
CSF1R	1.29	1.04596	1.60024
CSNK1G1	1.3	1.03726	1.6399
CSRNP2	1.25	1.03925	1.50214
CTNNB1	1.43	1.16145	1.76631
CTNND2	0.77	0.633119	0.944134
CXXC1	0.78	0.652589	0.941989
CYTH2	1.24	1.01205	1.5305
DACH2	0.71	0.559776	0.88807
DACT1	1.39	1.12408	1.71136
DDX10	1.29	1.03369	1.60401
DDX17	0.79	0.64606	0.959012
DEPDC4	0.74	0.603783	0.915686
DFFB	0.74	0.599507	0.922831
DGKI	1.25	1.02816	1.51464
DIRAS2	0.74	0.59038	0.929691
DLX5	1.32	1.08373	1.61468
DMAP1	0.66	0.526782	0.832666
DMRTA1	0.79	0.646806	0.970067
DOK5	1.44	1.16666	1.76572
DPF3	0.75	0.601403	0.929297
DPYSL2	1.22	1.00873	1.47135
DPYSL3	1.25	1.03665	1.51881
DUSP10	1.27	1.03284	1.56166
E2F3	1.26	1.01826	1.55482
E2F6	1.34	1.07396	1.68189
ECT2	1.3	1.05103	1.61658
EDNRA	1.22	1.01876	1.45399
EGR2	1.37	1.11317	1.68504
ELK1	1.35	1.09792	1.65596
ELK3	1.22	1.00325	1.48365
ELL3	0.76	0.628464	0.92437
ELN	1.31	1.056	1.61885
EPHA2	1.24	1.00214	1.53776
ERCC2	1.25	1.01778	1.52497
ERCC6	1.27	1.01659	1.59654
EREG	1.4	1.14631	1.70745
ESRRB	0.72	0.569835	0.905136
ETV1	1.24	1.02846	1.50059
ETV4	1.24	1.00662	1.52475
EYA4	1.27	1.03947	1.54396
F2R	1.58	1.27192	1.96227
F2RL2	1.31	1.0427	1.63378
FAM120B	0.77	0.636746	0.923233
FBXW4	0.8	0.64922	0.992831
FER	1.21	1.01207	1.44855
FEV	0.65	0.511956	0.830302
FGF1	1.29	1.07489	1.54888
FGF9	0.79	0.64255	0.965235
FKBP1A	1.31	1.05973	1.62907
FLRT3	0.77	0.62429	0.940602
FOS	0.74	0.595735	0.928038
FOSL1	1.32	1.06095	1.63132
FOXC2	1.27	1.04414	1.55246
FOXN2	1.26	1.02259	1.55904
FOXS1	1.52	1.2272	1.88055
FSTL1	1.38	1.12138	1.70736
FZD1	1.25	1.02115	1.51896
FZD2	1.24	1.02644	1.487
FZD7	1.2	1.00266	1.448
FZD8	1.31	1.04787	1.63056
GABPB2	0.74	0.598239	0.905495
GADD45G	0.76	0.62117	0.93601
GARNL3	0.78	0.621975	0.971547
GATA1	0.77	0.630345	0.942844
GLI1	1.37	1.10334	1.71151
GLI2	1.27	1.03884	1.54479
GLI3	1.21	1.00392	1.46299
GLIS2	1.33	1.09366	1.62872
GMPS	1.26	1.02737	1.5471
GNB3	0.79	0.640738	0.965516
GNB4	1.23	1.01241	1.49496
GNG7	0.81	0.667065	0.988102
GNRHR	0.76	0.622502	0.928437
GP1BA	0.76	0.605095	0.945696
GPR176	1.26	1.03897	1.52628
GPR31	0.76	0.605506	0.952648
GPR52	0.77	0.616635	0.953222
GPR68	1.32	1.07646	1.62037
GPR85	1.25	1.01942	1.53692
GREM1	1.39	1.12649	1.72299
GRHL1	1.28	1.02405	1.5886
GRIA3	0.75	0.597085	0.935337
GRIA4	0.67	0.534633	0.830756
GRIK1	0.79	0.627887	0.987791
GRIN2C	0.74	0.589896	0.928862
GRN	1.28	1.04472	1.56779
GUCA1B	0.78	0.616929	0.982558
H4C13	0.81	0.667137	0.995604
H4C4	0.81	0.665307	0.982128
HES2	1.25	1.00702	1.54664
HES4	1.24	1.01723	1.5119
HEXIM2	0.81	0.657914	0.987428
HEY1	1.23	1.01076	1.48608
HEYL	1.4	1.144	1.70826
HIP1	1.34	1.08894	1.66089
HMGA2	1.46	1.17463	1.81299
HMGN2	0.81	0.659786	0.996691
HNRNPUL1	1.28	1.02738	1.59169
HOPX	1.65	1.31931	2.07101
HOXC6	1.45	1.16835	1.79959
HOXC8	1.44	1.15531	1.80016
HOXC9	1.48	1.18751	1.8359
HOXD10	1.31	1.06109	1.62669
HTR6	0.78	0.611734	0.991278
ID1	0.82	0.677482	0.99133
IFI16	1.23	1.00239	1.51343
IFT52	1.3	1.06844	1.57487
IL11	1.23	1.00998	1.49446
IL13RA1	1.33	1.07458	1.65351
IL17A	0.76	0.628936	0.920425
IL1RAP	1.38	1.13644	1.67313
IMPA2	0.82	0.67575	0.994083
ING5	0.79	0.643267	0.980829
IQGAP1	1.49	1.18738	1.85764
IQSEC2	0.77	0.607593	0.964688
IRS1	1.22	1.01128	1.48347
IRX1	1.3	1.07229	1.58126
IRX2	0.78	0.628703	0.962393
ITGA1	1.24	1.03415	1.48596
ITGA2	1.41	1.13013	1.76487
ITGA5	1.28	1.05879	1.55051
ITGB1	1.27	1.06531	1.52328
ITGB5	1.5	1.22087	1.83551
ITGBL1	1.59	1.29209	1.96376
JRKL	1.29	1.04272	1.58573
KCNH1	0.7	0.553853	0.892252
KCTD1	1.27	1.03517	1.56825
KDM4C	0.79	0.643269	0.966308
KHDRBS1	1.22	1.00148	1.48952
KIT	0.75	0.610906	0.919902
KLF17	1.24	1.00562	1.52541
KLF2	0.76	0.619262	0.933046
KLK6	1.35	1.10191	1.65861
KLRB1	0.7	0.557375	0.877206
KLRF1	0.79	0.653166	0.966074
KMT5A	1.23	1.00452	1.51507
LATS2	1.23	1.01579	1.47834
LBH	1.25	1.01248	1.53393
LECT2	1.26	1.02521	1.55573
LGALS1	1.25	1.02262	1.52188
LIF	1.27	1.02832	1.57531
LIFR	0.8	0.649398	0.980559
LITAF	1.26	1.0184	1.55405
LMCD1	1.32	1.08097	1.60022
LMO4	0.79	0.640881	0.962949
LRP12	1.24	1.03134	1.48709
LRP8	1.39	1.12073	1.71361
LRRN2	1.24	1.01346	1.51476
LY6E	1.23	1.01828	1.49661
LZTS1	1.47	1.20555	1.79928
MADCAM1	0.67	0.537202	0.828451
MAFB	1.38	1.1195	1.69629
MALT1	1.21	1.00751	1.46114
MAP2K1	1.27	1.01225	1.59689
MAP3K15	0.81	0.665238	0.997072
MAP3K8	1.22	1.0171	1.47159
MAP4K5	1.22	1.01235	1.47303
MAS1L	0.73	0.591472	0.892401
MDFI	1.49	1.22999	1.81635
MED1	1.35	1.06798	1.6947
MED13	1.29	1.03686	1.61066
MED30	1.28	1.03199	1.59996
MEIS3	1.28	1.05851	1.54631
MET	1.52	1.2218	1.89754
MORC2	1.25	1.00372	1.55634
MORC4	1.34	1.07755	1.65554
MRAS	1.26	1.03624	1.53352
MRGPRX2	0.77	0.625441	0.955466
MS4A2	0.81	0.661792	0.991983
MS4A6A	1.24	1.00449	1.519
MSC	1.23	1.00597	1.50944
MSH6	1.23	1.00378	1.51046
MUSK	0.75	0.609285	0.925199
NDRG2	0.66	0.53751	0.821709
NFE2L3	1.26	1.02741	1.55371
NFIL3	1.26	1.05618	1.51493
NFKB2	1.35	1.11784	1.63057
NKIRAS2	1.26	1.01604	1.5727
NKX2.2	0.64	0.506499	0.807983
NKX2.3	0.74	0.592882	0.922355
NKX3.1	0.74	0.605297	0.915386
NOCT	1.51	1.20985	1.87469
NR3C2	0.72	0.583316	0.900403
NR4A2	0.75	0.607468	0.938122
NRK	1.38	1.1289	1.69161
NTF3	0.69	0.558286	0.865106
NUDT4	1.46	1.19139	1.7952
NUP98	1.24	1.0065	1.535
OLIG2	1.29	1.0375	1.59766
OPCML	0.7	0.574085	0.859191
OPRL1	1.23	1.0017	1.5163
OR10C1	1.25	1.01724	1.54731
OR2F2	0.76	0.620051	0.933192
OSMR	1.52	1.22289	1.87783
OTX1	1.28	1.03715	1.58202
P2RX2	0.77	0.614835	0.955808
P2RX3	0.78	0.641116	0.950683
PAFAH1B2	1.28	1.02068	1.60924
PAK1IP1	1.28	1.01371	1.61613
PAK2	1.39	1.11862	1.72214
PARD3	1.21	1.00734	1.44771
PAX8	1.33	1.09801	1.60592
PDCD1LG2	1.29	1.04333	1.58469
PDE10A	1.25	1.01968	1.52184
PDGFC	1.41	1.14467	1.74222
PDGFRB	1.49	1.21949	1.81067
PHTF2	1.4	1.15162	1.70403
PI4KA	0.77	0.627414	0.955443
PIDD1	0.81	0.663935	0.981203
PIK3C2B	0.82	0.677752	0.999438
PIK3CA	1.21	1.00835	1.46332
PKD2L1	1.36	1.11229	1.66083
PLCB4	0.81	0.66508	0.976931
PLCD1	0.78	0.632942	0.973468
PLCXD3	0.79	0.635655	0.970337
PLEKHG2	1.25	1.03305	1.5217
PLEKHG4	1.29	1.05727	1.57814
PLP2	1.26	1.00517	1.58673
PLXNA3	1.24	1.00206	1.53127
PLXNC1	1.37	1.10188	1.70189
PMAIP1	1.36	1.10533	1.67087
PNOC	0.75	0.600877	0.931068
POGK	1.26	1.01659	1.55669
POLR3G	1.25	1.02177	1.54145
POU1F1	0.72	0.580857	0.88404
PPARA	0.65	0.527179	0.812631
PPARGC1A	0.75	0.606726	0.93461
PPARGC1B	0.7	0.563105	0.864413
PPFIA1	1.29	1.05094	1.59319
PPP1R10	0.8	0.649155	0.98593
PPP1R13L	1.38	1.11585	1.6952
PPP4R1	1.3	1.04212	1.62432
PPT1	1.23	1.02038	1.49025
PRDM6	1.24	1.01298	1.5128
PRKAB1	0.76	0.601833	0.951802
PRKCA	0.75	0.605449	0.920222
PRRX1	1.48	1.20643	1.80816
PTGDR2	0.76	0.62954	0.924444
PTGER2	0.78	0.640345	0.960086
PTGIS	1.24	1.02123	1.50143
PTHLH	1.27	1.02689	1.55886
PTPRA	1.23	1.00168	1.50657
PTPRO	1.23	1.0079	1.51239
PTPRT	0.78	0.617926	0.972976
PTPRU	1.45	1.19388	1.75617
RAB17	0.83	0.69164	0.993656
RAB22A	1.23	1.00749	1.51273
RAB23	1.21	1.0099	1.44187
RAB27A	0.68	0.543589	0.861204
RAB31	1.4	1.1363	1.71753
RAB37	0.81	0.660499	0.985551
RAB38	1.31	1.04517	1.65319
RAB3A	0.71	0.573924	0.880654
RAB7A	1.25	1.01063	1.54537
RAD1	1.29	1.05256	1.58616
RALB	1.32	1.05017	1.65794
RALBP1	1.25	1.01429	1.53681
RALGPS1	0.79	0.649088	0.965389
RAP2A	1.4	1.13881	1.70905
RAP2C	1.34	1.06245	1.68087
RAPGEF5	1.3	1.05453	1.59686
RASGEF1C	0.74	0.597266	0.917618
REPS2	0.78	0.643688	0.938099
RGL4	0.78	0.623721	0.963792
RGS13	0.8	0.653151	0.973987
RGS4	1.24	1.02339	1.50136
RHBDL1	0.78	0.639009	0.954245
RHEBL1	1.29	1.07036	1.55088
RHOU	0.77	0.630017	0.935479
RHOXF1	0.76	0.610357	0.954505
RIC8B	1.23	1.01246	1.48625
RIN2	1.63	1.30977	2.03852
RIPK2	1.38	1.11643	1.7102
RNF2	1.34	1.09708	1.64242
RPH3AL	0.79	0.657437	0.944963
RXRA	0.75	0.610436	0.918921
S100A1	0.8	0.65133	0.990021
S100A10	1.36	1.10249	1.67266
SALL4	1.57	1.2677	1.93613
SERTAD2	1.24	1.02724	1.5011
SET	1.28	1.05462	1.55302
SGPL1	1.51	1.19729	1.89713
SGSM1	0.79	0.644114	0.975259
SH3GL2	0.8	0.654401	0.990017
SHB	1.29	1.0429	1.58667
SHC4	1.27	1.03992	1.53961
SIGLEC8	1.23	1.0153	1.49546
SLC1A2	0.74	0.603142	0.903402
SLC20A1	1.29	1.03109	1.62229
SLTM	0.76	0.610337	0.955521
SMAD3	1.3	1.03357	1.64074
SMC3	1.31	1.05472	1.62364
SMO	1.28	1.04623	1.56872
SMURF2	1.31	1.04795	1.64978
SNAI2	1.32	1.10033	1.59176
SOX3	0.73	0.596336	0.905225
SPIB	0.78	0.625182	0.972633
SPOCK1	1.48	1.21334	1.8135
SPSB1	1.31	1.07054	1.60641
SREBF2	0.78	0.641774	0.957636
STAC2	0.76	0.614092	0.944767
STC1	1.31	1.08553	1.59193
STK3	1.53	1.22112	1.92082
STK38	1.35	1.09191	1.66868
SYDE1	1.26	1.03209	1.53076
TAAR2	1.28	1.03664	1.5783
TACR3	0.79	0.625883	0.990166
TAF7	0.77	0.625964	0.94987
TARBP1	1.24	1.01296	1.5211
TAS2R14	0.71	0.572835	0.884393
TAS2R19	0.75	0.59248	0.954267
TBC1D10A	0.81	0.666132	0.996042
TBX18	1.26	1.04476	1.52811
TCEANC2	0.72	0.587797	0.890728
TEAD4	1.35	1.09586	1.66763
TENM4	1.38	1.12619	1.70307
TGFBR1	1.24	1.02808	1.49489
TGIF1	1.46	1.19483	1.77946
TGM2	1.43	1.17162	1.75533
TGS1	1.23	1.00879	1.50376
THAP7	0.78	0.632961	0.962202
THBS1	1.29	1.06982	1.56229
THRA	0.71	0.5729	0.888767
THY1	1.36	1.12738	1.65195
TLE5	0.74	0.603295	0.914327
TMEM30A	1.27	1.03255	1.55236
TNFRSF13B	0.76	0.613831	0.942232
TNFRSF8	0.79	0.633678	0.976767
TP53BP2	1.5	1.20148	1.87523
TRH	0.74	0.582051	0.946412
TRIM29	1.33	1.07269	1.64141
TRIM63	0.67	0.523461	0.847628
TRIP10	1.38	1.14193	1.65976
TSHZ2	1.27	1.02572	1.56865
TULP4	1.26	1.0285	1.54464
TWIST1	1.33	1.09195	1.61268
TYROBP	1.3	1.05489	1.59729
UACA	1.25	1.03188	1.50775
VCP	1.24	1.00819	1.51679
VGLL3	1.25	1.03301	1.51629
VGLL4	1.43	1.16761	1.74221
WDTC1	0.79	0.639976	0.964363
XPR1	1.22	1.01393	1.46871
YAP1	1.31	1.08871	1.5716
YWHAG	1.44	1.16892	1.78233
ZBED9	0.8	0.651651	0.984855
ZBTB10	1.22	1.0041	1.47081
ZBTB22	0.79	0.63501	0.975413
ZBTB33	1.3	1.0515	1.61781
ZBTB7B	0.81	0.671132	0.97748
ZC4H2	0.76	0.615855	0.942327
ZDHHC11	0.79	0.638747	0.9723
ZFAND2B	0.81	0.669715	0.988833
ZFHX4	1.25	1.02768	1.51122
ZFPM1	0.81	0.670509	0.969136
ZFYVE19	0.79	0.65458	0.957617
ZMAT4	0.78	0.620381	0.973247
ZNF239	1.26	1.00584	1.57061
ZNF267	1.39	1.11818	1.73379
ZNF395	0.73	0.589747	0.89245
ZNF417	0.81	0.662588	0.992257
ZNF439	0.8	0.648426	0.995611
ZNF44	0.73	0.585352	0.918463
ZNF473	1.31	1.06691	1.61945
ZNF474	1.3	1.07662	1.57173
ZNF493	0.78	0.647239	0.9506
ZNF532	1.22	1.0161	1.4568
ZNF536	0.65	0.521792	0.822034
ZNF544	1.27	1.02743	1.55993
ZNF552	0.75	0.616734	0.904401
ZNF554	0.79	0.637597	0.986319
ZNF596	0.76	0.612356	0.938436
ZNF597	1.28	1.03155	1.59105
ZNF630	0.78	0.639361	0.96034
ZNF675	0.79	0.645897	0.975205
ZNF688	0.78	0.628542	0.957439
ZNF697	1.5	1.2045	1.86136
ZNF747	0.8	0.650431	0.995329
ZNF766	0.74	0.590404	0.939052
ZSCAN22	0.78	0.617381	0.976141
ZSCAN30	0.79	0.637219	0.977115
ZSCAN4	0.77	0.616513	0.965341
ZYX	1.23	1.01888	1.48855
ZZEF1	0.76	0.618989	0.932418

## Sheet: OS.cross
row.names	TCGA.HR	TCGA.low	TCGA.high	GSE15459.HR	GSE15459.low	GSE15459.high	ACRG.HR	ACRG.low	ACRG.high
SNAI2	1.51	1.16792	1.96499	1.32	1.10033	1.59176	1.24	1.05605	1.44799
ANTXR1	1.46	1.11075	1.90804	1.52	1.23787	1.87219	1.34	1.1441	1.56351
PDGFRB	1.46	1.11282	1.91379	1.49	1.21949	1.81067	1.39	1.19326	1.63053
PRRX1	1.46	1.12169	1.90444	1.48	1.20643	1.80816	1.35	1.15112	1.58668
PDE10A	1.42	1.05742	1.91553	1.25	1.01968	1.52184	1.35	1.13707	1.60461
EDNRA	1.39	1.12091	1.72038	1.22	1.01876	1.45399	1.46	1.25092	1.71024
THY1	1.38	1.07389	1.76868	1.36	1.12738	1.65195	1.33	1.14348	1.55654
SPOCK1	1.37	1.07308	1.75291	1.48	1.21334	1.8135	1.36	1.16115	1.5879
F2R	1.36	1.02736	1.8001	1.58	1.27192	1.96227	1.32	1.11574	1.56932
LZTS1	1.36	1.05098	1.75761	1.47	1.20555	1.79928	1.45	1.24052	1.69826
GPR85	1.35	1.05291	1.71919	1.25	1.01942	1.53692	1.25	1.05366	1.47457
GPR176	1.31	1.0258	1.66669	1.26	1.03897	1.52628	1.28	1.10147	1.49217
ITGBL1	1.31	1.04344	1.64852	1.59	1.29209	1.96376	1.43	1.22271	1.66669
PLCXD3	1.31	1.00657	1.70295	0.79	0.635655	0.970337	1.4	1.21161	1.6283
FSTL1	1.3	1.04236	1.61474	1.38	1.12138	1.70736	1.45	1.23518	1.69799
RAB31	1.3	1.0312	1.63694	1.4	1.1363	1.71753	1.42	1.21107	1.67645
STC1	1.3	1.03814	1.61741	1.31	1.08553	1.59193	1.32	1.13259	1.54376
ACVR1	1.29	1.03913	1.61198	1.33	1.04056	1.70728	1.36	1.13136	1.63781
BDKRB1	1.29	1.02733	1.62059	1.22	1.00309	1.47363	1.41	1.20845	1.64073
DACT1	1.29	1.05229	1.58297	1.39	1.12408	1.71136	1.46	1.24815	1.70674
DOK5	1.28	1.04792	1.5552	1.44	1.16666	1.76572	1.42	1.20807	1.66047
EYA4	1.28	1.0549	1.55002	1.27	1.03947	1.54396	1.49	1.27589	1.73481
FOXC2	1.28	1.04121	1.56626	1.27	1.04414	1.55246	1.51	1.29998	1.74793
NFIL3	1.28	1.02035	1.61495	1.26	1.05618	1.51493	1.41	1.20264	1.65907
GLI2	1.27	1.01763	1.57604	1.27	1.03884	1.54479	1.49	1.28547	1.73721
GPR68	1.27	1.04237	1.55574	1.32	1.07646	1.62037	1.35	1.15393	1.57461
HEYL	1.27	1.01209	1.58443	1.4	1.144	1.70826	1.55	1.33103	1.80767
ITGA5	1.27	1.01452	1.58522	1.28	1.05879	1.55051	1.45	1.24098	1.68625
LMCD1	1.27	1.04033	1.54813	1.32	1.08097	1.60022	1.49	1.28483	1.73119
PLEKHG2	1.27	1.01664	1.57423	1.25	1.03305	1.5217	1.46	1.25478	1.69811
TENM4	1.27	1.03137	1.57613	1.38	1.12619	1.70307	1.38	1.18342	1.62039
THBS1	1.27	1.01396	1.58275	1.29	1.06982	1.56229	1.39	1.19195	1.62816
VGLL3	1.27	1.04081	1.54699	1.25	1.03301	1.51629	1.47	1.25754	1.71069
AEBP1	1.26	1.02757	1.54999	1.41	1.15587	1.72724	1.41	1.21481	1.64662
ANXA5	1.26	1.01175	1.5669	1.33	1.06411	1.6631	1.48	1.2466	1.75503
ETV1	1.26	1.03668	1.53529	1.24	1.02846	1.50059	1.47	1.25314	1.72628
GLI1	1.26	1.03268	1.53789	1.37	1.10334	1.71151	1.4	1.18437	1.6569
HOPX	1.26	1.03822	1.53875	1.65	1.31931	2.07101	1.56	1.32952	1.82774
NRK	1.26	1.03908	1.53649	1.38	1.1289	1.69161	1.42	1.21853	1.66443
EGR2	1.25	1.02775	1.51869	1.37	1.11317	1.68504	1.46	1.23623	1.72641
LRP12	1.25	1.02153	1.52812	1.24	1.03134	1.48709	1.58	1.34462	1.84864
MSC	1.25	1.02287	1.52127	1.23	1.00597	1.50944	1.35	1.1595	1.56988
TWIST1	1.25	1.02384	1.52082	1.33	1.09195	1.61268	1.36	1.16672	1.58693
CCL2	1.24	1.01047	1.52621	1.22	1.00115	1.47955	1.34	1.14284	1.57915
HEY1	1.24	1.01985	1.50535	1.23	1.01076	1.48608	1.51	1.30315	1.75448
IRS1	1.24	1.01724	1.51565	1.22	1.01128	1.48347	1.56	1.33507	1.81382
MRAS	1.24	1.01651	1.52386	1.26	1.03624	1.53352	1.54	1.31312	1.81499
PRDM6	1.24	1.02253	1.49854	1.24	1.01298	1.5128	1.51	1.29171	1.75953
PTHLH	1.24	1.02199	1.50837	1.27	1.02689	1.55886	1.37	1.16869	1.60548
PDGFC	1.23	1.00713	1.50493	1.41	1.14467	1.74222	1.45	1.2253	1.72416
PTGIS	1.23	1.01873	1.48889	1.24	1.02123	1.50143	1.53	1.33537	1.75694
SHC4	1.23	1.01392	1.50011	1.27	1.03992	1.53961	1.57	1.35824	1.81717
AXL	1.22	1.01534	1.46835	1.24	1.01185	1.50747	1.46	1.24567	1.71569
ELN	1.22	1.00479	1.47177	1.31	1.056	1.61885	1.57	1.34296	1.82656
GLI3	1.22	1.01152	1.46333	1.21	1.00392	1.46299	1.49	1.28406	1.72842
ZFHX4	1.22	1.01032	1.47806	1.25	1.02768	1.51122	1.54	1.32578	1.78705
RALGPS1	0.81	0.664756	0.997195	0.79	0.649088	0.965389	0.73	0.615967	0.854709
DFFB	0.79	0.644565	0.977815	0.74	0.599507	0.922831	0.63	0.530414	0.744192
KDM4C	0.78	0.634651	0.954827	0.79	0.643269	0.966308	0.68	0.583516	0.791909
ACAD8	0.74	0.571311	0.961784	0.7	0.573167	0.848458	0.68	0.584138	0.802425
